# Supplementary material
Source: ML conference proceedings conference paper supplement (https://openreview.net/forum?id=Sxi6gBtJcI)
Supplement: supplementary_material [file apocalypse-now-screenplay.docx]

APOCALYPSE NOW

REDUX

Written by

John Milius & Francis Ford Coppola

FADE IN:

EXT. A SIMPLE IMAGE OF TREES - DAY

Coconut trees being VIEWED through the veil of time or a dream. Occasionally colored smoke wafts through the FRAME, yellow and then violet. MUSIC begins quietly, suggestive of 1968-69. Perhaps "The End" by the Doors.

Now MOVING through the FRAME are skids of helicopters, not that we could make them out as that though; rather, hard shapes that glide by at random. Then a phantom helicopter in FULL VIEW floats by the trees-suddenly without warning, the jungle BURSTS into a bright red-orange glob of napalm flame.

The VIEW MOVES ACROSS the burning trees as the smoke ghostly helicopters come and go.

DISSOLVE TO:

INT. SAIGON HOTEL - DAY

A CLOSE SHOT, upside down of the stubble-covered face of a young man. His EYES OPEN...this is B.L. WILLARD. Intense and dissipated. The CAMERA MOVES around to a side view as he continues to look up at a ROTATING FAN on the ceiling.

EXT. IMAGES OF HELICOPTERS - DAY

They continue to fly slowly, peacefully across the burning jungle. The colored smoke comes and goes. Morrison continues with "The End".

INT. SAIGON HOTEL - DAY

The CAMERA MOVES slowly across the room...and we SEE WILLARD, a young army captain. He looks out the window to the busy Saigon street.

WILLARD (V.O.)

*

Saigon...shit. I'm only in Saigon.

Every time, I think I'm gonna wake

up back in the jungle.

He moves back to the bed, lies down. He's unshaven, exhausted, probably drunk. We SEE alcohol bottles, photos, documents scattered on the table.

WILLARD (V.O.)

When I was home after my first

tour, it was worse. I'd wake up

and there'd be nothing.

(MORE)

2.

WILLARD (V.O.) (CONT'D)

I hardly said a word to my wife

until I said yes to a divorce.

When I was here, I wanted to be

there. When I was there...all I

could think of was getting back

into the jungle. I'm here a week

now. Waiting for a mission.

Getting softer. Every minute I

stay in this room, I get weaker.

And every minute Charlie squats in

the bush...he gets stronger. Each

time I looked around...the walls

moved in a little tighter.

He's up now, naked, going into a frenzy, drinking, doing some sort of martial arts, eventually collapsing onto the floor.

FADE OUT:

FADE IN:

INT. SAIGON HOTEL - STAIRWAY - DAY

Two extremely sharp army men walk up the stairs to Willard's room, a SERGEANT and a PRIVATE.

WILLARD (V.O.)

Everyone gets everything he wants.

I wanted a mission. And for my

sins, they gave me one. Brought it

up to me like room service.

They knock on the door. A second knock.

SERGEANT

Captain Willard, are you in there?

WILLARD

Yeah I'm coming.

The army men wait for him.

WILLARD (V.O.)

It was a real choice mission. And

when it was over, I'd never want

another.

Willard unlocks the door and opens it. The men react to his condition.

WILLARD

What do you want?

3.

SERGEANT

Are you all right, Captain?

WILLARD

What's it look like?

Willard turns back into the room, sits on the bed. The Sergeant follows him.

SERGEANT

1. re you Captain Willard? 505th
2. attalion? 173rd Air-Borne?

Assigned to SOG?

Willard looks over at the Private by the door.

WILLARD

Hey, buddy, you gonna shut the

door?

The private enters the room, closing the door behind him.

SERGEANT

We have orders to escort you to the

airfield.

WILLARD

What are the charges? What did I

do?

SERGEANT

There's no charges, Captain.

The sergeant opens the letter he has been holding.

SERGEANT (CONT’D)

You have orders to report to Com-

Sec Intelligence at Nah Trang.

He holds up the letter in front of Willard's face so he can see it. We see the word 'RESTRICTED' across the top.

I see.

All right?

WILLARD

SERGEANT

WILLARD

Nah Trang, for me?

SERGEANT

That's right.

4.

The sergeant folds the letter back and puts it back in the envelope. Willard doesn't move.

SERGEANT (CONT’D)

Come on, Captain, you still have a

few hours to get cleaned up.

WILLARD

I'm not feeling too good.

He lays his head on the pillow and closes his eyes.

SERGEANT

Captain?

(to private)

Dave, come here and give me a hand.

We've got a dead one.

The two of them move over to Willard and pick him up.

SERGEANT (CONT’D)

Come on Captain, Let's go take a

shower.

WILLARD

Don't be an ass.

SERGEANT

(to private)

Get hold of him good. We're going

to take a shower, Captain.

They drag him into the shower, and turn on the cold water.

SERGEANT (CONT’D)

Stand under this, Captain.

Willard shudders and yells as they begin to clean him up. EXT. MILITARY COMPOUND - DAY

A darkly painted Huey lands in a guarded military compound somewhere in Nah Trang. The two enlisted men jump out of the helicopter, leading Willard, who seems in much better shape. As he gets out he sees a platoon of new men drilling in the hot hazy sun. They are clean and pale.

MEN (CHANTING)

I wanna go to Vietnam. I wanna kill

a Vietcong-

5.

WILLARD (V.O.)

I was going to the worst place in

the world, and I didn't even know

it yet. Weeks away and hundreds of

miles up river that snaked through

the war like a circuit

cable...plugged straight into

Kurtz.

He follows the escort across the fields as the platoon drills.

WILLARD (V.O.)

It was no accident that I got to be

the caretaker of Colonel Walter E.

Kurtz's memory, any more that being

back in Saigon was an accident.

There was no way to tell his story

without telling my own. And if his

story is really a confession, then

so is mine.

They approach a civilian-type luxury trailer. It is surrounded by concertina wire, and its windows have grenade protection, but it still seems out of place in this austere military base.

CLOSER ON WILLARD

He stands before the door for a moment, as the M.P.s guarding the trailer check his papers.

INT. TRAILER - DAY

Cool and comfortable, furnished like home. Pictures on the walls, certificates, photos of Presidents Kennedy, Johnson and Nixon and other mementos decorating the room.

A small table is covered with linen and place settings for three.

Willard enters. He salutes, and the COLONEL salutes him back.

COLONEL

(to Willard)

Captain. Good. Come on in.

WILLARD

Thank you, sir.

COLONEL

Stand at ease.

6.

Willard notices somebody O.S. and reacts.

General.

WILLARD

The General crosses over to a cabinet and picks up a pack of cigarettes, as the CAMERA REVEALS a CIVILIAN; probably with the Department of Defense, sitting at the bar, and a GENERAL sitting on a sofa.

The colonel turns and offers Willard a cigarette from the pack.

COLONEL

(to Willard)

Do you want a cigarette?

WILLARD

No thank you, sir.

COLONEL

(indicating civilian)

Captain, have you ever seen this

gentleman before?

WILLARD

No, sir. Not personally.

COLONEL

You've worked a lot on your own,

haven't you, Captain?

WILLARD

Yes, sir, I have.

COLONEL

Your report specifies intelligence,

counter-intelligence with Com-Sec,

I Corps.

WILLARD

I'm not presently disposed to

discuss those operations, sir.

There is a pause as the colonel lights his cigarette, then moves to the sofa. He bends down and picks up a dossier, looks at it.

COLONEL

Did you not work for the CIA in I

Corps?

7.

WILLARD

(pause)

No, sir.

COLONEL

Did you not assassinate a government tax collector...Quang Tri province June 18, 1968?

Willard doesn't answer.

Captain?

COLONEL (CONT’D)

WILLARD

Sir, I am unaware of any such

activity or operation, nor would I

be disposed to discuss an

operation, if it did in fact exist,

sir.

A pause. Willard is tired and confused and hung over, but he is handling himself well. The general rises.

GENERAL

I thought we'd have a bit of lunch

while we talked. I hope you

brought a good appetite, Captain.

Willard gets up and moves towards the dining table with the general and the civilian. They sit down.

GENERAL (CONT’D)

I noticed that you have a bad hand

there. Are you wounded?

WILLARD

Had a little fishing accident on R

and R, sir.

GENERAL

Fishing on R and R?

Yes, sir.

WILLARD

GENERAL

But you're feeling fit? You're ready for duty?

WILLARD

Yes, General. Very much so, sir.

The food is being passed around.

8.

GENERAL

Well, let's see what we have here.

Roast beef, and usually it's not

bad.

(to civilian)

Try some, Jerry. Pass it around.

To save a little time, we might

pass both ways.

(to Willard)

Captain, I don't know how you feel

about this shrimp, but if you eat

it, you'll never have to prove your

courage in any other way.

The colonel, who is not eating with them, walks to the table, holding a small photo.

COLONEL

(to Willard)

Captain, you've heard of Captain

Walter E. Kurtz?

He shows the photo to Willard.

INSERT THE PHOTO

It's an eight-by-ten black-and-white portrait of an army officer wearing a beret.

WILLARD

Yes, sir. I've heard the name.

The Colonel accidentally drops the dossier. Papers, photos, etc., scatter all over the floor. He stoops down to pick them up.

COLONEL

Jesus...Operations officer, Fifth

Special Forces.

GENERAL

Luke, would you play that tape, for

the captain, please?

(to Willard)

Listen to it carefully, Captain.

The Colonel moves to a tape recorder and turns it on.

MALE VOICE (ON TAPE) (V.O.)

"October 9, 04:30 hours, Sector

Peter, Victor, King."

9.

GENERAL

These were monitored out of

Cambodia. It's been verified as Colonel Kurtz's voice.

All the men, including Willard, listen in wonder.

KURTZ (ON TAPE) (V.O.)

"I watched a small snail, crawling

on the edge of a straight razor. That's my dream. It's my

nightmare. Crawling, slithering,

along the edge of a straight razor, and surviving."

MALE VOICE (ON TAPE) (V.O.)

"Transmission 11, received '68,

December 30, 05:00 hours, Sector

King, Zulu, King".

KURTZ (ON TAPE) (V.O.)

"But we must kill them. We must

incinerate them. Pig after pig.

Cow after cow. Village after

village. Army after army. And

they call me an assassin. What do

you call it, when the assassins

accuse the assassin? They lie.

They lie and we have to be

merciful, for those who lie. Those nabobs. I hate them. I really hate them."

The TAPE is TURNED OFF.

GENERAL

Walter Kurtz was one of the most outstanding officers this country's ever produced. He was brilliant. He was outstanding in every way. And he was a good man, too. A humanitarian man. A man of wit and humor. He joined the Special Forces, and after that, his ideas, methods, became...unsound.

Unsound.

COLONEL

Now he's crossed into Cambodia with this Montagnard army of his, that worship the man like a god, and follow him every order, however ridiculous. Well, I have some other shocking news to tell you.

(MORE)

10.

COLONEL (CONT'D)

Colonel Kurtz was about to be

arrested for murder.

WILLARD

I don't follow sir. Murdered who?

COLONEL

Kurtz had ordered the execution of

some Vietnamese intelligence

agents. Men he believed were double

agents. So he took matters into his

own hands.

GENERAL

Well, you see, Willard, in this

war, things get confused out there.

Power, ideals, the old morality,

and practical military necessity.

But out there with these natives,

it must be a temptation to be God.

Because the rational and the

irrational, between good and evil.

And good does not always triumph.

Sometimes, the dark side overcomes

what Lincoln called the better

angels of our nature. Every man

has got a breaking point. You have

and I have them. Walter Kurtz has

reached his. And, very obviously,

he has gone insane.

Willard looks from the colonel to the general to the civilian. They are intensely interested in his response, which they want to be "yes."

WILLARD

(carefully)

Yes, sir. Very much so, sir.

Obviously insane.

The three men pull back, satisfied.

COLONEL

Your mission is to proceed up the

Nung River in a navy patrol boat,

pick up Colonel Kurtz's path at Nu

Mung Ba, follow it, learn what you

can along the way. When you find

the colonel, infiltrate his team by

whatever means available, and

terminate the colonel's command.

11.

WILLARD

(to General)

Terminate...the colonel?

GENERAL

He's out there operating without

any decent restraint, totally

beyond the pale of any acceptable

human conduct. And he is still on

the field commanding troops.

CIVILIAN

Terminate with extreme prejudice.

The civilian hands Willard a cigarette, and lights it for him.

COLONEL

You understand, Captain, that this

mission does not exist, nor will it

ever exist.

CLOSE ON WILLARD

Smoking the cigarette, thinking about the mission.

CUT TO:

EXT. THE MEKONG DELTA - DUSK

A HUEY helicopter flying over the mountains moves over rice paddies, the Mekong River, MOVING CLOSER until we view a dock area.

WILLARD (V.O.)

How many people had I already

killed? There were those six that

I knew about for sure...close

enough to blow their last breath in

my face. But this time it was an

American, and an officer. That

wasn't supposed to make any

difference to me, but it did.

We SEE a small patrol boat. It moves away from the dock, out into the delta.

WILLARD (V.O.)

Shit. Charging a man with murder

in this place was like handing out

speeding tickets at the Indy 500. I

took the mission. What the hell

else was I gonna do?

(MORE)

12.

WILLARD (V.O.) (CONT'D)

But I really didn't know what I'd

do when I found him.

EXT. PBR - DAY

We are CLOSE ON THE BOAT, the PBR. Willard is lying on the deck, his eyes closed.

WILLARD (V.O.)

I was being ferried down the coast

in a navy PBR, a type of plastic

patrol boat, pretty common sight on

the rivers. They said it was a

good way to pick up information,

and move without drawing a lot of

attention. That was okay. I

needed the air and the time. Only

problem was, I wouldn't be alone.

Willard awakens to see a young black crewman squatting in front of him, brushing his teeth.

WILLARD (V.O.)

The crew were mostly just kids.

Rock 'n' rollers with one foot in

their graves.

(to Clean)

How old are you?

Seventeen.

CLEAN

VIEW ON CHEF, lanky, with a mustache.

WILLARD (V.O.)

The machinist, the one they called

Chef, was from New Orleans. He was

wrapped too tight for Vietnam.

Probably too tight for New Orleans.

VIEW ON LANCE, blonde, handsome, laid-back surfer type. He is sunning himself with a reflector.

WILLARD (V.O.)

Lance, from the forward 50's, was a

famous surfer from the beaches

south of L.A. To look at him, you

wouldn't believe he's ever fired a

weapon in his life.

VIEW ON CLEAN, the young black man brushing his teeth.

13.

WILLARD (V.O.)

Mr. Clean was from some South Bronx

shit-hole, and I think the light

and the space of Vietnam really put

the zap on his head.

VIEW ON THE CHIEF, an older black man. He is at the helm, studying a map of the delta.

WILLARD (V.O.)

Then there was Phillips, Chief. It

might have been my mission, but it

sure as shit was the Chief's boat.

PHILLIPS

(to Willard)

There's about two points where we

can draw enough water to get into

the Nung River. They're both hot,

belong to Charlie.

WILLARD

Don't worry about it.

He takes out a pack of cigarettes and offers one to the Chief.

CHIEF

Don't smoke. You know, I've pulled

a few special Ops in here. About

six months ago, I took a man who

was going past the bridge at Do

Lung. He was regular army, too. I

heard he shot himself in the head.

Willard lights his cigarette as the boat continues to move out into the ocean.

EXT. RIVER - THE PBR - DAY

Willard is sitting, smoking a cigarette, and looking down at a large pouch. He opens the flap and WE SEE there are several dossiers inside. He opens one, thumbing through the material. WE SEE the personal letters, photographs, reports, files-the entire case history of Colonel Walter E. Kurtz.

WILLARD (V.O.)

At first, I thought they handed me

the wrong dossier. I couldn't

believe they wanted this man dead.

Third-generation West Point, top of

his class...Korea, Airborne, about

a thousand decorations, etc., etc.

(MORE)

14.

WILLARD (V.O.) (CONT'D)

I'd head his voice on the tape and

it really put the hook in me, but I

couldn't connect up that voice with

this man. Like they said, he had

an impressive career. Maybe too

impressive. I mean, perfect. He

was being groomed for one of the

top slots in the corporation.

General, chief of staff, anything.

In 1964, he returned from a tour

with Advisory Command in Vietnam,

and things started to slip. His

report to the Joint Chiefs of Staff

and Lyndon Johnson was restricted.

Seems they didn't dig what he had

to tell them. During the next few

months, he made three

requests...for transfer to Airborne

training, Fort Benning,

Georgia...and was finally accepted.

Airborne? He was thirty-eight

years old. Why the fuck would he

do that? Special Forces, returns to

Vietnam.

Suddenly we HEAR a sound, a distant EXPLOSION. The crew all stop whatever they are doing, look out beyond the shore and the green jungled hills. There is a distant ROLLING NOISE, like interrupted thunder. The buffeting and noise continue.

CHEF

What's that?

Arc light.

What's up?

WILLARD

LANCE

WILLARD

B-52 strike.

CHEF

What's that?

Arc light!

WILLARD

CHEF

I hate that. Every time I hear that, something terrible happens.

15.

CLEAN

Charlie don't never see them or

hear them, man.

LANCE

There they are!

He points up to the sky.

EXT. SKY - FULL SHOT - DAY

Way up-past any clouds and barely discernible we SEE the black silhouettes of four B-52 bombers, their vapor trails streaming white against the dark blue sky.

CLEAN

Concussion'll suck the air out of

your damn lungs.

CHEF

Something terrible is going to

happen.

CLEAN

Smoke! Secondary burning.

FULL SHOT-COASTLINE

Black smoke rises from the jungle.

CHIEF

Hueys over there. Lots of Hueys.

WILLARD

Let's have a look Chief.

The Chief hands Willard the field glasses. He looks through them out at the burning coastline.

WILLARD (V.O.)

It was the Air-Cav, First of the

Ninth.

(to Chief)

That's them.

All the crew move to battle positions, get their flak jackets, helmets, etc.

WILLARD (V.O.)

Our escorts to the mouth of Nung

River. But they were supposed to

be waiting for us another thirty

kilometers ahead. Well, Air

Mobile. Those boys just couldn't

stay put.

16.

The PBR moves to the beach through a chaos of other boats, low-flying helicopters, and soldiers rushing by onshore.

EXT. BEACH AND VILLAGE - DAY

A vast field of devastation, smashed and burning huts, shattered sampans and bodies washing around in the surf. Willard jumps off the boat, Clean and Lance fall in behind him, they head ashore.

WILLARD (V.O.)

First of the Ninth was an old

cavalry division that had cashed in

its horses for choppers, and gone

tear-assign around Nam looking for

shit. They'd given Charlie a few

surprises in their time here. What

they were mopping up now hadn't

even happened yet an hour ago.

They make their way across the beach, weapons in hand. Explosions go off around them; there is smoke everywhere. Suddenly they are stopped by a VOICE.

VOICE (O.S.)

Go on, keep going. It's for

television. Don't look at the

camera.

Willard and the two who are following stop incredulously, their M16s still in hand.

VOICE (O.S.) (CONT’D)

Go on, go on, keep going. Don't

look at the camera.

REVERSE ANGLE OF WHAT THEY SEE

A NEWS TEAM, dressed in fatigues and combat dress. A director, cameraman, and soundman; the director keeps waving them by.

DIRECTOR

(to Troops)

Just go by like you're fighting.

Don't look at the camera. It's for

television. Just go through. Just

go by. Keep on going.

Willard, Lance, and Clean run by, staring into the camera the entire time.

17.

They make their way toward the village under siege. Willard stops to talk with a SERGEANT, as a medevac helicopter takes off in the background. The Hueys and Loches in the sky drown out most of their conversation.

CLOSE ON WILLARD

Looking up as the Hueys sweep in low.

WILLARD

Where Can I find the CO?

SERGEANT

That's the colonel coming down!

He points to a particular Huey in the sky, and moves to a clear spot by a large bomb crater. He takes out a smoke bomb and pulls the pin and lays it down in the clearing, as it spews out orange smoke.

WILLARD

(to his men)

CO's on that chopper.

Willard moves back to Lance and Clean, they all kneel, trying to avoid the propeller wash, as they look up.

FULL VIEW

The helicopter is heavily laden

with machine guns, etc., as it

lands in the middle of the

clearing.

A tall, strong-looking man jumps out of the helicopter. This is COLONEL WILLIAM KILGORE. He puts on his Air-Cav hat, then stands to his full immense height and with his hands on his hips, surveys the field of battle.

KILGORE

Lieutenant, bomb that tree line

back about a hundred yards. Give

me some room to breath.

Yes, sir!

LIEUTENANT

Kilgore starts walking, then turns and shouts to the LIEUTENANT.

KILGORE

Bring me my body cards!

18.

Yes, sir!

LIEUTENANT

The Lieutenant moves back to the helicopter and Kilgore continues forward toward a besieged village. A CAPTAIN from tank division comes running down the street, stops in front of Kilgore.

CAPTAIN

I'm the Fourth Tank commander. I've

got five tanks broken down.

KILGORE

All right with the tanks. It's all

right, Captain.

The captain turns and exits, as the sergeant walks up leading Willard, Lance, and Clean.

WILLARD

Captain Willard.

They exchange salutes. Willard takes out a set of orders and hands them to him.

WILLARD (CONT’D)

I carry priority papers from Com-

Sec Intelligence, II Corps! I

understand Nah Trang has briefed

you on the requirements of my

mission.

KILGORE

What mission? I haven't heard from

Nah Trang.

Kilgore hands the orders to the major, who has joined him. He looks at them and shakes his head "no."

WILLARD

Sir, you're supposed to escort us

into the Nung!

The major hands the orders back to Willard. By this time the lieutenant has run back in from the helicopter with the deck of playing cards. He hands them to Kilgore.

KILGORE

We'll see what we can do about

that! Just stay out of my way till

this is done, Captain!

Kilgore cracks the plastic wrapping sharply, takes the deck of new cards and fans them.

19.

Then he strides past willard and his two young crewmen with no further acknowledgement-the others follow.

He moves through the shell-pocked field of devastation, soldiers gathering around him. As he comes to each V.C. corpse, he drops a card on it, carefully picking out which card he uses.

KILGORE (CONT’D)

(to himself)

All right, let's see what we have.

Two of spades. Three of spades.

Four of diamonds, six of

clubs...there isn't one worth a

jack in the whole bunch. Four of

diamonds...

He crosses on down the street, distributing his cards on top of the dead V.C. corpses.

Willard, Lance, and Clean have been following Kilgore. Willard bends down and picks up one of the cards from a dead V.C.

LANCE

Hey, Captain, what's that?

WILLARD

Death cards.

What?

LANCE

WILLARD

Death cards. Lets Charlie know who

did this.

MOVING SHOT OF KILGORE

As he moves through the corpses, selecting a card and flipping it on a body, or putting it behind an ear.

KILGORE

(to a shell-shocked G.I)

Cheep up, son.

As they pass by a well, two G.I.s jump out of it.

G.I.

Fire in the hole!

They all hit the deck, as a tremendous explosion comes out of the well.

20.

Kilgore, his lieutenant, and major stop in back of a large gathering of villagers. They are standing around a G.I. and ARVN Interpreter, listening to them.

SOLDIER (OVER P.A.)

This is an area that's controlled

by the Vietcong and North

Vietnamese! We are here to help

you! We are here to extend a

welcome hand to those of you who

would like to return to the arms of

the South Vietnamese government.

A line of villagers are throwing all their belongs on top of a large APC parked by the road, and filing into the carrier. Kilgore stops and watches the G.I.s help them, then he moves over and looks at the inside, where the villagers are crowded together, waiting and scared.

KILGORE

(to woman)

Get in! Hurry up!

(to soldier)

Move it out!

SOLDIER (OVER P.A.)

This is an area that is controlled

by the Vietcong and North

Vietnamese...

Kilgore turns and continues down the burning street with his group. He comes upon a wounded V.C., groaning. The man has tied a wash bowl over his belly-and is groaning for water . Kilgore turns to a soldier.

KILGORE

What's this?

SOLDIER (OVER P.A.)

This man's hurt pretty bad, sir.

About the only thing holding his

guts in, sir, is that pot lid.

KILGORE

(to ARVN soldier)

Yeah? What does he have to say?

ARVN SOLDIER

This soldier is dirty V.C. He wants

water. He can drink paddy water.

KILGORE

Get out of here! Give me that

canteen.

21.

He pushes the ARVN soldier away, turns, and then gets a canteen full of water from the lieutenant.

KILGORE (CONT’D)

Any man who's brave enough the

fight-

(to ARVN soldier)

Get outta here! I'll kick you

fucking ass! Any man brave enough

to fight with his guts strapped on

him can drink from my canteen any

day.

He stoops down-starts to quench the prisoner's thirst from his canteen. A soldier rushes up to him.

SOLDIER

Colonel, I think one of those

sailors is Lance Johnson, the

surfer.

KILGORE

Where? Here? You sure?

The solder points at Lance.

SERGEANT

Down there.

Kilgore rises, hands the canteen back, and moves over to Willard and his crew. Looks at Lance.

KILGORE

What's your name, sailor?

LANCE

(salutes)

Gunner's Mate Third Class L.

Johnson, sir.

KILGORE

Lance Johnson the surfer?

Yes, sir.

LANCE

Kilgore smiles, sticks out his hand.

KILGORE

Well, it's an honor to meet you Lance. I've admired your nose riding for years. Your cutback, too. I think you have the best cutback there is.

22.

LANCE

Thank you, Sir.

KILGORE

You can cut out the "sir" crap,

Lance. I'm Bill Kilgore. I'm a

goofy foot.

Kilgore leads Lance off to meet some other soldiers. Willard's entire top-priority mission has been out in the background.

KILGORE (CONT’D)

(making introductions)

I want you to meet some guys. This

is Mike from San Diego. Johnny

from Malibu. We're pretty solid

surfers. None of us are anywhere

near your class, though.

No way.

MIKE

Lance shakes their hands. Kilgore moves on, the group follow him.

KILGORE

We do a lot of surfing around here,

Lance. I like to finish operations

early, fly down to Yung Tau for the

evening glass. Been riding since

you got here?

LANCE

No way. I haven't surfed since I

been here.

They stop to see Catholic Mass going on in the middle of a graveyard. Many helicopters continue to hover overhead. Willard looks around him, looks at the Mass being held, as the Priest continues his alter on a gravestone in the midst of the bombing and evacuations.

EXT. AREA BY DESTROYED VILLAGE - NIGHT

The area is illuminated by large cans filled with sand and jet fuel, bonfires, and the burning village in the background. There are maybe fifteen to twenty helicopters secured against the wind, in orderly patterns. Men are grouped around the fires, eating steaks, hot dogs, hamburgers, drinking beer. It has the bizarre resemblance of some sort of barbarian beach party.

23.

WILLARD (V.O.)

Kilgore had a pretty good day for

himself. They choppered in the T-

bones and the beer...and turned the

L.Z. into a beach party. The more

they tried to make it like hone,

the more they made everybody mis

it.

Kilgore is seated at the fire with some of his men, strumming a guitar and singing.

KILGORE

(to the Chief)

Make my meat rare. Rare but not

cold.

WILLARD (V.O.)

Well, he wasn't a bad officer, I

guess. He loved his boys, and you

felt safe with him. We was one of

those guys that had a weird light

around him. You just knew he

wasn't going to get so much of a

scratch here.

Kilgore looks at Willard, who more or less sits by himself.

KILGORE

What happened to your mission,

Captain? Nah Trang forget all

about you?

He laughs. Willard gets up, carrying the map he's patiently been holding. He lays it down in front of Kilgore; squats and points.

WILLARD

Sir, two places we can get into the

river. Here and here. It's a

pretty wide delta, but these are

the only two spots I'm really sure

of.

KILGORE

That village you're pointing at is

kind of hairy, Willard.

WILLARD

What do you mean "Hairy", sir?

24.

KILGORE

It's hairy. Got some pretty heavy

ordinance. I've lost a few recon

ships in there now and again.

The Chief comes over, leans in to take a look at the map.

KILGORE (CONT’D)

What's the name of that goddamn

village, Vin Drin Dop or Lop? Damn

gook names all sound the same.

(to one of the surfer

soldiers)

Mike, you know anything about this

point at Vin Drin Dop?

MIKE

That's a fantastic peak.

Peak?

KILGORE

MIKE

About six foot. It's an outstanding peak. It's got both the long right and left side, with a bowl section that's unbelievable. It's just tube city.

Kilgore considers this.

KILGORE

Well, why didn't you tell me that before? A good peak. There aren't any good peaks in this whole shitty country. It's all goddamn beach break.

MIKE

It's really hairy in there, sir. That's where we lost McDonald. They shot the hell out of us there. That's Charlie's point.

Willard sees his chance, jumps in.

CHIEF

We may not be able to get the boat in. The draft at the mouth of that river may be too shallow.

The colonel rises, looks at Willard.

25.

KILGORE

We'll pick your boat up and put it

down like a baby, right where you

want it. This is the First of the

Ninth, Air-Cav, son. Air mobile! I

can take that point and hold it

just as long as I like, and you can

get any place up that river that

suits you, young Captain. Hell, a

six-foot peak! All right. Take a

gunship back to division.

(to Lance)

Lance, go with Mike and let him

pick out a board for you. And

bring me my Yater Spoon, the eight-

six.

Mike reacts, doubtful.

KILGORE (CONT’D)

What is it, soldier?

MIKE

It's pretty hairy in there. It's

Charlie's Point.

Kilgore looks at him, exasperated.

KILGORE

Charlie don't surf!

CUT TO:

EXT. HELICOPTER FIELD OUTSIDE DESTROYED VILLAGE - DAY

It is the next morning. The helicopters, pilots, and men are ready for battle. The helicopters slowly start up, as the soldiers scurry to their various positions.

We FOLLOW Kilgore and his group, including Willard, the Chief, Clean, Lance, etc., as they walk across the field. They all get into a helicopter, except Kilgore. He takes off his hat, reaches in, and pulls out his helmet, puts it on.

ANGLE ON OUR CREW

Seated in their helicopter, looking out.

CHEF

Jesus, Clean, you ain't believe

this. Look.

WHAT THEY SEE:

26.

The PBR being airlifted up by the helicopter.

CLEAN

Hey! They're picking up the boat!

BACK TO

KILGORE'S

HELICOPTER

Kilgore picks up some gloves and starts to put them on as he crosses to the gunner by the helicopter.

KILGORE

(to soldier)

How you feeling, Jimmy?

SOLDIER

Like a mean motherfucker, sir!

KILGORE

(to bugler)

All right, son, let 're rip.

The bugler begins to play as Kilgore climbs into the helicopter.

EXTREME FULL SHOT

THE HELICOPTER takes off, rotors spinning, gas turbines belching fire from their jet pipes, sand and dust as twenty helicopters RISE.

NOISE ROAR OVER CAMERA. The helicopters deploy into a formation.

NEW VIEWS - HELICOPTERS

They move THROUGH THE FAME, almost a dance of dragonflies. INT. COMMAND COPTER - MED.SHOT - KILGORE, WILLARD, OTHERS -

DAY

Willard looks ahead, Kilgore sits

near the door. Below, they see the

jungle whisk by and are suddenly

over the ocean, low and fast.

MONTAGE - CLOSE SHOTS OF ROCKET PODS WITH MINI-GUNS

In their bizarre-looking mounts as well as the men-young, anticipating, holding their rifles, looking down.

27.

CLOSE ON WILLARD - HIS POV

Looking out from the side door. The various troop ships moving by. The men waiting, sitting on the floor, sitting on their helmets, looking back at him.

FULL VIEW OF THE HELICOPTERS

They are magnificent in the sky as they split into two columns.

INSIDE HELICOPTER

Kilgore cranes his neck and leans

out to watch the waves, then turns

back to Lance.

KILGORE

I never have got used to a light

board. I can't get used to one.

I'm used to a heavy board.

LANCE

I know, it's a real drag.

KILGORE

You prefer a heavy or light board?

Heavier.

Really?

Yeah.

LANCE

KILGORE

LANCE

KILGORE

I thought young guys like lighter boards.

LANCE

Can't ride the nose on those things.

The pilot alerts the colonel.

PILOT

(to Kilgore)

Duke Six, this is Eagle Thrust Seven. We've got it spotted.

28.

KILGORE

Eagle Thrust, put on heading two- seven-zero, assume attack

formation.

PILOT

That's a Roger, Big Duke. We're going in hot. Here we go.

KILGORE

(to Lance)

We'll come in low out of the rising sun, and about a mile out, we'll put on the music.

Music?

LANCE

KILGORE

Yeah, I use Wagner. Scares the

hell ot of the slopes. My boys

love it.

LANCE

(to Willard)

Hey, they're gonna play music!

INT. PBR CREW'S COPTER - DAY

As they near the destination, several of the soldiers take off their helmets and sit on them. The PBR crew reacts with surprise.

CHEF

How come all you guys sit on your

helmet?

SOLDIER

So we don't get our balls blown

off.

Chef laughs, looks around. Then he takes off his own helmet and sits on it.

INT. COMMAND COPTER - DAY

VIEW ON KILGORE

KILGORE

(to Pilot)

Eagle Thrust, put on psy war op.

Make it loud. This is a Romeo Fox

Trot. Shall we dance?

29.

A HAND switches on the tape deck. MUSIC COMES UP, Wagner's "Ride of the Valkyrie", blaring through the external speakers of the choppers, as they make their decent into enemy territory.

EXT. THE COMMAND HELICOPTER - DAY

With enormous twelve-driver loudspeakers BLASTING out the music.

INT. PBR CREW'S COPTER - DAY

Out crew is silent, nervous.

EXT. COPTERS - DAY

We SEE the bombs and surfboard attached to the bottom of the helicopters.

EXT. VIETCONG VILLAGE - FULL-SHOT - DAY

Typical quiet Vietnamese coastal village, rather large, built along the beach and trees with rice paddies behind. Sampans are pulled into a cove where the are being unloaded. We SEE different aspects of the life of the village, the people working there.

MEDIUM SHOT - SCHOOLYARD

A teacher and little girl come out into the courtyard, quickly followed by other students pouring from the schoolhouse in the background. A North Vietnamese soldier runs in to the teacher, who then turns back to the children. The soldier waves to the children to get out of the area.

CLOSER ON THE TEACHER

gathering children together. Peasants run through as the teacher starts the children running out. One small boy remains, an older girl runs back to get him and run after the others .

Soon the village is buzzing with activity. Trenches are used to pass weapons and ammunitions, young V.C. - both men and women. N.V.A. regulars rush along the trenches to take their positions.

NEW VIEW - N.V.A. AND V.C.

rushing along the trenches and taking the camouflage covering off a large automatic antiaircraft weapon.

30.

EXT. THE SKY - NEW VIEW - DAY

Moving behind an assault column of helicopters.

INT. COMMAND COPTER - DAY

Kilgore monitoring the transmission.

CLOSE VIEW ON WILLARD

watching the spectacle.

CLOSE VIEW ON KILGORE

calm and very effective. Seems almost like an astronaut. Willard looks down at this incredible battle.

WILLARD'S POV - AERIAL VIEW - THE VILLAGE

The village under attack. The invincible cavalry charges in, hurling all its fearful weaponry, blasting out the Wagner.

INT. POV BEHIND PILOT - DAY

PILOT

(to Kilgore)

We've spotted a large weapon down

below. We're gonna go down and

check it out.

The helicopter shakes as we SEE the smoke of the rocket shoot ahead of us.

REVERSE ANGLE

A Vietnamese house goes up in

flames.

MEDIUM CLOSE UP - GUN SHIP

sweeping down, its mini-guns FIRING. V.C. scatter.

INT. COMMAND COPTER - DAY

KILGORE

Outstanding, Red Team.

(to Pilot)

Get you a case of beer for that

one.

COPTER'S POV ON SQUARE - HIGH ANGLE

Watching!´n´n#"#car."#"#"#VietnameseThe"#"#copter"#"#"#"#circlesloadingcircles"#"#"#overammunitionover"#"#them."#them."#into"#"#"#an"#old"#"#Citro"#"#"#!"

31.

PILOT #1

We're over the village right now. I

think I see a vehicle down in the

courtyard. I'm gonna check it out.

KILGORE

Well done, Hawks. Well done. Want

some twenty-Mike-Mike-Vulcan right

along those tree-lines. Ripple the

shit out of them.

PILOT #2

Got a vehicle on the bridge, fifty

caliber on-board. He's moving

across to resupply weapon.

KILGORE

Big Duke Six. Clear the area. I'm

coming down myself.

(to himself)

Don't these people ever give up?

VIEW - THE COMMAND COPTER

It!´n´narburstscirclesthat'sburststhat'sintotryingintothetrying"#area."#to"#to"#cross"#Gunships"#"#the"#"#bridge."#hitbridge."#"#the"#"#CitroThe"#car!c"#"#bursts"#"#"#into"#" flame and the ammunition is EXPLODED.

LANCE

(to Kilgore)

Nice shoot, Bill!

The copter suddenly lurches over to the right. The ship is jostled around badly. There are some flames and smoke and it looks as though the copter has been seriously hit. There is confusion and we realize that the bullets have hit a box of flares which have gone off inside the copter.

KILGORE

(to soldiers)

Un-ass that shit and get it out of

here! It's just a flare, it's

alright, it's just a flare.

Everybody all right? Lance, you

all right?

I'm fine!

LANCE

EXT. VILLAGE - COPTERS LANDING - DAY

A small group of copters come down and land, kicking up clouds of dust. Soldiers start to jump off, run for cover, as shells hit the ground. All jump out except for one

32.

YOUNG SOLDIER.

YOUNG SOLDIER

I'm not going! I'm not going! I'm

not going!

Another soldier comes back, grabs him by the arm, and pulls him out of the copter.

NEW VIEW - AMERICANS ON THE GROUND

proceed in driving to the V.C> from the village, firing into houses. One soldier fires his rifle into a row of storage jars in front of a house. They explode. A black soldier so thrown by the blast.

SOLDIER (OVER RADIO)

We got some secondaries down there

in the plaza.

SOLDIER #2 (OVER RADIO)

Hold onto your positions.

SOLDIER (OVER RADIO)

Duke Six, Duke Six. We've got

wounded down there.

VIEW ON THE COURTYARD

Soldiers huddle around the severely wounded black G.I., who is screaming out. The RT man is frantically calling for a medevac as two Vietnamese elders babble on for their lives, explaining that they didn't know the booby trap was near their house.

MEDIC

Get a stretcher over here!

WOUNDED SOLDIER

Please, God, help me!

MEDIC

Let's give him some morphine.

SOLDIER (OVER RADIO)

Zero-three-seven-seven-four-two.

MEDIC

Where's that duster?

INT. COMMAND COPTER - DAY

Kilgore looking out the door as he flies from the river down over the courtyard.

33.

KILGORE

(into radio)

I want my wounded out of there and

in the hospital in fifteen minutes.

I want my men out.

COPTER'S POV OF COURTYARD

SOLDIER (OVER RADIO)

Somebody stand tight there with Big

Duke.

SOLDIER #2 (OVER RADIO)

This is Ten-Ten, we're going to be

in there and get out.

EXT. THE COURTYARD - DAY

As a medevac helicopter comes down landing by the smoke. They carry the wounded G.I. into the helicopter.

Frantic Americans push the two older Vietnamese into the medevac ship for questioning. A YOUNG VIETNAMESE WOMAN suddenly rushes out from one of the buildings, making a fuss about the older Vietnamese. Then she throws her coolie hat into the open helicopter door.

SOLDIER

She's got a grenade! She's got a

grenade!

EXT. HELICOPTER - HIGH VIEW - DAY

Helicopter BLOWS into flames. Men rush out on fire. They frantically try to out themselves out.

INT. COMMAND COPTER - DAY

Looking down on the burning helicopter.

PILOT

They blew the shit out of it.

KILGORE

Fucking savages.

CO-PILOT

Holy Christ, she's a SAP. I'm

gonna get that dink bitch. Get

over there, Johnny. Out the right

skid right up her ass.

34.

MEDIUM VIEW - THE GROUND

It swerves down. We can SEE the disaster as well as the three Vietnamese running away. It ROARS down, the machine gunner FIRING.

VIEW ON THE GROUND

The Vietnamese are mowed down.

OVER-THE-SHOULDER SHOT OF THE TREES BELOW THE COPTER Shells are fired from the grove of trees at the copter.

PILOT (OVER RADIO)

We gotta get some air up in these

trees. It's goddamn eat-up with

the enemy down there.

The LOH swerves past the tree line taking sniper FIRE and finally a dead-on HIT. It swerves around in circles, black smoke coming from it, cascading toward the ground.

Copters fire at the bridge. Smoke and debris fly upward. Geysers of water almost obscure it. The bridge is destroyed, the village burns in the background.

INT. COMMAND COPTER - DAY

Kilgore turns to look at Lance.

KILGORE

What do you think?

LANCE

It's really exciting, man.

KILGORE

No, no! The waves!

Oh, right.

LANCE

KILGORE

Look at that, breaks both ways.

Watch. Look! Good six-foot

swells!

EXT. BEACH - DAY

Kilgore's copter kicks up a cloud of dust as it sets down. Kilgore pop's out, followed by Lance and other officers and strides across the beach looking out toward the sea.

35.

Incoming!

SOLDIER (O.S.)

They all dive except Kilgore; he's watching a big set. The shell EXPLODES in the water about a hundred yards away, sending up a geyser of spray. Kilgore is unmoved. The others get up and join him.

MAJOR

This L.Z. is still pretty hot, sir.

Maybe you ought to surf somewhere

else.

KILGORE

What do you know about surfing,

Major? You're from goddamn New

Jersey!

He whistles Mike and Johnny over, who look like they're ready to hit the dirt again as explosions go off around them.

KILGORE (CONT’D)

I wanna see how rideable that stuff

is. Go change.

MIKE

It's till pretty hairy out there,

sir.

KILGORE

You wanna surf, soldier?

They nod "yes" meekly.

KILGORE (CONT’D)

That's good son, because you either

surf or fight. That clear?

They turn and leave. Kilgore grabs an M16 from one of the guards-they all think he's going to shoot the surfers or someone-they run back uneasy.

KILGORE (CONT’D)

One get going. I'll cover for

them.

(to others)

And bring a board Lance.

He cocks the weapon-Lance looks around uneasily.

36.

WILLARD

(to Lance)

We can't do shit till the boat gets here.

KILGORE

Lance, I bet you can't wait to get out there.

What?

LANCE

KILGORE

(gesturing to ocean)

See how they break both ways? One guy can break right, one left, simultaneous. What do you think of that?

LANCE

Bill, I think we ought to wait for the tide to come up.

He starts away.

KILGORE

Lance, come here. Look.

Incoming!

SOLDIER (O.S.)

A shell screams over-they all hit the dirt except Kilgore. It explodes, throwing sand through the air. Kilgore leans down yelling over the noise.

KILGORE

The tide doesn't come in for six

hours! You wanna wait here for six

hours?

ANGLE ON THE PBR

in the sky, being dropped by the helicopter onto the water. MEDIUM SHOT - SURF - THE TWO SURFERS

out on the water on their boards, trying to surf.

KILGORE (O.S.)

(through megaphone)

Okay, fellas, quit hiding. Let's

go, dickheads, take off.

37.

ANGLE ON KILGORE, HOLDING A MEGAPHONE

watching the surfers. JETS SCREAM overhead, FIRING CANNONS. Helicopters wheel by carrying out wounded.

WILLARD

Goddamnit! Don't you think it's a

little risky for R and R?

KILGORE

If I say it's safe to surf this

beach Captain, it's safe to surf

this beach! I mean, I'm not afraid

to surf this place! I'll surf this

fucking place!

He rips off his shirt and scarf.

KILGORE (CONT’D)

(to soldier)

Give me that R-T, soldier.

(into radio)

Dove Four, this is Big Duke Six.

Goddamnit, I want that tree line

bombed!

BOMBER PILOT (OVER RADIO)

Big Duke Six, Roger. Dove One-

Three, stand by.

KILGORE (O.S.)

(into radio)

Bomb them into the stone age, son.

He throws the R-T back to the soldier. We SEE from among the Vietnamese prisoners being herded, a woman running, covered with blood, carrying a bloody baby. She is trying to offer it up to the colonel, but a soldier is dutifully trying to keep away from him.

SOLDIER

No, ma'am, no!

KILGORE

Let me take care of this now.

(indicates soldier's

rifle)

Get that out of here!

Kilgore intercedes, pushing the soldier's rifle away.

38.

KILGORE (CONT’D)

(to woman)

Come here, now. All right. Sorry,

you can't go!

He takes the wounded baby in his hands, tenderly, and calls a soldier over.

Jimmy!

KILGORE (CONT’D)

ANGLE ON "LOC" SPOTTER PLANE IN THE SKY

LOC (OVER RADIO)

Hawk One-Two, Dove One-Three. They

need some napalm down there. Can

you put it there?

FIGHTER PILOT (OVER RADIO)

Right, One-Three. We're fixed to

fuck with them.

LOC (OVER RADIO)

Trying to suppress some mortar fire

off the tree line down there.

FIGHTER PILOT (OVER RADIO)

Roger. Here we come.

LOC (OVER RADIO)

Good. Give it all you got and

bring in all your ships. Wing

abreast.

KILGORE

(to Jimmy)

Tell them to get my chopper, get

back to the hospital.

He hands the baby to the soldier. Woman protests.

KILGORE (CONT’D)

No, no . You've got to go with him.

Go! Go!

(to soldier)

Get it out of here! And tell my

guys I want my board!

LOC (OVER RADIO)

Big Duke Six, this is Dove One-

Three. The jets are inbound now.

They got about thirty seconds to

bomb station. Get your people

back. This is gonna be a big one.

39.

Kilgore returns to Lance, who is cowering in a foxhole with Willard.

KILGORE

Don't worry. We'll have this place

cleaned up in a jiffy, son. Give

me those shorts.

He turns to his aide, who hands him a pair of Air-Cav trunks.

KILGORE (CONT’D)

(to Lance)

These are from the Air-Cav, a

present from me and the boys. I

wanna see you do your stuff out

there.

1. ets break the trees, we HEAR the EXPLOSIONS of 20mm CANNONS, and then the entire tree line ERUPTS INTO FIRE with an immense amount of napalm.
2. ilgore stands there, hands on hips, looking at the burning jungle in the distance.

KILGORE (CONT’D)

You smell that? Do you smell that?

What?

LANCE

KILGORE

(pointing to trees)

Napalm, son. Nothing else in the

world smells like that.

(crouches down)

I love the smell of napalm in the

morning. You know, one time we had

a hill bombed for twelve

hours...and when it was all over, I

walked up. We didn't find one of

them, not one stinking dink body.

The smell, you know that gasoline

smell? The whole hill- smelled

like-victory.

He looks of nostalgically. A shell comes in and HITS in the background. Willard and the soldiers react; Kilgore ignores it.

KILGORE (CONT’D)

Someday this war's gonna end.

40.

A tremendous sadness enveloping him. The he stands up and walks off. Willard turns and looks toward him. He understands what the colonel is saying to him.

ANGLE - KILGORE - WALKING OUT TOWARD THE SURF

Suddenly he senses something. He stops, lifts his hand- then licks his fingers and puts then in the air.

KILGORE

(to Lance)

Lance! The wind! The Wind! It's

blowing onshore! It's gonna blow

this place out. It's gonna ruin

it!

Sure enough, there is a rushing breeze that increases.

Not cool!

LANCE

KILGORE

It's the goddamn napalm, that's

what's doing it!

WILLARD

I'm really sorry, Colonel, but I'm

afraid that does it. The kid's got

a reputation. You can't expect him

to surf those sloppy waves.

KILGORE

I understand what you're saying.

LANCE

Yeah, I'm an artist, Bill. I

couldn't surf that crap.

MEDIUM VIEW - KILGORE, WILLARD, LANCE

Willard calmly goes about picking up Lance's clothes as Kilgore apologizes to Lance for the conditions.

KILGORE

Look, I apologize. It's not my

fault. The waves are getting blown

out by the napalm. It's the bombs

causing a vortex with the wind.

LANCE

I accept your apology.

KILGORE

Hang around just twenty minutes.

41.

WILLARD

Some other time, Bill.

KILGORE

Just twenty minutes!

Willard grabs Lance and walks him away from Kilgore.

LANCE

I'm an artist!

WILLARD

(to Lance)

Keep walking.

Kilgore takes the megaphone.

KILGORE

(into megaphone to

surfers)

Let's give it a try, guys. One

goes left and one goes right.

(to Lance)

Look, Lance...

Lance and Willard keep walking, fast.

WILLARD

You through surfing? Wanna say

good-bye to the colonel?

No!

You sure?

Yeah!

LANCE

WILLARD

LANCE

WILLARD

Then let's get the fuck out of

here!

Kilgore is left frantic on the beach with his megaphone.

KILGORE

(calling to them)

Lance, it's the fucking napalm!

Just wait twenty minutes! Fuck!

Willard and Lance run like hell toward the PBR in the distance. In his frustration, Kilgore throws the megaphone in the air and wanders off.

42.

AT THE PBR

The crew help Willard and Lance climb onto the boat. Suddenly Willard sees something and stops. In a pile of equipment that the Hueys left are two surfboards-willard looks at them.

WILLARD

(to PBR)

Don't leave without me!

CLEAN

Where the fuck are you going?

He runs to the copter where Kilgore's surfboard is attached.

Incoming!

WILLARD

All the soldiers at the copter duck and during that moment, Willard snatches the colonel's surfboard. A soldier tries to stop him.

SOLDIER

That's the colonel's surfboard!

WILLARD

1. et the fuck off me! It's mine!
2. e rushes back to the boat, handing the board up to Clean, and scampers aboard. Clean stuffs the board in the stern. The boat turns, ENGINES RUNNING HARD AND ROARS OFF toward the deeper water of the river.

MEDIUM CLOSE SHOT - WILLARD

On the bow: laughing, exhausted, feeling satisfied with himself.

EXT. VILLAGE - DAY

The PBR passes the burned-out village, through the destroyed bridge, and heads out toward the river.

EXT. PBR - DAY

The crew relaxing. Clean sits down next to Chef, who is rolling a joint.

CLEAN

Chef, light up, man. Come on,

let's get high.

43.

CHEF

(to Lance)

Wanna smoke?

Light up.

CLEAN

WILLARD (V.O.)

Someday this war's gonna end. That'd be just fine with the boys on the boat. They weren't looking for anything more than a way home.

Captain?

CHEF

Chef offers the joint to Willard. He waves it off.

WILLARD (V.O.)

Trouble is, I'd been back

there...and I knew that it just

didn't exist anymore.

LANCE

(to group)

Buddha time.

The crew shares the joint.

CLEAN

All right. That's grass. That's

shit.

Willard pours himself a drink from a bottle.

WILLARD (V.O.)

If that's how Kilgore fought the

war...I began to wonder what they

really had against Kurtz. It

wasn't just insanity and murder.

There was enough of that to go

around for everybody.

EXT. RIVER - FULL SHOT - THE BOAT - DUSK

It is parked, hidden under some trees along the riverbank.

CHEF (O.S.)

I'm not here...I'm walking through

the jungle gathering mangos, and I

meet Raquel Welch. I can male nice

mango cream pudding. You know,

kind of spread it around on us...

44.

Chef is lying on his back, his eyes closed. Lance is standing on the riverbank next to the PBR. He is taking a leak. He finishes, then turns and squats next to a blue bucket and starts washing his Air-Cav trunks.

CHEF (CONT’D)

...See, she's into mangoes, too.

She's like one limb above me. We're

both in the jungle here, nude.

We HEAR a helicopter coming toward the vicinity of the boat. The wind begins to hit the trees and boat.

CLEAN

(to Chief)

Hey, Chief? Here comes that

colonel guy again.

The SOUND of the helicopter gets closer...and an indistinguishable language on a loudspeaker. Lance gathers his bucket and soap and jumps up on the PBR.

KILGORE (OVER P.A.)

"I will not harm or hurt you. Just

give me back the board, Lance. It

was a good board and I like it. You

know how hard it is to find a board

that you like."

The helicopter drones on into the distance-the same speech starts again farther off-finally the noise ceases.

CHEF

Determined motherfucker, ain't he?

Cock-sucker!

Willard snaps off a salute at the passing copter. It disappears into the distance.

CLEAN

Jesus Christ. That guy's too

fucking much, man.

LANCE

Do you think he would've shot us?

WILLARD

He would've shot us on the beach,

or if he saw me taking his board.

CLEAN

(singing)

Let's go surfing now, Everybody's

learning how..

45.

LANCE

Let's get this board out of my turret.

Sucker.

CLEAN

LANCE

Come on, how am I gonna shoot him

the next time he comes around?

WILLARD

Hey, Chef, make some room back

there for the board.

They stow the board in the back of the boat, hiding it.

CHIEF

I wonder if that's the same

chopper.

WILLARD

Hell, he's probably got them all

over the river with that recording.

We'll have to hold up here till

dark, Chief.

(to Lance)

Don't worry Lance, he won't follow

us too far.

LANCE

What makes you say that?

WILLARD

You think that Cav colonel wants

everyone up river to know we stole

his board?

LANCE

I didn't steak it!

Willard laughs, lights up a cigarette.

CHIEF

Captain? Just how far up this

river are we going?

WILLARD

That's classified, Chief. I can't

tell you. We're going up pretty

far.

CLEAN

Is it gonna be hairy?

46.

WILLARD

I don't know, kid. Yeah, probably.

CHIEF

You like it like that, Captain?

When it's hot, hairy?

WILLARD

Fuck.

(a beat)

Maybe you'll get a chance to know

what the fuck you are in some

factory in Ohio.

Chef steps forward with a plastic bucket.

CHEF

Hey, Chief, I'm gonna go get those

mangoes now, okay?

CHIEF

Take somebody with you.

WILLARD

I'll go with him.

He turns and follows Chef off the PBR. They climb up the bank, away from the boat, into the jungle.

EXT. JUNGLE - MEDIUM VIEW - DUSK

Chef and Willard cautiously walk through the dark underbrush. We SEE fragments of them, LOSE then occasionally, and just MOVE through the jungle. WE HEAR this conversation throughout:

Chef?

Yes, sir.

WILLARD

CHEF

WILLARD

How come they call you that?

CHEF

Call me what, sir?

WILLARD

Chef. 'Cause you like mangoes and stuff?

47.

CHEF

No, sir. I'm a real chef. I'm a saucier.

Saucier?

WILLARD

CHEF

Yes, sir. See, I come from New

Orleans. I was raised to be a

saucier. A great saucier.

WILLARD

What's a saucier?

CHEF

We specialize in sauces. Gotta be

a mango tree here somewhere...Then,

I was supposed to go to Paris, to

the Escoffier School. But then I

got orders for my physical.

As they move deeper into the jungle.

CHEF (CONT’D)

Well, I joined the navy. Heard

they had better food. Cook school,

that did it.

WILLARD

Oh, yeah? How's that?

Chef puts down his bucket and rifle, takes a leak. Willard takes a few steps farther in the jungle and then sits by him on a log.

CHEF

You don't wanna hear about that.

They lined us up in front of a

hundred yards of prime rib. All of

us, you know, looking at it?

Magnificent. Magnifique. Next

thing, they're throwing the meat

into these big cauldrons.

Willard has heard something in the jungle during this explanation. He becomes alert.

CHEF (CONT’D)

All of it. Boiling it. I looked

inside, man, it was turning grey. I

couldn't fucking believe that one!

That's when I applied for

radioman's school, but they-

48.

Chef looks up, seeing Willard standing a distance away, poised with his rifle. Willard signals to him to come cautiously. He motions to Chef to move with him, each covering the other. They walk a few yards from where they have heard something move.

CHEF (CONT’D)

What is it? Charlie?

MEDIUM SHOT - PANNING - WILLARD

moving through the jungle cautiously, he is comfortable in this environment. He signals and directs his way very expertly, giving silent instructions to Chef on how to move with him.

They seem to have the intruder localized and proceed very quietly toward where he is.

MEDIUM SHOT - THE ELEPHANT GRASS - WILLARD AND CHEF Suddenly the grass folds almost to Willard, and a huge TIGER

leaps out at them, snarling magnificently. They fire wildly, emptying their clips.

CHEF

It's a motherfucking tiger! It's a

tiger, man! A tiger!

He turns and bolts through the jungle, as scared as a man can be.

CHEF (CONT’D)

Motherfucking tiger!

Willard backs out of the clearing, covering the bushes and runs, scared out of his head as well. They fire their M16s indiscriminately running back to the boat, screaming.

FULL SHOT - THE BOAT

The crew is armed. They've heard the screaming. Lance has the twin fifties pointed into the jungle. Chef comes screaming out of the brush. Throws his rifle in the boat and dives headfirst after it.

CHIEF

Battle stations. Lance, up front.

Get on your sixty, Clean.

CHEF

Fucking tiger!

49.

Let's go!

CLEAN

CHEF

Chief, you were right. Never get out of the fucking boat!

CHIEF

Clean, bring that 60 forward.

CHEF

Never get out of the boat! I gotta remember! Gotta remember! Never get out of the boat!

CHIEF

How many is it?

CHEF

A fucking tiger!

What?

Tiger!

Tiger?

CLEAN

CHEF

CHIEF

CHEF

(going berserk)

I'm done with this goddamn fucking shit! You can kiss my ass on the county square, because I'm fucking bugging out! I don't fucking need it! I didn't get on the goddamn A train for this kind of shit! All I wanted to do is fucking cook! I just wanted to learn to fucking cook, man!

The others try to calm him down.

LANCE

You're all right. You're all right.

CHEF

All right. It's gonna be all right. It's gonna be all right. Never get out of the boat. 'Bye, tiger! 'Bye tiger!

50.

The boat pulls away as he continues ranting about the tiger. CLOSE ON WILLARD

Looking back into the jungle.

WILLARD (V.O.)

Never get out of the boat.

Absolutely goddamn right. Unless

you were going all the way.

EXT. RIVER - THE PBR - NIGHT

The PBR moves down the dark, silent river through the night.

WILLARD (V.O.)

Kurtz got off the boat. He split

from the whole fucking program. How

did that happen? What did he see

here that first tour?

Willard lights a cigarette and holds a flashlight as he looks at the dossier. As he speaks we see CLOSE SHOTS on the newspaper articles, letters, and photos.

WILLARD (V.O.)

Thirty-eight fucking years old. If

you joined the green berets, there

was no way you'd ever get above

colonel. Kurtz knew what he was

giving up. The more I read and

began to understand, the more I

admired him. His family and

friends couldn't understand it. And

they couldn't talk him out of it.

He had to apply three times, and he

put up with a ton of shit, but when

he threatened to resign, they gave

it to him. The next youngest guy

in his class was half his age.

They must've thought he was some

far-out man humping it over the

course. I did it when I was

nineteen, it damn near wasted me.

A tough motherfucker. He finished

it. He could've gone for general,

but he went for himself instead.

MEDIUM VIEW - OF THE PBR

gliding up the river. Chef is sitting in the back of the boat, writing a letter. He is using a flashlight to see by, as he reads to himself outloud as he writes.

51.

CHEF

(writing letter)

Dear Eva. Today was really a new

one. Almost got eaten by a fucking

tiger. Really un-fucking

believable, you know? We're taking

this guy, Captain Willard, up

river, but he hasn't told us yet

where we're taking him...

Clean is at the helm, singing to himself, the Chief is sleeping. Willard looks at an article about Kurtz in a magazine.

WILLARD (V.O.)

October, 1967. On special

assignment, Kontoom Province, Two-

Corps...Kurtz staged Operation

Archangel with combined local

forces. Rated a major success. He

received no official clearance. He

just thought it up and did it. What

balls. They were going to nail his

ass to the floorboards for that

one. But after the press got a

hold of it, they promoted him to

full colonel instead. Oh, man, the

bullshit piled up so fast in

Vietnam, you needed wings to stay

above it.

Suddenly, from around a bend, the boat is illuminated by a strange artificial light. Lance and Chief are awakened. Willard reacts as he looks out toward the light. It becomes brighter and brighter as they move closer.

WHAT THEY SEE:

EXT. HAU PHAT - FULL VIEW - NIGHT

The PBR goes by the base, tents, oil drums, sandbagged bunkers, etc., but the biggest surprise of all is a huge oval STAGE built in the water, lit by banks of lights. Preparations for some sort of show are in progress.

They all react, incredulous, as the PBR pulls into the bay and up to the dock.

CLEAN

This sure enough is a bizarre sight

in the middle of all this shit.

52.

CHIEF

(to Willard)

Expecting us this time?

WILLARD

Damned if I know.

It looks like an amusement park, with strings of lights, etc.

CHEF

Jesus Christ...

EXT. SUPPLY DOCK AREA - NIGHT

The supply docks of this base. Tents, oil drums, sandbagged bunkers, helicopters, tanks, guns, and men. As they walk, Chef and Clean stop a moment and look at a group of motorcycles. The dock is crowded with all kinds of goods, freezers, refrigerators, etc., all the nonessentials for fighting a war.

CLEAN

Hau Phat. You ever been up here

before, Chef?

CHEF

I bet you could score up here.

CLEAN

Yo, man, check out the bikes, man.

Yamaha, Suzuki.

CHEF

That's a good one.

CLEAN

Yeah, Sukiyaki.

Willard moves on, Chef and Clean catch up with him.

CLEAN (CONT’D)

This must be the guy.

WILLARD

Right over there.

Willard and the men approach a harried SERGEANT at a requisition desk, filling out papers, answering questions, shouting out orders to the frenetic activity around him. There are soldiers scurrying back and forth, loading and unloading supplies. They constantly interrupt the sergeant with their questions.

53.

Chef and Clean stop in front of the sergeant.

CLEAN

Three drums of diesel fuel, PBR- Five...

SERGEANT

Move! We have one hour, that's all!

(to Clean)

What do you want?

CHEF

Can I get some Panama Red?

SERGEANT

Panama Red? Yeah, I'll get you Panama Red.

Sergeant.

CLEAN

SERGEANT

Destination?

CLEAN

I don't have a destination.

SERGEANT

You can't get a goddamn thing without a destination.

Willard steps in.

Sergeant.

WILLARD

SERGEANT

I need a destination. I can't do a goddamn thing about it.

WILLARD

Hey, Sarge, these guys are with me. Destination classified. I carry

priority papers from Com-Sec

Intelligence, II Corps.

SERGEANT

Listen, sir, it's a real big night- (to another soldier)

Eight dollars for that camera-

54.

With unexpected rage, Willard suddenly reaches up and grabs the Sergeant by the collar, pulling him down across a table, really frightening him. Everybody is quite surprised.

WILLARD

Just give them some fuel.

SERGEANT

You got it.

Willard lets go of the sergeant, almost embarrassed for the show of temper. The sergeant goes back behind his desk and starts signing papers.

SERGEANT (CONT’D)

Listen, Captain...I'm really sorry

about tonight. It's really bad

around here. Just take this over

to the man at the supply desk and

you got it.

He tears off a requisition and hands it to one of the trio.

SERGEANT (CONT’D)

(to crew)

Listen, would you guys like some

press box seats for the show? You

want those? The show, man, out

here. The bunnies.

LANCE

The Playboy bunnies?

The sergeant finally leaves the trio, grabs a bottle of cognac, and moves to Willard. Hands him the bottle.

SERGEANT

Hey, listen, Captain...on the

house. No hard feelings.

Willard looks down at the bottle in his hand and then up at the stage.

DISSOLVE TO:

The SOUND of ENGINES is heard. A HUEY and TWO LOCHES descend from the clouds. The Loches hover and circle, while the Huey descends onto the platform stage. There is a large black-and-white PLAYBOY INSIGNIA painted on the nose.

EXT. STAGE - FULL SHOT - NIGHT

The entire area around the stage and right up to the barbed wire is mobbed with hundreds of seething American men.

55.

Some of these boys have just gotten here, others have been in the jungle for months. It's the Vietnam military version of a happening. Guys from all walks of life, from the cities, guys with flowers in their hair and peace signs around their necks, other guys with their short-time sticks and war medallions around their necks. Black G.I.s congregate together with their clenched-fist black power medallions. There are signs and posters and graffiti everywhere. Some guys have guitars, everyone seems to have a camera. Rummaging, sitting, waiting expectantly, before the enormous stage, which is protected by rings of concertina wire, a moat, and M.P.s every three feet at riot control positions. Many joints and pipes are being passed around. Snapshots are being taken. It has a strong resemblance to a love-in or even Woodstock. Except that they're all in various degrees of combat fatigues, and they're all men.

CHEF, CLEAN, LANCE, WILLARD AND THE CHIEF move down an aisle to their seats. It is through WILLARD'S EYES that we see this spectacle, bad every so often we will see an enthusiastic Lance, Chef, and Clean. The Chief remains noncommittal, and somewhat bored. To the others, it's a wonder of wonders.

Over by the dock, behind the chain-link fence, there is a group of VIETNAMESE who have gathered to watch the show. They have brought rice, food, etc. They will watch and react throughout, along with the American soldiers who are standing guard in front of them.

VIEW ON THE STAGE

The Playboy copter descends onto the stage. The door of the Huey slides open and TWO YOUNG GREEN BERETS step out with their M16s to varied CATCALLS. When this abates, a young and extremely well-dressed man emerges. He is the epitome of the Hollywood agent. He's informal, high-strung, and good at what he does. His presence causes some stirring and occasional shouts of "ripoff" from the men. He gets a microphone from the stage, then walks to the front and addresses the men.

AGENT

How you doing out there?

(beat and reaction)

I said how you doing out there?

(beat and reaction)

Wanna say hello to you from all of

us up here, to all of you out

there, who work so goddamn hard on

Operation Brute Force. Hello, all

you Paratroopers out there! And

the Marines! And the Sailors!

(MORE)

56.

AGENT (CONT'D)

We wanna let you know that we're

proud of you, 'cause we know how

tough and how hard it's been!

Yeah! And to prove it, we're gonna

give you some entertainment we know

you're gonna like!

The band starts its rock 'n' roll amp, playing the Creedence Clearwater Revival rendition of "Suzy Q".

AGENT (CONT’D)

Miss August, Miss Sandra Beatty!

Miss Nay, Miss Terri Tersay! And

the Playmate of the year, Miss

Carrie Foster!

Two very beautiful PLAYMATES in exotic, brief costumes come out of the helicopter. They are TERRI and SANDRA, and they start swaying to the music.

SANDRA

Hello, out there!

The two playmates jump down and dance to the front of the stage. The G.I.s go crazy and the girls dance their erotic dance. In the meantime. The two Green Berets at the helicopter help out the PLAYMATE OF THE YEAR, CARRIE FOSTER.

The Berets carry the Playmate out on their rifles to the center of the stage, and put here down. She dances forward and joins the other two girls and the front. Carrie is dressed in a Western outfit. They all dance to "Suzy Q".

VIEW OF THE CROWD

Appropriately, they go wild.

MARINE

I'm here, baby! I'm here!

LANCE

(to Terri)

You fucking bitch!

MEDIUM CLOSE SHOT - THE AGENT

Looking at little worried.

ANGLE ON WILLARD AND THE CHIEF

watching the spectacle. Willard takes a drink from the bottle that was given to him by the supply sergeant.

57.

HIS POV

The three Playmates going through

all their gyrations.

MEDIUM CLOSE SHOT - WILLARD

Reacting, shaking his head. Chef, Lance, and Clean all think it's fantastic.

VIEW ON THE CROWD

Audience continues to react as the three Playmates sway and hump. Fights are breaking out. Some of the G.I.s pull out centerfolds of the three girls from under their uniforms.

MARINE

Sign my centerfold!

He leaps madly, climbing up on the stage. Other guys start to follow him. The M.P.s try to stop them but to no avail. Before you know it, a mba is storming the stage.

VIEW ON AGENT

Knows the show is over.

AGENT

(to Pilot)

Start her up.

(to M.P.s)

Get the girls! Let's go!

(to crowd)

1. o long!
2. he Playmates are helped back into the helicopter. The rotors whine and the Huey lifts off just as the first of the enthusiast mob reaches it. The agent sets off a smoke bomb to disperse the crowd. Some guys are even hanging onto the skids of the helicopter. They finally let go and fall into the water below, as the helicopter flies away.

WILLARD (V.O.)

Charlie didn't get much U.S.O. He

was dug in too deep or moving too

fast. His idea of great R and R

was cold rice, and a little rat

meat. He had only two ways home-

death, or victory.

DISSOLVE TO:

58.

EXT. HAU PHAT - DAY

As the PBR pulls away from the Hau Phat area, Willard looks back at the clean-up operations, a helicopter hovers over the littered area, shirtless men sweep and mop up the stage, burn trash; others dismantle the floating lights.

WILLARD (V.O.)

No wonder Kurtz put a weed up

Command's ass. The war was being

run by a bunch of four-star clowns,

who were gonna end up giving the

whole circus away.

EXT. PBR - DAY

Chief is steering the boat. Chef is looking at a Playboy magazine centerfold of Terri.

CHEF

You know, man, that was far fucking

out. I collected every picture of

her since she was Miss December.

(showing Clean the

centerfold)

Hey, Clean, look at that. She was

here, man! I even wrote to the

cunt. She didn't write me back.

CLEAN

You can get really hung up on these

broads, like that cat in the delta.

CHEF

Yeah. What cat?

As Clean talks, Chef tears the centerfold out of his Playboy, then kneels down by the bulkhead in back of the wheel. He tapes the centerfold onto the bulkhead.

CLEAN

The one that went up for murder? He

was an army Sergeant. This cat, he

really dug his Playboy, man.

As he continues, Lance moves to the back of the boat and starts unwrapping the plastic from his new water skis.

CLEAN (CONT’D)

I mean, this cat, when the thing

arrived, he was there to meet it,

man!

59.

CHEF

(indicating photo)

Look at these beautiful fucking

jugs, man!

CLEAN

Anyway, he was working ARVN

patrols, had one of them cocky gook

asshole lieutenants, and one day

the gook took his magazine and

wouldn't give it back! Cat said

"Gimme my magazine back!" Good

said, "You shut up. I have you

court- martialed", you know?

CHEF

Typical fucking ARVN, man.

CLEAN

The gook went too far.

CHIEF

Chef, take the wheel.

Chef takes the wheel of the boat as the Chief moves back and starts brushing his teeth. Lance continues to unwrap his skis.

CLEAN

Sticking pinholes and mutilating

the centerfold and shit like that.

And the sergeant said, "You better

not do that to her. You leave your

shitty little gook hands off of

that girl!" Gook say, "Fuck you!"

In Vietnamese, right? Sergeant,

man, he just couldn't handle it no

more. He just picked up his iron-

He picks up an M16 rifle to demonstrate.

CLEAN (CONT’D)

-flipped it to rock 'n' roll and

boom! Gave that little zero a long

burst straight through the Playboy

mag. It blew his ass clear out off

the dock. There wasn't no more

lieutenant that day. That was it

for his ass.

CHEF

They burn him for it?

60.

CLEAN

The sergeant? Yeah, man. They

stuck his ass in the L.B.J. It's

too bad he didn't get no medals or

nothing.

He puts the rifle back in the rack. Disappears down the hole of the ship. They all shake their heads at the cruel injustice of life.

CHEF

Fucking ARVN, man. They should've

killed the fuck. Should've given

that fucker a Silver Star. Bummer

for the gook, though, ain't it?

EXT. RIVER - THE PBR - DAY

We HEAR a radio station playing. Willard is seated looking through the dossier, documents from the C.I.A.

RADIO HOST (OVER RADIO)

Good morning, Vietnam. I'm Army

Specialist Zack Johnson on A.M.N.V.

It's about eighty-two degrees in

downtown Saigon right now, also

very humid...

Clean is standing on the front of the boat, he has a small transistor radio in his hand.

RADIO HOST (OVER RADIO) (CONT’D)

...and we have an important message

for all G.I.s who are living

offbase from the mayor of Saigon.

He's like you to hand the laundry

up indoors, instead of the

windowsills. The major wants you to

keep Saigon beautiful. And now,

here's another blast from the past

going out to Big Sam, who's all

alone out there with the First

Battalion, 35th Infantry, and

dedicated by the Fire Team and

their groovy C.O. The Rolling

1. tones, "Satisfaction."
2. he music comes on, Clean starts dancing, keeping time to "Satisfaction." The others cheer him.

CHEF

Work out, Clean! Get down, bubba!

(to Lance)

Hang on, Lance!

61.

We SEE that Lance is water-skiing behind the PBR, waving to the guys.

CLEAN

(dancing)

Can you dig it, man? Can you dig

it?

(to Chef)

I see you're right on target.

(to group)

Work out! Yeah! Yeah!

The boat passes a Vietnamese fishing boat, capsizing it in its wake.

VIEW ON WILLARD

He's found himself in a corner in the boat. He looks to the front where Clean is moving and dancing to the MUSIC, to the rear where Lance is water-skiing, and looks down to his dossier, with its odd assortment of photographs, reports, and letters.

WILLARD (V.O.)

"Commitment and Counterinsurgency"

by Walter E. Kurtz. "As long as

our officers and troops perform

tours of duty limited to one year,

they will remain dilettantes in

war, and tourists in Vietnam. As

long as cold beer, hot food, rock

'n' roll, and all the other

amenities remain expected norm, our

conduct of the war will only gain

impotence. We need fewer men, and

better. If they were committed,

this war could be won with a fourth

of our present force."

FULL SHOT - THE PBR CREW

The Chief is at the helm. He takes off his sunglasses and looks straight ahead, reacting.

HIS POV:

Two PBR's coming straight at them. The lead PBR is headed on a collision course.

CLEAN

Shit. Chicken time. You ain't

shittin', bro. They're

motherfuckers.

62.

LANCE

Who is that? What's going on?

All are looking forward. The Chief grabs the loud-hailer.

CHIEF

(over loud-hailer)

Is that you, Lazzaro?

CHEF

(to Chief)

Don't chicken out.

The lead PBR keeps coming on in a game of "chicken," the rock music blaring from its speakers. Then it swerves at the last possible moment and fishtails past. One of its CREWMEN moons our crew. Lance, Chef, and Clean shout back and give them the finger.

Chicken!

LOUDSPEAKER

The other PBR fishtails past also, causing a lot of turbulence in the water. The crew gives our boys the finger, then one of them throws a SMOKE BOMB. It lands on the canopy.

The smoke bomb spews out its YELLOW SMOKE, and suddenly the canopy catches on fire.

CHIEF

Fire on the canopy!

Chef grabs a fire extinguisher and tries to snuff the fire out.

CHEF

I got it! Get out of there!

Chief keeps roaring down the river as the others continue to fight the fire. Finally they get it out . Willard stands there, dumbfounded, and reacting, as we:

DISSOLVE TO:

EXT. RIVER - THE PBR - DAY

The PBR continues down the river. Lance gives a handful of palm leaves to Chef, who is sitting up on top of the canvas roof, trying to patch up the hole that was caused by the fire. Clean has a pair of drumsticks and is beating out a drum rhythm, really getting into it.

63.

Willard studies the dossier; some photos and Vietnamese I.D. cards.

WILLARD (V.O.)

Late summer, autumn 1968. Kurtz's

patrol into the highlands is coming

under frequent bush. The camp

started falling apart. November.

Kurtz orders assassinations of

three Vietnamese men and one woman.

Two of the men were colonels in the

South Vietnamese Army. Enemy

activity in his old sector dropped

off to nothing. Guess he must have

hit the right four people.

INSERT - BLACK & WHITE PHOTO OF THE GENERAL

GENERAL (O.S.)

(to Willard)

He joined the Special Forces, and

after that he...

BACK TO WILLARD

WILLARD (V.O.)

The army tried one last time to

bring him back into the fold. And

if he'd pulled over, it would have

been forgotten.

GENERAL (V.O.)

...unsound.

WILLARD (V.O.)

But he kept going. And he kept

winning it his way.

GENERAL (V.O.)

(to Willard)

...with this Montagnard army of

his.

WILLARD (V.O.)

And they called me in.

GENERAL (V.O.)

(to Willard)

...like a god, and follow every

order, however ridiculous.

64.

WILLARD (V.O.)

They lost him. He was gone.

Nothing but rumors and random

intelligence, mostly from captured

V.C. The V.C. knew his name by now,

and they were scared of him. He and

his men were playing hit and run

all the way into Cambodia.

Clean's drum rhythm is annoying Willard. He puts a map back into his dossier, rises, and looks at Clean, pissed, then looks to the Chief.

Clean.

CHIEF

Clean stops drumming, moves away.

WILLARD

(to Chief)

How long has that kid been on this boat?

CHIEF

Seven months.

WILLARD

He's really specializing in busting

my balls.

CHIEF

Very possibly, Captain, he thinks

the same of you.

Willard moves over to Chief.

WILLARD

Oh, yeah? What do you think,

Chief?

ANGLE ON CLEAN

Clean gives Willard the finger behind his back.

CHIEF

I don't think. My orders say I'm

not supposed to know where I'm

taking this boat, so I don't. But

one look at you and I know it's

gonna be hot, wherever it is.

Willard comes into the cabin, looks at the Chief.

65.

WILLARD

We're going up river, about seventy-

five clicks about the Do Lung

bridge.

The Chief reacts, figuring it out almost immediately.

CHIEF

That's Cambodia, Captain.

WILLARD

That's classified. We're not

supposed to be in Cambodia, but

that's where I'm going. You just

get me close to my destination, and

I'll cut you loose.

CHIEF

All right, Captain.

DISSOLVE TO:

EXT. RIVER - THE PBR - DAY

The PBR moves down the river. Willard is studying the dossier, holding a LETTER from Kurtz to his son.

WILLARD (V.O.)

(reading letter)

"Dear Son. I'm afraid that both

you and your mother will have

worried at not hearing from me

during the past weeks, but my

situation here has become a

difficult one. I have been

officially accused of murder by the

army. The alleged victims were

four Vietnamese double agents. We

spent months uncovering then and

accumulating evidence. When

absolute proof was completed, we

acted. We acted like soldiers. The

charges are unjustified. They are,

in fact, and under the

circumstances of this conflict,

quite completely insane."

The boat moves past some DEAD AMERICAN PILOTS. Their bodies are lying in the water, on the bank, and in the trees, all torn apart and bloody. There is smoke and debris all around.

66.

WILLARD (V.O.)

(continuing reading

letter)

"In a war, there are many moments

for compassion and tender action.

There are many moments for ruthless

action. What is often called

ruthless, but may, in many

circumstances, be only clarity.

Seeing clearly what there is to be

done, and doing it directly,

quickly, awake.

They come upon a burning helicopter, which has crashed in one of the trees on the shore. This explains the dead American bodies. The Chief picks up the radio phone, calling to headquarters.

CHIEF (OVER TAPE)

Request-dust off. Three, maybe

four KIAs.

WILLARD (V.O.)

(continuing reading

letter)

"I will trust you tell your mother

what you choose about this letter.

As for the charges against me, I am

unconcerned. I am beyond their

timid, lying morality, and so I am

beyond caring. You have all my

faith. Your loving father.

CLOSE ON A SHADOWY PHOTO OF KURTZ

The caption "Photo believed to be Col. W. E. Kurtz."

DISSOLVE TO:

EXT. RIVER OUTPOST - DAY

It is a tremendous, tropical rainfall. The PBR pulls in toward an American outpost that is being used as a forward medical evacuation center. Various helicopter pads are seen but only one helicopter-the one painted with the Playboy bunny logo that brought the girls to Hau Phat. The whole area is a mess with mud and debris and looks deserted.

WILLARD

(reacting)

Jesus.

67.

CHIEF

No wonder I couldn't get them on

the radio.

WILLARD

What a dump.

Several soldiers in raincoats come out from a tent as the PBR pulls up.

Hi there!

SOLDIER

WILLARD

How you doing?

SOLDIER

That's a nice little boat you got there. Never seen one up here before.

CHIEF

We called in a request for a medevac. You guys didn't receive it?

SOLDIER

Medevac? No.

CHIEF

We passed a downed Huey with some KIAs.

SOLDIER

On your way here?

Yeah.

CHIEF

SOLDIER

(incredulous)

You going up this river?

Way up.

CHIEF

SOLDIER

Way up river? Forget it.

Why?

CHIEF

68.

SOLDIER

We wanna send some people down

river. Just forget it.

They turn around and start to go back to their tents.

CHEF

(to Willard)

What the fuck was that?

CHIEF

(calling out)

We'll be back in a couple of days.

The soldier looks at him as though he must be crazy.

SOLDIER

Yeah, right, you'll be back.

They return to the tent. Willard steps off the PBR.

Chief?

WILLARD

CHIEF

Yeah, Captain.

WILLARD

See what you can do with that

engine. I'm gonna have a look

around. And don't leave without

me.

He walks up the muddy bank and through the deserted camp. Half of it is blown down. The whole installation has the look of a ghost town. TWO SOLDIERS approach, huddled in their ponchos.

WILLARD (CONT’D)

Hey, solder, where's your C.O.?

SOLDIER

Don't ask me, man.

Willard wanders around the desolate place. Other soldiers pass.

WILLARD

Hey, guys, where's your C.O.?

SOLDIER

He stepped on a land mine about two

months ago. Got all blown to hell.

69.

WILLARD

Who's in charge here?

SOLDIER

Charge? I don't know man. I'm

just the night man. Just doing

what I'm told. I'm just a working

girl.

He just giggles and turns off walking into the mud and rain.

WILLARD

(to other soldier)

What about you, fella?

The other soldier turns around smiling idiotically, and making animal noises. He stumbles off after his friend.

EXT. PBR - BY THE RIVER - DAY

Lance, Chef, and Clean are sitting on the dock surrounded by enormous pile of clothes, boots, all sorts of brand new junk, seemingly abandoned. Chief remains with the boat. Clean is working on Lance's M16.

CLEAN

Lance, man, I'm telling you it's

gonna jam. You mark my words.

LANCE

Get off my back!

Lance, in an unexplainable fit of temper, turns to Clean, jumping on him and pulling him into the mud. Chef, seeing a brawl, jumps into it as well. All wrestle in the mud.

BACK TO WILLARD

He hears a voice.

AGENT

Hey, you! Come here!

Willard turns to see the Hollywood agent from the Hau Phat show under the flap of a large tent, hiding from the rain, waving Willard to come over.

His clothes are the same he wore at the Hau Phat show but wet and dirty. He motions Willard over to him.

AGENT (CONT’D)

Come here. Is that your boat? Come

on inside.

70.

WILLARD

What do you want?

AGENT

Come on inside, I want to talk to

you. Come on. Get out of the

rain.

BACK TO THE CREW IN THE MUD

Rolling around fighting, slapping mud on each other. It's as though there is a lingering madness that infects anyone who visits this place.

CHIEF

Come on, cut the shit. Come on.

BACK TO WILLARD

AND THE AGENT

AGENT

How you doing, Captain? I want you

to meet some people.

CUT TO:

CREW AT THE PBR, STILL FIGHTING IN THE MUD

Willard approaches the group. He looks down at them as they sprawl in the mud.

WILLARD

Hey, guys. Hey, fellas. Guys?

They don't respond, but continue their wild free-for-all in the junk and mud.

WILLARD (CONT’D)

I just made a deal with people from

Hau Phat. I negotiated two barrels

of fuel for a couple of hours with

the bunnies.

They stop fighting instantly. Willard walks toward the boat. The group of them run after him.

CHEF

You shittin' me?

WILLARD

No, I'm not.

(to crew)

Grab a couple of barrels and get up

to that big tent. Come on!

71.

VIEW ON THE CHIEF

He is not jubilant about this news.

CHIEF

Captain. You're giving away fuel for a Playmate of the month?

WILLARD

No. Playmate of the Year, Chief. (he takes a drink from a bottle)

CHIEF

Captain, we get in a fire fight and run out of fuel, I want you to tell me how she was.

WILLARD

I made a deal for all of us, Chief. How about you?

CHIEF

You got some mamas in there?

Some what?

WILLARD

CHIEF

(laughing)

Forget it, Captain. I'll stay with

the boat.

Chief moves to the engine, with Lance's M16.

LANCE

Hey, Captain, give me a hand!

Willard helps Lance with the fuel drum, and they exit, leaving Chief alone on the boat.

EXT. PLAYBOY HELICOPTER - RAIN - DAY

It is still raining. The PLAYBOY HELICOPTER is parked by the river. Our VIEW MOVES CLOSER, and we can make out two figures in the front seat.

CHEF (O.S.)

You know, I got every one of your

pictures...

72.

INT. PLAYBOY HELICOPTER - RAIN - DAY

It is Chef and Terri. He has on his rain gear and is struggling to get it off. Terri is holding a white BIRD in her hands and there are TWO MORE perched on their back seat.

CHEF

I got the centerfold, the

Playmate's Review, the Playmate of

the Year runoff. I even got the

calendar. Hey, oiseau! How come

you got a bird?

TERRI

I used to be the bird girl at Busch

Gardens.

CHEF

Busch Gardens?

TERRI

Yeah, I used to train birds there.

He reacts as he rises, struggling to get off his rain pants.

CHEF

You are Miss December, aren't you?

Miss May.

TERRI

EXT. HOSPITAL UNIT - RAIN - DAY

Lance and Carrie are inside one of the hospital musk units. She is lying back on one of the beds, and Lance is trying to pull her boots off. Carrie's portfolio and pictures are spread around the bed with some of her fan mail.

CARRIE

Is it coming?

BACK TO CHEF

AND CARRIE

CHEF

Miss December has black hair.

TERRI

It's over there.

She points to the back-seat of the Huey, to a black wig on a stand. Chef reacts as he looks at it. She is still preoccupied with the bird.

73.

TERRI (CONT’D)

He's not one of my regular birds.

(to bird)

Come on, baby. Snatch your

cracker. Come here.

BACK TO LANCE

AND CARRIE

Lance is kneeling next to Carrie, starting to make his move. He opens her blouse, exposing her breasts.

CARRIE

Being Playmate of the Year is the

loneliest experience I can imagine.

It's like you try to express your

feelings to someone, and show them

your heart...

BACK TO CHEF

AND TERRI

CHEF

Yeah, I'd love to see your bird

act, but would you mind just

putting this-would you just mind

putting this wig on for me, please?

He picks up the wig from the stand. Terri turns and moves back to the rear seat.

BACK TO LANCE

AND CARRIE

He moves to her makeup case.

CARRIE

...and there's this glass wall

between you, this invisible glass,

and they can see your mouth moving.

BACK TO CHEF

AND TERRI

She is seated next to him in the back-seat of the helicopter. He puts the black wig on her.

TERRI

I used to train birds for at least

two years at Busch Gardens.

CHEF

This was cascading over your

shoulder.

(MORE)

74.

CHEF (CONT'D)

(her blouse)

This was open here.

BACK TO LANCE

AND CARRIE

Lance is putting barrettes in her hair.

CARRIE

...but they can't hear what you're

saying.

BACK TO TERRI

AND CHEF

He has opened her blouse and is trying to position her.

TERRI

...I used to train then to stand on

their head, fly upside down, and

ride little bicycles...

CHEF

Your right hand was over there...

Suddenly Clean appears at the back window of the helicopter, carrying an open black umbrella to shield himself from the rain. He bangs on the window.

Hey, Chef!

CLEAN

CHEF

Get out of there, man!

Clean continues to pound on the side of the helicopter. Chef reacts on the inside.

CHEF (CONT’D)

Later! Later! Give me fifteen

minutes.

BACK TO LANCE

AND CARRIE

Lance puts some of the green makeup on Carrie.

CARRIE

You can never really make them hear

what you're trying to say...

BACK TO CHEF

AND TERRI

75.

Trying to position her.

CHEF

You were kind of bending. Yeah,

your ass was just kind of...

By this time Clean has climbed up on the roof of the helicopter, he leans over and looks in at Chef and Terri through the front window, banging on it with his umbrella.

CHEF (CONT’D)

Hey man, fuck off! Fifteen

minutes!

BACK TO LANCE

AND CARRIE

He is lying her back on the bed.

CARRIE

That's why I tried so desperately

to show somebody that I had some

talent.

BACK TO CHEF

AND TERRI

Chef fixes her shirt.

TERRI

Little baby Macaws. Have you ever

seen a baby Macaw? They're

beautiful.

Clean is now looking in through the window of the door. They react to him.

CHEF

(to Clean)

Come on, man, take off!

CLEAN

I got my rights, man!

BACK TO LANCE

AND CARRIE

He puts more makeup on her, as she continues to talk.

CARRIE

They make you do things that you

don't want to do. Like this

picture here.

76.

She opens the portfolio that she has been hanging on to. We SEE a picture of her in the nude. Lance looks at it and reacts. Then she resumes talking.

CARRIE (CONT’D)

I started feeling repulsed with

myself...

BACK TO CHEF

AND TERRI

CHEF

You were just kind of bending

forward, you ass kind of out.

TERRI

I love training birds...

That's it.

CHEF

TERRI

...I really do.

Chef finally has her posed perfectly.

CHEF

That's it! Viola! Beautiful.

We realize that he was trying to get her to pose exactly as she was in the centerfold of the Playmate of the Year he taped up on the PBR.

CHEF (CONT’D)

You know, I can't believe it. Me,

J. Hicks. I can't believe I'm

really here, you know.

BACK TO LANCE

AND CARRIE

He is caressing her face.

CARRIE

...Maybe I'm unfit to have a

relationship with a beautiful,

innocent boy.

BACK TO CHEF

AND TERRI

77.

CHEF

Just think, if it hadn't been for the Vietnam War, I'd never would've met you, Miss December.

Miss May.

TERRI

BACK TO LANCE

AND CARRIE

CARRIE

I wish I could find just one person

that could share my point of view.

BACK TO CHEF

AND TERRI

They look at each other for a beat, then they both come unglued. He starts stripping the clothes off her, laying her back on the seat, kissing her breasts, etc.

TERRI

You kiss like a bird! Oh, God!

Kiss me!

CHEF

I love birds!

BACK TO LANCE

AND CARRIE

Clean appears at the window. He looks in at them. Carrie turns and sees him, she jumps from the bed, panicked, and moves over by a couple of metal COFFIN containers. Clean bursts into the room as Carrie knocks one of the coffins over. The lid pops open, revealing a NAKED DEAD SOLDIER inside, full of bullet holes. Carrie screams.

BACK TO CHEF

AND TERRI

Making passionate, enthusiastic love.

TERRI

Like a bird! Take me like a bird!

Fly baby! What are you doing?

CHEF

I can fly like an eagle!

78.

TERRI

Like an eagle, baby! Cock it to

me! Oh, you drive me crazy!

BACK TO CARRIE,

LANCE AND CLEAN

Clean is gone. Lance is sitting next to Carrie, comforting her. She is still distraught over seeing the dead body.

CARRIE

Lance, that was somebody's

son...Lance, there were things that

they made me do, that I didn't want

to do. But they said, "Pull the

ribbons between your legs," and I

didn't want to do it. But they

said that was what was expected of

me, that what people wanted to see.

Lance reacts, then kisses her. He starts taking off her blouse. Clean appears at the broken window behind them. He sticks his head in and looks down at them, watching, waiting for his turn. Carrie breaks the embrace and looks up at Clean.

CARRIE (CONT’D)

Who are you?

CLEAN

I'm next, ma'am.

Carrie reacts as we-

CUT TO:

EXT. RIVER - PBR - DAY

The crew are all on the PBR. Clean is at the back attempting to shave. Chef is sitting in back busy cooking up one of his specialties on top of the engine, giving Clean a hard time about the girls. The Chief is at the helm, a little sore at what's happening to his crew.

CHEF

(to Clean)

Well, I didn't know you never got

no pussy!

CLEAN

Shut the fuck up!

79.

CHEF

Sure sorry about that. If I had

known, I would have taken you to

New Orleans. Teach you some of the

moves.

CHIEF

Lay off, Chef!

Willard studies the shadowy photo of Kurtz we saw earlier, as Chef teases Clean in the background.

CHEF

Cherry boy, Cherry boy.

CLEAN

You're fucking dumb!

CHEF

We'll go to New Orleans. I'll get

you fixed up, you prick.

CHIEF

Lay off, Chef.

CLEAN

You're the only prick I see around

here. If I wanna play with a

prick, I'll play with my own.

CHEF

You wouldn't know what to do with

it!

VIEW ON LANCE

Ignoring all this. He is painting his face with brown and green camouflage greasepaint. It is quite ornate-almost psychedelic. He holds a compact in his hand.

CHIEF

Chef, I said lay off! Knock it

off! Give him a break! What do

you think I said? And give your

jaws a rest. And this ain't the

army! You are a sailor. So get

out of that frizzly army-looking

shirt and stop smoking that dope,

you hear me?

He looks back to Lance.

80.

CHIEF (CONT’D)

Lance, what's with all the green

paint?

LANCE

Camouflage.

CHIEF

How's that?

LANCE

So they can't see you. They're

everywhere. Chief.

The Chief reacts...what the hell can he say.

CHIEF

Uh-huh. I want you to stay awake

up there, man. You got a job to

do.

DISSOLVE TO:

EXT. THE PBR - DAY

The Chief steers the PBR up river and around a bend. He sees something ahead, shouts to the crew.

CHIEF

Sampan off the port bow. Sampan

off the port bow. Let's take a

look.

POV VIEW

A SAMPAN, heading down-river,

riding low in the water.

BACK TO PBR

CREW

Everybody on the crew has reacted, as the Chief continues to bark orders.

CHIEF

Lance, bring them in. Clean, on

the 60. Chef, get a 16. Clean,

get on that 60!

Lance jumps up from his hammock, grabs his M16. Clean shuts off his radio, jumps up and moves to the M60 machine gun.

By this time Willard has moved up next to the Chief, wondering what the hell is going on.

81.

WILLARD

What's up, Chief?

CHIEF

A junk boat, Captain. We're gonna

take a routine check.

WILLARD

Let's forget routine now, and let

them go.

CHIEF

These boats are running supplies in

this delta, Captain. I'm gonna

take a look.

WILLARD

Chief, my mission's got priority

here. Hell, you wouldn't even be

in this part of the river, if it

wasn't for me.

CHIEF

Until we reach your destination,

Captain, you're just on for the

ride.

Willard realizes that this is a ploy by the Chief to establish his authority. Nothing is going to stop him.

ANOTHER ANGLE-TO INCLUDE SAMPAN AND PBR

The PBR slides alongside the sampan. THREE NERVOUS VIETNAMESE MEN and ONE YOUNG WOMAN look up from the baskets of rice, mangoes, fish, etc.

CHIEF

All right, come on, let's bring it

over. Look in that forward hooch.

Bring the people out of there.

By this time the third man has crossed forward and joined the others.

CHEF

Hurry up, motherfuckers! Move it!

Can couc!

They hand their ID cards to Chef.

CHIEF

Keep your eyes open, Clean.

82.

CLEAN

(on the machine gun)

I got you Chief.

Willard just sits down, resigned to this show of the Chief's authority.

Chef looks at them and nods his approval. He hands them to Chief.

CHIEF

Board it and search it.

CHEF

There ain't nothing on it, Chief.

CHIEF

Board it and search it.

CHEF

Just baskets and ducks. Bananas.

There ain't nothing on it.

CHIEF

Go on it and search it.

CHEF

Just a goat. Some fish. Bunch of

fucking vegetables.

The Chief finally gets pissed off, he turns and screams at Chef:

CHIEF

Get on that boat!

CHEF

There's nothing on it, man!

CHIEF

Get on that boat!

Chef starts down into the Vietnamese sampan. He is really pissed off. He shoves the Vietnamese men out of the way.

CHEF

(to man)

Move it, asshole.

The Chief watches as Chef goes through the routine of examining the sampan and what it carries. He is very nervous as he looks in all the baskets.

83.

CHEF (CONT’D)

Pigs! Mangoes! What's in the rice

bag? Fucking rice!

CHIEF

Well, look in there, Chef!

CHEF

Fucking fish! More coconuts. Rice.

Here's rice.

CHIEF

What's in that vegetable basket?

Chef moves deeper into the sampan. He looks at the Vietnamese girl that is sitting on a yellow can.

CHEF

(to girl)

Can couc! Come on! Get out of

there.

He grabs her and finally pulls her out of the interior of the cabin. He moves it and starts looking around.

CHIEF

Check that vegetable basket.

All right!

CHEF

One of the Vietnamese men starts to protest.

CLEAN

Shut up, slope!

CHEF

There ain't nothing in here.

CHIEF

What's in the boxes? Look in that

tin can. That rusty can.

CHEF

Just fucking rice, that's all!

There ain't nothing in it!

CHIEF

Check that yellow can. She was

sitting on it. What's in it?

Chef starts for it. All of a sudden, the girl moves. Clean opens up with the M60. She is blown apart, falling back on the deck.

84.

In an instant, THEY ALL OPEN FIRE. One of the Vietnamese men is blown apart into the water, and the others are gunned down in their tracks.

All of them continue to fire their rifles and guns wildly, yelling obscenities. Willard has his .45 out but does not shoot.

CLEAN

Motherfuckers!

CHEF

(weeping)

Let's kill them all!

LANCE

Fucking cocksucker motherfuckers!

Finally the Chief calls out to them.

CHIEF

Hold it! Hold it!

They all stop firing, but Chef, Lance, and Clean are mumbling hysterically.

CHEF

Let's kill all the assholes!

CHIEF

Chef, hold it! Hold it!

CHEF

(hysterically)

...why not?

Clean?

I'm good.

CHIEF

CLEAN

CHIEF

You okay, Lance?

LANCE

Shit! Fuck!

Chef?

CHIEF

Chef has moved to the yellow can that the Vietnamese girl was sitting on. He opens the lid and checks what she had hidden.

85.

CHEF

Look what she was hiding. She what

she was running for?

He reaches inside of the can, and pulls out a PUPPY. They all react.

CHEF (CONT’D)

A fucking puppy! A puppy.

LANCE

Gimme that dog! Gimme that dog!

CHEF

No, you're not gonna get it!

LANCE

Give me the fucking dog, asshole!

Lance grabs the dog from him, kicking Chef back. Chef throws a mango at him.

CHEF

Fuck you! Fucking mango, too! You

want that?

The Vietnamese girl, still alive and bleeding, moves behind Chef.

CHIEF

Chef, she's moving behind you.

She's alive. Check her out.

Chef turns and bends down to her.

CHEF

Come on, Clean, goddamnit, give me

a hand!

Clean jumps down into the sampan. He and Chef pick up the girl and carry her to the edge of the boat.

CHEF (CONT’D)

She's not dead. She's moving.

(to group)

Let's take it easy. Take it easy.

Slow down and take it easy.

CLEAN

Bring her up.

CHIEF

Is she breathing, Chef?

86.

CHEF

She's hurt. She's bleeding.

CHIEF

Bring her onboard. We're taking

her to an ARVN.

ANOTHER ANGLE ON TO INCLUDE WILLARD

Willard looks at the girl and then to Chief.

WILLARD

What are you talking about?

CHIEF

We're taking her to some

friendlies. She's wounded, she's

not dead.

Willard hold his .45. Looks down at Chef nd the girl.

WILLARD

Get out of there, Chef.

CHIEF

The book says, Captain-

Before anybody can react, Willard aims and SHOOTS THE GIRL DEAD with his .45. She falls dead in Chef's arms.

CHEF

Fuck you. Fuck them.

Willard turns and looks at the Chief.

WILLARD

I told you not to stop. Now let's

go.

FADE OUT:

FADE IN:

EXT. THE RIVER - PBR - EVENING

The boat moves up the river.

WILLARD (V.O.)

It was a way we had over here of

living with ourselves. We'd cut

them in half with a machine gun,

and give them a Band-Aid. It was a

lie. And the more I saw of them,

the more I hated liars.

(MORE)

87.

WILLARD (V.O.) (CONT'D)

Those boys were never gonna look at

me the same way again, but I felt

like I knew one or two things about

Kurtz, that weren't in the dossier.

EXT. DO LUNG BRIDGE - THE PBR - RIVER - NIGHT

The boat edges in toward a wrecked bridge in the distance. Along the banks are sandbagged fortifications with the U.S. soldiers. There is a bright fire burning uncontrolled in the distance-in fact there are several-flame and sparks from welding on the bridge momentarily light up the night. There is sporadic gunfire at O.S. snipers, and flares arc through the sky above the bridge.

WILLARD (V.O.)

Do Lung bridge was the last army

outpost on the Nung River. Beyond

it there was only Kurtz.

ANGLE FORWARD - LANCE AND CHEF

CHEF

Hey, Lance, what do you think?

LANCE

It's beautiful.

CHEF

What's the matter with you? You're

acting kind of weird?

LANCE

You know that last tab of acid I

was saving?

Yeah.

CHEF

LANCE

I dropped it.

CHEF

You dropped acid? Far out.

ANOTHER ANGLE

The Chief powers the boat forward,

as Willard and Clean watch in awe.

Everywhere are wrecked boats, parts of jeeps sticking out of the water-a smashed helicopter on the banks. The bridge is in a state of siege. Mortars and rockets arc through the night indiscriminately and rip through the nearby jungle.

88.

Light automatic WEAPON FIRE is HEAD occasionally. The entire scene is lit by Parachute flares.

As the PBR edges forward, SOLDIERS run up through the water, trying to get aboard. One soldier is carrying some luggage and an M16. He splashes into the water, in a mad dash for freedom.

SOLDIER

Take me home! Goddamn you!

CHIEF

Get away from this boat.

SOLDIER #2

You'll get what you deserve!

He and the others are left behind as the PBR continues forward. Willard sees a young LIEUTENANT kneeling on a platform that juts out into the water. He is holding a small strobe light, trying to signal the PBR down. He is holding a large mail bag and a pouch in the other hand.

Willard motions toward the shore. The Chief turns the boat towards the Lieutenant.

CARLSON

Is there a Captain Willard on

board? Captain Willard?

WILLARD

Yeah! Who's that?

As the boat crosses to a stop, Lance swings the spotlight onto the Lieutenant.

CARLSON

Lieutenant Carlson, sir.

(to Lance)

Get that light off me!

Lance swings the light off him, as Willard squats down on the bow of the boat.

CARLSON (CONT’D)

I was sent here from Nah Trang with

these three days ago, sir. Expected

you here a little sooner.

He hands Willard a plastic bag with maximum security markings. Willard takes it-also a mail pouch.

89.

CARLSON (CONT’D)

This is mail for the boat. You don't know how happy this makes me, sir.

Why?

WILLARD

CARLSON

Now I can get out of here, if I can

find a way.

He turns and splashes off into the darkness. Then stops and looks back.

CARLSON (CONT’D)

You're in the asshole of the world,

Captain!

He salutes, then turns and moves away. Willard hops off the side of the boat into the mud, moving up toward the shore.

CHIEF

Captain, where you going?

WILLARD

To see if I can find some fuel and

get some information. Pick me up

on the other side of the bridge.

CHIEF

(to his men)

Somebody go with him.

(to Chef)

Chef.

Chef doesn't move, not wanting to go. No one budges, then Lance volunteers.

LANCE

I'll go. I want to go.

He picks up the puppy and an M16, then jumps over the side onto the shore.

EXT. SHORE - NIGHT

As Willard and Lance walk across an open area, they are lit by the battle in the background. Lance looks up and around the embankment and along a barbed wire on the edge of the road. SHELLS SCREAM overhead. Lance just stands looking down on the phantasmagoric strings of lights, the smoke, the fires.

90.

Willard jumps down into a trench. We SEE a SOLDIER crouched, holding his buddy, who is crying uncontrollably.

WILLARD

Where can I find the C.O.?

SOLDIER

You can right to it, son of a

bitch!

WILLARD

Lance! Get down here!

Lance is still reacting to the pyrotechnics around him. He turns and jumps down into the trench.

WILLARD (CONT’D)

You still got a commanding officer

her?

SOLDIER

Beverly Hills.

What?

WILLARD

SOLDIER

Right up the road there's a

concrete bunker called Beverly

Hills. Where the fuck else do you

think it would be?

Willard turns and moves away from the two soldiers. Lance follows.

The CAMERA FOLLOWS them as they proceed down the long trench. They pass a group of black G.I.s. Suddenly Willard trips over a body, and falls right into a mud puddle. The body stirs.

SOLDIER (CONT’D)

You stepped in my face!

LANCE

We thought you were dead.

SOLDIER

Well, you thought wrong, damnit!

They come to another gun emplacement, where two BACK SOLDIERS are at a fifty-caliber machine gun. The GUNNERS blast away into the night, walking and swearing at Vietcong. The SPOTTER is feeding the bullets into the gun. Psychedelic guitar music plays on a portable radio.

91.

GUNNER

(to enemy)

I told you to stop fucking with me!

You think you're so bad, huh,

nigga?

Willard watches for a while, then shouts over to him.

WILLARD

What are you shooting at, soldier?

GUNNER

Gooks! What the fuck do you think

I'm shooting at?

(turns and sees it's an

officer)

I'm sorry, sir. There are gooks

out there by the wire. But I think

I killed them all.

SPOTTER

You ain't shot shit! Listen!

The enemy's yelling continues.

GUNNER

Oh, shit, he's trying to call his

friends. Sen up a flare.

The spotter reaches over and picks up a flare pistol, and fires a FLARE into the air. The gunner starts blasting away again,

GUNNER (CONT’D)

You think you so bad, nigga? You

think you so bad?

He stops firing. The yelling continues.

SPOTTER

They're all dead, stupid. There's

one still alive underneath them

bodies.

WILLARD

Who's the commanding officer here?

GUNNER

Ain't you?

(to enemy)

You think you so bad? I got

something for your ass! I got

something for you now!

92.

Lance climbs up on top of the sandbags with the puppy and looks at the pyrotechnics. Explosions go off all around him...space city.

SPOTTER

There's nothing but bodies, man!

GUNNER

(to spotter)

Go get the Roach, man. Go get the

Roach, nigga!

The spotter moves down the trench, to where a tall lanky black soldier wearing all sorts of beads and trinkets leans against the ditch, sleeping.

SPOTTER

(calling out)

Roach! Roach!

THE ROACH gets up somewhat annoyed, but very cool, and saunters up toward the machine gun. Willard looks over and sees Lance up on top of the sandbags.

Lance!

WILLARD

Lance climbs down back into the trench. The Roach and spotter move back to the machine gun, where the gunner waits. The Roach turns off the radio, sits down, and listens.

SPOTTER

Do you hear them? Well, bust them!

VIETCONG (O.S.)

Hey, G.I., fuck you!

GUNNER

You hear him out there on the wire,

man?

Yeah.

ROACH

VIETCONG (O.S.)

Fuck you, you G.I.

GUNNER

You need a flare?

93.

ROACH

No.

(listens)

He's close, man. He's real close.

VIETCONG (O.S.)

G.I., fuck you!

The Roach opens the breech of his shotgun-like weapon, plunks a big slug into it. He snaps it closed, then turns and wraps the strap around his arm. He points the weapon up into the air listens to the YELLING, calculating, then fires. The grenade whistles off into the night. There is a sharp EXPLOSION that cuts off the scream. Then the thud of bodies.

ROACH

Motherfucker.

WILLARD

Hey, soldier. Do you know who's in

command here?

Yeah.

ROACH

He turns and walks away.

CUT TO:

FULL SHOT - PBR - BRIDGE - NIGHT

The PBR stands in the shadows. Chef, the Chief, and Clean are waiting for Willard and Lance. SHELLS WHISTLE BY and CRASH in the distance as the welding continues on the bridge.

Clean looks up and sees a direct hit on the bridge. TWO SOLDIERS ate blown off some of the towers and into the water.

CLEAN

Holy shit! Yo, Chief, two guys

just got blown off that bridge,

CHIEF

You hand on, man. You're gonna be

okay.

Clean turns and moves to the bow, where Chef is kneeling by the mail bag.

CLEAN

What's that?

94.

Mail, man!

CHEF

CHIEF

Later on the mail! Watch them

trees.

Willard and Lance climb back onto the boat, loaded down with supplies. They move down into the PBR.

WILLARD

There's no diesel fuel, but I

picked up some ammo. Let's move

out.

CHIEF

Did you find the C.O., Captain?

WILLARD

There's no fucking C.O. here. Let's

just get going.

CHIEF

Which way, Captain?

WILLARD

You know which way, Chief.

He takes off his shirt, then his T-shirt.

CHEF

You're on your own, Captain. Still

want to go on? Like this bridge.

We build it every night, Charlie

blows it right back up again, just

so the generals can say the road's

open. Think about it...who cares?

WILLARD

Just get us up river!

CHIEF

Chef. On the bow.

(to Clean)

Stand by, Clean.

FULL VIEW - THE PBR - NIGHT

The men on the bridge continue to weld with their torches as the PBR backs up, then the Chief pulls away from the bridge.

95.

They all look back in the distance, the hills flash with charges, there is a fiery glow, the concussion of heavy explosions, as the BRIDGE BLOWS.

DISSOLVE TO:

EXT. THE PBR - DAY

It is the next morning. The PBR continues on its journey up river. Chef distributes mail from the mail bag.

CHEF

Shit, you got another one, Clean!

CLEAN

No shit. Wait a minute. Is that

it?

CHEF

That's it for you. Lance? Mr. L.

B. Johnson, there you go.

Lance takes the letter.

LANCE

Far out, man! All right, I been

waiting for this one.

CHEF

(to all)

I got another one. I got a box

from Eva.

LANCE

(reading)

"Lance, I'm fine. Sue and I went

tripping in Disneyland. Sue

skinned her knee.

CHEF

Man, I'm gonna get back to

Antoine's.

LANCE

(to letter)

How could I fucking forget, man?

Beautiful!

(reading)

"There could never be a place like

Disneyland, or could there? Let me

know."

(looking around)

Jim, it's here. It really is here.

96.

Willard has opened the Top Secret pouch and is reading the letter inside:

WILLARD (V.O.)

(reading)

"There has been a new development

regarding your mission, which we

must one communicate to you.

Months ago, a man was ordered on a

mission, which was identical to

yours. We have reason to believe

that he is now operating with

Colonel Kurtz. Saigon was carrying

him MIA for his family's sake, but

they assumed he was dead. Then

they intercepted a letter he tried

to send to his wife."

INSERT - CLOSE ON THE COPY OF THE LETTER

"Find someone else. Forget it. I'm never coming back."

WILLARD (V.O.)

Captain Richard Colby. He was with

Kurtz.

LANCE

(to himself)

Disneyland. Fuck, man, this is

better than Disneyland.

CHEF

(reading newspaper)

"...Charles Miller Manson ordered

the slaughter of all in the home

anyway, as a symbol of protest."

That's really weird, ain't it?

Lance has taken some SMOKE BOMBS and is popping them open. COLORED SMOKE begins to pour out.

LANCE

Purple Haze! Look!

CHIEF

Lance, put that smoke away.

CLEAN

I got a tape from my mom.

Lance is playing with the smoking flares.

97.

LANCE

Chief, rainbow reality, man. Get a

good whiff.

CHEF

Eva can't picture me in Vietnam.

She pictures me at home, having a

beer, watching TV.

The colored smoke is getting in everybody's eyes. The whole boat is enveloped.

CLEAN

Hey, Lance, man!

LANCE

(to himself)

Hot potato! Hot potato

CHEF

Eve's not sure she can have a

relationship with me. Here I am,

thirteen thousand fucking miles

away, trying to keep a relationship

with my ass.

Clean's tape from his mom is PLAYING.

CLEAN'S MOTHER (INTO RECORDER)

"...and that's much more that I can

say for some of your friends. If

this tape is any good, I will have

Dad and the family send you a tape

of their own.

SUDDENLY streams of TRACERS whip out of the jungle at them, other bullets smash and ricochet off the deck; glass shatters, everybody jumps to their battle stations.

Lance jumps into the turret of the twin fifties and starts blasting away at the jungle. The Chief tries to power the PBR out of the ambush. Clean jumps up behind the M60 machine gun and starts firing. Willard uses his M16.

Everything is confusion, yelling, gunfire, the thud of bullets ripping into the PBR fiberglass hull. Lance's guns return fire. He screams obscenities as he vents an almost superhuman violence.

MED. CLOSE SHOT - LANCE - FIRING HIS GUNS

Turning in the turret; bullets smash and explode around him. Nobody quite knows where the fire is coming from.

98.

VIEW ON THE CHIEF

The Chief steers and accelerates erratically, trying to dodge the fire fight.

VIEW ON CLEAN FIRING HIS GUN

Firing the M60...suddenly it jams. As he rises up behind the shield he is riddled by machine gun fire. The bullets blast into his throat, chest, stomach...he falls to the deck.

Nobody has seen that he is down yet. They keep firing their guns into the jungle. The Chief throttles forward, the boat surges ahead and slams across the river. It is all over quickly.

The Chief turns and sees that Clean has been hit and is down on the deck.

CHIEF

Chef! Take care of Clean!

Captain, Clean's hit! He's hit!

Lance climbs out of the gun turret and looks around for the little puppy.

LANCE

Where'd the dog go? Where's the

dog? We gotta go back and get the

dog!

Chef crawls to Clean and turns him over. Sees that he is dead.

CHEF

Clean! Hey! Bubber, you can't

die! You fucker! Hey, bubber!

CLEAN'S MOTHER (INTO RECORDER)

"I'll have a lot of grandchildren

to love and spoil, and then when

your wife gets them back, she's be

mad with me. Even Aunt Jessie and

Mama will come to celebrate your

coming home. Granny and Dad are

trying to get enough money to get

you a car. But don't tell them,

because that's our secret.

Anyhow..."

Clean lying dead, flat on his back. Chief turns him over and holds his wrist to try and take his pulse.

99.

CLEAN'S MOTHER (INTO RECORDER)

(CONT’D)

"...do the right thing, stay out of

the way of the bullets, and bring

your hiney home ask in one

piece...'cause we love you very

much. Love, Mom."

Chief is holding Clean's hand and crying.

DISSOLVE TO:

EXT. RIVER - PBR - DAY

The boat under power, moving through fog. They pass downed jets, wreckage, burning fires. Willard is sitting on the bow, looking out into the distance as though he sees something.

WILLARD

(motions to Chief)

Hold on. Throw me the glasses.

He looks through the binoculars.

WILLARD'S P.O.V. - WRECKED FRENCH PLANTATION - DAY

In the distance, we can make out a PLANTATION. The dock has been devastated by years of fighting. There is a heavy FOG or MIST everywhere. Up on the hill above the dock sits a large house; it does not look heavily damaged.

EXT. RIVER - THE PBR - DAY

Willard picks up his M16 and moves to the front of the boat. Chief has also seen the wrecked plantation.

CHIEF

Lance. Get the 16 on the bow.

(to Chef)

Chef, on the 60.

The Chief pulls the PBR slowly up to the wrecked dock. Willard jumps off with his M16 in hand and cautiously looks around.

He walks into a wrecked barn. He comes out of the side and makes his way back to Chef and Lance, who are standing on the dock.

CHIEF (CONT’D)

Lance, cover the Captain.

Suddenly from out of the fog...FRENCH VOICES shout out.

100.

LAFAVRE

You are surrounded. Return. Drop

your weapons.

CHEF

(in French)

Don't shoot! Don't shoot!

(to Lance and others)

They're French.

(n French, to soldiers)

I am dropping my weapon!

Chef and Lance start to put down their M16s, the Chief shouts out furiously from the boat.

CHIEF

Chef! Pick up that weapon! Pick

it up! Stand fast!

Chef continues to shout to the French.

CHEF

We are Americans! We are friends.

LAFAVRE

Drop your weapons!

As Willard walks down the dock, French soldiers appear out of the fog, totally surrounding them. Willard stops in front of them, realizing there is no way out, and raises his rifle in surrender .

CHIEF

(to Lance and Chef)

All right, you men. Put down your

weapons.

They all drop their weapons. More soldiers step out.

CHEF

(in French)

We are Americans. We are friends.

We are friends.

We SEE more French and Cambodian soldiers as they step out of the fog onto the dock. They move forward cautiously. It is strange. It is like meeting up with a group of soldiers from the French Indo-Chinese War. It's as though they've stepped into 1954. The soldiers are still wearing parts of the red berets of their particular unit that fought against the Viet Minh. There are also Vietnamese who serve the French and who fought with the French. They all bear older automatic weapons and suspicion in their eyes.

101.

Another Frenchman joins the group. This is obviously the patriarch of the family. HUBERT DEMARAIS is about fifty, with a dignity and strength about him. He and Willard look at each other.

WILLARD

We lost one of our men.

DEMARAIS

We French always pay respect to the

dead of our allies. You're all

welcome.

(pause)

Y name is Hubert DeMarais. This is

my family's plantation. It has

been such for seventy years, and it

will be such until we are all dead.

DISSOLVE TO:

EXT. GRAVEYARD - DOLLY SHOT - DAY

The group is assembled. There is a platoon of Cambodian soldiers standing by an open grave, SERGEANT LAFAVRE in front of them.

LAFAVRE

To my command! Attention! Weapons

on the shoulder! Present weapons!

The platoon present their weapons, as Clean's body is carried toward the grave. The bugler brings the bugle up to his lips and plays "Taps."

Willard looks up and sees something on the balcony of the house.

HIS P.O.V:

A young WOMAN, dressed in white, is on the balcony. She has been watching the ceremony. She turns back into the house.

The Chief bends down and picks up the tattered American flag, which is on Clean's body. Lance places Clean's tape recorder on the body. The body is lowered into the grave.

CHIEF

(to Willard)

Captain, accept the flag of Tyrone

Miller, on behalf of a grateful

nation.

He hands the folded flag to Willard.

102.

INT. DINING ROOM - GROUP - NIGHT

We SEE the MeMarais interior. They have set up a table for the crew, and with some of their own enlisted men. The table is headed by Sergeant LaFavre, who is already seriously into the wine.

A waiter comes to the table and stops next to Chef. He is holding a plate full of chicken, etc. Chef's face lights up as he regards the wonderful European-style food.

CHEF

This food is really wonderful,

isn't it? The wine, the sauces. I

can't believe it. Can I speak with

the chef?

LAFAVRE

The chef speaks only Vietnamese.

CHEF

No kidding. He cooks like this and

he can't even speak French?

(to Lance)

Hey, Lance, the chef's a slope.

Lance has been loading up on food from the waiter's plate. As the waiter moves away from him, Lance reaches across the table for the bread and accidentally knocks over a glass.

CHIEF

Hey, Lance...

Lance realizes he is eating like an animal, sits back down. The VIEW MOVES ALONG THE TABLE AND REVEALS that on a higher

level there is a more elaborate table set, where the DeMarais family is dining with Willard.

Willard is sitting next to DeMarais, who is at the head of the table. Christian, ANNE-MARIE, and old blind UNCLE, Claudine, the TUTOR, and Philippe are all seated, listening to one of the grandchildren, who is reciting a poem. The other grandchildren stand nearby listening.

The child stumbles through the poem.

DEMARAIS

(in French)

You still need to study with Mr.

Robert. Let's go. Not too bad. Go

to bed everyone now.

103.

The children kiss their parents good night, and run out of the room. DeMarais turns to Willard.

DEMARAIS (CONT’D)

This is Baudelaire. It is a very

cruel poem for children, but they

need it, because life sometime is

very cruel.

He reaches behind him and picks up a plaque, hands it to Willard.

DEMARAIS (CONT’D)

As you can see. Attack repels by

the family.

PHILIPPE

Just for this war

DEMARAIS

(pointing to the plaque)

Vietcong, fifty-eight. North

Vietnamese, twelve. South

Vietnamese, eleven.

WILLARD

Americans, six?

DEMARAIS

Yes, well, there were perhaps

mistakes.

Willard hands the plaque back to Demarais, who hands if off to Philippe.

ANOTHER ANGLE TO INCLUDE ROXANNE

The young woman we saw earlier, ROXANNE, has come down the stairs and moves into the dining Room. DeMarais looks up and sees her.

DEMARAIS

(in French)

Roxanne, you were curious to see

these Americans, weren't you?

ROXANNE

(in French)

No, I was only hungry.

She stops in front of an empty chair next to Philippe. Willard rises to greet her.

104.

DEMARAIS

May I present Captain Willard, he

is of a Paratroop regiment. Madame Sarrault.

She smiles and indicates for Willard to sit down.

Captain.

ROXANNE

She sits down. There is an uneasy silence. She laughs slightly.

ROXANNE (CONT’D)

(in French)

"An angel passes..."

DeMarais reacts.

DEMARAIS

(in French)

"...Let's butcher it!" Do you

remember this story in Paris, when

the baron said, "Let's cut the

angel?"

ROXANNE

(in French)

I don't think that is the subject

tonight.

DEMARAIS

I'm sorry, Captain. It was just a

little story. And people starving

during the war. They are all

around the table, and there was a

silence, somebody say "An angel is

passing by." So somebody say "Let's

eat it!"

(laughs)

WILLARD

How long can you possibly stay

here?

DEMARAIS

We stay forever.

WILLARD

No, no, I mean, why don't you go

back home to France?

DEMARAIS

This is our home, Captain.

105.

WILLARD

Sooner or later, you're --

No!

DEMARAIS

Roxanne interrupts, saying something to him in French. He silences her.

DEMARAIS (CONT’D)

(to Willard)

You don't understand our mentality!

The French officer mentality! At

first, we lose in Second World War.

I don't say that you Americans win,

but we lose.

Oh, Papa.

CLAUDINE

DeMarais is starting to get heated up.

DEMARAIS

When I speak, you shut up!

(to Willard)

In Dine Bien Phu, we lose! In

Algeria, we lose! In Indochina, we

lose. But here, we don't lose!

This piece of earth, we keep it! We

will never lose it! Never!

The OLD BLIND UNCLE at the other end of the table speaks, as Claudine cuts his food for him and feeds him.

OLD UNCLE

And now you take French place, and

the Viet Minh fight you. And what

can you do? Nothing. Absolutely

nothing.

DEMARAIS

The Vietnamese are very

intelligent. You never know what

they think. The Russian ones who

help them, "Come and give us their

money, we are all Communists.

Chinese, come and give us guns.

We're all brothers." They hate the

Chinese! Maybe they hate the

American less that the Russian and

the Chinese. If tomorrow the

Vietnamese are Communists, they

will be Vietnamese Communists.

(MORE)

106.

DEMARAIS (CONT'D)

And this is something that you will

never understand, you American.

OLD UNCLE

I don't know. Maybe in the future

we can make something with the Viet

Minh.

PHILIPPE

Don't you understand? The V.C.

say, "Go away! Go away!" That's

finish for all the white people in

Indochina. If you're French,

American, that's all the same.

"Go!" They want to forget you.

Look, Captain --

He rises from the table.

DEMARAIS

Come on, Philippe. It's enough

now.

Philippe goes and picks up an egg from the basket, returns to the table.

PHILIPPE

Look, this is the truth...

He breaks the egg in his hand, the contents dribble out.

PHILIPPE (CONT’D)

An egg, the white leaves, but the

yellow stays!

He turns and walks away.

DEMARAIS

(in French)

Come on, stay with us. What's

going on?

PHILIPPE

(calling back)

They don't want to face the truth.

He points to the dining room, turns and exits, LaFavre, playing his accordion, walks toward the dining room.

CHRISTIAN

When I was in Saigon, I spoke to an

American politician, and he

explained it very well.

(MORE)

107.

CHRISTIAN (CONT'D)

He said, "Look, Yesterday it was Korea, today Vietnam, tomorrow

Thailand, the Philippines, then

maybe Europe."

LaFavre enters, playing the accordion.

CHRISTIAN (CONT’D)

Come on, why not Europe? Look what happened in Czechoslovakia recently. And even before the Second World War, the Americans knew exactly what was going on! They don't want that shit to take over!

(to LaFavre, who is

playing the accordion)

LaFavre! LaFavre, stop it!

LAFAVRE

All you white people are shit.

CHRISTIAN

They are fighting. Fighting for freedom.

LAFAVRE

Freedom? Bullshit. French

bullshit. American bullshit.

(to all)

Dine Bien Phu, that's serious! All soldier know they are already dead.

(to Willard)

You know anything about Dine Bien Phu?

WILLARD

Yeah, I know.

DEMARAIS

No, you don't. Not really.

TUTOR

A milliary mistake.

DEMARAIS

A mistake? A voluntary mistake! Voluntary!

LAFAVRE

All the soldiers knew, we knew we would be dead.

108.

DEMARAIS

The generals and the colonels

believe it's impossible for the

Viets to get the cannon up there in

the mountain. But they do. Then

they wait for the rain to come.

When it comes, no airplane can fly

there, and our paratroopers jump at

ninety meters! I mean, you know,

ninety meters! Seventy meters!

That's crazy! Nobody in the world

can do that! And they only do that

to be dead with their friends.

LaFavre starts playing "The Star Spangled Banner!

DEMARAIS (CONT’D)

The French Army sacrificed.

Sacrificed by politicians safe at

home. They put the army in an

impossible situation where they

couldn't win!

TUTOR

You exaggerate.

DEMARAIS

The students are marching in Paris,

protesting, demonstrating. They

stab the soldiers in their back!

The soldier would open a grenade,

it wouldn't work. A piece of paper

would fall, "Union of the French

Woman." "We are all for the Viets."

Traitors! Communist traitors at

home!

LAFAVRE

Dine Bien Phu, okay. The French is

shit. No one care. No one want to-

-

CHRISTIAN

You are bothering me, LaFavre!

(to Willard)

Why don't you Americans learn from

us, from our mistakes? My God,

with your army, your strength, your

power...you could win if you wanted

to!

As LaFavre leaves, he falls down some steps that lead out of the dining room.

109.

DEMARAIS

(in French; to Christian)

Be kind and help this poor LaFavre

who fell, please.

CHRISTIAN

(to Willard)

You can win!

He rises and goes to help the sergeant. As they leave, his wife Anne-Marie sits there nervously, then rises, excusing herself.

OLD UNCLE

You know, I'm sure we can make

something here. I'm sure about it,

you know? I never do something

wrong to the people here.

TUTOR

That's right, but the Communists at

home have never been traitors.

DEMARAIS

No, never traitors. For me, Mendes-

France was a Communist.

TUTOR

Mendes-France was a Socialist.

DEMARAIS

He was Communist! That's it!

They get into an argument in French. The others look at each other, at Willard, as the argument continues.

Socialist.

TUTOR

DEMARAIS

How do you want the government to win when it is Communist?

TUTOR

Communists have always worked for peace wherever they are.

DEMARAIS

They killed the French Army, which was the strongest. Destroyed because of who? The Communists.

110.

TUTOR

The army damaged itself by its attitude toward the people here.

DEMARAIS

And why do you think that it did that? Because it understood it had been sacrificed by the Communist government.

Socialist.

Communist.

TUTOR

DEMARAIS

TUTOR

Captain, good night.

The tutor gets up and starts to walk out...gives Demarais one more shot.

TUTOR (CONT’D)

(to DeMarais)

Mendes-France was a Socialist.

He leaves.

OLD UNCLE

We can stay. I know we can stay.

You know, we always helped the

people, we work with the people.

The old man continues babbling, as Claudine helps him up.

CLAUDINE

Come on, we are leaving.

OLD UNCLE

So we can be friends, we are

agreed.

The exit, Claudine consoling him. Now only Roxanne, Willard, and DeMarais are at the table.

DEMARAIS

See, Captain, when my grandfather

and my uncle's father came here,

there was nothing. Nothing. The

Vietnamese were nothing. So we

worked hard, very hard, and brought

the rubber from Brazil, and then

plant it here.

(MORE)

111.

DEMARAIS (CONT'D)

We took the Vietnamese, work with

them, make something, something out

of nothing. So when you ask me why

we want to stay here, Captain, we

want to stay here because it's

ours, it belongs to us. It keeps

out family together. We fight for

that! While you Americans, you are

fighting for the biggest nothing in

history. I'm sorry Captain. I

will see if your men needs any help

to repair your boat, so that you

can go on with your war. Good

night, Roxanne.

He rises from the table and moves out of the room. Willard and Roxanne are left alone at the table.

ROXANNE

I apologize for my family, Captain.

We have all loots much here.

1. ubert- his wife and two sons. And
2. have lost a husband.

WILLARD

I understand.

ROXANNE

You are tired of the war. I can

see it in your face. It was the

same in the eyes of the soldiers of

our war. We called them "Les

Soldat Perdus." The Lost Soldiers

(a beat)

If you like we can have some

cognac.

She rises and moves to the living room.

WILLARD

No, I have to see about my men

and...

Roxanne stops at the bottom of the stairs. She turns to look at him.

ROXANNE

The war will still be here

tomorrow.

WILLARD

Yeah, I guess you're right.

112.

He rises and walks down into the living room. Roxanne moves toward a table full of liquor bottles.

ROXANNE

I noticed you had no wine at

dinner.

She begins to pour cognac into a glass.

WILLARD

No, I don't drink wine. I do like

cognac, but I don't want any now,

thank you.

ROXANNE

Well, then I must drink alone,.

Then.

She picks up her glass of cognac, and walks by Willard out onto the terrace. Stops and looks back at him.

ROXANNE (CONT’D)

Will you go back after the war to

America?

No.

WILLARD

ROXANNE

Then you're like us, your home is

here.

She walks farther out onto the terrace, sits down on a sofa, with her back to the river below. Willard follows her and stands next to her at the railing. We can SEE men working on the PBR down below at the dock.

ROXANNE (CONT’D)

Do you know why you can never step

into the same river twice?

WILLARD

Yeah. Because it's always moving.

DISSOLVE TO:

INT. ROXANNE'S BEDROOM - NIGHT

Our VIEW starts CLOSE ON Roxanne's hands. She is holding a long opium pipe. In the other hand she holds a long tamper with some opium on the end. She handles it expertly over a small lamp with open flame, heating it, then putting the bead of opium into the pipe.

113.

ROXANNE

I used to prepare a pipe for my

husband. It was morphine he took

for the wounds he suffered in his

heart.

She looks over at Willard. They are both lying on her bed, next to each other.

ROXANNE (CONT’D)

He would rage and he would cry, my

lost soldier. And I said to him,

"There are two of you, don't you

see? One that kills and one that

loves." And he said to me, "I don't

know whether I am animal or a god."

But you are both.

She offers him the pipe, he takes it and inhales the smoke from the opium, gives it back to her. She smokes also.

ROXANNE (CONT’D)

You want more?

He shakes his head.

ROXANNE (CONT’D)

All that matters is that you are

alive. You are alive, Captain.

That's the truth.

She gets up from the bed, unties one of the strings of the bed canopy, and takes off her robe, revealing her naked body. She walks around the bed, untying the other strings. She approaches him. He reaches up to her.

ROXANNE (CONT’D)

There are two of you, don't you

see? One that kills...and one that

loves.

DISSOLVE TO:

EXT. RIVER - PBR - DAY

Mist swells up around the river as the boat moves into an obscure FOG. Willard is up front on the bow, trying to see what's ahead. The Chief is at the helm.

ED. CLOSE SHOT - THE CHIEF

We catch a glimpse of him, even though we are in the fog, he can't see a thing. Finally he shuts down the engine and they coast.

114.

CHIEF

Can't see nothing. We're stopping.

Willard jumps up and moves to the Chief.

WILLARD

You're not authorized to stop this

boat, Chief.

CHIEF

I said I can't see a thing,

Captain! I'm stopping this boat! I

ain't risking no more lives!

WILLARD

I'm in command here, goddamnit.

You'll do what I say!

CHIEF

(to Chef)

You see anything, Chef?

Chef is at the back of the boat behind the M50. He searches the banks.

CHEF

Why don't they fucking attack, man?

ANGLE ON LANCE

His head back, wailing eerily.

CHEF

Watch it over there, Chief. Got a

stump.

CHIEF

Lance, on the fifties.

ANGLE ON THE PBR

We catch glimpses through the moving FOG, all of the men on the PBR, at their guns, searching the shoreline.

WILLARD (V.O.)

He was close. He was real close. I

couldn't see him yet, but I could

feel him, as if the boat were being

sucked up river and the water was

flowing back into the jungle.

Whatever was going to happen, it

wasn't going to be the way they

called it back in Nah Trang.

115.

SUDDENLY the air is filled with arrows, an avalanche of arrows in the sky. They come down clattering on the deck. Chef opens fire.

Arrows!

WILLARD

CHIEF

Fire! Chef, open fire! Fire!

Lance! Fire!

ANOTHER ANGLE - ARROWS

Arrows everywhere, primitive spears flung expertly.

ANGEL ON LANCE

In the front turret, arrows whiz around him. He turns, smiles, picks one up, looks at it, breaks it in half.

ANGLE ON THE CHEF

Frightened, but almost heroic, firing his weapon and shouting obscenities at the weird, dancing heathens attacking him. Arrows fall harmlessly around him.

HIGH ANGLE - THE SKY

Thousands of arrows in the sky come clattering down on the deck by the Chief.

ANGLE TO GO WITH WILLARD

Amazed...immediately he knows they're harmless, done more to frighten than to injure. But still, he's never seen anything like this in all his time in Vietnam, and he knows in his gut that it is still another message from Kurtz. He moves to Chef, tries to make him stop firing.

WILLARD

Chef! Chef, it's okay! Quit

firing! They're just little

arrows. Cut it out! Quiet! Chief,

tell them to hold their fire!

They're just little sticks!

They're trying to scare us!

The Chief picks up his M16 and turns to Willard wildly.

CHIEF

You got us in this mess, and now

you can't get us out, because you

don't know where the hell you're

going, do you?

(MORE)

116.

CHIEF (CONT'D)

(no answer)

Do you? You son of a bitch! You

bastard!

The Chief leaves the wheel of the PBR and steps up on the deck with his M16.

WILLARD

(to Lance)

Lance, get the wheel!

Lance moves to take over the wheel, as Chief starts firing his M16 madly.

CHIEF

You savages! Come and get it, you

son of a bitches!

He drops the M16, moves to the M60 machine gun and starts firing madly again.

Suddenly the Chief stops short, puzzled, a small droplet of blood lines his mouth. He coughs up a mouthful of blood, then looks down. The head of a SPEAR has gone through his chest. He looks up at Willard.

A spear?

CHIEF (CONT’D)

He remains looking directly into Willard's eyes, then starts to fall. Willard catches him, and is pulled down to the deck by the weight of the Chief's body. The Chief looks up at him and suddenly reaches his hands for Willard's throat, trying to pull Willard down on top of the spearhead, trying to skewer him, and pull him along with him to death. A beat as they struggle, then suddenly the Chief DIES.

EXT. RIVER - THE PBR - DAY

Lance is putting camouflage paint on the Chief.

Willard has jumped off the boat with all of his gear. Chef looks down at him.

WILLARD

My mission is to make it up to

Cambodia. There's a Green Beret

colonel up there who's gone insane,

and I'm supposed to kill him.

CHEF

That's fucking typical! Shit!

Fucking Vietnam mission!

(MORE)

117.

CHEF (CONT'D)

I'm short and we gotta go up there

so you can kill one of our own

guys? That's fucking great! That's

just fucking great, man! Shit!

That's fucking crazy! I thought

you were going to blow up a bridge,

or some fucking railroad tracks, or

something!

Lance has pulled the Chief's body into the river, and jumped in himself. Willard and Chef watches him, as he tries to bury Chief's body in the water.

Willard turns to leave.

WILLARD

That's all right.

CHEF

No, wait. We'll go together. On

the boat. We'll go with you. We'll

go out there. But on the boat,

okay?

Lance gently floats Chief off downstream. We SEE the Chief's body slowly disappear.

EXT. RIVER - PBR - NIGHT

The PBR moves up-river. The shore is lit up with burning torches and a large wooden structure in flames. We SEE the faces of the remaining crew, as they take in this sight.

DISSOLVE TO:

EXT. RIVER - THE PBR - DAY

The boat passes rows of skulls, flaming torches, men impaled on poles, etc.

WILLARD (V.O.)

Part of me was afraid of what I

would find, and what I would do

when I got there. I knew the

risks. Or imagined I knew. But the

thing I felt the most, much

stringer than fear, was the desire

to confront him.

Lance is at the back of the boat, moving in a slow-motion Tai Chi.

DISSOLVE TO:

118.

EXT. RIVER - PBR - DAY

The PBR is slowly moving TOWARD CAMERA. Lance and Willard are standing on the bow of the boat. Chef is at the helm. The men stare forward in amazement. Willard has the binoculars around his neck. He brings them up to his eyes and looks.

WILLARD

(to Chef)

Just keep moving.

(to Lance)

Lance, keep your hands away from

the guns.

OUR VIEW MOVES slowly behind them and we SEE that they see. Hundreds of Montagnard natives, body and faces painted

white, of the most savage nature, but there is a purity about them. Men and boys stand passively on canoes side by side, blocking the river.

There are also hundreds of other NATIVES lining the shore on both sides, dressed in most ornate and primitive manner, in feathers, parts of birds and animals. Fires and dead bodies are everywhere.

OUR VIEW MOVES

Behind the PBR, closer and closer to this fantastic human wall blocking them. The natives accept the PBR, allowing it to pass into them with a sort of inevitability.

VIEW ON WILLARD, LANCE AND CHEF

Reacting as they pass through the natives on canoes, then look up toward the bask.

WHAT THEY SEE:

The temple. A magnificent fortified encampment built around the ruins of a former Cambodian civilization.

NEW ANGLE - FULL VIEW BEHIND THE PBR AS IT PROCEEDS

The scale of this thing is enormous. Great enigmatic Cambodian faces carved out of stone from thousands of years ago. The fortress reaches out across the river where part of its ruins still stand on the opposite side nod on a small island. It's as though the river flowed into the great rams of the sphinx-like temple. Aligning the fortifications are concertina wire, automatic weapons emplacements. There is even wreckage of Hueys as armed machine gun nests.

119.

It is a strange combination of the very modern and the very primitive. In this installation, WE SEE LIVING families, fires, nomadic dwellings, several HUNDRED of the most primitive MOTAGNARDS that ever existed. Some carry spears, occasionally other emerge from the jungle, scurrying around with the activity that the arrival of a stranger brings. The air is heavy with the weight of hundreds of AUTOMATIC WEAPONS. A think greasy smoke hangs from fires that burn and around the fort. Fresh shell craters indicate a recent battle. Near the dock, and everywhere else, there are tangled piles of corpses, half- submerged in the water, piles of bodies of the dead.

As the PBR moves up, a HEAD suddenly is thrust into VIEW. The heads is that of a particularly wild, long-haired, stubble-faced MAN. He has three or four camera bodies around his neck; a large bag stuffed with lenses and film. He is dressed in rags and tatters. He shouts out.

PHOTOGRAPHER

It's all right! It's all right!

It's been approved!

The PBR moves slowly toward the steps, as the man continues to shout out.

CHEF

I ain't coming in there! Them

bastards attacked us!

PHOTOGRAPHER

Zap 'em with your siren, man. Zap

'em with your siren.

Chef BLOWS THE SIREN on the PBR. The Natives react, never having heard one before; they scatter in all directions, running away scared.

The photographer moves down onto the landing, directing the boat.

PHOTOGRAPHER (CONT’D)

There's mines over there! Mines

over there, too! And watch out,

those goddamn monkeys bit you, I

tell you.

The PBR crew are exhausted, staring at him through their mud- and-blood splattered faces.

PHOTOGRAPHER (CONT’D)

Move it in right toward me.

120.

He jumps onboard the boat and immediately advances towards Lance. He shakes his hand, moves to the others, and shakes their hands as well.

PHOTOGRAPHER (CONT’D)

I'm an American. An American

civilian. Hi, Yanks. Hi.

American. American civilian. It's

all right.

(to Chef)

And you got the cigarettes, and

what's what I've been dreaming of.

Chef flips him a packet of cigarettes.

WILLARD

(or photographer)

Who are you?

PHOTOGRAPHER

Who are you? I'm a

photojournalist. I've covered the

war since '64. I've been in Loas,

Cambodia, 'Man...

(looking around the boat)

I'll tell you one thing. This boat

is a mess, man.

WILLARD

(gestures to natives)

Who are all these people?

PHOTOGRAPHER

They think you've come to take him

away. I hope that isn't true.

WILLARD

Take who away?

PHOTOGRAPHER

(gestures to temple)

Him! Colonel Kurtz! These are all

his children, man, as far as you

can see. Hell, man, out here, we

are all his children.

WILLARD

Could we talk to Colonel Kurtz?

PHOTOGRAPHER

Hey, man, you don't talk to the

Colonel. Well, you listen to him.

121.

Willard steps off the boat onto the steps. He turns and looks back at the Photographer.

PHOTOGRAPHER (CONT’D)

The man's enlarged my mind. He's a

poet-warrior in a classic sense. I

mean, sometimes he'll-well, you say

hello to him, right? And he'll

just walk right by you and he won't

even notice you. And then suddenly

he'll grab you and he'll throw you

in a corner and he'll say "Do you

know that the 'if' is the middle

word in 'life'? If you can keep

your head when all about you are

losing theirs and blaming it on

you. If you can trust yourself

when all men doubt you." I'm a

little man, I'm a little man. He's

a great man.

(a beat)

"I should have been a pair of

ragged claws scuttling across

floors of silent seas."

Willard, incredulous, turns away to Lance.

WILLARD

Stay with the boat.

PHOTOGRAPHER

Don't go without me, okay. I want

to get a picture.

Willard and Chef start up the steps. The Photographer walks with them, taking photographs.

TRACKING SHOT

They reach the top of the steps.

Gradually the natives and savages

show themselves-fierce and

frightening, jungle fighters,

mostly Montagnard. They wear only

loincloths and bandoleers of

ammunition. Their bodies are

painted in strange patterns. Death

and parts of bodies are everywhere.

PHOTOGRAPHER

He can be terrible, and he can be

mean, and he can be right. He's

fighting the war. He's a great

man. I mean, I wish I had words

you know? I wish I had words.

(MORE)

122.

PHOTOGRAPHER (CONT'D)

I could tell you something like,

the other day he wanted to kill me.

WILLARD

Why did he want to kill you?

They come to a stop.

PHOTOGRAPHER

Because I took his picture. He

said, "If you take my picture

again, I'm going to kill you." And

he meant it. See, just lay cool,

lay cool. Lay back, dig it.

They start walking forward again, as the photographer continues.

PHOTOGRAPHER (CONT’D)

He gets friendly again, he really

does. But you don't judge the

colonel. You don't judge the

colonel like ordinary men.

ANGLE ON WILLARD

looking carefully as he moves forward

MOVING POV

More natives and savages.

Interspersed among them are a few

taller men with paler skins, with

the remnants of army insignia on

them.

ANGLE ON WILLARD

reacting, as he moves forward. Chef is frightened, as he follows Willard.

ANOTHER ANGLE

They move closer and closer to the

temple. The photographer runs up

ahead of Willard and stops in front

of the man with paler skins...these

are remnants of the Green Beret "A"

Team.

PHOTOGRAPHER

Okay, watch it now! These are

Americans! Americans!

(to Willard)

You can feel the vibe of this

place. Let me take a picture.

(MORE)

123.

PHOTOGRAPHER (CONT'D)

Hey, could you hold it? Hello?

Could you hold it for a minute?

The photographer starts clicking away with a Nikon, as Willard moves toward what once must have been an American. He wears only a shotgun cartridge and striker pants. His face is darkened from dirt, battle smoke, matted mud and grease.

Willard stops and looks at him.

Colby?

WILLARD

Colby is silent. Then he and the other Berets, woman, children, etc., slowly part, making way for Willard. Willard slowly moves through the group and looks.

WHAT HE SEES

The stone steps of the temple. Resting on the steps are freshly screed heads, blood washing down from them. They sit decorating the entrance to the temple like so many gruesome pumpkins.

PHOTOGRAPHER

The heads. You're looking at the

heads. Sometimes he goes too far,

and he's the first one to admit it.

Chef, behind Willard, looks at the heads.

CHEF

He's gone crazy.

PHOTOGRAPHER

Wrong! Wrong! If you could have

heard the man just two days ago, if

you could've heard him then. God.

You were gonna call him crazy?

Fucking A.

CHEF

WILLARD

I just want to talk to him.

PHOTOGRAPHER

Well, man, he's gone away. He disappeared out in the jungle with his people.

He continues forward. The others follow.

124.

WILLARD

I'll wait for him.

PHOTOGRAPHER

He feels comfortable with his

people. He forgets himself with

his people. He forgets himself.

CHEF

Captain, maybe we should wait back

at the boat.

WILLARD

(turns back to him)

Okay, Chef, we'll go back to the

boat for a while.

CHEF

Yeah. Stay with Lance.

EXT. KURTZ COMPOUND - DUSK

A stone head with palm ;eaves hanging over it.

EXT. PBR - DUSK

Lance is squatting at the bow of the boat holding a spear, sticking it into the water, probably trying to spear a fish.

A GROUP OF NATIVES are gathered by the steps of the dock. One of the natives climbs the tree next to the dock and cuts loose a dead body. It falls into the river with a splash.

Chef sits next to Willard in the cabin.

CHEF

This colonel guy, he's wacko, man.

He's worse than crazy, he's evil!

That's what the man's got set up

here, man! It's fucking pagan

idolatry! Look around you! Shit,

he's loco.

Willard is putting on his tiger shirt.

WILLARD

Then you'll help me?

CHEF

Fucking A, I'll help you. I'll do

anything to get out of this joint!

We could blow all them assholes

away!

125.

CAMERA PANS the savages onshore, who have gathered around them, watching them. We SEE a sign written in a wild hand with white spray paint on a wall: "OUR MOTTO: APOCALYPSE NOW!"

CHEF (CONT’D)

They're so fucking spaced out, they

wouldn't even know it. I ain't

afraid of all them fucking skulls

and altars and shit! I used to

think that if I died in an evil

place, then my soul wouldn't make

it to heaven. But now...fuck. I

don't care where it goes, as long

as it ain't here. So what do you

want to do? I'll kill the fuck.

WILLARD

(picks up the map)

No, no. I'm gonna need you to wait

here, Chef. I'll go up with Lance

and scrounge around, check the

place out, see if I can find the

colonel, okay?

CHEF

But what do you want me to do?

Damnit.

Willard picks up a field radio and hands it to Chef, Chef looks at it.

WILLARD

Here, you take the radio, and if I

don't get back by 22:00 hours, you

call in the air strike.

Chef stares at him.

CHEF

Air strike?

WILLARD

The code is "Almighty," coordinates zero-nine-two-six-four-seven-one-

two. It's all in there.

He hands the map to Chef.

EXT. KURTZ COMPOUND - DAY

Willard and Lance walk through the temple grounds in the rain. Willard is gradually surrounded by more and more native soldiers.

126.

WILLARD (V.O.)

Everything I saw told me that Kurtz

had gone insane. The place was

full of bodies. North Vietnamese,

Vietcong, Cambodians...If I was

still alive, it was because he

wanted me that way.

The soldiers close in on him, pick him up, and turn him upside down, rolling him in the mud.

LOW ANGLE ON LANCE

He is slowly walking among passing natives. He is oblivious to what is happening to Willard.

MED. SHOT - WILLARD

Being turned in mud by the natives.

DISSOLVE TO:

INT. KURTZ HEADQUARTERS - DAY

Willard, hands tied behind his back, is guided down a long corridor, followed by two Montagnards, both armed.

WILLARD (V.O.)

It smelled like slow death in

there. Malaria and nightmares.

This was the end of the river, all

right.

They turn into the main room. The natives indicate for Willard to kneel down on the floor. The CAMERA MOVES, REVEALING KURTZ lying in shadow on a bed. We will SEE him only in darkness and shadow throughout the scene.

KURTZ

Where you from, Willard?

WILLARD

I'm from Ohio, sir.

KURTZ

Were you born there?

Yes, sire.

WILLARD

KURTZ

Whereabouts?

127.

WILLARD

Toledo, sir.

KURTZ

How far are you from the river?

WILLARD

The Ohio River, sir? About two

hundred miles.

KURTZ

I went down that river once when I

was a kid. There's a place in the

river, I can't remember...must have

been a gardenia plantation, or a

flower plantation at one time. It's

all wild and overgrown now. But for

about five miles, you'd think that

heaven just fell on the earth, in

the form of gardenias.

Kurtz reaches down and picks up a bowl full of water. He splashes water on his face and head.

KURTZ (CONT’D)

Have you ever considered, any real

freedoms? Freedoms from the

opinions of others. Even the

opinions of yourself. Did they say

why, Willard? Why they wanted to

terminate my command?

WILLARD

I was sent on a classified mission,

sir.

KURTZ

Its no longer classified, is it.

What did they tell you?

WILLARD

They told me, that you had

gone...totally insane. And that

your methods were unsound.

KURTZ

Are my methods unsound?

WILLARD

I don't see any method at all, sir.

128.

KURTZ

I expected someone like you. What

did you expect? Are you an

assassin?

WILLARD

I'm a soldier.

We finally SEE KURTZ'S FACE.

KURTZ

You're neither. You're an errand

boy, sent by grocery clerks, to

collect a bill.

EXT. KURTZ COMPOUND - TRAIL UP FROM RIVER - DAY

The photographer hurries down the trail past villagers and soldiers toward the compound, and up the hill that leads toward the TIGER CAGES in front of the Monkey Temple. He spots a jug full of water, with a ladle in it.

AT TIGER CAGES - TO GO WITH PHOTOGRAPHER

The photographer moves to Willard who is in a tiger cage. Willard is in pretty bad shape, weak and thirsty. The photographer stops in front of him. He holds the ladle for Willard to drink from.

PHOTOGRAPHER

Why? Why would a nice guy like you

want to kill a genius? Feeling

pretty good, huh? Why? Do you

know that the man really likes you?

He puts a cigarette in Willard's mouth.

PHOTOGRAPHER (CONT’D)

He likes you. He really likes you.

But he's got something in mind for

you. Aren't you curious about

that? I'm curious. I'm very

curious. Are you curious?

The photographer walks around Willard's cage.

PHOTOGRAPHER (CONT’D)

There's something happening out

here, man. You know something,

man? I know something you that you

don't know. That's right, Jack .

The man is clear in his mind, but

his soul is mad. Oh, yeah. He's

dying, I think. He hates all this.

(MORE)

129.

PHOTOGRAPHER (CONT’D)

He hates it! But the man's a...He

reads poetry out loud, all right?

And a voice...he likes you 'cause

you're still alive. He's got plans

for you. No, I'm not gonna help

you. You're gonna help him, man.

You're gonna help him. I mean,

what are they gonna sat when he's

gone? 'Cause he dies when it dies,

when it dies, he dies! What are

they gonna say about him? He was a

kind man? He was a wise man? He

has plans? He has wisdom?

Bullshit, man! Am I gonna be the

one that's gonna set them straight?

Look at me! Wrong!

(points to Willard)

You!

EXT. PBR - RAIN - DAY

Chef is sleeping on-deck in the rain, under a tarp.

CHEF

(to himself)

Almost eight hours. I'm asleep.

I'm asleep and dreaming I'm on this

shitty boat. Fuck. Has it been

eight hours?

1. e lifts the tap off, gets up, and goes to the cabin. HIGH ANGLE ON PBR
2. t is raining

CHEF (O.S.)

(into radio)

Hello, Almighty. Almighty. This

is PBR Street Gang. Radio check,

over.

MALE VOICE (OVER RADIO)

PBR Street Gang, this is Almighty

standing by, over.

EXT. KURTZ COMPOUND - NIGHT

CLOSE ON KURTZ'S BOOTS

Walking on wet ground.

130.

ANGLE ON WILLARD IN TIGER CAGE

covered with mud, tied up and wet from rain. He slowly looks up.

KURTZ IS STANDING OVER HIM. He is dressed in the black pajamas of the Vietcong. His face is made up in green-and- black camouflage paint. He disappears behind Willard, then reappears and drops something into Willard's lap. Willard looks down and sees CHEF'S SEVERED HEAD in his lap.

Willard screams and struggles to jostle it out of his lap. It finally falls out.

CLOSE ON CHEF'S HEAD

in the mud

CLOSE ON WILLARD

Moaning,

WILLARD

Oh, Christ!

DISSOLVE TO:

INT. CONEX CONTAINER - DAY

Willard is passed out, lying on the floor of a metal CONEX CONTAINER. It is hot. Some CHILDREN are peeking in at him.

The two front doors of the container are opened. Light floods in. Kurtz is standing there with the children. He holds a bunch of magazine articles.

He sits down on a dirt step, surrounded by children.

He looks down at a magazine article and begins to read it to Willard.

KURTZ

(reading)

"Time magazine. The weekly news

magazine. September 22, 1967,

volume ninety, number twelve. The

War on the Horizon. The American

people may find it hard to believe

that the U.S. is winning the war in

Vietnam. Nevertheless, one of the

most exhaustive inquiries into the

status of the conflict yet

compiled, offers considerable

evidence that the weight of U.S.

(MORE)

131.

KURTZ (CONT'D)

power, two and a half years after

the bug buildup began, is beginning

to make itself felt. White House

officials maintain the impact of

that strength may bring the enemy

to the point where he could simply

be unable to continue fighting."

(to Willard)

Is this familiar?

Willard reacts.

KURTZ (CONT’D)

(reading)

"Because Lyndon Johnson fears that

the U.S. public is in no mood to

accept its optimistic conclusions,

he may never permit the report to

be released in full. Even so, he

is sufficiently impressed with the

findings, and sufficiently anxious

to make their conclusions known, to

permit experts who have been

working on it to talk about it in

general terms." No date, Time

Magazine. "Sir Robert Thompson,

who led the victory over the

Communists guerrillas in Malay, and

who is now a RAND Corporation

consultant, recently returned to

Vietnam to sound out the situation

for President Nixon. He told the

president last week that things

felt much better, and smelled much

better over there."

He looks over at Willard.

KURTZ (CONT’D)

(to Willard)

How do they smell to you, soldier?

Willard doesn't answer. Kurtz rises. The children are laughing and giggling. Kurtz drops the magazine articles in Willard's lap.

KURTZ (CONT’D)

You'll be free. You'll be under

guard. Read these at your leisure.

Don't lose them. Don't try to

escape, you'll be shot. We can

talk of these things later.

132.

Kurtz turns and exits, closing one of the doors, leaving the other open. Willard watches him go. The children stay, looking at him, laughing and giggling. Willard slowly and painfully pulls himself to his feet. He stands there a moment looking at the children, then collapses to the floor.

DISSOLVE TO:

EXT. KURTZ COMPOUND - HIGH ANGLE - DAY

The river and temple.

DISSOLVE TO:

INT. KURTZ COMPOUND - DAY

An unconscious Willard is being carried by some native soldiers. They lay him gently on the floor of the temple. Ladle water into his mouth, try to feed him rice. He turns his head.

WHAT HE SEES

Kurtz, in the shadows.

DISSOLVE TO:

WILLARD, HIS DELIRIUM

NATIVE EATING BOWL OF RICE IN CORRIDOR

DISSOLVE TO:

KURTZ CATCHING A FLY

DISSOLVE TO:

STONE STATUES

KURTZ

(reading)

"We are the hollow men and the

stuffed men together filled with

straw. Alas dried voices, when

whisper together quiet and

meaningless wind in dried rats'

feet over broken glass our dry

cellar."

DISSOLVE TO:

133.

WILLARD AND THE PHOTOGRAPHER

In Kurtz's chamber. Willard is lying on a bed of sandbags. The photographer is next to him. They are both listening to Kurtz read the poem.

PHOTOGRAPHER

He's really out there.

ANGLE ON KURTZ

seated on a small chest next to his bed. He is reading from a small book. It is "The Hollow Man" by T.S. Eliot.

KURTZ

(reading)

"Shape without form, shade without

color, force, gesture without

motion;"

PHOTOGRAPHER

Do you know what the man's saying?

Do you?

KURTZ

(reading)

"Those who have crossed direct

eyes..."

PHOTOGRAPHER

This is dialectics. It's very

simple dialectics. It's one

through nine, no maybes, no

supposes, no fractions. You can't

travel in space. You can't go out

into space, without like, you know,

with fractions. What are you gonna

land on? One quarter? Three-

eighths? What are you gonna do

when you go from here to Venus?

That's dialectic physics, okay?

Dialectic logic is, there's only

love and hate. You either love

somebody, or you hate them.

Kurtz throws a bunch of bananas at the photographer.

KURTZ

Mutt! You mutt!

PHOTOGRAPHER

This is the way the fucking world

lives. Look at this fucking shit

we're in, man!

(MORE)

134.

PHOTOGRAPHER (CONT'D)

Not with a bang, Whimper. And with

a whimper I'm fucking splitting,

Jack.

Photographer rises and exits down the corridor leaving Willard alone. Kurtz looks at him.

DISSOLVE TO:

INT. KURTZ QUARTERS - DAY

Willard is at a table containing Kurtz's belongings. He looks at his uniform, military decorations, photographs of Kurtz's family, a bible, and other books lying on the table.

WILLARD (V.O.)

On the river, I thought that the

minute I looked at him, I'd know

what to do. But it didn't happen.

I was in there with him for days.

Not under guard. I was free. But

he knew I wasn't going anywhere. He

knew more about what I was going to

do at I did. If the generals back

in Nah Trang could see what I saw,

would they still want me to kill

him? More than ever, probably. And

what would his people back home

want, if they ever learned just how

far from them he'd really gone. He

broke from them, and then he broke

from himself. I'd never seen a man

so broken up and ripped apart.

ANGLE ON DOORWAY

Kurtz enters in the darkness.

KURTZ

I've seem horrors. Horrors that

you've seen. But you have no right

to call me a murderer. You have a

right to kill me. You have a right

to do that. But you have no right

to judge me.

CLOSE-UP ON KURTZ

Eating a piece of fruit.

KURTZ

It's impossible for words to

describe what is necessary to those

who do not know what horror means.

(MORE)

135.

KURTZ (CONT'D)

Horror. Horror has a face. And you must make a friend of horror. Horror and moral terror are your friends. If they are not, then they are enemies to be feared. They are truly enemies.

ANOTHER ANGLE

Colby is standing in the rear doorway of the main temple, going through a Tai Chi routine. Willard sits in front of him, looking at Kurtz, listening to him as he talks from the bed. A native WOMAN is there, listening as well.

KURTZ

I remember when I was with Special Forces. Seems a thousand centuries ago. We went into a camp to inoculate some children. We'd left the camp after we had inoculated the children for polio. And this old man came running after us, and he was crying. He couldn't say. We went back there, and they had come and hacked off every inoculated arm. They they were, in a pile. A pile of little arms. And, I remember, I cried, I wept like some grandmother. I wanted to tear my teeth out. I didn't know what I wanted to do. And I want to remember it. I never want to forget it. I never want to forget it. And then I realized, like I was shot, like I was shot with a diamond bullet through my forehead. And I thought, My God, the genius of that! The genius. The will to do that. Perfect, genuine,

complete, crystalline, pure. And then I realized, they were stronger than we. Because they could stand it. These were not monsters. These were men, strained cadres. These men who fought with their hearts, who have families, who have children, who are filled with love...that they had the strength, the strength to do that. If I had ten divisions of those men, then our troubles here would be over very quickly.

(MORE)

136.

KURTZ (CONT'D)

You have to have men who are moral,

and at the same time, who are able

to utilize their primordial

instincts to kill without feeling,

without passion. Without judgment.

Without Judgment. Because it's

judgment that defeats us.

CLOSE ON WILLARD

He slowly raises his hand and examines it.

KURTZ

I worry that my son might not

understand what I've tried to be.

And if I were to be killed,

Willard, I would want someone to go

to my home and tell my son

everything...

DISSOLVE TO:

ANGLE ON KURTZ

Standing in the doorway of the temple. We SEE a WATER BUFFALO in the foreground, walking down the steps.

EXT. TEMPLE - CEREMONIAL GROUNDS - NIGHT

NATIVES are conducting a ceremony. They are dancing and singing around the WATER BUFFALO. A priest is chanting.

KURTZ (V.O.)

Everything I did. Everything you

saw. Because there's nothing I

detest more than the stench of

lies. And if you understand me,

Willard, you will do this for me.

Lance is sitting with the natives, painted and dressed like one of them. A line of natives with spears dance toward the water buffalo. Others are sitting and singing in the background.

EXT. THE PBR - NIGHT

It has been deserted except for monkeys crawling on it.

MALE VOICE (OVER RADIO)

PBR Street Gang, this is Almighty

standing by, over. PBR Street

1. ang, this is Almighty standing by.
2. ow do you copy?

137.

CLOSE ON WILLARD

On the boat, lying on his back. He rolls over.

WILLARD (V.O.)

They were gonna make me a major for

this, and I wasn't even in their

fucking army anymore. Everybody

wanted me to do it. Him most of

all. I felt like he was up there,

waiting for me to take his pain

away. He just wanted to go out

like a soldier.

He gets up and emerges out of darkness.

WILLARD (V.O.)

Standing up. Not even like some

poor, wasted rag-assed renegade.

Even the jungle wanted him dead.

And that's who he really who he

took his orders from, anyway.

EXT. TEMPLE - NIGHT

ANGLE ON LANCE

smearing the water buffalo with blood that he pours from a pitcher along its neck, in preparation for the ceremony.

MIST OVER WATER

A small bubble rises to the surface, then another. Suddenly but quietly, water ad mud pour off revealing Willard, emerging slowly, head first, as if he was growing out of the water.

WATER BUFFALO

Its head being tied to a stake.

KURTZ

Silhouetted in the doorway of the

temple. He enters the temple.

WILLARD

Sits crouched holding a machete as

natives dance in the background.

He rises slowly and then runs off.

138.

INT. INSIDE THE TEMPLE - NIGHT

Willard works his way toward the interior of the temple. He appears behind a guard, pouts his hand over the warriors mouth, brings up the machete, and pulls him back into the dark shadows.

INTERCUT THE FOLLOWING ACTION WITH WATER BUFFALO CEREMONY Kurtz is sitting and talking into a tape recorder. Willard

slowly moves forward, quietly sneaking toward Kurtz as he speaks.

KURTZ ()

We train young men to drop fire on

people, but their commanders won't

allow them to write "fuck" on their

airplanes because it's obscene.

Willard steps behind Kurtz, raising the machete. Kurtz turns. Willard brings the knife down and starts hacking away at Kurtz, hitting him first on the shoulder, then all over.

NATIVES

Simultaneously slashing a knife

into the back of the water buffalo.

KURTZ

Falls to the floor.

WATER BUFFALO

Falling to the ground as natives

swing knives into its back.

WILLARD

Staring at Kurtz.

CLOSE ON KURTZ

Lying on the ground.

KURTZ

The horror....the horror.

He dies.

CLOSE ON WILLARD

hands on his face, reacting to what he's done.

DISSOLVE TO:

139.

NATIVES AND LANCE

Around dead water buffalo, carving it up.

DISSOLVE TO:

WILLARD

stands at the temple entrance. He

looks at the natives outside. He

walks over to Kurtz's desk. Flips

through Kurtz's manuscript and

stops. We SEE handwriting on the

pages: "Drop the Bomb, Exterminate

them all."

EXT. FRONT OF TEMPLE - NIGHT

The natives are all gathered in front of the temple, looking at Willard as he moves forward holding the machete and Kurtz's books. The entire village is there, about a THOUSAND NATIVES in all. They realize that Willard is now their leader and pay homage to him by kneeling or sitting down.

Willard slowly walks down the steps, throwing down the machete. The natives rise and throw down their weapons in imitation as he walks through them. He moves to LANCE, who is in the midst of all the natives. Willard looks at him, then takes him by the hand and pulls him away with him through the rest of the natives.

DISSOLVE TO:

EXT. PBR - RAIN - NIGHT

The PBR pulls way from the shore. Willard is at the helm of the boat. Lance is squatting by the spotlight.

MALE VOICE (OVER RADIO)

Calling PBR Street Gang. PBR

Street Gang, this is Almighty. Do

you read me? Over. PBR Street

Gang, this is Almighty.

Willard turns off the radio.

The PBR moves along the river, away from the flaming shoreline.

140.

CLOSE ON WILLARD

KURTZ (O.S.)

The horror...the horror.

DISSOLVE TO:

THE GREAT STONE FACE OF THE TEMPLE

FADE OUT:

THE END
