# Supplementary material
Source: ML conference proceedings conference paper supplement (https://openreview.net/forum?id=Sxi6gBtJcI)
Supplement: supplementary_material [file Claude Results.xlsx]

## Sheet: Sheet1
Approach	Interesting	Coherent	Humanlike	Dict & Gram	Transition	Format	Consistency
ROLLING	0.333	0.267	0.067	0	0.067	0.067	0.133
R2	0.733	0.733	0.933	1	0.933	0.933	0.933
Approach	Interesting	Coherent	Humanlike	Dict & Gram	Transition	Format	Consistency
Dramatron	0.142857	0.285714	0.321429	0.214286	0.142857	0.142857	0.571429
R2	0.857143	0.714286	0.678571	0.785714	0.857143	0.857143	0.785714
Approach	Interesting	Coherent	Humanlike	Dict & Gram	Transition	Format	Consistency
wawa	0.233333	0.3	0.333333	0.2	0.133333	0.466667	0.533333
R2	0.766667	0.7	0.666667	0.833333	0.866667	0.533333	0.733333
