# Supplementary material
Source: ML conference proceedings conference paper supplement (https://openreview.net/forum?id=Sxi6gBtJcI)
Supplement: supplementary_material [file Far-From-the-Madding-Crowd_Thomas-novel.docx]

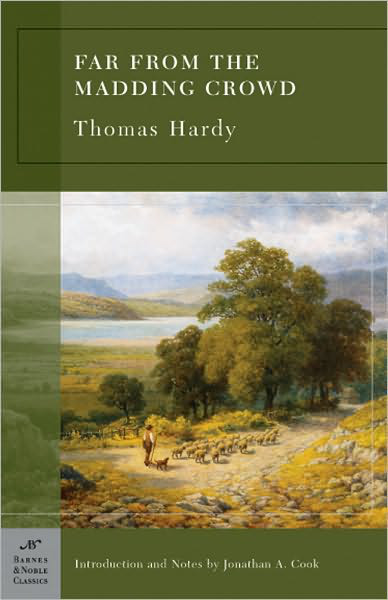


# Table of Contents

[INTRODUCTION (By Jonathan A. Cook)](#Top_of_bano_9781411432178_oeb_it)

[AUTHOR’S PREFACE](#Top_of_bano_9781411432178_oeb_pr)

[FAR FROM THE MADDING CROWD](#Top_of_FarFromtheMaddingCrowd_ht)

[CHAPTER I - Description of Farmer Oak—An Incident](#Top_of_bano_9781411432178_oeb_c0)

[CHAPTER II - Night—The Flock—An Interior—Another Interior](#Top_of_bano_9781411432178_oeb_c0_1)

[CHAPTER III - A Girl on Horseback—Conversation](#Top_of_bano_9781411432178_oeb_c0_2)

[CHAPTER IV - Gabriel’s Resolve—The Visit—The Mistake](#Top_of_bano_9781411432178_oeb_c0_3)

[CHAPTER V - Departure of Bathsheba—A Pastoral Tragedy](#Top_of_bano_9781411432178_oeb_c0_4)

[CHAPTER VI - The Fair—The Journey—The Fire](#Top_of_bano_9781411432178_oeb_c0_5)

[CHAPTER VII - Recognition—A Timid Girl](#Top_of_bano_9781411432178_oeb_c0_6)

[CHAPTER VIII - The Malthouse—The Chat—News](#Top_of_bano_9781411432178_oeb_c0_7)

[CHAPTER IX - The Homestead-A Visitor—Half-Confidences](#Top_of_bano_9781411432178_oeb_c0_8)

[CHAPTER X - Mistress and Men](#Top_of_bano_9781411432178_oeb_c1)

[CHAPTER XI - Outside the Barracks—Snow—A Meeting](#Top_of_bano_9781411432178_oeb_c1_1)

[CHAPTER XII - Farmers—A Rule—An Exception](#Top_of_bano_9781411432178_oeb_c1_2)

[CHAPTER XIII - Sortes Sanctorum—The Valentine](#Top_of_bano_9781411432178_oeb_c1_3)

[CHAPTER XIV - Effect of the Letter—Sunrise](#Top_of_bano_9781411432178_oeb_c1_4)

[CHAPTER XV - A Morning Meeting—The Letter Again](#Top_of_bano_9781411432178_oeb_c1_5)

[CHAPTER XVI - All Saints’ and All Souls’](#Top_of_bano_9781411432178_oeb_c1_6)

[CHAPTER XVII - In the Market-Place](#Top_of_bano_9781411432178_oeb_c1_7)

[CHAPTER XVIII - Boldwood in Meditation—Regret](#Top_of_bano_9781411432178_oeb_c1_8)

[CHAPTER XIX - The Sheep-Washing—The Offer](#Top_of_bano_9781411432178_oeb_c1_9)

[CHAPTER XX - Perplexity—Grinding the Shears—A Quarrel](#Top_of_bano_9781411432178_oeb_c2)

[CHAPTER XXI - Troubles in the Fold—A Message](#Top_of_bano_9781411432178_oeb_c2_1)

[CHAPTER XXII - The Great Barn and the Sheep-Shearers](#Top_of_bano_9781411432178_oeb_c2_2)

[CHAPTER XXIII - Eventide—A Second Declaration](#Top_of_bano_9781411432178_oeb_c2_3)

[CHAPTER XXIV - The Same Night—The Fir Plantation](#Top_of_bano_9781411432178_oeb_c2_4)

[CHAPTER XXV - The New Acquaintance Described](#Top_of_bano_9781411432178_oeb_c2_5)

[CHAPTER XXVI - Scene on the Verge of the Hay-Mead](#Top_of_bano_9781411432178_oeb_c2_6)

[CHAPTER XXVII - Hiving the Bees](#Top_of_bano_9781411432178_oeb_c2_7)

[CHAPTER XXVIII - The Hollow Amid the Ferns](#Top_of_bano_9781411432178_oeb_c2_8)

[CHAPTER XXIX - Particulars of a Twilight Walk](#Top_of_bano_9781411432178_oeb_c2_9)

[CHAPTER XXX - Hot Cheeks and Tearful Eyes](#Top_of_bano_9781411432178_oeb_c3)

[CHAPTER XXXI - Blame—Fury](#Top_of_bano_9781411432178_oeb_c3_1)

[CHAPTER XXXII - Night-Horses Tramping](#Top_of_bano_9781411432178_oeb_c3_2)

[CHAPTER XXXIII - In the Sun—A Harbinger](#Top_of_bano_9781411432178_oeb_c3_3)

[CHAPTER XXXIV - Home Again—A Trickster](#Top_of_bano_9781411432178_oeb_c3_4)

[CHAPTER XXXV - At an Upper Window](#Top_of_bano_9781411432178_oeb_c3_5)

[CHAPTER XXXVI - Wealth in Jeopardy—The Revel](#Top_of_bano_9781411432178_oeb_c3_6)

[CHAPTER XXXVII - The Storm—The Two Together](#Top_of_bano_9781411432178_oeb_c3_7)

[CHAPTER XXXVIII - Rain—One Solitary Meets Another](#Top_of_bano_9781411432178_oeb_c3_8)

[CHAPTER XXXIX - Coming Home—A Cry](#Top_of_bano_9781411432178_oeb_c3_9)

[CHAPTER XL - On Casterbridge Highway](#Top_of_bano_9781411432178_oeb_c4)

[CHAPTER XLI - Suspicion-Fanny Is Sent For](#Top_of_bano_9781411432178_oeb_c4_1)

[CHAPTER XLII - Joseph and His Burden—Buck’s Head](#Top_of_bano_9781411432178_oeb_c4_2)

[CHAPTER XLIII - Fanny’s Revenge](#Top_of_bano_9781411432178_oeb_c4_3)

[CHAPTER XLIV - Under a Tree—Reaction](#Top_of_bano_9781411432178_oeb_c4_4)

[CHAPTER XLV - Troy’s Romanticism](#Top_of_bano_9781411432178_oeb_c4_5)

[CHAPTER XLVI - The Gurgoyle: Its Doings](#Top_of_bano_9781411432178_oeb_c4_6)

[CHAPTER XLVII - Adventures by the Shore](#Top_of_bano_9781411432178_oeb_c4_7)

[CHAPTER XLVIII - Doubts Arise—Doubts Linger](#Top_of_bano_9781411432178_oeb_c4_8)

[CHAPTER XLIX - Oak’s Advancement—A Great Hope](#Top_of_bano_9781411432178_oeb_c4_9)

[CHAPTER L - The Sheep Fair—Troy Touches His Wife’s Hand](#Top_of_bano_9781411432178_oeb_c5)

[CHAPTER LI - Bathsheba Talks with Her Outrider](#Top_of_bano_9781411432178_oeb_c5_1)

[CHAPTER LII - Converging Courses](#Top_of_bano_9781411432178_oeb_c5_2)

[I](#h1)

[II](#h2)

[III](#h3)

[IV](#h4)

[V](#h5)

[VI](#h6)

[VII](#h7)

[CHAPTER LIII - Concurritur—Horse Momento](#Top_of_bano_9781411432178_oeb_c5_3)

[CHAPTER LIV - After the Shock](#Top_of_bano_9781411432178_oeb_c5_4)

[CHAPTER LV - The March Following—“Bathsheba Boldwood”](#Top_of_bano_9781411432178_oeb_c5_5)

[CHAPTER LVI - Beauty in Loneliness—After All](#Top_of_bano_9781411432178_oeb_c5_6)

[CHAPTER LVII - A Foggy Night and Morning—Conclusion](#Top_of_bano_9781411432178_oeb_c5_7)

[INDEX OF PLACES IN HARDY’S WESSEX NOVELS](#Top_of_bano_9781411432178_oeb_bm)

[ABOUT THE AUTHOR](#Top_of_bano_9781411432178_oeb_at)

[THE WORLD OF THOMAS HARDY](#Top_of_bano_9781411432178_oeb_fm_1)

[AN INSPIRATION FOR FAR FROM THE MADDING CROWD](#Top_of_bano_9781411432178_oeb_bm_1)

[COMMENTS & QUESTIONS](#Top_of_bano_9781411432178_oeb_bm_2)

[FOR FURTHER READING](#Top_of_bano_9781411432178_oeb_bm_3)

[ENDNOTES](#Top_of_bano_9781411432178_oeb_nt)

FROM THE PAGES OF
FAR FROM THE MADDING CROWD

His Christian name was Gabriel, and on working days he was a young man of sound judgment, easy motions, proper dress, and general good character. (page 11)

He had just reached the time of life at which “young” is ceasing to be the prefix of “man” in speaking of one. He was at the brightest period of masculine growth, for his intellect and his emotions were clearly separated: he had passed the time during which the influence of youth indiscriminately mingles them in the character of impulse, and he had not yet arrived at the stage wherein they become united again, in the character of prejudice, by the influence of a wife and family. In short, he was twenty-eight, and a bachelor. (page 13)

The only superiority in women that is tolerable to the rival sex is, as a rule, that of the unconscious kind; but a superiority which recognizes itself may sometimes please by suggesting possibilities of capture to the subordinated man. (page 33)

It may have been observed that there is no regular path for getting out of love as there is for getting in. Some people look upon marriage as a short cut that way, but it has been known to fail. (page 42)

It is safer to accept any chance that offers itself, and extemporize a procedure to fit it, than to get a good plan matured, and wait for a chance of using it. (pages 48-49)

“Ah, he’s his grandfer’s own grandson!—his grandfer were just such a nice unparticular man!” (page 64)

She resolved never again, by look or by sign, to interrupt the steady flow of this man’s life. But a resolution to avoid an evil is seldom framed till the evil is so far advanced as to make avoidance impossible. (page 132)

It appears that ordinary men take wives because possession is not possible without marriage, and that ordinary women accept husbands because marriage is not possible without possession; with totally differing aims the method is the same on both sides. But the understood incentive on the woman’s part was wanting here. Besides, Bathsheba’s position as absolute mistress of a farm and house was a novel one, and the novelty had not yet begun to wear off.

(page 139)

“What difference does it make whose sweetheart she is, since she can’t be yours?” (page 236)

“There are considerations even before my consideration for you; reparations to be made—ties you know nothing of. If you repent of marrying, so do I.” (page 285)

“It is difficult for a woman to define her feelings in language which is chiefly made by men to express theirs.” (page 364)

Theirs was that substantial affection which arises (if any arises at all) when the two who are thrown together begin first by knowing the rougher sides of each other’s character, and not the best till further on, the romance growing up in the interstices of a mass of hard prosaic reality. This good-fellowship—camaraderie—usually occurring through similarity of pursuits, is unfortunately seldom superadded to love between the sexes, because men and women associate, not in their labours, but in their pleasures merely. Where, however, happy circumstance permits its development, the compounded feeling proves itself to be the only love which is strong as death—that love which many waters cannot quench, nor the floods drown, beside which the passion usually called by the name is evanescent as steam. (page 409)


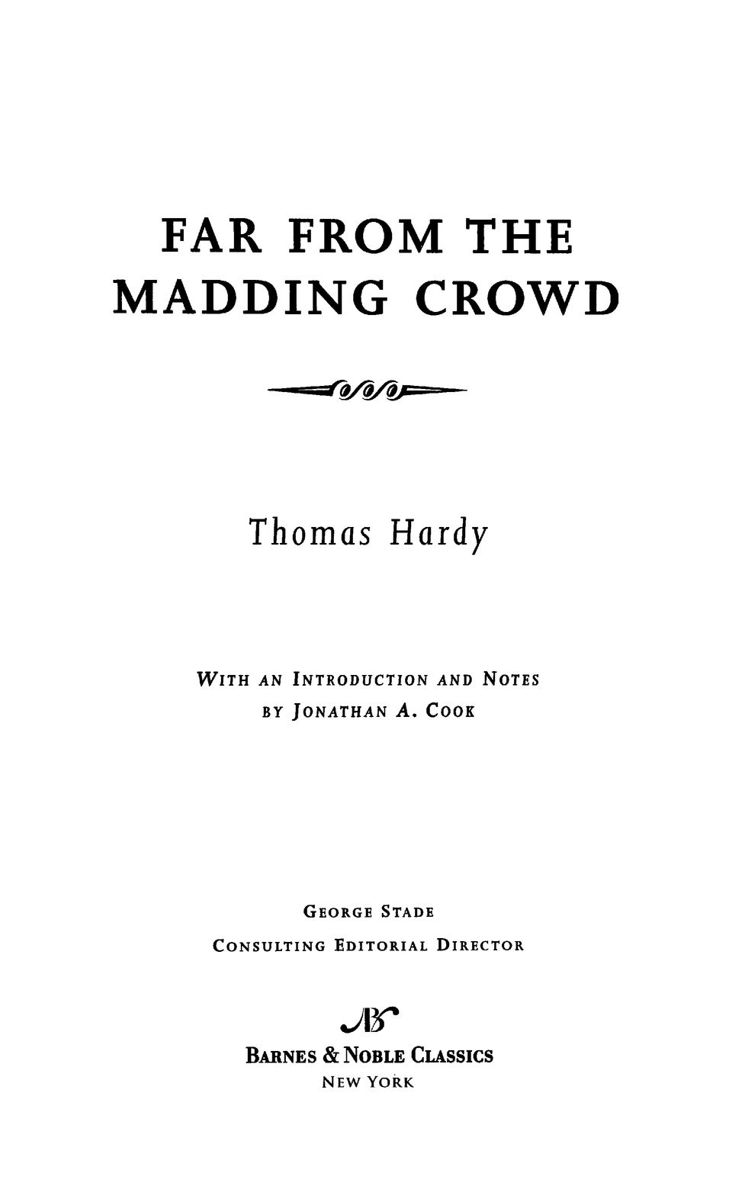


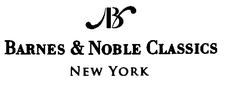


Published by Barnes & Noble Books
122 Fifth Avenue
New York, NY 10011

[www.barnesandnoble.com/classics](http://www.barnesandnoble.com/classics)

Far From the Madding Crowd was originally published in 1874.
The present text is that of Hardy’s 1912 Wessex edition.

Published in 2005 by Barnes & Noble Classics with new Introduction,
Notes, Biography, Chronology, Index of Places, Inspired By,
Comments & Questions, and For Further Reading.

Introduction, Notes, and For Further Reading

Copyright @ 2005 by Jonathan A. Cook.

Note on Thomas Hardy, The World of Thomas Hardy and Far from the Madding
Crowd, Index of Places, Inspired by Far from the Madding Crowd,
Comments & Questions, and For Further Reading
Copyright © 2005 by Barnes & Noble, Inc.

All rights reserved. No part of this publication may be reproduced or
transmitted in any form or by any means, electronic or mechanical, including
photocopy, recording, or any information storage and retrieval system,
without the prior written permission of the publisher.

Barnes & Noble Classics and the Barnes & Noble Classics
colophon are trademarks of Barnes & Noble, Inc.

Far from the Madding Crowd

ISBN-13: 978-1-59308-223-9
ISBN-10: 1-59308-223-1

eISBN : 978-1-411-43217-8

LC Control Number 2004116676

Produced and published in conjunction with:
Fine Creative Media, Inc.
322 Eighth Avenue
New York, NY 10001

Michael J. Fine, President and Publisher

Printed in the United States of America

QM

3 5 7 9 10 8 6 4

Table of Contents

COVER

[INTRODUCTION (By Jonathan A. Cook)](#Top_of_bano_9781411432178_oeb_it)

[AUTHOR’S PREFACE](#Top_of_bano_9781411432178_oeb_pr)

[FAR FROM THE MADDING CROWD](#Top_of_FarFromtheMaddingCrowd_ht)

[Chapter I - Description of Farmer Oak—An Incident](#Top_of_bano_9781411432178_oeb_c0)

[Chapter II - Night—The Flock—An Interior—Another Interior](#Top_of_bano_9781411432178_oeb_c0_1)

[Chapter III - A Girl on Horseback—Conversation](#Top_of_bano_9781411432178_oeb_c0_2)

[Chapter IV - Gabriel’s Resolve—The Visit—The Mistake](#Top_of_bano_9781411432178_oeb_c0_3)

[Chapter V - Departure of Bathsheba—A Pastoral Tragedy](#Top_of_bano_9781411432178_oeb_c0_4)

[Chapter VI - The Fair—The Journey—The Fire](#Top_of_bano_9781411432178_oeb_c0_5)

[Chapter VII - Recognition—A Timid Girl](#Top_of_bano_9781411432178_oeb_c0_6)

[Chapter VIII - The Malthouse—The Chat—News](#Top_of_bano_9781411432178_oeb_c0_7)

[Chapter IX - The Homestead-A Visitor—Half-Confidences](#Top_of_bano_9781411432178_oeb_c0_8)

[Chapter X - Mistress and Men](#Top_of_bano_9781411432178_oeb_c1)

[Chapter XI - Outside the Barracks—Snow—A Meeting](#Top_of_bano_9781411432178_oeb_c1_1)

[Chapter XII - Farmers—A Rule—An Exception](#Top_of_bano_9781411432178_oeb_c1_2)

[Chapter XIII - Sortes Sanctorum—The Valentine](#Top_of_bano_9781411432178_oeb_c1_3)

[Chapter XIV - Effect of the Letter—Sunrise](#Top_of_bano_9781411432178_oeb_c1_4)

[Chapter XV - A Morning Meeting—The Letter Again](#Top_of_bano_9781411432178_oeb_c1_5)

[Chapter XVI - All Saints’ and All Souls’](#Top_of_bano_9781411432178_oeb_c1_6)

[Chapter XVII - In the Market-Place](#Top_of_bano_9781411432178_oeb_c1_7)

[Chapter XVIII - Boldwood in Meditation—Regret](#Top_of_bano_9781411432178_oeb_c1_8)

[Chapter XIX - The Sheep-Washing—The Offer](#Top_of_bano_9781411432178_oeb_c1_9)

[Chapter XX - Perplexity—Grinding the Shears—A Quarrel](#Top_of_bano_9781411432178_oeb_c2)

[Chapter XXI - Troubles in the Fold—A Message](#Top_of_bano_9781411432178_oeb_c2_1)

[Chapter XXII - The Great Barn and the Sheep-Shearers](#Top_of_bano_9781411432178_oeb_c2_2)

[Chapter XXIII - Eventide—A Second Declaration](#Top_of_bano_9781411432178_oeb_c2_3)

[Chapter XXIV - The Same Night—The Fir Plantation](#Top_of_bano_9781411432178_oeb_c2_4)

[Chapter XXV - The New Acquaintance Described](#Top_of_bano_9781411432178_oeb_c2_5)

[Chapter XXVI - Scene on the Verge of the Hay-Mead](#Top_of_bano_9781411432178_oeb_c2_6)

[Chapter XXVII - Hiving the Bees](#Top_of_bano_9781411432178_oeb_c2_7)

[Chapter XXVIII - The Hollow Amid the Ferns](#Top_of_bano_9781411432178_oeb_c2_8)

[Chapter XXIX - Particulars of a Twilight Walk](#Top_of_bano_9781411432178_oeb_c2_9)

[Chapter XXX - Hot Cheeks and Tearful Eyes](#Top_of_bano_9781411432178_oeb_c3)

[Chapter XXXI - Blame—Fury](#Top_of_bano_9781411432178_oeb_c3_1)

[Chapter XXXII - Night-Horses Tramping](#Top_of_bano_9781411432178_oeb_c3_2)

[Chapter XXXIII - In the Sun—A Harbinger](#Top_of_bano_9781411432178_oeb_c3_3)

[Chapter XXXIV - Home Again—A Trickster](#Top_of_bano_9781411432178_oeb_c3_4)

[Chapter XXXV - At an Upper Window](#Top_of_bano_9781411432178_oeb_c3_5)

[Chapter XXXVI - Wealth in Jeopardy—The Revel](#Top_of_bano_9781411432178_oeb_c3_6)

[Chapter XXXVII - The Storm—The Two Together](#Top_of_bano_9781411432178_oeb_c3_7)

[Chapter XXXVIII - Rain—One Solitary Meets Another](#Top_of_bano_9781411432178_oeb_c3_8)

[Chapter XXXIX - Coming Home—A Cry](#Top_of_bano_9781411432178_oeb_c3_9)

[Chapter XL - On Casterbridge Highway](#Top_of_bano_9781411432178_oeb_c4)

[Chapter XLI - Suspicion-Fanny Is Sent For](#Top_of_bano_9781411432178_oeb_c4_1)

[Chapter XLII - Joseph and His Burden—Buck’s Head](#Top_of_bano_9781411432178_oeb_c4_2)

[Chapter XLIII - Fanny’s Revenge](#Top_of_bano_9781411432178_oeb_c4_3)

[Chapter XLIV - Under a Tree—Reaction](#Top_of_bano_9781411432178_oeb_c4_4)

[Chapter XLV - Troy’s Romanticism](#Top_of_bano_9781411432178_oeb_c4_5)

[Chapter XLVI - The Gurgoyle: Its Doings](#Top_of_bano_9781411432178_oeb_c4_6)

[Chapter XLVII - Adventures by the Shore](#Top_of_bano_9781411432178_oeb_c4_7)

[Chapter XLVIII - Doubts Arise—Doubts Linger](#Top_of_bano_9781411432178_oeb_c4_8)

[Chapter XLIX - Oak’s Advancement—A Great Hope](#Top_of_bano_9781411432178_oeb_c4_9)

[Chapter L - The Sheep Fair—Troy Touches His Wife’s Hand](#Top_of_bano_9781411432178_oeb_c5)

[Chapter LI - Bathsheba Talks with Her Outrider](#Top_of_bano_9781411432178_oeb_c5_1)

[Chapter LII - Converging Courses](#Top_of_bano_9781411432178_oeb_c5_2)

[I](#h1)

[II](#h2)

[III](#h3)

[IV](#h4)

[V](#h5)

[VI](#h6)

[VII](#h7)

[Chapter LIII - Concurritur—Horse Momento](#Top_of_bano_9781411432178_oeb_c5_3)

[Chapter LIV - After the Shock](#Top_of_bano_9781411432178_oeb_c5_4)

[Chapter LV - The March Following—“Bathsheba Boldwood”](#Top_of_bano_9781411432178_oeb_c5_5)

[Chapter LVI - Beauty in Loneliness—After All](#Top_of_bano_9781411432178_oeb_c5_6)

[Chapter LVII - A Foggy Night and Morning—Conclusion](#Top_of_bano_9781411432178_oeb_c5_7)

[INDEX OF PLACES IN HARDY’S WESSEX NOVELS](#Top_of_bano_9781411432178_oeb_bm)

[ABOUT THE AUTHOR](#Top_of_bano_9781411432178_oeb_at)

[THE WORLD OF THOMAS HARDY](#Top_of_bano_9781411432178_oeb_fm_1)

[AN INSPIRATION FOR FAR FROM THE MADDING CROWD](#Top_of_bano_9781411432178_oeb_bm_1)

[COMMENTS & QUESTIONS](#Top_of_bano_9781411432178_oeb_bm_2)

[FOR FURTHER READING](#Top_of_bano_9781411432178_oeb_bm_3)

[ENDNOTES](#Top_of_bano_9781411432178_oeb_nt)

INTRODUCTION

Jonathan A. Cook

The fourth of Thomas Hardy’s novels to appear in print, Far from the Madding Crowd was the first that indisputably established him as a major writer of English fiction. Hardy had been invited by Leslie Stephen, the editor of the prestigious Cornhill Magazine, to contribute a serialized novel to the magazine. Far from the Madding Crowd subsequently appeared in monthly installments from January through December 1874, and then in a two-volume edition from the magazine’s publisher, Smith, Elder and Company, that November. In America the novel was serialized in four different periodicals and appeared in a one-volume edition from Henry Holt. Based on his growing reputation (and remuneration) as an author, Hardy at the age of thirty-four had married Emma Lavinia Gifford in September 1874 after an extended engagement. Hardy’s favorable personal and professional prospects doubtless gave renewed confidence to his writing and contributed to his largely celebratory portrait of rural life in that region of southwestern England to which he gave the name Wessex in much of his later fiction.

Far from the Madding Crowd was first conceived in late 1872 when Hardy was still finishing A Pair of Blue Eyes, and was composed between the summers of 1873 and 1874 while the author was living at home with his parents in the village of Higher Bockhampton, a few miles northeast of Dorchester in an area of Dorset he knew intimately from birth. Much of the immediate geography and topography of this region provides the setting for the novel, with Dorchester appearing as Casterbridge, Puddletown as Weatherbury, and Weymouth as Budmouth (among other geographical parallels), all according to the imaginary map of Wessex that Hardy developed throughout his career as a novelist. Far from the Madding Crowd is effectively steeped in the agrarian milieu in which Hardy was immersed while composing the novel. Writing indoors and out, Hardy made pencil sketches of some of the local scenes for the novel’s illustrator (a woodcut illustration accompanied each serial installment), and later claimed that he used leaves, woodchips, and even pieces of stone to jot down ideas.

The only significant outside intrusion into the peaceful rural milieu in which Far from the Madding Crowd was written was the suicide in September 1873 of Hardy’s close friend and mentor, Horace Moule, a former classics instructor and at his death a government inspector of workhouses and regular contributor to several leading magazines. Eight years Hardy’s senior, Moule met the young Hardy when he was a teenager working as an architectural apprentice in Dorchester. Moule tutored the intellectually curious young man in the classics, discussed the contemporary literary scene with him, encouraged him to read some of the important thinkers of the day (John Stuart Mill, Charles Darwin, and Auguste Comte, for example), and provided guidance for Hardy’s early literary efforts in both poetry and fiction. A man of diverse talents, Moule suffered from what today would be diagnosed as manic depression aggravated by alcoholism. While his death has been credited with casting an emotional shadow over Hardy’s long career as a novelist and poet, the immediate effect of Moule’s suicide on Far from the Madding Crowd, then in its first stages of composition, was the shaping of the obsessive, near-suicidal character of Boldwood, a figure not included in the original conception of the novel as a love triangle involving Oak, Troy, and Bathsheba. Just as Boldwood is about forty-one when he shoots Troy and then attempts to kill himself, Moule was forty-one when he committed suicide. (Hardy had earlier drawn on aspects of Moule for the character of Henry Knight in his previous novel, A Pair of Blue Eyes.) The tragicomic form of Far from the Madding Crowd thus mirrored the two chief events in the author’s personal life during the composition of the book and its serial publication: the suicide of Moule and Hardy’s marriage to Emma Gifford.

Hardy described his new novel to Leslie Stephen as “a pastoral tale,” and the very title of the novel announced its rural pedigree. The author derived his title from the nineteenth stanza of Thomas Gray’s well-known “Elegy Written in a Country Churchyard” (1751), a pastoral meditation on the undistinguished but not undignified lives of rural dwellers:

Far from the madding [frenzied] crowd’s ignoble strife,

Their sober wishes never learn’d to stray;

Along the cool sequester’d vale of life

They kept the noiseless tenor of their way.

Hardy’s novel hardly presents characters whose “sober wishes never learned to stray”; indeed, misdirected and thwarted desires are the very stuff of the novel’s drama. But he nevertheless gives his rural characters the kind of dignity and humanity that Gray commemorates in his pastoral elegy and that Hardy was bestowing on a new fictional domain based on his native Dorset. The borrowed lines from Gray’s poem may be said to act as a generic marker for Far from the Madding Crowd in that many of the basic elements of plot, characterization, setting, and imagery in Hardy’s novel can be directly linked to the traditions of the literary pastoral. In Far from the Madding Crowd, as in the pastoral tradition generally, humanity lives largely in harmony with nature, and the year is marked by the natural rhythms of the seasons and the labors of agricultural life. In order fully to appreciate the novel as a manifestation of pastoral, it is necessary briefly to review the long literary tradition to which it belonged.

The pastoral tradition in European literature began with the Idylls of the third-century B.C. Greek writer Theocritus, whose poems often focused on the simple lives and loves of shepherds and goatherds, nostalgically recalled from the writer’s native Sicily. The rural subjects of Theocritus’ verse included musical and poetic contests, mythological narratives, seasonal celebrations, and elegiac laments. The tradition of classical pastoral poetry was further elaborated by the first-century B.C. Roman writer Virgil in his ten Eclogues, based on Theocritan models, as well as the Georgics, a four-part didactic poem on the required labors of the agricultural year regarding crops, trees, vines, livestock, and bees. Following Virgil, an implicit assumption of pastoral poetry was that rural life was morally superior to urban civilization. Pastoral literature was revived in the English Renaissance in the work of three of the era’s leading writers: Edmund Spenser’s Shepheardes Calendar (1579), a medley of twelve poems based on Virgil’s Eclogues and featuring song contests, elegies, laments of scorned lovers and frustrated poets, and criticisms of corruption in the late-sixteenth-century English church and state; Sir Philip Sidney’s Arcadia (1590), a long prose narrative, set in an imaginary Greek provincial realm, combining chivalric romance with traditional pastoral interludes, and structured around the principle of rustic retreat from the outside world; and William Shakespeare’s As You Like It (c.1600), a romantic comedy representing the sentimental benefits—and ironic deficiencies—of withdrawal to a sylvan retreat, the imaginary Forest of Arden, from the perilous environs of the court. Pastoral poetry continued to be written through the eighteenth century by Alexander Pope and others, but at the risk of becoming artificially restricted to the classically defined rules of the era. Although anticipated in some of the poetry of Gray, Oliver Goldsmith, and George Crabbe, it was only with William Wordsworth’s re-creation of the pastoral using realistic rural characters and simplified diction that the tradition was renewed and made available to Hardy’s influential precursor George Eliot in her novels Adam Bede (1859) and Silas Marner (1861), and then to Hardy himself, beginning with his second novel, Under the Greenwood Tree (1872), the title of which was based on a line from a song in As You Like It.

In essence, literary pastoral presents an idealized portrait of rural life, in the process offering a systematic preference for country over city, simplicity over complexity, nature over artifice, and tradition over innovation. Explicitly named after the shepherds who formed its first subject matter, pastoral poetry often traced the romantic aspirations and disappointments of simple herders of sheep and goats, whose outdoor work allowed time for music, especially on the pan-pipes or flute, song contests, and debate on various sentimental, agricultural, political, and folkloric topics. The English pastoral novel of the nineteenth century blended some of the idealized themes and motifs of classical and Renaissance pastoral tradition with the more realistic contemporary conditions of the English rural community and natural landscape.

In writing Far from the Madding Crowd, Hardy combined many of the basic themes and motifs of classical pastoral tradition, but synthesized them with a realistic portrayal of contemporary rural English life. The novel’s grounding in pastoral tradition appears in the various farm laborers who perform a choral role in the narrative and exemplify the symbiotic existence of nature and humanity in the novel. It is also evident in the novel’s major characters: the faithful shepherd Gabriel Oak; his “mistress,” the beautiful but capricious farm owner Bathsheba Everdene; her love-sick older admirer, the gentleman farmer William Boldwood; and her selfish, predatory husband, Sergeant Troy, a disruptive antipastoral figure in the novel. In keeping with the seasonal structure underlying some examples of the literary pastoral, the action of the novel mirrors the seasons, as seen, for example, in Oak’s loss of his sheep in the winter, Boldwood’s preliminary courtship in the spring, Bathsheba’s involvement with Troy in the summer, and Fanny Robin’s death in the fall. Also indicative of the pastoral tradition in the novel are the descriptions of the phases of the agricultural year, including lambing, sheepshearing, hay-cutting, beekeeping, and harvesting, as well as of the rural institutions of market and fair.

The most explicit statement of the underlying dichotomies found in the pastoral tradition can be found in chapter XXII of Far from the Madding Crowd, in the description of the great barn where the sheepshearing takes place. The time is the first of June, with “the landscape, even to the leanest pasture, being all health and colour. Every green was young, every pore was open, and every stalk was swollen with racing currents of juice. God was palpably present in the country, and the devil had gone with the world to town” (p. 152). The last sentence is a variation of the poet William Cowper’s well-known assertion in The Task (1785) that “God made the country and man made the town.” In Hardy’s more robust phrasing, nature presents the image of bursting life and health so that the devil is driven to seek out the sophisticated vices of the city with the rest of the “world.” The narrator’s subsequent description of the great stone barn on Bathsheba’s farm presents it as a sacred structure transcending, in its antique beauty and practical function, the superseded institutions of medieval castle and church. The four-hundred-year-old barn and its shearing operations provide the occasion for the narrator to comment on the contrast of country and city, ancient and modern, nature and art, and simplicity and complexity—in short, the basic thematic oppositions of pastoral tradition:

This picture of to-day in its frame of four hundred years ago did not provide that marked contrast between ancient and modern which is implied by the contrast of date. In comparison with cities, Weatherbury was immutable. The citizen’s Then is the rustic’s Now. In London, twenty or thirty years ago are old times; in Paris ten years, or five; in Weatherbury three or four score years were included in the mere present, and nothing less than a century set a mark on its face or tone. Five decades hardly modified the cut of a gaiter, the embroidery of a smock-frock, by the breadth of a hair. Ten generations failed to alter the turn of a single phrase. In these Wessex nooks the busy outsider’s ancient times are only old; his old times are still new; his present is futurity.

So the barn was natural to the shearers, and the shearers were in harmony with the barn (p. 154).

The representation of the shearing supper in the subsequent chapter is the occasion for still another staple of classical pastoral tradition, the song contest. In this scene, Oak, Bathsheba, Boldwood, and the farm workers attain both social and musical harmony, promoted by the various vocalists and Oak’s flute, and underlined by an authorial allusion to Virgil’s sixth Eclogue.

Also in keeping with the explicit or implicit critique of urban civilization in literary pastoral is the later verbal portrait of the city of Bath by the “excitable” young shepherd Cainy Ball, who had gone to the famous health resort for medical treatment and had seen Troy and Bathsheba there together, indicating that their relationship had matured and perhaps been sexually consummated. As he breathlessly tells his audience of fellow workfolk (including Gabriel Oak) during a pause in their reaping, he saw Bathsheba in “a beautiful gold-colour silk gown” (p. 234) walking the streets there with the red-jacketed Troy. And while on a sight-seeing visit to a Bath church he noted how the minister “would kneel down and put up his hands together, and make the holy gold rings on his fingers gleam and twinkle in yer eyes, that he’d earned by praying so excellent well!” (p. 234). The sartorial and ecclesiastical “gold” that Cainy Ball sees in Bath may be impressive to the naive young shepherd, but it is more troubling to the reader (and Oak) as symptomatic of a moral decline in both an infatuated Bathsheba and in the ostentatious pastor of the fashionable city church.

If Hardy presents the inherent dichotomies of pastoral tradition in his use of setting in Far from the Madding Crowd, the tradition also influences the novel’s characterizations. Most noticeably, in the person of the faithful shepherd Gabriel Oak, Hardy has embodied the virtuous simplicity and kinship with nature that pastoral tradition promotes, as against the sophisticated corruption and urbane artifice found in the novel’s chief villain, Sergeant Troy. Gabriel Oak’s qualifications as a hero of pastoral are manifold, beginning with his fundamentally “static” nature: “Although if occasion demanded he could do or think a thing with as mercurial a dash as can the men of towns who are more to the manner born, his special power, morally, physically, and mentally, was static, owing little or nothing to momentum as a rule” (p. 20). Comfortable in his old clothes, Oak prefers to tell the time from the heavens instead of his watch. Like the traditional shepherd of pastoral literature, Oak plays the flute in his leisure moments. An intelligent but minimally educated countryman of twenty-eight, Oak possesses a library that is limited to works essential to his calling, as well as a dictionary, an arithmetic text, and such venerable English classics as John Milton’s Paradise Lost (1667), John Bunyan’s The Pilgrim’s Progress (1678, 1684), and Daniel Defoe’s Robinson Crusoe (1719). One indication of Oak’s appealing—and in this case, amusing—lack of sophistication is evident when he dresses up to propose to Bathsheba, for after he spruced up his attire, the oil he applied to his hair “deepened it to a splendidly novel colour, between that of guano and Roman cement, making it stick to his head like mace round a nutmeg, or wet seaweed round a boulder after the ebb” (p. 35). Oak is rejected but reacts with dignity, and though nursing an unrequited love for his “mistress” like the traditional lovelorn swain of pastoral literature, he is later still able to give Bathsheba honest advice about both the running of her farm and her sentimental affairs. Oak is, above all, a man who is firmly in touch with nature and its challenges: He knows how to preserve Bathsheba’s ricks from fire and storm, and her sheep from disease. He also functions as a center of altruistic, humane values by variously serving the interests of Bathsheba, Boldwood, Fanny Robin, and his fellow farm workers.

As the embodiment of antipastoral values, Sergeant Francis Troy is an agent of anarchic destruction in the novel, being the ultimate cause of Fanny Robin’s death, Boldwood’s homicidal derangement, and Bathsheba’s emotional devastation. Named after a city famous for abduction, war, and destruction in the ancient world, Troy is initially associated with the garrison towns of Casterbridge and Melchester through his mounted military corps, the Eleventh Dragoon Guards. (The city of Troy’s catastrophic fall was famously recounted in Virgil’s Aeneid, which Hardy knew from boyhood; moreover, Bathsheba’s infatuation with Troy recalls the Carthaginian queen Dido’s fatal attraction to the Trojan hero Aeneas, as depicted in books 1 and 4 of Virgil’s epic.) The son of a philandering aristocrat and a French governess, Troy is both a polished man of the world and an amoral predator, his character being distinguished by a self-centered insincerity that finds its chief outlet in seduction. “He was a fairly well-educated man for one of middle class—exceptionally well educated for a common soldier. He spoke fluently and unceasingly. He could in this way be one thing and seem another; for instance, he could speak of love and think of dinner; call on the husband to look at the wife; be eager to pay and intend to owe” (p. 178). Not surprisingly, the horizon of Troy’s activities is always the present moment. “With him the past was yesterday; the future, to-morrow; never, the day after” (p. 177). It is typical of Troy’s investment in the present that after his marriage to Bathsheba he immediately wants to renovate what he calls Bathsheba’s “rambling, gloomy, house” by having “these old wainscoted walls brightened up a bit; or the oak cleared quite away, and the walls papered” (pp. 248—249). Troy is sharing his thoughts as a new proprietor with Bathsheba’s shepherd on his first morning in the house, and his desire for the elimination of “oak” in the house is telling in more than one sense. Unlike Gabriel Oak, who accurately predicts the storm that would break on the night of the harvest supper, Troy insists it won’t rain and so is unwilling to interrupt his drunken revelry to help Oak secure the ricks. A man seemingly devoid of conscience, Troy does experience one episode of compunction upon discovering Fanny Robin’s death in childbirth, although even here it is the occasion for Troy’s deliberate cruelty to his wife. Troy’s purchase of an elaborate gravestone for Fanny is a belated sentimental memorial to his discarded mistress; yet he has deceptively obtained from his wife most of the money to pay for it. His subsequent attempt to plant flowers on Fanny’s grave, which is freakishly destroyed overnight by flooding from a church tower rainspout, confirms the fact that Troy is by nature an anarchic, antipastoral intruder into the world of Weatherbury Upper Farm.

Beyond the novel’s principal characters lies the realm of rustic farm workers who have a variety of functions in the novel, beginning with their colorful enhancement of its pastoral theme. Simple sons and daughters of the soil who speak the pungent dialect of their native region, the rustics constitute a community of individuals tied to the immemorial rhythms of the agricultural year and the forces of tradition, while the repeated Old Testament allusions in the novel (including the names of many of the characters) evoke the pastoral world of the early biblical patriarchs. As a dramatic “chorus,” the farm workers comment on the major developments in the plot, such as Bathsheba’s initial takeover of Weatherbury Upper Farm, Boldwood’s matrimonial pursuit, Bathsheba’s ill-advised marriage to Troy, Fanny Robin’s death, and Troy’s mysterious return from the dead. These characters also offer comic relief, folk wisdom, conventional and unconventional religious opinion, and a rich variety of personality types and temperaments, from the feckless but endearing Joseph Poorgrass to the astute Jan Coggan, from the shamelessly dishonest bailiff Pennyways to the childishly innocent (and so misnamed) Cain Ball. Making up a close-knit community of workers with a shared sense of tradition, the rustic characters give no hint of the economic hardship for agricultural labor that was developing in Hardy’s native Dorset while the novel was written, and that would become a major problem throughout England in the last two decades of the nineteenth century and well into the twentieth. But references in the narrative suggest that the story was set in the mid-to-late 1860s when conditions were slightly less severe. In any case, the village of Weatherbury is an organic, largely preindustrial community deliberately infused with a pastoral innocence and simplicity. Hardy’s rustics are thus akin to Shakespeare’s in their apparently timeless thematic and dramatic functions at the base of the social pyramid.

Thomas Hardy’s fiction is well known for its dramatization of the forces of chance, coincidence, and circumstance in the shaping of human destiny, the traditional providential scheme of Christianity being replaced in his fiction by an unsettling Darwinian world of radical contingency. Far from the Madding Crowd illustrates this tendency, although the destructive forces of chance are not so relentless as in many of Hardy’s later novels. They are nevertheless decisive in influencing the course of events. Thus, Oak’s loss of his sheep because of his ill-trained sheepdog wipes out the substantial investment he had made in becoming an independent farmer. Fanny Robin’s innocent mistake about the name of the church where she is to meet Troy seals her fate as a discarded bride and unwed mother. Bathsheba’s arbitrary decision to send Boldwood a valentine leads to his self-destructive romantic obsession and her morally debilitating sense of responsibility for his unwanted attentions. Troy’s accidental entanglement with Bathsheba’s dress on a dark lane results in their disastrous marriage, and the ruination of Boldwood’s life. Joseph Poorgrass’s weakness for liquor leads to Fanny Robin’s body being kept overnight in Bathsheba’s house, and the latter’s devastating discovery of the dead woman’s true relation to her husband. After he has walked out on his wife, Troy’s chance rescue at sea while swimming sets him on a new tack that will ultimately lead to his death when he returns home to reclaim her—yet it is only because he causes Bathsheba physical pain by grabbing her wrist that Boldwood impulsively shoots his rival. On the other hand, a number of chance events in the novel can ultimately lead to different outcomes depending on the moral complexion of the character affected. Oak overcomes the loss of his sheep and early rejection by Bathsheba through resilience of spirit. Troy, by contrast, superciliously jilts Fanny Robin for her pardonable error in mistaking the church, and later interprets the accidental destruction of her grave by torrential autumn rains as a sign that his brief attempt at remorse and moral reform is useless.

While revealing the important role of contingency in the shaping of human destiny, Far from the Madding Crowd is also notable for its schematic pairing of events, a narrative technique providing ironic contrast, thematic balance, and dramatic unity. Thus, the shooting of Oak’s dog early in the novel parallels the shooting of Troy near its end. Oak’s early proposal to Bathsheba and its flirtatious rejection anticipates Boldwood’s subsequent try for her hand. Fanny Robin is late first to her wedding and again to her own funeral, while the grotesque “jack” telling the hours in the church where Troy waits for Fanny is symbolically related to the grotesque gargoyle that spits water on her grave. Boldwood’s violent jealousy of Troy is paralleled by Bathsheba’s jealousy of the dead Fanny Robin. Bathsheba’s initial “seduction” by Troy during his sword exercise occurs in an outdoor setting comparable to the one where she spends the night after her relationship with her husband has been destroyed. So, too, Troy’s expert performance of the sword exercise for Bathsheba anticipates his later circus performance as the daring highwayman Dick Turpin. The scene of innocent drinking and storytelling at Warren’s Malthouse early in the novel parallels a later, more irresponsible scene of drinking at the Buck’s Head Inn—just as the innocent shearing supper is followed by the decadent harvest supper. The Casterbridge hiring fair where Gabriel tries to hire himself out parallels the Greenhill sheep fair where he accompanies Bathsheba to market her sheep. Troy’s humiliation of Boldwood after he (Troy) marries Bathsheba anticipates his subsequent dramatic intrusion at Boldwood’s Christmas party. Finally, just as the novel commences with Oak’s first meeting with Bathsheba in the month of December, soon followed by his unsuccessful proposal, it concludes at roughly the same date three years later with Bathsheba’s implied invitation for Oak to renew his request, leading to their final happy union.

Both the plot and character types in Far from the Madding Crowd have sometimes been compared to those found in traditional balladry and theatrical melodrama, with their shared reliance on stereotype and sensation. Thus we find in the novel the faithful and enterprising lover (Oak), the captivating but misguided heroine (Bathsheba), the smooth-tongued rake (Troy), the jealous older suitor (Boldwood), and the ruined maiden (Fanny). Yet Hardy, like his predecessor Charles Dickens, transforms what might superficially appear to be stereotype and melodramatic convention into high literary art. Like much of his other fiction, Far from the Madding Crowd presents a taxonomy of creative and destructive love, with Bathsheba’s three suitors exhibiting different forms of male desire, from unthinking lust in Troy, to sublimated idealization in Boldwood, to open-eyed devotion blending values of intelligence and commitment in Oak. At the center of this romantic trio is the captivating Bathsheba Everdene, whose moral education throughout the novel extends from narcissistic caprice, to painful self-knowledge, to chastened realization that her original suitor—who has undergone his own ordeal of quiet suffering—was also her wisest and most emotionally fulfilling choice. With an assertive personality and no parents or siblings to guide her choices, Bathsheba is seemingly fated to commit folly when her feminine vanity is misdirected toward Boldwood, and, more seriously, when her sexual innocence is exploited by Troy. In essence, Bathsheba’s nature is divided between the desire for chaste self-sufficiency and erotic dependence. Considered in terms of classical mythology (which plays a significant role in the novel), she is thus poised between the goddesses Diana (Artemis) and Venus (Aphrodite), exemplars of chaste independence and physical passion, respectively.

The trajectory of Bathsheba’s emotional and psychological development can be measured at several crucial points in the novel. Oak first sees Bathsheba admiring herself in the mirror while confidently imagining herself in “far-off though likely dramas in which men would play a part” (pp. 14—15). Far from offering easy self-satisfaction, however, Bathsheba’s romantic dramas lead first to her irresponsible, morally problematic arousal of Boldwood’s passion, and then to her gratuitous victimization by the sexual predator Troy. Bathsheba confesses to Oak on the night of the harvest supper that her marriage to Troy in Bath was precipitated by sexual jealousy, demonstrating that she has attained a measure of self-recognition of her capacity for folly. After Troy’s disappearance and possible death, Bathsheba took “no further interest in herself as a splendid woman,” for “her original vigorous pride of youth had sickened” (p. 337); but she is once again confronted with the problem of Boldwood’s obsessive interest in her. Only with the accidental elimination of both Troy and Boldwood from her life can she fully grieve over the calamities of her romantic history and begin to move beyond the emotional and psychological limitations of sexual jealousy and guilt. Thus, during the first summer of her widowhood she breaks down when hearing the choir children singing the hymn “Lead, kindly Light” in the Weatherbury church and immediately encounters Gabriel Oak—the narrative exemplar of “light” in the form of selfless love and practical intelligence—who will lead Bathsheba to the altar a few months later.

Whether one views her as an independent-minded feminist role model undone by wayward male desire, or as a morally capricious beauty whose narcissistic pride occasions her fall, Bathsheba is a beguiling, self-divided heroine who offers the reader a number of interpretive vantage points. One of these would include her affiliation with the archetypal figure of Eve, as well as with her actual biblical namesake, another Old Testament heroine associated with temptation, fall, and eventual redemption. Hardy was steeped in the language and narrative traditions of the King James Bible (just as he was steeped in classical literature and mythology), and traces of its influence can be found throughout Far from the Madding Crowd. Bathsheba’s family name, Everdene, incorporates the names of both “Eve” and “Eden,” and latent within her character are traces of both the biblical and Miltonic Eve, while the pastoral world of Weatherbury Upper Farm is the Eden in which Bathsheba experiences her precipitous moral fall. Our first image of Bathsheba in chapter I, mediated through Gabriel Oak’s gaze, is of a beautiful young woman sitting in a wagonload of household goods, flowering plants, and pets, looking at herself in the mirror: “Woman’s prescriptive infirmity had stalked into the sunlight, which had clothed it in the freshness of an originality” (p. 14). Lest we miss what this female infirmity might be, Gabriel Oak announces it at the end of the chapter: “Vanity.” Significantly, in Milton’s Paradise Lost, which Hardy appears to have been reading while composing Far from the Madding Crowd, the newly created Eve’s first act is to admire her reflection in the water of a lake (book 4, lines 449-475), in the manner of the classical figure of Narcissus, who eventually drowned while doing so. Bathsheba Everdene’s initial weakness, then, is her narcissistic self-regard, which makes her seek admiration from—but not submission to—men such as Oak and Boldwood, and which will eventually make her catastrophically vulnerable to flattery and sex appeal in the person of a Sergeant Troy.

In chapter II, while Bathsheba and her aunt tend a sick cow in a shed one night, Oak is described as secretly looking at her through the low roof “in a bird’s eye view, as Milton’s Satan first saw Paradise” (p. 22), an allusion from Paradise Lost (book 4, lines 94—96) suggesting the Eve-like allure that Bathsheba now embodies for the previously self-sufficient young shepherd. Oak soon falls in love with this beguiling, dark-haired beauty after further undetected observations, and especially after she has saved him from asphyxiation in his small shepherd’s hut. But when he subsequently proposes to Bathsheba, her “vanity” is again in evidence when she lets him describe in detail what he has to offer her as a husband, only to refuse his offer while displaying a self-centered independence. Thus, she wants to be a bride if she “could be one without having a husband. But since a woman can’t show off in that way by herself, I shan’t marry—at least yet” (p. 39).

After she inherits her own farm in nearby Weatherbury, Bathsheba is able to indulge her vanity to more dangerous effect when she sends a valentine to Farmer Boldwood, who has failed to admire her along with the other men at the Casterbridge Corn (that is, grain) Exchange. Bathsheba’s valentine is a playful, Eve-like temptation for which Boldwood falls completely, being unaware of the circumstances in which it was sent and mysteriously moved by its provocative invitation to marry the anonymous sender. The description of the valentine on Boldwood’s mantel makes it akin to the apple of temptation, as the farmer’s gaze becomes transformed by its fascinating appeal as he eats his meal: “Here the bachelor’s gaze was continually fastening itself, till the large red seal became as a blot of blood on the retina of his eye; and as he ate and drank he still read in fancy the words thereon, although they were too remote for his sight” (p. 107). Boldwood’s subsequent awakening to Bathsheba’s physical presence is described as akin to that of Adam after God has put him to sleep and extracted his rib to create Eve (Genesis 2:21-22): “Adam had awakened from his deep sleep, and behold! there was Eve” (p. 125). For Boldwood, an awakening to romantic love and a psychological fall from innocence ironically occur at the same moment.

If Bathsheba’s valentine brings about Boldwood’s ultimately lethal “fall” to her feminine allure, Bathsheba’s own fall will begin after her accidental encounter with Troy on the night of the shearing supper, when the soldier’s spur becomes caught in the hem of her dress and she becomes temporarily “hitched” to him. The embarrassing entanglement gives Troy an opportunity to express a shameless appreciation of her beauty: “I’ve never seen a woman so beautiful as you. Take it or leave it—be offended or like it—I don’t care” (p. 174). Eve’s fall in Eden was predicated on the flattering lies of Satan (in the form of the serpent), which appealed to Eve’s vanity, as recounted in chapter 3 of Genesis, and more fully related in book 9 of Milton’s Paradise Lost. Satan tells Eve in Milton’s poem: Troy’s mellifluous flatteries in chapter XXIV of Hardy’s novel and in a later scene of haymaking have their effect on Bathsheba as she succumbs to his charms, while her complete psychological prostration before him occurs during the sword exercise that she invites Troy to perform. The lushly described fern hollow in which the exercise takes place constitutes an ironic version of the sheltered locus amoenus (“lovely place” or “bower of bliss”) of pastoral tradition, while Troy’s virtuosic display of his military swordsmanship around the perimeter of Bathsheba’s body is a scene of symbolic sexual violation, as conveyed, for example, by Troy’s final killing of the caterpillar on her bodice: “She saw the point glisten towards her bosom, and seemingly enter it. Bathsheba closed her eyes in the full persuasion that she was killed at last” (p. 197). Before he leaves, Troy gives her a lingering kiss—her first such experience—which “brought the blood beating into her face” and “brought upon her a stroke resulting... in a liquid stream” (pp. 198-199). The language throughout the chapter is similarly evocative of sexual congress and conquest. From this point on, Bathsheba is in Troy’s power, and no amount of persuasion by her admirer Oak or her servant Liddy can help her from helplessly falling for Troy: “Bathsheba loved Troy in the way that only self-reliant women love when they abandon their self-reliance. When a strong woman recklessly throws away her strength she is worse than a weak woman who has never had any strength to throw away” (p. 200).

But all that fair and good in thy Divine

Semblance, and in thy Beauty’s heav’nly Ray

United I beheld; no Fair to thine

Equivalent or second, which compell’d

Mee thus, though importune perhaps, to come

And gaze, and worship thee of right declar’d

Sovran of Creatures, universal Dame (lines 606-612).

The redemptive phase of Bathsheba Everdene’s moral education comes only with her suffering after Troy’s death, at which time she goes from being an errant Eve to a long-suffering Mary figure, thereby duplicating a tradition in Christianity that paired the two women as moral complements, one the bringer of sin into the world, the other the woman who gave birth to the man who would redeem the world from sin. Immediately after her husband has been shot, Bathsheba is transformed from a state of shock at his mysterious return, to self-possessed care over his dead body. “She was sitting on the floor beside the body of Troy, his head pillowed in her lap, where she had herself lifted it” (p. 392). The attitude is that of Mary over the body of the dead Christ, a familiar scene in Christian art best known from Michelangelo’s Pietd. The reader’s next view of Bathsheba after the scene of Troy’s death occurs the following August when she is seen reading the inscription on Troy’s gravestone below that of Fanny Robins—evidence of a selfless decision that her dead husband’s body really belonged to Fanny, not herself, as he himself claimed.

It should be noted that when Bathsheba now discovers Gabriel Oak’s plan of emigrating to California, she herself is momentarily cast in a Christ-like role when she is pained by the idea that “her last old disciple was about to forsake her and flee” (pp. 404—405), just as all Christ’s disciples fled before his arrest (Matthew 26:56; Mark 14:50). But when Oak subsequently gives notice to her in December of his intention to quit, Bathsheba’s desolating sense of loneliness again recalls her affinity with Milton’s Eve; for after Adam has threatened to abandon her following the announcement of the penalties for their transgression in Eden, Eve cries out in Milton’s poem:

Forsake me not thus, Adam, witness Heav’n
What love sincere, and reverence in my heart
I bear thee, and unweeting have offended,
Unhappily deceiv’d; thy suppliant
I beg, and clasp thy knees; bereave me not,
Whereon I live, thy gentle looks, thy aid,
Thy counsel in this uttermost distress,
My only strength and stay: forlorn of thee,
Whither shall I betake me, where subsist? (book 10,
lines 914—922).

Upon receipt of Gabriel’s formal letter of notice, Bathsheba is similarly “aggrieved and wounded” that the termination of Gabriel’s devotion, “which she had grown to regard as her inalienable right for life, should have been withdrawn just at his own pleasure in this way. She was bewildered too by the prospect of having to rely on her own resources again” (p. 406). Like Adam yielding to Eve’s pitiful plea with a renewal of conjugal affection (but not suffering Adam’s disillusioning experience with Eve), Gabriel ultimately yields to Bathsheba’s wish that he not abandon her; indeed, her visit to his residence, “in a hunger for pity and sympathy,” leads to a marriage proposal that will effectuate their permanent union. From the beginning to the end of Hardy’s narrative, then, Bathsheba’s moral career can be fruitfully compared with the archetypal figure—both biblical and Miltonic—of Eve.

As previously noted, in addition to her Eve-like susceptibilities, Bathsheba Everdene bears a first name that allies her to another famous Old Testament woman associated with sin and seduction. This is the Bathsheba who caused David to sin after he first viewed her bathing: “and from the roof he saw a woman washing herself; and the woman was very beautiful to look upon” (2 Samuel 11:2). The Hebrew king conceived a child with Bathsheba and then engineered the death in battle of her husband Uriah the Hittite, one of David’s generals. David’s unholy actions aroused the opposition of the prophet Nathan, who told David a parable of a rich man who unfairly devotes to his own use a poor man’s “one little ewe Lamb” instead of a lamb from his own ample flock. David recognizes the implied rebuke, but God still punishes him with the death of his child by Bathsheba. The Hebrew king and his wife, however, produce a second child, Solomon, who, aided by his mother’s diplomatic skills, goes on to inherit the throne and earn a reputation for supreme wisdom.

We are told early in the novel that Bathsheba Everdene’s father could remain faithful to his wife only by pretending he wasn’t married to her, so his daughter’s biblical given name was perhaps another symptom of her father’s peculiar adulterous affections. But Bathsheba Everdene’s given name is relevant to the tenor of the novel in more ways than one. Like King David, Gabriel Oak is a shepherd whose early glimpses of Bathsheba Everdene all have a voyeuristic component, especially his glimpse of her provocative postures on horseback when riding by him without being aware of his presence. But it is only later in the novel, after she meets Sergeant Troy, that Bathsheba becomes involved with a figure who recalls the Hebrew king’s sinful susceptibility to feminine allure. Ironically, Troy echoes the prophet Nathan’s words to King David when he complains that Bathsheba, by refusing to hear his flatteries, wants to “take away the one little ewe-lamb of pleasure” (p. 186) that he has in his monotonous military life. But it is Troy himself who, like a second David, will deprive Boldwood (another Uriah) of Bathsheba’s hand; and it is the shepherd Oak, like the biblical prophet, who warns Bathsheba against her infatuation with Troy and her injustice to Boldwood. Bathsheba can learn wisdom, however, only after committing the egregious folly of marrying Troy even though she’s aware of his defects of character. Her eventual marriage to Gabriel restores to her the original “pastoral king” who has loved her all along, and with whom she will allegedly enjoy a love comparable to that found in the Song of Solomon, the poem purportedly written by David and Bathsheba’s famous son to express a love “as strong as death” and which “many waters cannot quench, nor the floods drown” (p. 409).

We have already seen that Bathsheba’s Eve-like characteristics involve Francis Troy as the Satan figure who brings about her moral fall. Troy is in fact both explicitly and implicitly associated with Christianity’s archetypal villain at several points in the novel, thus providing a biblical prototype for his amoral self-indulgence. The familiar form of Troy’s first name, Frank, is ironic in view of his freely indulged habit of lying to women, a strategy that gives him great power over Bathsheba, for “that a male dissembler who by deluging her with untenable fictions charms the female wisely, may acquire powers reaching to the extremity of perdition, is a truth taught to many by unsought and wringing occurrences” (p. 179). Troy continues his campaign of flattery while helping with haymaking on Bathsheba’s farm, at which time he convinces her that his praise of her beauty is acceptable because he is only repeating what other men have said about her—a key concession that will allow him to continue his line of attack, knowing that she is now in a position to capitulate: “The careless sergeant smiled within himself, and probably too the devil smiled from a loop-hole in Tophet [i.e., hell], for the moment was the turning-point of a career” (p. 184). Speaking to his fellow farm workers, the rustic Matthew Moon comments on the appeal that a military rake like Troy might have on Bathsheba, calling him “your man of sin” (p. 235), a well-known apocalyptic term for the devil (2 Thessalonians 2:3). After Troy’s marriage to Bathsheba in the city of Bath he returns to her house in Weatherbury in the evening; and during his encounter with Boldwood, who is still uninformed of his marriage, Troy assumes the role of satanic trickster. He pretends to accept money to marry Fanny Robin, then agrees to marry Bathsheba for another monetary reward after Boldwood realizes that Bathsheba is already involved with Troy in a potentially compromising sexual relationship. Troy’s sadistic and jealousy-inducing manipulation of Boldwood evokes the comparable manipulations of the older, romantically inexperienced Othello by his amoral ensign Iago; it also earns Troy the deserved appellations of “devil” (p. 243) and “juggler of Satan” (p. 246) from Boldwood after Troy has triumphantly revealed the newspaper announcement of his marriage to Bathsheba.

Troy’s powers of debasing enchantment are again on display when he turns the harvest celebration into a drunken orgy, so that when Gabriel Oak tries to get help to cover the ricks he finds the barn full of soporific men whose bodies have been symbolically bewitched: “Here, under the table, and leaning against forms and chairs in every conceivable attitude except the perpendicular, were the wretched persons of all the work-folk, the hair of their heads at such low levels being suggestive of mops and brooms” (p. 256). Troy is blithely indifferent to the havoc he brings into Bathsheba’s life, and his fading interest in his wife finds a new focus with the reappearance of Fanny Robin. Just as he had tortured Boldwood by manipulating the latter’s interest in protecting Fanny Robin and Bathsheba from his (Troy’s) depredations, Troy now tortures Bathsheba’s affections by claiming that the dead Fanny is his true wife: “This woman is more to me, dead as she is, than ever you were, or are, or can be. If Satan had not tempted me with that face of yours, and those cursed coquetries, I should have married her” (p. 312). That Troy attributes his mistakes to the archdeceiver is a symptom of self-deception compatible with his other moral enormities. With his first appearance to Bathsheba occurring in pitch dark, Troy is a kind of “demon lover”; his frequent change of roles in the novel—soldier, gentleman farmer, sailor, transatlantic professor of gymnastics, highwayman—circus performer—are also suggestive of the devil’s varied guises as well as the opportunism of a talented scoundrel. When Troy appears in his last role as a husband returned from the dead, he has well earned the revenge of his romantic nemesis Boldwood.

If Troy is the novel’s sensualist who lives for immediate gratification, Boldwood is its romantic idealist, whose courtship of Bathsheba is an exercise in deferred gratification. A forty-year-old bachelor farmer when we first meet him, Boldwood is a remarkable study in emotional repression, romantic obsession, and what today would be diagnosed as clinical depression, all leading to Boldwood’s eventual moral and psychological collapse. “His equilibrium disturbed, he was in extremity at once. If an emotion possessed him at all, it ruled him; a feeling not mastering him was entirely latent” (p. 129). In the narrator’s initial description of his person, Boldwood is depicted as “a gentlemanly man, with full and distinctly outlined Roman features” (p. 100), and before his involvement with Bathsheba he has led a life of stoic self-restraint. (Boldwood’s biographical model, Horace Moule, published a textbook, The Roman Republic, in 1860 and later gave Hardy a copy of Marcus Aurelius’ Meditations, a classic text of Roman Stoicism that Hardy treasured throughout his life.) A solitary man long denied an outlet for his emotions, Boldwood’s psychological balance is overthrown by the arrival of Bathsheba’s frivolous valentine, which initiates his career as a perpetually frustrated aspirant to Bathsheba’s hand. As an older bachelor who had ignored Bathsheba’s beauty in the Casterbridge market, Boldwood is the victim of a sentimental nemesis in the form of a valentine, just as in classical literature those who ignored Venus (Aphrodite), the goddess of love, were subject to her cruel and sometimes fatal revenge. In Boldwood’s case, the idea of Bathsheba’s potential interest in him is literally an eye-opening experience, except that Boldwood never really sees into Bathsheba’s heart but only projects his own desires onto her.

At the sheepshearing supper Boldwood comes close to getting Bathsheba to agree to an engagement, but the unexpected arrival of Troy in Bathsheba’s life that night initiates a phase of jealousy leading to a gradual breakdown in his personality, most conspicuous in his indifferent sacrifice of his crops on the night of the harvest celebration, with its violent storm. (Paralysis of willpower is one of the symptoms of clinical depression.) Troy’s unexpected disappearance from Bathsheba’s life gives Boldwood the opportunity to renew his obsessive courtship. But he is again preempted by Troy’s ghostly return during Boldwood’s Christmas party, in a scene reminiscent of the specter lover or bridegroom of German Romantic balladry and Gothic romance, confirmed by Troy’s mocking allusion to “Alonzo the Brave” (a ballad by Matthew G. Lewis [1775—1818]) just before his unexpected advent. Boldwood’s self-destructive obsession with Bathsheba before Troy’s fateful return is substantiated by the later discovery of his secretive purchase of expensive clothing and jewelry for her, in anticipation of his hypothetical marriage six years in the future.

Bathsheba’s final choice in marriage, of course, is the faithful shepherd Gabriel Oak, who proposed to her early in the novel and persists in his selfless devotion throughout her entanglements with Boldwood and Troy. If Gabriel Oak’s last name evokes his earthbound strength of character, his first name relates him to the order of angels. (The implications of durability in the name “Oak” also suggest the author’s surname of “Hardy,” and certain aspects of Hardy’s personality and biography undoubtedly informed Oak’s character and history.) In the Old Testament the angel Gabriel expounds a vision of the end time for the prophet Daniel (Daniel 8:16—27, 9:21—27), while in the New Testament the angel Gabriel announces the birth of Jesus to Mary (Luke 1:26—38). Like the Old Testament angel Gabriel, Gabriel Oak is gifted with the ability to read important premonitory signs in both heaven and on earth, while on at least two occasions Oak also mimics the actions of his New Testament namesake. Thus, when he makes his initial, unsuccessful proposal to Bathsheba, Gabriel ends his depiction of the benefits of marrying him with the thrill of announcing in the newspapers “the babies in the births—every man jack of ’em!” (p. 39). Bathsheba, however, receives Gabriel’s prediction of future male children not with the awe of the Virgin Mary, but with a casual rejection of him as a suitor. (Earlier, in chapter II, Gabriel had mistaken for a star the light coming from the shed where Bathsheba was nursing a sick cow with her newborn calf, suggesting a parallel to the shepherds who worshiped at the scene of the Nativity.) Later in the novel, after Fanny Robin has died, Gabriel once again mimics the role of the annunciatory angel in the Gospel of Luke, except here it is to suppress the announcement of a child’s birth, as Oak in chapter XLII wipes out the chalk scrawl “and child” from the top of Fanny’s coffin in order to spare Bathsheba the knowledge of Fanny’s illegitimate child by Troy.

While the biblical associations of the angel Gabriel would seem to have influenced some aspects of the depiction of Gabriel Oak, the image of the angel Gabriel in Milton’s Paradise Lost, where he guards the gate of Paradise against the intrusion of Satan, may have been equally important for Hardy. Like his heavenly namesake, Oak selflessly stands watch over Bathsheba’s life, criticizing her frivolous treatment of Boldwood, warning her against the predatory Troy, and trying to keep her from discovering the existence of Fanny Robin’s child. Oak also faithfully guards the products of Bathsheba’s farm. So we see him nurturing lambs, shearing sheep, and curing their sickness, as well as saving his mistress’s ricks from both fire and storm. Gabriel’s Miltonic role is particularly evident in the latter scenes, for just as the angel Gabriel fights the demonic host of fallen angels in Paradise Lost, the destructive fire and storm in Far from the Madding Crowd appear as demonic forces when, for example, the burning ricks that Gabriel has accidentally discovered exhibit “knots of red worms,” “imaginary fiery faces,” and “other impish forms” (p. 53). So, too, during the fierce late-summer storm eight months later, the initial hot breeze seems “as if breathed from the parted lips of some dragon about to swallow the globe” (p. 257), while the lightning subsequently appears like “a perfect dance of death. The forms of skeletons appeared in the air, shaped with blue fire for bones” (p. 262). Oak’s improvised lightning rod protects Bathsheba and himself from the deadly threat of this cosmic danse macabre.

Still another biblical aspect of Gabriel Oak’s vigilant care for Bathsheba’s farm is his role of “good shepherd.” In the New Testament, Jesus presents himself as the “good shepherd” who “giveth his life for the sheep” (John 10:11). The most overt dramatization of Oak’s role of “good shepherd” occurs in chapter XXI, after Bathsheba’s sheep have eaten clover and are threatened with a lethal condition of gaseous swelling. Oak had recently been dismissed by Bathsheba for presuming to criticize her ungenerous treatment of Boldwood, but she is now forced to call him back since he is the only one who knows how to cure the sheep. After first refusing to come, a rebuke to her haughty command, he arrives after she has softened the wording of her request. Significantly, the day is Sunday, and when Oak arrives he carries “the instrument of salvation” in the form of a “trochar,” which he will insert into the sheep’s swollen side to release the entrapped gas. The whole operation suggests an implied parody of the tradition of the “good shepherd” as Gabriel ministers to Bathsheba’s strayed flock of sheep by using a medical substitute for a crucifix (Christianity’s “instrument of salvation”) to save the stricken animals.

Although Oak often appears as a kind of priest of nature and secular saint in the novel, he is also a fallible human being; thus in some respects, he is an Adam figure to Bathsheba’s Eve. The portrait of Oak in the first chapter presents a character who, though of “good general character,” is subject to differing evaluations by his community such that the narrator must conclude that Oak is “a man whose moral colour was a kind of pepper-and-salt mixture” (p. 11). The broad terms in which Oak is depicted here suggest that Oak is an Everyman figure akin to humanity’s archetypal progenitor. In keeping with Oak’s morally innocent state, the nighttime world represented in the second chapter, occurring on the eve of December 21 (the shortest day of the year), evokes a cosmic scene in which the primeval stellar universe is in symbiotic rapport with humanity: “The sky was clear—remarkably clear—and the twinkling of all the stars seemed to be but throbs of one body, timed by a common pulse” (p. 18). The accompanying depiction of Oak’s nighttime flute-playing, his rudimentary, ark-like shepherd’s hut, and his solicitous care for his lambs all convey the image of a benevolent, solitary, and prototypical rural man—an idyllic image that will soon be compromised by Oak’s interest in the attractive young woman inhabiting the neighboring farm.

Oak’s eventual “fall” after the death of all his sheep in chapter V—a calamity that immediately follows his failed proposal in chapter IV—is ostensibly socioeconomic, but the experience of nature’s casual destructiveness brings about a change in Oak’s consciousness comparable, we might say, to the discovery of sin and death in Eden; thus, Oak’s glimpse into the “pit” in which the sheep have fallen yields the indelible image of “the attenuated skeleton of a chrome-yellow moon” in an adjacent pond, which “glittered like a dead man’s eye.... All this Oak saw and remembered” (p. 46). Oak’s subsequent loss of professional status as an independent farmer may also remind us that the penalty of Adam’s fall was an acquaintance with sorrow and the need to labor for his living (Genesis 3:17—19). Oak’s appearance at the Casterbridge hiring fair confirms that such a transformation has taken place, for he “was paler now. His eyes were more meditative, and his expression was more sad” (p. 47). In Oak’s case, however, the “fall” caused by his loss of sheep was ultimately fortunate (as in the well-known Christian formula of felix culpa) in that it strengthened his character for future ordeals; “thus the abasement had been exaltation, and the loss gain” (p. 47). The “abasement” and “loss,” of course, also inadvertently brought him back into Bathsheba’s presence as her new shepherd.

Oak sees Bathsheba’s faults—primarily the “vanity” he accurately assigns to her in chapter I—but still loves her despite his rejection as a suitor and service to her as an employee, watching her successive involvements with Boldwood and Troy. Oak thus occupies a middle position between the blind idealizations of Boldwood and Troy’s astute exploitation of Bathsheba’s weaknesses. Part of Oak’s strength of character arises from his “quiet modesty” that “seemed continually to impress upon him that he had no great claim on the world’s room” (p. 13), as the narrator notes in chapter I. Later, when Bathsheba goes to ask Oak about a possible connection between the dead Fanny Robin and her husband, she realizes the chief source of Oak’s strength of character was “that among the multitude of interests by which he was surrounded, those which affected his personal well-being were not the most absorbing and important in his eyes. Oak meditatively looked upon the horizon of circumstances without any special regard to his own standpoint in the midst. That was how she would wish to be” (pp. 306-307). Oak, in short, is both an altruist and a realist who sees the world and its inhabitants from a disinterested but not detached perspective.

Oak’s ultimate reward for his labors on behalf of Bathsheba is the unexpected gift of her hand as she emerges out of a year of official mourning for her husband, and after she has imagined that he was about to abandon her—but Oak’s planned departure was only because he didn’t want to confirm the public impression that he had a self-interested motive in remaining as Bathsheba’s employee. Their ensuing union is based on the “compounded feeling” of both love and companionship (“camaraderie”) that has emerged “through similarity of pursuits” (p. 409) in the now-redeemed pastoral world of Weatherbury Upper Farm. The former “pastoral king” (p. 47) and sometime “Queen of the Corn-market” (p. 181) will now run both Bathsheba’s and Boldwood’s farms as devoted partners.

Far from the Madding Crowd was the first of Hardy’s novels whose immediate popularity assured him that he could make a living from his pen. It finalized his break from his early career as an architect and launched him as a full-time writer. One early commentator on the novel in its serialized form went so far as to ascribe its authorship to England’s leading living novelist, George Eliot, an association that Hardy would later pointedly discount, even though Adam Bede clearly had a strong influence on several aspects of Far from the Madding Crowd. (Hetty Sorrel and Arthur Donnithorne were, for example, likely prototypes for Fanny Robin and Francis Troy.) The early reviews of Hardy’s novel were nevertheless surprisingly mixed. Although most reviewers found reason to praise the author’s obvious gifts of narration, characterization, and description, none of them fully recognized Hardy’s true achievement in the novel, and the death of Hardy’s friend Moule had eliminated one of his key early supporters in the reviewing world. Particularly troublesome to metropolitan reviewers were the scenes involving the farm laborers or “work-folk,” whose earthy but sententious dialogue was thought to be beyond the capability of the average English agricultural worker. In America the young Henry James, the author of a very different kind of fiction (the novel of manners), was particularly condescending, finding the novel long-winded and dull, the most appealing characters allegedly being the dogs and sheep. Despite mixed reviews the novel sold well, however, and by the end of Hardy’s formal career as a novelist in the mid-1890s, Far from the Madding Crowd was still one of the author’s most popular works of fiction and the first of his novels to have undergone stage adaptation, in 1882.

With the consolidation of Hardy’s critical reputation after the turn of the century, Far from the Madding Crowd assumed its rightful place in the line of Hardy’s major fiction, a position it has maintained throughout the twentieth century. As a testament to its enduring popular appeal, the novel was, in 1967, the first of Hardy’s works to appear as a major modern motion picture (a lost silent-movie version of the novel had actually been made in 1916). Directed by John Schlesinger, the modern film starred Julie Christie, Alan Bates, Peter Finch, and Terence Stamp. In addition, a television version of the story was released in 1998. That the novel has long remained popular with both academic and nonacademic readers attests to its masterful storytelling, memorable characterizations, and depth of insight into the splendors and miseries of Eros, and the nurturing yet ultimately amoral forces of nature.

Jonathan A. Cook has a B.A. from Harvard College and a Ph.D. from Columbia University. He has taught literature and writing at several colleges and universities in the New York, Boston, and Washington, D.C., areas. He is the author of Satirical Apocalypse: An Anatomy of Melville’s “The Confidence Man” (Greenwood Press, 1996) and has published numerous articles on the works of Herman Melville, Nathaniel Hawthorne, and other nineteenth-century writers. A member of the Thomas Hardy Association, he has adapted Hardy’s A Pair of Blue Eyes as a screenplay. He currently lives and teaches in northern Virginia.

Map of Wessex, prepared by Hardy in 1895. Refer to Index of Places p. 421 for red locations.


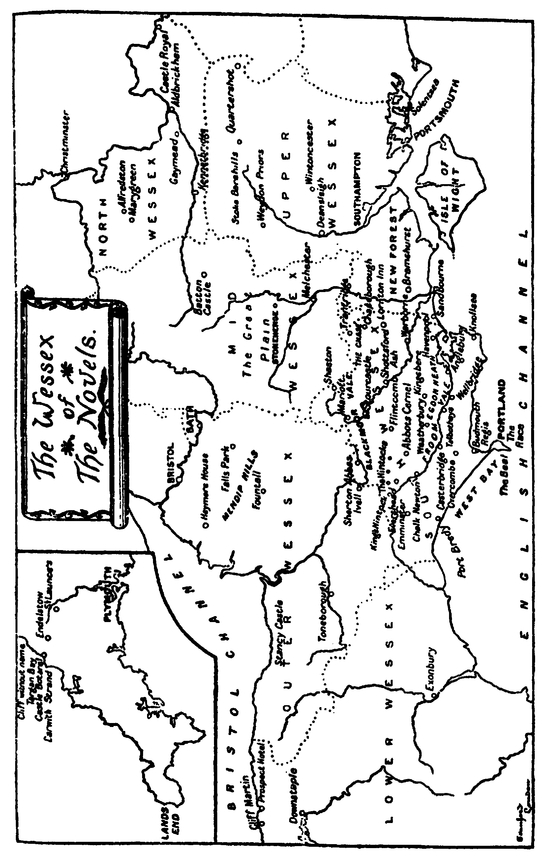


Far From the Madding Crowd

AUTHOR’S PREFACE

IN REPRINTING THIS STORY for a new edition I am reminded that it was in the chapters of “Far from the Madding Crowd,”[a](#a_1) as they appeared month by month in a popular magazine,† that I first ventured to adopt the word “Wessex” from the pages of early English history, and give it a fictitious significance as the existing name of the district once included in that extinct kingdom. The series of novels I projected being mainly of the kind called local, they seemed to require a territorial definition of some sort to lend unity to their scene. Finding that the area of a single county did not afford a canvas large enough for this purpose, and that there were objections to an invented name, I disinterred the old one. The region designated was known but vaguely, and I was often asked even by educated people where it lay. However, the press and the public were kind enough to welcome the fanciful plan, and willingly joined me in the anachronism of imagining a Wessex population living under Queen Victoria;—a modern Wessex of railways, the penny post, mowing and reaping machines, union workhouses, lucifer matches, labourers who could read and write, and National school children.‡ But I believe I am correct in stating that, until the existence of this contemporaneous Wessex in place of the usual counties was announced in the present story, in 1874, it had never been heard of in fiction and current speech, if at all, and that the expression, “a Wessex peasant,” or “a Wessex custom,” would theretofore have been taken to refer to nothing later in date than the Norman Conquest.§

I did not anticipate that this application of the word to modern story would extend outside the chapters of these particular chronicles. But it was soon taken up elsewhere, the first to adopt it being the now defunct Examiner, which, in the impression bearing date July 15, 1876, entitled one of its articles “The Wessex Labourer,” the article turning out to be no dissertation on farming during the Heptarchy,[b](#b_1) but on the modern peasant of the south-west counties.

Since then the appellation which I had thought to reserve to the horizons and landscapes of a partly real, partly dream-country, has become more and more popular as a practical provincial definition; and the dream-country has, by degrees, solidified into a utilitarian region which people can go to, take a house in, and write to the papers from. But I ask all good and idealistic readers to forget this, and to refuse steadfastly to believe that there are any inhabitants of a Victorian Wessex outside these volumes in which their lives and conversations are detailed.

Moreover, the village called Weatherbury, wherein the scenes of the present story of the series are for the most part laid, would perhaps be hardly discernible by the explorer, without help, in any existing place nowadays; though at the time, comparatively recent, at which the tale was written, a sufficient reality to meet the descriptions, both of backgrounds and personages, might have been traced easily enough. The church remains, by great good fortune, unrestored and intact,† and a few of the old houses; but the ancient malthouse, which was formerly so characteristic of the parish, has been pulled down these twenty years; also most of the thatched and dormered cottages that were once lifeholds. The heroine’s fine old Jacobean house would be found in the story to have taken a witch’s ride of a mile or more from its actual position; though with that difference its features are described as they still show themselves to the sun and moonlight. The game of prisoner’s-base, which not so long ago seemed to enjoy a perennial vitality in front of the worn-out stocks, may, so far as I can say, be entirely unknown to the rising generation of schoolboys there. The practice of divination by Bible and key, the regarding of valentines as things of serious import, the shearing-supper, the long smock-frocks, and the harvest-home, have, too, nearly disappeared in the wake of the old houses; and with them has gone, it is said, much of that love of fuddling[c](#c_1) to which the village at one time was notoriously prone. The change at the root of this has been the recent supplanting of the class of stationary cottagers, who carried on the local traditions and humours, by a population of more or less migratory labourers, which has led to a break of continuity in local history, more fatal than any other thing to the preservation of legend, folklore, close inter-social relations, and eccentric individualities. For these the indispensable conditions of existence are attachment to the soil of one particular spot by generation after generation.

T. H.

1895-1902

CHAPTER I

Description of Farmer Oak—An Incident

WHEN FARMER OAK SMILED, the corners of his mouth spread till they were within an unimportant distance of his ears, his eyes were reduced to chinks, and diverging wrinkles appeared round them, extending upon his countenance like the rays in a rudimentary sketch of the rising sun.

His Christian name was Gabriel,[1](#1_1) and on working days he was a young man of sound judgment, easy motions, proper dress, and general good character. On Sundays he was a man of misty views, rather given to postponing, and hampered by his best clothes and umbrella: upon the whole, one who felt himself to occupy morally that vast middle space of Laodicean neutrality[d](#d_1) which lay between the Communion people of the parish and the drunken section,—that is, he went to church, but yawned privately by the time the congregation reached the Nicene creed,† and thought of what there would be for dinner when he meant to be listening to the sermon. Or, to state his character as it stood in the scale of public opinion, when his friends and critics were in tantrums, he was considered rather a bad man; when they were pleased, he was rather a good man; when they were neither, he was a man whose moral colour was a kind of pepper-and-salt mixture.

Since he lived six times as many working-days as Sundays, Oak’s appearance in his old clothes was most peculiarly his own—the mental picture formed by his neighbours in imagining him being always dressed in that way. He wore a low-crowned felt hat, spread out at the base by tight jamming upon the head for security in high winds, and a coat like Dr. Johnson’s,‡ his lower extremities being encased in ordinary leather leggings and boots emphatically large, affording to each foot a roomy apartment so constructed that any wearer might stand in a river all day long and know nothing of damp—their maker being a conscientious man who endeavoured to compensate for any weakness in his cut by unstinted dimension and solidity.

Mr. Oak carried about him, by way of watch, what may be called a small silver clock; in other words, it was a watch as to shape and intention, and a small clock as to size. This instrument being several years older than Oak’s grandfather, had the peculiarity of going either too fast or not at all. The smaller of its hands, too, occasionally slipped round on the pivot, and thus, though the minutes were told with precision, nobody could be quite certain of the hour they belonged to. The stopping peculiarity of his watch Oak remedied by thumps and shakes, and he escaped any evil consequences from the other two defects by constant comparisons with and observations of the sun and stars, and by pressing his face close to the glass of his neighbours’ windows, till he could discern the hour marked by the green-faced timekeepers within. It may be mentioned that Oak’s fob[e](#e_1) being difficult of access, by reason of its somewhat high situation in the waistband of his trousers (which also lay at a remote height under his waistcoat), the watch was as a necessity pulled out by throwing the body to one side, compressing the mouth and face to a mere mass of ruddy flesh on account of the exertion, and drawing up the watch by its chain, like a bucket from a well.

But some thoughtful persons, who had seen him walking across one of his fields on a certain December morning—sunny and exceedingly mild—might have regarded Gabriel Oak in other aspects than these. In his face one might notice that many of the hues and curves of youth had tarried on to manhood: there even remained in his remoter crannies some relics of the boy. His height and breadth would have been sufficient to make his presence imposing, had they been exhibited with due consideration. But there is a way some men have, rural and urban alike, for which the mind is more responsible than flesh and sinew: it is a way of curtailing their dimensions by their manner of showing them. And from a quiet modesty that would have become a vestal, which seemed continually to impress upon him that he had no great claim on the world’s room, Oak walked unassumingly, and with a faintly perceptible bend, yet distinct from a bowing of the shoulders. This may be said to be a defect in an individual if he depends for his valuation more upon his appearance than upon his capacity to wear well, which Oak did not.

He had just reached the time of life at which “young” is ceasing to be the prefix of “man” in speaking of one. He was at the brightest period of masculine growth, for his intellect and his emotions were clearly separated: he had passed the time during which the influence of youth indiscriminately mingles them in the character of impulse, and he had not yet arrived at the stage wherein they become united again, in the character of prejudice, by the influence of a wife and family. In short, he was twenty-eight, and a bachelor.

The field he was in this morning sloped to a ridge called Norcombe Hill. Through a spur of this hill ran the highway between Emminster and Chalk-Newton. Casually glancing over the hedge, Oak saw coming down the incline before him an ornamental spring waggon, [f](#f_1) painted yellow and gaily marked, drawn by two horses, a waggoner walking alongside bearing a whip perpendicularly. The waggon was laden with household goods and window plants, and on the apex of the whole sat a woman, young and attractive. Gabriel had not beheld the sight for more than half a minute, when the vehicle was brought to a standstill just beneath his eyes.

“The tailboard of the waggon is gone, Miss,” said the waggoner.

“Then I heard it fall,” said the girl, in a soft, though not particularly low voice. “I heard a noise I could not account for when we were coming up the hill.”

“I’ll run back.”

“Do,” she answered.

The sensible horses stood perfectly still, and the waggoner’s steps sank fainter and fainter in the distance.

The girl on the summit of the load sat motionless, surrounded by tables and chairs with their legs upwards, backed by an oak settle, and ornamented in front by pots of geraniums, myrtles, and cactuses, together with a caged canary—all probably from the windows of the house just vacated. There was also a cat in a willow basket, from the partly-opened lid of which she gazed with half-closed eyes, and affectionately surveyed the small birds around.

The handsome girl waited for some time idly in her place, and the only sound heard in the stillness was the hopping of the canary up and down the perches of its prison. Then she looked attentively downwards. It was not at the bird, nor at the cat; it was at an oblong package tied in paper, and lying between them. She turned her head to learn if the waggoner were coming. He was not yet in sight; and her eyes crept back to the package, her thoughts seeming to run upon what was inside it. At length she drew the article into her lap, and untied the paper covering; a small swing looking-glass was disclosed, in which she proceeded to survey herself attentively. She parted her lips and smiled.

It was a fine morning, and the sun lighted up to a scarlet glow the crimson jacket she wore, and painted a soft lustre upon her bright face and dark hair. The myrtles, geraniums, and cactuses packed around her were fresh and green, and at such a leafless season they invested the whole concern of horses, waggon, furniture, and girl with a peculiar vernal charm. What possessed her to indulge in such a performance in the sight of the sparrows, blackbirds, and unperceived farmer who were alone its spectators,—whether the smile began as a factitious one, to test her capacity in that art,—nobody knows; it ended certainly in a real smile. She blushed at herself, and seeing her reflection blush, blushed the more.

The change from the customary spot and necessary occasion of such an act—from the dressing hour in a bedroom to a time of travelling out of doors—lent to the idle deed a novelty it did not intrinsically possess. The picture was a delicate one. Woman’s prescriptive infirmity had stalked into the sunlight, which had clothed it in the freshness of an originality. A cynical inference was irresistible by Gabriel Oak as he regarded the scene, generous though he fain would have been. There was no necessity whatever for her looking in the glass. She did not adjust her hat, or pat her hair, or press a dimple into shape, or do one thing to signify that any such intention had been her motive in taking up the glass. She simply observed herself as a fair product of Nature in the feminine kind, her thoughts seeming to glide into far-off though likely dramas in which men would play a part—vistas of probable triumphs—the smiles being of a phase suggesting that hearts were imagined as lost and won. Still, this was but conjecture, and the whole series of actions was so idly put forth as to make it rash to assert that intention had any part in them at all.

The waggoner’s steps were heard returning. She put the glass in the paper, and the whole again into its place.

When the waggon had passed on, Gabriel withdrew from his point of espial, and descending into the road, followed the vehicle to the turnpike-gate some way beyond the bottom of the hill, where the object of his contemplation now halted for the payment of toll. About twenty steps still remained between him and the gate, when he heard a dispute. It was a difference concerning twopence between the persons with the waggon and the man at the toll-bar.

“Mis’ess’s niece is upon the top of the things, and she says that’s enough that I’ve offered ye, you great miser, and she won’t pay any more.” These were the waggoner’s words.

“Very well; then mis’ess’s niece can’t pass,” said the turnpike-keeper, closing the gate.

Oak looked from one to the other of the disputants, and fell into a reverie. There was something in the tone of twopence remarkably insignificant. Threepence had a definite value as money—it was an appreciable infringement on a day’s wages, and, as such, a higgling matter; but twopence—“Here,” he said, stepping forward and handing twopence to the gatekeeper; “let the young woman pass.” He looked up at her then; she heard his words, and looked down.

Gabriel’s features adhered throughout their form so exactly to the middle line between the beauty of St. John and the ugliness of Judas Iscariot, as represented in a window of the church he attended, that not a single lineament could be selected and called worthy either of distinction or notoriety. The red-jacketed and dark-haired maiden seemed to think so too, for she carelessly glanced over him, and told her man to drive on. She might have looked her thanks to Gabriel on a minute scale, but she did not speak them; more probably she felt none, for in gaining her a passage he had lost her her point, and we know how women take a favour of that kind.

The gatekeeper surveyed the retreating vehicle. “That’s a handsome maid,” he said to Oak.

“But she has her faults,” said Gabriel.

“True, farmer.”

“And the greatest of them is—well, what it is always.”

“Beating people down? ay, ’tis so.”

“O no.”

“What, then?”

Gabriel, perhaps a little piqued by the comely traveller’s indifference, glanced back to where he had witnessed her performance over the hedge, and said, “Vanity.”

CHAPTER II

Night—The Flock—An Interior—Another Interior

IT WAS NEARLY MIDNIGHT on the eve of St. Thomas’s, the shortest day in the year. A desolating wind wandered from the north over the hill whereon Oak had watched the yellow waggon and its occupant in the sunshine of a few days earlier.

Norcombe Hill-not far from lonely Toller-Down-was one of the spots which suggest to a passer-by that he is in the presence of a shape approaching the indestructible as nearly as any to be found on earth. It was a featureless convexity of chalk and soil—an ordinary specimen of those smoothly-outlined protuberances of the globe which may remain undisturbed on some great day of confusion, when far grander heights and dizzy granite precipices topple down.

The hill was covered on its northern side by an ancient and decaying plantation of beeches, whose upper verge formed a line over the crest, fringing its arched curve against the sky, like a mane. Tonight these trees sheltered the southern slope from the keenest blasts, which smote the wood and floundered through it with a sound as of grumbling, or gushed over its crowning boughs in a weakened moan. The dry leaves in the ditch simmered and boiled in the same breezes, a tongue of air occasionally ferreting out a few, and sending them spinning across the grass. A group or two of the latest in date amongst the dead multitude had remained till this very mid-winter time on the twigs which bore them, and in falling rattled against the trunks with smart taps.

Between this half-wooded half-naked hill, and the vague still horizon that its summit indistinctly commanded, was a mysterious sheet of fathomless shade—the sounds from which suggested that what it concealed bore some reduced resemblance to features here. The thin grasses, more or less coating the hill, were touched by the wind in breezes of differing powers, and almost of differing natures—one rubbing the blades heavily, another raking them piercingly, another brushing them like a soft broom. The instinctive act of humankind was to stand and listen, and learn how the trees on the right and the trees on the left wailed or chaunted to each other in the regular antiphonies of a cathedral choir; how hedges and other shapes to leeward then caught the note, lowering it to the tenderest sob; and how the hurrying gust then plunged into the south, to be heard no more.

The sky was clear—remarkably clear—and the twinkling of all the stars seemed to be but throbs of one body, timed by a common pulse. The North Star was directly in the wind’s eye, and since evening the Bear[g](#g_1) had swung round it outwardly to the east, till he was now at a right angle with the meridian. A difference of colour in the stars—oftener read of than seen in England—was really perceptible here. The sovereign brilliancy of Sirius† pierced the eye with a steely glitter, the star called Capella was yellow, Aldebaran and Betelgueux‡ shone with a fiery red.

To persons standing alone on a hill during a clear midnight such as this, the roll of the world eastward is almost a palpable movement. The sensation may be caused by the panoramic glide of the stars past earthly objects, which is perceptible in a few minutes of stillness, or by the better outlook upon space that a hill affords, or by the wind, or by the solitude; but whatever be its origin the impression of riding along is vivid and abiding. The poetry of motion is a phrase much in use, and to enjoy the epic form of that gratification it is necessary to stand on a hill at a small hour of the night, and, having first expanded with a sense of difference from the mass of civilized mankind, who are dreamwrapt and disregardful of all such proceedings at this time, long and quietly watch your stately progress through the stars. After such a nocturnal reconnoitre it is hard to get back to earth, and to believe that the consciousness of such majestic speeding is derived from a tiny human frame.

Suddenly an unexpected series of sounds began to be heard in this place up against the sky. They had a clearness which was to be found nowhere in the wind, and a sequence which was to be found nowhere in nature. They were the notes of Farmer Oak’s flute.

The tune was not floating unhindered into the open air: it seemed muffled in some way, and was altogether too curtailed in power to spread high or wide. It came from the direction of a small dark object under the plantation hedge—a shepherd’s hut—now presenting an outline to which an uninitiated person might have been puzzled to attach either meaning or use.

The image as a whole was that of a small Noah’s Ark on a small Ararat,[h](#h_1) allowing the traditionary outlines and general form of the Ark which are followed by toy-makers—and by these means are established in men’s imaginations among their firmest, because earliest impressions—to pass as an approximate pattern. The hut stood on little wheels, which raised its floor about a foot from the ground. Such shepherds’ huts are dragged into the fields when the lambing season comes on, to shelter the shepherd in his enforced nightly attendance.

It was only latterly that people had begun to call Gabriel “Farmer” Oak. During the twelvemonth preceding this time he had been enabled by sustained efforts of industry and chronic good spirits to lease the small sheep-farm of which Norcombe Hill was a portion, and stock it with two hundred sheep. Previously he had been a bailiff for a short time, and earlier still a shepherd only, having from his childhood assisted his father in tending the flocks of large proprietors, till old Gabriel sank to rest.

This venture, unaided and alone, into the paths of farming as master and not as man, with an advance of sheep not yet paid for, was a critical juncture with Gabriel Oak, and he recognized his position clearly. The first movement in his new progress was the lambing of his ewes, and sheep having been his speciality from his youth, he wisely refrained from deputing the task of tending them at this season to a hireling or a novice.

The wind continued to beat about the corners of the hut, but the flute-playing ceased. A rectangular space of light appeared in the side of the hut, and in the opening the outline of Farmer Oak’s figure. He carried a lantern in his hand, and closing the door behind him came forward and busied himself about this nook of the field for nearly twenty minutes, the lantern light appearing and disappearing here and there, and brightening him or darkening him as he stood before or behind it.

Oak’s motions, though they had a quiet energy, were slow, and their deliberateness accorded well with his occupation. Fitness being the basis of beauty, nobody could have denied that his steady swings and turns in and about the flock had elements of grace. Yet, although if occasion demanded he could do or think a thing with as mercurial a dash as can the men of towns who are more to the manner born, his special power, morally, physically, and mentally, was static, owing little or nothing to momentum as a rule.

A close examination of the ground hereabout, even by the wan starlight only, revealed how a portion of what would have been casually called a wild slope had been appropriated by Farmer Oak for his great purpose this winter. Detached hurdles thatched with straw were stuck into the ground at various scattered points, amid and under which the whitish forms of his meek ewes moved and rustled. The ring of the sheep-bell, which had been silent during his absence, recommenced, in tones that had more mellowness than clearness, owing to an increasing growth of surrounding wool. This continued till Oak withdrew again from the flock. He returned to the hut, bringing in his arms a new-born lamb, consisting of four legs large enough for a full-grown sheep, united by a seemingly inconsiderable membrane about half the substance of the legs collectively, which constituted the animal’s entire body just at present.

The little speck of life he placed on a wisp of hay before the small stove, where a can of milk was simmering. Oak extinguished the lantern by blowing into it and then pinching the snuff, the cot being lighted by a candle suspended by a twisted wire. A rather hard couch, formed of a few corn sacks thrown carelessly down, covered half the floor of this little habitation, and here the young man stretched himself along, loosened his woollen cravat, and closed his eyes. In about the time a person unaccustomed to bodily labour would have decided upon which side to lie, Farmer Oak was asleep.

The inside of the hut, as it now presented itself, was cosy and alluring, and the scarlet handful of fire in addition to the candle, reflecting its own genial colour upon whatever it could reach, flung associations of enjoyment even over utensils and tools. In the corner stood the sheep-crook, and along a shelf at one side were ranged bottles and canisters of the simple preparations pertaining to ovine surgery and physic; spirits of wine, turpentine, tar, magnesia, ginger, and castor-oil being the chief. On a triangular shelf across the corner stood bread, bacon, cheese, and a cup for ale or cider, which was supplied from a flagon beneath. Beside the provisions lay the flute, whose notes had lately been called forth by the lonely watcher to beguile a tedious hour. The house was ventilated by two round holes, like the lights of a ship’s cabin, with wood slides.

The lamb, revived by the warmth, began to bleat, and the sound entered Gabriel’s ears and brain with an instant meaning, as expected sounds will. Passing from the profoundest sleep to the most alert wakefulness with the same ease that had accompanied the reverse operation, he looked at his watch, found that the hour-hand had shifted again, put on his hat, took the lamb in his arms, and carried it into the darkness. After placing the little creature with its mother he stood and carefully examined the sky, to ascertain the time of night from the altitudes of the stars.

The Dog-star and Aldebaran, pointing to the restless Pleiades, were half-way up the Southern sky, and between them hung Orion, which gorgeous constellation never burnt more vividly than now, as it soared forth above the rim of the landscape. Castor and Pollux with their quiet shine were almost on the meridian: the barren and gloomy Square of Pegasus was creeping round to the north-west; far away through the plantation Vega sparkled like a lamp suspended amid the leafless trees, and Cassiopeia’s chair stood daintily poised on the uppermost boughs:[2](#2_1) “One o’clock,” said Gabriel.

Being a man not without a frequent consciousness that there was some charm in this life he led, he stood still after looking at the sky as a useful instrument, and regarded it in an appreciative spirit, as a work of art superlatively beautiful. For a moment he seemed impressed with the speaking loneliness of the scene, or rather with the complete abstraction from all its compass of the sights and sounds of man. Human shapes, interferences, troubles, and joys were all as if they were not, and there seemed to be on the shaded hemisphere of the globe no sentient being save himself; he could fancy them all gone round to the sunny side.

Occupied thus, with eyes stretched afar, Oak gradually perceived that what he had previously taken to be a star low down behind the outskirts of the plantation was in reality no such thing. It was an artificial light, almost close at hand.

To find themselves utterly alone at night where company is desirable and expected makes some people fearful; but a case more trying by far to the nerves is to discover some mysterious companionship when intuition, sensation, memory, analogy, testimony, probability, induction—every kind of evidence in the logician’s list—have united to persuade consciousness that it is quite in isolation.

Farmer Oak went towards the plantation and pushed through its lower boughs to the windy side. A dim mass under the slope reminded him that a shed occupied a place here, the site being a cutting into the slope of the hill, so that at its back part the roof was almost level with the ground. In front it was formed of boards nailed to posts and covered with tar as a preservative. Through crevices in the roof and side spread streaks and dots of light, a combination of which made the radiance that had attracted him. Oak stepped up behind, where, leaning down upon the roof and putting his eye close to a hole, he could see into the interior clearly.

The place contained two women and two cows. By the side of the latter a steaming bran-mash stood in a bucket. One of the women was past middle age. Her companion was apparently young and graceful; he could form no decided opinion upon her looks, her position being almost beneath his eye, so that he saw her in a bird’s-eye view, as Milton’s Satan first saw Paradise.[i](#i_1) She wore no bonnet or hat, but had enveloped herself in a large cloak, which was carelessly flung over her head as a covering.

“There, now we’ll go home,” said the elder of the two, resting her knuckles upon her hips, and looking at their goings-on as a whole. “I do hope Daisy will fetch round again now. I have never been more frightened in my life, but I don’t mind breaking my rest if she recovers.”

The young woman, whose eyelids were apparently inclined to fall together on the smallest provocation of silence, yawned without parting her lips to any inconvenient extent, whereupon Gabriel caught the infection and slightly yawned in sympathy.

“I wish we were rich enough to pay a man to do these things,” she said.

“As we are not, we must do them ourselves,” said the other; “for you must help me if you stay.”

“Well, my hat is gone, however,” continued the younger. “It went over the hedge, I think. The idea of such a slight wind catching it.”

The cow standing erect was of the Devon breed, and was encased in a tight warm hide of rich Indian red, as absolutely uniform from eyes to tail as if the animal had been dipped in a dye of that colour, her long back being mathematically level. The other was spotted, gray and white. Beside her Oak now noticed a little calf about a day old, looking idiotically at the two women, which showed that it had not long been accustomed to the phenomenon of eyesight, and often turning to the lantern, which it apparently mistook for the moon, inherited instinct having as yet had little time for correction by experience. Between the sheep and the cows Lucina[j](#j_1) had been busy on Norcombe Hill lately.

“I think we had better send for some oatmeal,” said the elder woman; “there’s no more bran.”

“Yes, aunt; and I’ll ride over for it as soon as it is light.”

“But there’s no side-saddle.”†

“I can ride on the other: trust me.”

Oak, upon hearing these remarks, became more curious to observe her features, but this prospect being denied him by the hooding effect of the cloak, and by his aerial position, he felt himself drawing upon his fancy for their details. In making even horizontal and clear inspections we colour and mould according to the wants within us whatever our eyes bring in. Had Gabriel been able from the first to get a distinct view of her countenance, his estimate of it as very handsome or slightly so would have been as his soul required a divinity at the moment or was ready supplied with one. Having for some time known the want of a satisfactory form to fill an increasing void within him, his position moreover affording the widest scope for his fancy, he painted her a beauty.

By one of those whimsical coincidences in which Nature, like a busy mother, seems to spare a moment from her unremitting labours to turn and make her children smile, the girl now dropped the cloak, and forth tumbled ropes of black hair over a red jacket. Oak knew her instantly as the heroine of the yellow waggon, myrtles, and looking-glass: prosily, as the woman who owed him two-pence.

They placed the calf beside its mother again, took up the lantern, and went out, the light sinking down the hill till it was no more than a nebula. Gabriel Oak returned to his flock.

CHAPTER III

A Girl on Horseback—Conversation

THE SLUGGISH DAY BEGAN to break. Even its position terrestrially is one of the elements of a new interest, and for no particular reason save that the incident of the night had occurred there Oak went again into the plantation. Lingering and musing here he heard the steps of a horse at the foot of the hill, and soon there appeared in view an auburn pony with a girl on its back, ascending by the path leading past the cattle-shed. She was the young woman of the night before. Gabriel instantly thought of the hat she had mentioned as having lost in the wind; possibly she had come to look for it. He hastily scanned the ditch, and after walking about ten yards along it found the hat among the leaves. Gabriel took it in his hand and returned to his hut. Here he ensconced himself, and peeped through the loophole in the direction of the rider’s approach.

She came up and looked around—then on the other side of the hedge. Gabriel was about to advance and restore the missing article, when an unexpected performance induced him to suspend the action for the present. The path, after passing the cowshed, bisected the plantation. It was not a bridle-path-merely a pedestrian’s track, and the boughs spread horizontally at a height not greater than seven feet above the ground, which made it impossible to ride erect beneath them. The girl, who wore no riding-habit, looked around for a moment, as if to assure herself that all humanity was out of view, then dexterously dropped backwards flat upon the pony’s back, her head over its tail, her feet against its shoulders, and her eyes to the sky. The rapidity of her glide into this position was that of a kingnsher—its noiselessness that of a hawk. Gabriel’s eyes had scarcely been able to follow her. The tall lank pony seemed used to such doings, and ambled along unconcerned. Thus she passed under the level boughs.

The performer seemed quite at home anywhere between a horse’s head and its tail, and the necessity for this abnormal attitude having ceased with the passage of the plantation, she began to adopt another, even more obviously convenient than the first. She had no side-saddle, and it was very apparent that a firm seat upon the smooth leather beneath her was unattainable sideways. Springing to her accustomed perpendicular like a bowed sapling, and satisfying herself that nobody was in sight, she seated herself in the manner demanded by the saddle, though hardly expected of the woman, and trotted off in the direction of Tewnell Mill.

Oak was amused, perhaps a little astonished, and hanging up the hat in his hut went again among his ewes. An hour passed, the girl returned, properly seated now, with a bag of bran in front of her. On nearing the cattle-shed she was met by a boy bringing a milking-pail, who held the reins of the pony whilst she slid off. The boy led away the horse, leaving the pail with the young woman.

Soon soft spirts alternating with loud spirts came in regular succession from within the shed, the obvious sounds of a person milking a cow. Gabriel took the lost hat in his hand, and waited beside the path she would follow in leaving the hill.

She came, the pail in one hand, hanging against her knee. The left arm was extended as a balance, enough of it being shown bare to make Oak wish that the event had happened in the summer, when the whole would have been revealed. There was a bright air and manner about her now, by which she seemed to imply that the desirability of her existence could not be questioned; and this rather saucy assumption failed in being offensive because a beholder felt it to be, upon the whole, true. Like exceptional emphasis in the tone of a genius, that which would have made mediocrity ridiculous was an addition to recognized power. It was with some surprise that she saw Gabriel’s face rising like the moon behind the hedge.

The adjustment of the farmer’s hazy conceptions of her charms to the portrait of herself she now presented him with was less a diminution than a difference. The starting-point selected by the judgment was her height. She seemed tall, but the pail was a small one, and the hedge diminutive; hence, making allowance for error by comparison with these, she could have been not above the height to be chosen by women as best. All features of consequence were severe and regular. It may have been observed by persons who go about the shires with eyes for beauty that in Englishwomen a classically-formed face is seldom found to be united with a figure of the same pattern, the highly-finished features being generally too large for the remainder of the frame; that a graceful and proportionate figure of eight heads[k](#k_1) usually goes off into random facial curves. Without throwing a Nymphean tissue over a milkmaid, let it be said that here criticism checked itself as out of place, and looked at her proportions with a long consciousness of pleasure. From the contours of her figure in its upper part she must have had a beautiful neck and shoulders; but since her infancy nobody had ever seen them. Had she been put into a low dress she would have run and thrust her head into a bush. Yet she was not a shy girl by any means; it was merely her instinct to draw the line dividing the seen from the unseen higher than they do it in towns.

That the girl’s thoughts hovered about her face and form as soon as she caught Oak’s eyes conning the same page was natural, and almost certain. The self-consciousness shown would have been vanity if a little more pronounced, dignity if a little less. Rays of male vision seem to have a tickling effect upon virgin faces in rural districts; she brushed hers with her hand, as if Gabriel had been irritating its pink surface by actual touch, and the free air of her previous movements was reduced at the same time to a chastened phase of itself. Yet it was the man who blushed, the maid not at all.

“I found a hat,” said Oak.

“It is mine,” said she, and, from a sense of proportion, kept down to a small smile an inclination to laugh distinctly: “it flew away last night.”

“One o’clock this morning?”

“Well—it was.” She was surprised. “How did you know?” she said.

“I was here.”

“You are Farmer Oak, are you not?”

“That or thereabouts. I’m lately come to this place.”

“A large farm?” she inquired, casting her eyes round, and swinging back her hair, which was black in the shaded hollows of its mass; but it being now an hour past sunrise the rays touched its prominent curves with a colour of their own.

“No; not large. About a hundred.” (In speaking of farms the word “acres” is omitted by the natives, by analogy to such old expressions as “a stag of ten.”)

“I wanted my hat this morning,” she went on. “I had to ride to Tewnell Mill.”

“Yes, you had.”

“How do you know?”

“I saw you.”

“Where?” she inquired, a misgiving bringing every muscle of her lineaments and frame to a standstill.

“Here—going through the plantation, and all down the hill,” said Farmer Oak, with an aspect excessively knowing with regard to some matter in his mind, as he gazed at a remote point in the direction named, and then turned back to meet his colloquist’s eyes.

A perception caused him to withdraw his own eyes from hers as suddenly as if he had been caught in a theft. Recollection of the strange antics she had indulged in when passing through the trees was succeeded in the girl by a nettled palpitation, and that by a hot face. It was a time to see a woman redden who was not given to reddening as a rule; not a point in the milkmaid but was of the deepest rose-colour. From the Maiden’s Blush, through all varieties of the Provence down to the Crimson Tuscany[l](#l_1) the countenance of Oak’s acquaintance quickly graduated; whereupon he, in considerateness, turned away his head.

The sympathetic man still looked the other way, and wondered when she would recover coolness sufficient to justify him in facing her again. He heard what seemed to be the flitting of a dead leaf upon the breeze, and looked. She had gone away.

With an air between that of Tragedy and Comedy Gabriel returned to his work.

Five mornings and evenings passed. The young woman came regularly to milk the healthy cow or to attend to the sick one, but never allowed her vision to stray in the direction of Oak’s person. His want of tact had deeply offended her—not by seeing what he could not help, but by letting her know that he had seen it. For, as without law there is no sin, without eyes there is no indecorum; and she appeared to feel that Gabriel’s espial had made her an indecorous woman without her own connivance. It was food for great regret with him; it was also a contretemps which touched into life a latent heat he had experienced in that direction.

The acquaintanceship might, however, have ended in a slow forgetting but for an incident which occurred at the end of the same week. One afternoon it began to freeze, and the frost increased with evening, which drew on like a stealthy tightening of bonds. It was a time when in cottages the breath of the sleepers freezes to the sheets; when round the drawing-room fire of a thick-walled mansion the sitters’ backs are cold, even whilst their faces are all aglow. Many a small bird went to bed supperless that night among the bare boughs.

As the milking-hour drew near Oak kept his usual watch upon the cowshed. At last he felt cold, and shaking an extra quantity of bedding round the yeaning ewes[m](#m_1) he entered the hut and heaped more fuel upon the stove. The wind came in at the bottom of the door, and to prevent it Oak laid a sack there and wheeled the cot round a little more to the south. Then the wind spouted in at a ventilating hole—of which there was one on each side of the hut.

Gabriel had always known that when the fire was lighted and the door closed one of these must be kept open—that chosen being always on the side away from the wind. Closing the slide to windward he turned to open the other; on second thoughts the farmer considered that he would first sit down, leaving both closed for a minute or two, till the temperature of the hut was a little raised. He sat down.

His head began to ache in an unwonted manner and, fancying himself weary by reason of the broken rests of the preceding nights, Oak decided to get up, open the slide, and then allow himself to fall asleep. He fell asleep, however, without having performed the necessary preliminary.

How long he remained unconscious Gabriel never knew. During the first stages of his return to perception peculiar deeds seemed to be in course of enactment. His dog was howling, his head was aching fearfully—somebody was pulling him about, hands were loosening his neckerchief.

On opening his eyes he found that evening had sunk to dusk in a strange manner of unexpectedness. The young girl with the remarkably pleasant lips and white teeth was beside him. More than this—astonishingly more—his head was upon her lap, his face and neck were disagreeably wet, and her fingers were unbuttoning his collar.

“Whatever is the matter?” said Oak vacantly.

She seemed to experience mirth, but of too insignificant a kind to start enjoyment.

“Nothing now,” she answered, “since you are not dead. It is a wonder you were not suffocated in this hut of yours.”

“Ah, the hut!” murmured Gabriel. “I gave ten pounds for that hut. But I’ll sell it, and sit under thatched hurdles as they did in old times, and curl up to sleep in a lock of straw! It played me nearly the same trick the other day!” Gabriel, by way of emphasis, brought down his fist upon the floor.

“It was not exactly the fault of the hut,” she observed in a tone which showed her to be that novelty among women—one who finished a thought before beginning the sentence which was to convey it. “You should, I think, have considered, and not have been so foolish as to leave the slides closed.”

“Yes, I suppose I should,” said Oak absently. He was endeavouring to catch and appreciate the sensation of being thus with her, his head upon her dress, before the event passed on into the heap of bygone things. He wished she knew his impressions; but he would as soon have thought of carrying an odour in a net as of attempting to convey the intangibilities of his feeling in the coarse meshes of language. So he remained silent.

She made him sit up, and then Oak began wiping his face and shaking himself like a Samson.[n](#n_1) “How can I thank ’ee?” he said at last gratefully, some of the natural rusty red having returned to his face.

“Oh, never mind that,” said the girl, smiling, and allowing her smile to hold good for Gabriel’s next remark, whatever that might prove to be.

“How did you find me?”

“I heard your dog howling and scratching at the door of the hut when I came to the milking (it was so lucky, Daisy’s milking is almost over for the season, and I shall not come here after this week or the next). The dog saw me, and jumped over to me, and laid hold of my skirt. I came across and looked round the hut the very first thing to see if the slides were closed. My uncle has a hut like this one, and I have heard him tell his shepherd not to go to sleep without leaving a slide open. I opened the door, and there you were like dead. I threw the milk over you, as there was no water, forgetting it was warm, and no use.”

“I wonder if I should have died?” Gabriel said in a low voice, which was rather meant to travel back to himself than to her.

“O no!” the girl replied. She seemed to prefer a less tragic probability; to have saved a man from death involved talk that should harmonize with the dignity of such a deed—and she shunned it.

“I believe you saved my life, Miss—I don’t know your name. I know your aunt’s, but not yours.”

“I would just as soon not tell it—rather not. There is no reason either why I should, as you probably will never have much to do with me.”

“Still I should like to know.”

“You can inquire at my aunt’s—she will tell you.”

“My name is Gabriel Oak.”

“And mine isn’t. You seem fond of yours in speaking it so decisively, Gabriel Oak.”

“You see, it is the only one I shall ever have, and I must make the most of it.”

“I always think mine sounds odd and disagreeable.”

“I should think you might soon get a new one.”

“Mercy!—how many opinions you keep about you concerning other people, Gabriel Oak.”

“Well, Miss—excuse the words—I thought you would like them. But I can’t match you, I know, in mapping out my mind upon my tongue. I never was very clever in my inside. But I thank you. Come, give me your hand!”

She hesitated, somewhat disconcerted at Oak’s old-fashioned earnest conclusion to a dialogue lightly carried on. “Very well,” she said, and gave him her hand, compressing her lips to a demure impassivity. He held it but an instant, and in his fear of being too demonstrative, swerved to the opposite extreme, touching her fingers with the lightness of a small-hearted person.

“I am sorry,” he said the instant after.

“What for?”

“Letting your hand go so quick.”

“You may have it again if you like; there it is.” She gave him her hand again.

Oak held it longer this time—indeed, curiously long. “How soft it is—being winter time, too—not chapped or rough, or anything!” he said.

“There—that’s long enough,” said she, though without pulling it away. “But I suppose you are thinking you would like to kiss it? You may if you want to.”

“I wasn’t thinking of any such thing,” said Gabriel simply; “but I will—”

“That you won’t!” She snatched back her hand.

Gabriel felt himself guilty of another want of tact.

“Now find out my name,” she said teasingly; and withdrew.

CHAPTER IV

Gabriel’s Resolve—The Visit—The Mistake

THE ONLY SUPERIORITY IN women that is tolerable to the rival sex is, as a rule, that of the unconscious kind; but a superiority which recognizes itself may sometimes please by suggesting possibilities of capture to the subordinated man.

This well-favoured and comely girl soon made appreciable inroads upon the emotional constitution of young Farmer Oak.

Love being an extremely exacting usurer (a sense of exorbitant profit, spiritually, by an exchange of hearts, being at the bottom of pure passions, as that of exorbitant profit, bodily or materially, is at the bottom of those of lower atmosphere), every morning Oak’s feelings were as sensitive as the money-market in calculations upon his chances. His dog waited for his meals in a way so like that in which Oak waited for the girl’s presence that the farmer was quite struck with the resemblance, felt it lowering, and would not look at the dog. However, he continued to watch through the hedge for her regular coming, and thus his sentiments towards her were deepened without any corresponding effect being produced upon herself. Oak had nothing finished and ready to say as yet, and not being able to frame love phrases which end where they begin; passionate tales—

—Full of sound and fury

—Signifying nothin—[o](#o_1)

he said no word at all.

By making inquiries he found that the girl’s name was Bathsheba Everdene,[3](#3_1) and that the cow would go dry in about seven days. He dreaded the eighth day.

At last the eighth day came. The cow had ceased to give milk for that year, and Bathsheba Everdene came up the hill no more. Gabriel had reached a pitch of existence he never could have anticipated a short time before. He liked saying “Bathsheba” as a private enjoyment instead of whistling; turned over his taste to black hair, though he had sworn by brown ever since he was a boy, isolated himself till the space he filled in the public eye was contemptibly small. Love is a possible strength in an actual weakness. Marriage transforms a distraction into a support, the power of which should be, and happily often is, in direct proportion to the degree of imbecility it supplants. Oak began now to see light in this direction, and said to himself, “I’ll make her my wife, or upon my soul I shall be good for nothing!”

All this while he was perplexing himself about an errand on which he might consistently visit the cottage of Bathsheba’s aunt.

He found his opportunity in the death of a ewe, mother of a living lamb. On a day which had a summer face and a winter constitution—a fine January morning, when there was just enough blue sky visible to make cheerfully-disposed people wish for more, and an occasional gleam of silvery sunshine, Oak put the lamb into a respectable Sunday basket, and stalked across the fields to the house of Mrs. Hurst, the aunt—George, the dog, walking behind, with a countenance of great concern at the serious turn pastoral affairs seemed to be taking.

Gabriel had watched the blue wood-smoke curling from the chimney with strange meditation. At evening he had fancifully traced it down the chimney to the spot of its origin—seen the hearth and Bathsheba beside it—beside it in her out-door dress; for the clothes she had worn on the hill were by association equally with her person included in the compass of his affection; they seemed at this early time of his love a necessary ingredient of the sweet mixture called Bathsheba Everdene.

He had made a toilet of a nicely-adjusted kind—of a nature between the carefully neat and the carelessly ornate—of a degree between fine-market-day and wet-Sunday selection. He thoroughly cleaned his silver watch-chain with whiting, put new lacing straps to his boots, looked to the brass eyelet-holes, went to the inmost heart of the plantation for a new walking-stick, and trimmed it vigorously on his way back; took a new handkerchief from the bottom of his clothes-box, put on the light waistcoat patterned all over with sprigs of an elegant flower uniting the beauties of both rose and lily without the defects of either, and used all the hair-oil he possessed upon his usually dry, sandy, and inextricably curly hair, till he had deepened it to a splendidly novel colour, between that of guano and Roman cement, [p](#p_1) making it stick to his head like mace round a nutmeg, or wet seaweed round a boulder after the ebb.

Nothing disturbed the stillness of the cottage save the chatter of a knot of sparrows on the eaves; one might fancy scandal and rumour to be no less the staple topic of these little coteries on roofs than of those under them. It seemed that the omen was an unpropitious one, for, as the rather untoward commencement of Oak’s overtures, just as he arrived by the garden gate he saw a cat inside, going into various arched shapes and fiendish convulsions at the sight of his dog George. The dog took no notice, for he had arrived at an age at which all superfluous barking was cynically avoided as a waste of breath—in fact, he never barked even at the sheep except to order, when it was done with an absolutely neutral countenance, as a sort of Comminationservice † which, though offensive, had to be gone through once now and then to frighten the flock for their own good.

A voice came from behind some laurel-bushes into which the cat had run:

“Poor dear! Did a nasty brute of a dog want to kill it;—did he, poor dear!”

“I beg yer pardon,” said Oak to the voice, “but George was walking on behind me with a temper as mild as milk.”

Almost before he had ceased speaking Oak was seized with a misgiving as to whose ear was the recipient of his answer. Nobody appeared, and he heard the person retreat among the bushes.

Gabriel meditated, and so deeply that he brought small furrows into his forehead by sheer force of reverie. Where the issue of an interview is as likely to be a vast change for the worse as for the better, any initial difference from expectation causes nipping sensations of failure. Oak went up to the door a little abashed: his mental rehearsal and the reality had had no common grounds of opening.

Bathsheba’s aunt was indoors. “Will you tell Miss Everdene that somebody would be glad to speak to her?” said Mr. Oak. (Calling one’s self merely Somebody, without giving a name, is not to be taken as an example of the ill-breeding of the rural world: it springs from a refined modesty of which townspeople, with their cards and announcements, have no notion whatever.)

Bathsheba was out. The voice had evidently been hers.

“Will you come in, Mr. Oak?”

“Oh, thank ‘ee,” said Gabriel, following her to the fireplace. “I’ve brought a lamb for Miss Everdene. I thought she might like one to rear; girls do.”

“She might,” said Mrs. Hurst musingly; “though she’s only a visitor here. If you will wait a minute Bathsheba will be in.”

“Yes, I will wait,” said Gabriel, sitting down. “The lamb isn’t really the business I came about, Mrs. Hurst. In short, I was going to ask her if she’d like to be married.”

“And were you indeed?”

“Yes. Because if she would I should be very glad to marry her. D’ye know if she’s got any other young man hanging about her at all?”

“Let me think,” said Mrs. Hurst, poking the fire superfluously.... “Yes—bless you, ever so many young men. You see, Farmer Oak, she’s so good-looking, and an excellent scholar besides—she was going to be a governess once, you know, only she was too wild. Not that her young men ever come here—but, Lord, in the nature of women, she must have a dozen!”

“That’s unfortunate,” said Farmer Oak, contemplating a crack in the stone floor with sorrow. “I’m only an every-day sort of man, and my only chance was in being the first comer.... Well, there’s no use in my waiting, for that was all I came about: so I’ll take myself off home-along, Mrs. Hurst.”

When Gabriel had gone about two hundred yards along the down, he heard a “hoi-hoi!” uttered behind him, in a piping note of more treble quality than that in which the exclamation usually embodies itself when shouted across a field. He looked round, and saw a girl racing after him, waving a white handkerchief.

Oak stood still—and the runner drew nearer. It was Bathsheba Everdene. Gabriel’s colour deepened: hers was already deep, not, as it appeared, from emotion, but from running.

“Farmer Oak—I—” she said, pausing for want of breath, pulling up in front of him with a slanted face, and putting her hand to her side.

“I have just called to see you,” said Gabriel pending her further speech.

“Yes—I know that,” she said, panting like a robin, her face red and moist from her exertions, like a peony petal before the sun dries off the dew. “I didn’t know you had come to ask to have me, or I should have come in from the garden instantly. I ran after you to say—that my aunt made a mistake in sending you away from courting me.”

Gabriel expanded. “I’m sorry to have made you run so fast, my dear,” he said, with a grateful sense of favours to come. “Wait a bit till you’ve found your breath.”

“—It was quite a mistake—aunt’s telling you I had a young man already,” Bathsheba went on. “I haven’t a sweetheart at all—and I never had one, and I thought that, as times go with women, it was such a pity to send you away thinking that I had several.”

“Really and truly I am glad to hear that!” said Farmer Oak, smiling one of his long special smiles, and blushing with gladness. He held out his hand to take hers, which, when she had eased her side by pressing it there, was prettily extended upon her bosom to still her loud-beating heart. Directly he seized it she put it behind her, so that it slipped through his fingers like an eel.

“I have a nice snug little farm,” said Gabriel, with half a degree less assurance than when he had seized her hand.

“Yes; you have.”

“A man has advanced me money to begin with, but still, it will soon be paid off, and though I am only an every-day sort of man I have got on a little since I was a boy.” Gabriel uttered “a little” in a tone to show her that it was the complacent form of “a great deal.” He continued: “When we be married, I am quite sure I can work twice as hard as I do now.”

He went forward and stretched out his arm again. Bathsheba had overtaken him at a point beside which stood a low stunted holly bush, now laden with red berries. Seeing his advance take the form of an attitude threatening a possible enclosure, if not compression, of her person, she edged off round the bush.

“Why, Farmer Oak,” she said over the top, looking at him with rounded eyes, “I never said I was going to marry you.”

“Well—that is a tale!” said Oak with dismay. “To run after anybody like this, and then say you don’t want him!”

“What I meant to tell you was only this,” she said eagerly, and yet half conscious of the absurdity of the position she had made for herself—“that nobody has got me yet as a sweetheart, instead of my having a dozen, as my aunt said; I hate to be thought men’s property in that way, though possibly I shall be had some day. Why, if I’d wanted you I shouldn’t have run after you like this; ’twould have been the forwardest thing! But there was no harm in hurrying to correct a piece of false news that had been told you.”

“Oh, no—no harm at all.” But there is such a thing as being too generous in expressing a judgment impulsively, and Oak added with a more appreciative sense of all the circumstances—“Well, I am not quite certain it was no harm.”

“Indeed, I hadn’t time to think before starting whether I wanted to marry or not, for you’d have been gone over the hill.”

“Come,” said Gabriel, freshening again; “think a minute or two. I’ll wait a while, Miss Everdene. Will you marry me? Do, Bathsheba. I love you far more than common!”

“I’ll try to think,” she observed rather more timorously; “if I can think out of doors; my mind spreads away so.”

“But you can give a guess.”

“Then give me time.” Bathsheba looked thoughtfully into the distance, away from the direction in which Gabriel stood.

“I can make you happy,” said he to the back of her head, across the bush. “You shall have a piano in a year or two—farmers’ wives are getting to have pianos now—and I’ll practise up the flute right well to play with you in the evenings.”

“Yes; I should like that.”

“And have one of those little ten-pound gigs[q](#q_1) for market—and nice flowers, and birds—cocks and hens I mean, because they be useful,” continued Gabriel, feeling balanced between poetry and practicality.

“I should like it very much.”

“And a frame for cucumbers—like a gentleman and lady.”

“Yes.”

“And when the wedding was over, we’d have it put in the newspaper list of marriages.”

“Dearly I should like that!”

“And the babies in the births—every man jack of ’em! And at home by the fire, whenever you look up, there I shall be—and whenever I look up, there will be you.”

“Wait, wait, and don’t be improper!”

Her countenance fell, and she was silent awhile. He regarded the red berries between them over and over again, to such an extent that holly seemed in his after life to be a cypher signifying a proposal of marriage. Bathsheba decisively turned to him.

“No; ’tis no use,” she said. “I don’t want to marry you.”

“Try.”

“I’ve tried hard all the time I’ve been thinking; for a marriage would be very nice in one sense. People would talk about me and think I had won my battle, and I should feel triumphant, and all that. But a husband—”

“Well!”

“Why, he’d always be there, as you say; whenever I looked up, there he’d be.”

“Of course he would—I, that is.”

“Well, what I mean is that I shouldn’t mind being a bride at a wedding, if I could be one without having a husband. But since a woman can’t show off in that way by herself, I shan’t marry—at least yet.”

“That’s a terrible wooden story!”

At this criticism of her statement Bathsheba made an addition to her dignity by a slight sweep away from him.

“Upon my heart and soul I don’t know what a maid can say stupider than that,” said Oak. “But dearest,” he continued in a palliative voice, “don’t be like it!” Oak sighed a deep honest sigh—none the less so in that, being like the sigh of a pine plantation, it was rather noticeable as a disturbance of the atmosphere. “Why won’t you have me?” he appealed, creeping round the holly to reach her side.

“I cannot,” she said, retreating.

“But why?” he persisted, standing still at last in despair of ever reaching her, and facing over the bush.

“Because I don’t love you.”

“Yes, but---- ”

She contracted a yawn to an inoffensive smallness, so that it was hardly ill-mannered at all. “I don’t love you,” she said.

“But I love you—and, as for myself, I am content to be liked.”

“O Mr. Oak—that’s very fine! You’d get to despise me.”

“Never,” said Mr. Oak, so earnestly that he seemed to be coming, by the force of his words, straight through the bush and into her arms. “I shall do one thing in this life—one thing certain—that is, love you, and long for you, and keep wanting you till I die.” His voice had a genuine pathos now, and his large brown hands perceptibly trembled.

“It seems dreadfully wrong not to have you when you feel so much!” she said with a little distress, and looking hopelessly around for some means of escape from her moral dilemma. “How I wish I hadn’t run after you!” However, she seemed to have a short cut for getting back to cheerfulness and set her face to signify archness. “It wouldn’t do, Mr. Oak. I want somebody to tame me; I am too independent; and you would never be able to, I know.”

Oak cast his eyes down the field in a way implying that it was useless to attempt argument.

“Mr. Oak,” she said, with luminous distinctness and common sense, “you are better off than I. I have hardly a penny in the world—I am staying with my aunt for my bare sustenance. I am better educated than you—and I don’t love you a bit: that’s my side of the case. Now yours: you are a farmer just beginning, and you ought in common prudence, if you marry at all (which you should certainly not think of doing at present) to marry a woman with money, who would stock a larger farm for you than you have now.”

Gabriel looked at her with a little surprise and much admiration.

“That’s the very thing I had been thinking myself!” he naively said.

Farmer Oak had one-and-a-half Christian characteristics too many to succeed with Bathsheba: his humility, and a superfluous moiety of honesty. Bathsheba was decidedly disconcerted.

“Well, then, why did you come and disturb me?” she said, almost angrily, if not quite, an enlarging red spot rising in each cheek. “I can’t do what I think would be—would be—”

“Right?”

“No: wise.”

“You have made an admission now, Mr. Oak,” she exclaimed with even more hauteur, and rocking her head disdainfully. “After that, do you think I could marry you? Not if I know it.”

He broke in passionately: “But don’t mistake me like that! Because I am open enough to own what every man in my shoes would have thought of, you make your colours come up your face and get crabbed with me. That about you not being good enough for me is nonsense. You speak like a lady—all the parish notice it, and your uncle at Weatherbury is, I’ve heerd, a large farmer—much larger than ever I shall be. May I call in the evening, or will you walk along with me o’ Sundays? I don’t want you to make up your mind at once, if you’d rather not.”

“No—no—I cannot. Don’t press me any more—don’t. I don’t love you—so ’twould be ridiculous,” she said, with a laugh.

No man likes to see his emotions the sport of a merry-go-round of skittishness. “Very well,” said Oak firmly, with the bearing of one who was going to give his days and nights to Ecclesiastes[r](#r_1) for ever. “Then I’ll ask you no more.”

CHAPTER V

Departure of Bathsheba—A Pastoral Tragedy

THE NEWS WHICH ONE day reached Gabriel that Bathsheba Everdene had left the neighbourhood, had an influence upon him which might have surprised any who never suspected that the more emphatic the renunciation the less absolute its character.

It may have been observed that there is no regular path for getting out of love as there is for getting in. Some people look upon marriage as a short cut that way, but it has been known to fail. Separation, which was the means that chance offered to Gabriel Oak by Bathsheba’s disappearance, though effectual with people of certain humours, is apt to idealize the removed object with others—notably those whose affection, placid and regular as it may be, flows deep and long. Oak belonged to the even-tempered order of humanity, and felt the secret fusion of himself in Bathsheba to be burning with a finer flame now that she was gone—that was all.

His incipient friendship with her aunt had been nipped by the failure of his suit, and all that Oak learnt of Bathsheba’s movements was done indirectly. It appeared that she had gone to a place called Weatherbury, more than twenty miles off, but in what capacity—whether as a visitor or permanently, he could not discover.

Gabriel had two dogs. George, the elder, exhibited an ebony-tipped nose, surrounded by a narrow margin of pink flesh, and a coat marked in random splotches approximating in colour to white and slaty grey; but the grey, after years of sun and rain, had been scorched and washed out of the more prominent locks, leaving them of a reddish-brown, as if the blue component of the grey had faded, like the indigo from the same kind of colour in Turner’s pictures. [s](#s_1) In substance it had originally been hair, but long contact with sheep seemed to be turning it by degrees into wool of a poor quality and staple.[t](#t_1)

This dog had originally belonged to a shepherd of inferior morals and dreadful temper, and the result was that George knew the exact degrees of condemnation signified by cursing and swearing of all descriptions better than the wickedest old man in the neighbourhood. Long experience had so precisely taught the animal the difference between such exclamations as “Come in!” and “D———ye, come in!” that he knew to a hair’s breadth the rate of trotting back from the ewes’ tails that each call involved, if a staggerer with the sheep-crook was to be escaped. Though old, he was clever and trustworthy still.

The young dog, George’s son, might possibly have been the image of his mother, for there was not much resemblance between him and George. He was learning the sheep-keeping business, so as to follow on at the flock when the other should die, but had got no further than the rudiments as yet—still finding an insuperable difficulty in distinguishing between doing a thing well enough and doing it too well. So earnest and yet so wrong-headed was this young dog (he had no name in particular, and answered with perfect readiness to any pleasant interjection) that if sent behind the flock to help them on he did it so thoroughly that he would have chased them across the whole county with the greatest pleasure if not called off, or reminded when to stop by the example of old George.

Thus much for the dogs. On the further side of Norcombe Hill was a chalk-pit, from which chalk had been drawn for generations, and spread over adjacent farms. Two hedges converged upon it in the form of a V, but without quite meeting. The narrow opening left, which was immediately over the brow of the pit, was protected by a rough railing.

One night, when Farmer Oak had returned to his house, believing there would be no further necessity for his attendance on the down, he called as usual to the dogs, previously to shutting them up in the outhouse till next morning. Only one responded—old George; the other could not be found, either in the house, lane, or garden. Gabriel then remembered that he had left the two dogs on the hill eating a dead lamb (a kind of meat he usually kept from them, except when other food ran short), and concluding that the young one had not finished his meal he went indoors to the luxury of a bed, which latterly he had only enjoyed on Sundays.

It was a still, moist night. Just before dawn he was assisted in waking by the abnormal reverberation of familiar music. To the shepherd, the note of the sheep-bell, like the ticking of the clock to other people, is a chronic sound that only makes itself noticed by ceasing or altering in some unusual manner from the well-known idle tinkle which signifies to the accustomed ear, however distant, that all is well in the fold. In the solemn calm of the awakening morn that note was heard by Gabriel, beating with unusual violence and rapidity. This exceptional ringing may be caused in two ways—by the rapid feeding of the sheep bearing the bell, as when the flock breaks into new pasture, which gives it an intermittent rapidity, or by the sheep starting off in a run, when the sound has a regular palpitation. The experienced ear of Oak knew the sound he now heard to be caused by the running of the flock with great velocity.

He jumped out of bed, dressed, tore down the lane through a foggy dawn, and ascended the hill. The forward ewes[u](#u_1) were kept apart from those among which the fall of lambs would be later, there being two hundred of the latter class in Gabriel’s flock. These two hundred seemed to have absolutely vanished from the hill. There were the fifty with their lambs, enclosed at the other end as he had left them, but the rest, forming the bulk of the flock, were nowhere. Gabriel called at the top of his voice the shepherd’s call:

“Ovey, ovey, ovey!”†

Not a single bleat. He went to the hedge; a gap had been broken through it, and in the gap were the footprints of the sheep. Rather surprised to find them break fence at this season, yet putting it down instantly to their great fondness for ivy in wintertime, of which a great deal grew in the plantation, he followed through the hedge. They were not in the plantation. He called again: the valleys and furthest hills resounded as when the sailors invoked the lost Hylas on the Mysian shore;[4](#4_1) but no sheep. He passed through the trees and along the ridge of the hill. On the extreme summit, where the ends of the two converging hedges of which we have spoken were stopped short by meeting the brow of the chalk-pit, he saw the younger dog standing against the sky—dark and motionless as Napoleon at St. Helena.[v](#v_1)

A horrible conviction darted through Oak. With a sensation of bodily faintness he advanced: at one point the rails were broken through, and there he saw the footprints of his ewes. The dog came up, licked his hand, and made signs implying that he expected some great reward for signal services rendered. Oak looked over the precipice. The ewes lay dead and dying at its foot—a heap of two hundred mangled carcases, representing in their condition just now at least two hundred more.

Oak was an intensely humane man: indeed, his humanity often tore in pieces any politic intentions of his which bordered on strategy, and carried him on as by gravitation. A shadow in his life had always been that his flock ended in mutton—that a day came and found every shepherd an arrant traitor to his defenceless sheep. His first feeling now was one of pity for the untimely fate of these gentle ewes and their unborn lambs.

It was a second to remember another phase of the matter. The sheep were not insured. All the savings of a frugal life had been dispersed at a blow; his hopes of being an independent farmer were laid low—possibly for ever. Gabriel’s energies, patience, and industry had been so severely taxed during the years of his life between eighteen and eight-and-twenty, to reach his present stage of progress, that no more seemed to be left in him. He leant down upon a rail, and covered his face with his hands.

Stupors, however, do not last for ever, and Farmer Oak recovered from his. It was as remarkable as it was characteristic that the one sentence he uttered was in thankfulness:—

“Thank God I am not married: what would she have done in the poverty now coming upon me!”

Oak raised his head, and wondering what he could do, listlessly surveyed the scene. By the outer margin of the pit was an oval pond, and over it hung the attenuated skeleton of a chrome-yellow moon, which had only a few days to last—the morning star dogging her on the left hand. The pool glittered like a dead man’s eye, and as the world awoke a breeze blew, shaking and elongating the reflection of the moon without breaking it, and turning the image of the star to a phosphoric streak upon the water. All this Oak saw and remembered.

As far as could be learnt it appeared that the poor young dog, still under the impression that since he was kept for running after sheep, the more he ran after them the better, had at the end of his meal off the dead lamb, which may have given him additional energy and spirits, collected all the ewes into a corner, driven the timid creatures through the hedge, across the upper field, and by main force of worrying had given them momentum enough to break down a portion of the rotten railing, and so hurled them over the edge.

George’s son had done his work so thoroughly that he was considered too good a workman to live, and was, in fact, taken and tragically shot at twelve o’clock that same day—another instance of the untoward fate which so often attends dogs and other philosophers who follow out a train of reasoning to its logical conclusion, and attempt perfectly consistent conduct in a world made up so largely of compromise.

Gabriel’s farm had been stocked by a dealer—on the strength of Oak’s promising look and character—who was receiving a percentage from the farmer till such time as the advance should be cleared off Oak found that the value of stock, plant, and implements which were really his own would be about sufficient to pay his debts, leaving himself a free man with the clothes he stood up in, and nothing more.

CHAPTER VI

The Fair—The Journey—The Fire

TWO MONTHS PASSED AWAY. We are brought on to a day in February, on which was held the yearly statute or hiring fair in the county-town of Casterbridge.

At one end of the street stood from two to three hundred blithe and hearty labourers waiting upon Chance—all men of the stamp to whom labour suggests nothing worse than a wrestle with gravitation, and pleasure nothing better than a renunciation of the same. Among these, carters and waggoners were distinguished by having a piece of whip-cord twisted round their hats; thatchers wore a fragment of woven straw; shepherds held their sheep-crooks in their hands; and thus the situation required was known to the hirers at a glance.

In the crowd was an athletic young fellow of somewhat superior appearance to the rest—in fact, his superiority was marked enough to lead several ruddy peasants standing by to speak to him inquiringly, as to a farmer, and to use “Sir” as a finishing word. His answer always was,—

“I am looking for a place myself—a bailiff’s.[w](#w_1) Do ye know of anybody who wants one?”

Gabriel was paler now. His eyes were more meditative, and his expression was more sad. He had passed through an ordeal of wretchedness which had given him more than it had taken away. He had sunk from his modest elevation as pastoral king into the very slime-pits of Siddim;† but there was left to him a dignified calm he had never before known, and that indifference to fate which, though it often makes a villain of a man, is the basis of his sublimity when it does not. And thus the abasement had been exaltation, and the loss gain.

In the morning a regiment of cavalry had left the town, and a sergeant and his party had been beating up for recruits through the four streets. As the end of the day drew on, and he found himself not hired, Gabriel almost wished that he had joined them, and gone off to serve his country. Weary of standing in the marketplace, and not much minding the kind of work he turned his hand to, he decided to offer himself in some other capacity than that of bailiff.

All the farmers seemed to be wanting shepherds. Sheep-tending was Gabriel’s specialty. Turning down an obscure street and entering an obscurer lane, he went up to a smith’s shop.

“How long would it take you to make a shepherd’s crook?”

“Twenty minutes.”

“How much?”

“Two shillings.”

He sat on a bench and the crook was made, a stem being given him into the bargain.

He then went to a ready-made clothes shop, the owner of which had a large rural connection. As the crook had absorbed most of Gabriel’s money, he attempted, and carried out, an exchange of his overcoat for a shepherd’s regulation smock-frock.

This transaction having been completed he again hurried off to the centre of the town, and stood on the kerb of the pavement, as a shepherd, crook in hand.

Now that Oak had turned himself into a shepherd it seemed that bailiffs were most in demand. However, two or three farmers noticed him and drew near. Dialogues followed, more or less in the subjoined form:—

“Where do you come from?”

“Norcombe.”

“That’s a long way.”

“Fifteen miles.”

“Whose farm were you upon last?”

“My own.”

This reply invariably operated like a rumour of cholera. The inquiring farmer would edge away and shake his head dubiously. Gabriel, like his dog, was too good to be trustworthy, and he never made advance beyond this point.

It is safer to accept any chance that offers itself, and extemporize a procedure to fit it, than to get a good plan matured, and wait for a chance of using it. Gabriel wished he had not nailed up his colours as a shepherd, but had laid himself out for anything in the whole cycle of labour that was required in the fair. It grew dusk. Some merry men were whistling and singing by the corn-exchange. Gabriel’s hand, which had lain for some time idle in his smock-frock pocket, touched his flute, which he carried there. Here was an opportunity for putting his dearly bought wisdom into practice.

He drew out his flute and began to play “Jockey to the Fair”[x](#x_1) in the style of a man who had never known a moment’s sorrow. Oak could pipe with Arcadian sweetness,† and the sound of the well-known notes cheered his own heart as well as those of the loungers. He played on with spirit, and in half an hour had earned in pence what was a small fortune to a destitute man.

By making inquiries he learnt that there was another fair at Shottsford the next day.

“How far is Shottsford?”

“Ten miles t’ other side of Weatherbury.”

Weatherbury! It was where Bathsheba had gone two months before. This information was like coming from night into noon.

“How far is it to Weatherbury?”

“Five or six miles.”

Bathsheba had probably left Weatherbury long before this time, but the place had enough interest attaching to it to lead Oak to choose Shottsford fair as his next field of inquiry, because it lay in the Weatherbury quarter. Moreover, the Weatherbury folk were by no means uninteresting intrinsically. If report spoke truly they were as hardy, merry, thriving, wicked a set as any in the whole county. Oak resolved to sleep at Weatherbury that night on his way to Shottsford, and struck out at once into the high road which had been recommended as the direct route to the village in question.

The road stretched through water-meadows traversed by little brooks, whose quivering surfaces were braided along their centres, and folded into creases at the sides; or, where the flow was more rapid, the stream was pied with spots of white froth, which rode on in undisturbed serenity. On the higher levels the dead and dry carcases of leaves tapped the ground as they bowled along helter-skelter upon the shoulders of the wind, and little birds in the hedges were rustling their feathers and tucking themselves in comfortably for the night, retaining their places if Oak kept moving, but flying away if he stopped to look at them. He passed by Yalbury Wood where the game-birds were rising to their roosts, and heard the crack-voiced cock-pheasants’ “cu-uck, cuck,” and the wheezy whistle of the hens.

By the time he had walked three or four miles every shape in the landscape had assumed a uniform hue of blackness. He descended Yalbury Hill and could just discern ahead of him a waggon, drawn up under a great over-hanging tree by the roadside.

On coming close, he found there were no horses attached to it, the spot being apparently quite deserted. The waggon, from its position, seemed to have been left there for the night, for beyond about half a truss of hay which was heaped in the bottom, it was quite empty. Gabriel sat down on the shafts of the vehicle and considered his position. He calculated that he had walked a very fair proportion of the journey; and having been on foot since daybreak, he felt tempted to lie down upon the hay in the waggon instead of pushing on to the village of Weatherbury, and having to pay for a lodging.

Eating his last slices of bread and ham, and drinking from the bottle of cider he had taken the precaution to bring with him, he got into the lonely waggon. Here he spread half of the hay as a bed, and, as well as he could in the darkness, pulled the other half over him by way of bed-clothes, covering himself entirely, and feeling, physically, as comfortable as ever he had been in his life. Inward melancholy it was impossible for a man like Oak, introspective far beyond his neighbours, to banish quite, whilst conning the present untoward page of his history. So, thinking of his misfortunes, amorous and pastoral, he fell asleep, shepherds enjoying, in common with sailors, the privilege of being able to summon the god[y](#y_1) instead of having to wait for him.

On somewhat suddenly awaking, after a sleep of whose length he had no idea, Oak found that the waggon was in motion. He was being carried along the road at a rate rather considerable for a vehicle without springs, and under circumstances of physical uneasiness, his head being dandled up and down on the bed of the waggon like a kettledrum-stick. He then distinguished voices in conversation, coming from the forepart of the waggon. His concern at this dilemma (which would have been alarm, had he been a thriving man; but misfortune is a fine opiate to personal terror) led him to peer cautiously from the hay, and the first sight he beheld was the stars above him. Charles’s Wain was getting towards a right angle with the Pole star, and Gabriel concluded that it must be about nine o’clock—in other words, that he had slept two hours. This small astronomical calculation was made without any positive effort, and whilst he was stealthily turning to discover, if possible, into whose hands he had fallen.

Two figures were dimly visible in front, sitting with their legs outside the waggon, one of whom was driving. Gabriel soon found that this was the waggoner, and it appeared they had come from Casterbridge fair, like himself.

A conversation was in progress, which continued thus:—

“Be as ’twill, she’s a fine handsome body as far’s looks be concerned. But that’s only the skin of the woman, and these dandy cattle be as proud as a lucifer in their insides.”

“Ay—so ‘a do seem, Billy Smallbury—so ’a do seem.” This utterance was very shaky by nature, and more so by circumstance, the jolting of the waggon not being without its effect upon the speaker’s larynx. It came from the man who held the reins.

“She’s a very vain feymell—so ’tis said here and there.”

“Ah, now. If so be ’tis like that, I can’t look her in the face. Lord, no: not I—heh-heh-heh! Such a shy man as I be!”

“Yes—she’s very vain. ’Tis said that every night at going to bed she looks in the glass to put on her nightcap properly.”

“And not a married woman. Oh, the world!”

“And ‘a can play the peanner, so ’tis said. Can play so clever that ’a can make a psalm tune sound as well as the merriest loose song a man can wish for.”

“D‘ye tell o’t! A happy time for us, and I feel quite a new man! And how do she pay?”

“That I don’t know, Master Poorgrass.”

On hearing these and other similar remarks, a wild thought flashed into Gabriel’s mind that they might be speaking of Bathsheba. There were, however, no grounds for retaining such a supposition, for the waggon, though going in the direction of Weatherbury, might be going beyond it, and the woman alluded to seemed to be the mistress of some estate. They were now apparently close upon Weatherbury, and not to alarm the speakers unnecessarily Gabriel slipped out of the waggon unseen.

He turned to an opening in the hedge, which he found to be a gate, and mounting thereon he sat meditating whether to seek a cheap lodging in the village, or to ensure a cheaper one by lying under some hay or corn stack. The crunching jangle of the waggon died upon his ear. He was about to walk on, when he noticed on his left hand an unusual light—appearing about half a mile distant. Oak watched it, and the glow increased. Something was on fire.

Gabriel again mounted the gate, and, leaping down on the other side upon what he found to be ploughed soil, made across the field in the exact direction of the fire. The blaze, enlarging in a double ratio by his approach and its own increase, showed him as he drew nearer the outlines of ricks[z](#z_1) beside it, lighted up to great distinctness. A rick-yard was the source of the fire. His weary face now began to be painted over with a rich orange glow, and the whole front of his smock-frock and gaiters was covered with a dancing shadow pattern of thorn-twigs—the light reaching him through a leafless intervening hedge—and the metallic curve of his sheep-crook shone silver-bright in the same abounding rays. He came up to the boundary fence, and stood to regain breath. It seemed as if the spot was unoccupied by a living soul.

The fire was issuing from a long straw-stack, which was so far gone as to preclude a possibility of saving it. A rick burns differently from a house. As the wind blows the fire inwards, the portion in flames completely disappears like melting sugar, and the outline is lost to the eye. However, a hay or a wheat rick, well put together, will resist combustion for a length of time if it begins on the outside.

This before Gabriel’s eyes was a rick of straw, loosely put together, and the flames darted into it with lightning swiftness. It glowed on the windward side, rising and falling in intensity like the coal of a cigar. Then a superincumbent bundle rolled down with a whisking noise; flames elongated, and bent themselves about with a quiet roar, but no crackle. Banks of smoke went off horizontally at the back like passing clouds, and behind these burned hidden pyres, illuminating the semi-transparent sheet of smoke to a lustrous yellow uniformity. Individual straws in the foreground were consumed in a creeping movement of ruddy heat, as if they were knots of red worms, and above shone imaginary fiery faces, tongues hanging from lips, glaring eyes, and other impish forms, from which at intervals sparks flew in clusters like birds from a nest.

Oak suddenly ceased from being a mere spectator by discovering the case to be more serious than he had at first imagined. A scroll of smoke blew aside and revealed to him a wheat-rick in startling juxtaposition with the decaying one, and behind this a series of others, composing the main corn[aa](#aa_1) produce of the farm; so that instead of the straw-stack standing, as he had imagined, comparatively isolated, there was a regular connection between it and the remaining stacks of the group.

Gabriel leapt over the hedge, and saw that he was not alone. The first man he came to was running about in a great hurry, as if his thoughts were several yards in advance of his body, which they could never drag on fast enough.

“O, man—fire, fire! A good master and a bad servant is fire, fire!—I mane a bad servant and a good master. O Mark Clark—come! And you, Billy Smallbury—and you, Maryann Money—and you, Jan Coggan, and Matthew there!” Other figures now appeared behind this shouting man and among the smoke, and Gabriel found that, far from being alone, he was in a great company—whose shadows danced merrily up and down, timed by the jigging of the flames, and not at all by their owners’ movements. The assemblage—belonging to that class of society which casts its thoughts into the form of feeling, and its feelings into the form of commotion—set to work with a remarkable confusion of purpose.

“Stop the draught under the wheat-rick!” cried Gabriel to those nearest to him. The corn stood on stone staddles,[ab](#ab_1) and between these, tongues of yellow hue from the burning straw licked and darted playfully. If the fire once got under this stack, all would be lost.

“Get a tarpaulin—quick!” said Gabriel.

A rick-cloth was brought, and they hung it like a curtain across the channel. The flames immediately ceased to go under the bottom of the corn-stack, and stood up vertical.

“Stand here with a bucket of water and keep the cloth wet,” said Gabriel again.

The flames, now driven upwards, began to attack the angles of the huge roof covering the wheat-stack.

“A ladder,” cried Gabriel.

“The ladder was against the straw-rick and is burnt to a cinder,” said a spectre-like form in the smoke.

Oak seized the cut ends of the sheaves, as if he were going to engage in the operation of “reed-drawing,”† and digging in his feet, and occasionally sticking in the stem of his sheep-crook, he clambered up the beetling face. He at once sat astride the very apex, and began with his crook to beat off the fiery fragments which had lodged thereon, shouting to the others to get him a bough and a ladder, and some water.

Billy Smallbury—one of the men who had been on the waggon—by this time had found a ladder, which Mark Clark ascended, holding on beside Oak upon the thatch. The smoke at this corner was stifling, and Clark, a nimble fellow, having been handed a bucket of water, bathed Oak’s face and sprinkled him generally, whilst Gabriel, now with a long beech-bough in one hand, in addition to his crook in the other, kept sweeping the stack and dislodging all fiery particles.

On the ground the groups of villagers were still occupied in doing all they could to keep down the conflagration, which was not much. They were all tinged orange, and backed up by shadows of varying pattern. Round the corner of the largest stack, out of the direct rays of the fire, stood a pony, bearing a young woman on its back. By her side was another woman, on foot. These two seemed to keep at a distance from the fire, that the horse might not become restive.

“He’s a shepherd,” said the woman on foot. “Yes—he is. See how his crook shines as he beats the rick with it. And his smock-frock is burnt in two holes, I declare! A fine young shepherd he is too, ma’am.”

“Whose shepherd is he?” said the equestrian in a clear voice.

“Don’t know, ma’am.”

“Don’t any of the others know?”

“Nobody at all—I’ve asked ’em. Quite a stranger, they say.”

The young woman on the pony rode out from the shade and looked anxiously around.

“Do you think the barn is safe?” she said.

“D’ye think the barn is safe, Jan Coggan?” said the second woman, passing on the question to the nearest man in that direction.

“Safe now—leastwise I think so. If this rick had gone the barn would have followed. ’Tis that bold shepherd up there that have done the most good—he sitting on the top o’ rick, whizzing his great long arms about like a windmill.”

“He does work hard,” said the young woman on horseback, looking up at Gabriel through her thick woollen veil. “I wish he was shepherd here. Don’t any of you know his name?”

“Never heard the man’s name in my life, or seed his form afore.”

The fire began to get worsted, and Gabriel’s elevated position being no longer required of him, he made as if to descend.

“Maryann,” said the girl on horseback, “go to him as he comes down, and say that the farmer wishes to thank him for the great service he has done.”

Maryann stalked off towards the rick and met Oak at the foot of the ladder. She delivered her message.

“Where is your master the farmer?” asked Gabriel, kindling with the idea of getting employment that seemed to strike him now.

“ ‘Tisn’t a master; ’tis a mistress, shepherd.”

“A woman farmer?”

“Ay, ‘a b’lieve, and a rich one too!” said a bystander. “Lately ’a came here from a distance. Took on her uncle’s farm, who died suddenly. Used to measure his money in half-pint cups. They say now that she’ve business in every bank in Casterbridge, and thinks no more of playing pitch-and-toss sovereign than you and I do pitch-halfpenny [ac](#ac_1)—not a bit in the world, shepherd.”

“That’s she, back there upon the pony,” said Maryann; “wi’ her face a—covered up in that black cloth with holes in it.”

Oak, his features smudged, grimy, and undiscoverable from the smoke and heat, his smock-frock burnt into holes and dripping with water, the ash stem of his sheep-crook charred six inches shorter, advanced with the humility stern adversity had thrust upon him up to the slight female form in the saddle. He lifted his hat with respect, and not without gallantry: stepping close to her hanging feet he said in a hesitating voice,—

“Do you happen to want a shepherd, ma’am?”

She lifted the wool veil tied round her face, and looked all astonishment. Gabriel and his cold-hearted darling, Bathsheba Everdene, were face to face.

Bathsheba did not speak, and he mechanically repeated in an abashed and sad voice,—

“Do you want a shepherd, ma’am?”

CHAPTER VII

Recognition—A Timid Girl

BATHSHEBA WITHDREW INTO THE shade. She scarcely knew whether most to be amused at the singularity of the meeting, or to be concerned at its awkwardness. There was room for a little pity, also for a very little exultation: the former at his position, the latter at her own. Embarrassed she was not, and she remembered Gabriel’s declaration of love to her at Norcombe only to think she had nearly forgotten it.

“Yes,” she murmured, putting on an air of dignity, and turning again to him with a little warmth of cheek; “I do want a shepherd. But—”

“He’s the very man, ma’am,” said one of the villagers, quietly.

Conviction breeds conviction. “Ay, that ’a is,” said a second, decisively.

“The man, truly!” said a third, with heartiness.

“He’s all there!” said number four, fervidly.

“Then will you tell him to speak to the bailiff?” said Bathsheba.

All was practical again now. A summer eve and loneliness would have been necessary to give the meeting its proper fulness of romance.

The bailiff was pointed out to Gabriel, who, checking the palpitation within his breast at discovering that this Ashtoreth[ad](#ad_1) of strange report was only a modification of Venus the well-known and admired, retired with him to talk over the necessary preliminaries of hiring.

The fire before them wasted away. “Men,” said Bathsheba, “you shall take a little refreshment after this extra work. Will you come to the house?”

“We could knock in a bit and a drop a good deal freer, Miss, if so be ye’d send it to Warren’s Malthouse,” replied the spokesman.

Bathsheba then rode off into the darkness, and the men straggled on to the village in twos and threes—Oak and the bailiff being left by the rick alone.

“And now,” said the bailiff, finally, “all is settled, I think, about your coming, and I am going home-along. Good-night to ye, shepherd.”

“Can you get me a lodging?” inquired Gabriel.

“That I can‘t, indeed,” he said, moving past Oak as a Christian edges past an offertory-plate when he does not mean to contribute. “If you follow on the road till you come to Warren’s Malthouse, where they are all gone to have their snap[ae](#ae_1) of victuals, I daresay some of ’em will tell you of a place. Good-night to ye, shepherd.”

The bailiff who showed this nervous dread of loving his neighbour as himself, went up the hill, and Oak walked on to the village, still astonished at the rencounter with Bathsheba, glad of his nearness to her, and perplexed at the rapidity with which the unpractised girl of Norcombe had developed into the supervising and cool woman here. But some women only require an emergency to make them fit for one.

Obliged to some extent to forego dreaming in order to find the way, he reached the churchyard, and passed round it under the wall where several ancient trees grew. There was a wide margin of grass along here, and Gabriel’s footsteps were deadened by its softness, even at this indurating period of the year. When abreast of a trunk which appeared to be the oldest of the old, he became aware that a figure was standing behind it. Gabriel did not pause in his walk, and in another moment he accidentally kicked a loose stone. The noise was enough to disturb the motionless stranger, who started and assumed a careless position.

It was a slim girl, rather thinly clad.

“Good-night to you,” said Gabriel heartily.

“Good-night,” said the girl to Gabriel.

The voice was unexpectedly attractive; it was the low and dulcet note suggestive of romance; common in descriptions, rare in experience.

“I’ll thank you to tell me if I’m in the way for Warren’s Malthouse?” Gabriel resumed, primarily to gain the information, indirectly to get more of the music.

“Quite right. It’s at the bottom of the hill. And do you know—” The girl hesitated and then went on again. “Do you know how late they keep open the Buck’s Head Inn?” She seemed to be won by Gabriel’s heartiness, as Gabriel had been won by her modulations.

“I don’t know where the Buck’s Head is, or anything about it. Do you think of going there to-night?”

“Yes—” The woman again paused. There was no necessity for any continuance of speech, and the fact that she did add more seemed to proceed from an unconscious desire to show unconcern by making a remark, which is noticeable in the ingenuous when they are acting by stealth. “You are not a Weatherbury man?” she said timorously.

“I am not. I am the new shepherd—just arrived.”

“Only a shepherd—and you seem almost a farmer by your ways.”

“Only a shepherd,” Gabriel repeated, in a dull cadence of finality His thoughts were directed to the past, his eyes to the feet of the girl; and for the first time he saw lying there a bundle of some sort. She may have perceived the direction of his face, for she said coaxingly,—

“You won’t say anything in the parish about having seen me here, will you—at least, not for a day or two?”

“I won’t if you wish me not to,” said Oak.

“Thank you, indeed,” the other replied. “I am rather poor, and I don’t want people to know anything about me.” Then she was silent and shivered.

“You ought to have a cloak on such a cold night,” Gabriel observed. “I would advise ’ee to get indoors.”

“O no! Would you mind going on and leaving me? I thank you much for what you have told me.”

“I will go on,” he said; adding hesitatingly,—“Since you are not very well off, perhaps you would accept this trifle from me. It is only a shilling, but it is all I have to spare.”

“Yes, I will take it,” said the stranger gratefully.

She extended her hand; Gabriel his. In feeling for each other’s palm in the gloom before the money could be passed, a minute incident occurred which told much. Gabriel’s fingers alighted on the young woman’s wrist. It was beating with a throb of tragic intensity. He had frequently felt the same quick, hard beat in the femoral artery of his lambs when overdriven. It suggested a consumption too great of a vitality which, to judge from her figure and stature, was already too little.

“What is the matter?”

“Nothing.”

“But there is?”

“No, no, no! Let your having seen me be a secret!”

“Very well; I will. Good-night, again.”

“Good-night.”

The young girl remained motionless by the tree, and Gabriel descended into the village of Weatherbury, or Lower Longpuddle as it was sometimes called. He fancied that he had felt himself in the penumbra of a very deep sadness when touching that slight and fragile creature. But wisdom lies in moderating mere impressions, and Gabriel endeavoured to think little of this.

CHAPTER VIII

The Malthouse—The Chat—News

WARREN’S MALTHOUSE WAS ENCLOSED by an old wall inwrapped with ivy, and though not much of the exterior was visible at this hour, the character and purposes of the building were clearly enough shown by its outline upon the sky. From the walls an overhanging thatched roof sloped up to a point in the centre, upon which rose a small wooden lantern, fitted with louvre-boards on all the four sides, and from these openings a mist was dimly perceived to be escaping into the night air. There was no window in front; but a square hole in the door was glazed with a single pane, through which red, comfortable rays now stretched out upon the ivied wall in front. Voices were to be heard inside.

Oak’s hand skimmed the surface of the door with fingers extended to an Elymas-the-Sorcerer pattern,[af](#af_1) till he found a leathern strap, which he pulled. This lifted a wooden latch, and the door swung open.

The room inside was lighted only by the ruddy glow from the kiln mouth, which shone over the floor with the streaming horizontality of the setting sun, and threw upwards the shadows of all facial irregularities in those assembled around. The stone-flag floor was worn into a path from the doorway to the kiln, and into undulations everywhere. A curved settle of unplaned oak stretched along one side, and in a remote corner was a small bed and bedstead, the owner and frequent occupier of which was the maltster.

This aged man was now sitting opposite the fire, his frosty white hair and beard overgrowing his gnarled figure like the grey moss and lichen upon a leafless apple-tree. He wore breeches and the laced-up shoes called ankle-jacks; he kept his eyes fixed upon the fire.

Gabriel’s nose was greeted by an atmosphere laden with the sweet smell of new malt. The conversation (which seemed to have been concerning the origin of the fire) immediately ceased, and every one ocularly criticized him to the degree expressed by contracting the flesh of their foreheads and looking at him with narrowed eyelids, as if he had been a light too strong for their sight. Several exclaimed meditatively, after this operation had been completed:—

“Oh, ‘tis the new shepherd, ’a b’lieve.”

“We thought we heard a hand pawing about the door for the bobbin, but weren’t sure ’twere not a dead leaf blowed across,” said another. “Come in, shepherd; sure ye be welcome, though we don’t know yer name.”

“Gabriel Oak, that’s my name, neighbours.”

The ancient maltster sitting in the midst turned at this—his turning being as the turning of a rusty crane.

“That’s never Gable Oak’s grandson over at Norcombe—never!” he said, as a formula expressive of surprise, which nobody was supposed to take literally.

“My father and my grandfather were old men of the name of Gabriel,” said the shepherd placidly.

“Thought I knowed the man’s face as I seed him on the rick!—thought I did! And where be ye trading o’t to now, shepherd?”

“I’m thinking of biding here,” said Mr. Oak.

“Knowed yer grandfather for years and years!” continued the maltster, the words coming forth of their own accord as if the momentum previously imparted had been sufficient.

“Ah—and did you!”

“Knowed yer grandmother.”

“And her too!”

“Likewise knowed yer father when he was a child. Why, my boy Jacob there and your father were sworn brothers—that they were sure—weren’t ye, Jacob?”

“Ay, sure,” said his son, a young man about sixty-five, with a semi-bald head and one tooth in the left centre of his upper jaw, which made much of itself by standing prominent, like a milestone in a bank. “But ’twas Joe had most to do with him. However, my son William must have knowed the very man afore us—didn’t ye, Billy, afore ye left Norcombe?”

“No, ’twas Andrew,” said Jacob’s son Billy, a child of forty, or thereabouts, who manifested the peculiarity of possessing a cheerful soul in a gloomy body, and whose whiskers were assuming a chinchilla shade here and there.

“I can mind Andrew,” said Oak, “as being a man in the place when I was quite a child.”

“Ay—the other day I and my youngest daughter, Liddy, were over at my grandson’s christening,” continued Billy. “We were talking about this very family, and ’twas only last Purification Day in this very world, when the use-money[ag](#ag_1) is gied away to the second-best poor folk, you know, shepherd, and I can mind the day because they all had to traypse up to the vestry—yes, this very man’s family.”

“Come, shepherd, and drink. ‘Tis gape and swaller with us—a drap of sommit, but not of much account,” said the maltster, removing from the fire his eyes, which were vermilion-red and bleared by gazing into it for so many years. “Take up the God-forgive-me, Jacob. See if ’tis warm, Jacob.”

Jacob stooped to the God-forgive-me, which was a two-handled tall mug standing in the ashes, cracked and charred with heat: it was rather furred with extraneous matter about the outside, especially in the crevices of the handles, the innermost curves of which may not have seen daylight for several years by reason of this encrustation thereon—formed of ashes accidentally wetted with cider and baked hard; but to the mind of any sensible drinker the cup was no worse for that, being incontestably clean on the inside and about the rim. It may be observed that such a class of mug is called a God-forgive-me in Weatherbury and its vicinity for uncertain reasons; probably because its size makes any given toper feel ashamed of himself when he sees its bottom in drinking it empty.

Jacob, on receiving the order to see if the liquor was warm enough, placidly dipped his forefinger into it by way of thermometer, and having pronounced it nearly of the proper degree, raised the cup and very civilly attempted to dust some of the ashes from the bottom with the skirt of his smock-frock, because Shepherd Oak was a stranger.

“A clane cup for the shepherd,” said the maltster commandingly.

“No—not at all,” said Gabriel, in a reproving tone of considerateness. “I never fuss about dirt in its pure state, and when I know what sort it is.” Taking the mug he drank an inch or more from the depth of its contents, and duly passed it to the next man. “I wouldn’t think of giving such trouble to neighbours in washing up when there’s so much work to be done in the world already,” continued Oak in a moister tone, after recovering from the stoppage of breath which is occasioned by pulls at large mugs.

“A right sensible man,” said Jacob.

“True, true; it can’t be gainsaid!” observed a brisk young man—Mark Clark by name, a genial and pleasant gentleman, whom to meet anywhere in your travels was to know, to know was to drink with, and to drink with was, unfortunately, to pay for.

“And here’s a mouthful of bread and bacon that mis‘ess have sent, shepherd. The cider will go down better with a bit of victuals. Don’t ye chaw quite close, shepherd, for I let the bacon fall in the road outside as I was bringing it along, and may be ’tis rather gritty. There, ’tis clane dirt; and we all know what that is, as you say, and you bain’t a particular man we see, shepherd.”

“True, true—not at all,” said the friendly Oak.

“Don’t let your teeth quite meet, and you won’t feel the sandiness at all. Ah! ’tis wonderful what can be done by contrivance!”

“My own mind exactly, neighbour.”

“Ah, he’s his grandfer’s own grandson!—his grandfer were just such a nice unparticular man!” said the maltster.

“Drink, Henry Fray—drink,” magnanimously said Jan Coggan, a person who held Saint-Simonian notions[ah](#ah_1) of share and share alike where liquor was concerned, as the vessel showed signs of approaching him in its gradual revolution among them.

Having at this moment reached the end of a wistful gaze into mid-air, Henry did not refuse. He was a man of more than middle age, with eyebrows high up in his forehead, who laid it down that the law of the world was bad, with a long-suffering look through his listeners at the world alluded to, as it presented itself to his imagination. He always signed his name “Henery”—strenuously insisting upon that spelling, and if any passing schoolmaster ventured to remark that the second “e” was superfluous and old-fashioned, he received the reply that “H-e-n-e-r-y” was the name he was christened and the name he would stick to—in the tone of one to whom orthographical differences were matters which had a great deal to do with personal character.

Mr. Jan Coggan, who had passed the cup to Henery, was a crimson man with a spacious countenance and private glimmer in his eye, whose name had appeared on the marriage register of Weatherbury and neighbouring parishes as best man and chief witness in countless unions of the previous twenty years; he also very frequently filled the post of head godfather in baptisms of the subtly-jovial kind.

“Come, Mark Clark—come. Ther’s plenty more in the barrel,” said Jan.

“Ay—that I will; ’tis my only doctor,” replied Mr. Clark, who, twenty years younger than Jan Coggan, revolved in the same orbit. He secreted mirth on all occasions for special discharge at popular parties.

“Why, Joseph Poorgrass, ye han’t had a drop!” said Mr. Coggan to a self-conscious man in the background, thrusting the cup towards him.

“Such a modest man as he is!” said Jacob Smallbury. “Why, ye’ve hardly had strength of eye enough to look in our young mis’ess’s face, so I hear, Joseph?”

All looked at Joseph Poorgrass with pitying reproach.

“No—I’ve hardly looked at her at all,” simpered Joseph, reducing his body smaller whilst talking, apparently from a meek sense of undue prominence. “And when I seed her, ’twas nothing but blushes with me!”

“Poor feller,” said Mr. Clark.

“’Tis a curious nature for a man,” said Jan Coggan.

“Yes,” continued Joseph Poorgrass—his shyness, which was so painful as a defect, filling him with a mild complacency now that it was regarded as an interesting study. “’Twere blush, blush, blush with me every minute of the time, when she was speaking to me.”

“I believe ye, Joseph Poorgrass, for we all know ye to be a very bashful man.”

“’Tis a’ awkward gift for a man, poor soul,” said the maltster. “And ye have suffered from it a long time, we know.”

“Ay, ever since I was a boy. Yes—mother was concerned to her heart about it—yes. But ’twas all nought.”

“Did ye ever go into the world to try and stop it, Joseph Poorgrass?”

“Oh ay, tried all sorts o’ company. They took me to Greenhill Fair, and into a great gay jerry-go-nimble show,[ai](#ai_1) where there were women-folk riding round—standing upon horses, with hardly anything on but their smocks; but it didn’t cure me a morsel. And then I was put errand-man at the Women’s Skittle Alley at the back of the Tailor’s Arms in Casterbridge. ‘Twas a horrible sinful situation, and a very curious place for a good man. I had to stand and look ba’dy†people in the face from morning till night; but ‘twas no use—I was just as bad as ever after all. Blushes hev been in the family for generations. There, ’tis a happy providence that I be no worse.”

“True,” said Jacob Smallbury, deepening his thoughts to a pro-founder view of the subject. “ ’Tis a thought to look at, that ye might have been worse; but even as you be, ’tis a very bad affliction for ‘ee, Joseph. For ye see, shepherd, though ’tis very well for a woman, dang it all, ’tis awkward for a man like him, poor feller?”

“ ’Tis—’tis,” said Gabriel, recovering from a meditation. “Yes, very awkward for the man.”

“Ay, and he’s very timid, too,” observed Jan Coggan. “Once he had been working late at Yalbury Bottom, and had had a drap of drink, and lost his way as he was coming home-along through Yalbury Wood, didn’t ye, Master Poorgrass?”

“No, no, no; not that story!” expostulated the modest man, forcing a laugh to bury his concern.

“—And so ’a lost himself quite,” continued Mr. Coggan, with an impassive face, implying that a true narrative, like time and tide, must run its course and would respect no man. “And as he was coming along in the middle of the night, much afeared, and not able to find his way out of the trees nohow, ‘a cried out, ’Man-a-lost! man-a-lost!’ A owl in a tree happened to be crying ’Whoo-whoo-whoo!’ as owls do, you know, shepherd” (Gabriel nodded), ”and Joseph, all in a tremble, said, ’Joseph Poorgrass, of Weatherbury, sir!’”

“No, no, now—that’s too much!” said the timid man, becoming a man of brazen courage all of a sudden. ‘I didn’t say sir. I’ll take my oath I didn’t say ’Joseph Poorgrass o’ Weatherbury, sir.’ No, no; what’s right is right, and I never said sir to the bird, knowing very well that no man of a gentleman’s rank would be hollering there at that time o’ night. ’Joseph Poorgrass of Weatherbury,‘—that’s every word I said, and I shouldn’t ha’ said that if ’t hadn’t been for Keeper Day’s metheglin[aj](#aj_1).... There, ’twas a merciful thing it ended where it did.”

The question of which was right being tacitly waived by the company, Jan went on meditatively:—

“And he’s the fearfullest man, bain’t ye, Joseph? Ay, another time ye were lost by Lambing-Down Gate, weren’t ye, Joseph?”

“I was,” replied Poorgrass, as if there were some conditions too serious even for modesty to remember itself under, this being one.

“Yes; that were the middle of the night, too. The gate would not open, try how he would, and knowing there was the Devil’s hand in it, he kneeled down.”

“Ay,” said Joseph, acquiring confidence from the warmth of the fire, the cider, and a perception of the narrative capabilities of the experience alluded to. “My heart died within me, that time; but I kneeled down and said the Lord’s Prayer, and then the Belief†right through, and then the Ten Commandments, in earnest prayer. But no, the gate wouldn’t open; and then I went on with Dearly Beloved Brethren, and, thinks I, this makes four, and ’tis all I know out of book, and if this don’t do it nothing will, and I’m a lost man. Well, when I got to Saying After Me,‡ I rose from my knees and found the gate would open—yes, neighbours, the gate opened the same as ever.”

A meditation on the obvious inference was indulged in by all, and during its continuance each directed his vision into the ashpit, which glowed like a desert in the tropics under a vertical sun, shaping their eyes long and liny, partly because of the light, partly from the depth of the subject discussed.

Gabriel broke the silence. “What sort of a place is this to live at, and what sort of a mis’ess is she to work under?” Gabriel’s bosom thrilled gently as he thus slipped under the notice of the assembly the innermost subject of his heart.

“We d’ know little of her—nothing. She only showed herself a few days ago. Her uncle was took bad, and the doctor was called with his world-wide skill; but he couldn’t save the man. As I take it, she’s going to keep on the farm.”

“That’s about the shape o‘t, ’a b’lieve,” said Jan Coggan. “Ay, ’tis a very good family. I’d as soon be under ’em as under one here and there. Her uncle was a very fair sort of man. Did ye know en, shepherd—a bachelor-man?”

“Not at all.”

“I used to go to his house a-courting my first wife, Charlotte, who was his dairymaid. Well, a very good-hearted man were Farmer Everdene, and I being a respectable young fellow was allowed to call and see her and drink as much ale as I liked, but not to carry away any—outside my skin I mane, of course.”

“Ay, ay, Jan Coggan; we know yer maning.”

“And so you see ’twas beautiful ale, and I wished to value his kindness as much as I could, and not to be so ill-mannered as to drink only a thimbleful, which would have been insulting the man’s generosity—”

“True, Master Coggan, ’twould so,” corroborated Mark Clark.

“—And so I used to eat a lot of salt fish afore going, and then by the time I got there I were as dry as a lime-basket—so thorough dry that that ale would slip down—ah, ’twould slip down sweet! Happy times! heavenly times! Such lovely drunks as I used to have at that house! You can mind, Jacob? You used to go wi’ me sometimes.”

“I can—I can,” said Jacob. “That one, too, that we had at Buck’s Head on a White Monday[ak](#ak_1) was a pretty tipple.”

“‘Twas. But for a wet[al](#al_1) of the better class, that brought you no nearer to the horned man than you were afore you begun, there was none like those in Farmer Everdene’s kitchen. Not a single damn allowed; no, not a bare poor one, even at the most cheerful moment when all were blindest, though the good old word of sin thrown in here and there at such times is a great relief to a merry soul.”

“True,” said the maltster. “Nater requires her swearing at the regular times, or she’s not herself; and unholy exclamations is a necessity of life.”

“But Charlotte,” continued Coggan—“not a word of the sort would Charlotte allow, nor the smallest item of taking in vain.... Ay, poor Charlotte, I wonder if she had the good fortune to get into Heaven when ‘a died! But ’a was never much in luck’s way, and perhaps ’a went downwards after all, poor soul.”

“And did any of you know Miss Everdene’s father and mother?” inquired the shepherd, who found some difficulty in keeping the conversation in the desired channel.

“I knew them a little,” said Jacob Smallbury; “but they were townsfolk, and didn’t live here. They’ve been dead for years. Father, what sort of people were mis’ess’ father and mother?”

“Well,” said the maltster, “he wasn’t much to look at; but she was a lovely woman. He was fond enough of her as his sweetheart.”

“Used to kiss her scores and long-hundreds† o’ times, so’twas said,” observed Coggan.

“He was very proud of her, too, when they were married, as I’ve been told,” said the maltster.

“Ay,” said Coggan. “He admired her so much that he used to light the candle three times a night to look at her.”

“Boundless love; I shouldn’t have supposed it in the universe!” murmured Joseph Poorgrass, who habitually spoke on a large scale in his moral reflections.

“Well, to be sure,” said Gabriel.

“Oh, ’tis true enough. I knowed the man and woman both well. Levi Everdene—that was the man’s name, sure. ‘Man,’ saith I in my hurry, but he were of a higher circle of life than that—’a was a gentleman-tailor really, worth scores of pounds. And he became a very celebrated bankrupt two or three times.”

“Oh, I thought he was quite a common man!” said Joseph.

“0 no, no! That man failed for heaps of money; hundreds in gold and silver.”

The maltster being rather short of breath, Mr. Coggan, after absently scrutinizing a coal which had fallen among the ashes, took up the narrative, with a private twirl of his eye:—

“Well, now, you’d hardly believe it, but that man—our Miss Everdene’s father—was one of the ficklest husbands alive, after a while. Understand, ‘a didn’t want to be fickle, but he couldn’t help it. The poor feller were faithful and true enough to her in his wish, but his heart would rove, do what he would. He spoke to me in real tribulation about it once. ‘Coggan,’ he said, ‘I could never wish for a handsomer woman than I’ve got, but feeling she’s ticketed as my lawful wife, I can’t help my wicked heart wandering, do what I will.’ But at last I believe he cured it by making her take off her wedding-ring and calling her by her maiden name as they sat together after the shop was shut, and so ’a would get to fancy she was only his sweetheart, and not married to him at all. And as soon as he could thoroughly fancy he was doing wrong and committing the seventh,[am](#am_1) ’a got to like her as well as ever, and they lived on a perfect picture of mutel love.”

“Well, ’twas a most ungodly remedy,” murmured Joseph Poorgrass; “but we ought to feel deep cheerfulness that a happy Providence kept it from being any worse. You see, he might have gone the bad road and given his eyes to unlawfulness entirely—yes, gross unlawfulness, so to say it.”

“You see,” said Billy Smallbury, “the man’s will was to do right, sure enough, but his heart didn’t chime in.”

“He got so much better that he was quite godly in his later years, wasn’t he, Jan?” said Joseph Poorgrass. “He got himself confirmed over again in a more serious way, and took to saying ‘Amen’ almost as loud as the clerk,[an](#an_1) and he liked to copy comforting verses from the tombstones. He used, too, to hold the money-plate at Let Your Light so Shine, and stand godfather to poor little come-by-chance children:† and he kept a missionary box upon his table to nab folks unawares when they called; yes, and he would box the charity-boys’ ears, if they laughed in church, till they could hardly stand upright, and do other deeds of piety natural to the saintly inclined.”

“Ay, at that time he thought of nothing but high things,” added Billy Smallbury. “One day Parson Thirdly met him and said, ‘Good-morning, Mister Everdene; ’tis a fine day!’ ‘Amen,’ said Everdene, quite absent-like, thinking only of religion when he seed a parson. Yes, he was a very Christian man.”

“Their daughter was not at all a pretty chiel at that time,” said Henery Fray. “Never should have thought she’d have growed up such a handsome body as she is.”

“’Tis to be hoped her temper is as good as her face.”

“Well, yes; but the baily will have most to do with the business and ourselves. Ah!” Henery gazed into the ashpit, and smiled volumes of ironical knowledge.

“A queer Christian, like the Devil’s head in a cowl,‡ as the saying is,” volunteered Mark Clark.

“He is,” said Henery, implying that irony must cease at a certain point. “Between we two, man and man, I believe that man would as soon tell a lie Sundays as working-days—that I do so.”

“Good faith, you do talk!” said Gabriel.

“True enough,” said the man of bitter moods, looking round upon the company with the antithetic laughter that comes from a keener appreciation of the miseries of life than ordinary men are capable of. “Ah, there’s people of one sort, and people of another, but that man—bless your souls!”

Gabriel thought fit to change the subject. “You must be a very aged man, malter, to have sons growed up so old and ancient,” he remarked.

“Father’s so old that ‘a can’t mind his age, can ye, father?” interposed Jacob. “And he’s growed terrible crooked, too, lately,” Jacob continued, surveying his father’s figure, which was rather more bowed than his own. “Really, one may say that father there is three-double.” [ao](#ao_1)

“Crooked folk will last a long while,” said the maltster, grimly, and not in the best humour.

“Shepherd would like to hear the pedigree of yer life, father—wouldn’t ye, shepherd?”

“Ay, that I should,” said Gabriel, with the heartiness of a man who had longed to hear it for several months. “What may your age be, malter?”

The maltster cleared his throat in an exaggerated form for emphasis, and elongating his gaze to the remotest point of the ashpit, said, in the slow speech justifiable when the importance of a subject is so generally felt that any mannerism must be tolerated in getting at it, “Well, I don’t mind the year I were born in, but perhaps I can reckon up the places I’ve lived at, and so get it that way. I bode at Upper Longpuddle across there” (nodding to the north) “till I were eleven. I bode seven at Kingsbere” (nodding to the east) “where I took to malting. I went there-from to Norcombe, and malted there two-and-twenty years, and two-and-twenty years I was there turnip-hoeing and harvesting. Ah, I knowed that old place, Norcombe, years afore you were thought of, Master Oak” (Oak smiled sincere belief in the fact). “Then I malted at Durnover four year, and four year turnip-hoeing; and I was fourteen times eleven months at Millpond St. Jude’s” (nodding north-west-by-north). “Old Twills wouldn’t hire me for more than eleven months at a time, to keep me from being chargeable to the parish if so be I was disabled. Then I was three year at Mellstock, and I’ve been here one-and-thirty year come Candlemas.[ap](#ap_1) How much is that?”

“Hundred and seventeen,” chuckled another old gentleman, given to mental arithmetic and little conversation, who had hitherto sat unobserved in a corner.

“Well, then, that’s my age,” said the maltster emphatically.

“0 no, father!” said Jacob. “Your turnip-hoeing were in the summer and your malting in the winter of the same years, and ye don’t ought to count both halves, father.”

“Chok’ it all! I lived through the summers, didn’t I? That’s my question. I suppose ye’ll say next I be no age at all to speak of?”

“Sure we shan’t,” said Gabriel soothingly.

“Ye be a very old aged person, malter,” attested Jan Coggan, also soothingly. “We all know that, and ye must have a wonderful talented constitution to be able to live so long, mustn’t he, neighbours?”

“True, true; ye must, malter, wonderful;” said the meeting unanimously.

The maltster, being now pacified, was even generous enough to voluntarily disparage in a slight degree the virtue of having lived a great many years, by mentioning that the cup they were drinking out of was three years older than he.

While the cup was being examined, the end of Gabriel Oak’s flute became visible over his smock-frock pocket, and Henery Fray exclaimed, “Surely, shepherd, I seed you blowing into a great flute by now at Casterbridge?”

“You did,” said Gabriel, blushing faintly. “I’ve been in great trouble, neighbours, and was driven to it. I used not to be so poor as I be now.”

“Never mind, heart!” said Mark Clark. “You should take it careless-like, shepherd, and your time will come. But we could thank ye for a tune, if ye bain’t too tired?”

“Neither drum nor trumpet have I heard since Christmas,” said Jan Coggan. “Come, raise a tune, Master Oak!”

“That I will,” said Gabriel, pulling out his flute and putting it together. “A poor tool, neighbours; but such as I can do ye shall have and welcome.”

Oak then struck up “Jockey to the Fair,” and played that sparkling melody three times through, accenting the notes in the third round in a most artistic and lively manner by bending his body in small jerks and tapping with his foot to beat time.

“He can blow the flute very well—that ’a can,” said a young married man, who having no individuality worth mentioning was known as “Susan Tall’s husband.” He continued, “I’d as lief as not be able to blow into a flute as well as that.”

“He’s a clever man, and ‘tis a true comfort for us to have such a shepherd,” murmured Joseph Poorgrass, in a soft cadence. “We ought to feel full o’ thanksgiving that he’s not a player of ba’dy songs instead of these merry tunes; for ’twould have been just as easy for God to have made the shepherd a loose low man—a man of iniquity, so to speak it—as what he is. Yes, for our wives’ and daughters’ sakes we should feel real thanksgiving.”

“True, true,—real thanksgiving!” dashed in Mark Clark conclusively, not feeling it to be of any consequence to his opinion that he had only heard about a word and three-quarters of what Joseph had said.

“Yes,” added Joseph, beginning to feel like a man in the Bible; “for evil do thrive so in these times that ye may be as much deceived in the clanest shaved and whitest shirted man as in the raggedest tramp upon the turnpike, if I may term it so.”

“Ay, I can mind yer face now, shepherd,” said Henery Fray, criticizing Gabriel with misty eyes as he entered upon his second tune. “Yes—now I see ‘ee blowing into the flute I know ’ee to be the same man I see play at Casterbridge, for yer mouth were scrimped up and yer eyes a-staring out like a strangled man’s—just as they be now.”

“’Tis a pity that playing the flute should make a man look such a scarecrow,” observed Mr. Mark Clark, with additional criticism of Gabriel’s countenance, the latter person jerking out, with the ghastly grimace required by the instrument, the chorus of “Dame Durden”[aq](#aq_1):—

‘Twas Moll’ and Bet’, and Doll’ and Kate’,

And Dor‘-othy Drag’-gle Tail’.

“I hope you don’t mind that young man’s bad manners in naming your features?” whispered Joseph to Gabriel.

“Not at all,” said Mr. Oak.

“For by nature ye be a very handsome man, shepherd,” continued Joseph Poorgrass with winning suavity.

“Ay, that ye be, shepherd,” said the company.

“Thank you very much,” said Oak, in the modest tone good manners demanded, thinking, however, that he would never let Bathsheba see him playing the flute; in this resolve showing a discretion equal to that related of its sagacious inventress, the divine Minerva[ar](#ar_1) herself.

“Ah, when I and my wife were married at Norcombe Church,” said the old maltster, not pleased at finding himself left out of the subject, “we were called the handsomest couple in the neighbourhood—everybody said so.”

“Danged if ye bain’t altered now, malter,” said a voice with the vigour natural to the enunciation of a remarkably evident truism. It came from the old man in the background, whose offensiveness and spiteful ways were barely atoned for by the occasional chuckle he contributed to general laughs.

“0 no, no,” said Gabriel.

“Don’t ye play no more, shepherd,” said Susan Tall’s husband, the young married man who had spoken once before. “I must be moving, and when there’s tunes going on I seem as if hung in wires. If I thought after I’d left that music was still playing, and I not there, I should be quite melancholy-like.”

“What’s yer hurry then, Laban?” inquired Coggan. “You used to bide as late as the latest.”

“Well, ye see, neighbours, I was lately married to a woman, and she’s my vocation now, and so ye see—” The young man halted lamely.

“New lords new laws, as the saying is, I suppose,” remarked Coggan.

“Ay, ‘a b’lieve—ha, ha!” said Susan Tall’s husband, in a tone intended to imply his habitual reception of jokes without minding them at all. The young man then wished them good-night and withdrew.

Henery Fray was the first to follow. Then Gabriel arose and went off with Jan Coggan, who had offered him a lodging. A few minutes later, when the remaining ones were on their legs and about to depart, Fray came back again in a hurry. Flourishing his finger ominously he threw a gaze teeming with tidings just where his eye alighted by accident, which happened to be in Joseph Poorgrass’s face.

“0—what’s the matter, what’s the matter, Henery?” said Joseph, starting back.

“What’s a-brewing, Henery?” asked Jacob and Mark Clark.

“Baily Pennyways—Baily Pennyways—I said so; yes, I said so!”

“What, found out stealing anything?”

“Stealing it is. The news is, that after Miss Everdene got home she went out again to see all was safe, as she usually do, and coming in found Baily Pennyways creeping down the granary steps with half a bushel of barley. She fleed[as](#as_1) at him like a cat—never such a tomboy as she is—of course I speak with closed doors?”†

“You do—you do, Henery.”

“She fleed at him, and, to cut a long story short, he owned to having carried off five sack altogether, upon her promising not to persecute him. Well, he’s turned out neck and crop, and my question is, who’s going to be baily now?”

The question was such a profound one that Henery was obliged to drink there and then from the large cup till the bottom was distinctly visible inside. Before he had replaced it on the table, in came the young man, Susan Tall’s husband, in a still greater hurry.

“Have ye heard the news that’s all over parish?”

“About Baily Pennyways?”

“But besides that?”

“No—not a morsel of it!” they replied, looking into the very midst of Laban Tall as if to meet his words half-way down his throat.

“What a night of horrors!” murmured Joseph Poorgrass, waving his hands spasmodically. “I’ve had the news-bell ringing in my left ear quite bad enough for a murder, and I’ve seen a magpie all alone!”[at](#at_1)

“Fanny Robin—Miss Everdene’s youngest servant—can’t be found. They’ve been wanting to lock up the door these two hours, but she isn’t come in. And they don’t know what to do about going to bed for fear of locking her out. They wouldn’t be so concerned if she hadn’t been noticed in such low spirits these last few days, and Maryann d’ think the beginning of a crowner’s† inquest has happened to the poor girl.”

“O—‘tis burned—’tis burned!” came from Joseph Poorgrass’s dry lips.

“No—’tis drowned!” said Tall.

“Or ’tis her father’s razor!” suggested Billy Smallbury with a vivid sense of detail.

“Well—Miss Everdene wants to speak to one or two of us before we go to bed. What with this trouble about the baily, and now about the girl, mis’ess is almost wild.”

They all hastened up the lane to the farmhouse, excepting the old maltster, whom neither news, fire, rain, nor thunder could draw from his hole. There, as the other’s footsteps died away, he sat down again, and continued gazing as usual into the furnace with his red, bleared eyes.

From the bedroom window above their heads Bathsheba’s head and shoulders, robed in mystic white, were dimly seen extended into the air.

“Are any of my men among you?” she said anxiously.

“Yes, ma’am, several,” said Susan Tall’s husband.

“To-morrow morning I wish two or three of you to make inquiries in the villages round if they have seen such a person as Fanny Robin. Do it quietly; there is no reason for alarm as yet. She must have left whilst we were all at the fire.”

“I beg yer pardon, but had she any young man courting her in the parish, ma’am?” asked Jacob Smallbury.

“I don’t know,” said Bathsheba.

“I’ve never heard of any such thing, ma’am,” said two or three.

“It is hardly likely, either,” continued Bathsheba. “For any lover of hers might have come to the house if he had been a respectable lad. The most mysterious matter connected with her absence—indeed, the only thing which gives me serious alarm—is that she was seen to go out of the house by Maryann with only her indoor working gown on—not even a bonnet.”

“And you mean, ma‘am, excusing my words, that a young woman would hardly go to see her young man without dressing up,” said Jacob, turning his mental vision upon past experiences. “That’s true—she would not, ma’am.”

“She had, I think, a bundle, though I couldn’t see very well,” said a female voice from another window, which seemed that of Maryann. “But she had no young man about here. Hers lives in Casterbridge, and I believe he’s a soldier.”

“Do you know his name?” Bathsheba said.

“No, mistress; she was very close about it.”

“Perhaps I might be able to find out if I went to Casterbridge barracks,” said William Smallbury.

“Very well; if she doesn’t return to-morrow, mind you go there and try to discover which man it is, and see him. I feel more responsible than I should if she had had any friends or relations alive. I do hope she has come to no harm through a man of that kind.... And then there’s this disgraceful affair of the bailiff—but I can’t speak of him now.”

Bathsheba had so many reasons for uneasiness that it seemed she did not think it worth while to dwell upon any particular one. “Do as I told you, then,” she said in conclusion, closing the casement.

“Ay, ay, mistress; we will,” they replied, and moved away.

That night at Coggan’s Gabriel Oak, beneath the screen of closed eyelids, was busy with fancies, and full of movement, like a river flowing rapidly under its ice. Night had always been the time at which he saw Bathsheba most vividly, and through the slow hours of shadow he tenderly regarded her image now. It is rarely that the pleasures of the imagination will compensate for the pain of sleeplessness, but they possibly did with Oak to-night, for the delight of merely seeing her effaced for the time his perception of the great difference between seeing and possessing.

He also thought of plans for fetching his few utensils and books from Norcombe. The Young Man’s Best Companion, The Farrier’s Sure Guide, The Veterinary Surgeon, Paradise Lost, The Pilgrim’s Progress, Robinson Crusoe, Ash’s Dictionary, and Walkingame’s Arithmetic,[5](#5_1) constituted his library; and though a limited series, it was one from which he had acquired more sound information by diligent perusal than many a man of opportunities has done from a furlong of laden shelves.

CHAPTER IX

The Homestead-A Visitor—Half-Confidences

BY DAYLIGHT, THE BOWER of Oak’s new-found mistress, Bathsheba Everdene, presented itself as a hoary building, of the early stage of Classic Renaissance[au](#au_1) as regards its architecture, and of a proportion which told at a glance that, as is so frequently the case, it had once been the manorial hall upon a small estate around it, now altogether effaced as a distinct property, and merged in the vast tract of a non-resident landlord, which comprised several such modest demesnes.

Fluted pilasters,† worked from the solid stone, decorated its front, and above the roof the chimneys were panelled or columnar, some coped gables with finials‡ and like features still retaining traces of their Gothic extraction. Soft brown mosses, like faded velveteen, formed cushions upon the stone tiling, and tufts of the houseleek or sengreen§ sprouted from the eaves of the low surrounding buildings. A gravel walk leading from the door to the road in front was encrusted at the sides with more moss—here it was a silver-green variety, the nut-brown of the gravel being visible to the width of only a foot or two in the centre. This circumstance, and the generally sleepy air of the whole prospect here, together with the animated and contrasting state of the reverse façade. suggested to the imagination that on the adaptation of the building for farming purposes the vital principle of the house had turned round inside its body to face the other way. Reversals of this kind, strange deformities, tremendous paralyses, are often seen to be inflicted by trade upon edifices—either individual or in the aggregate as streets and towns—which were originally planned for pleasure alone.

Lively voices were heard this morning in the upper rooms, the main staircase to which was of hard oak, the balusters, heavy as bed-posts, being turned and moulded in the quaint fashion of their century, the handrail as stout as a parapet-top, and the stairs themselves continually twisting round like a person trying to look over his shoulder. Going up, the floors above were found to have a very irregular surface, rising to ridges, sinking into valleys; and being just then uncarpeted, the face of the boards was seen to be eaten into innumerable vermiculations. [av](#av_1) Every window replied by a clang to the opening and shutting of every door, a tremble followed every bustling movement, and a creak accompanied a walker about the house, like a spirit, wherever he went.

In the room from which the conversation proceeded Bathsheba and her servant-companion, Liddy Smallbury, were to be discovered sitting upon the floor, and sorting a complication of papers, books, bottles, and rubbish spread out thereon—remnants from the household stores of the late occupier. Liddy, the maltster’s great-granddaughter, was about Bathsheba’s equal in age, and her face was a prominent advertisement of the light-hearted English country girl. The beauty her features might have lacked in form was amply made up for by perfection of hue, which at this wintertime was the softened ruddiness on a surface of high rotundity that we meet with in a Terburg or a Gerard Douw;† and, like the presentations of those great colourists, it was a face which kept well back from the boundary between comeliness and the ideal. Though elastic in nature she was less daring than Bathsheba, and occasionally showed some earnestness, which consisted half of genuine feeling, and half of mannerliness superadded by way of duty.

Through a partly-opened door the noise of a scrubbing-brush led up to the charwoman, Maryann Money, a person who for a face had a circular disc, furrowed less by age than by long gazes of perplexity at distant objects. To think of her was to get good-humoured; to speak of her was to raise the image of a dried Normandy pippin.[aw](#aw_1)

“Stop your scrubbing a moment,” said Bathsheba through the door to her. “I hear something.”

Maryann suspended the brush.

The tramp of a horse was apparent, approaching the front of the building. The paces slackened, turned in at the wicket, and, what was most unusual, came up the mossy path close to the door. The door was tapped with the end of a crop or stick.

“What impertinence!” said Liddy, in a low voice. “To ride up the footpath like that! Why didn’t he stop at the gate? Lord! ’tis a gentleman! I see the top of his hat.”

“Be quiet!” said Bathsheba.

The further expression of Liddy’s concern was continued by aspect instead of narrative.

“Why doesn’t Mrs. Coggan go to the door?” Bathsheba continued.

Rat-tat-tat-tat resounded more decisively from Bathsheba’s oak.

“Maryann, you go!” said she, fluttering under the onset of a crowd of romantic possibilities.

“O ma’am—see, here’s a mess!”

The argument was unanswerable after a glance at Maryann.

“Liddy—you must,” said Bathsheba.

Liddy held up her hands and arms, coated with dust from the rubbish they were sorting, and looked imploringly at her mistress.

“There—Mrs. Coggan is going!” said Bathsheba, exhaling her relief in the form of a long breath which had lain in her bosom a minute or more.

The door opened, and a deep voice said—

“Is Miss Everdene at home?”

“I’ll see, sir,” said Mrs. Coggan, and in a minute appeared in the room.

“Dear, what a thirtover† place this world is!” continued Mrs. Coggan (a wholesome-looking lady who had a voice for each class of remark according to the emotion involved; who could toss a pancake or twirl a mop with the accuracy of pure mathematics, and who at this moment showed hands shaggy with fragments of dough and arms encrusted with flour). “I am never up to my elbows, Miss, in making a pudding but one of two things do happen—either my nose must needs begin tickling, and I can’t live without scratching it, or somebody knocks at the door. Here’s Mr. Boldwood wanting to see you, Miss Everdene.”

A woman’s dress being a part of her countenance, and any disorder in the one being of the same nature with a malformation or wound in the other, Bathsheba said at once—

“I can’t see him in this state. Whatever shall I do?”

Not-at-homes were hardly naturalized in Weatherbury farm-houses, so Liddy suggested—“Say you’re a fright with dust, and can’t come down.”

“Yes—that sounds very well,” said Mrs. Coggan critically.

“Say I can’t see him—that will do.”

Mrs. Coggan went downstairs, and returned the answer as requested, adding, however, on her own responsibility, “Miss is dusting bottles, sir, and is quite a object—that’s why ’tis.”

“Oh, very well,” said the deep voice indifferently. “All I wanted to ask was, if anything had been heard of Fanny Robin?”

“Nothing, sir—but we may know to-night. William Smallbury is gone to Casterbridge, where her young man lives, as is supposed, and the other men be inquiring about everywhere.”

The horse’s tramp then recommenced and retreated, and the door closed.

“Who is Mr. Boldwood?” said Bathsheba.

“A gentleman-farmer at Little Weatherbury.”

“Married?”

“No, miss.”

“How old is he?”

“Forty, I should say—very handsome—rather stern-looking—and rich.”

“What a bother this dusting is! I am always in some unfortunate plight or other,” Bathsheba said complainingly. “Why should he inquire about Fanny?”

“Oh, because, as she had no friends in her childhood, he took her and put her to school, and got her her place here under your uncle. He’s a very kind man that way, but Lord—there!”

“What?”

“Never was such a hopeless man for a woman! He’s been courted by sixes and sevens—all the girls, gentle and simple, for miles round, have tried him. Jane Perkins worked at him for two months like a slave, and the two Miss Taylors spent a year upon him, and he cost Farmer Ives’s daughter nights of tears and twenty pounds’ worth of new clothes; but Lord—the money might as well have been thrown out of the window.”

A little boy came up at this moment and looked in upon them. This child was one of the Coggans, who, with the Smallburys, were as common among the families of this district as the Avons and Derwents among our rivers. He always had a loosened tooth or a cut finger to show to particular friends, which he did with an air of being thereby elevated above the common herd of afflictionless humanity—to which exhibition people were expected to say “Poor child!” with a dash of congratulation as well as pity.

“I’ve got a pen-nee! said Master Coggan in a scanning measure.

“Well—who gave it you, Teddy?” said Liddy.

“Mis-terr Bold-wood! He gave it to me for opening the gate.”

“What did he say?”

“He said, ‘Where are you going, my little man?’ and I said, ‘To Miss Everdene’s, please’; and he said, ’She is a staid[ax](#ax_1) woman, isn’t she, my little man?’ and I said, ’Yes.’”

“You naughty child! What did you say that for?”

“’Cause he gave me the penny!”

“What a pucker† everything is in!” said Bathsheba discontentedly, when the child had gone. “Get away, Maryann, or go on with your scrubbing, or do something! You ought to be married by this time, and not here troubling me!”

“Ay, mistress—so I did. But what between the poor men I won’t have, and the rich men who won’t have me, I stand as a pelican in the wilderness!”‡

“Did anybody ever want to marry you, miss?” Liddy ventured to ask when they were again alone. “Lots of ’em, I daresay?”

Bathsheba paused, as if about to refuse a reply, but the temptation to say yes, since it really was in her power, was irresistible by aspiring virginity, in spite of her spleen at having been published as old.

“A man wanted to once,” she said, in a highly experienced tone, and the image of Gabriel Oak, as the farmer, rose before her.

“How nice it must seem!” said Liddy, with the fixed features of mental realization. “And you wouldn’t have him?”

“He wasn’t quite good enough for me.”

“How sweet to be able to disdain, when most of us are glad to say, ‘Thank you!’ I seem I hear it. ‘No, sir—I’m your better,’ or ‘Kiss my foot, sir; my face is for mouths of consequence.’ And did you love him, miss?”

“Oh, no. But I rather liked him.”

“Do you now?”

“Of course not—what footsteps are those I hear?”

Liddy looked from a back window into the courtyard behind, which was now getting low-toned and dim with the earliest films of night. A crooked file of men was approaching the back door. The whole string of trailing individuals advanced in the completest balance of intention, like the remarkable creatures known as Chain Salpæ,[ay](#ay_1) which, distinctly organized in other respects, have one will common to a whole family. Some were, as usual, in snow-white smock-frocks of Russia duck, and some in whitey-brown ones of drabbet†—marked on the wrists, breasts, backs, and sleeves with honeycomb-work. Two or three women in pattens‡ brought up the rear.

“The Philistines§ be upon us,” said Liddy, making her nose white against the glass.

“Oh, very well. Maryann, go down and keep them in the kitchen till I am dressed, and then show them in to me in the hall.”

CHAPTER X

Mistress and Men

HALF-AN-HOUR LATER BATHSHEBA, IN finished dress, and followed by Liddy, entered the upper end of the old hall to find that her men had all deposited themselves on a long form and a settle at the lower extremity. She sat down at a table and opened the time-book, pen in her hand, with a canvas money-bag beside her. From this she poured a small heap of coin. Liddy chose a position at her elbow and began to sew, sometimes pausing and looking round, or, with the air of a privileged person, taking up one of the half-sovereigns lying before her, and surveying it merely as a work of art, while strictly preventing her countenance from expressing any wish to possess it as money.

“Now, before I begin, men,” said Bathsheba, “I have two matters to speak of. The first is that the bailiff is dismissed for thieving, and that I have formed a resolution to have no bailiff at all, but to manage everything with my own head and hands.”

The men breathed an audible breath of amazement.

“The next matter is, have you heard anything of Fanny?”

“Nothing, ma’am.”

“Have you done anything?”

“I met Farmer Boldwood,” said Jacob Smallbury, “and I went with him and two of his men, and dragged Newmill Pond, but we found nothing.”

“And the new shepherd have been to Buck’s Head, by Yalbury, thinking she had gone there, but nobody had seed her,” said Laban Tall.

“Hasn’t William Smallbury been to Casterbridge?”

“Yes, ma’am, but he’s not yet come home. He promised to be back by six.”

“It wants a quarter to six at present,” said Bathsheba, looking at her watch. “I daresay he’ll be in directly. Well, now then”—she looked into the book—“Joseph Poorgrass, are you there?”

“Yes, sir—ma’am I mane,” said the person addressed. “I be the personal name of Poorgrass.”

“And what are you?”

“Nothing in my own eye. In the eye of other people—well, I don’t say it; though public thought will out.”

“What do you do on the farm?”

“I do do carting things all the year, and in seed time I shoots the rooks and sparrows, and helps at pig-killing, sir.”

“How much to you?”

“Please nine and ninepence and a good halfpenny where ‘twas a bad one, sir—ma’am I mane.”

“Quite correct. Now here are ten shillings in addition as a small present, as I am a new comer.”

Bathsheba blushed slightly at the sense of being generous in public, and Henery Fray, who had drawn up towards her chair, lifted his eyebrows and fingers to express amazement on a small scale.

“How much do I owe you—that man in the corner—what’s your name?” continued Bathsheba.

“Matthew Moon, ma’am,” said a singular framework of clothes with nothing of any consequence inside them, which advanced with the toes in no definite direction forwards, but turned in or out as they chanced to swing.

“Matthew Mark, did you say?—speak out—I shall not hurt you,” inquired the young farmer kindly.

“Matthew Moon, mem,” said Henery Fray, correctingly, from behind her chair, to which point he had edged himself.

“Matthew Moon,” murmured Bathsheba, turning her bright eyes to the book. “Ten and twopence halfpenny is the sum put down to you, I see?”

“Yes, mis*’ess,” said Matthew, as the rustle of wind among dead leaves.

“Here it is, and ten shillings. Now the next—Andrew Randle, you are a new man, I hear. How came you to leave your last farm?”

“P-p-p-p-p-pl-pl-pl-pl-1-1-1-1-ease, ma’am, p-p-p-p-pl-pl-pl-plplease, ma’ am-please’ m-please’ m—”

“ ’A’s a stammering man, mem,” said Henery Fray in an undertone, “and they turned him away because the only time he ever did speak plain he said his soul was his own, and other iniquities, to the squire. ’A can cuss, mem, as well as you or I, but ’a can’t speak a common speech to save his life.”

“Andrew Randle, here’s yours—finish thanking me in a day or two. Temperance Miller—oh, here’s another, Soberness—both women, I suppose?”

“Yes’m. Here we be, ‘a b’lieve,” was echoed in shrill unison.

“What have you been doing?”

“Tending thrashing—machine, and wimbling haybonds;[az](#az_1) and saying ‘Hoosh!’ to the cocks and hens when they go upon your seeds, and planting Early Flourballs and Thompson’s Wonderfuls with a dibble.”†

“Yes—I see. Are they satisfactory women?” she inquired softly of Henery Fray.

“0 mem—don’t ask me! Yielding women—as scarlet a pair as ever was!” groaned Henery under his breath.

“Sit down.”

“Who, mem?”

“Sit down.”

Joseph Poorgrass, in the background, twitched, and his lips became dry with fear of some terrible consequences, as he saw Bathsheba summarily speaking, and Henery slinking off to a corner.

“Now the next. Laban Tall, you’ll stay on working for me?”

“For you or anybody that pays me well, ma’am,” replied the young married man.

“True—the man must live!” said a woman in the back quarter, who had just entered with clicking pattens.

“What woman is that?” Bathsheba asked.

“I be his lawful wife!” continued the voice with greater prominence of manner and tone. This lady called herself five-and-twenty, looked thirty, passed as thirty-five, and was forty. She was a woman who never, like some newly married, showed conjugal tenderness in public, perhaps because she had none to show.

“Oh, you are,” said Bathsheba. “Well, Laban, will you stay on?”

“Yes, he’ll stay, ma’am!” said again the shrill tongue of Laban’s lawful wife.

“Well, he can speak for himself, I suppose.”

“0 Lord, not he, ma’am! A simple tool. Well enough, but a poor gawkhammer[ba](#ba_1) mortal,” the wife replied.

“Heh-heh-heh!” laughed the married man, with a hideous effort of appreciation, for he was as irrepressibly good-humoured under ghastly snubs as a parliamentary candidate on the hustings.†

The names remaining were called in the same manner.

“Now I think I have done with you,” said Bathsheba, closing the book and shaking back a stray twine of hair. “Has William Smallbury returned?”

“No, ma’am.”

“The new shepherd will want a man under him,” suggested Henery Fray, trying to make himself official again by a sideway approach towards her chair.

“Oh—he will. Who can he have?”

“Young Cain Ball is a very good lad,” Henery said, “and Shepherd Oak don’t mind his youth?” he added, turning with an apologetic smile to the shepherd, who had just appeared on the scene, and was now leaning against the doorpost with his arms folded.

“No, I don’t mind that,” said Gabriel.

“How did Cain come by such a name?” asked Bathsheba.

“Oh you see, mem, his pore mother, not being a Scripture-read woman, made a mistake at his christening, thinking ‘twas Abel killed Cain, and called en Cain, meaning Abel all the time.‡ The parson put it right, but ’twas too late, for the name could never be got rid of in the parish. ‘Tis very unfortunate for the boy.”

“It is rather unfortunate.”

“Yes. However, we soften it down as much as we can, and call him Cainy. Ah, pore widow-woman! she cried her heart out about it almost. She was brought up by a very heathen father and mother, who never sent her to church or school, and it shows how the sins of the parents are visited upon the children,[bb](#bb_1) mem.”

Mr. Fray here drew up his features to the mild degree of melancholy required when the persons involved in the given misfortune do not belong to your own family.

“Very well then, Cainy Ball to be under-shepherd. And you quite understand your duties?—you I mean, Gabriel Oak?”

“Quite well, I thank you, Miss Everdene,” said Shepherd Oak from the doorpost. “If I don’t, I’ll inquire.” Gabriel was rather staggered by the remarkable coolness of her manner. Certainly nobody without previous information would have dreamt that Oak and the handsome woman before whom he stood had ever been other than strangers. But perhaps her air was the inevitable result of the social rise which had advanced her from a cottage to a large house and fields. The case is not unexampled in high places. When, in the writings of the later poets, Jove and his family are found to have moved from their cramped quarters on the peak of Olympus† into the wide sky above it, their words show a proportionate increase of arrogance and reserve.

Footsteps were heard in the passage, combining in their character the qualities both of weight and measure, rather at the expense of velocity.

(All.) “Here’s Billy Smallbury come from Casterbridge.”

“And what’s the news?” said Bathsheba, as William, after marching to the middle of the hall, took a handkerchief from his hat and wiped his forehead from its centre to its remoter boundaries.

“I should have been sooner, miss,” he said, “if it hadn’t been for the weather.” He then stamped with each foot severely, and on looking down his boots were perceived to be clogged with snow.

“Come at last, is it?” said Henery.

“Well, what about Fanny?” said Bathsheba.

“Well, ma’am, in round numbers, she’s run away with the soldiers,” said William.

“No; not a steady girl like Fanny!”

“I’ll tell ye all particulars. When I got to Casterbridge Barracks, they said, ‘The Eleventh Dragoon Guards[bc](#bc_1) be gone away, and new troops have come.’ The Eleventh left last week for Melchester and onwards. The Route came from Government like a thief in the night,† as is his nature to, and afore the Eleventh knew it almost, they were on the march. They passed near here.”

Gabriel had listened with interest. “I saw them go,” he said.

“Yes,” continued William, “they pranced down the street playing ‘The Girl I Left Behind Me,’ so ’tis said, in glorious notes of triumph.

Every looker-on’s inside shook with the blows of the great drum to his deepest vitals, and there was not a dry eye throughout the town among the public-house people and the nameless women!“‡

“But they’re not gone to any war?”

“No, ma‘am; but they be gone to take the places of them who may, which is very close connected. And so I said to myself, Fanny’s young man was one of the regiment, and she’s gone after him. There, ma’am, that’s it in black and white.”

“Did you find out his name?”

“No; nobody knew it. I believe he was higher in rank than a private.”

Gabriel remained musing and said nothing, for he was in doubt.

“Well, we are not likely to know more to-night, at any rate,” said Bathsheba. “But one of you had better run across to Farmer Boldwood’s and tell him that much.”

She then rose; but before retiring, addressed a few words to them with a pretty dignity, to which her mourning dress added a soberness that was hardly to be found in the words themselves:

“Now mind, you have a mistress instead of a master. I don’t yet know my powers or my talents in farming; but I shall do my best, and if you serve me well, so shall I serve you. Don’t any unfair ones among you (if there are any such, but I hope not) suppose that because I’m a woman I don’t understand the difference between bad goings-on and good.”

(All.) “No’m!”

(Liddy.) “Excellent well said.”

“I shall be up before you are awake; I shall be afield before you are up; and I shall have breakfasted before you are afield. In short, I shall astonish you all.”

(All.) “Yes’m!”

“And so good-night.”

(All.) “Good-night, ma’am.”

Then this small thesmothete[bd](#bd_1) stepped from the table, and surged out of the hall, her black silk dress licking up a few straws and dragging them along with a scratching noise upon the floor. Liddy, elevating her feelings to the occasion from a sense of grandeur, floated off behind Bathsheba with a milder dignity not entirely free from travesty, and the door was closed.

CHAPTER XI

Outside the Barracks—Snow—A Meeting

FOR DREARINESS NOTHING COULD surpass a prospect in the outskirts of a certain town and military station, many miles north of Weatherbury, at a later hour on this same snowy evening—if that may be called a prospect of which the chief constituent was darkness.

It was a night when sorrow may come to the brightest without causing any great sense of incongruity: when, with impressible persons, love becomes solicitousness, hope sinks to misgiving, and faith to hope: when the exercise of memory does not stir feelings of regret at opportunities for ambition that have been passed by, and anticipation does not prompt to enterprise.

The scene was a public path, bordered on the left hand by a river, behind which rose a high wall. On the right was a tract of land, partly meadow and partly moor, reaching, at its remote verge, to a wide undulating upland.

The changes of the seasons are less obtrusive on spots of this kind than amid woodland scenery. Still, to a close observer, they are just as perceptible; the difference is that their media of manifestation are less trite and familiar than such well-known ones as the bursting of the buds or the fall of the leaf. Many are not so stealthy and gradual as we may be apt to imagine in considering the general torpidity of a moor or waste. Winter, in coming to the country hereabout, advanced in well-marked stages, wherein might have been successively observed the retreat of the snakes, the transformation of the ferns, the filling of the pools, a rising of fogs, the embrowning by frost, the collapse of the fungi, and an obliteration by snow.

This climax of the series had been reached to-night on the aforesaid moor, and for the first time in the season its irregularities were forms without features; suggestive of anything, proclaiming nothing, and without more character than that of being the limit of something else—the lowest layer of a firmament of snow. From this chaotic skyful of crowding flakes the mead and moor momentarily received additional clothing, only to appear momentarily more naked thereby. The vast arch of cloud above was strangely low, and formed as it were the roof of a large dark cavern, gradually sinking in upon its floor; for the instinctive thought was that the snow lining the heavens and that encrusting the earth would soon unite into one mass without any intervening stratum of air at all.

We turn our attention to the left-hand characteristics; which were flatness in respect of the river, verticality in respect of the wall behind it, and darkness as to both. These features made up the mass. If anything could be darker than the sky, it was the wall, and if anything could be gloomier than the wall it was the river beneath. The indistinct summit of the façade was notched and prolonged by chimneys here and there, and upon its face were faintly signified the oblong shapes of windows, though only in the upper part. Below, down to the water’s edge, the flat was unbroken by hole or projection.

An indescribable succession of dull blows, perplexing in their regularity, sent their sound with difficulty through the fluffy atmosphere. It was a neighbouring clock striking ten. The bell was in the open air, and being overlaid with several inches of muffling snow, had lost its voice for the time.

About this hour the snow abated: ten flakes fell where twenty had fallen, then one had the room of ten. Not long after a form moved by the brink of the river.

By its outline upon the colourless background a close observer might have seen that it was small. This was all that was positively discoverable, though it seemed human.

The shape went slowly along, but without much exertion, for the snow, though sudden, was not as yet more than two inches deep. At this time some words were spoken aloud:—

“One. Two. Three. Four. Five.”

Between each utterance the little shape advanced about half-a-dozen yards. It was evident now that the windows high in the wall were being counted. The word “Five” represented the fifth window from the end of the wall.

Here the spot stopped, and dwindled smaller. The figure was stooping. Then a morsel of snow flew across the river towards the fifth window. It smacked against the wall at a point several yards from its mark. The throw was the idea of a man conjoined with the execution of a woman. No man who had ever seen bird, rabbit, or squirrel in his childhood, could possibly have thrown with such utter imbecility as was shown here.

Another attempt, and another; till by degrees the wall must have become pimpled with the adhering lumps of snow. At last one fragment struck the fifth window.

The river would have been seen by day to be of that deep smooth sort which races middle and sides with the same gliding precision, any irregularities of speed being immediately corrected by a small whirlpool. Nothing was heard in reply to the signal but the gurgle and cluck of one of these invisible wheels—together with a few small sounds which a sad man would have called moans, and a happy man laughter—caused by the flapping of the waters against trifling objects in other parts of the stream.

The window was struck again in the same manner.

Then a noise was heard, apparently produced by the opening of the window. This was followed by a voice from the same quarter:

“Who’s there?”

The tones were masculine, and not those of surprise. The high wall being that of a barrack, and marriage being looked upon with disfavour in the army, assignations and communications had probably been made across the river before to-night.

“Is it Sergeant Troy?” said the blurred spot in the snow, tremulously.

This person was so much like a mere shade upon the earth, and the other speaker so much a part of the building, that one would have said the wall was holding a conversation with the snow.

“Yes,” came suspiciously from the shadow. “What girl are you?”

“0, Frank—don’t you know me?” said the spot. “Your wife, Fanny Robin.”

“Fanny!” said the wall, in utter astonishment.

“Yes,” said the girl, with a half-suppressed gasp of emotion.

There was something in the woman’s tone which is not that of the wife, and there was a manner in the man which is rarely a husband’s. The dialogue went on:

“How did you come here?”

“I asked which was your window. Forgive me!”

“I did not expect you to-night. Indeed, I did not think you would come at all. It was a wonder you found me here. I am orderly to-morrow.”

“You said I was to come.”

“Well—I said that you might.”

“Yes, I mean that I might. You are glad to see me, Frank?”

“O yes—of course.”

“Can you—come to me?”

“My dear Fan, no! The bugle has sounded, the barrack gates are closed, and I have no leave. We are all of us as good as in the county gaol till to-morrow morning.”

“Then I shan’t see you till then!” The words were in a faltering tone of disappointment.

“How did you get here from Weatherbury?”

“I walked—some part of the way—the rest by the carriers.”[be](#be_1)

“I am surprised.”

“Yes—so am I. And Frank, when will it be?”

“What?”

“That you promised.”

“I don’t quite recollect.”

“0 you do! Don’t speak like that. It weighs me to the earth. It makes me say what ought to be said first by you.”

“Never mind—say it.”

“0, must I?—it is, when shall we be married, Frank?”

“Oh, I see. Well—you have to get proper clothes.”

“I have money. Will it be by banns or license?”†

“Banns, I should think.”

“And we live in two parishes.”

“Do we? What then?”

“My lodgings are in St. Mary’s, and this is not. So they will have to be published in both.”

“Is that the law?”

“Yes. 0 Frank—you think me forward, I am afraid! Don’t, dear Frank—will you—for I love you so. And you said lots of times you would marry me, and—and—I—I—I—”

“Don’t cry, now! It is foolish. If I said so, of course I will.”

“And shall I put up the banns in my parish, and will you in yours?”

“Yes.”

“To-morrow?”

“Not to-morrow We’ll settle in a few days.”

“You have the permission of the officers?”

“No—not yet.”

“0—how is it? You said you almost had before you left Casterbridge.”

“The fact is, I forgot to ask. Your coming like this is so sudden and unexpected.”

“Yes—yes—it is. It was wrong of me to worry you. I’ll go away now. Will you come and see me to-morrow, at Mrs. Twills’s, in North Street? I don’t like to come to the Barracks. There are bad women about, and they think me one.”

“Quite so. I’ll come to you, my dear. Good-night.”

“Good-night, Frank—good-night!”

And the noise was again heard of a window closing. The little spot moved away. When she passed the corner a subdued exclamation was heard inside the wall.

“Ho—ho—Sergeant—ho—ho!” An expostulation followed, but it was indistinct; and it became lost amid a low peal of laughter, which was hardly distinguishable from the gurgle of the tiny whirlpools outside.

CHAPTER XII

Farmers—A Rule—An Exception

THE FIRST PUBLIC EVIDENCE Of Bathsheba’s decision to be a farmer in her own person and by proxy no more was her appearance the following market-day in the cornmarket at Casterbridge.

The low though extensive hall, supported by beams and pillars, and latterly dignified by the name of Corn Exchange,[bf](#bf_1) was thronged with hot men who talked among each other in twos and threes, the speaker of the minute looking sideways into his auditor’s face and concentrating his argument by a contraction of one eyelid during delivery. The greater number carried in their hands ground-ash saplings, using them partly as walking-sticks and partly for poking up pigs, sheep, neighbours with their backs turned, and restful things in general, which seemed to require such treatment in the course of their peregrinations. During conversations each subjected his sapling to great varieties of usage—bending it round his back, forming an arch of it between his two hands, overweighting it on the ground till it reached nearly a semicircle; or perhaps it was hastily tucked under the arm whilst the sample-bag was pulled forth and a handful of corn poured into the palm, which, after criticism, was flung upon the floor, an issue of events perfectly well known to half-a-dozen acute town-bred fowls which had as usual crept into the building unobserved, and waited the fulfilment of their anticipations with a high-stretched neck and oblique eye.

Among these heavy yeomen a feminine figure glided, the single one of her sex that the room contained. She was prettily and even daintily dressed. She moved between them as a chaise between carts, was heard after them as a romance after sermons, was felt among them like a breeze among furnaces. It had required a little determination—far more than she had at first imagined—to take up a position here, for at her first entry the lumbering dialogues had ceased, nearly every face had been turned towards her, and those that were already turned rigidly fixed there.

Two or three only of the farmers were personally known to Bathsheba, and to these she had made her way. But if she was to be the practical woman she had intended to show herself, business must be carried on, introductions or none, and she ultimately acquired confidence enough to speak and reply boldly to men merely known to her by heresay. Bathsheba too had her sample-bags, and by degrees adopted the professional pour into the hand—holding up the grains in her narrow palm for inspection, in perfect Casterbridge manner.

Something in the exact arch of her upper unbroken row of teeth, and in the keenly pointed corners of her red mouth when, with parted lips, she somewhat defiantly turned up her face to argue a point with a tall man, suggested that there was potentiality enough in that lithe slip of humanity for alarming exploits of sex, and daring enough to carry them out. But her eyes had a softness—invariably a softness—which, had they not been dark, would have seemed mistiness; as they were, it lowered an expression that might have been piercing to simple clearness.

Strange to say of a woman in full bloom and vigour, she always allowed her interlocutors to finish their statements before rejoining with hers. In arguing on prices she held to her own firmly, as was natural in a dealer, and reduced theirs persistently, as was inevitable in a woman. But there was an elasticity in her firmness which removed it from obstinacy, as there was a naïveté in her cheapening which saved it from meanness.

Those of the farmers with whom she had no dealings (by far the greater part) were continually asking each other, “Who is she?” The reply would be—

“Farmer Everdene’s niece; took on Weatherbury Upper Farm; turned away the baily, and swears she’ll do everything herself.”

The other man would then shake his head.

“Yes, ‘tis a pity she’s so headstrong,” the first would say. “But we ought to be proud of her here—she lightens up the old place. ’Tis such a shapely maid, however, that she’ll soon get picked up.”

It would be ungallant to suggest that the novelty of her engagement in such an occupation had almost as much to do with the magnetism as had the beauty of her face and movements. However, the interest was general, and this Saturday’s debut in the forum, whatever it may have been to Bathsheba as the buying and selling farmer, was unquestionably a triumph to her as the maiden. Indeed, the sensation was so pronounced that her instinct on two or three occasions was to merely walk as a queen among these gods of the fallow, like a little sister of a little Jove, and to neglect closing prices altogether.

The numerous evidences of her power to attract were only thrown into greater relief by a marked exception. Women seem to have eyes in their ribbons for such matters as these. Bathsheba, without looking within a right angle of him, was conscious of a black sheep among the flock.

It perplexed her first. If there had been a respectable minority on either side, the case would have been most natural. If nobody had regarded her, she would have taken the matter indifferently—such cases had occurred. If everybody, this man included, she would have taken it as a matter of course—people had done so before. But the smallness of the exception made the mystery.

She soon knew thus much of the recusant’s[bg](#bg_1) appearance. He was a gentlemanly man, with full and distinctly outlined Roman features, the prominences of which glowed in the sun with a bronze-like richness of tone. He was erect in attitude, and quiet in demeanour. One characteristic pre-eminently marked him—dignity.

Apparently he had some time ago reached that entrance to middle age at which a man’s aspect naturally ceases to alter for the term of a dozen years or so; and, artificially, a woman’s does likewise. Thirty-five and fifty were his limits of variation—he might have been either, or anywhere between the two.

It may be said that married men of forty are usually ready and generous enough to fling passing glances at any specimen of moderate beauty they may discern by the way. Probably, as with persons playing whist for love, the consciousness of a certain immunity under any circumstances from that worst possible ultimate, the having to pay, makes them unduly speculative. Bathsheba was convinced that this unmoved person was not a married man.

When marketing was over, she rushed off to Liddy, who was waiting for her beside the yellow gig in which they had driven to town. The horse was put in, and on they trotted—Bathsheba’s sugar, tea, and drapery parcels being packed behind, and expressing in some indescribable manner, by their colour, shape, and general lineaments, that they were that young lady-farmer’s property, and the grocer’s and draper’s no more.

“I’ve been through it, Liddy, and it is over. I shan’t mind it again, for they will all have grown accustomed to seeing me there; but this morning it was as bad as being married—eyes everywhere!”

“I knowed it would be,” Liddy said. “Men be such a terrible class of society to look at a body.”

“But there was one man who had more sense than to waste his time upon me.” The information was put in this form that Liddy might not for a moment suppose her mistress was at all piqued. “A very good-looking man,” she continued, “upright; about forty, I should think. Do you know at all who he could be?”

Liddy couldn’t think.

“Can’t you guess at all?” said Bathsheba with some disappointment.

“I haven’t a notion; besides, ’tis no difference, since he took less notice of you than any of the rest. Now, if he’d taken more, it would have mattered a great deal.”

Bathsheba was suffering from the reverse feeling just then, and they bowled along in silence. A low carriage, bowling along still more rapidly behind a horse of unimpeachable breed, overtook and passed them.

“Why, there he is!” she said.

Liddy looked. “That! That’s Farmer Boldwood—of course ’tis—the man you couldn’t see the other day when he called.”

“Oh, Farmer Boldwood,” murmured Bathsheba, and looked at him as he outstripped them. The farmer had never turned his head once, but with eyes fixed on the most advanced point along the road, passed as unconsciously and abstractedly as if Bathsheba and her charms were thin air.

“He’s an interesting man—don’t you think so?” she remarked.

“0 yes, very. Everybody owns it,” replied Liddy.

“I wonder why he is so wrapt up and indifferent, and seemingly so far away from all he sees around him.”

“It is said—but not known for certain—that he met with some bitter disappointment when he was a young man and merry. A woman jilted him, they say.”

“People always say that—and we know very well women scarcely ever jilt men; ’tis the men who jilt us. I expect it is simply his nature to be so reserved.”

“Simply his nature—I expect so, miss—nothing else in the world.”

“Still, ’tis more romantic to think he has been served cruelly, poor thing! Perhaps, after all, he has.”

“Depend upon it he has. 0 yes, miss, he has! I feel he must have.”

“However, we are very apt to think extremes of people. I shouldn’t wonder after all if it wasn’t a little of both—just between the two—rather cruelly used and rather reserved.”

“0 dear no, miss—I can’t think it between the two!”

“That’s most likely.”

“Well, yes, so it is. I am convinced it is most likely. You may take my word, miss, that that’s what’s the matter with him.”

CHAPTER XIII

Sortes Sanctorum[bh](#bh_1)—The Valentine

IT WAS SUNDAY AFTERNOON in the farmhouse, on the thirteenth of February. Dinner being over Bathsheba, for want of a better companion, had asked Liddy to come and sit with her. The mouldy pile was dreary in winter-time before the candles were lighted and the shutters closed; the atmosphere of the place seemed as old as the walls; every nook behind the furniture had a temperature of its own, for the fire was not kindled in this part of the house early in the day; and Bathsheba’s new piano, which was an old one in other annals, looked particularly sloping and out of level on the warped floor before night threw a shade over its less prominent angles and hid the unpleasantness. Liddy, like a little brook, though shallow, was always rippling; her presence had not so much weight as to task thought, and yet enough to exercise it.

On the table lay an old quarto Bible, bound in leather. Liddy looking at it said,—

“Did you ever find out, miss, who you are going to marry by means of the Bible and key?”

“Don’t be so foolish, Liddy. As if such things could be.”

“Well, there’s a good deal in it, all the same.”

“Nonsense, child.”

“And it makes your heart beat fearful. Some believe in it; some don’t; I do.”

“Very well, let’s try it,” said Bathsheba, bounding from her seat with that total disregard of consistency which can be indulged in towards a dependent, and entering into the spirit of divination at once. “Go and get the front door key.”

Liddy fetched it. “I wish it wasn’t Sunday,” she said, on returning. “Perhaps ’tis wrong.”

“What’s right week days is right Sundays,” replied her mistress in a tone which was a proof in itself.

The book was opened—the leaves, drab with age, being quite worn away at much-read verses by the forefingers of unpractised readers in former days, where they were moved along under the line as an aid to the vision. The special verse in the Book of Ruth[6](#6_1) was sought out by Bathsheba, and the sublime words met her eye. They slightly thrilled and abashed her. It was Wisdom in the abstract facing Folly in the concrete. Folly in the concrete blushed, persisted in her intention, and placed the key on the book. A rusty patch immediately upon the verse, caused by previous pressure of an iron substance thereon, told that this was not the first time the old volume had been used for the purpose.

“Now keep steady, and be silent,” said Bathsheba.

The verse was repeated; the book turned round; Bathsheba blushed guiltily.

“Who did you try?” said Liddy curiously.

“I shall not tell you.”

“Did you notice Mr. Boldwood’s doings in church this morning, miss?” Liddy continued, adumbrating by the remark the track her thoughts had taken.

“No, indeed,” said Bathsheba, with serene indifference.

“His pew is exactly opposite yours, miss.”

“I know it.”

“And you did not see his goings on!”

“Certainly I did not, I tell you.”

Liddy assumed a smaller physiognomy, and shut her lips decisively.

This move was unexpected, and proportionately disconcerting. “What did he do?” Bathsheba said perforce.

“Didn’t turn his head to look at you once all the service.”

“Why should he?” again demanded her mistress, wearing a nettled look. “I didn’t ask him to.”

“Oh, no. But everybody else was noticing you; and it was odd he didn’t. There, ’tis like him. Rich and gentlemanly, what does he care?”

Bathsheba dropped into a silence intended to express that she had opinions on the matter too abstruse for Liddy’s comprehension, rather than that she had nothing to say.

“Dear me—I had nearly forgotten the valentine I bought yesterday,” she exclaimed at length.

“Valentine! who for, miss?” said Liddy. “Farmer Boldwood?”

It was the single name among all possible wrong ones that just at this moment seemed to Bathsheba more pertinent than the right.

“Well, no. It is only for little Teddy Coggan. I have promised him something, and this will be a pretty surprise for him. Liddy, you may as well bring me my desk and I’ll direct it at once.”

Bathsheba took from her desk a gorgeously illuminated and embossed design in post-octavo,[bi](#bi_1) which had been bought on the previous market-day at the chief stationer’s in Casterbridge. In the centre was a small oval enclosure; this was left blank, that the sender might insert tender words more appropriate to the special occasion than any generalities by a printer could possibly be.

“Here’s a place for writing,” said Bathsheba. “What shall I put?”

“Something of this sort, I should think,” returned Liddy promptly:—

“The rose is red,

The violet blue,

Carnation’s sweet,

And so are you.”

“Yes, that shall be it. It just suits itself to a chubby-faced child like him,” said Bathsheba. She inserted the words in a small though legible handwriting; enclosed the sheet in an envelope, and dipped her pen for the direction.

“What fun it would be to send it to the stupid old Boldwood, and how he would wonder!” said the irrepressible Liddy, lifting her eyebrows, and indulging in an awful mirth on the verge of fear as she thought of the moral and social magnitude of the man contemplated.

Bathsheba paused to regard the idea at full length. Boldwood’s had begun to be a troublesome image—a species of Daniel in her kingdom who persisted in kneeling eastward† when reason and common sense said that he might just as well follow suit with the rest, and afford her the official glance of admiration which cost nothing at all. She was far from being seriously concerned about his nonconformity. Still, it was faintly depressing that the most dignified and valuable man in the parish should withhold his eyes, and that a girl like Liddy should talk about it. So Liddy’s idea was at first rather harassing than piquant.

“No, I won’t do that. He wouldn’t see any humour in it.”

“He’d worry to death,” said the persistent Liddy.

“Really, I don’t care particularly to send it to Teddy,” remarked her mistress. “He’s rather a naughty child sometimes.”

“Yes—that he is.”

“Let’s toss, as men do,” said Bathsheba idly. “Now then, head, Boldwood; tail, Teddy. No, we won’t toss money on a Sunday, that would be tempting the devil indeed.”

“Toss this hymn-book; there can’t be no sinfulness in that, miss.”

“Very well. Open, Boldwood—shut, Teddy. No; it’s more likely to fall open. Open, Teddy—shut, Boldwood.”

The book went fluttering in the air and came down shut.

Bathsheba, a small yawn upon her mouth, took the pen, and with off-hand serenity directed the missive to Boldwood.

“Now light a candle, Liddy. Which seal shall we use? Here’s a unicorn’s head—there’s nothing in that. What’s this?—two doves—no. It ought to be something extraordinary, ought it not, Lidd? Here’s one with a motto—I remember it is some funny one, but I can’t read it. We’ll try this, and if it doesn’t do we’ll have another.”

A large red seal was duly affixed. Bathsheba looked closely at the hot wax to discover the words.

“Capital!” she exclaimed, throwing down the letter frolicsomely. “’Twould upset the solemnity of a parson and clerk too.”

Liddy looked at the words of the seal, and read—

“MARRY ME.”

The same evening the letter was sent, and was duly sorted in Casterbridge post-office that night, to be returned to Weatherbury again in the morning.

So very idly and unreflectingly was this deed done. Of love as a spectacle Bathsheba had a fair knowledge; but of love subjectively she knew nothing.

CHAPTER XIV

Effect of the Letter—Sunrise

AT DUSK ON THE evening of St. Valentine’s Day Boldwood sat down to supper as usual, by a beaming fire of aged logs. Upon the mantelshelf before him was a time-piece, surmounted by a spread eagle, and upon the eagle’s wings was the letter Bathsheba had sent. Here the bachelor’s gaze was continually fastening itself, till the large red seal became as a blot of blood on the retina of his eye; and as he ate and drank he still read in fancy the words thereon, although they were too remote for his sight—

“MARRY ME.”

The pert injunction was like those crystal substances, which, colourless themselves, assume the tone of objects about them. Here, in the quiet of Boldwood’s parlour, where everything that was not grave was extraneous, and where the atmosphere was that of a Puritan Sunday lasting all the week, the letter and its dictum changed their tenor from the thoughtlessness of their origin to a deep solemnity, imbibed from their accessories now.

Since the receipt of the missive in the morning, Boldwood had felt the symmetry of his existence to be slowly getting distorted in the direction of an ideal passion. The disturbance was as the first floating weed to Columbus[bj](#bj_1)—the contemptibly little suggesting possibilities of the infinitely great.

The letter must have had an origin and a motive. That the latter was of the smallest magnitude compatible with its existence at all, Boldwood, of course, did not know. And such an explanation did not strike him as a possibility even. It is foreign to a mystified condition of mind to realize of the mystifier that the processes of approving a course suggested by circumstance, and of striking out a course from inner impulse, would look the same in the result. The vast difference between starting a train of events, and directing into a particular groove a series already started, is rarely apparent to the person confounded by the issue.

When Boldwood went to bed he placed the valentine in the corner of the looking-glass. He was conscious of its presence, even when his back was turned upon it. It was the first time in Boldwood’s life that such an event had occurred. The same fascination that caused him to think it an act which had a deliberate motive prevented him from regarding it as an impertinence. He looked again at the direction. The mysterious influences of night invested the writing with the presence of the unknown writer. Somebody‘s—some woman’s—hand had travelled softly over the paper bearing his name; her unrevealed eyes had watched every curve as she formed it; her brain had seen him in imagination the while. Why should she have imagined him? Her mouth—were the lips red or pale, plump or creased?—had curved itself to a certain expression as the pen went on—the corners had moved with all their natural tremulousness: what had been the expression?

The vision of the woman writing, as a supplement to the words written, had no individuality. She was a misty shape, and well she might be, considering that her original was at that moment sound asleep and oblivious of all love and letter-writing under the sky. Whenever Boldwood dozed she took a form, and comparatively ceased to be a vision: when he awoke there was the letter justifying the dream.

The moon shone to-night, and its light was not of a customary kind. His window admitted only a reflection of its rays, and the pale sheen had that reversed direction which snow gives, coming upward and lighting up his ceiling in an unnatural way, casting shadows in strange places, and putting lights where shadows had used to be.

The substance of the epistle had occupied him but little in comparison with the fact of its arrival. He suddenly wondered if anything more might be found in the envelope than what he had withdrawn. He jumped out of bed in the weird light, took the letter, pulled out the flimsy sheet, shook the envelope—searched it. Nothing more was there. Boldwood looked, as he had a hundred times the preceding day, at the insistent red seal: “Marry me,” he said aloud.

The solemn and reserved yeoman again closed the letter, and stuck it in the frame of the glass. In doing so he caught sight of his reflected features, wan in expression, and insubstantial in form. He saw how closely compressed was his mouth, and that his eyes were wide-spread and vacant. Feeling uneasy and dissatisfied with himself for this nervous excitability, he returned to bed.

Then the dawn drew on. The full power of the clear heaven was not equal to that of a cloudy sky at noon, when Boldwood arose and dressed himself. He descended the stairs and went out towards the gate of a field to the east, leaning over which he paused and looked around.

It was one of the usual slow sunrises of this time of the year, and the sky, pure violet in the zenith, was leaden to the northward, and murky to the east, where, over the snowy down or ewe-lease[bk](#bk_1) on Weatherbury Upper Farm, and apparently resting upon the ridge, the only half of the sun yet visible burnt rayless, like a red and flameless fire shining over a white hearthstone. The whole effect resembled a sunset as childhood resembles age.

In other directions the fields and sky were so much of one colour by the snow that it was difficult in a hasty glance to tell whereabouts the horizon occurred; and in general there was here, too, that before-mentioned preternatural inversion of light and shade which attends the prospect when the garish brightness commonly in the sky is found on the earth, and the shades of earth are in the sky. Over the west hung the wasting moon, now dull and greenish-yellow, like tarnished brass.

Boldwood was listlessly noting how the frost had hardened and glazed the surface of the snow, till it shone in the red eastern light with the polish of marble; how, in some portions of the slope, withered grass-bents, encased in icicles, bristled through the smooth wan coverlet in the twisted and curved shapes of old Venetian glass; and how the footprints of a few birds, which had hopped over the snow whilst it lay in the state of a soft fleece, were now frozen to a short permanency. A half-muffled noise of light wheels interrupted him. Boldwood turned back into the road. It was the mail-cart—a crazy two-wheeled vehicle, hardly heavy enough to resist a puff of wind. The driver held out a letter. Boldwood seized it and opened it, expecting another anonymous one—so greatly are people’s ideas of probability a mere sense that precedent will repeat itself.

“I don’t think it is for you, sir,” said the man, when he saw Boldwood’s action. “Though there is no name, I think it is for your shepherd.”

Boldwood looked then at the address—

To the New Shepherd,

Weatherbury Farm,

Near Casterbridge.

“Oh—what a mistake!—it is not mine. Nor is it for my shepherd. It is for Miss Everdene’s. You had better take it on to him—Gabriel Oak—and say I opened it in mistake.”

At this moment on the ridge, up against the blazing sky, a figure was visible, like the black snuff in the midst of a candle-flame. Then it moved and began to bustle about vigorously from place to place, carrying square skeleton masses, which were riddled by the same rays. A small figure on all fours followed behind. The tall form was that of Gabriel Oak; the small one that of George; the articles in course of transit were hurdles.

“Wait,” said Boldwood. “That’s the man on the hill. I’ll take the letter to him myself.”

To Boldwood it was now no longer merely a letter to another man. It was an opportunity. Exhibiting a face pregnant with intention, he entered the snowy field.

Gabriel, at that minute, descended the hill towards the right. The glow stretched down in this direction now, and touched the distant roof of Warren’s Malthouse—whither the shepherd was apparently bent. Boldwood followed at a distance.

CHAPTER XV

A Morning Meeting—The Letter Again

THE SCARLET AND ORANGE light outside the malthouse did not penetrate to its interior, which was, as usual, lighted by a rival glow of similar hue, radiating from the hearth.

The maltster, after having lain down in his clothes for a few hours, was now sitting beside a three-legged table, breakfasting off bread and bacon. This was eaten on the plateless system, which is performed by placing a slice of bread upon the table, the meat flat upon the bread, a mustard plaster upon the meat, and a pinch of salt upon the whole, then cutting them vertically downwards with a large pocket-knife till wood is reached, when the severed lump is impaled on the knife, elevated, and sent the proper way of food.

The maltster’s lack of teeth appeared not to sensibly diminish his powers as a mill. He had been without them for so many years that toothlessness was felt less to be a defect than hard gums an acquisition. Indeed, he seemed to approach the grave as a hyperbolic curve approaches a straight line—less directly as he got nearer, till it was doubtful if he would ever reach it at all.

In the ashpit was a heap of potatoes roasting, and a boiling pipkin [bl](#bl_1) of charred bread, called “coffee,” for the benefit of whomsoever ever should call, for Warren’s was a sort of clubhouse, used as an alternative to the inn.

“I say, says I, we get a fine day, and then down comes a snapper† at night,” was a remark now suddenly heard spreading into the malthouse from the door, which had been opened the previous moment. The form of Henery Fray advanced to the fire, stamping the snow from his boots when about half-way there. The speech and entry had not seemed to be at all an abrupt beginning to the maltster, introductory matter being often omitted in this neighbourhood, both from word and deed, and the maltster having the same latitude allowed him, did not hurry to reply. He picked up a fragment of cheese by pecking upon it with his knife, as a butcher picks up skewers.

Henery appeared in a drab kerseymere[bm](#bm_1) great-coat, buttoned over his smock-frock, the white skirts of the latter being visible to the distance of about a foot below the coat-tails, which, when you got used to the style of dress, looked natural enough, and even ornamental—it certainly was comfortable.

Matthew Moon, Joseph Poorgrass, and other carters and waggoners followed at his heels, with great lanterns dangling from their hands, which showed that they had just come from the cart-horse stables, where they had been busily engaged since four o’clock that morning.

“And how is she getting on without a baily?” the maltster inquired.

Henery shook his head, and smiled one of the bitter smiles, dragging all the flesh of his forehead into a corrugated heap in the centre.

“She’ll rue it—surely, surely!” he said. “Benjy Pennyways were not a true man or an honest baily—as big a betrayer as Joey Iscariot† himself. But to think she can carr’ on alone!” He allowed his head to swing laterally three or four times in silence. “Never in all my creeping up—never!”

This was recognized by all as the conclusion of some gloomy speech which had been expressed in thought alone during the shake of the head; Henery meanwhile retained several marks of despair upon his face, to imply that they would be required for use again directly he should go on speaking.

“All will be ruined, and ourselves too, or there’s no meat in gentlemen’s houses!” said Mark Clark.

“A headstrong maid, that’s what she is—and won’t listen to no advice at all. Pride and vanity have ruined many a cobbler’s dog. Dear, dear, when I think o’ it, I sorrows like a man in travel! ”‡

“True, Henery, you do, I’ve heard ye,” said Joseph Poorgrass, in a voice of thorough attestation, and with a wire-drawn smile of misery.

“’Twould do a martel man no harm to have what’s under her bonnet,” said Billy Smallbury, who had just entered, bearing his one tooth before him. “She can spaik real language, and must have some sense somewhere. Do ye foller me?”

“I do; but no baily—I deserved that place,” wailed Henery, signifying wasted genius by gazing blankly at visions of a high destiny apparently visible to him on Billy Smallbury’s smock-frock. “There, ’twas to be, I suppose. Your lot is your lot, and Scripture is nothing; for if you do good you don’t get rewarded according to your works, but be cheated in some mean way out of your recompense.”

“No, no; I don’t agree with’ee there,” said Mark Clark. “God’s a perfect gentleman in that respect.”

“Good works good pay, so to speak it,” attested Joseph Poorgrass.

A short pause ensued, and as a sort of entr’acte[bn](#bn_1) Henery turned and blew out the lanterns, which the increase of daylight rendered no longer necessary even in the malthouse, with its one pane of glass.

“I wonder what a farmer-woman can want with a harpsichord, dulcimer, pianner, or whatever ‘tis they d’call it?” said the maltster. “Liddy saith she’ve a new one.”

“Got a pianner?”

“Ay. Seems her old uncle’s things were not good enough for her. She’ve bought all but everything new. There’s heavy chairs for the stout, weak and wiry ones for the slender; great watches, getting on to the size of clocks, to stand upon the chimbley-piece.”

“Pictures, for the most part wonderful frames.”

“And long horse-hair settles for the drunk, with horse-hair pillows at each end,” said Mr. Clark. “Likewise looking-glasses for the pretty, and lying books for the wicked.”

A firm loud tread was now heard stamping outside; the door was opened about six inches, and somebody on the other side exclaimed—

“Neighbours, have ye got room for a few new-born lambs?”

“Ay, sure, shepherd,” said the conclave.

The door was flung back till it kicked the wall and trembled from top to bottom with the blow. Mr. Oak appeared in the entry with a steaming face, haybands wound about his ankles to keep out the snow, a leather strap round his waist outside the smock-frock, and looking altogether an epitome of the world’s health and vigour. Four lambs hung in various embarrassing attitudes over his shoulders, and the dog George, whom Gabriel had contrived to fetch from Norcombe, stalked solemnly behind.

“Well, Shepherd Oak, and how’s lambing this year, if I mid say it?” inquired Joseph Poorgrass.

“Terrible trying,” said Oak. “I’ve been wet through twice a-day, either in snow or rain, this last fortnight. Cainy and I haven’t tined[bo](#bo_1) our eyes to-night.”

“A good few twins, too, I hear?”

“Too many by half. Yes; ’tis a very queer lambing this year. We shan’t have done by Lady Day.”†

“And last year ’twer all over by Sexajessamine Sunday,”‡ Joseph remarked.

“Bring on the rest, Cain,” said Gabriel, “and then run back to the ewes. I’ll follow you soon.”

Cainy Ball—a cheery-faced young lad, with a small circular orifice by way of mouth, advanced and deposited two others, and retired as he was bidden. Oak lowered the lambs from their unnatural elevation, wrapped them in hay, and placed them round the fire.

“We’ve no lambing-hut here, as I used to have at Norcombe,” said Gabriel, “and ‘tis such a plague to bring the weakly ones to a house. If ’twasn’t for your place here, malter, I don’t know what I should do, this keen weather. And how is it with you to-day, malter?”

“Oh, neither sick nor sorry, shepherd; but no younger.”

“Ay—I understand.”

“Sit down, Shepherd Oak,” continued the ancient man of malt. “And how was the old place at Norcombe, when ye went for your dog? I should like to see the old familiar spot; but faith, I shouldn’t know a soul there now.“

“I suppose you wouldn’t. ‘Tis altered very much.”

“Is it true that Dicky Hill’s wooden cider-house is pulled down?”

“O yes—years ago, and Dicky’s cottage just above it.”

“Well, to be sure!”

“Yes; and Tompkins’s old apple-tree is rooted[bp](#bp_1) that used to bear two hogsheads of cider, and no help from other trees.”

“Rooted?—you don’t say it! Ah! stirring times we live in—stirring times.”

“And you can mind the old well that used to be in the middle of the place? That’s turned into a solid iron pump with a large stone trough, and all complete.”

“Dear, dear—how the face of nations alter, and what we live to see nowadays! Yes—and ‘tis the same here. They’ve been talking but now of the mis’ess’s strange doings.”

“What have you been saying about her?” inquired Oak, sharply turning to the rest, and getting very warm.

“These middle-aged men have been pulling her over the coals for pride and vanity,” said Mark Clark; “but I say, let her have rope enough. Bless her pretty face—shouldn’t I like to do so—upon her cherry lips!” The gallant Mark Clark here made a peculiar and well-known sound with his own.

“Mark,” said Gabriel sternly, “now you mind this: none of that dalliance-talk-that smack-and-coddle† style of yours—about Miss Everdene. I don’t allow it. Do you hear?”

“With all my heart, as I’ve got no chance,” replied Mr. Clark cordially.

“I suppose you’ve been speaking against her?” said Oak, turning to Joseph Poorgrass with a very grim look.

“No, no—not a word I—’tis a real joyful thing that she’s no worse, that’s what I say,” said Joseph, trembling and blushing with terror. “Matthew just said—”

“Matthew Moon, what have you been saying?” asked Oak.

“I? Why ye know I wouldn’t harm a worm—no. not one underground worm?” said Matthew Moon, looking very uneasy.

“Well, somebody has—and look here, neighbours.” Gabriel, though one of the quietest and most gentle men on earth, rose to the occasion, with martial promptness and vigour. “That’s my fist.” Here he placed his fist, rather smaller in size than a common loaf, in the mathematical centre of the maltster’s little table, and with it gave a bump or two thereon, as if to ensure that their eyes all thoroughly took in the idea of fistiness before he went further. “Now—the first man in the parish that I hear prophesying bad of our mistress, why” (here the fist was raised and let fall, as Thor[bq](#bq_1) might have done with his hammer in assaying it)—“he’ll smell and taste that—or I’m a Dutchman.”

All earnestly expressed by their features that their minds did not wander to Holland for a moment on account of this statement, but were deploring the difference which gave rise to the figure; and Mark Clark cried “Hear, hear; just what I should ha’ said.” The dog George looked up at the same time after the shepherd’s menace, and, though he understood English but imperfectly, began to growl.

“Now, don’t ye take on so, shepherd, and sit down!” said Henery, with a deprecating peacefulness equal to anything of the kind in Christianity.

“We hear that ye be a extraordinary good and clever man, shepherd,” said Joseph Poorgrass with considerable anxiety from behind the maltster’s bedstead, whither he had retired for safety. ” ‘Tis a great thing to be clever, I’m sure,” he added, making movements associated with states of mind rather than body; “we wish we were, don’t we, neighbours?”

“Ay, that we do, sure,” said Matthew Moon, with a small anxious laugh towards Oak, to show how very friendly disposed he was likewise.

“Who’s been telling you I’m clever?” said Oak.

“’Tis blowed about from pillar to post quite common,” said Matthew. “We hear that ye can tell the time as well by the stars as we can by the sun and moon, shepherd.”

“Yes, I can do a little that way,” said Gabriel, as a man of medium sentiments on the subject.

“And that ye can make sun-dials, and prent folks’ names upon their waggons almost like copper-plate, with beautiful flourishes, and great long tails. A excellent fine thing for ye to be such a clever man, shepherd. Joseph Poorgrass used to prent to Farmer James Everdene’s waggons before you came, and ‘a could never mind which way to turn the J’s and E’s—could ye, Joseph?” Joseph shook his head to express how absolute was the fact that he couldn’t. “And so you used to do ’em the wrong way, like this, didn’t ye, Joseph?” Matthew marked on the dusty floor with his whip-handle


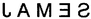


“And how Farmer James would cuss, and call thee a fool, wouldn’t he, Joseph, when ’a seed his name looking so inside-out-like?” continued Matthew Moon, with feeling.

“Ay—’a would,” said Joseph meekly. “But, you see, I wasn’t so much to blame, for them J’s and E’s be such trying sons o’ witches for the memory to mind whether they face backward or forward; and I always had such a forgetful memory, too.”

“’Tis a bad affliction for ye, being such a man of calamities in other ways.”

“Well, ‘tis; but a happy Providence ordered that it should be no worse, and I feel my thanks. As to shepherd, there, I’m sure mis’ess ought to have made ye her baily—such a fitting man for’t as you be.”

“I don’t mind owning that I expected it,” said Oak frankly. “Indeed, I hoped for the place. At the same time, Miss Everdene has a right to be her own baily if she choose—and to keep me down to be a common shepherd only.” Oak drew a slow breath, looked sadly into the bright ashpit, and seemed lost in thoughts not of the most hopeful hue.

The genial warmth of the fire now began to stimulate the nearly lifeless lambs to bleat and move their limbs briskly upon the hay, and to recognize for the first time the fact that they were born. Their noise increased to a chorus of baas, upon which Oak pulled the milk-can from before the fire, and taking a small tea-pot from the pocket of his smock-frock, filled it with milk, and taught those of the helpless creatures which were not to be restored to their dams how to drink from the spout—a trick they acquired with astonishing aptitude.

“And she don’t even let ye have the skins of the dead lambs, I hear?” resumed Joseph Poorgrass, his eyes lingering on the operations of Oak with the necessary melancholy.

“I don’t have them,” said Gabriel.

“Ye be very badly used, shepherd,” hazarded Joseph again, in the hope of getting Oak as an ally in lamentation after all. “I think she’s took against ye—that I do.”

“O no—not at all,” replied Gabriel hastily, and a sigh escaped him, which the deprivation of lamb skins could hardly have caused.

Before any further remark had been added a shade darkened the door, and Boldwood entered the malthouse, bestowing upon each a nod of a quality between friendliness and condescension.

“Ah! Oak, I thought you were here,” he said. “I met the mail-cart ten minutes ago, and a letter was put into my hand, which I opened without reading the address. I believe it is yours. You must excuse the accident, please.”

“O yes—not a bit of difference, Mr. Boldwood—not a bit,” said Gabriel readily. He had not a correspondent on earth, nor was there a possible letter coming to him whose contents the whole parish would not have been welcome to peruse.

Oak stepped aside, and read the following in an unknown hand:—

“Dear Friend—

I do not know your name, but I think these few lines will reach you, which I write to thank you for your kindness to me the night I left Weatherbury in a reckless way. I also return the money I owe you, which you will excuse my not keeping as a gift. All has ended well, and I am happy to say I am going to be married to the young man who has courted me for some time—Sergeant Troy, of the 11 th Dragoon Guards, now quartered in this town. He would, I know, object to my having received anything except as a loan, being a man of great respectability and high honour—indeed, a nobleman by blood.

“I should be much obliged to you if you would keep the contents of this letter a secret for the present, dear friend. We mean to surprise Weatherbury by coming there soon as husband and wife, though I blush to state it to one nearly a stranger. The sergeant grew up in Weatherbury. Thanking you again for your kindness,

I am, your sincere well-wisher,

Fanny Robin.”

“Have you read it, Mr. Boldwood?” said Gabriel; “if not, you had better do so. I know you are interested in Fanny Robin.”

Boldwood read the letter and looked grieved.

“Fanny—poor Fanny! the end she is so confident of has not yet come, she should remember—and may never come. I see she gives no address.”

“What sort of a man is this Sergeant Troy?” said Gabriel.

“H’m—I’m afraid not one to build much hope upon in such a case as this,” the farmer murmured, “though he’s a clever fellow, and up to everything. A slight romance attaches to him, too. His mother was a French governess, and it seems that a secret attachment existed between her and the late Lord Severn. She was married to a poor medical man, and soon after an infant was born; and while money was forthcoming all went on well. Unfortunately for her boy, his best friends died; and he got then a situation as second clerk at a lawyer’s in Casterbridge. He stayed there for some time, and might have worked himself into a dignified position of some sort had he not indulged in the wild freak of enlisting. I have much doubt if ever little Fanny will surprise us in the way she mentions—very much doubt. A silly girl—silly girl!”

The door was hurriedly burst open again, and in came running Cainy Ball out of breath, his mouth red and open, like the bell of a penny trumpet, from which he coughed with noisy vigour and great distension of face.

“Now, Cain Ball,” said Oak sternly, “why will you run so fast and lose your breath so? I’m always telling you of it.”

“Oh—I—a puff of mee breath—went—the wrong way, please, Mister Oak, and made me cough—hok—hok!”

“Well—what have you come for?”

“I’ve run to tell ye,” said the junior shepherd, supporting his exhausted youthful frame against the doorpost, “that you must come directly. Two more ewes have twinned—that’s what’s the matter, Shepherd Oak.”

“Oh, that’s it,” said Oak, jumping up, and dismissing for the present his thoughts on poor Fanny. “You are a good boy to run and tell me, Cain, and you shall smell a large plum pudding some day as a treat. But, before we go, Cainy, bring the tarpot, and we’ll mark this lot and have done with ’em.”

Oak took from his illimitable pockets a marking iron, dipped it into the pot, and imprinted on the buttocks of the infant sheep the initials of her he delighted to muse on—“B. E.,” which signified to all the region round that henceforth the lambs belonged to Farmer Bathsheba Everdene, and to no one else.

“Now, Cainy, shoulder your two, and off. Good morning, Mr. Boldwood.” The shepherd lifted the sixteen large legs and four small bodies he had himself brought, and vanished with them in the direction of the lambing field hard by—their frames being now in a sleek and hopeful state, pleasantly contrasting with their death’s-door plight of half an hour before.

Boldwood followed him a little way up the field, hesitated, and turned back. He followed him again with a last resolve, annihilating return. On approaching the nook in which the fold was constructed, the farmer drew out his pocket-book, unfastened it, and allowed it to lie open on his hand. A letter was revealed—Bathsheba’s.

“I was going to ask you, Oak,” he said, with unreal carelessness, “if you know whose writing this is?”

Oak glanced into the book, and replied instantly, with a flushed face, “Miss Everdene’s.”

Oak had coloured simply at the consciousness of sounding her name. He now felt a strangely distressing qualm from a new thought. The letter could of course be no other than anonymous, or the inquiry would not have been necessary.

Boldwood mistook his confusion: sensitive persons are always ready with their “Is it I?” in preference to objective reasoning.

“The question was perfectly fair,” he returned—and there was something incongruous in the serious earnestness with which he applied himself to an argument on a valentine. “You know it is always expected that privy inquiries will be made: that’s where the—fun lies.” If the word “fun” had been “torture,” it could not have been uttered with a more constrained and restless countenance than was Boldwood’s then.

Soon parting from Gabriel, the lonely and reserved man returned to his house to breakfast—feeling twinges of shame and regret at having so far exposed his mood by those fevered questions to a stranger. He again placed the letter on the mantelpiece, and sat down to think of the circumstances attending it by the light of Gabriel’s information.

CHAPTER XVI

All Saints’ and All Souls’

ON A WEEK-DAY MORNING a small congregation, consisting mainly of women and girls, rose from its knees in the mouldy nave of a church called All Saints’, in the distant barrack-town before-mentioned, at the end of a service without a sermon. They were about to disperse, when a smart footstep, entering the porch and coming up the central passage, arrested their attention. The step echoed with a ring unusual in a church; it was the clink of spurs. Everybody looked. A young cavalry soldier in a red uniform, with the three chevrons of a sergeant upon his sleeve, strode up the aisle, with an embarrassment which was only the more marked by the intense vigour of his step, and by the determination upon his face to show none. A slight flush had mounted his cheek by the time he had run the gauntlet between these women; but, passing on through the chancel arch, he never paused till he came close to the altar railing. Here for a moment he stood alone.

The officiating curate, who had not yet doffed his surplice, perceived the new-comer, and followed him to the communion-space. He whispered to the soldier, and then beckoned to the clerk, who in his turn whispered to an elderly woman, apparently his wife, and they also went up the chancel steps.

“’Tis a wedding!” murmured some of the women, brightening. “Let’s wait!”

The majority again sat down.

There was a creaking of machinery behind, and some of the young ones turned their heads. From the interior face of the west wall of the tower projected a little canopy with a quarter-jack[br](#br_1) and small bell beneath it, the automaton being driven by the same clock machinery that struck the large bell in the tower. Between the tower and the church was a close screen, the door of which was kept shut during services, hiding this grotesque clockwork from sight. At present, however, the door was open, and the egress of the jack, the blows on the bell, and the mannikin’s retreat into the nook again, were visible to many, and audible throughout the church.

The jack had struck half-past eleven.

“Where’s the woman?” whispered some of the spectators.

The young sergeant stood still with the abnormal rigidity of the old pillars around. He faced the south-east, and was as silent as he was still.

The silence grew to be a noticeable thing as the minutes went on, and nobody else appeared, and not a soul moved. The rattle of the quarter-jack again from its niche, its blows for three-quarters, its fussy retreat, were almost painfully abrupt, and caused many of the congregation to start palpably.

“I wonder where the woman is!” a voice whispered again.

There began now that slight shifting of feet, that artificial coughing among several, which betrays a nervous suspense. At length there was a titter. But the soldier never moved. There he stood, his face to the south-east, upright as a column, his cap in his hand.

The clock ticked on. The women threw off their nervousness, and titters and giggling became more frequent. Then came a dead silence. Every one was waiting for the end. Some persons may have noticed how extraordinarily the striking of quarters seems to quicken the flight of time. It was hardly credible that the jack had not got wrong with the minutes when the rattle began again, the puppet emerged, and the four quarters were struck fitfully as before. One could almost be positive that there was a malicious leer upon the hideous creature’s face, and a mischievous delight in its twitchings. Then followed the dull and remote resonance of the twelve heavy strokes in the tower above. The women were impressed, and there was no giggle this time.

The clergyman glided into the vestry, and the clerk vanished. The sergeant had not yet turned; every woman in the church was waiting to see his face, and he appeared to know it. At last he did turn, and stalked resolutely down the nave, braving them all, with a compressed lip. Two bowed and toothless old almsmen then looked at each other and chuckled, innocently enough; but the sound had a strange weird effect in that place.

Opposite to the church was a paved square, around which several overhanging wood buildings of old time cast a picturesque shade. The young man on leaving the door went to cross the square, when, in the middle, he met a little woman. The expression of her face, which had been one of intense anxiety, sank at the sight of his nearly to terror.

“Well?” he said, in a suppressed passion, fixedly looking at her.

“O Frank—I made a mistake!—I thought that church with the spire was All Saints‘, and I was at the door at half-past eleven to a minute as you said. I waited till a quarter to twelve, and found then that I was in All Souls’. But I wasn’t much frightened, for I thought it could be to-morrow as well.”

“You fool, for so fooling me! But say no more.”

“Shall it be to-morrow, Frank?” she asked blankly.

“To-morrow!” and he gave vent to a hoarse laugh. “I don’t go through that experience again for some time, I warrant you!”

“But after all,” she expostulated in a trembling voice, “the mistake was not such a terrible thing! Now, dear Frank, when shall it be?”

“Ah, when? God knows!” he said, with a light irony, and turning from her walked rapidly away.

CHAPTER XVII

In the Market-Place

ON SATURDAY BOLDWOOD WAS in Casterbridge market-house as usual, when the disturber of his dreams entered, and became visible to him. Adam had awakened from his deep sleep, and behold! there was Eve.[bs](#bs_1) The farmer took courage, and for the first time really looked at her.

Material causes and emotional effects are not to be arranged in regular equation. The result from capital employed in the production of any movement of a mental nature is sometimes as tremendous as the cause itself is absurdly minute. When women are in a freakish mood their usual intuition, either from carelessness or inherent defect, seemingly fails to teach them this, and hence it was that Bathsheba was fated to be astonished to-day.

Boldwood looked at her—not slily, critically, or understandingly, but blankly at gaze, in the way a reaper looks up at a passing train—as something foreign to his element, and but dimly understood. To Boldwood women had been remote phenomena rather than necessary complements—comets of such uncertain aspect, movement, and permanence, that whether their orbits were as geometrical, unchangeable, and as subject to laws as his own, or as absolutely erratic as they superficially appeared, he had not deemed it his duty to consider.

He saw her black hair, her correct facial curves and profile, and the roundness of her chin and throat. He saw then the side of her eyelids, eyes, and lashes, and the shape of her ear. Next he noticed her figure, her skirt, and the very soles of her shoes.

Boldwood thought her beautiful, but wondered whether he was right in his thought, for it seemed impossible that this romance in the flesh, if so sweet as he imagined, could have been going on long without creating a commotion of delight among men, and provoking more inquiry than Bathsheba had done, even though that was not a little. To the best of his judgment neither nature nor art could improve this perfect one of an imperfect many. His heart began to move within him. Boldwood, it must be remembered, though forty years of age, had never before inspected a woman with the very centre and force of his glance; they had struck upon all his senses at wide angles.

Was she really beautiful? He could not assure himself that his opinion was true even now. He furtively said to a neighbour, “Is Miss Everdene considered handsome?”

“O yes; she was a good deal noticed the first time she came, if you remember. A very handsome girl indeed.”

A man is never more credulous than in receiving favourable opinions on the beauty of a woman he is half, or quite, in love with; a mere child’s word on the point has the weight of an R.A.’s.[bt](#bt_1) Boldwood was satisfied now.

And this charming woman had in effect said to him, “Marry me.” Why should she have done that strange thing? Boldwood’s blindness to the difference between approving of what circumstances suggest, and originating what they do not suggest, was well matched by Bathsheba’s insensibility to the possibly great issues of little beginnings.

She was at this moment coolly dealing with a dashing young farmer, adding up accounts with him as indifferently as if his face had been the pages of a ledger. It was evident that such a nature as his had no attraction for a woman of Bathsheba’s taste. But Boldwood grew hot down to his hands with an incipient jealousy; he trod for the first time the threshold of “the injured lover’s hell.”† His first impulse was to go and thrust himself between them. This could be done, but only in one way—by asking to see a sample of her corn. Boldwood renounced the idea. He could not make the request; it was debasing loveliness to ask it to buy and sell, and jarred with his conceptions of her.

All this time Bathsheba was conscious of having broken into that dignified stronghold at last. His eyes, she knew, were following her everywhere. This was a triumph; and had it come naturally, such a triumph would have been the sweeter to her for this piquing delay. But it had been brought about by misdirected ingenuity, and she valued it only as she valued an artificial flower or a wax fruit.

Being a woman with some good sense in reasoning on subjects wherein her heart was not involved, Bathsheba genuinely repented that a freak which had owed its existence as much to Liddy as to herself, should ever have been undertaken, to disturb the placidity of a man she respected too highly to deliberately tease.

She that day nearly formed the intention of begging his pardon on the very next occasion of their meeting. The worst features of this arrangement were that, if he thought she ridiculed him, an apology would increase the offence by being disbelieved; and if he thought she wanted him to woo her, it would read like additional evidence of her forwardness.

CHAPTER XVIII

Boldwood in Meditation—Regret

BOLDWOOD WAS TENANT OF what was called Little Weatherbury Farm, and his person was the nearest approach to aristocracy that this remoter quarter of the parish could boast of. Genteel strangers, whose god was their town, who might happen to be compelled to linger about this nook for a day, heard the sound of light wheels, and prayed to see good society, to the degree of a solitary lord, or squire at the very least, but it was only Mr. Boldwood going out for the day. They heard the sound of wheels yet once more, and were re-animated to expectancy: it was only Mr. Boldwood coming home again.

His house stood recessed from the road, and the stables, which are to a farm what a fireplace is to a room, were behind, their lower portions being lost amid bushes of laurel. Inside the blue door, open half-way down, were to be seen at this time the backs and tails of half-a-dozen warm and contented horses standing in their stalls; and as thus viewed, they presented alternations of roan and bay, in shapes like a Moorish arch,[bu](#bu_1) the tail being a streak down the midst of each. Over these, and lost to the eye gazing in from the outer light, the mouths of the same animals could be heard busily sustaining the above-named warmth and plumpness by quantities of oats and hay. The restless and shadowy figure of a colt wandered about a loose-box† at the end, whilst the steady grind of all the eaters was occasionally diversified by the rattle of a rope or the stamp of a foot.

Pacing up and down at the heels of the animals was Farmer Boldwood himself. This place was his almonry and cloister‡ in one: here, after looking to the feeding of his four-footed dependants, the celibate would walk and meditate of an evening till the moon’s rays streamed in through the cobwebbed windows, or total darkness enveloped the scene.

His square-framed perpendicularity showed more fully now than in the crowd and bustle of the market-house. In this meditative walk his foot met the floor with heel and toe simultaneously, and his fine reddish-fleshed face was bent downwards just enough to render obscure the still mouth and the well-rounded though rather prominent and broad chin. A few clear and thread-like horizontal lines were the only interruption to the otherwise smooth surface of his large forehead.

The phases of Boldwood’s life were ordinary enough, but his was not an ordinary nature. That stillness, which struck casual observers more than anything else in his character and habit, and seemed so precisely like the rest of inanition, may have been the perfect balance of enormous antagonistic forces—positives and negatives in fine adjustment. His equilibrium disturbed, he was in extremity at once. If an emotion possessed him at all, it ruled him; a feeling not mastering him was entirely latent. Stagnant or rapid, it was never slow. He was always hit mortally, or he was missed.

He had no light and careless touches in his constitution, either for good or for evil. Stern in the outlines of action, mild in the details, he was serious throughout all. He saw no absurd sides to the follies of life, and thus, though not quite companionable in the eyes of merry men and scoffers, and those to whom all things show life as a jest, he was not intolerable to the earnest and those acquainted with grief. Being a man who read all the dramas of life seriously, if he failed to please when they were comedies, there was no frivolous treatment to reproach him for when they chanced to end tragically.

Bathsheba was far from dreaming that the dark and silent shape upon which she had so carelessly thrown a seed was a hotbed of tropic intensity. Had she known Boldwood’s moods her blame would have been fearful, and the stain upon her heart ineradicable. Moreover, had she known her present power for good or evil over this man, she would have trembled at her responsibility. Luckily for her present, unluckily for her future tranquillity, her understanding had not yet told her what Boldwood was. Nobody knew entirely; for though it was possible to form guesses concerning his wild capabilities from old floodmarks faintly visible, he had never been seen at the high tides which caused them.

Farmer Boldwood came to the stable-door and looked forth across the level fields. Beyond the first enclosure was a hedge, and on the other side of this a meadow belonging to Bathsheba’s farm.

It was now early spring—the time of going to grass with the sheep, when they have the first feed of the meadows, before these are laid up for mowing. The wind, which had been blowing east for several weeks, had veered to the southward, and the middle of spring had come abruptly—almost without a beginning. It was that period in the vernal quarter when we may suppose the Dryads[bv](#bv_1) to be waking for the season. The vegetable world begins to move and swell and the saps to rise, till in the completest silence of lone gardens and trackless plantations, where everything seems helpless and still after the bond and slavery of frost, there are bustlings, strainings, united thrusts, and pulls-all-together, in comparison with which the powerful tugs of cranes and pulleys in a noisy city are but pigmy efforts.

Boldwood, looking into the distant meadows, saw there three figures. They were those of Miss Everdene, Shepherd Oak, and Cainy Ball.

When Bathsheba’s figure shone upon the farmer’s eyes it lighted him up as the moon lights up a great tower. A man’s body is as the shell, or the tablet, of his soul, as he is reserved or ingenuous, overflowing or self-contained. There was a change in Boldwood’s exterior from its former impassibleness; and his face showed that he was now living outside his defences for the first time, and with a fearful sense of exposure. It is the usual experience of strong natures when they love.

At last he arrived at a conclusion. It was to go across and inquire boldly of her.

The insulation of his heart by reserve during these many years, without a channel of any kind for disposable emotion, had worked its effect. It has been observed more than once that the causes of love are chiefly subjective, and Boldwood was a living testimony to the truth of the proposition. No mother existed to absorb his devotion, no sister for his tenderness, no idle ties for sense. He became surcharged with the compound, which was genuine lover’s love.

He approached the gate of the meadow. Beyond it the ground was melodious with ripples, and the sky with larks; the low bleating of the flock mingling with both. Mistress and man were engaged in the operation of making a lamb “take,” which is performed whenever an ewe has lost her own offspring, one of the twins of another ewe being given her as a substitute. Gabriel had skinned the dead lamb, and was tying the skin over the body of the live lamb in the customary manner, whilst Bathsheba was holding open a little pen of four hurdles, into which the mother and foisted lamb were driven, where they would remain till the old sheep conceived an affection for the young one.

Bathsheba looked up at the completion of the manoeuver and saw the farmer by the gate, where he was overhung by a willow tree in full bloom. Gabriel, to whom her face was as the uncertain glory of an April day,[bw](#bw_1) was ever regardful of its faintest changes, and instantly discerned thereon the mark of some influence from without, in the form of a keenly self-conscious reddening. He also turned and beheld Boldwood.

At once connecting these signs with the letter Boldwood had shown him, Gabriel suspected her of some coquettish procedure begun by that means, and carried on since, he knew not how.

Farmer Boldwood had read the pantomime denoting that they were aware of his presence, and the perception was as too much light turned upon his new sensibility. He was still in the road, and by moving on he hoped that neither would recognize that he had originally intended to enter the field. He passed by with an utter and overwhelming sensation of ignorance, shyness, and doubt. Perhaps in her manner there were signs that she wished to see him—perhaps not—he could not read a woman. The cabala† of this erotic philosophy seemed to consist of the subtlest meanings expressed in misleading ways. Every turn, look, word, and accent contained a mystery quite distinct from its obvious import, and not one had ever been pondered by him until now.

As for Bathsheba, she was not deceived into the belief that Farmer Boldwood had walked by on business or in idleness. She collected the probabilities of the case, and concluded that she was herself responsible for Boldwood’s appearance there. It troubled her much to see what a great flame a little wildfire was likely to kindle. Bathsheba was no schemer for marriage, nor was she deliberately a trifler with the affections of men, and a censor’s experience on seeing an actual flirt after observing her would have been a feeling of surprise that Bathsheba could be so different from such a one, and yet so like what a flirt is supposed to be.

She resolved never again, by look or by sign, to interrupt the steady flow of this man’s life. But a resolution to avoid an evil is seldom framed till the evil is so far advanced as to make avoidance impossible.

CHAPTER XIX

The Sheep-Washing—The Offer

BOLDWOOD DID EVENTUALLY CALL upon her. She was not at home. “Of course not,” he murmured. In contemplating Bathsheba as a woman, he had forgotten the accidents of her position as an agriculturist—that being as much of a farmer, and as extensive a farmer, as himself, her probable whereabouts was out-of-doors at this time of the year. This, and the other oversights Boldwood was guilty of, were natural to the mood, and still more natural to the circumstances. The great aids to idealization in love were present here: occasional observation of her from a distance, and the absence of social intercourse with her—visual familiarity, oral strangeness. The smaller human elements were kept out of sight; the pettinesses that enter so largely into all earthly living and doing were disguised by the accident of lover and loved-one not being on visiting terms; and there was hardly awakened a thought in Boldwood that sorry household realities appertained to her, or that she, like all others, had moments of commonplace, when to be least plainly seen was to be most prettily remembered. Thus a mild sort of apotheosis took place in his fancy, whilst she still lived and breathed within his own horizon, a troubled creature like himself

It was the end of May when the farmer determined to be no longer repulsed by trivialities or distracted by suspense. He had by this time grown used to being in love; the passion now startled him less even when it tortured him more, and he felt himself adequate to the situation. On inquiring for her at her house they had told him she was at the sheep-washing, and he went off to seek her there.

The sheep-washing pool was a perfectly circular basin of brickwork in the meadows, full of the clearest water. To birds on the wing its glassy surface, reflecting the light sky, must have been visible for miles around as a glistening Cyclops’ eye[bx](#bx_1) in a green face. The grass about the margin at this season was a sight to remember long—in a minor sort of way. Its activity in sucking the moisture from the rich damp sod was almost a process observable by the eye. The outskirts of this level water-meadow were diversified by rounded and hollow pastures, where just now every flower that was not a buttercup was a daisy. The river slid along noiselessly as a shade, the swelling reeds and sedge forming a flexible palisade upon its moist brink. To the north of the mead were trees, the leaves of which were new, soft, and moist, not yet having stiffened and darkened under summer sun and drought, their colour being yellow beside a green—green beside a yellow. From the recesses of this knot of foliage the loud notes of three cuckoos were resounding through the still air.

Boldwood went meditating down the slopes with his eyes on his boots, which the yellow pollen from the buttercups had bronzed in artistic gradations. A tributary of the main stream flowed through the basin of the pool by an inlet and outlet at opposite points of its diameter. Shepherd Oak, Jan Coggan, Moon, Poorgrass, Cain Ball, and several others were assembled here, all dripping wet to the very roots of their hair, and Bathsheba was standing by in a new riding-habit-the most elegant she had ever worn—the reins of her horse being looped over her arm. Flagons of cider were rolling about upon the green. The meek sheep were pushed into the pool by Coggan and Matthew Moon, who stood by the lower hatch, immersed to their waists; then Gabriel, who stood on the brink, thrust them under as they swam along, with an instrument like a crutch, formed for the purpose, and also for assisting the exhausted animals when the wool became saturated and they began to sink. They were let out against the stream, and through the upper opening, all impurities flowing away below. Cainy Ball and Joseph, who performed this latter operation, were if possible wetter than the rest; they resembled dolphins under a fountain, every protuberance and angle of their clothes dribbling forth a small rill.

Boldwood came close and bade her good morning with such constraint that she could not but think he had stepped across to the washing for its own sake, hoping not to find her there; more, she fancied his brow severe and his eye slighting. Bathsheba immediately contrived to withdraw, and glided along by the river till she was a stone’s throw off. She heard footsteps brushing the grass, and had a consciousness that love was encircling her like a perfume. Instead of turning or waiting, Bathsheba went further among the high sedges, but Boldwood seemed determined, and pressed on till they were completely past the bend of the river. Here, without being seen, they could hear the splashing and shouts of the washers above.

“Miss Everdene!” said the farmer.

She trembled, turned, and said “Good morning.” His tone was so utterly removed from all she had expected as a beginning. It was lowness and quiet accentuated: an emphasis of deep meanings, their form, at the same time, being scarcely expressed. Silence has sometimes a remarkable power of showing itself as the disembodied soul of feeling wandering without its carcase, and it is then more impressive than speech. In the same way, to say a little is often to tell more than to say a great deal. Boldwood told everything in that word.

As the consciousness expands on learning that what was fancied to be the rumble of wheels is the reverberation of thunder, so did Bathsheba’s at her intuitive conviction.

“I feel—almost too much—to think,” he said, with a solemn simplicity. “I have come to speak to you without preface. My life is not my own since I have beheld you clearly, Miss Everdene—I come to make you an offer of marriage.”

Bathsheba tried to preserve an absolutely neutral countenance, and all the motion she made was that of closing lips which had previously been a little parted.

“I am now forty-one years old,” he went on. “I may have been called a confirmed bachelor, and I was a confirmed bachelor. I had never any views of myself as a husband in my earlier days, nor have I made any calculation on the subject since I have been older. But we all change, and my change, in this matter, came with seeing you. I have felt lately, more and more, that my present way of living is bad in every respect. Beyond all things, I want you as my wife.”

“I feel, Mr. Boldwood, that though I respect you much, I do not feel—what would justify me to—in accepting your offer,” she stammered.

This giving back of dignity for dignity seemed to open the sluices of feeling that Boldwood had as yet kept closed.

“My life is a burden without you,” he exclaimed, in a low voice. “I want you—I want you to let me say I love you again and again!”

Bathsheba answered nothing, and the mare upon her arm seemed so impressed that instead of cropping the herbage she looked up.

“I think and hope you care enough for me to listen to what I have to tell!”

Bathsheba’s momentary impulse at hearing this was to ask why he thought that, till she remembered that, far from being a conceited assumption on Boldwood’s part, it was but the natural conclusion of serious reflection based on deceptive premises of her own offering.

“I wish I could say courteous flatteries to you,” the farmer continued in an easier tone, “and put my rugged feeling into a graceful shape: but I have neither power nor patience to learn such things. I want you for my wife—so wildly that no other feeling can abide in me; but I should not have spoken out had I not been led to hope.”

“The valentine again! O that valentine!” she said to herself, but not a word to him.

“If you can love me say so, Miss Everdene. If not—don’t say no!”

“Mr. Boldwood, it is painful to have to say I am surprised, so that I don’t know how to answer you with propriety and respect—but am only just able to speak out my feeling—I mean my meaning; that I am afraid I can’t marry you, much as I respect you. You are too dignified for me to suit you, sir.”

“But, Miss Everdene!”

“I—I didn’t—I know I ought never to have dreamt of sending that valentine—forgive me, sir—it was a wanton thing which no woman with any self-respect should have done. If you will only pardon my thoughtlessness, I promise never to—”

“No, no, no. Don’t say thoughtlessness! Make me think it was something more—that it was a sort of prophetic instinct—the beginning of a feeling that you would like me. You torture me to say it was done in thoughtlessness—I never thought of it in that light, and I can’t endure it. Ah! I wish I knew how to win you! but that I can’t do—I can only ask if I have already got you. If I have not, and it is not true that you have come unwittingly to me as I have to you, I can say no more.

“I have not fallen in love with you, Mr. Boldwood—certainly I must say that.” She allowed a very small smile to creep for the first time over her serious face in saying this, and the white row of upper teeth, and keenly-cut lips already noticed, suggested an idea of heartlessness, which was immediately contradicted by the pleasant eyes.

“But you will just think—in kindness and condescension think—if you cannot bear with me as a husband! I fear I am too old for you, but believe me I will take more care of you than would many a man of your own age. I will protect and cherish you with all my strength—I will indeed! You shall have no cares—be worried by no household affairs, and live quite at ease, Miss Everdene. The dairy superintendence shall be done by a man—I can afford it well—you shall never have so much as to look out of doors at haymaking time, or to think of weather in the harvest. I rather cling to the chaise, because it is the same my poor father and mother drove, but if you don’t like it I will sell it, and you shall have a pony-carriage of your own. I cannot say how far above every other idea and object on earth you seem to me—nobody knows—God only knows—how much you are to me!”

Bathsheba’s heart was young, and it swelled with sympathy for the deep-natured man who spoke so simply.

“Don’t say it: don’t! I cannot bear you to feel so much, and me to feel nothing. And I am afraid they will notice us, Mr. Boldwood. Will you let the matter rest now? I cannot think collectedly. I did not know you were going to say this to me. O, I am wicked to have made you suffer so!” She was frightened as well as agitated at his vehemence.

“Say then, that you don’t absolutely refuse. Do not quite refuse?”

“I can do nothing. I cannot answer.”

“I may speak to you again on the subject?”

“Yes.”

“I may think of you?”

“Yes, I suppose you may think of me.”

“And hope to obtain you?”

“No—do not hope! Let us go on.”

“I will call upon you again to-morrow.”

“No—please not. Give me time.”

“Yes—I will give you any time,” he said earnestly and gratefully. “I am happier now.”

“No—I beg you! Don’t be happier if happiness only comes from my agreeing. Be neutral, Mr. Boldwood! I must think.”

“I will wait,” he said.

And then she turned away. Boldwood dropped his gaze to the ground, and stood long like a man who did not know where he was. Realities then returned upon him like the pain of a wound received in an excitement which eclipses it, and he, too, then went on.

CHAPTER XX

Perplexity—Grinding the Shears—A Quarrel

“HE IS SO DISINTERESTED and kind to offer me all that I can desire,” Bathsheba mused.

Yet Farmer Boldwood, whether by nature kind or the reverse to kind, did not exercise kindness here. The rarest offerings of the purest loves are but a self-indulgence, and no generosity at all.

Bathsheba, not being the least in love with him, was eventually able to look calmly at his offer. It was one which many women of her own station in the neighbourhood, and not a few of higher rank, would have been wild to accept and proud to publish. In every point of view, ranging from politic to passionate, it was desirable that she, a lonely girl, should marry, and marry this earnest, well-to-do, and respected man. He was close to her doors: his standing was sufficient: his qualities were even supererogatory. Had she felt, which she did not, any wish whatever for the married state in the abstract, she could not reasonably have rejected him, being a woman who frequently appealed to her understanding for deliverance from her whims. Boldwood as a means to marriage was unexceptionable: she esteemed and liked him, yet she did not want him. It appears that ordinary men take wives because possession is not possible without marriage, and that ordinary women accept husbands because marriage is not possible without possession; with totally differing aims the method is the same on both sides. But the understood incentive on the woman’s part was wanting here. Besides, Bathsheba’s position as absolute mistress of a farm and house was a novel one, and the novelty had not yet begun to wear off.

But a disquiet filled her which was somewhat to her credit, for it would have affected few. Beyond the mentioned reasons with which she combated her objections, she had a strong feeling that, having been the one who began the game, she ought in honesty to accept the consequences. Still the reluctance remained. She said in the same breath that it would be ungenerous not to marry Boldwood, and that she couldn’t do it to save her life.

Bathsheba’s was an impulsive nature under a deliberative aspect. An Elizabeth in brain and a Mary Stuart in spirit,[by](#by_1) she often performed actions of the greatest temerity with a manner of extreme discretion. Many of her thoughts were perfect syllogisms; unluckily they always remained thoughts. Only a few were irrational assumptions; but, unfortunately, they were the ones which most frequently grew into deeds.

The next day to that of the declaration she found Gabriel Oak at the bottom of her garden, grinding his shears for the sheep-shearing. All the surrounding cottages were more or less scenes of the same operation; the scurr† of whetting spread into the sky from all parts of the village as from an armoury previous to a campaign. Peace and war kiss each other at their hours of preparation—sickles, scythes, shears, and pruning-hooks ranking with swords, bayonets, and lances, in their common necessity for point and edge.

Cainy Ball turned the handle of Gabriel’s grindstone, his head performing a melancholy see-saw up and down with each turn of the wheel. Oak stood somewhat as Eros‡ is represented when in the act of sharpening his arrows: his figure slightly bent, the weight of his body thrown over on the shears, and his head balanced sideways, with a critical compression of the lips and contraction of the eyelids to crown the attitude.

His mistress came up and looked upon them in silence for a minute or two; then she said—

“Cain, go to the lower mead and catch the bay mare. I’ll turn the winch of the grindstone. I want to speak to you, Gabriel.”

Cain departed, and Bathsheba took the handle. Gabriel had glanced up in intense surprise, quelled its expression, and looked down again. Bathsheba turned the winch, and Gabriel applied the shears.

The peculiar motion involved in turning a wheel has a wonderful tendency to benumb the mind. It is a sort of attenuated variety of Ixion’s punishment,[bz](#bz_1) and contributes a dismal chapter to the history of gaols. The brain gets muddled, the head grows heavy, and the body’s centre of gravity seems to settle by degrees in a leaden lump somewhere between the eyebrows and the crown. Bathsheba felt the unpleasant symptoms after two or three dozen turns.

“Will you turn, Gabriel, and let me hold the shears?” she said. “My head is in a whirl, and I can’t talk.”

Gabriel turned. Bathsheba then began, with some awkwardness, allowing her thoughts to stray occasionally from her story to attend to the shears, which required a little nicety in sharpening.

“I wanted to ask you if the men made any observations on my going behind the sedge with Mr. Boldwood yesterday?”

“Yes, they did,” said Gabriel. “You don’t hold the shears right, miss—I knew you wouldn’t know the way—hold like this.”

He relinquished the winch, and enclosing her two hands completely in his own (taking each as we sometimes clasp a child’s hand in teaching him to write), grasped the shears with her. “Incline the edge so,” he said.

Hands and shears were inclined to suit the words, and held thus for a peculiarly long time by the instructor as he spoke.

“That will do,” exclaimed Bathsheba. “Loose my hands. I won’t have them held! Turn the winch.”

Gabriel freed her hands quietly, retired to his handle, and the grinding went on.

“Did the men think it odd?” she said again.

“Odd was not the idea, miss.”

“What did they say?”

“That Farmer Boldwood’s name and your own were likely to be flung over pulpit together before the year was out.”

“I thought so by the look of them! Why, there’s nothing in it. A more foolish remark was never made, and I want you to contradict it: that’s what I came for.”

Gabriel looked incredulous and sad, but between his moments of incredulity, relieved.

“They must have heard our conversation,” she continued.

“Well, then, Bathsheba!” said Oak, stopping the handle, and gazing into her face with astonishment.

“Miss Everdene, you mean,” she said, with dignity.

“I mean this, that if Mr. Boldwood really spoke of marriage, I bain’t going to tell a story and say he didn’t to please you. I have already tried to please you too much for my own good!”

Bathsheba regarded him with round-eyed perplexity. She did not know whether to pity him for disappointed love of her, or to be angry with him for having got over it—his tone being ambiguous.

“I said I wanted you just to mention that it was not true I was going to be married to him,” she murmured, with a slight decline in her assurance.

“I can say that to them if you wish, Miss Everdene. And I could likewise give an opinion to ’ee on what you have done.”

“I daresay. But I don’t want your opinion.”

“I suppose not,” said Gabriel bitterly, and going on with his turning; his words rising and falling in a regular swell and cadence as he stooped or rose with the winch, which directed them, according to his position, perpendicularly into the earth, or horizontally along the garden, his eyes being fixed on a leaf upon the ground.

With Bathsheba a hastened act was a rash act; but, as does not always happen, time gained was prudence ensured. It must be added, however, that time was very seldom gained. At this period the single opinion in the parish on herself and her doings that she valued as sounder than her own was Gabriel Oak’s. And the outspoken honesty of his character was such that on any subject, even that of her love for, or marriage with, another man, the same disinterestedness of opinion might be calculated on, and be had for the asking. Thoroughly convinced of the impossibility of his own suit, a high resolve constrained him not to injure that of another. This is a lover’s most stoical virtue, as the lack of it is a lover’s most venial sin. Knowing he would reply truly she asked the question, painful as she must have known the subject would be. Such is the selfishness of some charming women. Perhaps it was some excuse for her thus torturing honesty to her own advantage, that she had absolutely no other sound judgment within easy reach.

“Well, what is your opinion of my conduct,” she said quietly.

“That it is unworthy of any thoughtful, and meek, and comely woman.

In an instant Bathsheba’s face coloured with the angry crimson of a Danby sunset.[ca](#ca_1) But she forbore to utter this feeling, and the reticence of her tongue only made the loquacity of her face the more noticeable.

The next thing Gabriel did was to make a mistake.

“Perhaps you don’t like the rudeness of my reprimanding you, for I know it is rudeness; but I thought it would do good.”

She instantly replied sarcastically—

“On the contrary, my opinion of you is so low, that I see in your abuse the praise of discerning people!”

“I am glad you don’t mind it, for I said it honestly and with every serious meaning.”

“I see. But, unfortunately, when you try not to speak in jest you are amusing—just as when you wish to avoid seriousness you sometimes say a sensible word.”

It was a hard hit, but Bathsheba had unmistakably lost her temper, and on that account Gabriel had never in his life kept his own better. He said nothing. She then broke out—

“I may ask, I suppose, where in particular my unworthiness lies? In my not marrying you, perhaps!”

“Not by any means,” said Gabriel quietly. “I have long given up thinking of that matter.”

“Or wishing it, I suppose,” she said; and it was apparent that she expected an unhesitating denial of this supposition.

Whatever Gabriel felt, he coolly echoed her words—

“Or wishing it either.”

A woman may be treated with a bitterness which is sweet to her, and with a rudeness which is not offensive. Bathsheba would have submitted to an indignant chastisement for her levity had Gabriel protested that he was loving her at the same time; the impetuosity of passion unrequited is bearable, even if it stings and anathematizes—there is a triumph in the humiliation, and a tenderness in the strife. This was what she had been expecting, and what she had not got. To be lectured because the lecturer saw her in the cold morning light of open-shuttered disillusion was exasperating. He had not finished, either. He continued in a more agitated voice:—

“My opinion is (since you ask it) that you are greatly to blame for playing pranks upon a man like Mr. Boldwood, merely as a pastime. Leading on a man you don’t care for is not a praiseworthy action. And even, Miss Everdene, if you seriously inclined towards him, you might have let him find it out in some way of true loving-kindness, and not by sending him a valentine’s letter.”

Bathsheba laid down the shears.

“I cannot allow any man to—to criticize my private conduct!” she exclaimed. “Nor will I for a minute. So you’ll please leave the farm at the end of the week!”

It may have been a peculiarity—at any rate it was a fact—that when Bathsheba was swayed by an emotion of an earthly sort her lower lip trembled: when by a refined emotion, her upper or heavenward one. Her nether lip quivered now.

“Very well, so I will,” said Gabriel calmly. He had been held to her by a beautiful thread which it pained him to spoil by breaking, rather than by a chain he could not break. “I should be even better pleased to go at once,” he added.

“Go at once then, in Heaven’s name!” said she, her eyes flashing at his, though never meeting them. “Don’t let me see your face any more.”

“Very well, Miss Everdene—so it shall be.”

And he took his shears and went away from her in placid dignity, as Moses left the presence of Pharaoh.[cb](#cb_1)

CHAPTER XXI

Troubles in the Fold—A Message

GABRIEL OAK HAD CEASED to feed the Weatherbury flock for about four-and-twenty hours, when on Sunday afternoon the elderly gentlemen Joseph Poorgrass, Matthew Moon, Fray, and half-a-dozen others, came running up to the house of the mistress of the Upper Farm.

“Whatever is the matter, men?” she said, meeting them at the door just as she was coming out on her way to church, and ceasing in a moment from the close compression of her two red lips, with which she had accompanied the exertion of pulling on a tight glove.

“Sixty!” said Joseph Poorgrass.

“Seventy!” said Moon.

“Fifty-nine!” said Susan Tall’s husband.

“—Sheep have broke fence,” said Fray.

“—And got into a field of young clover,” said Tall.

“—Young clover!” said Moon.

“—Clover!” said Joseph Poorgrass.

“And they be getting blasted,”[cc](#cc_1) said Henery Fray.

“That they be,” said Joseph.

“And will all die as dead as nits, if they bain’t got out and cured!” said Tall.

Joseph’s countenance was drawn into lines and puckers by his concern. Fray’s forehead was wrinkled both perpendicularly and crosswise, after the pattern of a portcullis, expressive of a double despair. Laban Tall’s lips were thin, and his face was rigid. Matthew’s jaws sank, and his eyes turned whichever way the strongest muscle happened to pull them.

“Yes,” said Joseph, “and I was sitting at home looking for Ephesians, and says I to myself, ’ ’Tis nothing but Corinthians and Thessalonians in this danged Testament,‘[cd](#cd_1) when who should come in but Henery there: ‘Joseph,’ he said, ’the sheep have blasted theirselves———’”

With Bathsheba it was a moment when thought was speech and speech exclamation. Moreover, she had hardly recovered her equanimity since the disturbance which she had suffered from Oak’s remarks.

“That’s enough—that’s enough!—O you fools!” she cried, throwing the parasol and Prayer-book into the passage, and running out of doors in the direction signified. “To come to me, and not go and get them out directly! O, the stupid numskulls!”

Her eyes were at their darkest and brightest now. Bathsheba’s beauty belonging rather to the demonian than to the angelic school, she never looked so well as when she was angry—and particularly when the effect was heightened by a rather dashing velvet dress, carefully put on before a glass.

All the ancient men ran in a jumbled throng after her to the clover-field, Joseph sinking down in the midst when about half-way like an individual withering in a world which was more and more insupportable. Having once received the stimulus that her presence always gave them they went round among the sheep with a will. The majority of the afflicted animals were lying down, and could not be stirred. These were bodily lifted out, and the others driven into the adjoining field. Here, after the lapse of a few minutes, several more fell down, and lay helpless and livid as the rest.

Bathsheba, with a sad, bursting heart, looked at these primest specimens of her prime flock as they rolled there—

Swoln with wind and the rank mist they drew.†

Many of them foamed at the mouth, their breathing being quick and short, whilst the bodies of all were fearfully distended.

“O, what can I do, what can I do!” said Bathsheba, helplessly. “Sheep are such unfortunate animals!—there’s always something happening to them! I never knew a flock pass a year without getting into some scrape or other.”

“There’s only one way of saving them,” said Tall.

“What way? Tell me quick!”

“They must be pierced in the side with a thing made on purpose.”

“Can you do it? Can I?”

“No, ma‘am. We can’t, nor you neither. It must be done in a particular spot. If ye go to the right or left but an inch you stab the ewe and kill her. Not even a shepherd can do it, as a rule.”

“Then they must die,” she said, in a resigned tone.

“Only one man in the neighbourhood knows the way,” said Joseph, now just come up. “He could cure ’em all if he were here.”

“Who is he? Let’s get him!”

“Shepherd Oak,” said Matthew. “Ah, he’s a clever man in talents!”

“Ah, that he is so!” said Joseph Poorgrass.

“True—he’s the man,” said Laban Tall.

“How dare you name that man in my presence!” she said excitedly. “I told you never to allude to him, nor shall you if you stay with me. Ah!” she added, brightening, “Farmer Boldwood knows!”

“O no, ma‘am,” said Matthew. “Two of his store ewes got into some vetches t’other day, and were just like these. He sent a man on horseback here post-haste for Gable, and Gable went and saved ‘em. Farmer Boldwood hev got the thing they do it with. ’Tis a holler pipe, with a sharp pricker inside. Isn’t it, Joseph?”

“Ay—a holler pipe,” echoed Joseph. “That’s what tis.”

“Ay, sure—that’s the machine,” chimed in Henery Fray reflectively, with an Oriental indifference to the flight of time.

“Well,” burst out Bathsheba, “don’t stand there with your ‘ayes’ and your ’sures,’ talking at me! Get somebody to cure the sheep instantly!”

All then stalked off in consternation, to get somebody as directed, without any idea of who it was to be. In a minute they had vanished through the gate, and she stood alone with the dying flock.

“Never will I send for him—never!” she said firmly.

One of the ewes here contracted its muscles horribly, extended itself, and jumped high into the air. The leap was an astonishing one. The ewe fell heavily, and lay still.

Bathsheba went up to it. The sheep was dead.

“O, what shall I do—what shall I do!” she again exclaimed, wringing her hands. “I won’t send for him. No, I won’t!”

The most vigorous expression of a resolution does not always coincide with the greatest vigour of the resolution itself. It is often flung out as a sort of prop to support a decaying conviction which, whilst strong, required no enunciation to prove it so. The “No, I won’t” of Bathsheba meant virtually, “I think I must.”

She followed her assistants through the gate, and lifted her hand to one of them. Laban answered to her signal.

“Where is Oak staying?”

“Across the valley at Nest Cottage.”

“Jump on the bay mare, and ride across, and say he must return instantly—that I say so.”

Tall scrambled off to the field, and in two minutes was on Poll, the bay, bare-backed, and with only a halter by way of rein. He diminished down the hill.

Bathsheba watched. So did all the rest. Tall cantered along the bridle-path through Sixteen Acres, Sheeplands, Middle Field, The Flats, Cappel’s Piece,[ce](#ce_1) shrank almost to a point, crossed the bridge, and ascended from the valley through Springmead and Whitepits on the other side. The cottage to which Gabriel had retired before taking his final departure from the locality was visible as a white spot on the opposite hill, backed by blue firs. Bathsheba walked up and down. The men entered the field and endeavoured to ease the anguish of the dumb creatures by rubbing them. Nothing availed.

Bathsheba continued walking. The horse was seen descending the hill, and the wearisome series had to be repeated in reverse order: Whitepits, Springmead, Cappel’s Piece, The Flats, Middle Field, Sheeplands, Sixteen Acres. She hoped Tall had had presence of mind enough to give the mare up to Gabriel, and return himself on foot. The rider neared them. It was Tall.

“O what folly!” said Bathsheba.

Gabriel was not visible anywhere.

“Perhaps he is already gone!” she said.

Tall came into the inclosure, and leapt off, his face tragic as Morton’s after the battle of Shrewsbury [cf](#cf_1)

“Well?” said Bathsheba, unwilling to believe that her verbal lettrede-cachet† could possibly have miscarried.

“He says beggars mustn’t be choosers,” replied Laban.

“What!” said the young farmer, opening her eyes and drawing in her breath for an outburst. Joseph Poorgrass retired a few steps behind a hurdle.

“He says he shall not come onless you request en to come civilly and in a proper manner, as becomes any ’ooman begging a favour.”

“Oh, oh, that’s his answer! Where does he get his airs? Who am I, then, to be treated like that? Shall I beg to a man who has begged to me?”

Another of the flock sprang into the air, and fell dead.

The men looked grave, as if they suppressed opinion.

Bathsheba turned aside, her eyes full of tears. The strait she was in through pride and shrewishness could not be disguised longer: she burst out crying bitterly; they all saw it; and she attempted no further concealment.

“I wouldn’t cry about it, miss,” said William Smallbury compassionately. “Why not ask him softer like? I’m sure he’d come then. Gable is a true man in that way.”

Bathsheba checked her grief and wiped her eyes. “O, it is a wicked cruelty to me—it is—it is!” she murmured. “And he drives me to do what I wouldn’t; yes, he does!—Tall, come indoors.”

After this collapse, not very dignified for the head of an establishment, she went into the house, Tall at her heels. Here she sat down and hastily scribbled a note between the small convulsive sobs of convalescence which follow a fit of crying as a ground-swell follows a storm. The note was none the less polite for being written in a hurry. She held it at a distance, was about to fold it, then added these words at the bottom:—

“Do not desert me, Gabriel!”

She looked a little redder in refolding it, and closed her lips, as if thereby to suspend till too late the action of conscience in examining whether such strategy were justifiable. The note was despatched as the message had been, and Bathsheba waited indoors for the result.

It was an anxious quarter of an hour that intervened between the messenger’s departure and the sound of the horse’s tramp again outside. She could not watch this time, but, leaning over the old bureau at which she had written the letter, closed her eyes, as if to keep out both hope and fear.

The case, however, was a promising one. Gabriel was not angry: he was simply neutral, although her first command had been so haughty. Such imperiousness would have damned a little less beauty; and on the other hand, such beauty would have redeemed a little less imperiousness.

She went out when the horse was heard, and looked up. A mounted figure passed between her and the sky, and drew on towards the field of sheep, the rider turning his face in receding. Gabriel looked at her. It was a moment when a woman’s eyes and tongue tell distinctly opposite tales. Bathsheba looked full of gratitude, and she said:—

“O, Gabriel, how could you serve me so unkindly!”

Such a tenderly-shaped reproach for his previous delay was the one speech in the language that he could pardon for not being commendation of his readiness now.

Gabriel murmured a confused reply, and hastened on. She knew from the look which sentence in her note had brought him. Bathsheba followed to the field.

Gabriel was already among the turgid, prostrate forms. He had flung off his coat, rolled up his shirtsleeves, and taken from his pocket the instrument of salvation. It was a small tube or trochar, with a lance passing down the inside; and Gabriel began to use it with a dexterity that would have graced a hospital-surgeon. Passing his hand over the sheep’s left flank, and selecting the proper point, he punctured the skin and rumen[cg](#cg_1) with the lance as it stood in the tube; then he suddenly withdrew the lance, retaining the tube in its place. A current of air rushed up the tube, forcible enough to have extinguished a candle held at the orifice.

It has been said that mere ease after torment is delight for a time; † and the countenances of these poor creatures expressed it now. Forty-nine operations were successfully performed. Owing to the great hurry necessitated by the far-gone state of some of the flock, Gabriel missed his aim in one case, and in one only—striking wide of the mark, and inflicting a mortal blow at once upon the suffering ewe. Four had died; three recovered without an operation. The total number of sheep which had thus strayed and injured themselves so dangerously was fifty-seven.

When the love-led man had ceased from his labours Bathsheba came and looked him in the face.

“Gabriel, will you stay on with me?” she said, smiling winningly, and not troubling to bring her lips quite together again at the end, because there was going to be another smile soon.

“I will,” said Gabriel.

And she smiled on him again.

CHAPTER XXII

The Great Barn and the Sheep-Shearers

MEN THIN AWAY TO insignificance and oblivion quite as often by not making the most of good spirits when they have them as by lacking good spirits when they are indispensable. Gabriel lately, for the first time since his prostration by misfortune, had been independent in thought and vigorous in action to a marked extent—conditions which, powerless without an opportunity as an opportunity without them is barren, would have given him a sure lift upwards when the favourable conjunction should have occurred. But this incurable loitering beside Bathsheba Everdene stole his time ruinously. The spring tides were going by without floating him off, and the neap[ch](#ch_1) might soon come which could not.

It was the first day of June, and the sheep-shearing season culminated, the landscape, even to the leanest pasture, being all health and colour. Every green was young, every pore was open, and every stalk was swollen with racing currents of juice. God was palpably present in the country, and the devil had gone with the world to town. Flossy catkins of the later kinds, fern-sprouts like bishops’ croziers, the square-headed moschatel, the odd cuckoo-pint,—like an apoplectic saint in a niche of malachite,—snow-white ladies’-smocks, the toothwort, approximating to human flesh, the enchanter’s night-shade, and the black-petaled doleful-bells,[7](#7_1) were among the quainter objects of the vegetable world in and about Weatherbury at this teeming time; and of the animal, the metamorphosed figures of Mr. Jan Coggan, the master-shearer; the second and third shearers, who travelled in the exercise of their calling, and do not require definition by name; Henery Fray the fourth shearer, Susan Tall’s husband the fifth, Joseph Poorgrass the sixth, young Cain Ball as assistant-shearer, and Gabriel Oak as general supervisor. None of these were clothed to any extent worth mentioning, each appearing to have hit in the matter of raiment the decent mean between a high and low caste Hindoo. An angularity of lineament, and a fixity of facial machinery in general, proclaimed that serious work was the order of the day.

They sheared in the great barn, called for the nonce the Shearing-barn, which on ground-plan resembled a church with transepts. It not only emulated the form of the neighbouring church of the parish, but vied with it in antiquity. Whether the barn had ever formed one of a group of conventual[ci](#ci_1) buildings nobody seemed to be aware; no trace of such surroundings remained. The vast porches at the sides, lofty enough to admit a waggon laden to its highest with corn in the sheaf, were spanned by heavy-pointed arches of stone, broadly and boldly cut, whose very simplicity was the origin of a grandeur not apparent in erections where more ornament has been attempted. The dusky, filmed, chestnut roof, braced and tied in by huge collars, curves, and diagonals, was far nobler in design, because more wealthy in material, than nine-tenths of those in our modern churches. Along each side wall was a range of striding buttresses, throwing deep shadows on the spaces between them, which were perforated by lancet openings, † combining in their proportions the precise requirements both of beauty and ventilation.

One could say about this barn, what could hardly be said of either the church or the castle, akin to it in age and style, that the purpose which had dictated its original erection was the same with that to which it was still applied. Unlike and superior to either of those two typical remnants of mediævalism, the old barn embodied practices which had suffered no mutilation at the hands of time. Here at least the spirit of the ancient builders was at one with the spirit of the modern beholder. Standing before this abraded pile, the eye regarded its present usage, the mind dwelt upon its past history, with a satisfied sense of functional continuity throughout—a feeling almost of gratitude, and quite of pride, at the permanence of the idea which had heaped it up. The fact that four centuries had neither proved it to be founded on a mistake, inspired any hatred of its purpose, nor given rise to any reaction that had battered it down, invested this simple grey effort of old minds with a repose, if not a grandeur, which a too curious reflection was apt to disturb in its ecclesiastical and military compeers. For once mediævalism and modernism had a common standpoint. The lanceolate[cj](#cj_1) windows, the time-eaten arch-stones and chamfers,† the orientation of the axis, the misty chestnut work of the rafters, referred to no exploded fortifying art or worn-out religious creed. The defence and salvation of the body by daily bread is still a study, a religion, and a desire.

To-day the large side doors were thrown open towards the sun to admit a bountiful light to the immediate spot of the shearers’ operations, which was the wood threshing-floor in the centre, formed of thick oak, black with age and polished by the beating of flails for many generations, till it had grown as slippery and as rich in hue as the state-room floors of an Elizabethan mansion. Here the shearers knelt, the sun slanting in upon their bleached shirts, tanned arms, and the polished shears they flourished, causing these to bristle with a thousand rays strong enough to blind a weak-eyed man. Beneath them a captive sheep lay panting, quickening its pants as misgiving merged in terror, till it quivered like the hot landscape outside.

This picture of to-day in its frame of four hundred years ago did not produce that marked contrast between ancient and modern which is implied by the contrast of date. In comparison with cities, Weatherbury was immutable. The citizen’s Then is the rustic’s Now. In London, twenty or thirty years ago are old times; in Paris ten years, or five; in Weatherbury three or four score years were included in the mere present, and nothing less than a century set a mark on its face or tone. Five decades hardly modified the cut of a gaiter, the embroidery of a smock-frock, by the breadth of a hair. Ten generations failed to alter the turn of a single phrase. In these Wessex nooks the busy outsider’s ancient times are only old; his old times are still new; his present is futurity

So the barn was natural to the shearers, and the shearers were in harmony with the barn.

The spacious ends of the building, answering ecclesiastically to nave and chancel[ck](#ck_1) extremities, were fenced off with hurdles, the sheep being all collected in a crowd within these two enclosures; and in one angle a catching-pen was formed, in which three or four sheep were continuously kept ready for the shearers to seize without loss of time. In the background, mellowed by tawny shade, were the three women, Maryann Money, and Temperance and Soberness Miller, gathering up the fleeces and twisting ropes of wool with a wimble for tying them round. They were indifferently well assisted by the old maltster, who, when the malting season from October to April had passed, made himself useful upon any of the bordering farm-steads.

Behind all was Bathsheba, carefully watching the men to see that there was no cutting or wounding through carelessness, and that the animals were shorn close. Gabriel, who flitted and hovered under her bright eyes like a moth, did not shear continuously, half his time being spent in attending to the others and selecting the sheep for them. At the present moment he was engaged in handing round a mug of mild liquor, supplied from a barrel in the corner, and cut pieces of bread and cheese.

Bathsheba, after throwing a glance here, a caution there, and lecturing one of the younger operators who had allowed his last finished sheep to go off among the flock without re-stamping it with her initials, came again to Gabriel, as he put down the luncheon to drag a frightened ewe to his shear-station, flinging it over upon its back with a dexterous twist of the arm. He lopped off the tresses about its head, and opened up the neck and collar, his mistress quietly looking on.

“She blushes at the insult,” murmured Bathsheba, watching the pink flush which arose and overspread the neck and shoulders of the ewe where they were left bare by the clicking shears—a flush which was enviable, for its delicacy, by many queens of coteries, and would have been creditable, for its promptness, to any woman in the world.

Poor Gabriel’s soul was fed with a luxury of content by having her over him, her eyes critically regarding his skilful shears, which apparently were going to gather up a piece of the flesh at every close, and yet never did so. Like Guildenstern, Oak was happy in that he was not over happy.[cl](#cl_1) He had no wish to converse with her: that his bright lady and himself formed one group, exclusively their own, and containing no others in the world, was enough.

So the chatter was all on her side. There is a loquacity that tells nothing, which was Bathsheba’s; and there is a silence which says much: that was Gabriel’s. Full of this dim and temperate bliss he went on to fling the ewe over upon her other side, covering her head with his knee, gradually running the shears line after line round her dewlap, thence about her flank and back, and finishing over the tail.

“Well done, and done quickly!” said Bathsheba, looking at her watch as the last snip resounded.

“How long, miss?” said Gabriel, wiping his brow.

“Three-and-twenty minutes and a half since you took the first lock from its forehead. It is the first time that I have ever seen one done in less than half an hour.”

The clean, sleek creature arose from its fleece—how perfectly like Aphrodite rising from the foam† should have been seen to be realized—looking startled and shy at the loss of its garment, which lay on the floor in one soft cloud, united throughout, the portion visible being the inner surface only, which, never before exposed, was white as snow, and without flaw or blemish of the minutest kind.

“Cain Ball!”

“Yes, Mister Oak; here I be!”

Cainy now runs forward with the tar-pot. “B. E.” is newly stamped upon the shorn skin, and away the simple dam leaps, panting, over the board into the shirtless flock outside. Then up comes Maryann; throws the loose locks into the middle of the fleece, rolls it up, and carries it into the background as three-and-a-half pounds of unadulterated warmth for the winter enjoyment of persons unknown and far away, who will, however, never experience the superlative comfort derivable from the wool as it here exists, new and pure—before the unctuousness of its nature whilst in a living state has dried, stiffened, and been washed out—rendering it just now as superior to anything woollen as cream is superior to milk-and-water.

But heartless circumstance could not leave entire Gabriel’s happiness of this morning. The rams, old ewes, and two-shear ewes had duly undergone their stripping, and the men were proceeding with the shearlings and hogs,[cm](#cm_1) when Oak’s belief that she was going to stand pleasantly by and time him through another performance was painfully interrupted by Farmer Boldwood’s appearance in the extremest corner of the barn. Nobody seemed to have perceived his entry, but there he certainly was. Boldwood always carried with him a social atmosphere of his own, which everybody felt who came near him; and the talk, which Bathsheba’s presence had somewhat suppressed, was now totally suspended.

He crossed over towards Bathsheba, who turned to greet him with a carriage of perfect ease. He spoke to her in low tones, and she instinctively modulated her own to the same pitch, and her voice ultimately even caught the inflection of his. She was far from having a wish to appear mysteriously connected with him; but woman at the impressionable age gravitates to the larger body not only in her choice of words, which is apparent every day, but even in her shades of tone and humour when the influence is great.

What they conversed about was not audible to Gabriel, who was too independent to get near, though too concerned to disregard. The issue of their dialogue was the taking of her hand by the courteous farmer to help her over the spreading-board† into the bright June sunlight outside. Standing beside the sheep already shorn, they went on talking again. Concerning the flock? Apparently not. Gabriel theorized, not without truth, that in quiet discussion of any matter within reach of the speakers’ eyes, these are usually fixed upon it. Bathsheba demurely regarded a contemptible straw lying upon the ground, in a way which suggested less ovine criticism than womanly embarrassment. She became more or less red in the cheek, the blood wavering in uncertain flux and reflux over the sensitive space between ebb and flood. Gabriel sheared on, constrained and sad.

She left Boldwood’s side, and he walked up and down alone for nearly a quarter of an hour. Then she reappeared in her new riding-habit of myrtle-green, which fitted her to the waist as a rind fits its fruit; and young Bob Coggan led on her mare, Boldwood fetching his own horse from the tree under which it had been tied.

Oak’s eyes could not forsake them; and in endeavouring to continue his shearing at the same time that he watched Boldwood’s manner, he snipped the sheep in the groin. The animal plunged; Bathsheba instantly gazed towards it, and saw the blood.

“O Gabriel!” she exclaimed, with severe remonstrance, “you who are so strict with the other men—see what you are doing yourself! ”

To an outsider there was not much to complain of in this remark; but to Oak, who knew Bathsheba to be well aware that she herself was the cause of the poor ewe’s wound, because she had wounded the ewe’s shearer in a still more vital part, it had a sting which the abiding sense of his inferiority to both herself and Boldwood was not calculated to heal. But a manly resolve to recognize boldly that he had no longer a lover’s interest in her, helped him occasionally to conceal a feeling.

“Bottle!” he shouted, in an unmoved voice of routine. Cainy Ball ran up, the wound was anointed, and the shearing continued.

Boldwood gently tossed Bathsheba into the saddle, and before they turned away she again spoke out to Oak with the same dominative and tantalizing graciousness.

“I am going now to see Mr. Boldwood’s Leicesters.[cn](#cn_1) Take my place in the barn, Gabriel, and keep the men carefully to their work.”

The horses’ heads were put about, and they trotted away.

Boldwood’s deep attachment was a matter of great interest among all around him; but, after having been pointed out for so many years as the perfect exemplar of thriving bachelorship, his lapse was an anticlimax somewhat resembling that of St. John Long’s death by consumption[co](#co_1) in the midst of his proofs that it was not a fatal disease.

“That means matrimony,” said Temperance Miller, following them out of sight with her eyes.

“I reckon that’s the size o’t,” said Coggan, working along without looking up.

“Well, better wed over the mixen than over the moor,”† said Laban Tall, turning his sheep.

Henery Fray spoke, exhibiting miserable eyes at the same time: “I don’t see why a maid should take a husband when she’s bold enough to fight her own battles, and don’t want a home; for ‘tis keeping another woman out. But let it be, for ’tis a pity he and she should trouble two houses.”

As usual with decided characters, Bathsheba invariably provoked the criticism of individuals like Henery Fray. Her emblazoned fault was to be too pronounced in her objections, and not sufficiently overt in her likings. We learn that it is not the rays which bodies absorb, but those which they reject, that give them the colours they are known by; and in the same way people are specialized by their dislikes and antagonisms, whilst their goodwill is looked upon as no attribute at all.

Henery continued in a more complaisant mood: “I once hinted my mind to her on a few things, as nearly as a battered frame dared to do so to such a froward‡ piece. You all know, neighbours, what a man I be, and how I come down with my powerful words when my pride is boiling wi’ scarn?”

“We do, we do, Henery.”

“So I said, ‘Mistress Everdene, there’s places empty, and there’s gifted men willing; but the spite’—no, not the spite—I didn’t say spite—‘but the villainy of the contrarikind,’ I said (meaning womankind), ‘keeps ’em out.’ That wasn’t too strong for her, say?”

“Passably well put.”

“Yes; and I would have said it, had death and salvation overtook me for it. Such is my spirit when I have a mind.”

“A true man, and proud as a lucifer.”

“You see the artfulness? Why, ‘twas about being baily really; but I didn’t put it so plain that she could understand my meaning, so I could lay it on all the stronger. That was my depth! ... However, let her marry an she will. Perhaps ’tis high time. I believe Farmer Boldwood kissed her behind the spear-bed[cp](#cp_1) at the sheep-washing t’other day—that I do.”

“What a lie!” said Gabriel.

“Ah, neighbour Oak—how’st know?” said Henery mildly.

“Because she told me all that passed,” said Oak, with a pharisaical sense that he was not as other shearers in this matter.†

“Ye have a right to believe it,” said Henery, with dudgeon; “a very true right. But I mid‡ see a little distance into things! To be long-headed enough for a baily’s place is a poor mere trifle—yet a trifle more than nothing. However, I look round upon life quite cool. Do you heed me, neighbours? My words, though made as simple as I can, mid be rather deep for some heads.”

“O yes, Henery, we quite heed ye.”

“A strange old piece, goodmen—whirled about from here to yonder, as if I were nothing! A little warped, too. But I have my depths; ha, and even my great depths! I might gird§ at a certain shepherd, brain to brain. But no—0 no!”

“A strange old piece, ye say!” interposed the maltster, in a querulous voice. “At the same time ye be no old man worth naming—no old man at all. Yer teeth bain’t half gone yet; and what’s a old man’s standing if so be his teeth bain’t gone? Weren’t I stale in wedlock afore ye were out of arms? ‘Tis a poor thing to be sixty, when there’s people far past four-score—a boast weak as water.”

It was the unvarying custom in Weatherbury to sink minor differences when the maltster had to be pacified.

“Weak as water! yes,” said Jan Coggan. “Malter, we feel ye to be a wonderful veteran man, and nobody can gainsay it.”

“Nobody,” said Joseph Poorgrass. “Ye be a very rare old spectacle, malter, and we all admire ye for that gift.”

“Ay, and as a young man, when my senses were in prosperity, I was likewise liked by a good-few who knowed me,” said the maltster.

“‘Ithout doubt you was—’ithout doubt.”

The bent and hoary man was satisfied, and so apparently was Henery Fray. That matters should continue pleasant Maryann spoke, who, what with her brown complexion, and the working wrapper of rusty linsey,[cq](#cq_1) had at present the mellow hue of an old sketch in oils—notably some of Nicholas Poussin’s:—†

“Do anybody know of a crooked man, or a lame, or any secondhand fellow at all that would do for poor me?” said Maryann. “A perfect one I don’t expect to get at my time of life. If I could hear of such a thing ’twould do me more good than toast and ale.”

Coggan furnished a suitable reply. Oak went on with his shearing, and said not another word. Pestilent moods had come, and teased away his quiet. Bathsheba had shown indications of anointing him above his fellows by installing him as the bailiff that the farm imperatively required. He did not covet the post relatively to the farm: in relation to herself, as beloved by him and unmarried to another, he had coveted it. His readings of her seemed now to be vapoury and indistinct. His lecture to her was, he thought, one of the absurdest mistakes. Far from coquetting with Boldwood, she had trifled with himself in thus feigning that she had trifled with another. He was inwardly convinced that, in accordance with the anticipations of his easy-going and worse-educated comrades, that day would see Boldwood the accepted husband of Miss Everdene. Gabriel at this time of his life had outgrown the instinctive dislike which every Christian boy has for reading the Bible, perusing it now quite frequently, and he inwardly said, “’I find more bitter than death the woman whose heart is snares and nets!’ ”‡ This was mere exclamation—the froth of the storm. He adored Bathsheba just the same.

“We workfolk shall have some lordly junketing to-night,” said Cainy Ball, casting forth his thoughts in a new direction. “This morning I see ’em making the great puddens in the milking-pails—lumps of fat as big as yer thumb, Mister Oak! I’ve never seed such splendid large knobs of fat before in the days of my life—they never used to be bigger than a horse-bean. And there was a great black crock upon the brandise[cr](#cr_1) with his legs a-sticking out, but I don’t know what was in within.”

“And there’s two bushels of biffins† for apple-pies,” said Maryann.

“Well, I hope to do my duty by it all,” said Joseph Poorgrass, in a pleasant, masticating manner of anticipation. “Yes; victuals and drink is a cheerful thing, and gives nerves to the nerveless, if the form of words may be used. ’Tis the gospel of the body, without which we perish, so to speak it.”

CHAPTER XXIII

Eventide—A Second Declaration

FOR THE SHEARING-SUPPER A long table was placed on the grass-plot beside the house, the end of the table being thrust over the sill of the wide parlour window and a foot or two into the room. Miss Everdene sat inside the window, facing down the table. She was thus at the head without mingling with the men.

This evening Bathsheba was unusually excited, her red cheeks and lips contrasting lustrously with the mazy skeins of her shadowy hair. She seemed to expect assistance, and the seat at the bottom of the table was at her request left vacant until after they had begun the meal. She then asked Gabriel to take the place and the duties appertaining to that end, which he did with great readiness.

At this moment Mr. Boldwood came in at the gate, and crossed the green to Bathsheba at the window. He apologized for his lateness: his arrival was evidently by arrangement.

“Gabriel,” said she, “will you move again, please, and let Mr. Boldwood come there?”

Oak moved in silence back to his original seat.

The gentleman-farmer was dressed in cheerful style, in a new coat and white waistcoat, quite contrasting with his usual sober suits of grey. Inwardly, too, he was blithe, and consequently chatty to an exceptional degree. So also was Bathsheba now that he had come, though the uninvited presence of Pennyways, the bailiff who had been dismissed for theft, disturbed her equanimity for a while.

Supper being ended, Coggan began on his own private account, without reference to listeners:—

I’ve lost my love, and I care not,

I’ve lost my love, and I care not;

I shall soon have another

That’s better than t’other;

I’ve lost my love, and I care not.[cs](#cs_1)

This lyric, when concluded, was received with a silently appreciative gaze at the table, implying that the performance, like a work by those established authors who are independent of notices in the papers, was a well-known delight which required no applause.

“Now, Master Poorgrass, your song!” said Coggan.

“I be all but in liquor, and the gift is wanting in me,” said Joseph, diminishing himself.

“Nonsense; wou‘st never be so ungrateful, Joseph—never!” said Coggan, expressing hurt feelings by an inflection of voice. “And mistress is looking hard at ye, as much as to say, ’Sing at once, Joseph Poorgrass.’”

“Faith, so she is; well, I must suffer it! ... Just eye my features, and see if the tell-tale blood overheats me much, neighbours?”

“No, yer blushes be quite reasonable,” said Coggan.

“I always tries to keep my colours from rising when a beauty’s eyes get fixed on me,” said Joseph diffidently; “but if so be ’tis willed they do, they must.”

“Now, Joseph, your song, please,” said Bathsheba from the window.

“Well, really, ma’am,” he replied in a yielding tone, “I don’t know what to say. It would be a poor plain ballet† of my own composure.”

“Hear, hear!” said the supper-party.

Poorgrass, thus assured, trilled forth a flickering yet commendable piece of sentiment, the tune of which consisted of the keynote and another, the latter being the sound chiefly dwelt upon. This was so successful that he rashly plunged into a second in the same breath, after a few false starts:—

I sow‘-ed th’-e .....

I sow’-ed ....

I sow‘-ed the’-e seeds’ of ‘love’,

I-it was’ all‘i’-in the‘-e spring’,

I-inA‘-pril’, Ma‘-ay, a’-nd sun‘-ny’June’,

When sma‘-all bi’-irds they’ do’ sing.[ct](#ct_1)

“Well put out of hand,” said Coggan, at the end of the verse. “’They do sing’ was a very taking paragraph.”

“Ay; and there was a pretty place at ‘seeds of love,’ and ‘twas well heaved out. Though ’love’ is a nasty high corner when a man’s voice is getting crazed. Next verse, Master Poorgrass.”

But during this rendering young Bob Coggan exhibited one of those anomalies which will afflict little people when other persons are particularly serious: in trying to check his laughter, he pushed down his throat as much of the tablecloth as he could get hold of, when, after continuing hermetically sealed for a short time, his mirth burst out through his nose. Joseph perceived it, and with hectic cheeks of indignation instantly ceased singing. Coggan boxed Bob’s ears immediately.

“Go on, Joseph—go on, and never mind the young scamp,” said Coggan. “’Tis a very catching ballet. Now then again—the next bar; I’ll help ye to flourish up the shrill notes where yer wind is rather wheezy:—

O the wi‘-il-lo’-ow tree‘will’twist’,

And the wil‘-low’ tre’-ee wi‘-ill twine’.

But the singer could not be set going again. Bob Coggan was sent home for his ill manners, and tranquillity was restored by Jacob Smallbury, who volunteered a ballad as inclusive and interminable as that with which the worthy toper old Silenus amused on a similar occasion the swains Chromis and Mnasylus,† and other jolly dogs of his day.

It was still the beaming time of evening, though night was stealthily making itself visible low down upon the ground, the westernlines of light raking the earth without alighting upon it to any extent, or illuminating the dead levels at all. The sun had crept round the tree as a last effort before death, and then began to sink, the shearers’ lower parts becoming steeped in embrowning twilight, whilst their heads and shoulders were still enjoying day, touched with a yellow of self-sustained brilliancy that seemed inherent rather than acquired.

The sun went down in an ochreous mist; but they sat, and talked on, and grew as merry as the gods in Homer’s heaven. Bathsheba still remained enthroned inside the window, and occupied herself in knitting, from which she sometimes looked up to view the fading scene outside. The slow twilight expanded and enveloped them completely before the signs of moving were shown.

Gabriel suddenly missed Farmer Boldwood from his place at the bottom of the table. How long he had been gone Oak did not know; but he had apparently withdrawn into the encircling dusk. Whilst he was thinking of this Liddy brought candles into the back part of the room overlooking the shearers, and their lively new flames shone down the table and over the men, and dispersed among the green shadows behind. Bathsheba’s form, still in its original position, was now again distinct between their eyes and the light, which revealed that Boldwood had gone inside the room, and was sitting near her.

Next came the question of the evening. Would Miss Everdene sing to them the song she always sang so charmingly—“The Banks of Allan Water”[cu](#cu_1)—before they went home?

After a moment’s consideration Bathsheba assented, beckoning to Gabriel, who hastened up into the coveted atmosphere.

“Have you brought your flute?” she whispered.

“Yes, miss.”

“Play to my singing, then.”

She stood up in the window-opening, facing the men, the candles behind her. Gabriel on her right hand, immediately outside the sash-frame. Boldwood had drawn up on her left, within the room. Her singing was soft and rather tremulous at first, but it soon swelled to a steady clearness. Subsequent events caused one of the verses to be remembered for many months, and even years, by more than one of those who were gathered there:—

For his bride a soldier sought her,

And a winning tongue had he:

On the banks of Allan Water

None was gay as she!

In addition to the dulcet piping of Gabriel’s flute Boldwood supplied a bass in his customary profound voice, uttering his notes so softly, however, as to abstain entirely from making anything like an ordinary duet of the song; they rather formed a rich unexplored shadow, which threw her tones into relief. The shearers reclined against each other as at suppers in the early ages of the world, and so silent and absorbed were they that her breathing could almost be heard between the bars; and at the end of the ballad, when the last tone loitered on to an inexpressible close, there arose that buzz of pleasure which is the attar of applause.

It is scarcely necessary to state that Gabriel could not avoid noting the farmer’s bearing to-night towards their entertainer. Yet there was nothing exceptional in his actions beyond what appertained to his time of performing them. It was when the rest were all looking away that Boldwood observed her; when they regarded her he turned aside; when they thanked or praised he was silent; when they were inattentive he murmured his thanks. The meaning lay in the difference between actions none of which had any meaning of itself; and the necessity of being jealous, which lovers are troubled with, did not lead Oak to underestimate these signs.

Bathsheba then wished them good-night, withdrew from the window, and retired to the back part of the room. Boldwood thereupon closing the sash and the shutters, and remaining inside with her. Oak wandered away under the quiet and scented trees. Recovering from the softer impressions produced by Bathsheba’s voice, the shearers rose to leave, Coggan turning to Pennyways as he pushed back the bench to pass out:—

“I like to give praise where praise is due, and the man deserves it—that ’a do so,” he remarked, looking at the worthy thief as if he were the masterpiece of some world-renowned artist.

“I’m sure I should never have believed it if we hadn’t proved it, so to allude,” hiccupped Joseph Poorgrass, “that every cup, every one of the best knives and forks, and every empty bottle be in their place as perfect now as at the beginning, and not one stole at all.”

“I’m sure I don’t deserve half the praise you give me,” said the virtuous thief grimly.

“Well, I’ll say this for Pennyways,” added Coggan, “that whenever he do really make up his mind to do a noble thing in the shape of a good action, as I could see by his face he did to-night afore sitting down, he’s generally able to carry it out. Yes, I’m proud to say, neighbours, that he’s stole nothing at all.”

“Well, ’tis an honest deed, and we thank ye for it, Pennyways,” said Joseph; to which opinion the remainder of the company subscribed unanimously.

At this time of departure, when nothing more was visible of the inside of the parlour than a thin and still chink of light between the shutters, a passionate scene was in course of enactment there.

Miss Everdene and Boldwood were alone. Her cheeks had lost a great deal of their healthful fire from the very seriousness of her position; but her eye was bright with the excitement of a triumph—though it was a triumph which had rather been contemplated than desired.

She was standing behind a low arm-chair, from which she had just risen, and he was kneeling in it—inclining himself over its back towards her, and holding her hand in both his own. His body moved restlessly, and it was with what Keats daintily calls a too happy happiness. [cv](#cv_1) This unwonted abstraction by love of all dignity from a man of whom it had ever seemed the chief component, was, in its distressing incongruity, a pain to her which quenched much of the pleasure she derived from the proof that she was idolized.

“I will try to love you,” she was saying, in a trembling voice quite unlike her usual self-confidence. “And if I can believe in any way that I shall make you a good wife I shall indeed be willing to marry you. But, Mr. Boldwood, hesitation on so high a matter is honourable in any woman, and I don’t want to give a solemn promise to-night. I would rather ask you to wait a few weeks till I can see my situation better.”

“But you have every reason to believe that then—”

“I have every reason to hope that at the end of the five or six weeks, between this time and harvest, that you say you are going to be away from home, I shall be able to promise to be your wife,” she said firmly. “But remember this distinctly. I don’t promise yet.”

“It is enough; I don’t ask more. I can wait on those dear words. And now, Miss Everdene, good-night!”

“Good-night,” she said graciously—almost tenderly; and Boldwood withdrew with a serene smile.

Bathsheba knew more of him now; he had entirely bared his heart before her, even until he had almost worn in her eyes the sorry look of a grand bird without the feathers that make it grand. She had been awestruck at her past temerity, and was struggling to make amends without thinking whether the sin quite deserved the penalty she was schooling herself to pay. To have brought all this about her ears was terrible; but after a while the situation was not without a fearful joy. The facility with which even the most timid women sometimes acquire a relish for the dreadful when that is amalgamated with a little triumph, is marvellous.

CHAPTER XXIV

The Same Night—The Fir Plantation

AMONG THE MULTIFARIOUS DUTIES which Bathsheba had voluntarily imposed upon herself by dispensing with the services of a bailiff, was the particular one of looking round the homestead before going to bed, to see that all was right and safe for the night. Gabriel had almost constantly preceded her in this tour every evening, watching her affairs as carefully as any specially appointed officer of surveillance could have done; but this tender devotion was to a great extent unknown to his mistress, and as much as was known was somewhat thanklessly received. Women are never tired of bewailing man’s fickleness in love, but they only seem to snub his constancy.

As watching is best done invisibly, she usually carried a dark lantern in her hand, and every now and then turned on the light to examine nooks and corners with the coolness of a metropolitan policeman. This coolness may have owed its existence not so much to her fearlessness of expected danger as to her freedom from the suspicion of any; her worst anticipated discovery being that a horse might not be well bedded, the fowls not all in, or a door not closed.

This night the buildings were inspected as usual, and she went round to the farm paddock. Here the only sounds disturbing the stillness were steady munchings of many mouths, and stentorian breathings from all but invisible noses, ending in snores and puffs like the blowing of bellows slowly. Then the munching would recommence, when the lively imagination might assist the eye to discern a group of pink-white nostrils shaped as caverns, and very clammy and humid on their surfaces, not exactly pleasant to the touch until one got used to them; the mouths beneath having a great partiality for closing upon any loose end of Bathsheba’s apparel which came within reach of their tongues. Above each of these a still keener vision suggested a brown forehead and two staring though not unfriendly eyes, and above all a pair of whitish crescent-shaped horns like two particularly new moons, an occasional stolid “moo!” proclaiming beyond the shade of a doubt that these phenomena were the features and persons of Daisy, Whitefoot, Bonny-lass, Jolly-O, Spot, Twinkle-eye, etc., etc.—the respectable dairy of Devon cows belonging to Bathsheba aforesaid.

Her way back to the house was by a path through a young plantation of tapering firs, which had been planted some years earlier to shelter the premises from the north wind. By reason of the density of the interwoven foliage overhead it was gloomy there at cloudless noontide, twilight in the evening, dark as midnight at dusk, and black as the ninth plague of Egypt at midnight.[cw](#cw_1) To describe the spot is to call it a vast, low, naturally formed hall, the plumy ceiling of which was supported by slender pillars of living wood, the floor being covered with a soft dun carpet of dead spikelets and mildewed cones, with a tuft of grassblades here and there.

This bit of the path was always the crux of the night’s ramble, though, before starting, her apprehensions of danger were not vivid enough to lead her to take a companion. Slipping along here covertly as Time, Bathsheba fancied she could hear footsteps entering the track at the opposite end. It was certainly a rustle of footsteps. Her own instantly fell as gently as snowflakes. She reassured herself by a remembrance that the path was public, and that the traveller was probably some villager returning home; regretting, at the same time, that the meeting should be about to occur in the darkest point of her route, even though only just outside her own door.

The noise approached, came close, and a figure was apparently on the point of gliding past her when something tugged at her skirt and pinned it forcibly to the ground. The instantaneous check nearly threw Bathsheba off her balance. In recovering she struck against warm clothes and buttons.

“A rum start, upon my soul!” said a masculine voice, a foot or so above her head. “Have I hurt you, mate?”

“No,” said Bathsheba, attempting to shrink away.

“We have got hitched together somehow, I think.”

“Yes.”

“Are you a woman?”

“Yes.”

“A lady, I should have said.”

“It doesn’t matter.”

“I am a man.”

“Oh!”

Bathsheba softly tugged again, but to no purpose.

“Is that a dark lantern you have? I fancy so,” said the man.

“Yes.”

“If you’ll allow me I’ll open it, and set you free.”

A hand seized the lantern, the door was opened, the rays burst out from their prison, and Bathsheba beheld her position with astonishment.

The man to whom she was hooked was brilliant in brass and scarlet. He was a soldier. His sudden appearance was to darkness what the sound of a trumpet is to silence. Gloom, the genius loci[cx](#cx_1) at all times hitherto, was now totally overthrown, less by the lantern-light than by what the lantern lighted. The contrast of this revelation with her anticipations of some sinister figure in sombre garb was so great that it had upon her the effect of a fairy transformation.

It was immediately apparent that the military man’s spur had become entangled in the gimp† which decorated the skirt of her dress. He caught a view of her face.

“I’ll unfasten you in one moment, miss,” he said, with new-born gallantry.

“O no—I can do it, thank you,” she hastily replied, and stooped for the performance.

The unfastening was not such a trifling affair. The rowel‡ of the spur had so wound itself among the gimp cords in those few moments, that separation was likely to be a matter of time.

He too stooped, and the lantern standing on the ground betwixt them threw the gleam from its open side among the fir-tree needles and the blades of long damp grass with the effect of a large glowworm. It radiated upwards into their faces, and sent over half the plantation gigantic shadows of both man and woman, each dusky shape becoming distorted and mangled upon the tree-trunks till it wasted to nothing.

He looked hard into her eyes when she raised them for a moment; Bathsheba looked down again, for his gaze was too strong to be received point-blank with her own. But she had obliquely noticed that he was young and slim, and that he wore three chevrons[cy](#cy_1) upon his sleeve.

Bathsheba pulled again.

“You are a prisoner, miss; it is no use blinking the matter,” said the soldier drily. “I must cut your dress if you are in such a hurry.”

“Yes—please do!” she exclaimed helplessly.

“It wouldn’t be necessary if you could wait a moment”; and he unwound a cord from the little wheel. She withdrew her own hand, but, whether by accident or design, he touched it. Bathsheba was vexed; she hardly knew why.

His unravelling went on, but it nevertheless seemed coming to no end. She looked at him again.

“Thank you for the sight of such a beautiful face!” said the young sergeant, without ceremony.

She coloured with embarrassment. “’Twas unwillingly shown,” she replied stiffly, and with as much dignity—which was very little—as she could infuse into a position of captivity.

“I like you the better for that incivility, miss,” he said.

“I should have liked—I wish—you had never shown yourself to me by intruding here!” She pulled again, and the gathers of her dress began to give way like liliputian† musketry.

“I deserve the chastisement your words give me. But why should such a fair and dutiful girl have such an aversion to her father’s sex?”

“Go on your way, please.”

“What, Beauty, and drag you after me? Do but look; I never saw such a tangle!”

“O, ’tis shameful of you; you have been making it worse on purpose to keep me here—you have!”

“Indeed, I don’t think so,” said the sergeant, with a merry twinkle.

“I tell you you have!” she exclaimed, in high temper. “I insist upon undoing it. Now, allow me!”

“Certainly, miss; I am not of steel.” He added a sigh which had as much archness in it as a sigh could possess without losing its nature altogether. “I am thankful for beauty, even when ’tis thrown to me like a bone to a dog. These moments will be over too soon!”

She closed her lips in a determined silence.

Bathsheba was revolving in her mind whether by a bold and desperate rush she could free herself at the risk of leaving her skirt bodily behind her. The thought was too dreadful. The dress—which she had put on to appear stately at the supper—was the head and front of her wardrobe; not another in her stock became her so well. What woman in Bathsheba’s position, not naturally timid, and within call of her retainers, would have bought escape from a dashing soldier at so dear a price?

“All in good time; it will soon be done, I perceive,” said her cool friend.

“This trifling provokes, and—and—”

“Not too cruel!”

“—Insults me!”

“It is done in order that I may have the pleasure of apologizing to so charming a woman, which I straightway do most humbly, madam,” he said, bowing low.

Bathsheba really knew not what to say.

“I’ve seen a good many women in my time,” continued the young man in a murmur, and more thoughtfully than hitherto, critically regarding her bent head at the same time; “but I’ve never seen a woman so beautiful as you. Take it or leave it—be offended or like it—I don’t care.”

“Who are you, then, who can so well afford to despise opinion?”

“No stranger. Sergeant Troy. I am staying in this place.—There! it is undone at last, you see. Your light fingers were more eager than mine. I wish it had been the knot of knots, which there’s no untying!”[cz](#cz_1)

This was worse and worse. She started up, and so did he. How to decently get away from him—that was her difficulty now. She sidled off inch by inch, the lantern in her hand, till she could see the redness of his coat no longer.

“Ah, Beauty; good-bye!” he said.

She made no reply, and, reaching a distance of twenty or thirty yards, turned about, and ran indoors.

Liddy had just retired to rest. In ascending to her own chamber, Bathsheba opened the girl’s door an inch or two, and, panting, said—

“Liddy, is any soldier staying in the village—sergeant somebody—rather gentlemanly for a sergeant, and good looking—a red coat with blue facings?”

“No, miss ... No I say; but really it might be Sergeant Troy home on furlough, though I have not seen him. He was here once in that way when the regiment was at Casterbridge.”

“Yes; that’s the name. Had he a moustache—no whiskers or beard?”

“He had.”

“What kind of a person is he?”

“O! miss—I blush to name it—a gay man! But I know him to be very quick and trim, who might have made his thousands, like a squire. Such a clever young dand[da](#da_1) as he is! He’s a doctor’s son by name, which is a great deal; and he’s an earl’s son by nature!”

“Which is a great deal more. Fancy! Is it true?”

“Yes. And he was brought up so well, and sent to Casterbridge Grammar School for years and years. Learnt all languages while he was there; and it was said he got on so far that he could take down Chinese in shorthand; but that I don’t answer for, as it was only reported. However, he wasted his gifted lot, and listed a soldier; but even then he rose to be a sergeant without trying at all. Ah! such a blessing it is to be high-born; nobility of blood will shine out even in the ranks and files. And is he really come home, miss?”

“I believe so. Good-night, Liddy.”

After all, how could a cheerful wearer of skirts be permanently offended with the man? There are occasions when girls like Bathsheba will put up with a great deal of unconventional behaviour. When they want to be praised, which is often; when they want to be mastered, which is sometimes; and when they want no nonsense, which is seldom. Just now the first feeling was in the ascendant with Bathsheba, with a dash of the second. Moreover, by chance or by devilry, the ministrant was antecedently made interesting by being a handsome stranger who had evidently seen better days.

So she could not clearly decide whether it was her opinion that he had insulted her or not.

“Was ever anything so odd!” she at last exclaimed to herself, in her own room. “And was ever anything so meanly done as what I did—to skulk away like that from a man who was only civil and kind!” Clearly she did not think his barefaced praise of her person an insult now.

It was a fatal omission of Boldwood’s that he had never once told her she was beautiful.

CHAPTER XXV

The New Acquaintance Described

IDIOSYNCRASY AND VICISSITUDE HAD combined to stamp Sergeant Troy as an exceptional being.

He was a man to whom memories were an incumbrance, and anticipations a superfluity. Simply feeling, considering, and caring for what was before his eyes, he was vulnerable only in the present. His outlook upon time was as a transient flash of the eye now and then: that projection of consciousness into days gone by and to come, which makes the past a synonym for the pathetic and the future a word for circumspection, was foreign to Troy. With him the past was yesterday; the future, to-morrow; never, the day after.

On this account he might, in certain lights, have been regarded as one of the most fortunate of his order. For it may be argued with great plausibility that reminiscence is less an endowment than a disease, and that expectation in its only comfortable form—that of absolute faith—is practically an impossibility; whilst in the form of hope and the secondary compounds, patience, impatience, resolve, curiosity, it is a constant fluctuation between pleasure and pain.

Sergeant Troy, being entirely innocent of the practice of expectation, was never disappointed. To set against this negative gain there may have been some positive losses from a certain narrowing of the higher tastes and sensations which it entailed. But limitation of the capacity is never recognized as a loss by the loser therefrom: in this attribute moral or aesthetic poverty contrasts plausibly with material, since those who suffer do not mind it, whilst those who mind it soon cease to suffer. It is not a denial of anything to have been always without it, and what Troy had never enjoyed he did not miss; but, being fully conscious that what sober people missed he enjoyed, his capacity, though really less, seemed greater than theirs.

He was moderately truthful towards men, but to women lied like a Cretan[db](#db_1)—a system of ethics above all others calculated to win popularity at the first flush of admission into lively society; and the possibility of the favour gained being transitory had reference only to the future.

He never passed the line which divides the spruce vices from the ugly; and hence, though his morals had hardly been applauded, disapproval of them had frequently been tempered with a smile. This treatment had led to his becoming a sort of regrater† of other men’s gallantries, to his own aggrandizement as a Corinthian,‡ rather than to the moral profit of his hearers.

His reason and his propensities had seldom any reciprocating influence, having separated by mutual consent long ago: thence it sometimes happened that, while his intentions were as honourable as could be wished, any particular deed formed a dark background which threw them into fine relief The sergeant’s vicious phases being the offspring of impulse, and his virtuous phases of cool meditation, the latter had a modest tendency to be oftener heard of than seen.

Troy was full of activity, but his activities were less of a locomotive than a vegetative nature; and, never being based upon any original choice of foundation or direction, they were exercised on whatever object chance might place in their way. Hence, whilst he sometimes reached the brilliant in speech because that was spontaneous, he fell below the commonplace in action, from inability to guide incipient effort. He had a quick comprehension and considerable force of character; but, being without the power to combine them, the comprehension became engaged with trivialities whilst waiting for the will to direct it, and the force wasted itself in useless grooves through unheeding the comprehension.

He was a fairly well-educated man for one of middle class—exceptionally well educated for a common soldier. He spoke fluently and unceasingly. He could in this way be one thing and seem another; for instance, he could speak of love and think of dinner; call on the husband to look at the wife; be eager to pay and intend to owe.

The wondrous power of flattery in passados[dc](#dc_1) at woman is a perception so universal as to be remarked upon by many people almost as automatically as they repeat a proverb, or say that they are Christians and the like, without thinking much of the enormous corollaries which spring from the proposition. Still less is it acted upon for the good of the complemental being alluded to. With the majority such an opinion is shelved with all those trite aphorisms which require some catastrophe to bring their tremendous meanings thoroughly home. When expressed with some amount of reflectiveness it seems co-ordinate with a belief that this flattery must be reasonable to be effective. It is to the credit of men that few attempt to settle the question by experiment, and it is for their happiness, perhaps, that accident has never settled it for them. Nevertheless, that a male dissembler who by deluging her with untenable fictions charms the female wisely, may acquire powers reaching to the extremity of perdition, is a truth taught to many by unsought and wringing occurrences. And some profess to have attained to the same knowledge by experiment as aforesaid, and jauntily continue their indulgence in such experiments with terrible effect. Sergeant Troy was one.

He had been known to observe casually that in dealing with womankind the only alternative to flattery was cursing and swearing. There was no third method. “Treat them fairly, and you are a lost man,” he would say.

This philosopher’s public appearance in Weatherbury promptly followed his arrival there. A week or two after the shearing Bathsheba, feeling a nameless relief of spirits on account of Boldwood’s absence, approached her hayfields and looked over the hedge towards the haymakers. They consisted in about equal proportions of gnarled and flexuous forms, the former being the men, the latter the women, who wore tilt bonnets covered with nankeen,† which hung in a curtain upon their shoulders. Coggan and Mark Clark were mowing in a less forward meadow, Clark humming a tune to the strokes of his scythe, to which Jan made no attempt to keep time with his. In the first mead they were already loading hay, the women raking it into cocks and windrows,[dd](#dd_1) and the men tossing it upon the waggon.
[truncated: 527,463 more chars]
