# Supplementary material
Source: ML conference proceedings conference paper supplement (https://openreview.net/forum?id=Sxi6gBtJcI)
Supplement: supplementary_material [file fight-club-novel.docx]

FIGHT CLUB

Written by

Jim Uhls

Based on the book by Chuck Palahniuk

SCREEN BLACK

JACK (V.O.)

People were always asking me, did I

know Tyler Durden.

FADE IN:

INT. SOCIAL ROOM - TOP FLOOR OF HIGH-RISE - NIGHT

TYLER has the barrel of a HANDGUN lodged in JACK'S MOUTH. They struggle intensely.

They are both around 30; Tyler is blond, handsome, eyes burning with frightening intensity; and JACK, brunette, is appealing in a dry sort of way. They are both sweating and disheveled; Jack seems to be losing his will to fight.

TYLER

We won't really die. We'll be

immortal.

JACK

oor -- ee-ee --uh -- aa-i --

JACK (V.O.) (CONT'D)

With a gun barrel between your

teeth, you speak only in vowels.

Jack tongues the barrel to the side of his mouth.

JACK (still distorted) (CONT'D) You're thinking of vampires. Jack tries to get the gun. Tyler keeps control.

JACK (V.O.) (CONT'D)

With my tongue, I can feel the

silencer holes drilled into the

barrel of the gun. Most of the

noise a gunshot makes is expanding

gases. I totally forgot about

Tyler's whole murder-suicide thing

for a second and I wondered how

clean the gun barrel was.

Tyler checks his watch.

TYLER

Three minutes.

Jack turns so that he can see down -- 71 STORIES.

2.

JACK (V.O.)

The building we're standing won't

be here in three minutes.

JACK (V.O.)

You take a 98-percent concentration

of fuming nitric acid and add three

times as much sulfuric in a bathtub

full of ice. Then, glycerin drop-

by- drop. Nitroglycerin. I know

this because Tyler knows this.

Jack manages to SHOVE Tyler away. Then, he leaps onto him and they fall onto a table, then roll off onto the floor. The gun falls and slides. They wrestle with each other, then dash for the gun. Tyler gets there first and grabs the gun. DURING THE ABOVE:

JACK (V.O.)

The Demolitions Committee of

Project Mayhem wrapped the

foundation columns of this building

with blasting gelatin. The primary

charge will blow the base charge,

and this spot Tyler and I are

standing on will be a point in the

sky.

Tyler drags Jack back to the glass wall and forces him to look out at the city skyline.

TYLER

This is our world now. Two

minutes.

JACK (V.O.)

Two minutes to go and I'm wondering

how I got here.

MOVE IN ON JACK'S FACE.

SLOWLY PULL BACK from Jack's face. It's pressed against TWO LARGE BREASTS that belong to.. BOB, a big moose of a man, around 35 years old. Jack is engulfed by Bob's arms in an embrace. Bob weeps openly.

His shoulders inhale themselves up in a long draw, then drop, drop, drop in jerking sobs. Jack gives Bob some squeezes in return, but his face is stone.

JACK (V.O.)

Bob had bitch tits.

PULL BACK TO WIDE ON

3.

INT. HIGH SCHOOL GYMNASIUM - NIGHT

All the men are paired off, hugging each other, talking in emotional tones. Some pairs lean forward, heads pressed ear- to-ear, the way wrestlers stand, locked. Near the door a temporary sign on a stand:

"REMAINING MEN TOGETHER".

JACK (V.O.)

This was a support group for men

with testicular cancer. The big

moosie slobbering all over me was

Bob.

BOB

I owned my own gym. I did product

endorsements.

JACK

You were a six-time champion.

JACK (V.O.) (CONT'D)

Bob, the big cheesebread. Always

told me his life story.

BOB

We're still men.

JACK

Yes. We're men. Men is what we

are.

JACK (V.O.) (CONT'D)

Bob cried. Six months ago, his

testicles were removed. Then

hormone therapy. He developed

bitch tits because his testosterone

was too high and his body upped the

estrogen. That was where my head

fit -- into his sweating tits that

hang enormous, the way we think of

God's as big.

Bob hugs tighter, then looks with empathy into Jack's eyes.

BOB

Maybe it's just seminoma. With

seminoma, you have a hundred

percent survival rate.

The Leader steps forward and signals everyone.

4.

LEADER

Okay. Group hug.

Everyone converges into a cluster with arms thrown around shoulders, making a big mass of sobbing, smiling goodwill.

JACK (V.O.)

No. Wait. Back up. Let me start

earlier.

INT. JACK'S BEDROOM - NIGHT

Jack lies in bed, staring at the ceiling. He hears VOICES from beyond the wall. A FLY buzzes over his face.

He swats at it, missing.

JACK (V.O.)

For six months. I couldn't sleep.

INT. DOCTOR'S OFFICE - DAY

Jack, eyes puffy, face pale, sits before the Doctor, who studies him with bemusement.

DOCTOR

No, you can't die of insomnia.

JACK

Maybe I already died. Look at my

face.

DOCTOR

You need to lighten up.

JACK

Can you give me something?

JACK (V.O.) (CONT'D)

Little red-and-blue Tuinal,

lipstick- red Seconals.

DOCTOR (OVERLAPPING W/ ABOVE)

You need healthy, natural sleep.

Chew valerian root and get more

exercise.

The Doctor ushers Jack to the door. They step into the INT. HALLWAY

Where the Doctor starts moving away from Jack, picking up a chart on a door.

5.

JACK

I'm in pain.

DOCTOR

(facetious)

You want to see pain? Swing by

Meyer High on a Tuesday night and

see the guys with testicular

cancer.

The Doctor moves into the other room. Jack stares after him somberly.

MOVE IN ON JACK'S FACE.

PULL BACK TO

WIDE ON:

INT. HIGH SCHOOL GYMNASIUM - NIGHT

Jack stares at a group of men, including Bob, who are all listening to a group member speak at a lectern. The speaker has death-white skin and sunken eyes -- he's clearly dying.

SPEAKER

I.. wanted to have three kids. Two

boys and a girl. Mindy wanted two

girls and one boy. We never agreed

on anything.

The Speaker cracks a sad smile. Some men chuckle, happy to lighten the mood.

SPEAKER (CONT'D)

Well.. she had her first girl a

month ago.. with her new husband.

Thank God, because she deserves..

The speaker breaks down and WEEPS UNCONTROLLABLY. Jack is riveted. He

barely breathes. CUT TO:

INT. GYM - LATER

A Leader herds people into pairing-off.

LEADER

Find a partner.

Bob starts toward Jack, shuffling his feet. Jack watches him, still moved by his experience, face full of intense empathy.

6.

JACK (V.O.)

The big moosie, his eyes already shrink-wrapped in tears. Knees

together, invisible steps.

Bob takes Jack into an embrace.

JACK (V.O.)

He pancaked down on top of me.

BOB

Two grown kids.. and they won't

return my calls.

JACK (V.O.)

Strangers with this kind of honesty

make me go a big rubbery one.

Jack's face is rapt and sincere. Bob stops talking and breaks into sobbing, putting his head down on Jack's shoulder and completely covering Jack's face.

JACK (V.O.)

Then, I was lost in oblivion --

dark and silent and complete.

Jack's body begins to jerk in sobs. He tightens his arms around Bob.

JACK (V.O.)

This was freedom. Losing all hope

was freedom.

Jack pulls back from Bob. On Bob's chest, there's a WET MASK of Jack's face from how he looked weeping.

JACK (V.O.)

Babies don't sleep this well.

INT. JACKS' BEDROOM - NIGHT

Jack lies sound asleep.

JACK (V.O.)

I became addicted.

INT. SMALL PROTESTANT CHURCH - NIGHT

Jack moves into a "group hug" of sickly people, men and women. In view is a sign by the door "Free and Clear".

JACK (V.O.)

I felt more alive than I've ever

felt.

7.

INT. OFFICE BUILDING BASEMENT - NIGHT

Jack pulls back from a group hug of more sickly people. They pair-off.

Jack stands with a weeping middle-aged WOMAN. He gingerly takes her in his arms, pats her back. He begins to cry along with her. In view is a sign by the door: "Onward and Upward".

JACK (V.O.)

If I didn't say anything, people

assumed the worst. They cried

harder. I cried harder.

INT. CATHOLIC CATHEDRAL - NIGHT

Jack is in an embrace with a YOUNG MAN. They are both weeping.

JACK (V.O.)

I wasn't really dying. I wasn't

host to cancer or parasites; no, I

was the warm little center that the

life of this world crowded around.

INT. PUBLIC BUILDING CONFERENCE ROOM - NIGHT

Everyone settles in their seats and a Leader takes the microphone.

LEADER

Okay, everyone, close your eyes.

Imagine your pain as a white ball

of healing light. Go down your

secret path to your cave and join

up with your power animal.

EXT. ENTRANCE OF CAVE (JACK'S IMAGINATION)

Jack walks up to the entrance and out comes a PENGUIN. The penguin looks at him, smiles.

Slide.

PENGUIN

EXT. STREET - NIGHT

Jack walks out of a doorway, saying goodbye to people. He walks down the sidewalk, his face shining with peace.

8.

JACK (V.O.)

Every evening I died and every

evening I was born. Resurrected.

CUT BACK TO:

INT. HIGH SCHOOL GYMNASIUM - *RESUMING*

Jack still hanging in an embrace with Bob.

JACK (V.O.)

Bob loved me because he thought my

testicles were removed, too. Being

there, my face against his tits,

getting ready to cry -- this was my

vacation.

MARLA SINGER enters. She has short matte black hair and big, dark eyes like a character from Japanese animation.

MARLA

This is cancer, right?

She raises a cigarette to her lips. The men gape at her, dumbfounded.

JACK (V.O.)

And *she* ruined everything.

CUT TO:

INT. HIGH SCHOOL GYMNASIUM - LATER

Everyone paired-off. MOVE THROUGH ROOM and catch snippets of intimate, painful CONVERSATION.

FIND JACK'S FACE as it stares, over Bob's shoulder, eyes full of deep hostility.

JACK (V.O.)

Liar. Faker. Liar.

MOVE THROUGH ROOM, hearing more CONVERSATION.

FIND MARLA'S FACE, over the shoulder of a MAN she's being embraced by, SMOKING, blowing smoke rings.

JACK (V.O.)

This.. chick.. Marla Singer... did

not have testicular cancer. She

had no diseases. She was a liar.

I saw her at "We Shall Overcome,"

my melanoma group Monday night..

9.

INT. SMALL PROTESTANT CHURCH - NIGHT

Marla sits with the group, smoking, while a member speaks. Jack glares at her.

INT. CATHOLIC CATHEDRAL - NIGHT

Everyone sits with eyes closed while a speaker takes them through a meditation. Various COUGHING around the room. Jack's eyes open and he glares at Marla. Her eyes are closed and she's smoking a cigarette.

JACK (V.O.)

... at "Seize The Day," my

tuberculosis group Friday night.

CUT BACK TO:

INT. HIGH SCHOOL GYMNASIUM - RESUMING

Jack continues to glare at Marla. Her eyes briefly catch his, then roll. Another puff of the cigarette.

JACK (V.O.)

Marla -- the big tourist. The

faker. With her there, I was a

faker, too. Her lie reflected my

lie. And all of a sudden, I felt

nothing.

With her there, I couldn't cry.

INT. JACK'S BEDROOM - NIGHT

Jack, fully clothed, lies on top of his bed, holding a cordless phone to his ear. He stares at the ceiling and swats at a fly.

JACK (V.O.)

So, once again, I couldn't sleep.

Jack hears something on the phone. He sits up.

JACK

I've been holding for thirty

minutes.

Spread all over the floor by Jack's feet are INVOICES for CREDIT CARDS.

JACK (CONT'D)

Yes, that's right. Yes, but I

transferred part of my balance to

my Visa to get the lower rate.

(MORE)

10.

JACK (CONT'D)

Oh, wait. No, it wasn't your Visa.

Okay, I transferred all of the

MasterCard.. to.. Look, can I just

come down in person? I live here --

in Wilmington. Yes, all my credit

cards have main headquarters here.

No? Why not? Why can't I speak to

an account rep? No, wait, don't

put me on --

Jack reacts to being put on hold.

INT. BATHROOM - MOMENTS LATER

Jack sits on the toilet. He digs through a magazine rack. IKEA catalogues, Pottery Barn catalogues and more of the kind. Jack opens an IKEA catalog and flips through it.

JACK (V.O.)

I had become a slave to the IKEA

nesting instinct. If I saw

something like the clever Njurunda

coffee tables in the shape of a

lime green Yin and an orange Yang --

Move in on PHOTO of the tables. CUT TO:

INT. JACK'S LIVING ROOM - NIGHT

Completely EMPTY.

JACK (V.O.)

I had to have it.

The Njurunda tables APPEAR.

INSERT - PHOTO OF SOFAS

JACK (V.O.)

The Haparanda sofa group..

INT. JACK'S LIVING ROOM - NIGHT

The sofa group APPEARS.

JACK (V.O.)

... with the orange slip covers by

Erika Pekkari. The Johanneshov

armchair in the Strinne green

stripe pattern.

The armchair APPEARS.

11.

JACK (V.O.)

The Rislampa/Har lamps from wire

and environmentally-friendly

unbleached paper.

The lamp APPEARS.

JACK (V.O.)

The Vild hall clock of galvanized

steel.

The clock APPEARS.

JACK (V.O.)

The Klipsk shelving unit.

The shelving unit APPEARS.

INT. BATHROOM - RESUMING

Jack flips the page of the catalogue to reveal a full-page photo of an entire kitchen and dining room set.

JACK (V.O.)

I would flip and wonder, "What kind

of dining room set *defines* me as

a person?"

Jack drops the catalog down, open to this spread. PAN OVER to the magazine stack -- there's an old, tattered PLAYBOY.

JACK (V.O.)

It used to be Playboys; now --

IKEA.

INT. JACK'S KITCHEN AND DINING ROOM - CONTINUOUS

-- Looking exactly like the photo in the catalogue. Jack walks in with

the cordless phone still glued to his ear.

JACK

I want to transfer my balance to

get a lower interest rate.

Jack looks over the whole kitchen, dining room, and the living room beyond.

JACK (V.O.) (CONT'D)

The things you own, they end up

owning you.

Jack opens a cabinet, takes out a plate.

12.

JACK (V.O.) (CONT'D)

My hand-blown green glass dishes

with the tiny bubbles and

imperfections, proof they were

crafted by the honest, simple, hard-

working indigenous peoples of

wherever.

He rummages through the refrigerator. It's practically empty. Jack takes out a jar of mustard, opens it and uses a butter knife to eat it.

INT. BEDROOM - LATER

Jack lies on the bed, phone still at his ear.

JACK

1. want to talk to a live person.
2. ack reacts, listens, impatiently punches a single number; waits, listens, punches another single number; listens. He rolls over, looks at one of the bills on the floor and punches an entire credit card number.

JACK (V.O.) (CONT'D)

Next support group, after guided

meditation, the white healing ball

of light, after we open our

chakras, when it comes time to hug,

I'm going to grab that little

bitch, Marla Singer, squeeze her

arms down against her sides and

say..

JACK (CONT'D)

Marla, you liar, you big tourist.

Get out.

Jack yawns, rubs his eyes. They stay wide open. He punches another number into the phone. He sees a LEVITATING, STEAMING Starbucks paper coffee cup move from side to side in front of his face.

INT. COPY ROOM - DAY

Jack stands over a copy machine. The Starbucks cup sits on the lid, moving back and forth as the machine makes copies.

JACK (V.O.)

With insomnia, nothing is real.

Everything is far away. Everything

is a copy of a copy of a copy.

Other people make copies, all with Starbucks cups, sipping.

13.

INT. OFFICE AREA - DAY

Floor-to-ceiling glass instead of walls. Industrial low- pile gray carpet. Walls of upholstered plywood. There are four small offices connected by a hallway to one large office.

INT. JACK'S OFFICE - SAME

Jack, sipping from a Starbucks cup, stares blankly at his Starbucks bag on the floor, full of newspapers.

JACK (V.O.)

When deep space exploitation ramps

up, it will be corporations that

name everything. The IBM Stellar

Sphere. The Philip Morris Galaxy.

Planet Starbucks.

Jack looks up as a pudgy MAN in his late thirties, enters. Starbucks cup in hand, pulls up a chair, and slides a stack of reports on Jack's desk. He pats Jack's back in a superficially-friendly way.

PUDGY MAN

I'm going to need you out-of-town a

little more this week. We've got

some "red-flags" to cover.

JACK (V.O.)

It must've been Tuesday. My Boss

was wearing his cornflower-blue

tie.

JACK (listless "management-speak") (CONT'D) You want me to de-prioritize my current reports until you advise of a status upgrade?

PUDGY MAN - "BOSS"

You need to make these your primary

"action items".

JACK (V.O.)

He was full of pep. Must've had

his latte enema.

BOSS

Here's your flight coupons. Call

me from the road if there's any

snags. Your itinerary..

Jack hides a yawn and pretends to listen.

14.

JACK (V.O.)

When you have insomnia, you're

never really awake and you're never

really asleep, either.

INT. SMALL PROTESTANT CHURCH - NIGHT

Jack walks in and joins the crowd.

LEADER

Okay, everyone. Chloe.

Jack catches sight of Marla, scowls at her. Taking the lectern is CHLOE, a pale, sickly girl whose skin stretches yellowish and tight around her bones. She wears a head bandage. OVER the beginning of her SPEECH:

JACK (V.O.)

Chloe looked the way Joni

Mitchell's skeleton would look if

you made it smile and walk around a

party being extra nice to everyone.

CHLOE

My status update is.. I'm still

here -- but I don't know for how

long. That's as much certainty as

they can give me. I'm in a pretty

lonely place. No one will have sex

with me. I'm so close to death and

all I want is to get laid for the

last time. I have pornographic

movies in my apartment, and

lubricants and amyl nitrate..

The LEADER hardly knows what to do. He inches his way to the lectern, and gingerly takes control of the microphone.

LEADER

Thank you, Chloe. Everyone, close

your eyes for meditation. Go to

your cave and find your power

animal.

EXT. ENTRANCE OF CAVE (JACK'S IMAGINATION)

Jack walks up to the entrance and finds MARLA -- smoking a cigarette blowing smoke into his face, rolling her eyes in condescension.

Slide.

MARLA

15.

INT. CHRUCH - RESUMING

Jack's eyes snap open and turn to Marla. He glowers, watching her smoke with her eyes closed.

INT. CHURCH - LATER

The Leader, smiling opens his eyes and looks around the group.

LEADER

Good. Now. Pair off for the one-

on- one. Pick someone special to

you tonight.

Everyone stands and mills about, slowly pairing-off. Jack sees the ghastly spectre of Chloe coming towards him. He smiles at her. She smiles back; it takes her some time to amble to him.

CHLOE

Hello, Cornelius.

JACK (V.O.)

I never gave my real name at

support groups.

CHLOE

I'm showing signs of improvement.

JACK (V.O.)

Everyone was always getting better.

They never said "parasite"; they

said "agent".

She smiles at him with a twisted, dying mouth. Her eyes eerily bright with desperation. Jack's lip trembles as he, in a sincere attempt at levity, chokes out:

JACK

You.. look.. like a pirate.

Chloe laughs, a little too much. Jack squeezes out a laugh. Then, he sees Marla, off by herself. Someone is heading for her. Most people have paired-off. Jack gives a quick nod to Chloe and darts for Marla, grabbing her. Chloe watches in sad surprise.

STAY ON JACK AND MARLA as he drags her off to the periphery. He whispers into her ear.

JACK (CONT'D)

We need to talk.

16.

MARLA

O - *kay*. Sure.

JACK

You're a faker. You aren't dying. Okay, in the brainy brain-food philosophy way, we're all dying. But you're not dying the way Chloe is dying.

LEADER

Tell the other person how you feel.

MARLA

You're not dying, either..

(reading his nametag)

... *Cornelius*.

LEADER

Share yourself completely.

JACK

These are my groups. I found them!

MARLA

I saw you practicing this.

What?

JACK

MARLA

-- Telling me off. Is it going as well as you thought it would?

JACK

I'll expose you!

Go ahead.

MARLA

MEDIATOR

1. et yourself cry.
2. arla puts her head down on Jack's shoulder as if she were crying.

Jack pulls her head back up. She deadpans at him.

JACK

I've put in some serious time on

these groups -- I've been coming

for a year.

17.

MARLA

Must've been tough to pull off.

JACK

Anyone who might've noticed me in

that time has either died or

recovered and never come back.

MARLA

Why do you do it?

JACK

Why do you?

No answer. The Leader passes right by Jack and Marla.

LEADER

Open up. share with each other.

JACK

... If people think you're dying,

they really listen, instead of just

waiting for their turn to speak.

Everything else about credit card

debts and sad radio songs and

thinning hair goes out the window.

MARLA

It started with a lump. I went to

a breast cancer support group. The

lump turned out benign. But I

still needed my Monday fix. So, I

went to lymphoma, just to check it

out. Dying people are so *alive*.

JACK

It becomes an addiction.

Yeah..

MARLA

Jack almost smiles, then turns sullen. He pulls back from her.

LEADER

Now, the closing prayer.

JACK

Look, I can't go to a group with a

faker present.

Marla's mood hardens.

18.

MARLA

Well, I can't either.

LEADER

Oh, bless us and hold us..

JACK

We'll split up the week.

Marla starts out of the room. Jack follows her.

LEADER

... help us and help us.

EXT. CHURCH - NIGHT - CONTINUOUS

Marla gets to the sidewalk, moving quickly along.

JACK

You can have lymphoma, tuberculosis

and --

MARLA

No, you take tuberculosis. My

smoking doesn't go over well.

JACK

I think testicular cancer should be

no contest.

MARLA

You have your balls, don't you?

Technically, *I* have more of a

right to be there than you.

JACK

You're kidding.

MARLA

I don't know -- am I?

JACK FOLLOWS MARLA INTO

INT. LAUNDROMAT - CONTINUOUS

As she walks with authority up to an unwatched DRYER. She takes out all the clothes, sets them on a table and sorts through them, picking out jeans, pants and shirts.

MARLA

I'll take the parasites.

19.

JACK

You can't have *both* parasites.

You take blood parasites and --

MARLA

I want brain parasites.

She opens another dryer and does the same thing again.

JACK

Okay. I'll take blood parasites

and I'll take organic brain

dementia and --

MARLA

I want that.

JACK

You can't have the whole brain!

MARLA

So far, you have four and I have

two!

JACK

Well, then, take blood parasites.

Now, we each have three.

Marla gathers up all the chosen garments and heads back for the door.

She whooshes past Jack.

EXT. SIDEWALK - CONTINUOUS

Jack follows, bewildered.

JACK

You left half your clothes.

HONK! Jack starts. Marla's led him into the street with traffic barreling down. She defiantly stomps in front of the cars, which screech to a halt and blare their horns. Jack dashes across. Marla heads into a THRIFT STORE. Jack follows.

INT. THRIFT STORE - CONTINUOUS

Marla drops all the clothes on a back counter. An old CLERK sifts through the clothes, marks on a pad.

JACK

What are you doing? You're selling

those clothes?

20.

Marla steps down hard on Jack's foot. He jerks, wincing in pain.

MARLA (FOR THE CLERK TO HEAR)

Yes, I'm selling some clothes.

The Clerk starts to ring up the various amounts he's assessed.

MARLA (CONT’D)

So, we each have three -- that's

six. What about the seventh day?

I want ascending bowel cancer.

JACK (V.O.)

The girl had done her homework.

JACK

*I* want ascending bowel cancer.

The Clerk gives Marla and Jack a strange look as he hands over money to Marla.

MARLA

That's your favorite, too? Tried

to slip it by me, huh?

JACK

We'll split it. You get it the

first and third Sunday of the

month.

Deal.

MARLA

They shake hands. Jack starts to withdraw his; Marla holds it.

MARLA (CONT'D)

I guess this is goodbye.

JACK

Let's not make a big deal out of

this.

She walks toward the door. Jack watches her go.

MARLA (NOT LOOKING BACK)

How's this for not making a big

deal?

EXT. SIDEWALK - CONTINUOUS

Jack dashes out and catches up to her.

21.

JACK

Uh, Marla. Should we exchange phone numbers?

Should we?

MARLA

JACK

In case we want to switch nights.

MARLA

Uh-hunh. Sure.

He takes out a business card and a pen. He writes his home number on the back and hands it to her. She takes his pen, grabs his hand and writes her number on his palm. She gives him a quick grin, slaps the pen back into his palm, then saunters out into the middle of the street, causing more screeching of tires and honking. She turns back, holding up the card.

MARLA (CONT'D)

It doesn't have your name on it.

Who are you? Cornelius? Any of

the stupid names you give at group?

Jack starts to yell, but the traffic noise is too loud. Marla just shakes her head at him, turns, and keeps moving away. A bus moves into view and stops, obscuring her.

JACK (V.O.)

Marla's philosophy of life, I later

found out, was that she could die

at any moment. The tragedy of her

life was that she didn't.

INT. AIRPLANE CABIN - DAY

As the plane touches down for landing and the cabin BUMPS, Jack's eyes pop open.

JACK (V.O.)

You wake up at O'Hare.

INT. AIRPLANE CABIN - DAY

Jack snaps awake again, looking around, disoriented.

JACK (V.O.)

You wake up at SeaTac.

22.

EXT. HIGHWAY - DUSK

The rear end of a car is visible sticking up by the side of the road.

Jack stands near the car, marking on a document. The SUN SETS behind him.

INT. AIRPORT - NIGHT

Jack walks up to a gate counter. An ATTENDANT smiles at him.

ATTENDANT

Check-in for that flight doesn't

begin for another two hours, Sir.

Jack looks at his watch, steps away

and looks at an overhanging clock.

His eyes are bleary as he reads it, adjusts his watch.

JACK (V.O.)

Pacific, Mountain, Central. You

lose an hour, you gain an hour.

This is your life, and it's ending

one minute at a time.

INT. AIRPLANE CABIN - DAY

Jack's eyes snap open as the plane LANDS.

JACK (V.O.)

You wake up at Air Harbor

International.

INT. AIRPORT WALKWAY

Jack stands on a conveyor belt, briefcase at his feet, moving slowly with the flow of the belt. His tired eyes watch people on the opposite conveyor belt, moving past him.

JACK (V.O.)

If you wake up at a different time

and a different place, can you be a

different person?

Jack's eyes catch sight of TYLER -- who we recognize from the opening sequence -- on the opposite conveyor belt. They pass each other.

INT. AIRPLANE CABIN - IN FLIGHT - NIGHT

Jack sits next to a BUSINESSMAN. As they have idle CONVERSATION, we MOVE IN ON Jack's fold-out tray.

23.

An ATTENDANT'S HANDS set coffee down with a small packet of sugar and a small container of cream.

JACK (V.O.)

The charm of traveling is:

everywhere I go -- tiny life.

Single-serving sugar, single-serving cream.

CUT TO: THE HANDS PLACE A PLASTIC DINNER TRAY DOWN. JACK OPENS THE various containers.

JACK (V.O.)

Single-serving butter, single-

serving salt. Single-serving

cordon blue.

INT. HOTEL ROOM - BATHROOM - NIGHT

Jack brushes his teeth.

JACK (V.O.)

Single-use toothbrush. Single-

serving mouthwash, single serving

soap.

Jack picks up an individual, wrapped Q-TIP, looks at it. He moves out of the bathroom into

MAIN AREA

And sits on the bed. He turns on

the television. It's tuned to the

"Sheraton Channel" and shows

WAITERS serving people in a large

BANQUET ROOM. Jack stops brushing

his teeth, feels something near him

on the bed, finds it, lifts it.

It's a small MINT.

INT. AIRPLANE CABIN - IN FLIGHT - NIGHT

Jack sits next to a frumpy WOMAN and they chat. Jack turns to look at his food and takes a bite. He turns back and it's

-- a BALD MAN sitting next to him, talking. He takes another bite, TURNS BACK AND IT'S

-- a BUSINESSMAN sitting next to him. He takes another bite, turns BACK, AND IT'S

-- a BUSINESS WOMAN sitting next to him.

24.

JACK (V.O.)

The people I meet on each flight --

they're single-serving *friends*.

Between take-off and landing, we have our time together, then we never see each other again.

INT. AIRPLANE CABIN - LANDING

Jack's eyes snap open.

JACK (V.O.)

You wake up at Logan.

EXT. CONCRETE LOT - DAY

Surrounded by cinderblock walls. Two TECHNICIANS in uniform lead Jack to a WAREHOUSE door. They open it, revealing a BURNT-OUT SHELL of a WRECKED AUTOMOBILE. They move into the

INT. WAREHOUSE - CONTINUOUS

And Jack sets down his briefcase, opens it, and starts to make notes on a FORM.

JACK (V.O.)

I'm a recall coordinator. My job

was to apply the formula. It's

simple arithmetic.

TECHNICIAN #1

Here's where the baby went through

the window. Three points.

JACK (V.O.)

It's a story problem. A new car

built by my company leaves Boston

traveling at 60 miles per hour.

The rear differential locks up.

TECHNICIAN #2

The teenager's braces locked around

the backseat ashtray. Kind makes a

good "anti-smoking" ad.

JACK (V.O.)

The car crashes and burns with

everyone trapped inside. Now: do

we initiate a recall?

25.

TECHNICIAN #1

The father must've been obese. See

how the fat burned into the

driver's seat, mixed with the dye

of his shirt? Kind like modern

art.

JACK (V.O.)

You take the number of vehicles in

the field

(A)

and multiply it by the probable

rate of failure

(B) (CONT’D)

, multiply the result by the

average out-of- court settlement

(C) (CONT’D)

. A times B times C equals X. If

X is less than the cost of a

recall, we don't do one.

INT. AIRPLANE CABIN - TAKING OFF - NIGHT

Next to Jack, a chubby, middle-aged LADY gawks at him, appalled.

LADY

... Which.. car company do you work

for?

JACK

A major one.

Oh.

LADY

Jack turns his attention to the window as the PLANE ASCENDS. The lady's VOICE FADES. Jack sees a PELICAN get SUCKED into the TURBINE.

His face remains bland during the following:

The plane BUCKLES -- the cabin wobbles loosely. People begin to panic.

Oxygen masks fall.

JACK (V.O.)

Life insurance pays off triple if

you die on a business trip.

26.

A forceful IMPACT with the ground and people -- except for Jack --

LURCH FORWARD, some jerking against their seatbelts, magazines and other objects fly forward.

JACK (V.O.)

No more expense accounts, receipt

required for over twenty-five

dollars.

A BALL OF FIRE swoops forward from the rear of the cabin and INCINERATES EVERYTHING AND EVERYBODY -- except Jack, who remains in his same position in his seat, with the bland expression.

JACK (V.O.)

No more haircuts. Nothing matters,

not even bad breath.

DING! -- the seatbelt light goes OUT.

*EVERYTHING IS NORMAL*.

JACK (V.O.)

Always the same fantasy. But -- no

such luck.

Jack's eyes are closed. He seems asleep. From next to him, a VOICE we've heard before.

VOICE

There are three ways to make

napalm. One, mix equal parts of

gasoline and frozen orange juice.

Jack's eyes snap open and he turns to see *Tyler*, who is staring out the window. Without turning to Jack, he continues:

TYLER

Two, mix equal parts of gasoline

and diet cola. Three, dissolve

crumbled cat litter in gasoline

until the mixture is thick.

Jack's smile fades. Tyler turns to him and grins. He reaches down under the seat in front of him and pulls up a briefcase. Jack looks at it with trepidation.

JACK (V.O.)

This is how I met --

27.

Tyler offers his hand, Jack takes it and Tyler squeezes firmly and shakes hands.

TYLER

Tyler Durden. You know why they

have oxygen masks on planes?

JACK

Supply oxygen?

TYLER

That's a sharp answer. The oxygen

gets you high. You're taking in

giant, panicked breaths and,

suddenly, you become euphoric and

docile, and you accept your fate.

Tyler grabs a safety instruction card from the seat pocket and shows Jack the passive faces on the drawn figures. Tyler imitates the face.

Jack laughs; he is completely beguiled.

JACK

What do you do, Tyler?

TYLER

What do you want me to do?

JACK

I mean -- for a living.

TYLER

Why? So you can say, "Oh, *that's*

what you do." -- And be a smug

little shit about it?

Jack laughs. He points to his own briefcase, under the seat in front of him.

JACK

We have the same briefcase.

Tyler pops the latches on his briefcase. A beat, while Jack's expression turns nervous again about what's inside. Tyler swings the lid up, revealing a full bounty of quaintly- wrapped bars of soap.

TYLER

I make and sell soap.

He gives Jack one. Jack takes it, looks it over.

28.

TYLER (CONT'D)

If you add nitric acid to the soap-

making process, you get

nitroglycerin. With enough soap,

you could blow up the world.

Jack now looks at the bar of soap nervously. He looks at Tyler, slowly smiles and shakes his head.

Tyler takes out a blank BOARDING PASS. He takes out a small stencil, scrapes a pencil over it, creating a seat number which looks printed.

Then, he takes out a stamp and ink pad. He stamps the pass.

JACK

Uh.. why are you going to

Wilmington?

TYLER

I live there.

Me, too.

JACK

Tyler shuts his briefcase and stands.

Excuse me.

TYLER

Jack stands, allowing Tyler to pass into the aisle.

JACK

So, uh.. we should hook up

sometime.

Jack hands Tyler a business card. Tyler snatches it, writes down a number, hands it back to Jack.

JACK (CONT'D)

Tyler, you're by far the most

interesting "single-serving" friend

I've ever met.

A beat as Tyler stares at him, deadpan.

Jack, enjoying his own chance to be witty, leans a bit closer to Tyler.

JACK (CONT'D)

You see, when you travel,

everything is --

29.

TYLER

I grasp the concept. You're very clever.

Thank you.

JACK

TYLER

How's that working out for you? --

Being clever.

JACK (THROWN OFF)

Well, uh.. uh.. great.

TYLER

Keep it up, then. Keep it right

up.

Jack sits and watches Tyler walk up to the curtain dividing First Class. Tyler show the bogus boarding pass to an ATTENDANT, who leads him through the curtain.

INT. BAGGAGE CLAIM AREA - WILMINGTON - NIGHT

Utterly empty of baggage, and, except for Jack and a SECURITY TASK FORCE MAN, utterly empty of people; quiet. The Security TFM, smirking, holds a receiver to his ear from an official phone on the wall.

SECURITY TFM (TO JACK)

Throwers don't worry about ticking.

Modern bombs don't tick.

Throwers?

JACK

SECURITY TFM

Baggage handlers. But when a suitcase vibrates, the throwers have to call the police.

JACK

My suitcase was *vibrating*?

SECURITY TFM

Nine times out of ten, it's an electric razor. One out of ten, it's a dildo. Sometimes it's even a *man*. It's airline policy not to imply ownership in the event of a dildo. We gotta use the indefinite article: "*A* dildo".

Never "*Your* dildo".

30.

JACK (V.O.)

I had everything in that bag. Six

white shirts, two black trousers,

six pair underwear, alarm clock,

contact lens stuff, and.. cordless

electric razor.

SECURITY TFM (INTO PHONE)

Yeah? Oh, fuck, now a recording.

The Security TFM punches a few code numbers into the phone, waits.

CUT TO:

EXT. EMPTY RUNWAY - NIGHT

A solitary SUITCASE sits on the concrete.

KABOM! The suitcase explodes. CUT TO:

INT. BAGGAGE CLAIM AREA - RESUMING

The Security TFM still on hold, entertains Jack.

SECURITY TFM (TO JACK)

You know the industry slang for

"flight attendant"? "Air

Mattress".

(into phone)

Yeah? Really?

The Security TFM, turns to Jack, shakes his head, hangs up the phone; shrugs.

EXT. AIRPORT DRIVE - MOMENTS LATER

Jack waits by the curb as a TAXI approaches.

JACK (V.O.)

Things could be worse. A spider

could lay eggs under the skin in

your face and the larva could

tunnel around and baby spiders

could burst from your nostrils.

INT. TAXI - MOVING - NIGHT

Along a residential street. Jack looks ahead, sees a tall grey, bland building on the corner.

31.

JACK (V.O.)

Home was a condo on the fifteenth

floor of a filing cabinet for

widows and young professionals.

The taxi approaches the intersection.

JACK (V.O.)

The walls were solid concrete. A

foot of concrete is important when

your next-door neighbor lets her

hearing aid go and has to watch

game shows at full blast..

The taxi turns a corner and Jack sees the front of the building. A diffuse CLOUD of SMOKE wafts away from a BLOWN- OUT SECTION on the fifteenth floor. FIRETRUCKS, POLICECARS and a MOB are all crowded around the lobby area.

JACK (V.O.)

-- Or when a volcanic blast of

burning gas and debris that used to

be your furniture and personal

effects blows out your floor-to-

ceiling window and sails down

flaming to leave just your condo --

only yours --

a gutted, charred concrete hole in the cliffside of the building.

EXT. STREET IN FRONT OF BUILDING

Jack, gaping at the sight above him, absently gives the Cabbie money.

The taxi pulls away. Jack stands frozen.

JACK (V.O.)

These things happen.

Jack starts toward the building. He enters the fray of people, pushes through to the lobby. The DOORMAN sees him, gives a sad smile, shakes his head. Jack starts for the elevator.

DOORMAN

There's nothing up there.

Jack presses the button; waits. The Doorman moves next to him.

32.

DOORMAN (CONT'D)

You can't go into the unit. Police

orders. They're investigating for

arson.

The elevator doors open. Jack hesitates. The doors close.

DOORMAN (CONT'D)

Do you have someone you can call?

Jack heads back for the lobby doors. The Doorman follows. EXT. CONDO BUILDING - CONTINUOUS

Jack walks past SMOKING, CHARRED DEBRIS -- a flash of ORANGE from the Yang table, a CLOCK FACE from the hall clock, part of an arm from the GREEN ARMCHAIR. His feet CRUNCH glass. He gets to a payphone. The

Doorman stays right with him, watching him. CUT TO:

CLOSE SHOT - JACK'S STOVE

Hissing.

JACK (V.O.)

Later, the police told me someone

could've turned the pilot light

off, turned a burner on.

EXT. PAYPHONE - RESUMING

Jack picks up the receiver, stares at the numbers on the phone.

DOORMAN

A lot of young people try to

impress the world and buy too many

things.

CLOSE SHOT - JACK'S ENTIRE CONDO - KITCHEN AND LIVING ROOM Sound of the HISS.

JACK (V.O.)

The gas then could have slowly

filled the condo from floor to

ceiling in every room. Seventeen-

hundred square feet with high

ceilings for days and days.

EXT. PAYPHONE - RESUMING

Jack's fingers move over the numbers lightly, as he thinks.

33.

DOORMAN

A lot of young people don't know

what they really want.

INSERT - CLOSE ON BASE OF JACK'S REFRIGERATOR

JACK (V.O.)

Then, the refrigerator's compressor

clicked on.

Click. KABLAM! SCREEN GOES WHITE.

EXT. PAYPHONE - RESUMING

Jack digs into his pocket, pulls out his business card, turns it over

-- sees the number Tyler wrote. He dials it. Its rings.. and rings.

He waits.

JACK (V.O.)

Tyler Durden. Rescue me.

DOORMAN

Young people think they want the

whole world.

JACK (V.O.)

Deliver me from Swedish furniture.

Deliver me from clever art.

DOORMAN

If you don't know what you want,

you end up with a lot you don't.

JACK (V.O.)

May I never be content. May I

never be complete. May I never be

perfect. Deliver me.

Jack sighs and hands up the phone. He starts to push past the Doorman when the phone RINGS. Jack grabs it.

Hello?

JACK

TYLER'S VOICE

Who's this?

Tyler?

JACK

34.

EXT. LOU'S TAVERN - NIGHT

A small building, sitting squarely in the middle of a large concrete parking lot. A few street lamps illuminate the lot. a freeway runs nearby.

INT. LOU'S TAVERN - SAME

Jack and Tyler sit at a table in the very back of the room. A half-empty pitcher of beer shows dried foam scum from the previous refill.

Five DRUNKEN GUYS at a table at the opposite side of the bar keep glancing over and chuckling in a potentially hostile manner.

TYLER

You buy furniture. You tell

yourself, this is the last sofa

you'll ever need in your life; no

matter what else goes wrong, you've

got the sofa issue handled. Then

the right set of dishes. Then the

right bed.

The drapes. The rug. This is how you're good to yourself. This is how you fill up your life.

JACK

I.. guess so.

TYLER

And now your condo blows up and you

have nothing.

JACK

I.. guess so.

TYLER

And now you find yourself, sitting

here, feeling like it's the best

thing that ever happened to you.

... yeah.

JACK

TYLER

I don't know you, so maybe I'm wrong. Maybe it's a terrible fucking tragedy.

... no.

JACK

35.

TYLER

I mean, you lost a lot of nice, perfect, neat little shit.

JACK

Fuck it all.

TYLER

Wow. That's pretty strong.

... yeah.

JACK

TYLER

Do you have family you can call?

JACK

My mother would just go into hysterics. My Dad.. Don't know where he is.

JACK (CONT'D)

Only knew him for six years. Then, he ran off to a new city and married another woman and had more kids. Every six years -- new city, new family. He was setting up franchises.

Tyler smiles, snorts, shakes his head.

TYLER

A generation of men raised by women. Look what it's done to you.

To me?

JACK

TYLER

We're on our third pitcher of beer and you still can't ask me.

Huh?

JACK

TYLER

Why don't you cut the shit and ask me if you can stay at my place?

JACK

Well.. uh..

36.

TYLER

Why don't you cut the shit and ask me if you can stay at my place?

JACK

Would that be a problem?

TYLER

Is it a problem for you to ask me?

JACK

Can I stay at your place?

Yeah.

Thanks.

TYLER

JACK

TYLER

-- If you do me one favor.

JACK

What's that?

TYLER

I want you to hit me as hard as you

can.

*FREEZE PICTURE*

JACK (V.O.)

Let me tell you a little bit about

Tyler Durden.

EXTREME CLOSE-UP - FILM FRAME

--And we can see it's a PENIS.

INT. PROJECTIONIST ROOM - THEATRE - NIGHT

Jack, in the foreground, FACES CAMERA. In the BACKGROUND, Tyler sits at a bench, looking at individual FRAMES that have been cut out of movies. Near him, the PROJECTOR rolls a film.

JACK

Tyler works some nights as a

projectionist. A film doesn't come

in one big reel..

Tyler speaks to Jack normally, not to the camera.

37.

TYLER

In an old theatre, two projectors

are used. I have to change

projectors at the exact second so

the audience never sees the break

when one reel starts and one reel

runs out. You can see two dots on

screen at the end of a reel -- this

is the warning.

JACK

He splices single frames of

genitalia from porno movies into

family films.

TYLER

One-twenty-forth of a second.

That's how long the penis flashes

up there. Towering, slippery, red

and terrible, and no one knows

they've seen it.

Jack and Tyler watch the audience of PARENTS and CHILDREN as an ANIMAL adventure MOVIE plays. Suddenly, children start becoming uncomfortable and squirming. Some start CRYING. Some THROW UP.

JACK

Tyler also worked as a..

INT. LARGE BANQUET HALL - NIGHT

Tyler moves the cart around one of many tables, ladling out soup.

Jack stands in the same position. FACING CAMERA.

JACK

... banquet waiter at the luxurious

Pressman Hotel.

The GUESTS are dressed in resplendent clothes, reeking of wealth and privilege. They command the WAITERS with snaps of the finger.

Complaints pop like gunshots. The stiff-necked CATERING MANAGER contemptuously hawk-eyes the waiters. It's hellish.

INT. SERVICE ELEVATOR - NIGHT

Jack turns and WE PAN to Tyler, standing by a CART with a giant SOUP TUREEN and bowls. His hands are at his open fly and he's in position to piss into the soup.

38.

TYLER

Don't watch. I can't if you watch

me.

CAMERA PANS to original position as Jack continues TO CAMERA.

JACK

He was a guerrilla terrorist of the

food service industry.

TYLER (O.S.)

Shit. I can't go.

After a beat, the sound of WATER SPLASHING the floor. Jack peeks and sees Tyler pouring out a water glass with one hand, the other hand at his crotch.

TYLER (CONT'D)

... Oh, yeah. *Oh*, yeah.

Jack turns back TO CAMERA.

JACK

He farted on creme brulee; he

sneezed on braised endive; and,

with creme of mushroom soup, he..

he..

TYLER (O.S.)

Go ahead. Say it.

JACK

Well, you get the idea.

EXT. PARKING LOT OF TAVERN - RESUMING

Tyler and Jack come out of the bar; Jack shakes his head.

What?

JACK

TYLER

Hit me as hard as you can.

Tyler leads Jack into an open area, lit by a streetlamp.

JACK

I don't know about this, Tyler.

TYLER

I don't know either. I want to

find out. We're virgins. Neither

one of us has ever been hit.

39.

JACK

You've never been in a fight?

TYLER

I didn't say that. I said I've never been hit.

JACK

That's good, isnt' it?

TYLER

Listen to me -- hit me. You're the only one I ever asked.

Me?

JACK

Jack stares at him. The five drunken GUYS -- the same ones who stared at them earlier -- have formed a distant perimeter, sensing a fight.

Jack glances at them, then back at Tyler.

JACK (CONT'D)

I've.. never hit anyone in my life.

TYLER

Go crazy. Let it rip.

JACK

Where do you want it? In the face

or the stomach?

TYLER

Surprise me.

Jack swings a wide, clumsy roundhouse that connects with Tyler's neck.

It makes a dull, soft flat sound. Tyler's neck turns red.

JACK

Shit. Sorry. That didn't count.

Let me try again.

TYLER

Like hell. That counted.

Tyler shoots out a straight punch to Jack's chest. The impact makes a dull, barely-audible sound and Jack falls back against a car. The Guys whoop and clap, moving closer. Jack's eyes involuntarily well up with tears. He and Tyler breathe HEAVILY and sprout BEADS of SWEAT on their faces.

40.

TYLER (CONT'D)

How do you feel?

Strange.

JACK

TYLER

But a *good* strange.

Is it?

JACK

TYLER

We've crossed the threshold.

JACK

... I guess so.

TYLER

You want to call it off?

JACK

Call what off?

The fight.

TYLER

JACK

*What* fight?

TYLER

I'm tired of watching only professionals. I don't want to die without any scars. How much can you really know about yourself if you never go at it, one-on-one?

Tyler..

JACK

TYLER

Are you a pussy?

Jack swings another roundhouse that slams right under Tyler's ear. The sound, soft and flat. Tyler punches Jack in the stomach. The Guys move closer, cheering the fight. Tyler and Jack move clumsily, throwing punches. They breathe heavier, their eyes red and bright.

They drool saliva and blood. They each hurt badly and become dizzier from every impact.

41.

JACK (V.O.)

If you've never been in a fight,

you wonder about getting hurt,

about what you're capable of doing

against another man.

Tyler and Jack keep fighting. The guys mix laughter with their cheers, looking at each other in wondrous amusement.

EXT. CURBSIDE - LATER

Jack and Tyler sit on the curb, staring at the sparse headlights on the nearby freeway. Their eyes are glazed with endorphin-induced serenity.

They look at each other. Laugh. Look away.

TYLER

What were you fighting?

JACK

My job. My boss, who fiddles with

my DOS execute commands. Marla, at

my support groups. Everything

that's broken and doesn't work in

my life. What were you fighting?

My father.

TYLER

A pause as Jack studies Tyler's face.

JACK

We should do this again sometime.

Tyler cracks a smile, gives a sidelong glance to Jack, then returns his stare to the night sky.

EXT. PAPER STREET - NIGHT

A street sign: "PAPER STREET". An abandoned PAPER MILL sits on one side and only ONE HOUSE on the other, the rest of the land being undeveloped grass and weeds. It's an old, grand, three-story gone to seed. It looks abandoned, too.

INT. PAPER ST. HOUSE - LIVING ROOM -SAME

Tyler leads Jack up a staircase to a 2ND FLOOR LANDING, then opens the door to a room.

INT. ROOM - CONTINUOUS

Jack steps into the room, sits down on the old bed. It CREAKS. Dust drifts upward.

42.

JACK (V.O.)

I don't know how Tyler found the

house. He'd been there for half a

year. It was waiting for re-zoning

or something.

CUT TO:

EXT. LOU'S TAVERN PARKING LOT - NIGHT

LONG SHOT - ZOOMING OUT - A group of SIX GUYS watching TWO GUYS in a

fist fight. CUT TO:

INT. PAPER ST. HOUSE - KITCHEN - MORNING

Jack, his face showing new bruises and cuts, his knuckles puffy, shoos away cockroaches as he makes coffee with a wire- mesh strainer. He has a happy little smile.

JACK (V.O.)

Nothing worked. The rusty plumbing

leaked. Turning on a light meant

that another light in the house

went out. The stairs were ready to

collapse.

CUT TO:

EXT. CONVENIENCE STORE PARKING LOT - NIGHT

LONG SHOT - ZOOMING OUT - Resuming from previous shot, getting further

away, but now with TEN GUYS around two guys fighting. CUT TO:

INT. SHOWER - MORNING

Jack, showing some new bruises, with even fatter knuckles, turns on the water. LOUD VIBRATION from the walls. Water spits in starts, then

dribbles out. CUT TO:

INT. KITCHEN - MORNING

Tyler, in a nice suit, checks over the bars of soap in his briefcase, then shuts it. Jack walks in, dressed in his work clothes. He picks up a battered old saucepan with boiling coal-black coffee and sips. He offers it to Tyler, who sips. Jack pulls a TOOTH out of his mouth and throws it into the sink. They both walk out the door.

43.

EXT. CINEMA PARKING LOT - NIGHT

LONG SHOT - ZOOMING OUT - Resuming from previous shot, getting further

away, but now with FOURTEEN GUYS around a fight. CUT TO: EXT. PORCH - NIGHT

Tyler, in his waiter uniform, sits next to Jack on the lip of the porch. They both have newer, different bruises and cuts, sit and guzzle beer. THUNDERCLAPS. RAIN begins to fall. Tyler gets to his feet.

INT. BASEMENT - SAME

Tyler and Jack are knee-deep in water, standing by a FUSEBOX. Tyler opens it. He grabs two breaker switches, waits for Jack. Jack grabs two other switches, apparently, they have to do this in a certain

order. Tyler flips his switches, then Jack flips his. CUT TO:

EXT. CONSTRUCTION AREA - NIGHT

LONG SHOT - ZOOMING OUT - Resuming from previous shot, getting further

away, but now with EIGHTEEN GUYS around a fight. CUT TO: INT. LIVING ROOM - NIGHT

Rain DRIPS from the ceiling -- some of it from LIGHT FIXTURES. Tyler and Jack enter with LIT CANDLES. They sit down on the decrepit, buckled wood floor. There's not one item of furniture in the room.

There are, however, THOUSANDS of MAGAZINES.

JACK (V.O.)

The previous occupant collected

magazines.

They each pick up an opened magazine and resume reading, adjusting close to the candles.

Tyler lies down next to him, setting his candle next to Jack's. Tyler picks up a magazine.

TYLER

What are your reading?

44.

JACK

"I Am Joe's Lungs". It's written in first person. "Without me, Joe could not take in oxygen to feed his red blood cells".

TYLER

Sounds fascinating.

JACK

It's a whole series -- "I Am Joe's Prostate".

TYLER

"I get cancer, and I kill Joe".

JACK

What are you reading?

TYLER

Soldier of Fortune, National

Geographic. New Republic. Forbes.

Show-off.

JACK

JACK (V.O.) (CONT'D)

Every Wednesday night, after

fighting like wild animals, we were

too wired to go to sleep.

INT. CONFERENCE ROOM - DAY

In near DARKNESS as a SLIDE SHOW progresses, run by a chipper salesman, WALTER. Jack sits, deadpan, with a PUFFY LIP and a BRUISE on his cheek.

JACK (V.O.)

Thursday morning, my Boss didn't

know what to think.

Boss blocks him from the rest of the room, gives him a dubious look, turns back to Walter.

JACK (V.O.)

And all I could do was think about

next week.

Walter advances to the next slide, showing a view of a COMPUTER SCREEN.

45.

WALTER

The basic premise of microsofting

your office is -- make things more

efficient.

As Walter continues, his sales pitched gets drowned out by Jack's narration:

JACK (V.O.)

Walter, the Microsoft account exec,

smiled at me with his steam shovel

jaw. Walter, with his smooth, soft

hands. Here he was, doing his cute

little show. Maybe thinking about

a free-range potluck he'd been to

last weekend, but probably not.

Walter moves to Jack and slaps his shoulder.

WALTER

I showed this already to my man

here. You liked it, didn't you?

Slowly, Jack smiles. His teeth are RED with BLOOD. They GLOW eerily in the dim light.

JACK (V.O.)

You can swallow a pint of blood

before you get sick.

WALTER

Jeez, I'd hate to see what happened

to the other guy.

Jack keeps the smile frozen on his face.

JACK (V.O.)

Fuck Walter. His candy ass

wouldn't last a second in fight

club.

EXT. LOU'S TAVERN - NIGHT

Out of silent darkness, HEADLIGHTS appear from all directions. A synchronous WAVE of cars PULLS UP and parks in the already- filled lot.

Young men get out of the arriving cars and wander into the tavern. We recognize, among them, the GUYS who watched Tyler and Jack's *first fight*.

INT. LOU'S TAVERN - SAME

The men enter; the bartender, IRVINE, calls out:

46.

IRVINE

Drink up people. We're closing.

Let's go.

The crowd consists of men and women YUPPIES: blue collar REGULARS dressed in work clothes or like cowboys; floozy barfly WOMEN. MUSIC plays from the jukebox.

The arriving men simply wait. And wait. Tyler and Jack enter. They, too, stand back against he wall.

The waiting army begins to share secret looks and grins. A certain level of eagerness can be seen among them.

Irvine looks at Jack and grins. He flips on LIGHTS. The drunken customers squint and get the message. They gulp down their drinks, plop down money and filter out the door. Irvine hits a button and the jukebox loses power -- the record simply turns slower until it stops revolving.

Finally, the last of the irritated customers leaves. One guy locks the door. Two other guys pull down blinds. Someone else moves over to the BASEMENT DOOR and opens it.

INT. BASEMENT STEPS - MOMENTS LATER

The grinning men march down steps; CHATTER begins.

TALL GUY

I brought my roommate tonight.

Phil.

FAT GUY

Oh, yeah? Hi, Phil.

TALL GUY

He kept seeing what I looked like.

Had to check it out.

INT. TAVERN BASEMENT - SAME

A BOMB-SHELTER -- concrete floor, concrete walls. One BARE LIGHT BULB hangs by a wire from the ceiling. Tyler nods to Jack and Jack turns on the light. The guys mill around, finding partners. The whole mood is very friendly. Everyone brims with eagerness, but tries to act cool about it. CHATTER gets LOUDER.

FAT GUY

A mean uppercut.

WIRY GUY

I gotta work on my left.

47.

SHORT GUY

*He's* got a left.

FAT GUY

Hey, you're wiping the floor with

dudes who are way out of your

weight class.

TALL GUY (SLAPPING WIRY GUY'S SHOULDER)

Skinny guys. They fight till

they're burger.

PEAKING CHATTER, then -- Tyler moves into position directly under the light bulb. His face is partially in shadow.

Everyone spreads out, forming a circle, the light bulb for a center.

Tyler's will WIPES through the room and the CHATTER DIES. A couple of COUGHS, FEET SHUFFLING. Then, SILENCE.

TYLER

The first rule of fight club is --

you don't talk about fight club.

The second rule of fight club is -- you don't talk about fight club.

Jack glances over at a short guy, RICKY, with a BLACK EYE.

JACK (V.O.)

This kid, Ricky -- supply clerk --

he can't remember whether you

ordered pens with blue ink or black

ink..

TYLER

The third rule in fight club is --

when someone says "stop" or goes

limp, the fight is over. The

fourth rule is -- only two guys to

a fight.

JACK (V.O.)

But Ricky was a god for ten minutes

when he trounced an actuary twice

his size.

TYLER

Fifth rule -- one fight at a time.

Sixth rule -- no shirts or shoes.

48.

1. eventh rule -- fights go on as long as they have to. And the eighth rule of fight club is -- if this is your first night, you *have* to fight.
2. yler steps back, and a FAT MAN and a GOATEED MAN take off their shirts and shoes and step into the center. They circle each other, then begin throwing punches. SWEAT flies into the moist air. SHOUTS become

DEAFENING.

JACK (V.O.)

Sometimes you could hear flat, hard

packing sounds over all the yelling

JACK (V.O.)

as someone caught his breath and

sprayed:

Ssstop.

GOATEED MAN

INT. OFFICE PARK RESTAURANT - DAY

Jack, eating lunch, is served a refill soda by the BROKEN- NOSED WAITER with a GOATEE, the man from the above fight.

JACK (V.O.)

Even if I could tell someone they

had a good fight, I wouldn't be

talking to the same man. Who you

were in fight club is not who you

were in the rest of your world.

You weren't alive anywhere like you

were alive at fight club. But

fight club only exists in the hours

between when fight club starts and

when fight club ends.

INT. JACK'S OFFICE - DAY

Boss, passing by the doorway, looks in at Jack with irritated wonder.

Jack, playing solitaire on his computer, daubs blood from his mouth with a handkerchief.

BOSS

What are you getting yourself into

every week?

Jack flashes a smile at Boss. Boss shakes his head, walks away.

49.

JACK (V.O.)

After a night in fight club,

everything else in your life gets

the volume turned down. You can

deal with anything. All the people

who used to have power over you

have less and less.

Reflexively, Jack's tongue plays with his teeth.

JACK (V.O.)

By this point, I could wiggle most

of the teeth in my jaw.

INT. BUS - DAY

Jack stands, holding a hand grip. An arrogant MAN in a three- piece suit brushes past him, knockng his shoulder.

JACK (V.O.)

We all started to size people up.

Jack violently knocks the Man's shoulder in return. The Man turns and he and Jack face each other for a brief moment. Jack's face is stone.

JACK (V.O.)

I'd look at some asshole and *know*

I could beat him.

The arrogant Man continues down the aisle. Jack notices a GUY with SMASHED LIP. The Guy grins, giving a slight nod.

INT. PARKING GARAGE - DAY (FLASHBACK)

Jack walks past the parking garage. He sees a VALET who has facial bruises.

JACK (V.O.)

We were all doing it.

The Valet and Jack share a quick smile. A BMW pulls up and HONKS at the Bruised Valet. The bruised Valet has no reaction as a FAT EXEC gets out of his car and tosses the keys. Jack watches the Bruised Valet size up the Exec, then hop into the car and loudly PEEL OUT.

JACK (V.O.)

I would see them all the time --

fight club members looking at other

guys, knowing they could kick their

asses.

50.

INT. TAVERN BASEMENT - NIGHT

Jack lands a couple of jabs to HIS OPPONENT'S stomach, then brings up a left uppercut that smashes the Opponent's jaw. Tiny spatters of BLOOD adorn the walls, along with sweat.

JACK (V.O.)

Fight club was not about winning or

losing. It wasn't about words.

The Opponent recovers, throws a headlock on Jack. Jack snakes his arm into a counter headlock. They, wrestling like wild animals. The crowd CHEERS maniacally.

JACK (V.O.)

The hysterical shouting was in

tongues, like at a Pentecostal

church.

The onlookers kneel to stay with the fight, cheering ever louder. The Opponent smashes Jack's head into the floor, over and over.

Stop.

JACK

Everyone moves in as the Opponent steps away. They lift Jack to his feet. On the floor is a BLOOD MASK of Jack's face -- similar to his TEAR MASK on BOB'S SHIRT, seen earlier. Tyler pushes through the crowd.

Cool.

TYLER

EXT. BAR - NIGHT

Everyone files out of the bar, sweating, bleeding, smiling.

JACK (V.O.)

Afterwards, we all felt saved.

EXT. SIDEWALK - NIGHT

Jack and Tyler walk through the pools of light cast by streetlamps.

They both drip blood and sport bruises. They each carry a 4x4 piece of WOOD. As they pass parked cars, they SLAM the sticks against the front bumpers, setting off the ALARMS and causing the AIR BAGS to INFLATE.

They come to a bus stop that has a large display ad for jeans. It has a photo of a shirtless man.

51.

TYLER

Is that what a man looks like?

Isn't it?

JACK

Tyler smears blood on the ad. They continue on their way. Tyler comes to a "ROAD WORK" sign. Tyler kicks it into a deep HOLE. He and Jack tightrope-walk on wooden beams over darkness.

TYLER

Guys packing into the gyms, all

trying to look like what Calvin

Klein says. Fight club isn't about

looking good.

As they step back onto solid pavement, Tyler kicks one of the beams, causing it to come loose and fall. The whole temporary work structure falls into the hole. Tyler and Jack continue walking. IN the background, a car SKIDS and FISHTAILS, avoiding the hole.

Sound of a SIREN getting closer. Tyler hands Jack the 4x4 and runs, laughing. Jack stands there a moment, then throws the stick and runs after Tyler.

JACK (V.O.)

A guy comes to fight club for the

first time, and his ass is a wad of

cookie dough. After a few weeks,

he looks carved out of wood. He

trusts himself to handle anything.

EXT. ANOTHER STREET - CONTINUOUS

Jack and Tyler, panting, sweat mixing with blood, slow down and resume walking. Tyler pulls his fingers, popping them -- his knuckles are swollen. He grins at the pain.

TYLER

Self-improvement is masturbaation.

Self-destruction is the answer.

INT. PAPER ST. HOUSE - KITCHEN - LATE AFTERNOON

The PHONE RINGS. Jack enters from the living room, buttoning his shirt. He answers.

Hello?

INTERCUT WITH

JACK

52.

INT. MARLA'S ROOM - SAME

She lies on the bed, twisting the phone cord around her neck like a noose.

MARLA

Where have you been the last few

weeks?

Marla?

JACK

MARLA

I haven't seen you at any support groups.

JACK

That's the idea -- we split them.

MARLA

You haven't been going to yours.

JACK

I found a new one.

MARLA

Really? Can I go to it?

JACK

It's for men.

MARLA

Like testicular cancer?

JACK

Like that. Look, this is a bad time.

MARLA

I started going to debtor's anonymous. You want to see *really* fucked up people?

JACK

Look, I'm going out..

MARLA

1. 'm going out of my mind. I got a stomach full of Xanax. I took what was left of the bottle. Might've been too much.. probably was.
2. ack turns TO CAMERA.

53.

JACK (V.O.)

Picture yourself watching Marla

throw herself around her crummy

apartment, saying, "I'm dying.

Dying. Dying. It could go on for

hours.

JACK

You probably want to die in peace.

I'll let you go.

MARLA

Stay on the line. I want you to

hear me describe death.

Jack puts the handset on top of the phone, still off the hook, and walks out of the kitchen.

MARLA'S VOICE

I want to see if my spirit can use

the telephone.

INT. BEDROOM - LATE NIGHT

GRUNTS OF PLEASURE AND EXERTION. IN DIM LIGHT, WE GET GLIMPSES OF TORSOS, ASSES, LEGS, ARMS, BREASTS, AND BLACK FEMALE HAIR -- ALL DRENECHED IN SWEAT. SHEETS RIP. CA- CHUNK! CA-CHUNK! BODIES HIT THE FLOOR AND ROLL. MORE INSANE GRUNTING. AND LAUGHING -- CACKLING.

flash of MARLA'S FACE. Then, groans of ecstasy approaching climax.

CUT TO:

INT. JACK'S BEDROOM - SUNRISE

Jack sits up in bed, looks around the room.

INT. 2ND FLOOR LANDING

Jack steps out of his room, looks down to the next door -- the door is closed.

JACK (V.O.)

Tyler's door was closed. I'd been

living here a month, and Tyler's

door never closed.

INT. BATHROOM - SAME

Jack stares into the toilet. CLOSE UP - SIX USED CONDOMS IN TOILET.

54.

INT. KITCHEN - MORNING

Jack sits at the table, sipping coffee, reading Reader's Digest. He takes in a long yawn, rubs his eyes. He hears FOOTSTEPS approaching.

JACK

You're not going to believe the

dream I had.

Marla walks in, straightening her dress. She looks like she's been raped by a hurricane. Some of her hair is matted against her head, some of it is sticking out wildly. Jack gapes at her in shock. She cracks a coy smile and runs a finger across the back of his neck.

MARLA

I can hardly believe *anything*

about last night.

She pours herself a cup of coffee. She takes a big gulp, GARGLES and SPITS it out into the sink. She gives Jack a lascivious smile. Then, she sips from the cup. She strokes his hair. He pulls back from her.

JACK

What the fuck are you doing here?!

Marla looks at him a beat, then throws the cup into the sink and it

SHATTERS.

Fuck you.

MARLA

She kicks open the door to the backyard and walks out. Jack watches her stomp across the lawn to the sidewalk and down the street.

Jack turns and -- Tyler is at his shoulder, staring after Marla. He's in his usual sweatpants. He grins at Jack, then moves away, pours himself coffee. Jack, smoldering, slumps at the table and picks up Reader's Digest. Tyler puts his foot on a countertop and begins to do stretching exercises.

TYLER

That crazy bitch almost fucked me

in half. Get this -- I come home

and the phone is off the hook..

55.

MOVE IN ON JACK'S FACE as he pretends to read, but glances up at Tyler.

TYLER'S VOICE

FADES AS:

JACK (V.O.)

I already knew the story before he

told it to me.

INT. KITCHEN - LATE AFTERNOON (FLASHBACK)

Tyler enters through the back door and moves to the phone.

MARLA'S VOICE (FROM HANDSET)

I'll tell you when I'm floating out

of my body.

Gently, Tyler lifts the handset and listens, smiling.

JACK (V.O.)

I don't know why, but Tyler

actually thought it was a *bad*

thing that Marla was about to die.

INT. 8TH FLOOR LANDING - LATE AFTERNOON (FLASHBACK) Tyler reaches the top of the stairs and heads for Marla's

room. Before he can knock, Marla's hand shoots out and grabs Tyler's arm.

INT. MARLA'S ROOM - CONTINUOUS (FLASHBACK)

Marla pulls Tyler inside and shuts the door. Her drugged eyes look him over.

MARLA

You got here fast.

She staggers and sits on the bed. She slides off, along with the blanket and sheets, to the floor.

MARLA (CONT'D)

The mattresses here are all sealed

in slippery plastic.

She tries to focus her eye on Tyler.

MARLA (CONT'D)

Did I call you?

SIRENS and vehicles SCREECHING to a halt outside. Doors opening and SLAMMING; running FOOTFALL. Marla scowls and RAMS Tyler with her knee, knocking him off her.

56.

MARLA (CONT'D)

You called the cops?! Shit!

She gets to her feet, grabs Tyler, hauls him to his feet and pulls him out the door.

INT. HALLWAY (FLASHBACK)

Marla LOCKS her door, then shoves Tyler toward the staircase. She and Tyler suddenly flatten agains the wall as COPS and PARAMEDICS charge by with oxygen.

COP

Where's 8-G?

MARLA

End of the hall.

The rescuers keep running. Marla and Tyler start down the steps.

Marla lingers a beat, hearing the cops bang on the door. She calls out to them:

MARLA (CONT'D)

The girl who lives there used to be

a charming, lovely girl. But she

has no faith in herself.

Tyler yanks on Marla's arm. They continue down the steps, with Marla's speech getting louder.

MARLA (CONT'D)

And she's worried that, as she

grows older, she'll have less

options.

She's turned into a monster! She's infectious human waste! Good luck trying to save her!

INT. KITCHEN - NIGHT (FLASHBACK)

Tyler makes coffee. Marla slouches against the refrigerator.

MARLA

If I fall asleep, I die. You have

to keep me up all night.

Tyler smiles.

JACK (V.O.)

He was able to handle it.

57.

INT. TYLER'S ROOM - DAWN (FLASHBACK)

Marla and Tyler, in a wrecked bed. Tyler's eyes are closed. Marla kisses his ear.

MARLA

According to ancient Chinese

custom, you're responsible for me

forever, because you saved my life.

INT. KITCHEN - MORNING - RESUMING

Tyler gulps some coffee, shaking his head.

TYLER

... And she's spouting this crap

she got from watching too much

television.

JACK (V.O.)

If only I hadn't gone to a movie.

If only I went to her stupid room

to watch her die.

Tyler sits opposite him, studies his face.

TYLER

You aren't doing her, are you?

JACK (V.O.)

I Am Joe's Raging Bile Duct.

No.

JACK

TYLER

I didn't think so.

JACK

You didn't think so?

TYLER

She's not your type.

JACK

How would you know what my type is?

TYLER

She's just a wild, twisted bitch.

JACK

Oh, and my pace is more librarians and den mothers.

58.

Kinky.

TYLER

JACK (V.O.)

How could someone like Tyler get involved with someone like Marla Singer? It was impossible.

JACK

Marla doesn't need a lover. She needs a case worker.

TYLER

This is sport-fucking. She's a hosebag.

JACK (V.O.)

She invaded my support groups, now she's invaded my home. My friendship. Like a cancer.

TYLER

You're okay, aren't you?

JACK (V.O.)

I Am Joe's Clenching Bowels.

Sure.

JACK

JACK (V.O.) (CONT'D)

Put a gun to my head and paint the wall with my brains.

JACK (CONT'D)

It's fine, great.

TYLER

Now, listen. You gotta understand something about me. I got a little rule. Don't ever talk to her about me. I can't stand that kind of shit.

Tyler fixes Jack with a friendly, but firm stare.

TYLER (CONT'D)

If you ever mention me to her -- or anyone else -- I'll find out about

it. And you'll never see me again.

Okay.

JACK

59.

TYLER

You promise?

I promise.

JACK

Tyler abruptly gets up and leaves the kitchen. Jack watches him go, smoldering.

INT. LIVING ROOM - NIGHT

Jack sits watching television at HIGH VOLUME. Sounds of ROUGH SEX from upstairs.

CUT TO:

INT. JACK'S BEDROOM - NIGHT

Jack lies calmly, in a Zen state, on his bed, staring at the ceilng.

Sounds of THUMPS and CRASHES from beyond the wall, along with Tyler's and Marla's VOICES, SNARLING:

MARLA'S VOICE

You slimy discharge!

JACK (V.O.)

I could've moved to another room,

one on the third floor -- so I

wouldn't have heard them. But I

didn't.

INT. BATHROOM - NIGHT

Jack brushes his teeth.

JACK (V.O.)

I wrote little haiku things:

"Worker bees can leave Even drones can fly away The queen is their slave"

I became the calm little center of the world. I was the Zen master.

MOVE IN ON -- KEYHOLE - Jack's EYE

MARLA

(gasping in passion)

I love you. I want to have your

abortion.

60.

INT. BASEMENT - NIGHT

Sound of RAIN pelting the house. Jack flips the fuses off, walks up the stairs.

JACK (V.O.)

"A tiger can smile A snake will say

it loves you Lies make us evil"

INT. 2ND FLOOR LANDING - SAME

Jack walks up the steps. He hears Marla SCREAM in orgasm. He reaches the landing. Tyler's door is slightly ajar. Jack can't help stopping.

JACK'S POV - TYLER'S ROOM

Marla's legs are sprawled on the bed. Her head is down over the far side, out of view. The door PUSHES OPEN WIDER -- Tyler, naked, stands

CLOSE TO CAMERA.

TYLER

What are you doing?

WIDE ON LANDING

Jack steps back.

JACK

I.. uh.. just going to bed.

Tyler grins and nods toward bed.

TYLER

You want to finish her off?

Uh.. nah..

JACK

Jack continues toward his room.

INT. JACK'S OFFICE - DAY

Jack's clothes are PERMANENTLY STAINED with BLOOD. He sits in his Zen pose, typing. We see his HAIKUS on the screen.

JACK (V.O.)

I faxed them around to everyone.

He hits "SEND". Boss enters, reacts with exasperated irritaiton at the sight.

61.

BOSS

Is that your blood?

JACK

*Some* of it, yeah.

Boss stares at Jack like he's from Mars.

BOSS

Take the rest of the day off. Come

back tomorrow with clean clothes.

And get yourself together.

INT. HALLWAY - SAME

Jack, looking like a war casualty, walks past COWORKERS who coldly stare at him. His face is totally passive.

JACK (V.O.)

I got right in everyone's hostile

little face. Yes, these are

bruises from fighting. See? It's

nothing to me? See how cool I am

about it?

That's right, I'm enlightened!

EXT. PAPER STREET - SUNSET

Jack walks toward the house.

JACK (V.O.)

You give up the condo life, give up

all your worldly possessions and go

live in a dilapidated house in the

toxic waste part of town.

INT. TYLER'S KITCHEN - SUNSET

Jack walks inside. Sound of VIOLENT SEX from upstairs -- THUDS and WHAMS. Pieces of PLASTER fall from the ceiling in tufts of dust.

JACK (V.O.)

... And you come home to *this*.

TYLER'S VOICE

Take that, butt wipe!!

Jack rolls his eyes, takes off his pants. He runs water in the sink.

62.

He takes a tiny bit of soap and begins to scrub the blood stains.

PHONE RINGS. He answers.

JACK

Hello? Speaking.

INTERCUT WITH

INT. POLICE STATION - OFFICE

DETECTIVE STERN leans forward in his chair, consulting a file.

DETECTIVE STERN

This is Detective Stern with the

arson unit. We have some new

information about your condo. The

deadbolt on your front door was

shattered. Someone sprayed freon

into the lock to freeze it. Then,

they tapped it with a cold chisel

to shatter the cylinder.

JACK (V.O.)

I Am Joe's Cold Sweat.

And, in fact, cold sweat beads up on Jack's forehead. He scrubs his pants obsessively.

DETECTIVE STERN

The dynamite had a residue of

ammonium oxalate and potassium

perchloride -- this means we can

assume it was homemade.

JACK

This is.. really a shock to me,

Sir.

DETECTIVE STERN

Whoever set the dynamite could've

turned on the gas and blown out the

pilot lights on the stove days

before the explosion took place.

The gas was just the trigger.

JACK

Who do you think did it?

DETECTIVE STERN

I'm asking the questions, son.

63.

JACK

I loved my life. I loved that condo. I loved every stick of furniture. That was my whole life. Everything -- the lamps, the chairs, the rugs -- *were* me. The dishes were me. The plants were me. The television was me.

JACK (V.O.) (CONT'D)

I'd like to thank the academy..

DETECTIVE STERN

Do you know anyone who'd have the expertise and the motive to do something like this?

Jack's eyes move upward, then back down.

Uh.. no.

JACK

DETECTIVE STERN

Well, think about it. If any ideas

come to you, give me a call. And,

in the meantime, don't leave town.

END INTERCUT

Jack hangs up the phone, turns to

see Tyler standing right next to

him.

Tyler puts a hand on Jack's shoulder, squeezes it affectionately.

Jack turns away and continues to scrub -- rebuffing Tyler. Tyler smiles compassionately at him.

Marla's FOOTSTEPS can be heard coming down the stairs. JACK'S POV --

as he really grinds the soap against the pants, splashes water all over the place.

JACK'S POV PIVOTS, WIDEN ON ROOM. MARLA ENTERS. TYLER IS

GONE. JACK

looks around to the open back door,

then back at Marla. She lights a

cigarette.

JACK (V.O.)

Except for their humping, Tyler and

Marla were never in the same room.

64.

The same disappearing act my parents pulled for years -- one came in, and the other was gone.

Marla moves very close to Jack and props a leg up on a stack of magazines near him. She's not wearing underwear. Jack becomes very aware of his having no pants on, so he pushes up against the counter.

Marla lasciviously pulls the hemline further up her leg.

MARLA

I got this dress at a thrift store

for one dollar.

JACK

It was worth every penny.

MARLA

It's a bridesmaid's dress. Someone

loved it intensely for one day,

then tossed it. Like a Christmas

tree -- so special, then, bam, it's

on the side of the road with tinsel

still clinging to it.

She leans in very close to his ear and whispers hoarsely:

MARLA (CONT'D)

You can borrow it sometime.

JACK

That's hysterical.

Marla blows smoke into Jack's face. He grabs her cigarette, throws it into the water in the sink. She smiles saucily and LEAVES the room.

Sound of her FOOTSTEPS going upstairs.

TYLER (O.S.)

Get rid of her.

Jack turns and sees Tyler in the back doorway.

JACK

*You* get rid of her.

TYLER

And don't mention my name. You

promised.

JACK

Yes, yes, I promise.

65.

Promise?

TYLER

JACK

I said I promise!

TYLER

That was three times you promised.

Marla's FOOTSTEPS can be heard coming down the staircase.

TYLER (CONT'D)

Tell her to go.

Jack looks toward the archway, then back at -- ? Tyler is GONE. Marla glides into the kitchen with a PACK of cigarettes. She daintily takes one out and lights it.

JACK (V.O.)

I'm six years old again, passing

messages between my parents.

JACK

Uh.. I think you should go now.

Marla begins to do a slow, exotic dance around the kitchen, sometimes moving very close to Jack, sometimes moving away. She lifts her dress dangerously high -- does she expose herself? -- hard to tell. She dances very close to Jack's body, almost touching it.

JACK (CONT'D)

What are you trying to do?!

Marla stops dancing, and BURSTS into loud LAUGHTER.

MARLA

You're such a nutcase, I can't even

begin to keep up.

She touches Jack's hair. He slaps her hand away.

JACK

Just get out of here.

Marla's face turns sour. As she stomps out the back door --

MARLA

I'm already so fucking gone that

all you see is an after-image.

Jack watches her through the kitchen window.

66.

Good job.

TYLER (O.S.)

As Jack turns, we WIDEN to include Tyler, standing right behind Jack, beaming. Through the window, in the background, Marla can be seen quickly moving away on the sidewalk. Tyler puts his hand on Jack's shoulder.

TYLER (CONT'D)

Let's get out of this place for

awhile, take a walk.

EXT. STREET - NIGHT

Tyler moves forward at a brisk pace. Jack keeps up with him. Tyler cuts across a paved road and into a WOODED AREA. Jack follows.

EXT. ALL-NIGHT CONVENIENCE STORE - MOMENTS LATER

Tyler, with Jack following, emerges from the trees and heads into the parking lot.

A Clerk ambles toward his car, taking off his uniform bow tie. Tyler suddenly pulls a HANDGUN out of his belt and rams it against the Clerk's head.

EXT. WOODED AREA - CONTINUOUS

Tyler marches the Clerk, the gun aimed at his head. Jack follows.

JACK

What are you doing?!

Shut up.

TYLER

JACK

Are you out of your fucking mind?!

Shut up.

TYLER

Tyler stops the Clerk and pushes him down to a kneeling position.

TYLER (CONT'D)

Give me your wallet.

The Clerk fumbles his wallet out of his pocket and Tyler snatches it.

Tyler pulls out the driver's license.

67.

TYLER (CONT'D)

Raymond K. Hessel. 1320 SE

Benning, apartment A. A small,

cramped basement apartment.

RAYMOND

How'd you know?

TYLER

They give basement apartments

letters instead of numbers.

Raymond, you're going to die.

RAYMOND

Please, God, no.

JACK

What are you doing?!

TYLER

(to Jack)

SHUT UP! You have no idea of what

it is to hit bottom. I've been

trying to get you there -- I blew

up your condo.

JACK

... The.. cops are onto you.

TYLER

No, they think *you* did it.

TYLER

CONTINUES, TO

RAYMOND:

TYLER (CONT'D)

Your mom and dad will have to call

old doctor so-and-so to get your

dental records, because there won't

be much of your face left.

Raymond begins to weep, his shoulders heaving. Jack starts to gasp for air. Growing even paler, he slumps back against a tree. His mouth becomes dry.

TYLER (CONT'D)

Is this a picture of Mom and Dad?

Yesss..

RAYMOND

JACK

Look, if this is all about me..

68.

TYLER

You? Nothing is about you.

JACK

I'm doing okay, aren't I?

TYLER

You don't have your cute, little

condo or your fey furniture, you're

living in squalor..

TYLER

CONTINUES, TO

RAYMOND:

TYLER (CONT'D)

An expired community college

1. ID card. What did you used
2. , Raymond K. Hessel?

S-S-Stuff.

RAYMOND

TYLER

"Stuff". Were the mid-terms hard?

Tyler shoves the gun against Raymond's temple.

TYLER (CONT'D)

I asked you what you studied.

RAYMOND

Biology, mostly.

Why?

TYLER

RAYMOND

I don't know.

TYLER

What did you want to be Raymond K.

Hessel?

A long beat while Raymond weeps and says nothing. Tyler COCKS the gun.

Jack JERKS back, wincing, sweating.

... Tyler?

JACK

69.

I'm busy.

TYLER

TYLER

CONTINUES, TO

RAYMOND:

TYLER (CONT'D)

The question, Raymond, was "what

did you want to be"?

Tyler begins to squeeze the trigger.

JACK (CROAKING WITH DRY MOUTH)

Answer him!

RAYMOND

A VETERINARIAN!

Animals.

TYLER

RAYMOND

Yeah.. animals and s-s-s --

TYLER

-- *Stuff*. That means you have to

get more schooling.

RAYMOND

Too much school.

TYLER

Would you rather be dead?

Tyler shoves Raymond's wallet back into his pocket.

TYLER (CONT'D)

I'm keeping your license. I know

where you live. I'm going to check

on you. If you aren't back in

school on your way to being a

veterinarian, you will be dead.

Now, get the hell out of here.

Raymond staggers into the darkness. Tyler watches. Jack, still clinging to a branch with a deathgrip, looks at Tyler. Tyler slowly turns to face Jack.

TYLER (CONT'D)

Raymond K. Hessel, tomorrow will be

the most beautiful day of your

life.

(MORE)

70.

TYLER (CONT'D)

Your breakfast is going to taste

better than any meal you've ever

eaten.

Jack's eyes light up. He looks at the fleeing Raymond, then back at Tyler. He sighs, then shakes his head, then cracks his weird, little crooked smile. His eyes glow. He looks with almost religious reverence at Tyler.

Tyler turns and smiles at Jack.

TYLER (CONT'D)

To make soap, first you have to

render fat.

CLOSE UP - SIGN: "DANGER - BIOHAZARD"

PULL BACK TO WIDE ON

EXT. FENCED-IN BIOHAZARD WASTE DUMP SITE - NIGHT

Tyler is on the ground, inside the fence. Jack's at the top of the fence, trying to get through the BARBED WIRE. He does so, but wobbles and gets his shirt snagged. Tyler tries to help him. Jack falls, ripping his shirt. Tyler breaks the fall, gets Jack to his feet.

FOOTSTEPS. FLASHLIGHT BEAM. Tyler pulls Jack down behind a DUMPSTER

-- one of DOZENS in the site. A silhouette of a SECURITY GUARD moves

along the perimeter, waving the flashlight around. He finally walks back toward the adjacent building, goes inside.

MOVE BACK to Tyler and Jack, who emerge from hiding. Tyler eagerly grabs the lid of the closest dumpster. Jack gapes at the "biohazard" sign.

TYLER

The best fat for making soap --

because the salt balance is just

right -- comes from human bodies.

Tyler lifts the lid -- it CREAKS. Jack breathes heavily, afraid to look. Tyler pulls out an industrial-sized, think plastic bag full of PINK GOO. Jack reacts to the smell, turning away. His eyes focus on the side of the adjacent building and its SIGN: "BODY SCULPTING

CLINIC".

71.

TYLER (CONT'D)

>From the asses and thighs of rich

women, paydirt.

INT. KITCHEN - NIGHT

Jack watches at Tyler stirs a boiling pot.

TYLER

As the fat renders, the tallow

floats to the surface of the water.

EXT. WASTE DUMP SITE - NIGHT (RESUMING)

Tyler and Jack climb back over the fence, each carrying several bags of fat. One of Jack's bags gets caught on the barbed wire and rips, spilling the goo all down the fence. Jack's pants and shoes get covered; he slips and slides. Tyler starts laughing. Jack starts laughing.

INT. KITCHEN - NIGHT (RESUMING)

Tyler shows Jack two pots which have a skinned-over layer.

TYLER

When the tallow separates, there

will be a clear layer on top. It's

glycerin. We can mix it back in

when we make the soap.

EXT. WASTE DUMP SITE - NIGHT (RESUMING)

Tyler helps Jack over the fence. They both fall to the ground on the other side, laughing. They try to get up and they both slip in fat, falling on their asses. They laugh louder. FOOTSTEPS; FLASHLIGHT.

Still hysterically laughing, they both get up, slide and fall down again, get up yet again and stagger away, disappearing around a corner.

INT. TAXICAB - MOMENTS LATER

Jack and Tyler, slimed with fat, hold their bags, giggling. The CAB DRIVER gives them a deadpan look.

END OVERLAPPING

INTERCUT. CUT

TO:

INT. KITCHEN - LATE NIGHT

Tyler and Jack have fat stains and rips on their clothes from the waste dump. The pots boil. Tyler stirs.

72.

He sticks a spoon into a pot and lifts up a scoop of the glycerin layer. Then, he grabs a can, opens, it.

TYLER

Lye -- the crucial ingredient for

making soap. A paste of lye and

water can burn through an aluminum

pan. A solution of lye and water

will dissolve a wooden spoon.

Combined with water, lye heats to

over two hundred degrees.

Tyler licks his lips until they're gleaming wet. He takes Jack's hand and KISSES the back of it. The saliva shines in the shape of the kiss.

Tyler poises the can of lye over Jack's hand.

TYLER (CONT'D)

This is a chemical burn, and it

will hurt more than you've ever

been burned.

Tyler pours a bit of the flaked lye onto Jack's hand. Jack's whole body JERKS. Tyler holds tight to Jack's hand. Tears well in Jack's eyes; his face tightens.

TYLER (CONT'D)

Look at your hand.

Jack looks at the burn is swollen glossy in the shape of Tyler's kiss.

Jack's face spasms, but he forces himself to endure it.

JACK (V.O.)

Tyler's kiss was a bonfire or a

branding iron on my hand at the end

of a long, long road I pictured

miles away from me.

Jack takes his gaze off his hand and his eyes become glazed and detached.

TYLER

Come back to the pain.

JACK (V.O.)

Guided meditation worked for cancer

it could work for this.

TYLER

Don't shut this out.

73.

JACK (V.O.)

I didn't think of the words "pain"

or "searing flesh". I was going to

my cave to find my power animal.

Quick CUT TO:

INT. CAVE

Marla, looking beautiful in a stunning black dress.

As soon as Tyler speaks, we CUT BACK TO:

INT. KITCHEN - NIGHT

Tyler squeezing Jack's hand. Jack's eyes re-focus on Tyler.

TYLER

This is the greatest moment of your

life and you're off somewhere,

missing it. Listen. Your father

was your model for God. And if

your father bails out, what does

that tell you about God?

Jack's face spasms in pain. He keeps his attention on Tyler.

TYLER (CONT'D)

You have to consider the

possibility that God doesn't like

you. He hates you. This is not

the worst thing that can happen.

His hate is better that His

indifference.

Jack becomes dazed again. CUT TO:

INT. CAVE

Marla drops to the ground and pulls Jack on top of her. Jack moves to kiss her.

CUT TO:

INT. KITCHEN - NIGHT

Tyler tugs at Jack's arm.

TYLER

We are God's middle children, with

no special place in history and no

special attention.

(MORE)

74.

TYLER (CONT'D)

Unless we get God's attention, we

have no hope of damnation or

redemption.

Jack looks at Tyler and they lock eyes in a stare.

TYLER (CONT'D)

The lower you fall, the higher you

fly. The farther you run, the more

God wants you back.

Jack does his best to stifle his spasms and quivers of pain. Tears drip from his eyes.

TYLER (CONT'D)

Someday, you will die. And until

you know that, you're useless to

me.

Tyler's eyes fill with tears and he smiles. Suddenly, Jack starts breathing heavily and he shakes his hand.

JACK

Fuck, man. This HURTS.

Tyler laughs; Jack, bearing the pain, cracks a weird little crooked smiles, his eyes wide.

INT. KITCHEN - SUNRISE

Tyler watches as Jack cuts several perfectly shaped bars of soap.

Tyler finishes wrapping one. The wrapper says: "The Paper Street Soap Company" in quaint writing.

INT. BARNEY'S - DAY

Jack and Tyler, wearing trenchcoats and looking like death- warmed-over, wait by a counter and trendily-dressed and finely- coiffed SALESPEOPLE zip around. Tyler is the picture of cool. Jack looks around as if expecting to get arrested. He looks at his BANDAGED HAND, shakes it.

A BUYER, a woman, comes to the counter, smiles at Tyler; he smiles back. MOS while Jack's VOICE is OVER the following: the Buyer looks over a sample bar of soap. She nods, smiles and begins to fill out forms.

JACK (V.O.)

Tyler sold it to the stores at

twenty bucks a bar. God knows what

they charged. We were selling rich

women their own fat back to them.

75.

EXT. STREET - NIGHT

Jack and Tyler march down the sidewalk, full of purpose, like gunfighters heading for a show-down.

TYLER

Look at the guys in fight club.

The strongest and smartest men who

have ever lived -- and they're

pumping gas and waiting tables; or

they're slaves with white collars.

Advertising has them chasing cars

and clothes. A whole generation

working in jobs they hate, just so

they can buy shit they don't really

need.

INT. HIGH SCHOOL HALLWAY - NIGHT

MEN are entering the gymnasium for the testicular cancer support group "Remaining Men Together". Bob starts to file in with the rest, and suddenly, Jack darts forth from the shadows and blocks his way.

Hi.

Hi, Bob.

BOB

JACK

Bob tries to go through the door, but Jack blocks him.

JACK (CONT'D)

Are you really a man?

BOB

Yes.. we all are.

JACK

1. 'm not so sure.
2. ack forcefully pushes Bob. Caught off-guard, he backs into a locker with a bang. Jack slaps Bob's face.

JACK (CONT'D)

Come on, you big moose. Let's see

if you are.

Jack punches Bob in the stomach. Bob puts up his hands to block. Jack throws more punches. Finally, Bob punches Jack in the face, knocking him staggering. Jack comes back and they pummel each other. Bob's face gets redder with anger.

76.

Then, Jack steps back, holding out his hands to signal "stop".

JACK (CONT'D)

Let's take this somewhere else.

INT. BASEMENT - ELECTRONICS WAREHOUSE - NIGHT

The crowd screams insanely as Bob and Jack go at it in the circle of light. Bob's eyes are wild with glee.

EXT. BASEMENT DOOR - ELECTRONICS WAREHOUSE - LATER Everyone quietly sneaks out of the new location -- we've

seen none of these guys before -- this is a new chapter. Jack and Bob stagger out last. They are both dripping blood and covered with bruises -- Jack being in worse shape -- and they both grin with religious serenity.

Bob hugs Jack.

BOB

Thank you. Thank you.

Bob relaxes the hug and Jack drops to the ground like a sack, enervated from the beating he took.

JACK

You're welcome.

JACK (V.O.) (CONT'D)

Fight club -- this was mine and

Tyler's gift -- our gift to the

world.

EXT. STREET - DAY

Ricky grapples with a YUPPIE. They fall to the sidewalk, pounding each other.

YUPPIE

WHO ARE YOU?! WHY DID YOU ATTACK

ME?!

The Yuppie maneuvers Ricky toward a metal fence and insanely tries to impale him on a spike. Tyler and Jack shoot INTO VIEW and grab the YUPPIE, laughing.

YUPPIE (CONT'D)

WHO ARE *YOU*!!

77.

INT. TRUCK GARAGE - NIGHT

Ricky and the Yuppie fight each other while the crowd -- still even more new guys -- cheers.

JACK (V.O.)

We started a fight club for every

night of the week.

CLOSE UP - BUMPERSTICKER

Which reads: "DRUNK DRIVERS AGAINST MOTHERS".

A HAND presses it down in all corners. PULL BACK TO REVEAL - the bumper, THEN the whole car -- a luxury sedan. THEN - the entire PARKING STRUCTURE wherein ALL the bumpers have the sticker.

JACK (V.O.)

We started pulling pranks.

EXT. STREET - LATE NIGHT

Jack, Tyler and Ricky quickly paste up a basic, black-on- white-lettering BILLBOARD. It says: "DID YOU KNOW.. ? YOU CAN USE YOUR OLD MOTOR OIL TO FERTILIZE YOUR LAWN! -- ENVIRONMENTAL PROTECTION AGENCY".

TYLER

We're the middle children of

history, with no special purpose or

place.

We don't have a great war in our generation, or a great depression.

The great depression is our lives. The great war is a spiritual war.

EXT. LARGE PARKING LOT - DAY

Jack and Bob, armed with a toolbox, change the "Enter" and "Exit" signs around. They walk away. In the background, a car drives into the "entrance" and the front tires EXPLODE from the BLADES in the ground.

EXT. SIDEWALK - NIGHT

Jack walks toward an intersection, beyond which is a large CITY PARK.

A group of people are LEAVING A PUBLIC BUILDING in front of him. Marla is among them -- it's a support group adjourning for the night. Jack catches Marla's eye.

78.

He simply smiles and waves. Marla stares at him, deadpan. She turns and walks away, JUST AS..

Tyler STEPS INTO FRAME, looking straight ahead at the park. He signals Jack and they move forward. From out of nowhere, Bob joins them.

EXT. PARK - OUTDOOR BEER FESTIVAL - NIGHT

A bad BAND plays German music. BANNERS advertising American beer are everywhere. People wear shirts and hats with beer ads. Jack, Bob and Tyler sneak up to the side of a portable TOILET. They shove it until it falls against the next toilet. An ENTIRE ROW of portable toilets falls like dominoes. They dart behind a row of trees, then casually walk away.

JACK (V.O.)

We were raised by television to

believe that someday we'll all be

millionaires and movie stars and

rock stars -- but we won't. And

we're learning that fact.

TYLER

And we're very, *very* pissed-off.

INT. AIRPLANE CABIN - ON GROUND - DAY

Two AIRPLANE MAINTENANCE MEN -- with bruised faces -- rip open a box from a PRINT SHOP. They dig up handfuls of AIRLINE SAFETY INSTRUCTION CARDS and begin to inset them into each seat back pouch. We MOVE IN and SEE a card -- it shows passengers SCREAMING and FLAILING ABOUT IN

TERROR.

INT. PAPER ST. HOUSE - KITCHEN - MORNING

Jack, dressed for work, receives a sheet of paper from Tyler.

TYLER

Make two dozen copies. We're going

to have --

INT. PHOTOCOPY ROOM - DAY

Jack stands over a copy machine, getting hit by the flashes of light.

JACK (V.O.)

-- more than one fight club on

every night of the week.

79.

Jack looks around. Other faces illuminated in FLASHES. HALF of them are bruised. He smiles, his eyelids getting heavy and his head nodding.

INT. JACK'S OFFICE - LATER

Jack sits in his cubicle, playing a game on his computer. Boss enters.

JACK (V.O.)

He was wearing a yellow tie. It

must be Thursday. I didn't even

wear a tie to work anymore.

Boss slaps a piece of paper down on Jack's desk.

BOSS

"The first rule of fight club is

you don't talk about fight club".

Jack stares at him stoically.

JACK (V.O.)

I was still half-asleep all the

time. I left the original in the

copy machine.

BOSS

Is this yours? "The second rule of

fight club is you don't talk about

fight club". Is it yours or not?

You don't get paid to abuse the

copy machine.

JACK

"Abuse" the copy machine. What an

image.

BOSS

Let's play pretend. You're me.

You find *this*. What would you

do? Hmm? Make a managerial

decision. What would you do?

Jack slowly rises, walks softly to his office door, shuts it and faces the boss.

JACK

I'd be very careful who I talked to

about this.

(MORE)

80.

JACK (CONT'D)

It sounds like someone dangerous

wrote this, and this buttoned-down

psychotic could probably snap at

any moment and stalk from office to

office with an Armalite AR- 180

Carbine gas-operated semiautomatic.

He's probably at home every night

with a little rattail file, filing

a cross into the tip of every one

of his bullets. This way, when he

pumps a round into.. *someone*.. it

will split along the filed grooves

and spread open the way a dum dum

flowers inside you to blow a load

of guts out through *someone's*

spine. This is probably somebody

you've know for years.

Boss stares at him with a tinge of outrage, a tinge of fear.

JACK (V.O.) (CONT'D)

Tyler's words. Me clowning around.

And I used to be such a nice

person.

Jack's phone RINGS. Jack answers.

JACK (CONT'D)

Compliance and Liability.

MARLA'S VOICE

My tit's going to rot off.

JACK (TO BOSS; BIG SMILE)

Could you excuse me? I need to

take this call.

Boss goes to the office door opens it, stares at Jack a beat, then leaves.

JACK (CONT’D)

(into phone)

What are you talking about?

INTERCUT WITH

CLOSE-UP OF MARLA

In dim light, her face very pretty with make-up.

MARLA

I need you to check and see if

there's a lump on my breast.

(MORE)

81.

MARLA (CONT'D)

I can't afford to blow the cash on

a doctor just to find out.

JACK

I don't know..

MARLA

You're the only one I can turn to.

JACK (V.O.)

She didn't call Tyler. I'm neutral

in her book.

MARLA

Meet me at work.

EXT. MORTUARY - LATE AFTERNOON

Jack goes through the front door.

INT. MORTUARY - SAME

Jack walks into the dim, dramatically-lit foyer. He sees Marla at a

desk. She does not see him. She's wearing a black formal dress --

like a gorgeous angel of death. A VERY FAT MALE CUSTOMER holds an URN the size of an egg cup. Marla studies the urn and the Customer's body with a dreary expression.

MARLA

Sir, you couldn't get the ashes of

your *neck* in here.

The Customer turns and stomps out the door. Jack steps forward to the desk.

JACK

Employee of the month?

Marla looks up at him and smiles.

EXT. MARLA'S HOTEL - SUNSET

Jack watches as Marla takes two boxes from a van with sign "MEALS ON WHEELS".

INT. MARLA'S ROOM - MOMENTS LATER

Marla leads Jack inside.

82.

JACK

You know, this is a sweet side of you.

Think so?

MARLA

JACK

Picking these up for..

(reads off boxes:)

"Mrs. Haniver" and.. "Mrs. Raines". Where are they? Top floor?

MARLA

They're dead. I'm alive and I'm in poverty. You want any of this?

JACK

No, thanks.

Good.

MARLA

He stares at her while she wolfs down food. Marla takes a napkin and wipes her mouth.

MARLA (CONT'D)

This napkin is "one-hundred percent

recycled". So is my toilet paper.

Can you imagine. The worst job in the world -- recycling toilet paper.

INT. MARLA'S ROOM - NIGHT

Marla stands in front of a mirror with her shirt open. Jack stands behind her with his hand on the bottom side of her breast. Her hand guides his.

JACK

Where? Here?

Here.

There?

Here.

Here.

MARLA

JACK

MARLA

JACK

83.

MARLA

Feel anything?

No.

JACK

Jack's head is behind Marla's. His eyes close. Both of them speak more slowly, softer.

Make sure.

MARLA

JACK

Okay. Okay, I'm sure.

MARLA

You feel nothing?

Nothing.

JACK

He almost kisses her neck. Marla turns around, faces him and begins to slowly button up her shirt.

MARLA

Whew. That's a relief. Thanks.

JACK

No problem.

MARLA

1. wish I could return the favor.
2. ack touches his breasts, shakes his head.

JACK

I think everything's okay here.

MARLA

I could check your prostate.

Uh.. nah.

JACK

MARLA

Well, thanks.

Marla kisses him -- and lingers for a bit longer than just friendly.

Jack pulls away.

JACK

Are we done?

84.

JACK (CONT'D)

I gotta go.

Marla's voice turns acid:

MARLA

Yeah, we're done. Get the fuck

outta here.

Jack goes to her door, opens it, looks back at her.

I'm sorry.

JACK

MARLA

GO, ASSHOLE!

EXT. STREET - MOMENTS LATER

Jack walks down the sidewalk. He glances back up at Marla's window as he crosses the street. He sees her. She moves away from the window and -- Jack's BUMPED -- very lightly -- by a PASSERBY -- it's *Tyler*.

TYLER

What are you doing?

JACK

Uh.. I.. was.. coming back from..

a.. thing..

Tyler throws an arm around Jack and leads him down the sidewalk.

TYLER

We need to talk.

INT. BOSS'S OFFICE - DAY

Jack steps into the open doorway and lightly knocks against the frame.

Boss looks up from his large, expensive desk.

JACK

We need to talk.

BOSS

Okay. Where to begin? With your

constant absenteeism? With your

unpresentable appearance? I might

as well tell you now -- you're

going to be put up for review.

85.

THIS NEXT LINE *NOT* IN V.O.:

JACK

I Am Joe's Complete Lack Of

Surprise.

Boss sits up in his seat, becoming enraged.

JACK (CONT'D)

Let's pretend. You're the

Department of Transportation. And

you knew that our company

intentionally left a front seat

mounting bracket that never passed

collision tests? Did nothing about

leather seats -- that were cured in

third world countries with a

chemical we know causes birth

defects? Brake linings that fail

after a thousand miles.

Turbochargers that blow up and cut off legs at the knees. Fuel injectors that burn people alive. All of these accidents where "cause of failure" is stamped "unknown". I know where the bodies are buried.

Call it job security.

BOSS

Just who the fuck do you think you

are?! Get out of here! You're

fired!

JACK

I've got a better idea. You're

going to keep me on payroll as an

outside consultant. In exchange

for my salary, I'll perform the

task of not telling anyone what I

know. I won't need to come into

the office. I can do this job from

home. Call it early retirement,

with pension.

Boss stands, moves around his desk, glaring with rage.

JACK (CONT'D)

Yes, I am shit and crazy, to you

and this whole fucking world, but

1. 'm your responsibility.
2. ack PUNCHES HIMSELF in the nose. Blood starts to trickle down. He punches himself in the jaw, harder.

86.

He throws himself back, acting as if the force of the punch knocked him. His back SLAMS against a framed painting and SHATTERS the glass. He and the frame and the glass and the painting fall to the floor.

JACK (V.O.) (CONT'D)

I Am Joe's Smirking Revenge.

JACK (CONT'D)

Please don't hit me again. Please.

Jack gets back to his feet and punches himself in the stomach, then punches himself in the jaw again. He reels backwards and falls into a hanging shelf, ripping it off the wall, sending it's contents flying.

He falls to the floor again.

JACK (V.O.) (CONT'D)

For some reason, I thought of my

first fight -- with Tyler.

Jack crawls along the carpet toward Boss, dripping blood. He tries to keep up the act, but he sporadically GIGGLES. He grabs Boss's leg.

JACK (CONT'D)

Please.. give me the paychecks like

I asked for. You won't see me

again. You won't have any trouble.

Jack climbs up Boss's leg. Boss, aghast, tries to shake him off, and, in doing so, stumbles back in to his desk, knocking off photos, stacks of paper, paperweights.

JACK (V.O.) (CONT'D)

Under and behind and inside

everything this man took for

granted, something horrible had

been growing.

Jack crawls up high enough to grab Boss's belt and hoist himself up further. He's getting blood all over the Boss's clothes. Jack SMUDGES blood from his face onto the knuckles of both Boss's hands. The horrified man SCREAMS.

JACK (V.O.) (CONT'D)

And right then, at our most

excellent moment, security guards

decided to walk in.

Two SECURITY GUARDS come inside and gape at the sight. Behind them stands a crowd of curious workers, also taking in the sight.

87.

JACK (gurgling blood) (CONT'D) Please don't hit me again. INT. PAPER ST. HOUSE - JACK'S ROOM - DUSK

Jack, all bloody, lies in his bed, asleep. He awakens, hearing the BACK DOOR SLAM. He painfully hauls himself out of bed.

INT. KITCHEN - MOMENTS LATER

Jack enters to see Tyler taking beers out of the fridge. Jack waves a

PAYCHECK.

I did it.

JACK

TYLER

That's fucking great!

Jack sees that Tyler is dressed in combat fatigues. He's splattered with various colors of PAINT. There's a rope and rappelling mechanisms lying on the table.

Tyler nods toward the living room and hands Jack all the beers.

TYLER (CONT'D)

Go on in. We're celebrating.

INT. LIVING ROOM

Jack, a little bewildered, saunters in, carrying the beers. Tyler does NOT follow him. Bob, Ricky and several fight club guys are in front of the TV. They are all dressed like Tyler, all splattered with paint.

Jack hands them their beer. One of the guys is sixteen year old with an angelic face. He notices the TV.

ANGEL FACE

SHHH! They're back to it!

Jack looks at the TV as it shows a LIVE shot of a BUILDING, which is identified at the bottom of the screen as the TRW building. It has a GIANT GRINNING FACE PAINTED on it.

The two EYES are broken, charred windows with SMOKE pouring out. Firetrucks spray water into the windows.

REPORTER

Police Commissioner Jacobs has come

down.. just a second..

(MORE)

88.

REPORTER (CONT'D)

excuse me, could you tell us what

you think this is?

The COMMISSIONER JACOBS, a wrinkled man with baleful eyes, turns to camera.

COMMISSIONER JACOBS

We believe this is related to the

other recent acts of vandalism

around the city. It's some kind of

organized group. And we're

investigating thoroughly.

Jack turns back and sees Tyler in the archway, watching the TV. Tyler pulls back, out of sight. Jack turns to the others.

JACK

What did you guys do?

They all BURST INTO LAUGHTER, look at Jack and shake their heads. Jack just stares at them. Suddenly, the guys' faces turn to stone.

BOB

The first rule of Project Mayhem is

-- you don't ask questions.

Jack stares at them. CUT TO:

INT. HOTEL BALLROOM - NIGHT

A loud, luxurious banquet ensues. Commissioner Jacobs guzzles champagne and puffs on a cigar. Jack, in a waiter's uniform, serving another table, stares at Jacobs. Then, Jack looks apprehensively

toward certain other waiters: Tyler, Bob, Ricky and Angel Face --

mixed in with the mass of waiters.

INT. BATHROOM - SAME

Commissioner Jacobs enters, puffing the cigar, and walks toward a urinal. Jack, Tyler, Bob and Ricky leap out of the corner and attack him. Jack's heart isn't in it -- he barely helps the others. Tyler knocks the cigar out of Jacob's mouth and slaps a piece of tape over it.

INT. SERVICE ELEVATOR - SAME

Jack holds the door while the others drag the struggling Commissioner inside.

89.

They hold him down and pull down his pants. Bob snaps a rubber band, then reaches down to Commissioner Jacob's crotch.

TYLER

Wrap it around the top of his ball

sac.

Ricky holds a knife to Commissioner Jacob's testicles. Jack, red-faced, keeps his distance. Tyler leans in and whispers in the frightened man's ear.

TYLER (CONT'D)

You're not going to continue your

"rigorous investigation". You're

going to publicly state that there

is no underground group. Or --

imagine, the rest of your life with your ball sac flapping empty.

COMMISSIONER JACOBS

No. Please. Stop. Please.

TYLER

One to the *New York Times* and one

to the *Los Angeles Times*. Press

release style. Remember this. The

people you're after are everyone

you depend on. We're the people

who do your laundry and cook your

food and serve your dinner. We

guard you while you sleep. We

drive the ambulances. We process

your insurance claims. We control

every part of your life. So don't

fuck with us.

Ricky makes a dramatic cut with the knife -- he holds up the severed

RUBBER BAND.

EXT. HOTEL - LATER

Jack, Tyler and the others file quickly out the back service entrance.

Tyler slaps Angel Face's back. Angel Face smiles at him. Everyone splits up in different directions.

90.

INT. BASEMENT - NIGHT

Fight club in full swing. Jack squares off with Angel Face. He BEATS the SHIT out of Angel Face with a viciousness

heretofore unseen. The crowd shouts maniacally, save for Tyler, who watches with an inscrutable stone face.

Angel Face tries to speak, but Jack pounds him too hard. Blood flies everywhere. The crowd becomes QUIETER. Finally, Angel Face, on the floor, is clearly unconscious. Jack stops, stares at him, numb. The crowd seems a little spooked. Tyler scans the faces, looks at Jack.

EXT. STREET - LATER

Tyler and Jack walk through pools of streetlight.

JACK

I felt like destroying something

beautiful.

Excellent.

TYLER

An idling car HONKS. Tyler leads Jack toward it. A bruise- faced VALET PARKER throws keys to Tyler.

VALET

There you go, Mr. Durden.

JACK

After you, *Mr. Durden*.

INT. STOLEN CAR - MOVING - LATER

RAIN GUSHES down. Tyler drives. Jack sits slumped in the passenger seat. They are BARRELING down a two-lane HIGHWAY, intermittently illuminated by oncoming headlights. Jack stews in silence. Tyler glances at him.

TYLER

What's the problem?

JACK

Nothing. Why wasn't I told about

"Project Mayhem"?

TYLER

You *were* told about it.

JACK

Uh-huh. Yeah. Fine. If you can't

talk to me about it..

91.

TYLER

That's the whole point -- you *don't* talk about it.

JACK

So, I can't even ask?

TYLER

What do you want me to say? That Project Mayhem will knock over the pillars of civilization like dominoes? That it's going to bring about a prematurely-induced dark age? Should I E-mail you? Should I put this on your "action item list"?

Fine.

JACK

TYLER

Recognize the make and model of

this car?

JACK

Yeah -- so what?

TYLER

The front seat mounting bracket

never passed collision tests.

Tyler pulls the car into the opposite lane. HEADLIGHTS in the distance get closer very, very quickly.

JACK

What are you doing?!

The oncoming car gets closer and closer, honking and flashing it's lights. Jack tries to grab the wheel. Tyler uses one arm to pin down Jack's arms. He uses one hand to steer.

JACK (CONT'D)

TYLER! WHAT THE FUCK ARE YOU

DOING?!!

TYLER

If you died right now, how would

you feel about your life?

JACK

I WOULD FEEL NOTHING ABOUT MY LIFE!

IS THAT WHAT YOU WANT TO HEAR?!

92.

TYLER

I want to hear the truth.

The car swerves at the last second.

JACK

Fuck my life. Fuck fight club!

Fuck you and fuck Marla. I'm sick

of this shit! How's that? Huh?

TYLER

You don't have any concept of what

it is to hit bottom.

An oncoming TRUCK honks and flashes it's lights. It moves to the other side of the road. Tyler steers there, too. The truck moves back; Tyler moves back. More honking and flashing. The truck moves; Tyler moves.

TYLER (CONT'D)

HITTING BOTTOM ISN'T A WEEKEND

RETREAT! IT'S NOT A SEMINAR! ONLY

AFTER YOU'VE LOST EVERYTHING ARE

YOU FREE TO DO ANYTHING! YOU SEE,

YOU LISTEN, BUT YOU DON'T GET IT!

YOU HAVE TO FORGET EVERYTHING YOU

KNOW, EVERYTHING YOU THINK YOU

KNOW!

Just seconds to impact with the oncoming truck and -- Tyler swerves.

Now the car heads straight for a STALLED CAR on the side of the road, surrounded by flares. Jack stops struggling to get his arms free.

JACK

I am nothing in the world compared

to you. I am helpless. I am

stupid and weak and all I do is

want and need things. I *am* my

little shit job. I *am* my condo

and my Swedish furniture. I am

SHIT!

Tyler lets go of Jack's arms and lets go of the steering wheel. He and Jack look at each other as their car barrels toward the stalled car.

Their faces are illuminated by the light of the flares. They SMASH into the stalled car. Both airbags inflate, but

the front seat LURCHES forward, loose, causing the men's legs to bang against the dash.

93.

Tremendous momentum makes the back of the car whip around and carry it into a ass-over- teakettle ROLL down the hill.

JACK (V.O.) (CONT'D)

I'd never been in a car accident.

This was what all those statistics

felt like before I wrote them into

my reports.

INT. FAMILY CAR (JACK'S IMAGINATION)

The car that Jack saw, post-wreck, in the warehouse, FLAMING, tumbling END over END; the FATHER, MOTHER TEENAGE GIRL and BABY all SCREAMING.

INT. TYLER'S STOLEN CAR - RESUMING

The hill goes on further and further -- it's a deep RAVINE. The car finally hits the bottom, lying on its roof.

EXT. OVERTURNED CAR

Tyler crawls out and goes around, opening Jack's door. He drags Jack out into the mud. He grabs Jack's face and squeezes it, shaking it.

TYLER

You just had a near-life

experience.

INT. JACK'S BEDROOM - LATE NIGHT

Jack lies in bed, staring at the ceiling. Tyler sits in a chair, next to the bed, speaking softly.

TYLER

The world I see -- you're stalking

elk through the damp canyon forests

around the ruins of Rockefeller

Center. You wear leather clothes

that will last you the rest of your

life. You climb the wrist-thick

vines that wrap the Sears Tower.

You see tiny figures pounding corn

and laying strips of venison on the

empty car pool lane of the ruins of

a superhighway.

INT. JACK'S BEDROOM - DAWN

Jack lies in bed, staring at the ceiling. Tyler is gone. Faint sounds of SAWING and HAMMERING.

94.

INT. KITCHEN - MOMENTS LATER

Jack sits at the table, sipping coffee. He's pale, dazed. He seems broken. He hears the faint sounds of sawing and hammering again; he's unsure of where they're coming from. He glances out the window, sees nothing.

Marla walks into the kitchen. Jack looks up at her. She looks at him, unsmiling. There's a bruise on her face and arm. She pours herself a coffee and lights a cigarette. A beat of silence, then:

MARLA

I'll be out of your way in a sec.

She seems to be as weak as Jack.

JACK

You.. don't have to.. rush off.

MARLA

Sarcastic prick.

JACK

No, really..

Marla's eyes drift away from his. Jack gets up, tries to move closer to her. She pulls away. He retreats and they wind up on opposite sides of the room. Jack leans against the wall near the BASEMENT DOOR, which is AJAR.

JACK (CONT'D)

Why are we both.. caught up like

this.. with..?

JACK (V.O.) (CONT'D)

I came so close to saying Tyler's

name, I could feel it vibrate

inside my mouth.

Marla looks at him curiously, waiting.

JACK (CONT'D)

Why does a weak person go out and

find a strong person to.. hang

onto?

MARLA

It's a real sick relationship. You

don't think I know it?

JACK

Does it *have* to be?

95.

Does it?

MARLA

Faint sound of sawing and hammering. Jack can't quite figure where it's coming from.

JACK

You hear that?

Hear what?

MARLA

JACK

That.. sawing and hammering.

MARLA

We have to change the subject?

Have we been talking too long?

JACK

I just don't understand what you

get out of such a sick

relationship.

MARLA

What the hell do *you* get out of

it?

Jack turns and sees, through the slim space of the open door, Tyler, at the bottom of the basement stairs, staring a silent warning. Jack turns back to Marla.

Nevermind.

JACK

MARLA

No. That day you came over to check my breast..

JACK

Let's just stop right here.

MARLA

Come on! You *want* to pull yourself out of whatever you're stuck in.

Marla moves slowly toward Jack.

JACK

Conversation over.

96.

Marla strokes Jack's hair. She sees the kiss-scar on his hand. She grabs his hand and studies it. Jack tries to pull it back, but Marla keeps a tight grip.

MARLA

What is that?! Who did that?!

JACK

... A person.

MARLA

Guy or girl?

JACK

Why would you ask if it's a guy or

a girl?!

MARLA

Why would you get bent if I asked?!

Go.

JACK

MARLA

What does it mean? You're afraid to say?

Go! Go!

JACK

Marla kisses Jack's hand, putting her lips right onto the scar, leaving an imprint of lipstick. Jack jerks his hand away from her. He tries to wipe off the lipstick and it smears. He unconsciously licks it off.

MARLA

MMMMMMMMMM.. Swallow it.

JACK

Get the hell out of here!

Stung, Marla stomps toward the back door.

MARLA

Go fuck yourself -- that's probably

how you like it best.

And out she goes. Jack watches her stomp through the backyard and out to the sidewalk. Tyler comes up from the basement, passes Jack and goes through the archway. Sound of his footsteps going up to the second floor. Jack goes down the basement steps.

97.

INT. BASEMENT - CONTINUOUS

TRIPLE-DECKER BUNKS clutter the basement, as many as can fit into the space.

JACK

What's this for?

>From upstairs, the sound of the DOORBELL.

INT. LIVING ROOM - MOMENTS LATER

Jack opens the door. Ricky stands on the porch, staring blankly ahead in subordinate military style. He's dressed in black pants, black shirt, black shoes. He holds a brown paper bag. An army surplus mattress sits in a tied-up roll at his feet.

Jack is about to say something, when Tyler steps past Jack and speaks very softly to Ricky:

TYLER

I'm sorry. You're too young to

train here.

Tyler steps back inside and shuts the door.

JACK

"Train" here?

TYLER

He's not. If the applicant is

young, we tell him he's too young.

Old, too old. Fat, too fat.

Why?

JACK

TYLER

This is how Buddhist temples tested applicants going back for bah- zillion years. If the applicant waits at the door for three days without food, shelter or encouragement, then he can enter and begin training.

JACK

Begin training?

Tyler grins at him.

98.

EXT. PORCH - MOMENTS LATER

Jack bursts out the door, faces Ricky.

JACK

GET OUT OF HERE! GO! HE TOLD YOU

YOU'RE TOO YOUNG! GET OUT!

1. t's clear there will be no response from Ricky, who's like a statue.
2. ack goes back inside, closes the door.

EXT. PORCH - NIGHT

Ricky stands in the same spot. Jack bursts out with a broom, knocks the brown paper bag out of Ricky's hand, kicks it off the porch. Ricky remains in place, motionless.

JACK

ARE YOU STUPID?! I TOLD YOU TO GET

OUT OF HERE! YOU'RE NEVER GETTING

INSIDE THIS HOUSE!

EXT. PORCH - MORNING

Ricky in the same spot. Tyler slinks out the front door, smiling.

TYLER

I'm sorry about the

misunderstanding. Look, friend,

it's not the end of the world.

Just go away. Nothing personal,

but I'm going to have to call the

police. You're trespassing.

EXT. PORCH - NIGHT

Ricky, same spot. Jack bursts outside with the broom again. He WHACKS Ricky in the shoulder.

JACK

YOU'RE NEVER GETTING THROUGH THIS

FUCKING DOOR, YOU STUPID LITTLE

WEASEL!!

INT. JACK'S ROOM - LATER

Jack drinks a beer, smokes a cigarette and stares down at the PORCH, which he can see from a sideward//downward angle. Ricky stands in the same spot.

99.

JACK (V.O.)

Sooner or later, we all just became

what Tyler wanted us to be.

EXT. PORCH - MORNING

Ricky's in the same spot. Next to him now is Bob, dressed in black with brown paper bag and Army surplus mattress. Tyler steps out the front door. Jack lights in the doorway, locking eyes on Bob.

TYLER (TO RICKY)

Get your stuff.

(to Bob)

You're too old to train here.

1. orry.
2. yler and Ricky go inside and Tyler slams the door.

INT. 2ND FLOOR LANDING - LATER

Jack stands in the open bathroom doorway, watching Tyler SHAVE off all of Ricky's HAIR. When he's done, Tyler gives the top of Ricky's head a sharp slap.

TYLER

A monkey, ready to be shot up into

space, ready to sacrifice himself

for Project Mayhem.

And, so, all those with shaved heads will henceforth be termed "SPACE MONKEYS".

EXT. PORCH - LATER

Jack looks out the window. Bob continues to stand, motionless. Ricky comes out the front door with the broom.

RICKY

YOU'RE TOO FUCKING OLD! GET OUT OF

HERE!

Ricky WHACKS Bob with the broom several times, then goes back inside,

SLAMMING THE

DOOR. CUT TO:

EXT. PORCH - NIGHT

CLOSE ON JACK'S FACE, staring out the window.

100.

VOICE

YOU'RE TOO SKINNY! GET OUT OF

HERE!

FULL BACK TO REVEAL a SPACE MONKEY we've never seen before, with the shaved head, whacking a SKINNY APPLICANT with the broom.

INT. LIVING ROOM - SAME

Jack pulls back from the window. SPACE MONKEYS, all dressed in black, all with shaved heads, are ALL OVER THE PLACE. There are tables set up for them to wrap bars of soap. Jack lopes into the

INT. KITCHEN - CONTINUOUS

Where Space Monkeys render fat and make soap. Several, off to the side, stir a large vat of RICE. One of them recites a memorized statement:

FRECKLED SPACE MONKEY

"You are not a beautiful and unique

snowflake. You are the same

decaying organic matter as

everything else. We are all part

of the same compost pile."

JACK (V.O.)

Planet Tyler Jack dips a spoon into

the rice vat and chomps on some

rice in an irritable way.

JACK (V.O.)

It could be worse. I could get hit

by lightning and my head could burn

down to a smoldering baseball and

my zipper could weld shut.

HE MOVES BACK OUT TO THE

INT. LIVING ROOM - CONTINUOUS

And tromps up the steps to the 2nd floor landing.

INT. TYLER'S ROOM - CONTINUOUS

Jack enters. Bob reads a book and makes marks on a chart. All along the floor are baskets; each one is labeled with a number in sequence:

"1, 2," etc. The first ten are under a sign that says "WILMINGTON".

101.

Then, there's a sign over some that says "NEW YORK", then "CHICAGO", and other cities. There are dozens of BOOKS on FINANCE. Jack looks in basket number "1" and sees the word "CITIBANK" at the top of a page.

He starts flipping through it; then the next basket.

Bob grabs Jack's hand and leads him away from the baskets.

BOB

The first rule of Project Mayhem is

you don't ask questions.

JACK

This is me, Bob. Tyler's been gone

for over a week. What the hell is

going on?

BOB

The first rule of Project Mayhem is

you --

Right.

JACK

Jack leaves the room.

INT. KITCHEN - MOMENTS LATER

Jack barges in among the laboring Space Monkeys. They pinch herbs into the soap mix. They also use vodka. Jack grabs a bottle of vodka and takes a long pull off it.

JACK (V.O.)

I had to hug the walls, being a

mouse trapped inside this clockwork

of space monkeys, cooking and

working and sleeping in teams. The

house became a living thing, wet on

the inside from so many people

sweating and breathing. So many

people moving, the house moved.

The PHONE RINGS. Jack snatches it. All the Monkeys stare at him.

JACK

Project Mayhem.

TYLER'S VOICE

Don't answer the phone like that.

Jack turns away from the others, moves to a corner, talks sotto voce.

102.

JACK

Tyler! Where have you been?

TYLER'S VOICE

Don't ask questions.

There's a tense pause.

JACK (V.O.)

I Am Joe's Broken Heart because

Tyler dumped me. Because I'm just

another cog..

TYLER'S VOICE

Be quiet and listen.

Jack reacts with surprise -- did Tyler hear his thoughts?

TYLER'S VOICE (CONT'D)

I'll tell you everything when I get

back. Right now, you gotta do

something for me.

Me? When?

Tonight.

JACK

TYLER'S VOICE

EXT. FRONT PORCH - LATER

Jack, Bob, and two other Space Monkeys step out the front door, laden with boxes and equipment.

SKINNY SPACE MONKEY

"We are the all-singing, all-

dancing crap of the world".

The group of four steps off the porch and heads for a VAN. EXT. PARK - NIGHT

A piece of ART adorns the top of a hill: a metal TOWER, wide at the base and a hundred feet high, in design somewhat similar to the Eifel Tower. At the top is a giant GLOBE made of circular poles and wires.

Jack, Bob and the other two monkeys attach the explosive packets to the globe; wire the packets together; use sandbags to cover the packets.

103.

EXT. PARK - LATER

The group of four huddle behind some bushes, staring at the globe. Bob holds a small metal electronic box with a button -- a detonator. He presses the button.

A RAPID SERIES of EXPLOSIONS runs from the base of the tower to the top, along the four main structural supports. They are contained, shaped blasts. The tower crumbles straight down. Bob turns to smile at Jack.

BOB

Exactly the way it was supposed to

work.

The globe falls free, bangs into the top of the hill and begins to roll. When it gets to the street, it bounces onto the top of a parked LIMO -- and becomes a FLAMING, raised "GUTTERBALL" -- it never hits the street -- it rolls over one parked limo or expensive luxury car after another, crunching the roofs, causing the windows to explode outward.

Fifty cars get this treatment.

Then, it arrives at the lobby of a HOTEL, BROADSIDES a couple of limos, CAROMS off them, TURNS and rolls directly into the front of a large

(closed) STARBUCKS, SMASHING DOWN the windows and the front door and setting the place ON FIRE.

EXT. PARK - AERIAL VIEW

As Jack, Bob and the two other Monkeys FLEE, LAUGHING hysterically at their handiwork. They split up and move in different directions.

MOVE IN ON JACK, sprinting, keeping hidden by bushes. SIRENS can be

heard. He's stripping off his ski mask, his gloves, his combat gear --

as he runs. Underneath are street clothes.

JACK (V.O.)

In that moment I "clicked". I

became what Tyler wanted. I was

his limb, his appendage -- an

extension of his will, nothing

more. And he knew it. I could

feel him knowing it.

104.

Jack dumps the wad of clothes into a trashcan and pulls up the surrounding trash to cover them. He breaks into a sprint again, heading for the edge of the park.

GUNSHOT. Jack's smile fades. He stops, looks toward the direction from which the sound came. He turns, heads down along a row of hedges.

HE COMES TO A

INT. CONCRETE STAIRCASE - CONTINUOUS

And moves to the top step, looking down. A COP is near the bottom, running down to the sidewalk. Next to a STREETLAMP LIES a ONE of the MONKEYS in full combat attire and ski mask. The body is MOTIONLESS, SPRAWLED. In the hand is the DETONATOR -- looking somewhat like a gun.

The Cop pulls off the ski mask, revealing the DEAD FACE of Bob, a BULLETHOLE through the head.

Jack flinches backwards as if punched in the stomach. He gasps for breath. The Cop looks up and catches sight of Jack. He lifts his gun and his PB radio. Jack jerks back out of sight.

EXT. PARK - CONTINUOUS

Jack hobbles along. Nearby, from beyond a hedge, he hears the crackling of a PB with a VOICE coming from it. Then:

COP'S VOICE (INTO PB)

Yeah. We found some clothes.

Jack, sweating like a pig, picks up his pace and heads for the edge of the park.

EXT. PAPER ST. HOUSE - NIGHT

Jack, panting, white as a ghost, trembling, approaches from the sidewalk. He sees the front door open and four Space Monkeys come out, carrying LUGGAGE.

BIG-EARED MONKEY (A SOLEMN CHANT)

We are now the..

OTHER MONKEYS & BIG-EARED (UNISON)

... right hands of Tyler Durden.

Jack steps up onto the porch and sees that they are all holding FLIGHT COUPONS. Jack notices that all of them have the KISS-SCAR on their left hands. They ignore him with military demeanor and walk down to the sidewalk and head for the bus stop.

105.

JACK (V.O.)

Under and behind and inside

everything I took for granted,

something horrible had been

growing.

INT. LIVING ROOM - CONTINUOUS

Jack walks inside to see a Space Monkey, BEET-RED but silent, holding out his hands while LYE BURNS the inside of the TOPS of his FINGERS.

Other Monkeys sit and await the process.

JACK (V.O.)

They were using lye to burn off

their fingerprints.

INT. TYLER'S ROOM

Jack barges into the room, goes to the desk and rifles through drawers.

His elbow bangs against the top of an ANSWERING MACHINE. It plays MESSAGES.

MARLA'S VOICE

Look, don't get bent, okay? But..

there's a therapist that I think

could really help you. Give me a

call. Okay?

Click. Next message:

DETECTIVE STERN'S VOICE

This is Detective Stern with the

arson unit. I've called four times

in the last two days. I need you

to come in for some further

questioning.

Jack shivers, snaps OFF the machine, then more furiously continues his search. He finally finds flight coupons -- both used and unused. The used ones have the flight information, including the destination cities. He stuffs all of them into his pocket.

CLOSE SHOT: SIGN: "LAGUARDIA INTERNATIONAL AIRPORT". INT. BAR - NIGHT

Jack walks in and sees several MALE PATRONS with FIGHT BRUISES. Jack goes to the bar, sidles next to the bruised men and the BRUISED BARTENDER. They stare at him.

106.

JACK

This is an emergency. I'm looking

for Tyler Durden.

BRUISED PATRON

Never heard of him. Sir.

He and the other bruised patrons and the bartender WINK at Jack and crack slight smiles.

MONTAGE - DAY &

NIGHT:

"WELCOME TO" AIRPORT SIGNS -- Atlanta, Chicago, Dallas, Phoenix, Los Angeles".

FACES -- bruised, smiling, tight-lipped.

JACK (V.O.)

In every city, I branched out from

the airport to downtown and checked

1. There was always a fight
2. Tyler was setting up

franchises, all over the country.

INT. ANOTHER BAR - NIGHT

Jack walks in and sits at the bar. The BARTENDER wears a NECK BRACE and has a black eye.

BARTENDER

Welcome back, Sir. No one's in

here. It's always empty the day

after fight club.

JACK

Talk to me. Have you ever met

Tyler Durden?

BARTENDER

Is this a test, Sir?

JACK

Yeah, it's a test.

BARTENDER

You were in here last Thursday

night. You were standing right

there, asking me about how good our

security is. And it's tight as a

drum.

JACK

Who do you think I am?

107.

JACK (V.O.) (CONT'D)

Please return your seatbacks to

their full upright and locked

position.

BARTENDER

You're the person who did *this* to

me.

The Bartender shows Jack his hand -- it has the kiss-shaped scar.

BARTENDER (CONT'D)

You're Tyler Durden, Sir.

INT. HOTEL ROOM - NIGHT

Jack bursts inside, runs to the phone, punches a number. He doesn't bother to turn on the lamp.

INTERCUT WITH

INT. MARLA'S ROOM - SAME

Marla answers the phone.

Yeah?

MARLA

JACK

It's me. Have we ever had sex?

MARLA

What kind of stupid question is that?!!

JACK

Is it stupid because the answer's "yes" or because the answer's "no"?

MARLA

Is this a trick?

JACK

Will you just answer, for God's sake?!

MARLA

Oh, you mean, you want to know if I think it was "making love" or just two animals going at it?

JACK

So we *did* make love?

108.

MARLA

Is that what *you're* calling it?

JACK

ANSWER THE QUESTION!!!

MARLA

You fuck me, then snub me. You love me, you hate me, you show your sensitive side, you turn back into an asshole!

Oh, God.

JACK

MARLA

Is that a pretty accurate

description of this relationship?

JACK

What's my name?

MARLA

Tyler Durden.

JACK (V.O.)

We've just lost cabin pressure.

MARLA

I'm coming over.

As Marla hangs up, we END INTERCUT. Jack stares at the receiver a beat, then realizes..

JACK

Oh, shit! No! I'm out of town!

He punches Marla's number like a maniac. Listens.. just ringing and ringing. He turns, sees TYLER -- sitting on the bed, staring at him with an ominous poker face. Jack drops the receiver. The room is only lit by dim moonlight through the window.

TYLER

You broke your promise.

JACK

Why do people think I'm you?

TYLER

Because we happen to share the same

body.

109.

JACK

What the hell are you talking

about?

TYLER

Sometimes *I* control it and you

imagine watching me.

INT. BAR BASEMENT - NIGHT (JACK'S MEMORY)

Jack stands near the back of the crowd as Tyler stands in the middle of the light.

TYLER

The first rule of fight club is --

JUMP CUT - SAME SHOT - (ALTERED FLASHBACK) -- it's JACK in the light, talking, behaving like TYLER.

JACK

-- you don't talk about fight club.

INT. HOTEL ROOM - RESUMING

Jack gasps and wheezes. Tyler grins and nods.

JACK

But we fought --

TYLER

When *you're* controlling the body,

you see me and hear me. But no one

else does.

INT. AIRPLANE CABIN - IN FLIGHT - NIGHT (ALTERED FLASHBACK) Jack sits next to an empty seat and "looks" at the blank air

beside him, eyes focusing on "someone" close.

JACK

What do you do Tyler?

(pause; listens to reply)

1. mean -- for a living.
2. ack listens to the reply, then laughs.

INT. HOTEL ROOM - RESUMING

Jack has trouble catching his breath.

JACK

What about when we were together

around other people?

110.

TYLER

You never talked.

EXT. PARK - NIGHT (ALTERED FLASHBACK)

Jack (Tyler) has his face right in front of the Police Commissioner's.

JACK ("TYLER")

We'll send one ball to the "New

York Times" and one ball to the

"Los Angeles Times". Sort of press

release style.

INT. HOTEL ROOM - RESUMING

Tyler sits down on the bed, takes Jack's hand. He presses his lips to the kiss-scar.

TYLER

And when you fall asleep, I go

places and do things without you.

EXT. BUILDING (FLASHBACK)

We see that the building is "TRW". Jack, Bob, Ricky, Angel Face and another GUY rappel down the die and start SPRAYING PAINT. Everyone is more or less paired off. Jack IS "TYLER" in his demeanor, mannerisms, speech. He's next to Angel Face.

JACK ("TYLER") (TO ANGEL FACE)

You are not your job. You are not

how much money you have in the

bank.

Suddenly, the TWO WINDOWS SHATTER OUTWARD and two of the men yell out the windows:

BRUISED MAN #1

I AM NOT MY JOB!

BRUISED MAN #2

I AM NOT HOW MUCH MONEY I HAVE IN

THE BANK!

INT. HOTEL ROOM - RESUMING

Jack shakes his head in disbelief.

JACK

But you.. you.. you rent the house.

111.

TYLER

The house is rented in your name.

JACK

You're a projection? A personality

disorder? A psychogenic fugue

state?

TYLER

Fuck that. You're *my*

hallucination.

JACK

(points to his body)

I was here first.

TYLER

Who's done more with it?

JACK

You're not going to do any more

with it.

TYLER

What are you going to do? You

couldn't even figure this out.

TYLER (CONT'D)

It's been staring you in the face

for months. I had to drop my busy

schedule and come here and tell

you. How are you going to fuck

with me? You think there's any

possibility that I haven't prepared

for? Do you think anyone you care

about is safe?

Jack quivers with shock, shaking his head, sweating more profusely.

JACK

No. This is all.. it's not

possible. Tyler. Tyler.. it's a

joke, right? Right?

Jack FAINTS and falls to the floor, UNCONSCIOUS.

INT. HOTEL ROOM - DAY

Jack's eyes snap open. He shoots to his feet.

Tyler.. ?

JACK

112.

He remembers the revelations of the previous night.. he looks at himself in the mirror. A sledgehammer of emotions hits him. He looks at the clock -- 1:35p.m.

BAM!

INT. HALLWAY

The room door slams against the wall as Jack bursts out of the room, SPRINTING for the stairs. Fuck the luggage.

INT. STAIRWELL

Jack takes three steps at a time.

INT. LOBBY

Jack storms for the front door, passing the length of the front desk.

A DESK CLERK calls out to him.

SIR?!

DESK CLERK

Jack catches sight of the Clerk, who waves a piece of paper.

DESK CLERK (CONT’D)

Please initial the list of phone

calls.

Jack snatches the bill and looks at it. There's a MASS of PHONE

NUMBERS.

JACK

When were these made?

DESK CLERK

It says right there, Sir. Between

two a.m. and five thirty a.m.

Jack grins. He initials the bill. The Clerk gives him a copy. Jack stuffs the bill into his pocket and disappears out the door.

INT. AIRPLANE CABIN - IN FLIGHT - DAY

Jack sits, staring out the window, his face set hard.

EXT. AIRPORT DRIVE - SUNSET

Jack sprints to the curb and leaps onto a taxi.

113.

EXT. MARLA'S HOTEL - SUNSET

The taxi pulls to a halt by the curb. Jack leaps out and runs up the front steps.

INT. HOTEL STAIRS - CONTINUOUS

Jack sprints up the steps, taking two or three at a time. He gets to a landing and turns and runs down to the end of the

INT. HALLWAY

Where he pounds on Marla's door. She opens it. He endures her baleful gaze for a beat.

MARLA

Your whacked-out, bald feaks threw

me out of the house. I thought

they were going to kill me. They

almost broke my arm.

JACK

1. 'm sorry, I..
2. ack takes both her hands in his.

JACK (CONT'D)

Marla, I'm going to tell you

something and it's going to take a

tremendous act of faith on your

part to believe me.

MARLA

Here comes an avalanche of

bullshit.

JACK

-- A little *more* faith than that.

Spill it.

MARLA

INT. MARLA'S ROOM - CONTINUOUS

Jack leads her toward the bed.

JACK

Look, did you notice a big difference between me when we were having sex and when.. we weren't?

114.

MARLA

Did I notice? You're manic-

depressive. It's like a neon sign

all over you.

JACK

No. It's worse than that.

Jack sits on the bed, pulling Marla down next to him. They and the sheets and covers SLIDE OFF onto the floor. Jack keeps his composure and looks into her eyes.

JACK (CONT'D)

Tyler is my split personality.

MARLA

Then, who are you?

Jack takes out his wallet, shows Marla his driver's license.

MARLA (CONT'D)

You gave me a fake name? What a

jerk.

JACK

*I* didn't give you the fake name --

a *fake person* did. Listen, those

people all over the house -- you're

in danger.

MARLA

Okay, what do you want? You want

me to create my own wonder-bitch

personality to match? So we can be

a foursome?

JACK

I WANT YOU TO FUCKING BELIEVE ME!!

JACK (CONT'D)

YOU WANTED TO TALK?! WELL,

*HERE'S* OUR FUCKING TALK!!!

Jack's eyes well up with tears. He turns away from her. Marla's face softens. She strokes Jack's hair, turns his face to look at her.

MARLA

I'm sorry. This split personality

thing is..

A beat of silence. She squeezes his hand; he squeezes back. He looks at her, working up some nerve.

115.

JACK

I've go to know something. Why did

you respond to Tyler? Instead of

me. Sexually.

MARLA

I.. uh.. I don't know what to say --

*you're* Tyler.

JACK

Okay, however you want to say it --

the abusive side of me -- the

asshole who treated you like shit

and made you leave in the morning.

MARLA

What do you want? You want me to

say I'm shit and I deserve to be

treated like shit? Well, I AM!

And that's how you GOT ME OFF!! AND

YOU *KNOW IT*!!!

Jack touches her face and she slaps his hand away. He sighs and gets to his feet. He pulls out an airline FLIGHT COUPON and shows it to her.

JACK

I want you to get out of town for

awhile. Whether you believe me or

not, you're in *real* danger. Is

there someplace you can go?

Marla grabs the flight coupon, looks it over.

MARLA

There's plenty of places I'd like

to go.

Jack digs into his pocket and produces a wad of cash. Marla roughly seizes the cash, checks out the amount.

JACK

Leave as soon as possible. Go to a

rural little town, away from any

major city. Go now. Okay?

Please. Promise?

MARLA

Count on it. And I'm not paying

this back -- I consider it "asshole

tax".

JACK

I agree. More than you know.

116.

Marla's expression of rage becomes muddled with confusion over Jack's almost spiritual tenderness. Jack starts toward the door. A WAVE OF DROWSINESS and FATIGUE hits him. He staggers, eyes closing. He drops onto a chair for a beat and rests his hand over his face.

He SNAPS AWAKE. Marla is GONE. Jack bolts up out of the seat.

Marla?!

JACK (CONT'D)

INT. HALLWAY

Jack leaps out of the room, looks down the hall in both directions.

Marla?!

JACK

EXT. PAPER STREET - SUNSET

The taxi screeches to a halt. Jack leaps out.

Wait here.

JACK

INT. PAPER ST. HOUSE - MOMENTS LATER

Jack walks inside to find it completely EMPTY and DESERTED. He gawks at the bathtub and canisters that hold vast amounts of liquid. He sees bottles labeled "nitric acid". He TIP- TOES to the

INT. KITCHEN

And picks up the phone. He pulls out the hotel bill and scans the phone numbers. Through the window, the LAST bit of SUNLIGHT slowly SINKS.

Jack punches the first number.

VOICE (FROM PHONE)

Maintenance.

A brief silence while Jack absorbs this and adjusts.

JACK

Uh, excuse me. I'm not sure I have

the right number. I've been

calling maintenance departments all

over the city, regarding the water

supply. Which maintenance

department is this?

117.

VOICE

Very good, Sir.

Excuse me?

JACK

VOICE

Don't worry about us, Sir. We're

solid.

Jack hangs up the phone. He punches the next number.

DIFFERENT VOICE (FROM PHONE)

Maintenance.

JACK (IMITATING TYLER)

Give me your position.

DIFFERENT VOICE (BAFFLED)

Huh? Who's this?

JACK

Oh, excuse me. I'm calling from

the water company. I've mixed up

my phone numbers. Which

maintenance department am I talking

to?

DIFFERENT VOICE

You almost had me there, Sir.

Everything's A-okay here.

Jack hangs up the phone. He punches the next number.

ANOTHER DIFFERENT VOICE (FROM PHONE)

Maintenance.

Jack hangs up; punches the next number.

YET ANOTHER DIFFERENT VOICE (FROM PHONE)

Maintenance.

Jack hangs up; punches the next number.

EVEN YET ANOTHER VOICE

(from phone)

Maintenance.

A beat while Jack thinks.

JACK

There's been a change in the plan.

118.

EVEN YET ANOTHER VOICE

You told me you'd say that, Sir.

JACK

I don't care what I told you --

there's *really* a change of plan!

EVEN YET ANOTHER VOICE

You told me you'd say *that*, too,

Sir.

JACK

Now, listen to me, you stupid fuck!

I've got the phone numbers mixed

up! Tell me where you are! Now!

EVEN YET ANOTHER VOICE

This is a very good test, Sir. You

sound like you mean it.

Jack hangs up the phone and KICKS IT. He flushes red, looks around at passersby. He lifts the receiver again and punches the next number on the hotel bill.

SCRATCHY VOIC

(from phone)

Mason Industrial Electronics.

JACK

This is Tyler Durden.

SCRATCHY VOICE

(harsh whisper)

Are you outta your fucking mind?!

What the fuck are you doing,

calling me in the daytime?!

JACK

I.. have some questions about..

SCRATCHY VOICE

Jesus! I showed your guys how to

use it! A four-year-old could take

that shit and break through any

security system in the world! If

you can't then fuck you, moron!

Now, don't ever call me again!!

Click. Disconnect. Jack looks at the receiver, hangs it up.

EXT. LOU'S TAVERN - NIGHT

Jack gets out of the cab, turns to the CABBIE.

119.

JACK

I gotta have you wait again. Leave

the meter running.

The Cabbie grins.

CABBIE

There's no charge, Mr. Durden.

Jack gawks at him, backs away.

INT. LOU'S TAVERN - SAME

Jack darts inside and signals to Irvine. Irvine comes out from behind the bar and he and Jack move to a corner. Other men with BRUISED FACES turn and watch them.

JACK

Look, I need to know where the

nitroglycerin was taken.

Irvine scowls at him a beat, then slowly smiles.

IRVINE

Right, Mr. Durden.

JACK

This isn't a test. There's been a

mix-up.

IRVINE

You told me you'd say that.

JACK

Where are all the maintenance

departments?!

IRVINE

You told me you'd say that, too.

Jack bristles with rage. He grabs Irvine's shirt collar.

JACK

Did I tell you I'd call you a

motherfucking asswipe dickhead?!

IRVINE

Yes, you did.

Marla walks into the tavern, makes a beeline for Jack.

JACK

WHAT THE HELL ARE YOU DOING HERE?!

120.

MARLA

You told me to meet you here at ten till.

WHEN?!

JACK

MARLA

Back in my room. When you dropped into the chair.

SHIT!

JACK

Irvine and a couple of the bruised-faced guys grin at Marla and take a few steps towards her. Jack grabs her and drags her out the door.

EXT. LOU'S TAVERN

Jack ignores the waiting cabbie and heads for the main road. He's stomping along at a brisk pace. His face hardens into a mask of psychotic determination. He pulls Marla with him onto a run-down side street.

HE DARTS INTO A

INT. PAWN SHOP

He immediately points to something high on a shelf.

JACK

Let me see that trumpet.

The OWNER, a huge, gruff man, pushes a ladder to the spot starts to climb. Jack throws himself onto the countertop near the register, looks around, pulls up a HANDGUN.

Hey!

OWNER

Marla GASPS. Jack checks the clip -- it's fully-loaded. He sprints for the door, dragging Marla.

EXT. STREET - CONTINUOUS

Jack steps out into traffic. A LEXUS screeches to a halt. Jack goes to the DRIVER'S door and whips it open.

JACK

Police emergency.

Bullshit!

DRIVER

121.

Jack shoves the gun barrel into the Driver's temple. The Driver gets out of the car and FLEES. Jack points the gun at Marla and motions her to get into the car. Overwhelmed by all this, she complies. Jack leaps behind the wheel and stomps on the gas.

EXT. GREYHOUND BUS STATION - LATER

Jack drags Marla into the passenger loading area. A Greyhound bus is taking on passengers. Jack sees the DESTINATION -- PHOENIX -- and he impulsively averts his eyes, but too late.

JACK

SHIT! I can't know where it's

going! Come on, let's find another

one.

Jack drags her to another loading bus. He keeps his eyes averted from the DESTINATION sign.

JACK (CONT'D)

Get on the bus.

MARLA (READING THE DESTINATION)

But I don't want to go to --

JACK

SHUT UP! Don't tell me where it's

going!

MARLA

But, the people there talk funny

and their teeth are rotten.

JACK

Shit! Now, I know it's the rural

South!

Jack jams the gun barrel into Marla's ribs.

JACK (CONT'D)

Get on that fucking bus right now!

Marla starts for the bus. Jack keeps himself from seeing the destination sign, but watches Marla get on board. Then, the doors close. Then, the bus pulls away. Then, the bus gets to the end of the road and turns a corner.

Jack turns and walks off the passenger platform and out into the

122.

EXT. STREET NIGHT

He sees a Space Monkey on the corner, watching him. He looks down and sees another Monkey in the opposite direction, also watching him.

JACK (V.O.)

They probably had a map of the city

with little push pins. I felt like

a migrating goose on "Wild Kingdom.

Well, fine. They could watch me do

*this*".

INT. POLICE STATION - NIGHT

Jack walks past desks of PLAINCLOTHES DETECTIVES until he sees a private office. He glances down at a business card, then keeps moving forward.

INT. OFFICE - CONTINUOUS

Jack steps inside the office to see Detective Stern at the desk.

JACK

I want you to arrest me. I'm the

leader of a terrorist organization

that's about to set off bombs all

over the city.

Detective Stern scowls at Jack.

INT. HALLWAY - MOMENTS LATER

Jack, handcuffed, is led by Detective Stern. Several other DETECTIVES follow. A somber mood prevails.

INT. INTERROGATION ROOM - CONTINUOUS

1. tern enters and leads Jack to a table. All the other Detectives file inside. The last one closes the door. Dim light from a single bulb overhead creates the tone of a torture chamber. Cigarette smoke becomes thick. Jack sighs with relief. It's finally over. The Detectives all stare harshly at Jack.
2. hen, they all BURST into HYSTERICAL LAUGHTER. They slap and punch Jack's shoulder.

DETECTIVE STERN

Very good, Mr. Durden.

Jack uses all his strength to stifle his utter shock. He forces a thin smile.

123.

DETECTIVE STERN (CONT'D)

Operation Domino has everyone a

little skittish right now. But

it's all going like clockwork.

Jack, ready to explode, keeps the smile plastered on his face and forces his hand -- like a palsy victim -- to form the gesture "thumbs up".

The Detectives give him the same gesture in reply.

EXT. BACK OF POLICE STATION - NIGHT

A door opens and Jack is playfully shoved outside. LAUGHTER of Detectives rings out. Jacks starts to walk away from the police station.

EXT. STREET - CONTINUOUS

Jack steps out into the street. In a state of shock, he lopes forward, dizzy.

JACK

... Operation Domino.. "fall like

dominoes".. SHIT! ONE, TWO, THREE!

YES!

Passersby look at him as if he were a homeless, insane guy.

JACK (CONT’D)

THE BANKS! What was the first

one?! Number one, number one..

*CITIBANK*!

INT. STOLEN LEXUS - MOMENTS LATER

Jack RACES along the streets, swerving and passing cars, HONKING.

After a beat a MOTORCYCLE COP appears behind Jack and turns on his SIREN and FLASHING LIGHT. Jack reflexively slows down. The motorcycle moves up beside Jack and the COP SMILES, waving Jack forward. The Cop provides an ESCORT. The Lexus turns a corner and heads for the

EXT. CITIBANK BUILDING - CONTINUOUS

Jack leaps out of the car. He sprints into the

INT. LOBBY - NIGHT

Two Space Monkeys take over the escort and lead Jack toward the elevators.

124.

JACK

1. 'll take the stairs.
2. ack darts to the side, throws open the stairwell door. INT. STAIRWELL

Jack dashes DOWN the steps.

INT. PARKING AREA

Jack races from the stairwell into the parking area, eyes combing the place. He darts from one SUPPORT POST to another, his eyes frantically searching.

He moves around a support post and sees -- Tyler, sitting on the ground, his back against the post.

TYLER

Looking for something?

JACK

Where are the charges at?!

TYLER

Don't end a sentence with a

preposition.

JACK

WHERE ARE THE CHARGES AT,

*FUCKHEAD*?!!!

TYLER

Listen to "Elephant Balls".. shit,

slinging a gun. *Where did I go

right*?

JACK

1. 'll find them.
2. ack moves away, continues looking around support posts.

TYLER

There's eight floors of parking.

JACK

I don't give a shit.

TYLER

You do -- because you don't have

enough time.

Tyler grins, points to his watch.

125.

TYLER (CONT'D)

... Ten minutes.

Jack stalks back toward Tyler, gun raised.

JACK

TELL ME WHERE THE CHARGES ARE!

TYLER

They're all up and down the

building. They're not just here.

TYLER (CONT'D)

If you tried to stupidly pull a

fuse on a charge, you'd just cause

it to blow up. The charges are set

to go in a specific order -- so

that the building will implode and

collapse. If you *did* defuse one

of the charges, you'd fuck up the

sequence, and the building might

fall the wrong way. Why don't you

just find a television and watch

the party?

JACK

I'm awake. I have control of the

body. You can't give orders.

TYLER

I don't have any orders left to

give. It's all set.

Jack boils over, then cracks. He drops the gun, falls to his knees and clutches at Tyler. He touches Tyler's face.

JACK

Tyler. You're real, aren't you?

This is all a big joke, isn't it?

You *are* real, you son of a bitch!

Tears well up in Jack's eyes. He hugs Tyler. Tyler hugs him back.

TYLER

We're both real.

Jack squeezes harder, then lifts his head -- he's hugging ANOTHER JACK.

The real Jack gasps, flinches backwards, landing on the gun. He turns, grabs the gun, and turns back around. Fifty feet away, Tyler, standing, leans against a pillar. He winks.

126.

Jack raises the gun, turns it around and aims it at his own head.

JACK

There's only one way to stop all

this.

Jack shoves the barrel into his mouth.

TYLER

You better not. If our body is

found dead, the Space Monkeys have

orders to kill Marla.

JACK

Marla is gone -- and you don't know

where.

Tyler's hand suddenly DARTS INTO FRAME, CLOSE-UP and SNATCHES the gun.

NEW ANGLE

Tyler, laughing, holding the gun, dashes for the elevator. Jack sprints after him.

INT. ELEVATOR

Jack manages to leap inside just as the door closes. He lunges at Tyler and fights for the gun. Tyler, laughing, manages to retain it.

The elevator climbs rapidly -- blinking numbers indicate floors whizzing past.

INT. TOP FLOOR LOBBY

The elevator doors open and the struggling pair whirl out and toward the GLASS WALLS. Tyler SHOVES Jack's HEAD against the window, turns it so Jack is looking down.

ANGLE ON STREET

A GREYHOUND BUS sits idling right by the front lobby doors, having been allowed through the cordon.

INT. TOP FLOOR LOBBY - RESUMING

As Tyler and Jack continue to stare downward.

JACK

That's.. not the bus.

127.

TYLER

You know it is.

Tyler swings Jack away from the window and shoves him backwards.

TYLER (CONT'D)

Now, can you grasp that there's

nothing you can do?

Jack raises the gun, aiming at Tyler. Tyler laughs, but flinches --

just as Jack FIRES. The bullet chews out a CHUNK of the wall.

JACK

I'm not going to kill myself. I'm

going to kill *you*.

Tyler laughs, but he starts rapidly moving down the hallway.

TYLER

You can't kill me! How can you

kill me?!

Jack FIRES again, missing Tyler. Tyler breaks into a sprint. Jack does the same.

INT. HALLWAY

Jack turns a corner, sees Tyler at the end of the section of hallway, heading for an intersection. Jack aims the gun at Tyler. RAPID CUT

TO:

SECURITY CAMERA POV - HALLWAY

Jack aims the gun at himself. RAPID CUT TO:

INT. HALLWAY

Jack FIRES. As Tyler flinches down -- RAPID CUT TO: SECURITY CAMERA POV - HALLWAY

*Jack* flinches down, having shot at himself. RAPID CUT TO: INT. HALLWAY

Jack resumes sprinting until he turns a corner to

128.

INT. NEW SECTION OF HALLWAY

Jack sees Tyler turn, freeze, then leap sideways toward a room. Jack

FIRES. The bullet GRAZES Tyler's leg. RAPID CUT TO: SECURITY CAMERA POV - HALLWAY

Jack, with the gun still aimed at his own leg, falls backwards,

bleeding from the graze wound his just gave himself. RAPID CUT TO:

INT. HALLWAY

Jack pulls himself to his feet, and, his face now looking completely insane, runs with his limp, holding the gun up, ready to fire. He turns a corner to --

INT. TOP FLOOR LOBBY

And suddenly, Tyler LEAPS onto Jack. RAPID CUT TO: SECURITY CAMERA POV - LOBBY

Jack crumples to the floor and wrestles with himself. He punches himself, he tries to trap pin his own arms, he kicks himself.

RAPID CUT TO:

INT. TOP FLOOR LOBBY

Tyler leaps to his feet and dashes away. Jack pulls himself up and follows into a --

INT. LARGE SOCIAL ROOM

With floor-to-ceiling windows showing a view of the city. There are a HUNDRED DUFFEL BAGS lining the floor, along the walls.

Tyler leaps onto Jack seizes the gun. Jack holds onto Tyler. Tyler shoves the gun barrel into Jack's mouth.

TYLER

Okay -- let's kill you -- let's

kill *both* of us. Be a martyr for

the cause.

Tyler pushes Jack against a glass wall. Jack, exhausted, is losing his spirit.

129.

JACK (V.O.)

I think this is about where we came

in.

TYLER

Two minutes.

Jack collapses to the floor. Tyler moves down with him, keeping the gun in Jack's mouth. He sits on Jack.

JACK

Either way -- the building blows us

up or you pull the trigger -- it'll

finally be over.

TYLER

This building isn't going to blow

up. It's the observation room.

Pay- per-view. So, what are you

going to do? You don't even have

the guts to make a decision.

Jack looks into his eyes for a moment, then reaches up and PULLS THE TRIGGER. *GO TO SLOW MOTION* AS -- KABLAM! his cheeks INFLATE with gas from the gun. His eyes bulge, BLOOD flies out backwards from his head.

SMOKE wafts out of his mouth.

RESUME NORMAL SPEED as Tyler gapes at Jack, then reaches behind his head and feels -- there's a HOLE BLOWN OUT THE BACK. Tyler's eyes glaze over and he falls backwards, plopping on the floor, DEAD, with a grin on his face.

A throng of Space Monkeys -- two of whom drag Marla -- RUSHES into the room. They see Jack, ALONE, holding a gun, bleeding profusely from the side of his face, where he's SHOT A HOLE through HIS CHEEK. He stares at the empty floor in front of him with his weird, little smile.

TALL SPACE MONKEY

ARE YOU ALL RIGHT, SIR?!!

The two Space Monkeys who hold Marla press forward through the crowd.

One of them puts a GUN to her head. He COCKS it.

TALL SPACE MONKEY (CONT’D)

ARE YOU ALL RIGHT, SIR?!!

Jack takes in the sight of Marla and the gun at her head. He cracks a Tyler-esque grin.

130.

JACK

Everything's fine. Give me the

girl.

The Monkeys release Marla. She moves next to Jack, now becoming more shocked by his bloody state. Jack grabs her arm. She digs through her purse and pulls out a wad of tissue paper. She puts them into his mouth to plug the hole.

MARLA

What the fuck is going on?!

Jack cracks his weird, little smile; his eyes are wide and half-insane-looking. He winks at Marla and squeezes her hand.

JACK

Tyler's dead.

The Space Monkeys all grab their duffel bags and file out of the room, saluting Jack as they go.

Now, Jack and Marla are completely alone. He struggles to get to his feet. She helps him. They look out the window.

MASSIVE EXPLOSION -- a building a quarter of a mile away. It's destruction is completely visible from here. The glass walls RATTLE LOUDLY from the shock wave. They both stare out the window.

JACK (CONT’D)

Listen, you met me at a really

weird time in my life..

Marla looks at Jack, then looks back out the window. He reaches for her hand. She takes his hand.

They are SILHOUETTED against BRIGHT FLASHES as ANOTHER BUILDING EXPLODES and COLLAPSES. ANOTHER BUILDING EXPLODES. And ANOTHER BUILDING. And ANOTHER BUILDING.

The FILM SLOWS DOWN, then ADVANCES ONE FRAME at a TIME -- SHOWING the SPROCKET HOLES on the SIDES. It's CAUGHT in the mechanism of the projector's GATE. EACH FRAME is the EXPLODING BUILDINGS -- then, *ONE FRAME is a PENIS*. Then, EXPLODING BUILDINGS again. SPEED UP the frames, LOSE the sprocket holes, RESUME NORMAL SPEED.

FADE OUT

*THE END*
