# Supplementary material
Source: ML conference proceedings conference paper supplement (https://openreview.net/forum?id=Sxi6gBtJcI)
Supplement: supplementary_material [file Manual evaluation.xlsx]

## Sheet: ROLLING
测试小说	段落	1.哪个剧本片段让您更期待接下来的剧情？	2.哪个剧本片段更能吸引您的注意力，使您沉浸在故事中？	3.哪个剧本片段的情节衔接更加自然流畅？	4.哪个剧本片段在场景转换时更不显突兀？	5.哪个剧本片段更像是由人类编剧所创作？	6.哪个剧本片段的对话更自然，符合人类表达的习惯？	7.哪个剧本片段的语言表达更准确、措辞更得体？	8.哪个剧本片段的语法结构更为优雅？	9.哪个剧本片段人物的情感变化更顺畅，不显突兀？	10.哪个剧本片段的故事节奏转换更自然？	11.哪个剧本片段更像是AI生成的？	12.哪个剧本片段更符合影视剧本的标准格式？	13.哪个剧本片段的走向与故事梗概更相符？	理由
莫扎特传	1	A	A	B	A	A	A	A	A	A	A	B	A	A
莫扎特传	1	A	B	A	B	A	A	A	A	B	B	B	A	A
莫扎特传	1	A	A	B	B	D	A	A	A	A	B	B	C	A
莫扎特传	1	A	B	A	B	B	A	B	A	B	A	A	A	A
莫扎特传	1	A	A	A	A	A	A	A	A	A	A	B	A	C
莫扎特传	1	A	A	A	A	A	A	A	A	A	A	A	B	C
莫扎特传	1	C	C	B	B	B	C	C	B	B	B	A	B	C
莫扎特传	2	B	B	B	B	B	A	B	B	B	B	A	B	B
莫扎特传	2	B	B	B	B	B	B	B	B	B	B	A	B	B
莫扎特传	2	B	B	A	A	B	C	B	B	C	A	A	B	A
莫扎特传	2	B	B	B	A	B	B	B	B	B	B	A	B	B
莫扎特传	2	B	B	A	C	C	C	B	B	B	B	A	B	C
莫扎特传	2	B	B	B	B	B	B	B	B	B	B	A	C	A
莫扎特传	2	A	A	A	A	A	C	A	A	A	A	B	A	C
莫扎特传	3	A	A	B	A	A	A	A	A	A	A	B	A	A
莫扎特传	3	A	A	A	A	A	A	A	A	A	A	B	A	C
莫扎特传	3	A	A	A	A	B	B	A	A	A	A	B	A	A
莫扎特传	3	B	B	B	B	B	B	B	B	B	B	A	B	B
莫扎特传	3	A	C	A	A	C	A	A	A	A	A	D	A	C
东方快车谋杀案	1	A	A	A	A	A	C	A	A	A	B	B	A	A
东方快车谋杀案	1	B	B	B	C	B	B	A	A	B	B	A	C	B
东方快车谋杀案	1	B	B	B	B	B	B	B	B	B	A	A	B	B
东方快车谋杀案	1	B	B	B	B	B	B	B	B	B	B	A	C	B
东方快车谋杀案	1	B	B	B	B	C	B	B	A	B	B	D	C	C
东方快车谋杀案	2	B	B	B	A	B	B	B	B	C	B	A	B	B
东方快车谋杀案	2	A	B	B	B	B	B	B	B	B	B	A	A	B
东方快车谋杀案	2	A	B	B	B	B	B	B	B	B	B	A	B	A
东方快车谋杀案	2	B	B	B	B	B	B	B	B	B	B	A	C	B
东方快车谋杀案	2	B	B	B	B	B	B	B	B	B	B	A	B	C
东方快车谋杀案	3	A	B	A	C	A	A	A	A	A	A	B	A	A
东方快车谋杀案	3	B	B	A	A	B	B	A	A	B	B	A	A	A
东方快车谋杀案	3	A	A	A	A	A	B	A	A	A	A	B	A	A
东方快车谋杀案	3	B	B	B	B	B	B	B	B	B	B	A	C	D
东方快车谋杀案	3	B	B	B	B	B	B	B	A	B	B	D	B	B
时间机器	1	A	A	A	A	A	C	A	A	B	A	B	C	A
时间机器	1	A	A	A	A	A	B	A	A	A	A	B	A	C
时间机器	1	A	A	A	A	A	B	B	A	A	A	B	A	B
时间机器	1	A	A	A	A	A	B	A	A	A	B	B	C	B
时间机器	1	C	C	A	C	A	A	A	A	C	A	B	C	C
时间机器	2	C	A	A	B	A	A	A	A	A	C	B	A	A
时间机器	2	A	B	A	A	A	A	A	A	A	A	B	A	A
时间机器	2	A	A	A	A	A	A	A	A	B	A	B	A	A
时间机器	2	A	A	A	A	A	A	A	A	A	A	B	A	A
时间机器	2	B	B	C	C	C	B	B	A	C	B	D	C	C
时间机器	3	C	C	B	A	C	B	B	B	A	B	D	B	B
时间机器	3	A	A	B	B	B	B	C	B	B	B	A	C	B
时间机器	3	A	B	A	A	B	B	B	B	B	B	A	B	B
时间机器	3	B	B	B	B	B	B	B	B	B	B	A	B	B
时间机器	3	C	C	B	C	C	B	B	B	C	B	D	C	C
夜色人生	1	B	B	B	B	B	C	B	B	A	B	A	B	B
夜色人生	1	B	B	B	B	B	B	B	B	B	B	A	B	B
夜色人生	1	A	B	B	B	B	B	A	B	B	B	B	B	B
夜色人生	1	A	A	A	A	A	A	A	B	A	A	B	C	C
夜色人生	1	B	B	B	B	B	C	C	B	B	B	A	C	C
夜色人生	3	A	A	A	C	A	A	A	A	B	A	B	A	A
夜色人生	3	B	B	B	B	B	B	A	A	B	B	A	C	B
夜色人生	3	A	B	B	A	A	B	B	A	A	B	A	A	B
夜色人生	3	A	A	C	C	A	A	A	A	A	A	B	A	B
夜色人生	3	C	A	A	A	C	B	A	A	C	C	B	A	C
搏击俱乐部	1	B	B	B	B	B	B	B	B	B	B	A	B	B
搏击俱乐部	1	B	B	B	B	A	B	B	B	B	B	A	C	B
搏击俱乐部	1	B	B	B	B	B	B	B	B	B	B	A	B	B
搏击俱乐部	1	A	A	A	A	A	A	A	A	A	A	B	A	A
搏击俱乐部	2	A	A	B	B	A	A	A	A	A	A	B	A	A
搏击俱乐部	2	B	B	B	B	B	B	B	B	B	B	A	C	B
搏击俱乐部	2	B	A	A	A	A	B	A	A	A	A	B	A	A
搏击俱乐部	2	A	A	A	A	A	A	A	A	A	A	B	A	A
搏击俱乐部	3	B	B	B	A	B	B	B	B	B	B	A	B	B
搏击俱乐部	3	B	B	B	B	B	B	B	B	B	B	A	B	B
搏击俱乐部	3	B	B	B	A	B	B	B	B	B	B	A	B	B
搏击俱乐部	3	B	B	B	B	B	B	B	B	B	B	A	B	B
搏击俱乐部	3	B	B	B	B	B	C	B	B	B	B	A	B	C
夜色人生	2	B	B	B	B	B	B	B	B	B	B	A	B	B
夜色人生	2	B	B	A	B	B	B	A	B	B	B	A	B	B
夜色人生	2	A	A	A	A	A	A	A	A	A	A	B	A	A
夜色人生	2	B	B	B	B	B	B	B	B	B	B	A	B	C

## Sheet: Dramatron
测试小说	段落	1.哪个剧本片段让您更期待接下来的剧情？	2.哪个剧本片段更能吸引您的注意力，使您沉浸在故事中？	3.哪个剧本片段的情节衔接更加自然流畅？	4.哪个剧本片段在场景转换时更不显突兀？	5.哪个剧本片段更像是由人类编剧所创作？	6.哪个剧本片段的对话更自然，符合人类表达的习惯？	7.哪个剧本片段的语言表达更准确、措辞更得体？	8.哪个剧本片段的语法结构更为优雅？	9.哪个剧本片段人物的情感变化更顺畅，不显突兀？	10.哪个剧本片段的故事节奏转换更自然？	11.哪个剧本片段更像是AI生成的？	12.哪个剧本片段更符合影视剧本的标准格式？	13.哪个剧本片段的走向与故事梗概更相符？	14.建议与看法
搏击俱乐部	1	A	A	A	A	A	A	A	A	B	A	B	A	A
搏击俱乐部	3	A	A	A	A	A	A	A	A	B	A	B	A	A
搏击俱乐部	2	A	A	A	A	A	A	A	A	B	A	B	A	A
搏击俱乐部	3	A	A	A	A	A	A	A	A	A	A	B	A	B
搏击俱乐部	2	A	A	A	A	A	A	A	A	A	A	B	A	C
搏击俱乐部	1	A	A	A	B	A	B	B	B	A	A	B	A	B
搏击俱乐部	3	A	B	B	B	B	B	B	B	B	B	A	C	B
搏击俱乐部	2	B	A	B	B	B	B	B	B	B	B	A	C	B
搏击俱乐部	1	A	B	B	A	B	B	B	B	B	B	A	A	B
东方快车谋杀案	3	A	A	A	A	A	A	A	A	A	A	B	A	A
东方快车谋杀案	2	A	A	A	A	A	A	A	A	A	A	B	A	C
东方快车谋杀案	1	A	A	A	A	A	A	B	B	A	A	B	A	C
东方快车谋杀案	3	B	B	B	B	B	A	B	B	A	B	A	B	A
东方快车谋杀案	2	A	A	B	B	A	A	A	B	A	B	B	B	A
东方快车谋杀案	1	B	B	A	B	B	A	B	B	A	B	A	B	A
东方快车谋杀案	3	C	A	B	B	B	B	B	B	C	A	A	C	D
东方快车谋杀案	2	C	C	B	B	B	B	B	B	C	B	A	C	B
东方快车谋杀案	1	C	C	B	B	B	B	B	B	B	B	A	C	B
莫扎特传	3	A	A	A	A	A	A	A	B	A	B	B	A	A
莫扎特传	2	A	A	B	B	B	B	B	B	A	B	A	B	B
莫扎特传	1	A	A	A	A	A	A	A	A	A	A	B	A	A
莫扎特传	3	A	A	B	B	B	B	B	B	B	B	A	C	B
莫扎特传	3	A	A	A	A	A	A	A	A	A	A	B	A	A
莫扎特传	2	A	B	B	B	B	B	B	B	B	B	A	C	B
莫扎特传	2	A	A	A	A	A	A	A	A	A	A	B	A	A
莫扎特传	1	A	A	A	A	A	A	A	B	A	A	B	A	C
莫扎特传	1	B	B	B	B	B	B	B	B	B	B	A	B	C
时间机器	3	C	C	A	A	C	B	B	B	A	A	A	C	A
时间机器	2	C	C	B	B	B	B	B	B	B	B	A	C	B
时间机器	1	B	B	B	B	B	B	B	B	B	B	A	C	B
时间机器	3	A	A	B	A	A	B	A	A	B	A	B	A	B
时间机器	2	B	A	A	B	B	A	B	B	A	B	A	B	A
时间机器	3	A	A	A	A	A	A	A	C	A	A	B	A	C
时间机器	2	C	A	A	B	C	A	A	B	C	C	D	A	C
时间机器	1	A	C	A	A	A	C	A	B	A	A	B	A	C
时间机器	1	B	B	A	B	B	A	B	B	A	B	A	B	A
夜色人生	3	B	A	B	B	A	A	B	A	B	A	B	B	B
夜色人生	2	A	B	A	A	A	B	B	A	B	A	B	B	B
夜色人生	1	B	B	B	A	B	B	B	B	B	B	B	B	B
夜色人生	3	A	A	A	A	A	A	A	A	A	A	B	A	C
夜色人生	2	A	A	A	A	A	A	A	A	A	A	B	A	C
夜色人生	1	A	A	A	A	A	B	B	A	A	A	B	A	C
夜色人生	1	B	B	B	B	B	B	B	B	A	B	A	B	B
夜色人生	3	C	C	B	B	B	B	B	B	B	B	A	C	B
夜色人生	2	B	B	B	B	B	B	B	B	B	B	A	C	B
夜色人生	1	B	B	B	B	B	B	B	B	B	B	A	A	B

## Sheet: Wawa
测试小说	段落	1.哪个剧本片段让您更期待接下来的剧情？	2.哪个剧本片段更能吸引您的注意力，使您沉浸在故事中？	3.哪个剧本片段的情节衔接更加自然流畅？	4.哪个剧本片段在场景转换时更不显突兀？	5.哪个剧本片段更像是由人类编剧所创作？	6.哪个剧本片段的对话更自然，符合人类表达的习惯？	7.哪个剧本片段的语言表达更准确、措辞更得体？	8.哪个剧本片段的语法结构更为优雅？	9.哪个剧本片段人物的情感变化更顺畅，不显突兀？	10.哪个剧本片段的故事节奏转换更自然？	11.哪个剧本片段更像是AI生成的？	12.哪个剧本片段更符合影视剧本的标准格式？	13.哪个剧本片段的走向与故事梗概更相符？	14.建议与看法
搏击俱乐部	1	B	B	B	B	D	B	B	B	B	B	A	B	A
搏击俱乐部	2	A	C	C	A	B	B	B	B	B	B	A	B	B
搏击俱乐部	2	B	B	A	A	D	B	B	B	B	B	C	B	B
搏击俱乐部	3	A	A	A	A	A	A	A	A	A	A	B	A	A
搏击俱乐部	3	B	B	B	B	B	B	B	B	B	B	A	B	D
搏击俱乐部	1	B	B	B	B	B	B	B	B	B	B	A	D	B
搏击俱乐部	1	A	A	A	A	A	A	A	A	A	A	B	A	C
搏击俱乐部	2	A	A	A	A	A	A	A	A	A	A	B	A	A
搏击俱乐部	3	A	A	A	A	A	A	A	A	A	A	B	A	A
东方快车谋杀案	1	B	B	B	B	B	B	B	B	B	B	A	C	D
东方快车谋杀案	3	A	A	A	A	A	A	A	A	A	A	B	A	D
东方快车谋杀案	2	A	A	A	C	A	A	A	A	A	A	D	C	C
东方快车谋杀案	2	B	B	B	B	B	B	B	B	B	B	A	B	B
东方快车谋杀案	3	A	A	A	A	A	A	A	A	A	A	B	A	A
东方快车谋杀案	1	A	A	A	A	A	A	A	A	A	A	D	A	C
东方快车谋杀案	2	C	C	A	A	C	A	A	A	A	A	D	A	C
东方快车谋杀案	3	A	A	A	A	A	A	A	A	A	A	B	A	A
莫扎特传	1	B	B	B	B	B	B	B	B	B	B	A	B	B
莫扎特传	2	B	B	B	B	B	B	B	B	B	B	A	B	D
莫扎特传	1	C	C	C	C	C	C	C	C	C	C	D	B	C
莫扎特传	3	B	B	B	C	B	B	B	B	B	B	A	B	D
莫扎特传	2	A	A	A	A	A	A	A	A	A	A	B	A	A
莫扎特传	3	A	A	A	A	A	A	A	A	A	A	B	A	A
莫扎特传	1	A	A	A	A	A	C	A	A	A	A	B	A	C
莫扎特传	2	A	A	A	A	A	C	A	A	A	A	D	A	A
莫扎特传	3	A	A	C	A	A	A	A	A	A	A	B	A	B
时间机器	1	A	A	A	A	A	A	A	A	A	C	B	A	C
时间机器	2	A	A	A	A	A	A	A	A	A	A	B	B	A
时间机器	2	A	A	A	A	A	A	A	A	A	A	B	A	D
时间机器	3	A	A	A	A	A	A	A	A	A	A	B	A	A
时间机器	1	B	B	B	B	B	B	B	B	B	B	A	B	B
时间机器	2	B	B	B	B	B	B	B	B	B	B	A	B	D
时间机器	3	B	B	A	B	C	C	C	C	C	A	A	B	C
夜色人生	1	B	B	B	B	B	B	B	B	B	B	D	B	A
夜色人生	1	A	A	A	A	A	A	A	A	A	A	B	C	D
夜色人生	3	B	B	B	B	B	B	B	B	B	B	A	C	D
夜色人生	2	B	B	B	B	B	B	B	B	B	B	A	B	D
夜色人生	1	A	A	A	A	A	C	A	A	C	A	D	A	B
夜色人生	2	A	A	A	A	A	C	C	A	A	A	B	A	B
夜色人生	3	A	A	A	A	A	C	C	A	A	A	B	A	B
