# Supplementary material
Source: ML conference proceedings conference paper supplement (https://openreview.net/forum?id=Sxi6gBtJcI)
Supplement: supplementary_material [file One-Flew-Over-the-Cuckoo_s-Nest-novel.docx]

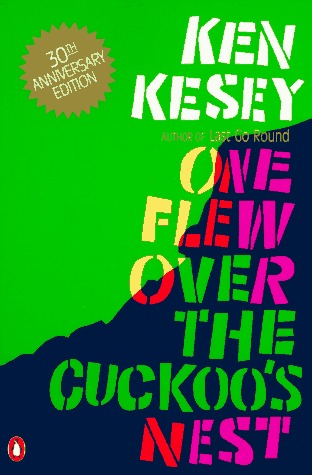


Ken Kesey one flew over the cuckoo’s nest

“YOU FEEL THIS BOOK

ALONG YOUR SPINE. ...”

— Kansas City Star

Tired of weeding peas at a penal farm, the tough, freewheeling McMurphy feigns insanity for a

chance at the softer life of a mental institution. But he gets more than he’s bargained for, much

more. He is committed to the care of Big Nurse—a full-breasted, stiff-gaited tyrant who rules over

her charges with chilling authority.

Her ward is a citadel of discipline. Strong-arm orderlies stand ready to quell even the feeblest insurrection. Her

patients long ago gave up the struggle to assert themselves. Cowed, docile, they have surrendered completely to her

unbridled authority.

Now, into their ranks charges McMurphy. The gambling Irishman sees at once what Big Nurse’s

game is. Appalled by the timidity of his fellow patients, he begins his one man campaign to render

her powerless. First in fun, and then in dire earnestness, he sets out to create havoc on her well-run

ward ... to make the gray halls ring with laughter, and anger, and life.

1

Ken Kesey one flew over the cuckoo’s nest

one

flew

over

the

cuckoo’s

nest

by KEN KESEY

2

Ken Kesey one flew over the cuckoo’s nest

To Vik Lovell

who told me dragons did not exist,

then led me to their lairs

3

Ken Kesey one flew over the cuckoo’s nest

COPYRIGHT © 1962 BY KEN KESEY

All rights reserved.

No part of this book may be reproduced without permission.

For information address The Viking Press, Inc.,

625 Madison Avenue, New York, New York 10022.

This is an authorized reprint of a hardcover edition

published by The Viking Press, Inc.

SIGNET TRADEMARK RRG. D.9. PAT. OFF.

# AND FOREIGN COUNTRIES

REGISTERED TRADEMARK—MARCA REGISTRADA

HECHO EN CHICAGO, U.S.A.

SIGNET BOOKS are published by

The New American Library, Inc.,

301 Avenue of the Americas, New York, New York 10019

# PRINTED IN THE UNITED STATES OF AMERICA

4

Ken Kesey one flew over the cuckoo’s nest

... one flew east, one flew west,

One flew over the cuckoo’s nest.

— Children’s folk rhyme

5

Ken Kesey one flew over the cuckoo’s nest

part 1

6

Ken Kesey one flew over the cuckoo’s nest

1

They’re out there.

Black boys in white suits up before me to commit sex acts in the hall and get it mopped up

before I can catch them.

They’re mopping when I come out the dorm, all three of them sulky and hating everything, the

time of day, the place they’re at here, the people they got to work around. When they hate like this,

better if they don’t see me. I creep along the wall quiet as dust in my canvas shoes, but they got

special sensitive equipment detects my fear and they all look up, all three at once, eyes glittering out

of the black faces like the hard glitter of radio tubes out of the back of an old radio.

“Here’s the Chief. The soo-pah Chief, fellas. Ol’ Chief Broom. Here you go, Chief Broom. ...”

Stick a mop in my hand and motion to the spot they aim for me to clean today, and I go. One

swats the backs of my legs with a broom handle to hurry me past.

“Haw, you look at ‘im shag it? Big enough to eat apples off my head an’ he mine me like a baby.”

[10] They laugh and then I hear them mumbling behind me, heads close together. Hum of black

machinery, humming hate and death and other hospital secrets. They don’t bother not talking out

loud about their hate secrets when I’m nearby because they think I’m deaf and dumb. Everybody

thinks so. I’m cagey enough to fool them that much. If my being half Indian ever helped me in any

way in this dirty life, it helped me being cagey, helped me all these years.

I’m mopping near the ward door when a key hits it from the other side and I know it’s the Big

Nurse by the way the lockworks cleave to the key, soft and swift and familiar she been around locks

so long. She slides through the door with a gust of cold and locks the door behind her and I see her

fingers trail across the polished steel—tip of each finger the same color as her lips. Funny orange.

Like the tip of a soldering iron. Color so hot or so cold if she touches you with it you can’t tell

which.

She’s carrying her woven wicker bag like the ones the Umpqua tribe sells out along the hot

August highway, a bag shape of a tool box with a hemp handle. She’s had it all the years I been here.

It’s a loose weave and I can see inside it; there’s no compact or lipstick or woman stuff, she’s got

that bag full of thousand parts she aims to use in her duties today—wheels and gears, cogs polished

to a hard glitter, tiny pills that gleam like porcelain, needles, forceps, watchmakers’ pliers, rolls of

copper wire …

She dips a nod at me as she goes past. I let the mop push me back to the wall and smile and try

to foul her equipment’ up as much as possible by not letting her see my eyes—they can’t tell so

much about you if you got your eyes closed.

In my dark I hear her rubber heels hit the tile and the stuff in her wicker bag clash with the jar of

her walking as she passes me in the hall. She walks stiff. When I open my eyes she’s down the hall

about to turn into the glass Nurses’ Station where she’ll spend the day sitting at her desk and looking

out her window and making notes on what goes on out in front of her in the day room during the

next eight hours. Her face looks pleased and peaceful with the thought.

Then … she sights those black boys. They’re still down there together, mumbling to one another.

They didn’t hear her come on the ward. They sense she’s glaring down at them now, but it’s too late.

They should of knew better’n to group up and mumble together when she was due on the ward.

Their faces bob apart, confused. She goes into a crouch and advances on where they’re trapped in a

huddle at the end of the corridor. [11] She knows what they been saying, and I can see she’s furious

clean out of control. She’s going to tear the black bastards limb from limb, she’s so furious. She’s

swelling up, swells till her back’s splitting out the white uniform and she’s let her arms section out

long enough to wrap around the three of them five, six times. She looks around her with a swivel of

7

Ken Kesey one flew over the cuckoo’s nest

her huge head. Nobody up to see, just old Broom Bromden the half-breed Indian back there hiding

behind his mop and can’t talk to call for help. So she really lets herself go and her painted smile

twists, stretches to an open snarl, and she blows up bigger and bigger, big as a tractor, so big I can

smell the machinery inside the way you smell a motor pulling too big a load. I hold my breath and

figure, My God this time they’re gonna do it! This time they let the hate build up too high and

overloaded and they’re gonna tear one another to pieces before they realize what they’re doing!

But just as she starts crooking those sectioned arms around the black boys and they go to ripping

at her underside with the mop handles, all the patients start coming out of the dorms to check on

what’s the hullabaloo, and she has to change back before she’s caught in the shape of her hideous

real self. By the time the patients get their eyes rubbed to where they can halfway see what the

racket’s about, all they see is the head nurse, smiling and calm and cold as usual, telling the black

boys they’d best not stand in a group gossiping when it is Monday morning and there is such a lot to

get done on the first morning of the week. ...

“... mean old Monday morning, you know, boys ...”

“Yeah, Miz Ratched ...

“... and we have quite a number of appointments this morning, so perhaps, if your standing here

in a group talking isn’t too urgent ...”

“Yeah, Miz Ratched ...”

She stops and nods at some of the patients come to stand around and stare out of eyes all red

and puffy with sleep. She nods once to each. Precise, automatic gesture. Her face is smooth,

calculated, and precision-made, like an expensive baby doll, skin like flesh-colored enamel, blend of

white and cream and baby-blue eyes, small nose, pink little nostrils—everything working together

except the color on her lips and fingernails, and the size of her bosom. A mistake was made

somehow in manufacturing, putting those big, womanly breasts on what would of otherwise been a

perfect work, and you can see how bitter she is about it.

The men are still standing and waiting to see what she was [12] onto the black boys about, so she

remembers seeing me and says, “And since it is Monday, boys, why don’t we get a good head start

on the week by shaving poor Mr. Bromden first this morning, before the after-breakfast rush on the

shaving room, and see if we can’t avoid some of the—ah—disturbance he tends to cause, don’t you

think?”

Before anybody can turn to look for me I duck back in the mop closet, jerk the door shut dark

after me, hold my breath. Shaving before you get breakfast is the worst time. When you got

something under your belt you’re stronger and more wide awake, and the bastards who work for the

Combine aren’t so apt to slip one of their machines in on you in place of an electric shaver. But

when you shave before breakfast like she has me do some mornings—six-thirty in the morning in a

room all white walls and white basins, and long-tube-lights in the ceiling making sure there aren’t

any shadows, and faces all round you trapped screaming behind the mirrors—then what chance you

got against one of their machines?

I hide in the mop closet and listen, my heart beating in the dark, and I try to keep from getting

scared, try to get my thoughts off someplace else—try to think back and remember things about the

village and the big Columbia River, think about ah one time Papa and me were hunting birds in a

stand of cedar trees near The Dalles. ... But like always when I try to place my thoughts in the past

and hide there, the fear close at hand seeps in through the memory. I can feel that least black boy

out there coming up the hall, smelling out for my fear. He opens out his nostrils like black funnels,

his outsized head bobbing this way and that as he sniffs, and he sucks in fear from all over the ward.

He’s smelling me now, I can hear him snort. He don’t know where I’m hid, but he’s smelling and

he’s hunting around. I try to keep still. …

8

Ken Kesey one flew over the cuckoo’s nest

(Papa tells me to keep still, tells me that the dog senses a bird somewheres right close. We

borrowed a pointer dog from a man in The Dalles. All the village dogs are no-‘count mongrels, Papa

says, fish-gut eaters and no class a-tall; this here dog, he got insteek! I don’t say anything, but I already

see the bird up in a scrub cedar, hunched in a gray knot of feathers. Dog running in circles

underneath, too much smell around for him to point for sure. The bird safe as long as he keeps still.

He’s holding out pretty good, but the dog keeps sniffing and circling, louder and closer. Then the

bird breaks, feathers springing, jumps out of the cedar into the birdshot from Papa’s gun.)

The least black boy and one of the bigger ones catch me [13] before I get ten steps out of the

mop closet, and drag me back to the shaving room. I don’t fight or make any noise. If you yell it’s

just tougher on you. I hold back the yelling. I hold back till they get to my temples. I’m not sure it’s

one of those substitute machines and not a shaver till it gets to my temples; then I can’t hold back.

It’s not a will-power thing any more when they get to my temples. It’s a … button, pushed, says Air

Raid Air Raid, turns me on so loud it’s like no sound, everybody yelling at me, hands over their ears

from behind a glass wall, faces working around in talk circles but no sound from the mouths. My

sound soaks up all other sound. They start the fog machine again and it’s snowing down cold and

white all over me like skim milk, so thick I might even be able to hide in it if they didn’t have a hold

on me. I can’t see six inches in front of me through the fog and the only thing I can hear over the

wail I’m making is the Big Nurse whoop and charge up the hall while she crashes patients outta her

way with that wicker bag. I hear her coming but I still can’t hush my hollering. I holler till she gets

there. They hold me down while she jams wicker bag and all into my mouth and shoves it down

with a mop handle.

(A bluetick hound bays out there in the fog, running scared and lost because he can’t see. No

tracks on the ground but the ones he’s making, and he sniffs in every direction with his cold redrubber nose and picks up no scent but his own fear, fear burning down into him like steam.) It’s

gonna burn me just that way, finally telling about all this, about the hospital, and her, and the guys—

and about McMurphy. I been silent so long now it’s gonna roar out of me like floodwaters and you

think the guy telling this is ranting and raving my God; you think this is too horrible to have really

happened, this is too awful to be the truth! But, please. It’s still hard for me to have a clear mind

thinking on it. But it’s the truth even if it didn’t happen.

9

Ken Kesey one flew over the cuckoo’s nest

2

When the fog clears to where I can see, I’m sitting in the day room. They didn’t take me to the

Shock Shop this time. I remember they took me out of the shaving room and locked me in

Seclusion. I don’t remember if I got breakfast or not. Probably not. I can call to mind some

mornings locked in Seclusion the black boys keep bringing seconds of everything—supposed to be

for me, but they eat it instead—till all three of them get breakfast while I lie there on that peestinking mattress, watching them wipe up egg with toast. I can smell the grease and hear them chew

the toast. Other mornings they bring me cold mush and force me to eat it without it even being

salted.

This morning I plain don’t remember. They got enough of those things they call pills down me

so I don’t know a thing till I hear the ward door open. That ward door opening means it’s at least

eight o’clock, means there’s been maybe an hour and a half I was out cold in that Seclusion Room

when the technicians could of come in and installed anything the Big Nurse ordered and I wouldn’t

have the slightest notion what.

I hear noise at the ward door, off up the hall out of my sight. That ward door starts opening at

eight and opens and closes a thousand times a day, kashash, click. Every morning we sit lined up on

each side of the day room, mixing jigsaw puzzles after breakfast, listen for a key to hit the lock, and

wait to see what’s coming in. There’s not a whole lot else to do. Sometimes, at the door, it’s a young

resident in early so he can watch what we’re like Before Medication. BM, they call it. Sometimes it’s a

wife visiting there on high heels with her purse held tight over her belly. Sometimes it’s a clutch of

grade-school teachers being led on a tour by that fool Public Relation man who’s always clapping his

wet hands together and saying how overjoyed he is that mental hospitals have eliminated all the oldfashioned cruelty. “What a cheery atmosphere, don’t you agree?” He’ll bustle around the

schoolteachers, who are bunched together for safety, clapping his hands together. “Oh, when I think

back on the old days, on the filth, the bad food, even, yes, brutality, oh, I realize, ladies, that we have

come a long way in our campaign!” Whoever comes in [15] the door is usually somebody

disappointing, but there’s always a chance otherwise, and when a key hits the lock all the heads come

up like there’s strings on them.

This morning the lockworks rattle strange; it’s not a regular visitor at the door. An Escort Man’s

voice calls down, edgy and impatient, “Admission, come sign for him,” and the black boys go.

Admission. Everybody stops playing cards and Monopoly, turns toward the day-room door.

Most days I’d be out sweeping the hall and see who they’re signing in, but this morning, like I

explain to you, the Big Nurse put a thousand pounds down me and I can’t budge out of the chair.

Most days I’m the first one to see the Admission, watch him creep in the door and slide along the

wall and stand scared till the black boys come sign for him and take him into the shower room,

where they strip him and leave him shivering with the door open while they all three run grinning up

and down the halls looking for the Vaseline. “We need that Vaseline,” they’ll tell the Big Nurse, “for

the thermometer.” She looks from one to the other: “I’m sure you do,” and hands them a jar holds at

least a gallon, “but mind you boys don’t group up in there.” Then I see two, maybe all three of them

in there, in that shower room with the Admission, running that thermometer around in the grease

till it’s coated the size of your finger, crooning, “Tha’s right, mothah, that’s right,” and then shut the

door and turn all the showers up to where you can’t hear anything but the vicious hiss of water on

the green tile. I’m out there most days, and I see it like that.

But this morning I have to sit in the chair and only listen to them bring him in. Still, even though

I can’t see him, I know he’s no ordinary Admission. I don’t hear him slide scared along the wall, and

10

Ken Kesey one flew over the cuckoo’s nest

when they tell him about the shower he don’t just submit with a weak little yes, he tells them right

back in a loud, brassy voice that he’s already plenty damn clean, thank you.

“They showered me this morning at the courthouse and last night at the jail. And I swear I believe

they’d of washed my ears for me on the taxi ride over if they coulda found the vacilities. Hoo boy,

seems like everytime they ship me someplace I gotta get scrubbed down before, after, and during the

operation. I’m gettin’ so the sound of water makes me start gathering up my belongings. And get

back away from me with that thermometer, Sam, and give me a minute to look my new home over;

I never been in a Institute of Psychology before.”

The patients look at one another’s puzzled faces, then back [16] to the door, where his voice is

still coming in. Talking louder’n you’d think he needed to if the black boys were anywhere near him.

He sounds like he’s way above them, talking down, like he’s sailing fifty yards overhead, hollering at

those below on the ground. He sounds big. I hear him coming down the hall, and he sounds big in

the way he walks, and he sure don’t slide; he’s got iron on his heels and he rings it on the floor like

horseshoes. He shows up in the door and stops and hitches his thumbs in his pockets, boots wide

apart, and stands there with the guys looking at him.

“Good mornin’, buddies.”

There’s a paper Halloween bat hanging on a string above his head; he reaches up and flicks it so

it spins around.

“Mighty nice fall day.”

He talks a little the way Papa used to, voice loud and full of hell, but he doesn’t look like Papa;

Papa was a full-blood Columbia Indian—a chief—and hard and shiny as a gunstock. This guy is

redheaded with long red sideburns and a tangle of curls out from under his cap, been needing cut a

long time, and he’s broad as Papa was tall, broad across the jaw and shoulders and chest, a broad

white devilish grin, and he’s hard in a different kind of way from Papa, kind of the way a baseball is

hard under the scuffed leather. A seam runs across his nose and one cheekbone where somebody

laid him a good one in a fight, and the stitches are still in the seam. He stands there waiting, and

when nobody makes a move to say anything to him he commences to laugh. Nobody can tell exactly

why he laughs; there’s nothing funny going on. But it’s not the way that Public Relation laughs, it’s

free and loud and it comes out of his wide grinning mouth and spreads in rings bigger and bigger till

it’s lapping against the walls all over the ward. Not like that fat Public Relation laugh. This sounds

real. I realize all of a sudden it’s the first laugh I’ve heard in years.

He stands looking at us, rocking back in his boots, and he laughs and laughs. He laces his fingers

over his belly without taking his thumbs out of his pockets. I see how big and beat up his hands are.

Everybody on the ward, patients, staff, and all, is stunned dumb by him and his laughing. There’s no

move to stop him, no move to say anything. He laughs till he’s finished for a time, and he walks on

into the day room. Even when he isn’t laughing, that laughing sound hovers around him, the way

the sound hovers around a big bell just quit ringing—it’s in his eyes, in the way he smiles and

swaggers, in the way he talks.

“My name is McMurphy, buddies, R. P. McMurphy, and [17] I’m a gambling fool.” He winks and

sings a little piece of a song: “ ‘... and whenever I meet with a deck a cards I lays … my money ...

down,’” and laughs again.

He walks to one of the card games, tips an Acute’s cards up with a thick, heavy finger, and

squints at the hand and shakes his head.

“Yessir, that’s what I came to this establishment for, to bring you birds fun an’ entertainment

around the gamin’ table. Nobody left in that Pendleton Work Farm to make my days interesting any

more, so I requested a transfer, ya see. Needed some new blood. Hooee, look at the way this bird

holds his cards, showin’ to everybody in a block; man! I’ll trim you babies like little lambs.”

11

Ken Kesey one flew over the cuckoo’s nest

Cheswick gathers his cards together. The redheaded man sticks his hand out for Cheswick to

shake.

“Hello, buddy; what’s that you’re playin’? Pinochle? Jesus, no wonder you don’t care nothin’

about showing your hand. Don’t you have a straight deck around here? Well say, here we go, I

brought along my own deck, just in case, has something in it other than face cards—and check the

pictures, huh? Every one different. Fifty-two positions.”

Cheswick is pop-eyed already, and what he sees on those cards don’t help his condition.

“Easy now, don’t smudge ‘em; we got lots of time, lots of games ahead of us. I like to use my

deck here because it takes at least a week for the other players to get to where they can even see the

suit. ...”

He’s got on work-farm pants and shirt, sunned out till they’re the color of watered milk. His face

and neck and arms are the color of oxblood leather from working long in the fields. He’s got a

primer-black motorcycle cap stuck in his hair and a leather jacket over one arm, and he’s got on

boots gray and dusty and heavy enough to kick a man half in two. He walks away from Cheswick

and takes off the cap and goes to beating a dust storm out of his thigh. One of the black boys circles

him with the thermometer, but he’s too quick for them; he slips in among the Acutes and starts

moving around shaking hands before the black boy can take good aim. The way he talks, his wink,

his loud talk, his swagger all remind me of a car salesman or a stock auctioneer—or one of those

pitchmen you see on a sideshow stage, out in front of his flapping banners, standing there in a

striped shirt with yellow buttons, drawing the faces off the sawdust like a magnet.

“What happened, you see, was I got in a couple of hassles at the work farm, to tell the pure truth,

and the court ruled [18] that I’m a psychopath. And do you think I’m gonna argue with the court?

Shoo, you can bet your bottom dollar I don’t. If it gets me outta those damned pea fields I’ll be

whatever their little heart desires, be it psychopath or mad dog or werewolf, because I don’t care if I

never see another weedin’ hoe to my dying day. Now they tell me a psychopath’s a guy fights too

much and fucks too much, but they ain’t wholly right, do you think? I mean, whoever heard tell of a

man gettin’ too much poozle? Hello, buddy, what do they call you? My name’s McMurphy and I’ll

bet you two dollars here and now that you can’t tell me how many spots are in that pinochle hand

you’re holding don’t look. Two dollars; what d’ya say? God damn, Sam! can’t you wait half a minute to

prod me with that damn thermometer of yours?”

12

Ken Kesey one flew over the cuckoo’s nest

3

The new man stands looking a minute, to get the set-up of the day room.

One side of the room younger patients, known as Acutes because the doctors figure them still

sick enough to be fixed, practice arm wrestling and card tricks where you add and subtract and

count down so many and it’s a certain card. Billy Bibbit tries to learn to roll a tailor-made cigarette,

and Martini walks around, discovering things under the tables and chairs. The Acutes move around a

lot. They tell jokes to each other and snicker in their fists (nobody ever dares let loose and laugh, the

whole staff’d be in with notebooks and a lot of questions) and they write letters with yellow, runty,

chewed pencils.

They spy on each other. Sometimes one man says something about himself that he didn’t aim to

let slip, and one of his buddies at the table where he said it yawns and gets up and sidles over to the

big log book by the Nurses’ Station and writes down the piece of information he heard—of

therapeutic interest to the whole ward, is what the Big Nurse says the book is for, but I know she’s

just waiting to get enough evidence to have some guy reconditioned at the Main Building,

overhauled in the head to straighten out the trouble.

The guy that wrote the piece of information in the log book, he gets a star by his name on the

roll and gets to sleep late the next day.

Across the room from the Acutes are the culls of the Combine’s product, the Chronics. Not in

the hospital, these, to get fixed, but just to keep them from walking around the streets giving the

product a bad name. Chronics are in for good, the staff concedes. Chronics are divided into Walkers

like me, can still get around if you keep them fed, and Wheelers and Vegetables. What the Chronics

are—or most of us—are machines with flaws inside that can’t be repaired, flaws born in, or flaws

beat in over so many years of the guy running head-on into solid things that by the time the hospital

found him he was bleeding rust in some vacant lot.

But there are some of us Chronics that the staff made a couple of mistakes on years back, some

of us who were Acutes when we came in, and got changed over. Ellis is a Chronic [20] came in an

Acute and got fouled up bad when they overloaded him in that filthy brain-murdering room that the

black boys call the “Shock Shop.” Now he’s nailed against the wall in the same condition they lifted

him off the table for the last time, in the same shape, arms out, palms cupped, with the same horror

on his face. He’s nailed like that on the wall, like a stuffed trophy. They pull the nails when it’s time

to eat or time to drive him in to bed when they want him to move so’s I can mop the puddle where

he stands. At the old place he stood so long in one spot the piss ate the floor and beams away under

him and he kept falling through to the ward below, giving them all kinds of census headaches down

there when roll check came around.

Ruckly is another Chronic came in a few years back as an Acute, but him they overloaded in a

different way: they made a mistake in one of their head installations. He was being a holy nuisance

all over the place, kicking the black boys and biting the student nurses on the legs, so they took him

away to be fixed. They strapped him to that table, and the last anybody saw of him for a while was

just before they shut the door on him; he winked, just before the door closed, and told the black

boys as they backed away from him, “You’ll pay for this, you damn tarbabies.”

And they brought him back to the ward two weeks later, bald and the front of his face an oily

purple bruise and two little button-sized plugs stitched one above each eye. You can see by his eyes

how they burned him out over there; his eyes are all smoked up and gray and deserted inside like

blown fuses. All day now he won’t do a thing but hold an old photograph up in front of that

burned-out face, turning it over and over in his cold fingers, and the picture wore gray as his eyes on

both sides with all his handling till you can’t tell any more what it used to be.

13

Ken Kesey one flew over the cuckoo’s nest

The staff, now, they consider Ruckly one of their failures, but I’m not sure but what he’s better

off than if the installation had been perfect. The installations they do nowadays are generally

successful. The technicians got more skill and experience. No more of the button holes in the

forehead, no cutting at all—they go in through the eye sockets. Sometimes a guy goes over for an

installation, leaves the ward mean and mad and snapping at the whole world and comes back a few

weeks later with black-and-blue eyes like he’d been in a fist-fight, and he’s the sweetest, nicest, bestbehaved thing you ever saw. He’ll maybe even go home in a month or two, a hat pulled low over the

face of a sleepwalker wandering round in a simple, happy [21] dream. A success, they say, but I say

he’s just another robot for the Combine and might be better off as a failure, like Ruckly sitting there

fumbling and drooling over his picture. He never does much else. The dwarf black boy gets a rise

out of him from time to time by leaning close and asking, “Say, Ruckly, what you figure your little

wife is doing in town tonight?” Ruckly’s head comes up. Memory whispers someplace in that

jumbled machinery. He turns red and his veins clog up at one end. This puffs him up so he can just

barely make a little whistling sound in his throat. Bubbles squeeze out the corner of his mouth, he’s

working his jaw so hard to say something. When he finally does get to where he can say his few

words it’s a low, choking noise to make your skin crawl—“Ffffff fuck da wife! Ffffff fuck da wife!” and

passes out on the spot from the effort.

Ellis and Ruckly are the youngest Chronics. Colonel Matterson is the oldest, an old, petrified

cavalry soldier from the First War who is given to lifting the skirts of passing nurses with his cane,

or teaching some kind of history out of the text of his left hand to anybody that’ll listen. He’s the

oldest on the ward, but not the one’s been here longest—his wife brought him in only a few years

back, when she got to where she wasn’t up to tending him any longer.

I’m the one been here on the ward the longest, since the Second World War. I been here on the

ward longer’n anybody. Longer’n any of the other patients. The Big Nurse has been here longer’n

me.

The Chronics and the Acutes don’t generally mingle. Each stays on his own side of the day room

the way the black boys want it. The black boys say it’s more orderly that way and let everybody

know that’s the way they’d like it to stay. They move us in after breakfast and look at the grouping

and nod. “That’s right, gennulmen, that’s the way. Now you keep it that way.”

Actually there isn’t much need for them to say anything, because, other than me, the Chronics

don’t move around much, and the Acutes say they’d just as leave stay over on their own side, give

reasons like the Chronic side smells worse than a dirty diaper. But I know it isn’t the stink that keeps

them away from the Chronic side so much as they don’t like to be reminded that here’s what could

happen to them someday. The Big Nurse recognizes this fear and knows how to put it to use; she’ll

point out to an Acute, whenever he goes into a sulk, that you boys be good boys and cooperate with

the staff policy which is engineered for your cure, or you’ll end up over on that side.

[22] (Everybody on the ward is proud of the way the patients cooperate. We got a little brass

tablet tacked to a piece of maple wood that has printed on it: CONGRATULATIONS FOR GETTING

ALONG WITH THE SMALLEST NUMBER OF PERSONNEL OF ANY WARD IN THE HOSPITAL. It’s a

prize for cooperation. It’s hung on the wall right above the log book, right square in the middle

between the Chronics and Acutes.)

This new redheaded Admission, McMurphy, knows right away he’s not a Chronic. After he

checks the day room over a minute, he sees he’s meant for the Acute side and goes right for it,

grinning and shaking hands with everybody he comes to. At first I see that he’s making everybody

over there feel uneasy, with all his kidding and joking and with the brassy way he hollers at that black

boy who’s still after him with a thermometer, and especially with that big wide-open laugh of his.

Dials twitch in the control panel at the sound of it. The Acutes look spooked and uneasy when he

laughs, the way kids look in a schoolroom when one ornery kid is raising too much hell with the

14

Ken Kesey one flew over the cuckoo’s nest

teacher out of the room and they’re all scared the teacher might pop back in and take it into her

head to make them all stay after. They’re fidgeting and twitching, responding to the dials in the

control panel; I see McMurphy notices he’s making them uneasy, but he don’t let it slow him down.

“Damn, what a sorry-looking outfit. You boys don’t look so crazy to me.” He’s trying to get

them to loosen up, the way you see an auctioneer spinning jokes to loosen up the crowd before the

bidding starts. “Which one of you claims to be the craziest? Which one is the biggest loony? Who

runs these card games? It’s my first day, and what I like to do is make a good impression straight off

on the right man if he can prove to me he is the right man. Who’s the bull goose loony here?”

He’s saying this directly to Billy Bibbit. He leans down and glares so hard at Billy that Billy feels

compelled to stutter out that he isn’t the buh-buh-buh-bull goose loony yet, though he’s next in luhluh-line for the job.

McMurphy sticks a big hand down in front of Billy, and Billy can’t do a thing but shake it. “Well,

buddy,” he says to Billy, “I’m truly glad you’re next in luh-line for the job, but since I’m thinking

about taking over this whole show myself, lock, stock, and barrel, maybe I better talk with the top

man.” He looks round to where some of the Acutes have stopped their card-playing, covers one of

his hands with the other, and cracks all his knuckles at the sight. “I figure, you see, buddy, to be sort

of the gambling baron on this ward, deal a wicked game of [23] blackjack. So you better take me to

your leader and we’ll get it straightened out who’s gonna be boss around here.”

Nobody’s sure if this barrel-chested man with the, scar and the wild grin is play-acting or if he’s

crazy enough to be just like he talks, or both, but they are all beginning to get a big kick out of going

along with him. They watch as he puts that big red hand on Billy’s thin arm, waiting to see what Billy

will say. Billy sees how it’s up to him to break the silence, so he looks around and picks out one of

the pinochle-players: “Handing,” Billy says, “I guess it would b-b-be you. You’re p-president of PayPay-Patient’s Council. This m-man wants to talk to you.”

The Acutes are grinning now, not so uneasy any more, and glad that something out of the

ordinary’s going on. They all razz Harding, ask him if he’s bull goose loony. He lays down his cards.

Harding is a flat, nervous man with a face that sometimes makes you think you seen him in the

movies, like it’s a face too pretty to just be a guy on the street. He’s got wide, thin shoulders and he

curves them in around his chest when he’s trying to hide inside himself. He’s got hands so long and

white and dainty I think they carved each other out of soap, and sometimes they get loose and glide

around in front of him free as two white birds until he notices them and traps them between his

knees; it bothers him that he’s got pretty hands.

He’s president of the Patient’s Council on account of he has a paper that says he graduated from

college. The paper’s framed and sits on his nightstand next to a picture of a woman in a bathing suit

who also looks like you’ve seen her in the moving pictures—she’s got very big breasts and she’s

holding the top of the bathing suit up over them with her fingers and looking sideways at the

camera. You can see Harding sitting on a towel behind her, looking skinny in his bathing suit, like

he’s waiting for some big guy to kick sand on him. Harding brags a lot about having such a woman

for a wife, says she’s the sexiest woman in the world and she can’t get enough of him nights.

When Billy points him out Harding leans back in his chair and assumes an important look, speaks

up at the ceiling without looking at Billy or McMurphy. “Does this ... gentleman have an

appointment, Mr. Bibbit?”

“Do you have an appointment, Mr. McM-m-murphy? Mr. Harding is a busy man, nobody sees

him without an ap-appointment.”

“This busy man Mr. Harding, is he the bull goose loony?” [24] He looks at Billy with one eye, and

Billy nods his head up and down real fast; Billy’s tickled with all the attention he’s getting.

“Then you tell Bull Goose Loony Harding that R. P. McMurphy is waiting to see him and that

this hospital ain’t big enough for the two of us. I’m accustomed to being top man. I been a bull

15

Ken Kesey one flew over the cuckoo’s nest

goose catskinner for every gyppo logging operation in the Northwest and bull goose gambler all the

way from Korea, was even bull goose pea weeder on that pea farm at Pendleton—so I figure if I’m

bound to be a loony, then I’m bound to be a stompdown dadgum good one. Tell this Harding that

he either meets me man to man or he’s a yaller skunk and better be outta town by sunset.”

Harding leans farther back, hooks his thumbs in his lapels. “Bibbit, you tell this young upstart

McMurphy that I’ll meet him in the main hall at high noon and we’ll settle this affair once and for

all, libidos a-blazin’.” Harding tries to drawl like McMurphy; it sounds funny with his high, breathy

voice. “You might also warn him, just to be fair, that I have been bull goose loony on this ward for

nigh onto two years, and that I’m crazier than any man alive.”

“Mr. Bibbit, you might warn this Mr. Harding that I’m so crazy I admit to voting for

Eisenhower.”

“Bibbit! You tell Mr. McMurphy I’m so crazy I voted for Eisenhower twice!”

“And you tell Mr. Harding right back”—he puts both hands on the table and leans down, his

voice getting low—“that I’m so crazy I plan to vote for Eisenhower again this November.”

“I take off my hat,” Harding says, bows his head, and shakes hands with McMurphy. There’s no

doubt in my mind that McMurphy’s won, but I’m not sure just what.

All the other Acutes leave what they’ve been doing and ease up close to see what new sort this

fellow is. Nobody like him’s ever been on the ward before. They’re asking him where he’s from and

what his business is in a way I’ve never seen them do before. He says he’s a dedicated man. He says

he was just a wanderer and logging bum before the Army took him and taught him what his natural

bent was; just like they taught some men to goldbrick and some men to goof off, he says, they

taught him to play poker. Since then he’s settled down and devoted himself to gambling on all levels.

Just play poker and stay single and live where and how he wants to, if people would let him, he says,

“but you know how society persecutes a dedicated man. Ever since I found my callin’ I done time in

so many small-town jails I could write a brochure. They say I’m [25] a habitual hassler. Like I fight

some. Sheeut. They didn’t mind so much when I was a dumb logger and got into a hassle; that’s

excusable, they say, that’s a hard-workin’ feller blowing off steam, they say. But if you’re a gambler, if

they know you to get up a back-room game now and then, all you have to do is spit slantwise and

you’re a goddamned criminal. Hooee, it was breaking up the budget drivin’ me to and from the

pokey for a while there.”

He shakes his head and puffs out his cheeks.

“But that was just for a period of time. I learned the ropes. To tell the truth, this ‘sault and

battery I was doing in Pendleton was the first hitch in close to a year. That’s why I got busted. I was

outa practice; this guy was able to get up off the floor and get to the cops before I left town. A very

tough individual …”

He laughs again and shakes hands and sits down to arm wrestle every time that black boy gets

too near him with the thermometer, till he’s met everybody on the Acute side. And when he finishes

shaking hands with the last Acute he comes right on over to the Chronics, like we aren’t no

different. You can’t tell if he’s really this friendly or if he’s got some gambler’s reason for trying to

get acquainted with guys so far gone a lot of them don’t even know their names.

He’s there pulling Ellis’s hand off the wall and shaking it just like he was a politician running for

something and Ellis’s vote was good as anybody’s. “Buddy,” he says to Ellis in a solemn voice, “my

name is R. P. McMurphy and I don’t like to see a full-grown man sloshin’ around in his own water.

Whyn’t you go get dried up?”

Ellis looks down at the puddle around his feet in pure surprise. “Why, I thank you,” he says and

even moves off a few steps toward the latrine before the nails pull his hands back to the wall.

McMurphy comes down the line of Chronics, shakes hands with Colonel Matterson and with

Ruckly and with Old Pete. He shakes the hands of Wheelers and Walkers and Vegetables, shakes

16

Ken Kesey one flew over the cuckoo’s nest

hands that he has to pick up out of laps like picking up dead birds, mechanical birds, wonders of tiny

bones and wires that have run down and fallen. Shakes hands with everybody he comes to except

Big George the water freak, who grins and shies back from that unsanitary hand, so McMurphy just

salutes him and says to his own right hand as he walks away, “Hand, how do you suppose that old

fellow knew all the evil you been into?”

Nobody can make out what he’s driving at, or why he’s [26] making such a fuss with meeting

everybody, but it’s better’n mixing jigsaw puzzles. He keeps saying it’s a necessary thing to get

around and meet the men he’ll be dealing with, part of a gambler’s job. But he must know he ain’t

going to be dealing with no eighty-year-old organic who couldn’t do any more with a playing card

than put it in his mouth and gum it awhile. Yet he looks like he’s enjoying himself, like he’s the sort

of guy that gets a laugh out of people.

I’m the last one. Still strapped in the chair in the corner. McMurphy stops when he gets to me

and hooks his thumbs in his pockets again and leans back to laugh, like he sees something funnier

about me than about anybody else. All of a sudden I was scared he was laughing because he knew

the way I was sitting there with my knees pulled up and my arms wrapped around them, staring

straight ahead as though I couldn’t hear a thing, was all an act.

“Hooeee,” he said, “look what we got here.”

I remember all this part real clear. I remember the way he closed one eye and tipped his head

back and looked down across that healing wine-colored scar on his nose, laughing at me. I thought

at first that he was laughing because of how funny it looked, an Indian’s face and black, oily Indian’s

hair on somebody like me. I thought maybe he was laughing at how weak I looked. But then’s when

I remember thinking that he was laughing because he wasn’t fooled for one minute by my deaf-anddumb act; it didn’t make any difference how cagey the act was, he was onto me and was laughing and

winking to let me know it.

“What’s your story, Big Chief? You look like Sittin’ Bull on a sitdown strike.” He looked over to

the Acutes to see if they might laugh about his joke; when they just sniggered he looked back to me

and winked again. “What’s your name, Chief?”

Billy Bibbit called across the room. “His n-n-name is Bromden. Chief Bromden. Everybody calls

him Chief Buh-Broom, though, because the aides have him sweeping a l-large part of the time.

There’s not m-much else he can do, I guess. He’s deaf.” Billy put his chin in hands. “If I was d-ddeaf”—he sighed—“I would kill myself.”

McMurphy kept looking at me. “He gets his growth, he’ll be pretty good-sized, won’t he? I

wonder how tall he is.”

“I think somebody m-m-measured him once at s-six feet seven; but even if he is big, he’s scared

of his own sh-sh-shadow. Just a bi-big deaf Indian.”

“When I saw him sittin’ here I thought he looked some Indian. But Bromden ain’t an Indian name.

What tribe is he?”

[27] “I don’t know,” Billy said. “He was here wh-when I c-came.”

“I have information from the doctor,” Harding said, “that he is only half Indian, a Columbia

Indian, I believe. That’s a defunct Columbia Gorge tribe. The doctor said his father was the tribal

leader, hence this fellow’s title, ‘Chief.’ As to the ‘Bromden’ part of the name, I’m afraid my

knowledge in Indian lore doesn’t cover that.”

McMurphy leaned his head down near mine where I had to look at him. “Is that right? You deef,

Chief?”

“He’s de-de-deef and dumb.”

McMurphy puckered his lips and looked at my face a long time. Then he straightened back up

and stuck his hand out. “Well, what the hell, he can shake hands can’t he? Deef or whatever. By

17

Ken Kesey one flew over the cuckoo’s nest

God, Chief, you may be big, but you shake my hand or I’ll consider it an insult. And it’s not a good

idea to insult the new bull goose loony of the hospital.”

When he said that he looked back over to Harding and Billy and made a face, but he left that

hand in front of me, big as a dinner plate.

I remember real clear the way that hand looked: there was carbon under the fingernails where

he’d worked once in a garage; there was an anchor tattooed back from the knuckles; there was a

dirty Band-Aid on the middle knuckle, peeling up at the edge. All the rest of the knuckles were

covered with scars and cuts, old and new. I remember the palm was smooth and hard as bone from

hefting the wooden handles of axes and hoes, not the hand you’d think could deal cards. The palm

was callused, and the calluses were cracked, and dirt was worked in the cracks. A road map of his

travels up and down the West. That palm made a scuffing sound against my hand. I remember the

fingers were thick and strong closing over mine, and my hand commenced to feel peculiar and went

to swelling up out there on my stick of an arm, like he was transmitting his own blood into it. It rang

with blood and power: It blowed up near as big as his, I remember. ...

“Mr. McMurry.”

It’s the Big Nurse.

“Mr. McMurry, could you come here please?”

It’s the Big Nurse. That black boy with the thermometer has gone and got her. She stands there

tapping that thermometer against her wrist watch, eyes whirring while she tries to gauge this new

man. Her lips are in that triangle shape, like a doll’s lips ready for a fake nipple.

“Aide Williams tells me, Mr. McMurry, that you’ve been somewhat difficult about your admission

shower. Is this true? [28] Please understand, I appreciate the way you’ve taken it upon yourself to

orient with the other patients on the ward, but everything in its own good time, Mr. McMurry. I’m

sorry to interrupt you and Mr. Bromden, but you do understand: everyone ... must follow the rules.”

He tips his head back and gives that wink that she isn’t fooling him any more than I did, that he’s

onto her. He looks up at her with one eye for a minute.

“Ya know, ma’am,” he says, “ya know—that is the ex- act thing somebody always tells me about

the rules ...”

He grins. They both smile back and forth at each other, sizing each other up.

“… just when they figure I’m about to do the dead opposite.”

Then he lets go my hand.

18

Ken Kesey one flew over the cuckoo’s nest

4

In the glass Station the Big Nurse has opened a package from a foreign address and is sucking

into hypodermic needles the grass-and-milk liquid that came in vial in the package. One of the little

nurses, a girl with one wandering eye that always keeps looking worried over her shoulder while the

other one goes about its usual business, picks up the little tray of filled needles but doesn’t carry

them away just yet.

“What, Miss Ratched, is your opinion of this new patient? I mean, gee, he’s good-looking and

friendly and everything, but in my humble opinion he certainly takes over.”

The Big Nurse tests a needle against her fingertip. “I’m afraid”—she stabs the needle down in the

rubber-capped vial and lifts the plunger—“that is exactly what the new patient is planning: to take

over. He is what we call a ‘manipulator,’ Miss Flinn, a man who will use everyone and everything to

his own ends.”

“Oh. But. I mean, in a mental hospital? What could his ends be?”

“Any number of things.” She’s calm, smiling, lost in the work of loading the needles. “Comfort

and an easy life, for instance; the feeling of power and respect, perhaps; monetary gain—perhaps all

of these things. Sometimes a manipulator’s own ends are simply the actual disruption of the ward for

the sake of disruption. There are such people in our society. A manipulator can influence the other

patients and disrupt them to such an extent that it may take months to get everything running

smooth once more. With the present permissive philosophy in mental hospitals, it’s easy for them to

get away with it. Some years back it was quite different. I recall some years back we had a man, a Mr.

Taber, on the ward, and he was an intolerable Ward Manipulator. For a while.” She looks up from her

work, needle half filled in front of her face like a little wand. Her eyes get far-off and pleased with

the memory. “Mistur Tay-bur,” she says.

“But, gee,” the other nurse says, “what on earth would make a man want to do something like

disrupt the ward for, Miss Ratched? What possible motive …?”

[30] She cuts the little nurse off by jabbing the needle back into the vial’s rubber top, fills it, jerks

it out, and lays it on the tray. I watch her hand reach for another empty needle, watch it dart out,

hinge over it, drop.

“You seem to forget, Miss Flinn, that this is an institution for the insane.”

The Big Nurse tends to get real put out if something keeps her outfit from running like a smooth,

accurate, precision-made machine. The slightest thing messy or out of kilter or in the way ties her

into a little white knot of tight-smiled fury. She walks around with that same doll smile crimped

between her chin and her nose and that same calm whir coming from her eyes, but down inside of

her she’s tense as steel. I know, I can feel it. And she don’t relax a hair till she gets the nuisance

attended to—what she calls “adjusted to surroundings.”

Under her rule the ward Inside is almost completely adjusted to surroundings. But the thing is

she can’t be on the ward all the time. She’s got to spend some time Outside. So she works with an

eye to adjusting the Outside world too. Working alongside others like her who I call the “Combine,”

which is a huge organization that aims to adjust the Outside as well as she has the Inside, has made

her a real veteran at adjusting things. She was already the Big Nurse in the old place when I came in

from the Outside so long back, and she’d been dedicating herself to adjustment for God knows how

long.

And I’ve watched her get more and more skillful over the years. Practice has steadied and

strengthened her until now she wields a sure power that extends in all directions on hairlike wires

too small for anybody’s eye but mine; I see her sit in the center of this web of wires like a watchful

19

Ken Kesey one flew over the cuckoo’s nest

robot, tend her network with mechanical insect skill, know every second which wire runs where and

just what current to send up to get the results she wants. I was an electrician’s assistant in training

camp before the Army shipped me to Germany and I had some electronics in my year in college is

how I learned about the way these things can be rigged.

What she dreams of there in the center of those wires is a world of precision efficiency and

tidiness like a pocket watch with a glass back, a place where the schedule is unbreakable and all the

patients who aren’t Outside, obedient under her beam, are wheelchair Chronics with catheter tubes

run direct from every pantleg to the sewer under the floor. Year by year [31] she accumulates her

ideal staff: doctors, all ages and types, come and rise up in front of her with ideas of their own about

the way a ward should be run, some with backbone enough to stand behind their ideas, and she fixes

these doctors with dry-ice eyes day in, day out, until they retreat with unnatural chills. “I tell you I

don’t know what it is,” they tell the guy in charge of personnel. “Since I started on that ward with

that woman I feel like my veins are running ammonia. I shiver all the time, my kids won’t sit in my

lap, my wife won’t sleep with me. I insist on a transfer—neurology bin, the alky tank, pediatrics, I

just don’t care!”

She keeps this up for years. The doctors last three weeks, three months. Until she finally settles

for a little man with a big wide forehead and wide jewly cheeks and squeezed narrow across his tiny

eyes like he once wore glasses that were way too small, wore them for so long they crimped his face

in the middle, so now he has glasses on a string to his collar button; they teeter on the purple bridge

of his little nose and they are always slipping one side or the other so he’ll tip his head when he talks

just to keep his glasses level. That’s her doctor.

Her three daytime black boys she acquires after more years of testing and rejecting thousands.

They come at her in a long black row of sulky, big-nosed masks, hating her and her chalk doll

whiteness from the first look they get. She appraises them and their hate for a month or so, then lets

them go because they don’t hate enough. When she finally gets the three she wants—gets them one

at a time over a number of years, weaving them into her plan and her network—she’s damn positive

they hate enough to be capable.

The first one she gets five years after I been on the ward, a twisted sinewy dwarf the color of cold

asphalt. His mother was raped in Georgia while his papa stood by tied to the hot iron stove with

plow traces, blood streaming into his shoes. The boy watched from a closet, five years old and

squinting his eye to peep out the crack between the door and the jamb, and he never grew an inch

after. Now his eyelids hang loose and thin from his brow like he’s got a bat perched on the bridge of

his nose. Eyelids like thin gray leather, he lifts them up just a bit whenever a new white man comes

on the ward, peeks out from under them and studies the man up and down and nods just once like

he’s oh yes made positive certain of something he was already sure of. He wanted to carry a sock full

of birdshot when he first came on the job, to work the patients into shape, but she told him they

didn’t do it that way [32] anymore, made him leave the sap at home and taught him her own

technique; taught him not to show his hate and to be calm and wait, wait for a little advantage, a

little slack, then twist the rope and keep the pressure steady. All the time. That’s the way you get

them into shape, she taught him.

The other two black boys come two years later, coming to work only about a month apart and

both looking so much alike I think she had a replica made of the one who came first. They are tall

and sharp and bony and their faces are chipped into expressions that never change, like flint

arrowheads. Their eyes come to points. If you brush against their hair it rasps the hide right off you.

All of them black as telephones. The blacker they are, she learned from that long dark row that

came before them, the more time they are likely to devote to cleaning and scrubbing and keeping the

ward in order. For instance, all three of these boys’ uniforms are always spotless as snow. White and

cold and stiff as her own.

20

Ken Kesey one flew over the cuckoo’s nest

All three wear starched snow-white pants and white shirts with metal snaps down one side and

white shoes polished like ice, and the shoes have red rubber soles silent as mice up and down the

hall. They never make any noise when they move. They materialize in different parts of the ward

every time a patient figures to check himself in private or whisper some secret to another guy. A

patient’ll be in a corner all by himself, when all of a sudden there’s a squeak and frost forms along

his cheek, and he turns in that direction and there’s a cold stone mask floating above him against the

wall. He just sees the black face. No body. The walls are white as the white suits, polished clean as a

refrigerator door, and the black face and hands seem to float against it like a ghost.

Years of training, and all three black boys tune in closer and closer with the Big Nurse’s

frequency. One by one they are able to disconnect the direct wires and operate on beams. She never

gives orders out loud or leaves written instructions that might be found by a visiting wife or

schoolteacher. Doesn’t need to any more. They are in contact on a high-voltage wave length of hate,

and the black boys are out there performing her bidding before she even thinks it.

So after the nurse gets her staff, efficiency locks the ward like a watchman’s clock. Everything the

guys think and say and do is all worked out months in advance, based on the little notes the nurse

makes during the day. This is typed and fed into the machine I hear humming behind the steel door

in the rear of the Nurses’ Station. A number of Order Daily [33] Cards are returned, punched with a

pattern of little square holes. At the beginning of each day the properly dated OD card is inserted in

a slot in the steel door and the walls hum up: Lights flash on in the dorm at six-thirty: the Acutes up

out of bed quick as the black boys can prod them out, get them to work buffing the floor, emptying

ash trays, polishing the scratch marks off the wall where one old fellow shorted out a day ago, went

down in an awful twist of smoke and smell of burned rubber. The Wheelers swing dead log legs out

on the floor and wait like seated statues for somebody to roll chairs in to them. The Vegetables piss

the bed, activating an electric shock and buzzer, rolls them off on the tile where the black boys can

hose them down and get them in clean greens. …

Six-forty-five the shavers buzz and the Acutes line up in alphabetical order at the mirrors, A, B, C,

D. ... The walking Chronics like me walk in when the Acutes are done, then the Wheelers are

wheeled in. The three old guys left, a film of yellow mold on the loose hide under their chins, they

get shaved in their lounge chairs in the day room, a leather strap across the forehead to keep them

from flopping around under the shaver.

Some mornings—Mondays especially—I hide and try to buck the schedule. Other mornings I

figure it’s cagier to step right into place between A and C in the alphabet and move the route like

everybody else, without lifting my feet—powerful magnets in the floor maneuver personnel through

the ward like arcade puppets. ...

Seven o’clock the mess hall opens and the order of line-up reverses: the Wheelers first, then the

Walkers, then the Acutes pick up trays, corn flakes, bacon and eggs, toast—and this morning a

canned peach on a piece of green, torn lettuce. Some of the Acutes bring trays to the Wheelers.

Most Wheelers are just Chronics with bad legs, they feed themselves, but there’s these three of them

got no action from the neck down whatsoever, not much from the neck up. These are called

Vegetables. The black boys push them in after everybody else is sat down, wheel them against a wall,

and bring them identical trays of muddy-looking food with little white diet cards attached to the

trays. Mechanical Soft, reads the diet cards for these toothless three: eggs, ham, toast, bacon, all

chewed thirty-two times apiece by the stainless-steel machine in the kitchen. I see it purse sectioned

lips, like a vacuum-cleaner hose, and spurt a clot of chewed-up ham onto a plate with a barnyard

sound.

[34] The black boys stoke the sucking pink mouths of the Vegetables a shade too fast for

swallowing, and the Mechanical Soft squeezes out down their little knobs of chins onto the greens.

The black boys cuss the Vegetables and ream the mouths bigger with a twisting motion of the

21

Ken Kesey one flew over the cuckoo’s nest

spoon, like coring a rotten apple: “This ol’ fart Blastic, he’s comin’ to pieces befo’ my very eyes. I

can’t tell no more if I’m feeding him bacon puree or chunks of his own fuckin’ tongue.” …

Seven-thirty back to the day room. The Big Nurse looks out through her special glass, always

polished till you can’t tell it’s there, and nods at what she sees, reaches up and tears a sheet off her

calendar one day closer to the goal. She pushes a button for things to start. I hear the wharrup of a

big sheet of tin being shook someplace. Everybody come to order. Acutes: sit on your side of the

day room and wait for cards and Monopoly games to be brought out. Chronics: sit on your side and

wait for puzzles from the Red Cross box. Ellis: go to your place at the wall, hands up to receive the

nails and pee running down your leg. Pete: wag your head like a puppet. Scanlon: work your knobby

hands on the table in front of you, constructing a make-believe bomb to blow up a make-believe

world. Harding: begin talking, waving your dove hands in the air, then trap them under your armpits

because grown men aren’t supposed to wave their pretty hands that way. Sefelt: begin moaning

about your teeth hurting and your hair falling out. Everybody: breath in ... and out … in perfect

order; hearts all beating at the rate the OD cards have ordered. Sound of matched cylinders.

Like a cartoon world, where the figures are flat and outlined in black, jerking through some kind

of goofy story that might be real funny if it weren’t for the cartoon figures being real guys ...

Seven-forty-five the black boys move down the line of Chronics taping catheters on the ones that

will hold still for it. Catheters are second-hand condoms the ends clipped off and rubber-banded to

tubes that run down pantlegs to a plastic sack marked DISPOSABLE NOT TO BE RE-USED, which it is

my job to wash out at the end of each day. The black boys anchor the condom by taping it to the

hairs; old Catheter Chronics are hairless as babies from tape removal. …

Eight o’clock the walls whirr and hum into full swing. The speaker in the ceiling says,

“Medications,” using the Big Nurse’s voice. We look in the glass case where she sits, but she’s

nowhere near the microphone; in fact, she’s ten feet away from the microphone, tutoring one of the

little nurses [35] how to prepare a neat drug tray with pills arranged orderly. The Acutes line up at

the glass door, A, B, C, D, then the Chronics, then the Wheelers (the Vegetables get theirs later, mixed

in a spoon of applesauce). The guys file by and get a capsule in a paper cup—throw it to the back of

the throat and get the cup filled with water by the little nurse and wash the capsule down. On rare

occasions some fool might ask what he’s being required to swallow.

“Wait just a shake, honey; what are these two little red capsules in here with my vitamin?”

I know him. He’s a big, griping Acute, already getting the reputation of being a troublemaker.

“It’s just medication, Mr. Taber, good for you. Down it goes, now.”

“But I mean what kind of medication. Christ, I can see that they’re pills—”

“Just swallow it all, shall we, Mr. Taber—just for me?” She takes a quick look at the Big Nurse to

see how the little flirting technique she is using is accepted, then looks back at the Acute. He still

isn’t ready to swallow something he don’t know what is, not even just for her.

“Miss, I don’t like to create trouble. But I don’t like to swallow something without knowing what

it is, neither. How do I know this isn’t one of those funny pills that makes me something I’m not?”

“Don’t get upset, Mr. Taber—”

“Upset? All I want to know, for the lova Jesus—”

But the Big Nurse has come up quietly, locked her hand on his arm, paralyzes him all the way to

the shoulder. “That’s all right, Miss Flinn,” she says. “If Mr. Taber chooses to act like a child, he

may have to be treated as such. We’ve tried to be kind and considerate with him. Obviously, that’s

not the answer. Hostility, hostility, that’s the thanks we get. You can go, Mr. Taber, if you don’t wish

to take your medication orally.”

“All I wanted to know, for the—”

“You can go.”

22

Ken Kesey one flew over the cuckoo’s nest

He goes off, grumbling, when she frees his arm, and spends the morning moping around the

latrine, wondering about those capsules. I got away once holding one of those same red capsules

under my tongue, played like I’d swallowed it, and crushed it open later in the broom closet. For a

tick of time, before it all turned into white dust, I saw it was a miniature electronic element like the

ones I helped the Radar Corps work with in the Army, microscopic wires and grids and [36]

transistors, this one designed to dissolve on contact with air. …

Eight-twenty the cards and puzzles go out. …

Eight-twenty-five some Acute mentions he used to watch his sister taking her bath; the three

guys at the table with him fall all over each other to see who gets to write it in the log book. …

Eight-thirty the ward door opens and two technicians trot in, smelling like grape wine;

technicians always move at a fast walk or a trot because they’re always leaning so far forward they

have to move fast to keep standing. They always lean forward and they always smell like they

sterilized their instruments in wine. They pull the lab door to behind them, and I sweep up close and

can snake out voices over the vicious zzzth-zzzth-zzzth of steel on whetstone.

“What we got already at this ungodly hour of the morning?”

“We got to install an Indwelling Curiosity Cutout in some nosy booger. Hurry-up job, she says,

and I’m not even sure we got one of the gizmos in stock.”

“We might have to call IBM to rush one out for us; let me check back in Supply—”

“Hey; bring out a bottle of that pure grain while you’re back there: it’s getting so I can’t install the

simplest frigging component but what I need a bracer. Well, what the hell, it’s better’n garage work.

…”

Their voices are forced and too quick on the comeback to be real talk—more like cartoon

comedy speech. I sweep away before I’m caught eavesdropping.

The two big black boys catch Taber in the latrine and drag him. to the mattress room. He gets

one a good kick in the shins. He’s yelling bloody murder. I’m surprised how helpless he looks when

they hold him, like he was wrapped with bands of black iron.

They push him face down on the mattress. One sits on his head, and the other rips his pants

open in back and peels the cloth until Taber’s peach-colored rear is framed by the ragged lettucegreen. He’s smothering curses into the mattress and the black boy sitting on his head saying, “Tha’s

right, Mistuh Taber, tha’s right. ...” The nurse comes down the hall, smearing Vaseline on a long

needle, pulls the door shut so they’re out of sight for a second, then comes right back out, wiping

the needle on a shred of Taber’s pants. She’s left the Vaseline jar in the room. Before the black boy

can close the door after her I see the one still sitting on Taber’s head, [37] dabbing at him with a

Kleenex. They’re in there a long time before the door opens up again and they come out, carrying

him across the hall to the lab. His greens are ripped clear off now and he’s wrapped up in a damp

sheet. ...

Nine o’clock young residents wearing leather elbows talk to Acutes for fifty minutes about what

they did when they were little boys. The Big Nurse is suspicious of the crew-cut looks of these

residents, and that fifty minutes they are on the ward is a tough time for her. While they are around,

the machinery goes to fumbling and she is scowling and making notes to check the records of these

boys for old traffic violations and the like. …

Nine-fifty the residents leave and the machinery hums up smooth again. The nurse watches the

day room from her glass case; the scene before her takes on that blue-steel clarity again, that clean

orderly movement of a cartoon comedy.

Taber is wheeled out of the lab on a Gurney bed.

“We had to give him another shot when he started coming up during the spine tap,” the

technician tells her. “What do you say we take him right on over to Building One and buzz him with

EST while we’re at it—that way not waste the extra Seconal?”

23

Ken Kesey one flew over the cuckoo’s nest

“I think it is an excellent suggestion. Maybe after that take him to the electroencephalograph and

check his head—we may find evidence of a need for brain work.”

The technicians go trotting off, pushing the man on the Gurney, like cartoon men—or like

puppets, mechanical puppets in one of those Punch and Judy acts where it’s supposed to be funny

to see the puppet beat up by the Devil and swallowed headfirst by a smiling alligator. ...

Ten o’clock the mail comes up. Sometimes you get the torn envelope. ...

Ten-thirty Public Relation comes in with a ladies’ club following him. He claps his fat hands at

the day-room door. “Oh, hello guys; stiff lip, stiff lip ... look around, girls; isn’t it clean, so bright?

This is Miss Ratched. I chose this ward because it’s her ward. She’s, girls, just like a mother. Not that

I mean age, but you girls understand ...”

Public Relation’s shirt collar is so tight it bloats his face up when he laughs, and he’s laughing

most of the time I don’t ever know what at, laughing high and fast like he wishes he could stop but

can’t do it. And his face bloated up red and round as a balloon with a face painted on it. He got no

hair on his face and none on his head to speak of; it looks like he [38] glued some on once but it

kept slipping off and getting in his cuffs and his shirt pocket and down his collar. Maybe that’s why

he keeps his collar so tight, to keep the little pieces of hair from falling down in there.

Maybe that’s why he laughs so much, because he isn’t able to keep all the pieces out.

He conducts these tours—serious women in blazer jackets, nodding to him as he points out how

much things have improved over the years. He points out the TV, the big leather chairs, the sanitary

drinking fountains; then they all go have coffee in the Nurse’s Station. Sometimes he’ll be by himself

and just stand in the middle of the day room and clap his hands (you can hear they are wet), clap

them two or three times till they stick, then hold them prayer-like together under one of his chins

and start spinning. Spin round and around there in the middle of the floor, looking wild and frantic

at the TV, the new pictures on the walls, the sanitary drinking fountain. And laughing.

What he sees that’s so funny he don’t ever let us in on, and the only thing I can see funny is him

spinning round and around out there like a rubber toy—if you push him over he’s weighted on the

bottom and straightaway rocks back upright, goes to spinning again. He never, never looks at the

men’s faces. ...

Ten-forty, -forty-five, -fifty, patients shuttle in and out to appointments in ET or OT or PT, or in

queer little rooms somewhere where the walls are never the same size and the floors aren’t level. The

machinery sounds about you reach a steady cruising speed.

The ward hums the way I heard a cotton mill hum once when the football team played a high

school in California. After a good season one year the boosters in the town were so proud and

carried away that they paid to fly us to California to play a championship high-school team down

there. When we flew into the town we had to go visit some local industry. Our coach was one for

convincing folks that athletics was educational because of the learning afforded by travel, and every

trip we took he herded the team around to creameries and beet farms and canneries before the

game. In California it was the cotton mill. When we went in the mill most of the team took a look

and left to go sit in the bus over stud games on suitcases, but I stayed inside over in a corner out of

the way of the Negro girls running up and down the aisles of machines. The [39] mill put me in a

kind of dream, all the humming and clicking and rattling of people and machinery, jerking around in

a pattern. That’s why I stayed when the others left, that, and because it reminded me somehow of

the men in the tribe who’d left the village in the last days to do work on the gravel crusher for the

dam. The frenzied pattern, the faces hypnotized by routine ... I wanted to go out in the bus with the

team, but I couldn’t.

It was morning in early winter and I still had on the jacket they’d given us when we took the

championship—a red and green jacket with leather sleeves and a football-shaped emblem sewn on

24

Ken Kesey one flew over the cuckoo’s nest

the back telling what we’d won—and it was making a lot of the Negro girls stare. I took it off, but

they kept staring. I was a whole lot bigger in those days.

One of the girls left her machine and looked back and forth up the aisles to see if the foreman

was around, then came over to where I was standing. She asked if we was going to play the high

school that night and she told me she had a brother played tailback for them. We talked a piece

about football and the like and I noticed how her face looked blurred, like there was a mist between

me and her. It was the cotton fluff sifting from the air.

I told her about the fluff. She rolled her eyes and ducked her mouth to laugh in her fist when I

told her how it was like looking at her face out on a misty morning duck-hunting. And she said,

“Now what in the everlovin’ world would you want with me out alone in a duck blind?” I told her

she could take care of my gun, and the girls all over the mill went to giggling in their fists. I laughed

a little myself, seeing how clever I’d been. We were still talking and laughing when she grabbed both

my wrists and dug in. The features of her face snapped into brilliant focus; I saw she was terrified of

something.

“Do,” she said to me in a whisper, “do take me, big boy. Outa this here mill, outa this town, outa

this life. Take me to some ol’ duck blind someplace. Someplace else. Huh, big boy, huh?”

Her dark, pretty face glittered there in front of me. I stood with my mouth open, trying to think

of some way to answer her. We were locked together this way for maybe a couple of seconds; then

the sound of the mill jumped a hitch, and something commenced to draw her back away from me. A

string somewhere I didn’t see hooked on that flowered red skirt and was tugging her back. Her

fingernails peeled down my hands [40] and as soon as she broke contact with me her face switched

out of focus again, became soft and runny like melting chocolate behind that blowing fog of cotton.

She laughed and spun around and gave me a look of her yellow leg when the skirt billowed out. She

threw me a wink over her shoulder as she ran back to her machine where a pile of fiber was spilling

off the table to the floor; she grabbed it up and ran feather-footed down the aisle of machines to

dump the fiber in a hopper; then she was out of sight around the corner.

All those spindles reeling and wheeling and shuttles jumping around and bobbins wringing the air

with string, whitewashed walls and steel-gray machines and girls in flowered skirts skipping back and

forth, and the whole thing webbed with flowing white lines stringing the factory together—it all

stuck with me and every once in a while something on the ward calls it to mind.

Yes. This is what I know. The ward is a factory for the Combine. It’s for fixing up mistakes made

in the neighborhoods and in the schools and in the churches, the hospital is. When a completed

product goes back out into society, all fixed up good as new, better than new sometimes, it brings joy

to the Big Nurse’s heart; something that came in all twisted different is now a functioning, adjusted

component, a credit to the whole outfit and a marvel to behold. Watch him sliding across the land

with a welded grin, fitting into some nice little neighborhood where they’re just now digging

trenches along the street to lay pipes for city water. He’s happy with it. He’s adjusted to

surroundings finally. …

“Why, I’ve never seen anything to beat the change in Maxwell Taber since he’s got back from

that hospital; a little black and blue around the eyes, a little weight lost, and, you know what? he’s a

new man. Gad, modern American science ...”

And the light is on in his basement window way past midnight every night as the Delayed

Reaction Elements the technicians installed lend nimble skills to his fingers as he bends over the

doped figure of his wife, his two little girls just four and six, the neighbor he goes bowling with

Mondays; he adjusts them like he was adjusted. This is the way they spread it.

When he finally runs down after a pre-set number of years, the town loves him dearly and the

paper prints his picture helping the Boy Scouts last year on Graveyard Cleaning Day, and his wife

25

Ken Kesey one flew over the cuckoo’s nest

gets a letter from the principal of the high school how Maxwell Wilson Taber was an inspirational

figure to the youth of our fine community.

Even the embalmers, usually a pair of penny-pinching [41] tightwads, are swayed. “Yeah, look at

him there: old Max Taber, he was a good sort. What do you say we use that expensive thirty-weight

at no extra charge to his wife. No, what the dickens, let’s make it on the house.”

A successful Dismissal like this is a product brings joy to the Big Nurse’s heart and speaks good

of her craft and the whole industry in general. Everybody’s happy with a Dismissal.

But an Admission is a different story. Even the best-behaved Admission is bound to need some

work to swing into routine, and, also, you never can tell when just that certain one might come in

who’s free enough to foul things up right and left, really make a hell of a mess and constitute a threat

to the whole smoothness of the outfit. And, like I explain, the Big Nurse gets real put out if anything

keeps her outfit from running smooth.

26

Ken Kesey one flew over the cuckoo’s nest

5

Before noontime they’re at the fog machine again but they haven’t got it turned up full; it’s not so

thick but what I can see if I strain real hard. One of these days I’ll quit straining and let myself go

completely, lose myself in the fog the way some of the other Chronics have, but for the time being

I’m interested in this new man—I want to see how he takes to the Group Meeting coming up.

Ten minutes to one the fog dissolves completely and the black boys are telling Acutes to clear the

floor for the meeting. All the tables are carried out of the day room to the tub room across the

hall—leaves the floor, McMurphy says, like we was aiming to have us a little dance.

The Big Nurse watches all this through her window. She hasn’t moved from her spot in front of

that one window for three solid hours, not even for lunch. The day-room floor gets cleared of

tables, and at one o’clock the doctor comes out of his office down the hall, nods once at the nurse

as he goes past where she’s watching out her window, and sits in his chair just to the left of the door.

The patients sit down when he does; then the little nurses and the residents straggle in. When

everybody’s down, the Big Nurse gets up from behind her window and goes back to the rear of the

Nurses’ Station to that steel panel with dials and buttons on it, sets some kind of automatic pilot to

run things while she’s away, and comes out into the day room, carrying the log book and a basketful

of notes. Her uniform, even after she’s been here half a day, is still starched so stiff it don’t exactly

bend any place; it cracks sharp at the joints with a sound like a frozen canvas being folded.

She sits just to the right of the door.

Soon as she’s sat down, Old Pete Bancini sways to his feet and starts in wagging his head and

wheezing. “I’m tired. Whew. O Lord. Oh, I’m awful tired ...” the way he always does whenever

there’s a new man on the ward who might listen to him.

The Big Nurse doesn’t look over at Pete. She’s going through the papers in her basket.

“Somebody go sit beside Mr. Bancini,” she says. “Quiet him down so we can start the meeting.”

[43] Billy Bibbit goes. Pete has turned facing McMurphy and is lolling his head from side to side

like a signal light at a railroad crossing. He worked on the railroad thirty years; now he’s wore clean

out but still’s functioning on the memory.

“I’m ti-i-uhd,” he says, wagging his face at McMurphy. “Take it easy, Pete,” Billy says, lays a

freckled hand on Pete’s knee.

“… Awful tired ...”

“I know, Pete”—pats the skinny knee, and Pete pulls back his face, realizes nobody is going to

heed his complaint today. The nurse takes off her wrist watch and looks at the ward clock and winds

the watch and sets it face toward her in the basket. She takes a folder from the basket.

“Now. Shall we get into the meeting?”

She looks around to see if anybody else is about to interrupt her, smiling steady as her head turns

in her collar. The guys won’t meet her look; they’re all looking for hangnails. Except McMurphy.

He’s got himself an armchair in the corner, sits in it like he’s claimed it for good, and he’s watching

her every move. He’s still got his cap on, jammed tight down on his red head like he’s a motorcycle

racer. A deck of cards in his lap opens for a one-handed cut, then clacks shut with a sound blown up

loud by the silence. The nurse’s swinging eyes hang on him for a second. She’s been watching him

play poker all morning and though she hasn’t seen any money pass hands she suspects he’s not

exactly the type that is going to be happy with the ward rule of gambling for matches only. The deck

whispers open and clacks shut again and then disappears somewhere in one of those big palms.

The nurse looks at her watch again and pulls a slip of paper out of the folder she’s holding, looks

at it, and returns it to the folder. She puts the folder down and picks up the log book. Ellis coughs

from his place on the wall; she waits until he stops.

27

Ken Kesey one flew over the cuckoo’s nest

“Now. At the close of Friday’s meeting ... we were discussing Mr. Harding’s problem ...

concerning his young wife. He had stated that his wife was extremely well endowed in the bosom

and that this made him uneasy because she drew stares from men on the street.” She starts opening

to places in the log book; little slips of paper stick out of the top of the book to mark the pages.

“According to the notes listed by various patients in the log, Mr. Harding has been heard to say that

she ‘damn well gives the bastards reason to stare.’ He has also been heard to say that he may give her

reason to seek further sexual attention. He has been heard to say, ‘My dear [44] sweet but illiterate

wife thinks any word or gesture that does not smack of brickyard brawn and brutality is a word or

gesture of weak dandyism.’ ”

She continues reading silently from the book for a while, then closes it.

“He has also stated that his wife’s ample bosom at times gives him a feeling of inferiority. So.

Does anyone care to touch upon this subject further?”

Harding shuts his eyes, and nobody else says anything. McMurphy looks around at the other

guys, waiting to see if anybody is going to answer the nurse, then holds his hand up and snaps his

fingers, like a school kid in class; the nurse nods at him.

“Mr.—ah—McMurry?”

“Touch upon what?”

“What? Touch—”

“You ask, I believe, ‘Does anyone care to touch upon—’ ”

“Touch upon the—subject, Mr. McMurry, the subject of Mr. Harding’s problem with his wife.”

“Oh. I thought you mean touch upon her—something else.”

“Now what could you—”

But she stops. She was almost flustered for a second there. Some of the Acutes hide grins, and

McMurphy takes a huge stretch, yawns, winks at Harding. Then the nurse, calm as anything, puts the

log book back in the basket and takes out another folder and opens it and starts reading.

“McMurry, Randle Patrick. Committed by the state from the Pendleton Farm for Correction. For

diagnosis and possible treatment. Thirty-five years old. Never married. Distinguished Service Cross

in Korea, for leading an escape from a Communist prison camp. A dishonorable discharge,

afterward, for insubordination. Followed by a history of street brawls and barroom fights and a

series of arrests for Drunkenness, Assault and Battery, Disturbing the Peace, re peated gambling, and

one arrest—for Rape.”

“Rape?” The doctor perks up.

“Statutory, with a girl of—”

“Whoa. Couldn’t make that stick,” McMurphy says to the doctor. “Girl wouldn’t testify.”

“With a child of fifteen.”

“Said she was seventeen, Doc, and she was plenty willin’.” “A court doctor’s examination of the

child proved entry, re peated entry, the record states—”

“So willin’, in fact, I took to sewing my pants shut.”

“The child refused to testify in spite of the doctor’s findings. [45] There seemed to be

intimidation. Defendant left town shortly after the trial.”

“Hoo boy, I had to leave. Doc, let me tell you”—he leans forward with an elbow on a knee,

lowering his voice to the doctor across the room—“that little hustler would of actually burnt me to a

frazzle by the time she reached legal sixteen. She got to where she was tripping me and beating me

to the floor.”

The nurse closes up the folder and passes it across the doorway to the doctor. “Our new

Admission, Doctor Spivey,” just like she’s got a man folded up inside that yellow paper and can pass

him on to be looked over. “I thought I might brief you on his record later today, but as he seems to

insist on asserting himself in the Group Meeting, we might as well dispense with him now.”

28

Ken Kesey one flew over the cuckoo’s nest

The doctor fishes his glasses from his coat pocket by pulling on the string, works them on his

nose in front of his eyes. They’re tipped a little to the right, but he leans his head to the left and

brings them level. He’s smiling a little as he turns through the folder, just as tickled by this new

man’s brassy way of talking right up as the rest of us, but, just like the rest of us, he’s careful not to

let himself come right out and laugh. The doctor closes the folder when he gets to the end, and puts

his glasses back in his pocket. He looks to where McMurphy is still leaned out at him from across

the day room.

“You’ve—it seems—no other psychiatric history, Mr. McMurry?”

“Mc Murphy, Doc.”

“Oh? But I thought—the nurse was saying—”

He opens the folder again, fishes out those glasses, looks the record over for another minute

before he closes it, and puts his glasses back in his pocket. “Yes. McMurphy. That is correct. I beg

your pardon.”

“It’s okay, Doc. It was the lady there that started it, made the mistake. I’ve known some people

inclined to do that. I had this uncle whose name was Hallahan, and he went with a woman once who

kept acting like she couldn’t remember his name right and calling him Hooligan just to get his goat.

It went on for months before he stopped her. Stopped her good, too.”

“Oh? How did he stop her?” the doctor asks.

McMurphy grins and rubs his nose with his thumb. “Ah-ah, now, I can’t be tellin’ that. I keep

Unk Hallahan’s method a strict secret, you see, in case I need to use it myself someday.”

He says it right at the nurse. She smiles right back at him, [46] and he looks over at the doctor.

“Now; what was you asking about my record, Doc?”

“Yes. I was wondering if you’ve any previous psychiatric history. Any analysis, any time spent in

any other institution?”

“Well, counting state and county coolers—”

“Mental institutions.”

“Ah. No, if that’s the case. This is my first trip. But I am crazy, Doc. I swear I am. Well here—let

me show you here. I believe that other doctor at the work farm ...”

He gets up, slips the deck of cards in the pocket of his jacket, and comes across the room to lean

over the doctor’s shoulder and thumb through the folder in his lap. “Believe he wrote something,

back at the back here somewhere ...”

“Yes? I missed that. Just a moment.” The doctor fishes his glasses out again and puts them on

and looks to where McMurphy is pointing.

“Right here, Doc. The nurse left this part out while she was summarizing my record. Where it says,

‘Mr. McMurphy has evidenced repeated’—I just want to make sure I’m understood completely,

Doc—‘ repeated outbreaks of passion that suggest the possible diagnosis of psychopath.’ He told me

that’psychopath’ means I fight and fuh—pardon me, ladies—means I am he put it over zealous in my

sexual relations. Doctor, is that real serious?”

He asks it with such a little-boy look of worry and concern all over his broad, tough face that the

doctor can’t help bending his head to hide another little snicker in his collar, and his glasses fall from

his nose dead center back in his pocket. All of the Acutes are smiling too, now, and even some of

the Chronics.

“I mean that overzealousness, Doc, have you ever been troubled by it?”

The doctor wipes his eyes. “No, Mr. McMurphy, I’ll admit I haven’t. I am interested, however,

that the doctor at the work farm added this statement: ‘Don’t overlook the possibility that this man

might be feigning psychosis to escape the drudgery of the work farm.’ ” He looks up at McMurphy.

“And what about that, Mr. McMurphy?”

29

Ken Kesey one flew over the cuckoo’s nest

“Doctor”—he stands up to his full height, wrinkles his forehead, and holds out both arms, open

and honest to all the wide world—”do I look like a sane man?”

The doctor is working so hard to keep from giggling again he can’t answer. McMurphy pivots

away from the doctor and asks the same thing of the Big Nurse: “Do I?” Instead of answering she

stands up and takes the manila folder away from [47] the doctor and puts it back in the basket under

her watch. She sits back down.

“Perhaps, Doctor, you should advise Mr. McMurry on the protocol of these Group Meetings.”

“Ma’am,” McMurphy says, “have I told you about my uncle Hallahan and the woman who used

to screw up his name?”

She looks at him for a long time without her smile. She has the ability to turn her smile into

whatever expression she wants to use on somebody, but the look she turns it into is no different,

just a calculated and mechanical expression to serve her purpose. Finally she says, “I beg your

pardon, Mack-Murph-y.” She turns back to the doctor. “Now, Doctor, if you would explain ...”

The doctor folds his hands and leans back. “Yes. I suppose What I should do is explain the

complete theory of our Therapeutic Community, while we’re at it. Though I usually save it until later.

Yes. A good idea, Miss Ratched, a fine idea.”

“Certainly the theory too, doctor, but what I had in mind was the rule, that the patients remain

seated during the course of the meeting,”

“Yes. Of course. Then I will explain the theory. Mr. McMurphy, one of the first things is that the

patients remain seated during the course of the meeting. It’s the only way, you see, for us to

maintain order.”

“Sure, Doctor. I just got up to show you that thing in my record book.”

He goes over to his chair, gives another big stretch and yawn, sits down, and moves around for a

while like a dog coming to rest. When he’s comfortable, he looks over at the doctor, waiting.

“As to the theory ...” The doctor takes a deep, happy breath.

“Ffffuck da wife,” Ruckly says. McMurphy hides his mouth behind the back of his hand and calls

across the ward to Ruckly in a scratchy whisper, “Whose wife?” and Martini’s head snaps up, eyes

wide and staring. “Yeah,” he says, “whose wife? Oh. Her? Yeah, I see her. Yeah.”

“I’d give a lot to have that man’s eyes,” McMurphy says of Martini and then doesn’t say anything

all the rest of the meeting. Just sits and watches and doesn’t miss a thing that happens or a word

that’s said. The doctor talks about his theory until the Big Nurse finally decides he’s used up time

enough and asks him to hush so they can get on to Harding, and they talk the rest of the meeting

about that.

McMurphy sits forward in his chair a couple of times during [48] the meeting like he might have

something to say, but he decides better and leans back. There’s a puzzled expression coming over

his face. Something strange is going on here, he’s finding out. He can’t quite put his finger on it.

Like the way nobody will laugh. Now he thought sure there would be a laugh when he asked Ruckly,

“Whose wife?” but there wasn’t even a sign of one. The air is pressed in by the walls, too tight for

laughing. There’s something strange about a place where the men won’t let themselves loose and

laugh, something strange about the way they all knuckle under to that smiling flour-faced old mother

there with the too-red lipstick and the too-big boobs. And he thinks he’ll just wait a while to see

what the story is in this new place before he makes any kind of play. That’s a good rule for a smart

gambler: look the game over awhile before you draw yourself a hand.

I’ve heard that theory of the Therapeutic Community enough times to repeat it forwards and

backwards—how a guy has to learn to get along in a group before he’ll be able to function in a

normal society; how the group can help the guy by showing him where he’s out of place; how

society is what decides who’s sane and who isn’t, so you got to measure up. All that stuff. Every

30

Ken Kesey one flew over the cuckoo’s nest

time we get a new patient on the ward the doctor goes into the theory with both feet; it’s pretty near

the only time he takes things over and runs the meeting. He tells how the goal of the Therapeutic

Community is a democratic ward, run completely by the patients and their votes, working toward

making worth-while citizens to turn back Outside onto the street. Any little gripe, any grievance,

anything you want changed, he says, should be brought up before the group and discussed instead of

letting it fester inside of you. Also you should feel at ease in your surroundings to the extent you can

freely discuss emotional problems in front of patients and staff. Talk, he says, discuss, confess. And

if you hear a friend say something during the course of your everyday conversation, then list it in the

log book for the staff to see. It’s not, as the movies call it, “squealing,” it’s helping your fellow. Bring

these old sins into the open where they can be washed by the sight of all. And participate in Group

Discussion. Help yourself and your friends probe into the secrets of the subconscious. There should

be no need for secrets among friends.

Our intention, he usually ends by saying, is to make this as much like your own democratic, free

neighborhoods as possible—a little world Inside that is a made-to-scale prototype of [49] the big

world Outside that you will one day be taking your place in again.

He’s maybe got more to say, but about this point the Big Nurse usually hushes him, and in the

lull old Pete stands up and wigwags that battered copper-pot head and tells everybody how tired he

is, and the nurse tells somebody to go hush him up too, so the meeting can continue, and Pete is

generally hushed and the meeting goes on.

Once, just one time that I can remember, four or five years back, did it go any different. The

doctor had finished his spiel, and the nurse had opened right up with, “Now. Who will start? Let out

those old secrets.” And she’d put all the Acutes in a trance by sitting there in silence for twenty

minutes after the question, quiet as an electric alarm about to go off, waiting for somebody to start

telling something about themselves. Her eyes swept back and forth over them as steady as a turning

beacon. The day room was clamped silent for twenty long minutes, with all of the patients stunned

where they sat. When twenty minutes had passed, she looked at her watch and said, “Am I to take it

that there’s not a man among you that has committed some act that he has never admitted?” She

reached in the basket for the log book. “Must we go over past history?”

That triggered something, some acoustic device in the walls, rigged to turn on at just the sound of

those words coming from her mouth. The Acutes stiffened. Their mouths opened in unison. Her

sweeping eyes stopped on the first man along the wall.

His mouth worked. “I robbed a cash register in a service station.”

She moved to the next man.

“I tried to take my little sister to bed.”

Her eyes clicked to the next man; each one jumped like a shooting-gallery target.

“I—one time—wanted to take my brother to bed.”

“I killed my cat when I was six. Oh, God forgive me, I stoned her to death and said my neighbor

did it.”

“I lied about trying. I did take my sister!”

“So did I! So did I!”

“And me! And me!”

It was better than she’d dreamed. They were all shouting to outdo one another, going further and

further, no way of stopping, telling things that wouldn’t ever let them look one another in the eye

again. The nurse nodding at each confession and saying Yes, yes, yes.

Then old Pete was on his feet. “I’m tired!” was what he [50] shouted, a strong, angry copper tone

to his voice that no one had ever heard before.

Everyone hushed. They were somehow ashamed. It was as if he had suddenly said something

that was real and true and important and it had put all their childish hollering to shame. The Big

31

Ken Kesey one flew over the cuckoo’s nest

Nurse was furious. She swiveled and glared at him, the smile dripping over her chin; she’d just had it

going so good.

“Somebody see to poor Mr. Bancini,” she said.

Two or three got up. They tried to soothe him, pat him on his shoulder. But Pete wasn’t being

hushed. “Tired! Tired!” he kept on.

Finally the nurse sent one of the black boys to take him out of the day room by force. She forgot

that the black boys didn’t hold any control over people like Pete.

Pete’s been a Chronic all his life. Even though he didn’t come into the hospital till he was better

than fifty, he’d always been a Chronic. His head has two big dents, one on each side, where the

doctor who was with his mother at horning time pinched his skull trying to pull him out. Pete had

looked out first and seer. all the delivery-room machinery waiting for him and somehow realized

what he was being born into, and had grabbed on to everything handy in there to try to stave off

being born. The doctor reached in and got him by the head with a set of dulled ice tongs and jerked

him loose and figured everything was all right. But Pete’s head was still too new, and soft as clay,

and when it set, those two dents left by the tongs stayed. And this made him simple to where it took

all his straining effort and concentration and will power just to do the tasks that came easy to a kid

of six.

But one good thing—being simple like that put him out of the clutch of the Combine. They

weren’t able to mold him into a slot. So they let him get a simple job on the railroad, where all he

had to do was sit in a little clapboard house way out in the sticks on a lonely switch and wave a red

lantern at the trains if the switch was one way, and a green one if it was the other, and a yellow one

if there was a train someplace up ahead. And he did it, with main force and a gutpower they couldn’t

mash out of his head, out by himself on that switch. And he never had any controls installed.

That’s why the black boy didn’t have any say over him. But the black boy didn’t think of that

right off any more than the nurse did when she ordered Pete removed from the day room. The

black boy walked right up and gave Pete’s arm a jerk [51] toward the door, just like you’d jerk the

reins on a plow horse to turn him.

“Tha’s right, Pete. Less go to the dorm. You disturbin’ ever’body.”

Pete shook his arm loose. “I’m tired,” he warned.

“C’mon, old man, you makin’ a fuss. Less us go to bed and be still like a good boy.”

“Tired ...”

“I said you goin’ to the dorm, old man!”

The black boy jerked at his arm again, and Pete stopped wigwagging his head. He stood up

straight and steady, and his eyes snapped clear. Usually Pete’s eyes are half shut and all murked up,

like there’s milk in them, but this time they came clear as blue neon. And the hand on that arm the

black boy was holding commenced to swell up. The staff and most of the rest of the patients were

talking among themselves, not paying any attention to this old guy and his old song about being

tired, figuring he’d be quieted down as usual and the meeting would go on. They didn’t see the hand

on the end of that arm pumping bigger and bigger as he clenched and unclenched it. I was the only

one saw it. I saw it swell and clench shut, flow in front of my eyes, become smooth—hard. A big

rusty iron ball at the end of a chain. I stared at it and waited, while the black boy gave Pete’s arm

another jerk toward the dorm.

“Ol’ man, I say you got—”

He saw the hand. He tried to edge back away from it, saying, “You a good boy, Peter,” but he

was a shade too late. Pete had that big iron ball swinging all the way from his knees. The black boy

whammed flat against the wall and stuck, then slid down to the floor like the wall there was greased.

I heard tubes pop and short all over inside that wall, and the plaster cracked just the shape of how

he hit.

32

Ken Kesey one flew over the cuckoo’s nest

The other two—the least one and the other big one—stood stunned. The nurse snapped her

fingers, and they sprang into motion. Instant movement, sliding across the floor. The little one

beside the other like an image in a reducing mirror. They were almost to Pete when it suddenly

struck them what the other boy should of known, that Pete wasn’t wired under control like the rest

of us, that he wasn’t about to mind just because they gave him an order or gave his arm a jerk. If

they were to take him they’d have to take him like you take a wild bear or bull, and with one of their

number out cold against the baseboards, the other two black boys didn’t care for the odds.

[52] This thought got them both at once and they froze, the big one and his tiny image, in exactly

the same position, left foot forward, right hand out, halfway between Pete and the Big Nurse. That

iron ball swinging in front of them and that snowwhite anger behind them, they shook and smoked

and I could hear gears grinding. I could see them twitch with confusion, like machines throttled full

ahead and with the brake on.

Pete stood there in the middle of the floor, swinging that ball back and forth at his side, all leaned

over to its weight. Everybody was watching him now. He looked from the big black boy to the little

one, and when he saw they weren’t about to come any closer he turned to the patients.

“You see—it’s a lotta baloney,” he told them, “it’s all a lotta baloney.”

The Big Nurse had slid from her chair and was working toward her wicker bag leaning at the

door. “Yes, yes, Mr. Bancini,” she crooned, “now if you’ll just be calm—”

“That’s all it is, nothin’ but a lotta baloney.” His voice lost its copper strength and became

strained and urgent like he didn’t have much time to finish what he had to say. “Ya see, I can’t help

it, I can’t—don’t ya see. I was born dead. Not you. You wasn’t born dead. Ahhhh, it’s been hard ...”

He started to cry. He couldn’t make the words come out right anymore; he opened and closed his

mouth to talk but he couldn’t sort the words into sentences any more. He shook his head to clear it

and blinked at the Acutes:

“Ahhhh, I ... tell ... ya ... I tell you.”

He began slumping over again, and his iron ball shrank back to a hand. He held it cupped out in

front of him like he was offering something to the patients.

“I can’t help it. I was born a miscarriage. I had so many insults I died. I was born dead. I can’t

help it. I’m tired. I’m give out trying. You got chances. I had so many insults I was born dead. You

got it easy. I was born dead an’ life was hard. I’m tired. I’m tired out talking and standing up. I been

dead fifty-five years.”

The Big Nurse got him clear across the room, right through his greens. She jumped back without

getting the needle pulled out after the shot and it hung there from his pants like a little tail of glass

and steel, old Pete slumping farther and farther forward, not from the shot but from the effort; the

last couple of minutes had worn him out finally and completely, once and for all—you could just

look at him and tell he was finished.

So there wasn’t really any need for the shot; his head had already commenced to wag back and

forth and his eyes were [53] murky. By the time the nurse eased back in to get the needle he was

bent so far forward he was crying directly on the floor without wetting his face, tears spotting a wide

area as he swung his head back and forth, spatting, spatting, in an even pattern on the day-room

floor, like he was sowing them. “Ahhhhh,” he said. He didn’t flinch when she jerked the needle out.

He had come to life for maybe a minute to try to tell us something, something none of us cared

to listen to or tried to understand, and the effort had drained him dry. That shot in his hip was as

wasted as if she’d squirted it in a dead man—no heart to pump it, no vein to carry it up to his head,

no brain up there for it to mortify with its poison. She’d just as well shot it in a dried-out old

cadaver.

“I’m ... tired ...”

“Now. I think if you two boys are brave enough, Mr. Bancini will go to bed like a good fellow.”

33

Ken Kesey one flew over the cuckoo’s nest

“... aw-ful tired.”

“And Aide Williams is coming around, Doctor Spivey. See to him, won’t you. Here. His watch is

broken and he’s cut his arm.”

Pete never tried anything like that again, and he never will. Now, when he starts acting up during

a meeting and they try to hush him, he always hushes. He’ll still get up from time to time and wag

his head and let us know how tired he is, but it’s not a complaint or excuse or warning any more—

he’s finished with that; it’s like an old clock that won’t tell time but won’t stop neither, with the

hands bent out of shape and the face bare of numbers and the alarm bell rusted silent, an old,

worthless clock that just keeps ticking and cuckooing without meaning nothing.

The group is still tearing into poor Harding when two o’clock rolls around.

At two o’clock the doctor begins to squirm around in his chair. The meetings are uncomfortable

for the doctor unless he’s talking about his theory; he’d rather spend his time down in his office,

drawing on graphs. He squirms around and finally clears his tbroat, and the nurse looks at her watch

and tells us to bring the tables back in from the tub room and we’ll resume this discussion again at

one tomorrow. The Acutes click out of their trance, look for an instant in Harding’s direction. Their

faces burn with a shame like they have just woke up to the fact they been played for suckers again.

Some of them go to the tub room across the hall to get the tables, some [54] wander over to the

magazine racks and show a lot of interest in the old McCall’s magazines, but what they’re all really

doing is avoiding Harding. They’ve been maneuvered again into grilling one of their friends like he

was a criminal and they were all prosecutors and judge and jury. For forty-five minutes they been

chopping a man to pieces, almost as if they enjoyed it, shooting questions at him: What’s he think is

the matter with him that he can’t please the little lady; why’s he insist she has never had anything to

do with another man; how’s he expect to get well if he doesn’t answer honestly? —questions and

insinuations till now they feel bad about it and they don’t want to be made more uncomfortable by

being near him.

McMurphy’s eyes follow all of this. He doesn’t get out of his chair. He looks puzzled again. He

sits in his chair for a while, watching the Acutes, scuffing that deck of cards up and down the red

stubble on his chin, then finally stands up from his arm chair, yawns and stretches and scratches his

belly button with a corner of a card, then puts the deck in his pocket and walks over to where

Harding is off by himself, sweated to his chair.

McMurphy looks down at Harding a minute, then laps his big hand over the back of a nearby

wooden chair, swings it around so the back is facing Harding, and straddles it like he’d straddle a

tiny horse. Harding hasn’t noticed a thing. McMurphy slaps his pockets till he finds his cigarettes,

and takes one out and lights it; he holds it out in front of him and frowns at the tip, licks his thumb

and finger, and arranges the fire to suit him.

Each man seems unaware of the other. I can’t even tell if Harding’s noticed McMurphy at all.

Harding’s got his thin shoulders folded nearly together around himself, like green wings, and he’s

sitting very straight near the edge of his chair, with his hands trapped between his knees. He’s staring

straight ahead, humming to himself, trying to look calm—but he’s chewing at his cheeks, and this

gives him a funny skull grin, not calm at all.

McMurphy puts his cigarette back between his teeth and folds his hands over the wooden chair

back and leans his chin on them, squinting one eye against the smoke. He looks at Harding with his

other eye a while, then starts talking with that cigarette wagging up and down in his lips.

“Well say, buddy, is this the way these leetle meetings usually go?”

“Usually go?” Harding’s humming stops. He’s not chewing [55] his cheeks any more but he still

stares ahead, past McMurphy’s shoulder.

34

Ken Kesey one flew over the cuckoo’s nest

“Is this the usual pro-cedure for these Group Ther’py shindigs? Bunch of chickens at a peckin’

party?”

Harding’s head turns with a jerk and his eyes find McMurphy, like it’s the first time he knows that

anybody’s sitting in front of him. His face creases in the middle when he bites his cheeks again, and

this makes it look like he’s grinning. He pulls his shoulders back and scoots to the back of the chair

and tries to look relaxed.

“A ‘pecking party’? I fear your quaint down-home speech is wasted on me, my friend. I have not

the slightest inclination what you’re talking about.”

“Why then, I’ll just explain it to you.” McMurphy raises his voice; though he doesn’t look at the

other Acutes listening behind him, it’s them he’s talking to. “The flock gets sight of a spot of blood

on some chicken and they all go to peckin’ at it, see, till they rip the chicken to shreds, blood and

bones and feathers. But usually a couple of the flock gets spotted in the fracas, then it’s their turn.

And a few more gets spots and gets pecked to death, and more and more. Oh, a peckin’ party can

wipe out the whole flock in a matter of a few hours, buddy, I seen it. A mighty awesome sight. The

only way to prevent it—with chickens—is to clip blinders on them. So’s they can’t see.”

Harding laces his long fingers around a knee and draws the knee toward him, leaning back in the

chair. “A pecking party. That certainly is a pleasant analogy, my friend.”

“And that’s just exactly what that meeting I just set through reminded me of, buddy, if you want

to know the dirty truth. It reminded me of a flock of dirty chickens.”

“So that makes me the chicken with the spot of blood, friend?”

“That’s right, buddy.”

They’re still grinning at each other, but their voices have dropped so low and taut I have to sweep

over closer to them with my broom to hear. The other Acutes are moving up closer too.

“And you want to know somethin’ else, buddy? You want to know who pecks that first peck?”

Harding waits for him to go on.

“It’s that old nurse, that’s who.”

There’s a whine of fear over the silence. I hear the machinery in the walls catch and go on.

Harding is having a tough time holding his hands still, but he keeps trying to act calm.

“So,” he says, “it’s as simple as that, as stupidly simple as [56] that. You’re on our ward six hours

and have already simplified all the work of Freud, Jung, and Maxwell Jones and summed it up in one

analogy: it’s a ‘peckin’ party.’ ”

“I’m not talking about Fred Yoong and Maxwell Jones, buddy, I’m just talking about that

crummy meeting and what that nurse and those other bastards did to you. Did in spades.”

“Did to me?”

“That’s right, did. Did you every chance they got. Did you coming and did you going. You must

of done something to makes a passle of enemies here in this place, buddy, because it seems there’s

sure a passle got it in for you.”

“Why, this is incredible. You completely disregard, completely overlook and disregard the fact

that what the fellows were doing today was for my own benefit? That any question or discussion

raised by Miss Ratched or the rest of the staff is done solely for therapeutic reasons? You must not

have heard a word of Doctor Spivey’s theory of the Therapeutic Community, or not have had the

education to comprehend it if you did. I’m disappointed in you, my friend, oh, very disappointed. I

had judged from our encounter this morning that you were more intelligent—an illiterate clod,

perhaps, certainly a backwoods braggart with no more sensitivity than a goose, but basically

intelligent nevertheless. But, observant and insightful though I usually am, I still make mistakes.”

“The hell with you, buddy.”

“Oh, yes; I forgot to add that I noticed your primitive brutality also this morning. Psychopath

with definite sadistic tendencies, probably motivated by an unreasoning egomania. Yes. As you see,

35

Ken Kesey one flew over the cuckoo’s nest

all these natural talents certainly qualify you as a competent therapist and render you quite capable of

criticizing Miss Ratched’s meeting procedure, in spite of the fact that she is a highly regarded

psychiatric nurse with twenty years in the field. Yes, with your talent, my friend, you could work

subconscious miracles, soothe the aching id and heal the wounded superego. You could probably

bring about a cure for the whole ward, Vegetables and all, in six short months, ladies and gentlemen

or your money back.”

Instead of rising to the argument, McMurphy just keeps on looking at Harding, finally asks in a

level voice, “And you really think this crap that went on in the meeting today is bringing about some

kinda cure, doing some kinda good?”

“What other reason would we have for submitting ourselves to it, my friend? The staff desires

our cure as much as we do. They aren’t monsters. Miss Ratched may be a strict middle-aged lady,

but she’s not some kind of giant monster of [57] the poultry clan, bent on sadistically pecking out

our eyes. You can’t believe that of her, can you?”

“No, buddy, not that. She ain’t peckin’ at your eyes. That’s not what she’s peckin’ at.”

Harding flinches, and I see his hands begin to creep out from between his knees like white

spiders from between two moss-covered tree limbs, up the limbs toward the joining at the trunk.

“Not our eyes?” he says. “Pray, then, where is Miss Ratched pecking, my friend?”

McMurphy grinned. “Why, don’t you know, buddy?”

“No, of course I don’t know! I mean, if you insi—”

“At your balls, buddy, at your everlovin’ balls.”

The spiders reach the joining at the trunk and settle there, twitching. Harding tries to grin, but his

face and lips are so white the grin is lost. He stares at McMurphy. McMurphy takes the cigarette out

of his mouth and repeats what he said.

“Right at your balls. No, that nurse ain’t some kinda monster chicken, buddy, what she is is a

ball-cutter. I’ve seen a thousand of ‘em, old and young, men and women. Seen ‘em all over the

country and in the homes—people who try to make you weak so they can get you to toe the line, to

follow their rules, to live like they want you to. And the best way to do this, to get you to knuckle

under, is to weaken you by gettin’ you where it hurts the worst. You ever been kneed in the nuts in a

brawl, buddy? Stops you cold, don’t it? There’s nothing worse. It makes you sick, it saps every bit of

strength you got. If you’re up against a guy who wants to win by making you weaker instead of

making himself stronger, then watch for his knee, he’s gonna go for your vitals. And that’s what that

old buzzard is doing, going for your vitals.”

Harding’s face is still colorless, but he’s got control of his hands again; they flip loosely before

him, trying to toss off what McMurphy has been saying:

“Our dear Miss Ratched? Our sweet, smiling, tender angel of mercy, Mother Ratched, a ballcutter? Why, friend, that’s most unlikely.”

“Buddy, don’t give me that tender little mother crap. She may be a mother, but she’s big as a

damn barn and tough as knife metal. She fooled me with that kindly little old mother bit for maybe

three minutes when I came in this morning, but no longer. I don’t think she’s really fooled any of

you guys for any six months or a year, neither. Hooo wee, I’ve seen some bitches in my time, but she

takes the cake.”

“A bitch? But a moment ago she was a ball-cutter, then a [58] buzzard—or was it a chicken?

Your metaphors are bumping into each other, my friend.”

“The hell with that; she’s a bitch and a buzzard and a ball-cutter, and don’t kid me, you know

what I’m talking about.”

Harding’s face and hands are moving faster than ever now, a speeded film of gestures, grins,

grimaces, sneers. The more he tries to stop it, the faster it goes. When he lets his hands and face

move like they want to and doesn’t try to hold them back, they flow and gesture in a way that’s real

36

Ken Kesey one flew over the cuckoo’s nest

pretty to watch, but when he worries about them and tries to hold back he becomes a wild, jerky

puppet doing a high-strung dance. Everything is moving faster and faster, and his voice is speeding

up to match.

“Why, see here, my friend Mr. McMurphy, my psychopathic sidekick, our Miss Ratched is a

veritable angel of mercy and why just everyone knows it. She’s unselfish as the wind, toiling thanklessly

for the good of all, day after day, five long days a week. That takes heart, my friend, heart. In fact, I

have been informed by sources—I am not at liberty to disclose my sources, but I might say that

Martini is in contact with the same people a good part of the time—that she even further serves

mankind on her weekends off by doing generous volunteer work about town. Preparing a rich array

of charity—canned goods, cheese for the binding effect, soap—and presenting it to some poor

young couple having a difficult time financially.” His hands flash in the air, molding the picture he is

describing. “Ah, look: There she is, our nurse. Her gentle knock on the door. The ribboned basket.

The young couple overjoyed to the point of speechlessness. The husband open-mouthed, the wife

weeping openly. She appraises their dwelling. Promises to send them money for—scouring powder,

yes. She places the basket in the center of the floor. And when our angel leaves—throwing kisses,

smiling ethereally—she is so intoxicated with the sweet milk of human kindness that her deed has

generated within her large bosom, that she is beside herself with generosity. Be- side herself, do you

hear? Pausing at the door, she draws the timid young bride to one side and offers her twenty dollars

of her own: ‘Go, you poor unfortunate underfed child, go, and buy yourself a decent dress. I realize

your husband can’t afford it, but here, take this, and go.’ And the couple is forever indebted to her

benevolence.”

He’s been talking faster and faster, the cords stretching out in his neck. When he stops talking,

the ward is completely silent. I don’t hear anything but a faint reeling rhythm, what I figure is a tape

recorder somewhere getting all of this.

[59] Harding looks around, sees everybody’s watching him, and he does his best to laugh. A

sound comes out of his mouth like a nail being crowbarred out of a plank of green pine; Eee-eeeeee. He can’t stop it. He wrings his hands like a fly and clinches his eyes at the awful sound of that

squeaking. But he can’t stop it. It gets higher and higher until finally, with a suck of breath, he lets

his face fall into his waiting hands.

“Oh the bitch, the bitch, the bitch,” he whispers through his teeth.

McMurphy lights another cigarette and offers it to him; Harding takes it without a word.

McMurphy is still watching Harding’s face in front of him there, with a kind of puzzled wonder,

looking at it like it’s the first human face he ever laid eyes on. He watches while Harding’s twitching

and jerking slows down and the face comes up from the hands.

“You are right,” Harding says, “about all of it.” He looks up at the other patients who are

watching him. “No one’s ever dared come out and say it before, but there’s not a man among us

that doesn’t think it, that doesn’t feel just as you do about her and the whole business—feel it

somewhere down deep in his scared little soul.”

McMurphy frowns and asks, “What about that little fart of a doctor? He might be a little slow in

the head, but not so much as not to be able to see how she’s taken over and what she’s doing.”

Harding takes a long pull off the cigarette and lets the smoke drift out with his talk. “Doctor

Spivey … is exactly like the rest of us, McMurphy, completely conscious of his inadequacy. He’s a

frightened, desperate, ineffectual little rabbit, totally incapable of running this ward without our Miss

Ratched’s help, and he knows it. And, worse, she knows he knows it and reminds him every chance

she gets. Every time she finds he’s made a little slip in the bookwork or in, say, the charting you can

just imagine her in there grinding his nose in it.”

“That’s right,” Cheswick says, coming up beside McMurphy, “grinds our noses in our mistakes.”

“Why don’t he fire her?”

37

Ken Kesey one flew over the cuckoo’s nest

“In this hospital,” Harding says, “the doctor doesn’t hold the power of hiring and firing. That

power goes to the supervisor, and the supervisor is a woman, a dear old friend of Miss Ratched’s;

they were Army nurses together in the thirties. We are victims of a matriarchy here, my friend, and

the doctor is just as helpless against it as we are. He knows that all Ratched has to do is pick up that

phone you see sitting [60] at her elbow and call the supervisor and mention, oh, say, that the doctor

seems to be making a great number of requisitions for Demerol—”

“Hold it, Harding, I’m not up on all this shop talk.”

“Demerol, my friend, is a synthetic opiate, twice as addictive as heroin. Quite common for

doctors to be addicted to it.”

“That little fart? Is he a dope addict?”

“I’m certain I don’t know.”

“Then where does she get off with accusing him of—”

“Oh, you’re not paying attention, my friend. She doesn’t accuse. She merely needs to insinuate,

insinuate anything, don’t you see? Didn’t you notice today? She’ll call a man to the door of the

Nurses’ Station and stand there and ask him about a Kleenex found under his bed. No more, just

ask. And he’ll feel like he’s lying to her, whatever answer he gives. If he says he was cleaning a pen

with it, she’ll say, ‘I see, a pen,’ or if he says he has a cold in his nose, she’ll say, ‘I see, a cold,’ and

she’ll nod her neat little gray coiffure and smile her neat little smile and turn and go back into the

Nurses’ Station, leave him standing there wondering just what did he use that Kleenex for.”

He starts to tremble again, and his shoulders fold back around him.

“No. She doesn’t need to accuse. She has a genius for insinuation. Did you ever hear her, in the

course of our discussion today, ever once hear her accuse me of anything? Yet it seems I have been

accused of a multitude of things, of jealousy and paranoia, of not being man enough to satisfy my

wife, of having relations with male friends of mine, of holding my cigarette in an affected manner,

even—it seems to me—accused of having nothing between my legs but a patch of hair—and soft

and downy and blond hair at that! Ball-cutter? Oh, you underestimate her!”

Harding hushes all of a sudden and leans forward to take McMurphy’s hand in both of his. His

face is tilted oddly, edged, jagged purple and gray, a busted wine bottle.

“This world ... belongs to the strong, my friend! The ritual of our existence is based on the strong

getting stronger by devouring the weak. We must face up to this. No more than right that it should

be this way. We must learn to accept it as a law of the natural world. The rabbits accept their role in

the ritual and recognize the wolf as the strong. In defense, the rabbit becomes sly and frightened and

elusive and he digs holes and hides when the wolf is about. And he endures, he goes on. He knows

his place. He most certainly doesn’t [61] challenge the wolf to combat. Now, would that be wise?

Would it?”

He lets go McMurphy’s hand and leans back and crosses his legs, takes another long pull off the

cigarette. He pulls the cigarette from his thin crack of a smile, and the laugh starts up again—eeeeee-eee, like a nail coming out of a plank.

“Mr. McMurphy ... my friend ... I’m not a chicken, I’m a rabbit. The doctor is a rabbit. Cheswick

there is a rabbit. Billy Bibbit is a rabbit. All of us in here are rabbits of varying ages and degrees,

hippity-hopping through our Walt Disney world. Oh, don’t misunderstand me, we’re not in here

because we are rabbits—we’d be rabbits wherever we were—we’re all in here because we can’t adjust

to our rabbithood. We need a good strong wolf like the nurse to teach us our place.”

“Man, you’re talkin’ like a fool. You mean to tell me that you’re gonna sit back and let some old

blue-haired woman talk you into being a rabbit?”

“Not talk me into it, no. I was born a rabbit. Just look at me. I simply need the nurse to make me

happy with my role.”

“You’re no damned rabbit!”

38

Ken Kesey one flew over the cuckoo’s nest

“See the ears? the wiggly nose? the cute little button tail?”

“You’re talking like a crazy ma—”

“Like a crazy man? How astute.”

“Damn it, Harding, I didn’t mean it like that. You ain’t crazy that way. I mean—hell, I been

surprised how sane you guys all are. As near as I can tell you’re not any crazier than the average

asshole on the street—”

“Ah yes, the asshole on the street.”

“But not, you know, crazy like the movies paint crazy people. You’re just hung up and—kind

of—”

“Kind of rabbit-like, isn’t that it?”

“Rabbits, hell! Not a thing like rabbits, goddammit.”

“Mr. Bibbit, hop around for Mr. McMurphy here. Mr. Cheswick, show him how furry, you are.”

Billy Bibbit and Cheswick change into hunched-over white rabbits, right before my eyes, but they

are too ashamed to do any of the things Harding told them to do.

“Ah, they’re bashful, McMurphy. Isn’t that sweet? Or, perhaps, the fellows are ill at ease because

they didn’t stick up for their friend. Perhaps they are feeling guilty for the way they once again let

her victimize them into being her interrogators. Cheer up, friends, you’ve no reason to feel ashamed.

It is all as it should be. It’s not the rabbit’s place to stick up for his fellow. That would have been

foolish. No, you were wise, cowardly but wise.”

[62] “Look here, Harding,” Cheswick says.

“No, no, Cheswick. Don’t get irate at the truth.”

“Now look here; there’s been times when I’ve said the same things about old lady Ratched that

McMurphy has been saying.”

“Yes, but you said them very quietly and took them all back later. You are a rabbit too, don’t try

to avoid the truth. That’s why I hold no grudge against you for the questions you asked me during

the meeting today. You were only playing your role. If you had been on the carpet, or you Billy, or

you Fredrickson, I would have attacked you just as cruelly as you attacked me. We mustn’t be

ashamed of our behavior; it’s the way we little animals were meant to behave.”

McMurphy turns in his chair and looks the other Acutes up and down. “I ain’t so sure but what

they should be ashamed. Personally, I thought it was damned crummy the way they swung in on her

side against you. For a minute there I thought I was back in a Red Chinese prison camp ...”

“Now by God, McMurphy,” Cheswick says, “you listen here.”

McMurphy turns and listens, but Cheswick doesn’t go on. Cheswick never goes on; he’s one of

these guys who’ll make a big fuss like he’s going to lead an attack, holler charge and stomp up and

down a minute, take a couple steps, and quit. McMurphy looks at him where he’s been caught off

base again after such a tough-sounding start, and says to him, “A hell of a lot like a Chinese prison

camp.”

Harding holds up his hands for peace. “Oh, no, no, that isn’t right. You mustn’t condemn us, my

friend. No. In fact …”

I see that sly fever come into Harding’s eye again; I think he’s going to start laughing, but instead

he takes his cigarette out of his mouth and points it at McMurphy—in his hand it looks like one of

his thin, white fingers, smoking at the end.

“… you too, Mr. McMurphy, for all your cowboy bluster and your sideshow swagger, you too,

under that crusty surface, are probably just as soft and fuzzy and rabbit-souled as we are.”

“Yeah, you bet. I’m a little cottontail. Just what is it makes me a rabbit, Harding? My

psychopathic tendencies? Is it my fightin’ tendencies, or my fuckin’ tendencies? Must be the fuckin’,

mustn’t it? All that whambam-thank-you-ma’am. Yeah, that whambam, that’s probably what makes

me a rabbit—”

39

Ken Kesey one flew over the cuckoo’s nest

“Wait; I’m afraid you’ve raised a point that requires some deliberation. Rabbits are noted for that

certain trait, aren’t they? Notorious, in fact, for their whambam. Yes. Um. But [63] in any case, the.

point you bring up simply indicates that you are a healthy, functioning and adequate rabbit, whereas

most of us in here even lack the sexual ability to make the grade as adequate rabbits. Failures, we

are—feeble, stunted, weak little creatures in a weak little race. Rabbits, sans whambam; a pathetic

notion.”

“Wait a minute; you keep twistin’ what I say—”

“No. You were right. You remember, it was you that drew our attention to the place where the

nurse was concentrating her pecking? That was true. There’s not a man here that isn’t afraid he is

losing or has already lost his whambam. We comical little creatures can’t even achieve masculinity in

the rabbit world, that’s how weak and inadequate we are. Hee. We are—the rabbits, one might say, of

the rabbit world!”

He leans forward again, and that strained, squeaking laugh of his that I been expecting begins to

rise from his mouth, his hands flipping around, his lace twitching.

“Harding! Shut your damned mouth!”

It’s like a slap. Harding is hushed, chopped off cold with his mouth still open in a drawn grin, his

hands dangling in a cloud of blue tobacco smoke. He freezes this way a second; then his eyes narrow

into sly little holes and he lets them slip over to McMurphy, speaks so soft that I have to push my

broom up right next to his chair to hear what he says.

“Friend ... you ... may be a wolf.”

“Goddammit, I’m no wolf and you’re no rabbit. Hoo, I never heard such—”

“You have a very wolfy roar.”

With a loud hissing o: breath McMurphy turns from Harding to the rest of the Acutes standing

around. “Here; all you guys. What the hell is the matter with you? You ain’t as crazy as all this,

thinking you’re some animal.”

“No,” Cheswick says and steps in beside McMurphy. “No, by God, not me. I’m not any rabbit.”

“That’s the boy, Cheswick. And the rest of you, let’s just knock it off. Look at you, talking

yourself into running scared from some fifty-year-old woman. What is there she can do to you,

anyway?”

“Yeah, what?” Cheswick says and glares around at the others.

“She can’t have you whipped. She can’t burn you with hot irons. She can’t tie you to the rack.

They got laws about that sort of thing nowadays; this ain’t the Middle Ages. There’s not a thing in

the world that she can—”

“You s-s- saw what she c-can do to us! In the m-m-meeting [64] today.” I see Billy Bibbit has

changed back from a rabbit. He leans toward McMurphy, trying to go on, his mouth wet with spit

and his face red. Then he turns and walks away. “Ah, it’s n-no use. I should just k-k-kill myself.”

McMurphy calls after him. “Today? What did I see in the meeting today? Hell’s bells, all I saw

today was her asking a couple of questions, and nice, easy questions at that. Questions ain’t

bonebreakers, they ain’t sticks and stones.”

Billy turns back. “But the wuh-wuh- way she asks them—”

“You don’t have to answer, do you?”

“If you d-don’t answer she just smiles and m-m-makes a note in her little book and then she—

she—oh, hell!”

Scanlon comes up beside Billy. “If you don’t answer her questions, Mack, you admit it just by

keeping quiet. It’s the way those bastards in the government get you. You can’t beat it. The only

thing to do is blow the whole business off the face of the whole bleeding earth—blow it all up.”

“Well, when she asks one of those questions, why don’t you tell her to up and go to hell?”

“Yeah,” Cheswick says, shaking his fist, “tell her to up and go to hell.”

40

Ken Kesey one flew over the cuckoo’s nest

“So then what, Mack? She’d just come right back with ‘Why do you seem so upset by that par-tikuler question, Patient McMurphy?’ ”

“So, you tell her to go to hell again. Tell them all to go to hell. They still haven’t hurt you.”

The Acutes are crowding closer around him. Fredrickson answers this time. “Okay, you tell her

that and you’re listed as Potential Assaultive and shipped upstairs to the Disturbed ward. I had it

happen. Three times. Those poor goofs up there don’t even get off the ward to go to the Saturday

afternoon movie. They don’t even have a TV.”

“And, my friend, if you continue to demonstrate such hostile tendencies, such as telling people to

go to hell, you get lined up to go to the Shock Shop, perhaps even on to greater things, an operation,

an—”

“Damn it, Harding, I told you I’m not up on this talk.”

“The Shock Shop, Mr. McMurphy, is jargon for the EST machine, the Electro Shock Therapy. A

device that might be said to do the work of the sleeping pill, the electric chair, and the torture rack.

It’s a clever little procedure, simple, quick, nearly painless it happens so fast, but no one ever wants

another one. Ever.”

“What’s this thing do?”

“You are strapped to a table, shaped, ironically, like a cross, [65] with a crown of electric sparks in

place of thorns. You are touched on each side of the head with wires. Zap! Five cents’ worth of

electricity through the brain and you are jointly administered therapy and a punishment for your

hostile go-to-hell behavior, on top of being put out of everyone’s way for six hours to three days,

depending on the individual. Even when you do regain consciousness you are in a state of

disorientation for days. You are unable to think coherently. You can’t recall things. Enough of these

treatments and a man could turn out like Mr. Ellis you see over there against the wall. A drooling,

pants-wetting idiot at thirty-five. Or turn into a mindless organism that eats and eliminates and yells

‘fuck the wife,’ like Ruckly. Or look at Chief Broom clutching to his namesake there beside you.”

Harding points his cigarette at me, too late for me to back off. I make like I don’t notice. Go on

with my sweeping.

“I’ve heard that the Chief, years ago, received more than two hundred shock treatments when

they were really the vogue. Imagine what this could do to a mind that was already slipping. Look at

him: a giant janitor. There’s your Vanishing American, a six-foot-eight sweeping machine, scared of

its own shadow. That, my friend, is what we can be threatened with.”

McMurphy looks at me a while, then turns back to Harding. “Man, I tell you, how come you

stand for it? What about this democratic-ward manure that the doctor was giving me? Why don’t

you take a vote?”

Harding smiles at him and takes another slow drag on his cigarette. “Vote what, my friend? Vote

that the nurse may not ask any more questions in Group Meeting? Vote that she shall not look at us

in a certain way? You tell me, Mr. McMurphy, what do we vote on?”

“Hell, I don’t care. Vote on anything. Don’t you see you have to do something to show you still

got some guts? Don’t you see you can’t let her take over completely? Look at you here: you say the

Chief is scared of his own shadow, but I never saw a scareder-looking bunch in my life than you

guys.”

“Not me!” Cheswick says.

“Maybe not you, buddy, but the rest are even scared to open up and laugh. You know, that’s the

first thing that got me about this place, that there wasn’t anybody laughing. I haven’t heard a real

laugh since I came through that door, do you know that? Man, when you lose your laugh you lose

your footing. A man go around lettin’ a woman whup him down till he can’t laugh any more, and he

loses one of the biggest edges he’s [66] got on his side. First thing you know he’ll begin to think

she’s tougher than he is and—”

41

Ken Kesey one flew over the cuckoo’s nest

“Ah. I believe my friend is catching on, fellow rabbits. Tell me, Mr. McMurphy, bow does one go

about showing a woman who’s boss, I mean other than laughing at her? How does he show her

who’s king of the mountain? A man like you should be able to tell us that. You don’t slap her

around, do you? No, then she calls the law. You don’t lose your temper and shout at her; she’ll win

by trying to placate her big ol’ angry boy: ‘Is us wittle man getting fussy? Ahhhhh?’ Have you ever

tried to keep up a noble and angry front in the face of such consolation? So you see, my friend, it is

somewhat as you stated: man has but one truly effective weapon against the juggernaut of modern

matriarchy, but it certainly is not laughter. One weapon, and with every passing year in this hip,

motivationally researched society, more and more people are discovering how to render that weapon

useless and conquer those who have hitherto been the conquerors—”

“Lord, Harding, but you do come on,” McMurphy says.

“—and do you think, for all your acclaimed psychopathic powers, that you could effectively use

your weapon against our champion? Do you think you could use it against Miss Ratched,

McMurphy? Ever?”

And sweeps one of his hands toward the glass case. Everybody’s head turns to look. She’s in

there, looking out through her window, got a tape recorder hid out of sight somewhere, getting all

this down—already planning how to work it into the schedule.

The nurse sees everybody looking at her and she nods and they all turn away. McMurphy takes

off his cap and runs his hands into that red hair. Now everybody is looking at him; they’re waiting

for him to make an answer and he knows it. He feels he’s been trapped some way. He puts the cap

back on and rubs the stitch marks on his nose.

“Why, if you mean do I think I could get a bone up over that old buzzard, no, I don’t believe I

could. ...”

“She’s not all that homely, McMurphy. Her face is quite handsome and well preserved. And in

spite of all her attempts to conceal them, in that sexless get-up, you can still make out the evidence of

some rather extraordinary breasts. She must have been a rather beautiful young woman. Still—for

the sake of argument, could you get it up over her even if she wasn’t old, even if she was young and

had the beauty of Helen?”

“I don’t know Helen, but I see what you’re drivin’ at. And [67] you’re by God right. I couldn’t get

it up over old frozen face in there even if she had the beauty of Marilyn Monroe.”

“There you are. She’s won.”

That’s it. Harding leans back and everybody waits for what McMurphy’s going to say next.

McMurphy can see he’s backed up against the wall. He looks at the faces a minute, then shrugs and

stands up from his chair.

“Well, what the hell, it’s no skin off my nose.”

“That’s true, it’s no skin off your nose.”

“And I damn well don’t want to have some old fiend of a nurse after me with three thousand

volts. Not when there’s nothing in it for me but the adventure.”

“No. You’re right.”

Harding’s won the argument, but nobody looks too happy. McMurphy hooks his thumbs in his

pockets and tries a laugh.

“No sir, I never heard of anybody offering a twenty-bone bounty for bagging a ball-cutter.”

Everybody grins at this with him, but they’re not happy. I’m glad McMurphy is going to be cagey

after all and not get sucked in on something he can’t whip, but I know how the guys feel; I’m not so

happy myself. McMurphy lights another cigarette. Nobody’s moved yet. They’re all still standing

there, grinning and uncomfortable. McMurphy rubs his nose again and looks away from the bunch

of faces hung out there around him, looks back at the nurse and chews his lip.

42

Ken Kesey one flew over the cuckoo’s nest

“But you say ... she don’t send you up to that other ward unless she gets your goat? Unless she

makes you crack in some way and you end up cussing her out or busting a window or something like

that?”

“Unless you do something like that.”

“You’re sure of that, now? Because I’m getting just the shadiest notion of how to pick up a good

purse off you birds in here. But I don’t want to be a sucker about it. I had a hell of a time getting

outa that other hole; I don’t want to be jumping outa the fryin’ pan into the fire.”

“Absolutely certain. She’s powerless unless you do something to honestly deserve the Disturbed

Ward or EST. If you’re tough enough to keep her from getting to you, she can’t do a thing.”

“So if I behave myself and don’t cuss her out—”

“Or cuss one of the aides out.”

“—or cuss one of the aides out or tear up jack some way around here, she can’t do nothing to

me?”

“Those are the rules we play by. Of course, she always wins, my friend, always. She’s impregnable

herself, and with the [68] element of time working for her she eventually gets inside everyone. That’s

why the hospital regards her as its top nurse and grants her so much authority; she’s a master at

forcing the trembling libido out into the open—”

“The hell with that. What I want to know is am I safe to try to beat her at her own game? If I

come on nice as pie to her, whatever else I in- sinuate, she ain’t gonna get in a tizzy and have me

electrocuted?”

“You’re safe as long as you keep control. As long as you don’t lose your temper and give her

actual reason to request the restriction of the Disturbed Ward, or the therapeutic benefits of Electro

Shock, you are safe. But that entails first and foremost keeping one’s temper. And you? With your

red hair and black record? Why delude yourself?”

“Okay. All right.” McMurphy rubs his palms together. “Here’s what I’m thinkin’. You birds seem

to think you got quite the champ in there, don’t you? Quite the—what did you call her?—sure,

impregnable woman. What I want to know is how many of you are dead sure enough to put a little

money on her?”

“Dead sure enough ...?”

“Just what I said: any of you sharpies here willing to take my five bucks that says that I can get

the best of that woman—before the week’s up—without her getting the best of me? One week, and

if I don’t have her to where she don’t know whether to shit or go blind, the bet is yours.”

“You’re betting on this?” Cheswick is hopping from foot to foot and rubbing his hands together

like McMurphy rubs his. “You’re damned right.”

Harding and some of the others say that they don’t get it.

“It’s simple enough. There ain’t nothing noble or complicated about it. I like to gamble. And I

like to win. And I think I can win this gamble, okay? It got so at Pendleton the guys wouldn’t even

lag pennies with me on account of I was such a winner. Why, one of the big reasons I got myself

sent here was because I needed some new suckers. I’ll tell you something: I found out a few things

about this place before I came out here. Damn near half of you guys in here pull compensation,

three, four hundred a month and not a thing in the world to do with it but let it draw dust. I thought

I might take advantage of this and maybe make both our lives a little more richer. I’m starting level

with you. I’m a gambler and I’m not in the habit of losing. And I’ve never seen a woman I thought

was more man than me, I don’t care whether I can get it up [69] for her or not. She may have the

element of time, but I got a pretty long winning streak goin’ myself.”

He pulls off his cap, spins it on his finger, and catches it behind his back in his other band, neat

as you please.

43

Ken Kesey one flew over the cuckoo’s nest

“Another thing: I’m in this place because that’s the way I planned it, pure and simple, because it’s

a better place than a work farm. As near as I can tell I’m no loony, or never knew it if I was. Your

nurse don’t know this; she’s not going to be looking out for somebody coming at her with a triggerquick mind like I obviously got. These things give me an edge I like. So I’m saying five bucks to each

of you that wants it if I can’t put a betsy bug up that nurse’s butt within a week.”

“I’m still not sure I—”

“Just that. A bee in her butt, a burr in her bloomers. Get her goat. Bug her till she comes apart at

those neat little seams, and shows, just one time, she ain’t so unbeatable as you think. One week. I’ll

let you be the judge whether I win or not.”

Harding takes out a pencil and writes something on the pinochle pad.

“Here. A lien on ten dollars of that money they’ve got drawing dust under my name over in

Funds. It’s worth twice that to me, my friend, to see this unlikely miracle brought off.”

McMurphy looks at the paper and folds it. “Worth it to any of the rest of you birds?” Other

Acutes line up now, taking turns at the pad. He takes the pieces of paper when they’re finished,

stacking them on his palm, pinned under a big stiff thumb. I see the pieces of paper crowd up in his

hand. He looks them over.

“You trust me to hold the bets, buddies?”

“I believe we can be safe in doing that,” Harding says. “You won’t be going any place for a

while.”

44

Ken Kesey one flew over the cuckoo’s nest

6

One Christmas at midnight on the button, at the old place, the ward door blows open with a

crash, in comes a fat man with a beard, eyes ringed red by the cold and his nose just the color of a

cherry. The black boys get him cornered in the hall with flashlights. I see he’s all tangled in the tinsel

Public Relation has been stringing all over the place, and he’s stumbling around in it in the dark.

He’s shading his red eyes from the flashlights and sucking on his mustache.

“Ho ho ho,” he says. “I’d like to stay but I must be hurrying along. Very tight schedule, ya know.

Ho ho. Must be going ...”

The black boys move in with the flashlights. They kept him with us six years before they

discharged him, clean-shaven and skinny as a pole.

The Big Nurse is able to set the wall clock at whatever speed she wants by just turning one of

those dials in the steel door; she takes a notion to hurry things up, she turns the speed up, and those

hands whip around that disk like spokes in a wheel. The scene in the picture-screen windows goes

through rapid changes of light to show morning, noon, and night—throb off and on furiously with

day and dark, and everybody is driven like mad to keep up with that passing of fake time; awful

scramble of shaves and breakfasts and appointments and lunches and medications and ten minutes

of night so you barely get your eyes closed before the dorm light’s screaming at you to get up and

start the scramble again, go like a sonofabitch this way, going through the full schedule of a day

maybe twenty times an hour, till the Big Nurse sees everybody is right up to the breaking point, and

she slacks off on the throttle, eases off the pace on that clock-dial, like some kid been fooling with

the moving-picture projection machine and finally got tired watching the film run at ten times its

natural speed, got bored with all that silly scampering and insect squeak of talk and turned it back to

normal.

She’s given to turning up the speed this way on days like, [71] say, when you got somebody to

visit you or when the VFW brings down a smoker show from Portland—times like that, times you’d

like to hold and have stretch out. That’s when she speeds things up.

But generally it’s the other way, the slow way. She’ll turn that dial to a dead stop and freeze the

sun there on the screen so it don’t move a scant hair for weeks, so not a leaf on a tree or a blade of

grass in the pasture shimmers. The clock hands hang at two minutes to three and she’s liable to let

them hang there till we rust. You sit solid and you can’t budge, you can’t walk or move to relieve the

strain of sitting, you can’t swallow and you can’t breathe. The only thing you can move is your eyes

and there’s nothing to see but petrified Acutes across the room waiting on one another to decide

whose play it is. The old Chronic next to me has been dead six days, and he’s rotting to the chair.

And instead of fog sometimes she’ll let a clear chemical gas in through the vents, and the whole

ward is set solid when the gas changes into plastic.

Lord knows how long we hang this way.

Then, gradually, she’ll ease the dial up a degree, and that’s worse yet. I can take hanging dead still

better’n I can take that sirup-slow hand of Scanlon across the room, taking three days to lay down a

card. My lungs pull for the thick plastic air like getting it through a pinhole. I try to go to the latrine

and I feel buried under a ton of sand, squeezing my bladder till green sparks flash and buzz across

my forehead.

I strain with every muscle and bone to get out of that chair and go to the latrine, work to get up

till my arms and legs are all ashake and my teeth hurt. I pull and pull and all I gain is maybe a

quarter-inch off the leather seat. So I fall back and give up and let the pee pour out, activating a hot

salt wire down my left leg that sets off humiliating alarms, sirens, spotlights, everybody up yelling

45

Ken Kesey one flew over the cuckoo’s nest

and running around and the big black boys knocking the crowd aside right and left as the both of

them rush headlong at me, waving awful mops of wet copper wires cracking and spitting as they

short with the water.

About the only time we get any let-up from this time control is in the fog; then time doesn’t

mean anything. It’s lost in the fog, like everything else. (They haven’t really fogged the place full

force all day today, not since McMurphy came in. I bet he’d yell like a bull if they fogged it.)

When nothing else is going on, you usually got the fog or the time control to contend with, but

today something’s happened: there hasn’t been any of these things worked on us all [72] day, not

since shaving. This afternoon everything is matching up. When the swing shift comes on duty the

clock says four-thirty, just like it should. The Big Nurse dismisses the black boys and takes a last

look around the ward. She slides a long silver hatpin out of the iron-blue knot of hair back of her

head, takes off her white cap and sets it careful in a cardboard box (there’s mothballs in that box),

and drives the hatpin back in the hair with a stab of her hand.

Behind the glass I see her tell everyone good evening. She hands the little birthmarked swingshift nurse a note; then her hand reaches out to the control panel in the steel door, clacks on the

speaker in the day room: “Good evening, boys. Behave yourselves.” And turns the music up louder

than ever. She rubs the inside of her wrist across her window; a disgusted look shows the fat black

boy who just reported on duty that he better get to cleaning it, and he’s at the glass with a paper

towel before she’s so much as locked the ward door behind her.

The machinery in the walls whistles, sighs, drops into a lower gear.

Then, till night, we eat and shower and go back to sit in the day room. Old Blastic, the oldest

Vegetable, is holding his stomach and moaning. George (the black boys call him Ruba-dub) is

washing his hands in the drinking fountain. The Acutes sit and play cards and work at getting a

picture on our TV set by carrying the set every place the cord will reach, in search of a good beam.

The speakers in the ceiling are still making music. The music from the speakers isn’t transmitted

in on a radio beam is why the machinery don’t interfere. The music comes off a long tape from the

Nurses’ Station, a tape we all know so well by heart that there don’t any of us consciously hear it

except new men like McMurphy. He hasn’t got used to it yet. He’s dealing blackjack for cigarettes,

and the speaker’s right over the card table. He’s pulled his cap way forward till he has to lean his

head back and squint from under the brim to see his cards. He holds a cigarette between his teeth

and talks around it like a stock auctioneer I saw once in a cattle auction in The Dalles.

“... hey-ya, hey-ya, come on, come on,” he says, high, fast; “I’m waitin’ on you suckers, you hit or

you sit. Hit, you say? well well well and with a king up the boy wants a hit. Whaddaya know. So

Comin’ at you and too bad, a little lady for the lad and he’s over the wall and down the road, up the

hill and dropped his load. Comin’ at you, Scanlon, and I wish some [73] idiot in that nurses’ hothouse would

turn down that frigging music! Hooee! Does that thing play night and day, Harding? I never heard such a

driving racket in my life.”

Harding gives him a blank look. “Exactly what noise is it you’re referring to, Mr. McMurphy?”

“That damned radio. Boy. It’s been going ever since I come in this morning. And don’t come on

with some baloney that you don’t hear it.”

Harding cocks his ear to the ceiling. “Oh, yes, the so-called music. Yes, I suppose we do hear it if

we concentrate, but then one can hear one’s own heartbeat too, if he concentrates hard enough.” He

grins at McMurphy. “You see, that’s a recording playing up there, my friend. We seldom hear the

radio. The world news might not be therapeutic. And we’ve all heard that recording so many times

now it simply slides out of our hearing, the way the sound of a waterfall soon becomes an unheard

sound to those who live near it. Do you think if you lived near a waterfall you could hear it very

long?”

46

Ken Kesey one flew over the cuckoo’s nest

(I still hear the sound of the falls on the Columbia, always will—always—hear the whoop of

Charley Bear Belly stabbed himself a big chinook, hear the slap of fish in the water, laughing naked

kids on the bank, the women at the racks ... from a long time ago.)

“Do they leave it on all the time, like a waterfall?” McMurphy says.

“Not when we sleep,” Cheswick says, “but all the rest of the time, and that’s the truth.”

“The hell with that. I’ll tell that coon over there to turn it off or get his fat little ass kicked!”

He starts to stand up, and Harding touches his arm. “Friend, that is exactly the kind of statement

that gets one branded assaultive. Are you so eager to forfeit the bet?”

McMurphy looks at him. “That’s the way it is, huh? A pressure game? Keep the old pinch on?”

“That’s the way it is.”

He slowly lowers himself back into his seat, saying, “Horse muh-noo-ur.”

Harding looks about at the other Acutes around the card table. “Gentlemen, already I seem to

detect in our redheaded challenger a most unheroic decline of his TV-cowboy stoicism.”

He looks at McMurphy across the table, smiling, McMurphy nods at him and tips his head back

for the wink and licks his big thumb. “Well sir, of Professor Harding sounds like he’s [74] getting

cocky. He wins a couple of splits and he goes to comin’ on like a wise guy. Well well well; there he

sits with a deuce showing and here’s a pack of Mar-boros says he backs down. … Whups, he sees

me, okeedokee, Perfessor, here’s a trey, he wants another, gets another deuce, try for the big five,

Perfessor? Try for that big double pay, or play it safe? Another pack says you won’t. Well well well,

the Perfessor sees me, this tells the tale, too bad, another lady and the Perfessor flunks his exams. …”

The next song starts up from the speaker, loud and clangy and a lot of accordion. McMurphy

takes a look up at the speaker, and his spiel gets louder and louder to match it.

“... hey-ya hey-ya, okay, next, goddammit, you hit or you sit ... comin at ya ...!”

Right up to the lights out at nine-thirty.

I could of watched McMurphy at that blackjack table all night, the way he dealt and talked and

roped them in and led them smack up to the point where they were just about to quit, then backed

down a hand or two to give them confidence and bring them along again. Once he took a break for

a cigarette and tilted back in his chair, his hands folded behind his head, and told the guys, “The

secret of being a top-notch con man is being able to know what the mark wants, and how to make

him think he’s getting it. I learned that when I worked a season on a skillo wheel in a carnival. You

fe-e-el the sucker over with your eyes when he comes up and you say, ‘Now here’s a bird that needs to

feel tough.’ So every time he snaps at you for taking him you quake in your boots, scared to death,

and tell him, ‘Please, sir. No trouble. The next roll is on the house, sir.’ So the both of you are

getting what you want.”

He rocks forward, and the legs of his chair come down with a crack. He picks up the deck, zips

his thumb over it, knocks the edge of it against the table top, licks his thumb and finger.

“And what I deduce you marks need is a big fat pot to temptate you. Here’s ten packages on the

next deal. Hey- yah, comin’ at you, guts ball from here on out. ...”

And throws back his head and laughs out loud at the way the guys hustled to get their bets down.

That laugh banged around the day room all evening, and all the time he was dealing he was joking

and talking and trying to get the players to laugh along with him. But they were all afraid to loosen

up; it’d been too long. He gave up trying and settled down to serious dealing. They won the deal off

him [75] a time or two, but he always bought it back or fought it back, and the cigarettes on each

side of him grew in bigger and bigger pyramid stacks.

Then just before nine-thirty he started letting them win, lets them win it all back so fast they

don’t hardly remember losing. He pays out the last couple of cigarettes and lays down the deck and

leans back with a sigh and shoves the cap out of his eyes, and the game is done.

47

Ken Kesey one flew over the cuckoo’s nest

“Well, sir, win a few, lose the rest is what I say.” He shakes his head so forlorn. “I don’t know—I

was always a pretty shrewd customer at twenty-one, but you birds may just be too tough for me. You

got some kinda uncanny knack, makes a man leery of playing against such sharpies for real money

tomorrow.”

He isn’t even kidding himself into thinking they fall for that. He let them win, and every one of

us watching the game knows it. So do the players. But there still isn’t a man raking his pile of

cigarettes—cigarettes he didn’t really win but only won back because they were his in the first

place—that doesn’t have a smirk on his face like he’s the toughest gambler on the whole Mississippi.

The fat black boy and a black boy named Geever run us out of the day room and commence

turning lights off with a little key on a chain, and as the ward gets dimmer and darker the eyes of the

little birthmarked nurse in the station get bigger and brighter. She’s at the door of the glass station,

issuing nighttime pills to the men that shuffle past her in a line, and she’s having a hard time keeping

straight who gets poisoned with what tonight. She’s not even watching where she pours the water.

What has distracted her attention this way is that big redheaded man with the dreadful cap and the

horrible-looking scar, coming her way. She’s watching McMurphy walk away from the card table in

the dark day room, his one horny hand twisting the red tuft of hair that sticks out of the little cup at

the throat of his work-farm shirt, and I figure by the way she rears back when he reaches the door of

the station that she’s probably been warned about him beforehand by the Big Nurse. (“Oh, one

more thing before I leave it in your hands tonight, Miss Pilbow; that new man sitting over there, the

one with the garish red sideburns and facial lacerations—I’ve reason to believe he is a sex maniac.”)

McMurphy sees how she’s looking so scared and big-eyed at him, so he sticks his head in the

station door where she’s issuing pills, and gives her a big friendly grin to get acquainted [76] on. This

flusters her so she drops the water pitcher on her foot. She gives a cry and hops on one foot, jerks

her hand, and the pill she was about to give me leaps out of the little cup and right down the neck of

her uniform where that birthmark stain runs like a river of wine down into a valley.

“Let me give you a hand, ma’am.”

And that very hand comes through the station door, scarred and tattooed and the color of raw

meat.

“Stay back! There are two aides on the ward with me!”

She rolls her eyes for the black boys, but they are off tying Chronics in bed, nowhere close

enough to help in a hurry. McMurphy grins and turns the hand over so she can see he isn’t holding a

knife. All she can see is the light shining off the slick, waxy, callused palm.

“All I mean to do, miss, is to—”

“Stay back! Patients aren’t allowed to enter the—Oh, stay back, I’m a Catholic!” and straightaway

jerks at the gold chain around her neck so a cross flies out from between her bosoms, slingshots the

lost pill up in the air! McMurphy strikes at the air right in front of her face. She screams and pops

the cross in her mouth and clinches her eyes shut like she’s about to get socked, stands like that,

paper-white except for that stain which turns darker than ever, as though it sucked the blood from

all the rest of her body. When she finally opens her eyes again there’s that callused hand right in

front of her with my little red capsule sitting in it.

“— was to pick up your waterin’ can you dropped.” He holds that out in the other hand.

Her breath comes out in a loud hiss. She takes the can from him. “Thank you. Good night, good

night,” and closes the door in the next man’s face, no more pills tonight.

In the dorm McMurphy tosses the pill on my bed. “You want your sourball, Chief?”

I shake my head at the pill, and he flips it off the bed like it was a bug pestering him. It hops

across the floor with a cricket scrabble. He goes to getting ready for bed, pulling off his clothes. The

shorts under his work pants are coal black satin covered with big white whales with red eyes. He

grins when he sees I’m looking at the shorts. “From a co-ed at Oregon State, Chief, a Literary

48

Ken Kesey one flew over the cuckoo’s nest

major.” He snaps the elastic with his thumb. “She gave them to me because she said I was a

symbol.”

His arms and neck and face are sunburned and bristled with curly orange hairs. He’s got tattoos

on each big shoulder; one [77] says “Fighting Leathernecks” and has a devil with a red eye and red

horns and an M-1 rifle, and the other is a poker hand fanned out across his muscle—aces and eights.

He puts his roll of clothes on the nightstand next to my bed and goes to punching at his pillow. He’s

been assigned the bed right next to mine.

He gets between the sheets and tells me I better hit the sack myself, that here comes one of those

black boys to douse the lights on us. I look around, and the black boy named Geever is coming, and

I kick off my shoes and get in bed just as he walks up to tie a sheet across me. When he’s finished

with me he takes a last look around and giggles and flips the dorm lights off.

Except for the white powder of light from the Nurses’ Station out in the hall, the dorm is dark. I

can just make out McMurphy next to me, breathing deep and regular, the covers over him rising and

falling. The breathing gets slower and slower, till I figure he’s been asleep for a while. Then I hear a

soft, throaty sound from his bed, like the chuckle of a horse. He’s still awake and he’s laughing to

himself about something.

He stops laughing and whispers, “Why, you sure did give a jump when I told you that coon was

coming, Chief. I thought somebody told me you was deef.”

49

Ken Kesey one flew over the cuckoo’s nest

7

First time for a long, long time I’m in bed without taking that little red capsule (if I hide to keep

from taking it, the night nurse with the birthmark sends the black boy named Geever out to hunt me

down, hold me captive with his flashlight till she can get the needle ready), so I fake sleep when the

black boy’s coming past with his light.

When you take one of those red pills you don’t just go to sleep; you’re paralyzed with sleep, and

all night long you can’t wake, no matter what goes on around you. That’s why the staff gives me the

pills; at the old place I took to waking up at night and catching them performing all kinds of horrible

crimes on the patients sleeping around me.

I lie still and slow my breathing, waiting to see if something is going to happen. It is dark my lord

and I hear them slipping around out there in their rubber shoes; twice they peek in the dorm and

run a flashlight over everybody. I keep my eyes shut and keep awake. I hear a wailing from up on

Disturbed, loo loo looo—got some guy wired to pick up code signals.

“Oh, a beer, I think, fo’ the long night ahead,” I hear a black boy whisper to the other. Rubber

shoes squeak off toward the Nurses’ Station, where the refrigerator is. “You like a beer, sweet thing

with a birthmark? Fo’ the long night ahead?”

The guy upstairs hushes. The low whine of the devices in the walls gets quieter and quieter, till it

hums down to nothing. Not a sound across the hospital—except for a dull, padded rumbling

somewhere deep in the guts of the building, a sound that I never noticed before—a lot like the

sound you hear when you’re standing late at night on top of a big hydroelectric dam. Low, relentless,

brute power.

The fat black boy stands out there in the hall where I can see him, looking all around and

giggling. He walks toward the dorm door, slow, wiping the wet gray palms in his armpits. The light

from the Nurses’ Station throws his shadow on the dorm wall big as an elephant, gets smaller as he

walks to the dorm door and looks in. He giggles again and unlocks the [79] fuse box by the door and

reaches in. “Tha’s right, babies, sleep tight.”

Twists a knob, and the whole floor goes to slipping down away from him standing in the door,

lowering into the building like a platform in a grain elevator!

Not a thing but the dorm floor moves, and we’re sliding away from the walls and door and the

windows of the ward at a hell of a clip—beds, bedstands, and all. The machinery—probably a cogand-track affair at each corner of the shaft-is greased silent as death. The only sound I hear is the

guys breathing, and that drumming under us getting louder the farther down we go. The light of the

dorm door five hundred yards back up this hole is nothing but a speck, dusting the square sides of

the shaft with a dim powder. It gets dimmer and dimmer till a faraway scream comes echoing down

the sides of the shaft—“Stay back!” —and the light goes out altogether.

The floor reaches some kind of solid bottom far down in the ground and stops with a soft jar.

It’s dead black, and I can feel the sheet around me choking off my wind. Just as I get the sheet

untied, the floor starts sliding forward with a little jolt. Some kind of castors under it I can’t hear. I

can’t even hear the guys around me breathing, and I realize all of a sudden it’s because that

drumming’s gradually got so loud I can’t hear anything else. We must be square in the middle of it. I

go to clawing at that damned sheet tied across me and just about have it loose when a whole wall

slides up, reveals a huge room of endless machines stretching clear out of sight, swarming with

sweating, shirtless men running up and down catwalks, faces blank and dreamy in firelight thrown

from a hundred blast furnaces.

50

Ken Kesey one flew over the cuckoo’s nest

It—everything I see—looks like it sounded, like the inside of a tremendous dam. Huge brass

tubes disappear upward in the dark. Wires run to transformers out of sight. Grease and cinders catch

on everything, staining the couplings and motors and dynamos red and coal black.

The workers all move at the same smooth sprint, an easy, fluid stride. No one’s in a hurry. One

will hold up a second, spin a dial, push a button, throw a switch, and one side of his face flashes

white like lightning from the spark of the connecting switch, and run on, up steel steps and along a

corrugated iron catwalk—pass each other so smooth and close I hear the slap of wet sides like the

slap of a salmon’s tail on water—stop again, throw lightning from another switch, and run on again.

[80] They twinkle in all directions clean on out of sight, these flash pictures of the dreamy doll faces

of the workmen.

A workman’s eyes snap shut while he’s going at full run, and he drops in his tracks; two of his

buddies running by grab him up and lateral him into a furnace as they pass. The furnace whoops a

ball of fire and I hear the popping of a million tubes like walking through a field of seed pods. This

sound mixes with the whirr and clang of the rest of the machines.

There’s a rhythm to it, like a thundering pulse.

The dorm floor slides on out of the shaft and into the machine room. Right away I see what’s

straight above us—one of those trestle affairs like you find in meat houses, rollers on tracks to move

carcasses from the cooler to the butcher without much lifting. Two guys in slacks, white shirts with

the sleeves turned back, and thin black ties are leaning on the catwalk above our beds, gesturing to

each other as they talk, cigarettes in long holders tracing lines of red light. They’re talking but you

can’t make out the words above the measured roar rising all around them. One of the guys snaps his

fingers, and the nearest workman veers in a sharp turn and sprints to his side. The guy points down

at one of the beds with his cigarette holder, and the worker trots off to the steel stepladder and runs

down to our level, where he goes out of sight between two transformers huge as potato cellars.

When that worker appears again he’s pulling a hook along the trestle overhead and taking giant

strides as he swings along it. He passes my bed and a furnace whooping somewhere suddenly lights

his face up right over mine, a face handsome and brutal and waxy like a mask, wanting nothing. I’ve

seen a million faces like it.

He goes to the bed and with one hand grabs the old Vegetable Blastic by the heel and lifts him

straight up like Blastic don’t weigh more’n a few pounds; with the other hand the worker drives the

hook through the tendon back of the heel, and the old guy’s hanging there upside down, his moldy

face blown up big, scared, the eyes scummed with mute fear. He keeps flapping both arms and the

free leg till his pajama top falls around his head. The worker grabs the top and bunches and twists it

like a burlap sack and pulls the trolley clicking back over the trestle to the catwalk and looks up to

where those two guys in white shirts are standing. One of the guys takes a scalpel from a holster at

his belt. There’s a chain welded to the scalpel. The guy lowers it to the worker, loops the other end

of the chain around the railing so the worker can’t run off with a weapon.

[81] The worker takes the scalpel and slices up the front of old Blastic with a clean swing and the

old man stops thrashing around. I expect to be sick, but there’s no blood or innards falling out like I

was looking to see—just a shower of rust and ashes, and now and again a piece of wire or glass.

Worker’s standing there to his knees in what looks like clinkers.

A furnace got its mouth open somewhere, licks up somebody.

I think about jumping up and running around and waking up McMurphy and Harding and as

many of the guys as I can, but there wouldn’t be any sense in it. If I shook somebody awake he’d

say, Why you crazy idiot, what the hell’s eating you? And then probably help one of the workers lift

me onto one of those hooks himself, saying, How about let’s see what the insides of an Indian are

like?

51

Ken Kesey one flew over the cuckoo’s nest

I hear the high, cold, whistling wet breath of the fog machine, see the first wisps of it come

seeping out from under McMurphy’s bed. I hope he knows enough to hide in the fog.

I hear a silly prattle reminds me of somebody familiar, and I roll enough to get a look down the

other way. It’s the hairless Public Relation with the bloated face, that the patients are always arguing

about why it’s bloated. “I’ll say he does,” they’ll argue. “Me, I’ll say he doesn’t; you ever hear of a guy

really who wore one?” “Yeh, but you ever hear of a guy like him before?” The first patient shrugs and

nods, “Interesting point.”

Now he’s stripped except for a long undershirt with fancy monograms sewed red on front and

back. And I see once and for all (the undershirt rides up his back some as he comes walking past,

giving me a peek) that he definitely does wear one, laced so tight it might blow up any second.

And dangling from the stays he’s got half a dozen withered objects, tied by the hair like scalps.

He’s carrying a little flask of something that he sips from to keep his throat open for talking, and

a camphor hanky he puts in front of his nose from time to time to stop out the stink. There’s a

clutch of schoolteachers and college girls and the like hurrying after him. They wear blue aprons and

their hair in pin curls. They are listening to him give a brief lecture on the tour.

He thinks of something funny and has to stop his lecture long enough for a swig from the flask

to stop the giggling. During the pause one of his pupils stargazes around and sees the gutted

Chronic dangling by his heel. She gasps and jumps back. The Public Relation turns and catches sight

of the corpse and rushes to take one of those limp hands and give it a spin. The [82] student shrinks

forward for a cautious look, face in a trance.

“You see? You see?” He squeals and rolls his eyes and spews stuff from his flask he’s laughing so

hard. He’s laughing till i think he’ll explode.

When he finally drowns the laughing he starts back along the row of machines and goes into his

lecture again. He stops suddenly and slaps his forehead—“Oh, scatterbrained me!” —and comes

running back to the hanging Chronic to rip off another trophy and tie it to his girdle.

Right and left there are other things happening just as bad—crazy, horrible things too goofy and

outlandish to cry about and too much true to laugh about—but the fog is getting thick enough I

don’t have to watch. And somebody’s tugging at my arm. I know already what will happen:

somebody’ll drag me out of the fog and we’ll be back on the ward and there won’t be a sign of what

went on tonight and if I was fool enough to try and tell anybody about it they’d say, Idiot, you just

had a nightmare; things as crazy as a big machine room down in the bowels of a dam where people

get cut up by robot workers don’t exist.

But if they don’t exist, how can a man see them?

It’s Mr. Turkle that pulls me out of the fog by the arm, shaking me and grinning. He says, “You

havin’ a bad dream, Mistuh Bromden.” He’s the aide works the long lonely shift from 11 to 7, an old

Negro man with a big sleepy grin on the end of a long wobbly neck. He smells like he’s had a little

to drink. “Back to sleep now, Mistuh Bromden.”

Some nights he’ll untie the sheet from across me if it’s so tight I squirm around. He wouldn’t do

it if he thought the day crew knew it was him, because they’d probably fire him, but he figures the

day crew will think it was me untied it. I think he really does it to be kind, to help—but he makes

sure he’s safe first.

This time he doesn’t untie the sheet but walks away from me to help two aides I never saw

before and a young doctor lift old Blastic onto the stretcher and carry him out, covered with a

sheet—handle him more careful than anybody ever handled him before in all his life.

52

Ken Kesey one flew over the cuckoo’s nest

8

Come morning, McMurphy is up before I am, the first time anybody been up before me since

Uncle Jules the Wallwalker was here. Jules was a shrewd old white-haired Negro with a theory the

world was being tipped over on its side during the night by the black boys; he used to slip out in the

early mornings, aiming to catch them tipping it. Like Jules, I’m up early in the mornings to watch

what machinery they’re sneaking onto the ward or installing in the shaving room, and usually it’s just

me and the black boys in the hall for fifteen minutes before the next patient is out of bed. But this

morning I hear McMurphy out there in the latrine as I come out of the covers. Hear him singing!

Singing so you’d think he didn’t have a worry in the world. His voice is clear and strong slapping up

against the cement and steel.

“ ‘Your horses are hungry, that’s what she did say.’ ” He’s enjoying the way the sound rings in the

latrine. “ ‘Come sit down beside me, an’ feed them some hay.’ ” He gets a breath, and his voice

jumps a key, gaining pitch and power till it’s joggling the wiring in all the walls. “ ‘My horses ain’t

hungry, they won’t eat your hay-ay-aeee.’ ” He holds the note and plays with it, then swoops down

with the rest of the verse to finish it off. “ ‘So fare-thee-well, darlin’, I’m gone on my way.’ ”

Singing! Everybody’s thunderstruck. They haven’t heard such a thing in years, not on this ward.

Most of the Acutes in the dorm are up on their elbows, blinking and listening. They look at one

another and raise their eyebrows. How come the black boys haven’t hushed him up out there? They

never let anybody raise that much racket before, did they? How come they treat this new guy

different? He’s a man made outa skin and bone that’s due to get weak and pale and die, just like the

rest of us. He lives under the same laws, gotta eat, bumps up against the same troubles; these things

make him just as vulnerable to the Combine as anybody else, don’t they?

But the new guy is different, and the Acutes can see it, different from anybody been coming on

this ward for the past ten years, different from anybody they ever met outside. He’s just as

vulnerable, maybe, but the Combine didn’t get him.

[84] “ ‘My wagons are loaded,’ ” he sings, “ ‘my whip’s in my hand ...’ ”

How’d he manage to slip the collar? Maybe, like old Pete, the Combine missed getting to him

soon enough with controls. Maybe he growed up so wild all over the country, batting around from

one place to another, never around one town longer’n a few months when he was a kid so a school

never got much a hold on him, logging, gambling, running carnival wheels, traveling lightfooted and

fast, keeping on the move so much that the Combine never had a chance to get anything installed.

Maybe that’s it, he never gave the Combine a chance, just like he never gave the black boy a chance

to get to him with the thermometer yesterday morning, because a moving target is hard to hit.

No wife wanting new linoleum. No relatives pulling at him with watery old eyes. No one to care

about, which is what makes him free enough to be a good con man. And maybe the reason the black

boys don’t rush into that latrine and put a stop to his singing is because they know he’s out of

control, and they remember that time with old Pete and what a man out of control can do. And they

can see that McMurphy’s a lot bigger than old Pete; if it comes down to getting the best of him, it’s

going to take all three of them and the Big Nurse waiting on the sidelines with a needle. The Acutes

nod at one another; that’s the reason, they figure, that the black boys haven’t stopped his singing

where they would stop any of the rest of us.

I come out of the dorm into the hall just as McMurphy comes out of the latrine. He’s got his cap

on and not much else, just a towel grabbed around his hips. He’s holding a toothbrush in his other

hand. He stands in the hall, looking up and down, rocking up on his toes to keep off the cold tile as

much as he can. Picks him out a black boy, the least one, and walks up to him and whaps him on the

shoulder just like they’d been friends all their lives.

53

Ken Kesey one flew over the cuckoo’s nest

“Hey there, old buddy, what’s my chance of gettin’ some toothpaste for brushin’ my grinders?”

The black boy’s dwarf head swivels and comes nose to knuckle with that hand. He frowns at it,

then takes a quick check where’s the other two black boys just in case, and tells McMurphy they

don’t open the cabinet till six-forty-five. “It’s a policy,” he says.

“Is that right? I mean, is that where they keep the toothpaste? In the cabinet?”

“Tha’s right, locked in the cabinet.”

[85] The black boy tries to go back to polishing the baseboards, but that hand is still lopped over

his shoulder like a big red clamp.

“Locked in the cabinet, is it? Well well well, now why do you reckon they keep the toothpaste

locked up? I mean, it ain’t like it’s dangerous, is it? You can’t poison a man with it, can you? You

couldn’t brain some guy with the tube, could you? What reason you suppose they have for puttin’

something as harmless as a little tube of toothpaste under lock and key?”

“It’s ward policy, Mr. McMurphy, tha’s the reason.” And when he sees that this last reason don’t

affect McMurphy like it should, he frowns at that hand on his shoulder and adds, “What you s’pose

it’d be like if evahbody was to brush their teeth whenever they took a notion to brush?”

McMurphy turns loose the shoulder, tugs at that tuft of red wool at his neck, and thinks this

over. “Uh-huh, uh-huh, I think I can see what you’re drivin’ at: ward policy is for those that can’t

brush after every meal.”

“My gaw, don’t you see?”

“Yes, now, I do. You’re saying people’d be brushin’ their teeth whenever the spirit moved them.”

“Tha’s right, tha’s why we—”

“And, lordy, can you imagine? Teeth bein’ brushed at six-thirty, six-twenty—who can tell? maybe

even six o’clock. Yeah, I can see your point.”

He winks past the black boy at me standing against the wall.

“I gotta get this baseboard cleaned, McMurphy.”

“Oh. I didn’t mean to keep you from your job.” He starts to back away as the black boy bends to

his work again. Then he comes forward and leans over to look in the can at the black boy’s side.

“Well, look here; what do we have here?”

The black boy peers down. “Look where?”

“Look here in this old can, Sam. What is the stuff in this old can?”

“Tha’s … soap powder.”

“Well, I generally use paste, but”—McMurphy runs his toothbrush down in the powder and

swishes it around and pulls it out and taps it on the side of the can—“but this will do fine for me. I

thank you. We’ll look into that ward policy business later.”

And he heads back to the latrine, where I can hear his singing garbled by the piston beat of his

toothbrushing.

That black boy’s standing there looking after him with his scrub rag hanging limp in his gray

hand. After a minute he [86] blinks and looks around and sees I been watching and comes over and

drags me down the hall by the drawstring on my pajamas and pushes me to a place on the floor I

just did yesterday.

“There! Damn you, right there! That’s where I want you workin’, not gawkin’ around like some

big useless cow! There! There!”

And I lean over and go to mopping with my back to him so he won’t see me grin. I feel good,

seeing McMurphy get that black boy’s goat like not many men could. Papa used to be able to do it—

spraddle-legged, dead-panned, squinting up at the sky that first time the government men showed up

to negotiate about buying off the treaty. “Canada honkers up there,” Papa says, squinting up.

Government men look, rattling papers. “What are you—? In July? There’s no—uh—geese this time

of year. Uh, no geese.”

54

Ken Kesey one flew over the cuckoo’s nest

They had been talking like tourists from the East who figure you’ve got to talk to Indians so

they’ll understand. Papa didn’t seem to take any notice of the way they talked. He kept looking at the

sky. “Geese up there, white man. You know it. Geese this year. And last year. And the year before

and the year before.”

The men looked at one another and cleared their throats. “Yes. Maybe true, Chief Bromden.

Now. Forget geese. Pay attention to contract. What we offer could greatly benefit you—your

people—change the lives of the red man.”

Papa said, “... and the year before and the year before and the year before ...”

By the time it dawned on the government men that they were being poked fun at, all the council

who’d been sitting on the porch of our shack, putting pipes in the pockets of their red and black

plaid wool shirts and taking them back out again, grinning at one another and at Papa—they had all

busted up laughing fit to kill. Uncle R & J Wolf was rolling on the ground, gasping with laughter and

saying, “You know it, white man.”

It sure did get their goat; they turned without saying a word and walked off toward the highway,

red-necked, us laughing behind them. I forget sometimes what laughter can do.

The Big Nurse’s key hits the lock, and the black boy is up to her soon as she’s in the door,

shifting from foot to foot like a kid asking to pee. I’m close enough I hear McMurphy’s name come

into his conversation a couple of times, so I know he’s telling her about McMurphy brushing his

teeth, completely [87] forgetting to tell her about the old Vegetable who died during the night.

Waving his arms and trying to tell her what that fool redhead’s been up to already, so early in the

morning—disrupting things, goin’ contrary to ward policy, can’t she do something?

She glares at the black boy till he stops fidgeting, then looks up the hall to where McMurphy’s

singing is booming out of the latrine door louder than ever. “ ‘Oh, your parents don’t like me, they

say I’m too po-o-or; they say I’m not worthy to enter your door.’ ”

Her face is puzzled at first; like the rest of us, it’s been so long since she’s heard singing it takes

her a second to recognize what it is.

“ ‘Hard livin’s my pleasure, my money’s my o-o-own, an’ them that don’t like me, they can leave

me alone.’ ”

She listens a minute more to make sure she isn’t hearing things; then she goes to puffing up. Her

nostrils flare open, and every breath she draws she gets bigger, as big and tough-looking’s I seen her

get over a patient since Taber was here. She works the hinges in her elbows and fingers. I hear a

small squeak. She starts moving, and I get back against the wall, and when she rumbles past she’s

already big as a truck, trailing that wicker bag behind in her exhaust like a semi behind a Jimmy

Diesel. Her lips are parted, and her smile’s going out before her like a radiator grill. I can smell the

hot oil and magneto spark when she goes past, and every step hits the floor she blows up a size

bigger, blowing and puffing, roll down anything in her path! I’m scared to think what she’ll do.

Then, just as she’s rolling along at her biggest and meanest, McMurphy steps out of the latrine

door right in front of her, holding that towel around his hips—stops her dead! She shrinks to about

head-high to where that towel covers him, and he’s grinning down on her. Her own grin is giving

way, sagging at the edges.

“Good morning, Miss Rat-shed! How’s things on the outside?”

“You can’t run around here—in a towel!”

“No?” He looks down at the part of the towel she’s eye to eye with, and it’s wet and skin tight.

“Towels against ward policy too? Well, I guess there’s nothin’ to do exec—”

“Stop! don’t you dare. You get back in that dorm and get your clothes on this instant!”

55

Ken Kesey one flew over the cuckoo’s nest

She sounds like a teacher bawling out a student, so McMurphy hangs his head like a student and

says in a voice sounds like he’s about to cry, “I can’t do that, ma’am. I’m [88] afraid some thief in the

night boosted my clothes whilst I slept. I sleep awful sound on the mattresses you have here.”

“Somebody boosted ...?”

“Pinched. Jobbed. Swiped. Stole,” he says happily. “You know, man, like somebody boosted my

threads.” Saying this tickles him so he goes into a little barefooted dance before her.

“Stole your clothes?”

“That looks like the whole of it.”

“But—prison clothes? Why?”

He stops jigging around and hangs his head again. “All I know is that they were there when I

went to bed and gone when I got up. Gone slick as a whistle. Oh, I do know they were nothing but

prison clothes, coarse and faded and uncouth, ma’am, well I know it—and prison clothes may not

seem like much to those as has more. But to a nude man—”

“That outfit,” she says, realizing, “was supposed to be picked up. You were issued a uniform of

green convalescents this morning.”

He shakes his head and sighs, but still don’t look up. “No. No, I’m afraid I wasn’t. Not a thing

this morning but the cap that’s on my head and—”

“Williams,” she hollers down to the black boy who’s still at the ward door like he might make a

run for it. “Williams, can you come here a moment?”

He crawls to her like a dog to a whipping.

“Williams, why doesn’t this patient have an issue of convalescents?”

The black boy is relieved. He straightens up and grins, raises that gray hand and points down the

other end of the hall to one of the big ones. “Mistuh Washington over there is ‘signed to the laundry

duty this mornin’. Not me. No.”

“Mr. Washington!” She nails him with his mop poised over the bucket, freezes him there. “Will

you come here a moment!” The mop slides without a sound back in the bucket, and with slow,

careful movements he leans the handle against the wall. He turns around and looks down at

McMurphy and the least black boy and the nurse. He looks then to his left and to his right, like she

might be yelling at somebody else.

“Come down here!”

He puts his hands in his pockets and starts shuffling down the hall to her. He never walks very

fast, and I can see how if he don’t get a move on she might freeze him and shatter him all to hell by

just looking; all the hate and fury and frustration she was planning to use on McMurphy is beaming

out down the hall at the black boy, and he can feel it blast against him [89] like a blizzard wind,

slowing him more than ever. He has to lean into it, pulling his arms around him. Frost forms in his

hair and eyebrows. He leans farther forward, but his steps are getting slower; he’ll never make it.

Then McMurphy takes to whistling “Sweet Georgia Brown,” and the nurse looks away from the

black boy just in time. Now she’s madder and more frustrated than ever, madder’n I ever saw her

get. Her doll smile is gone, stretched tight and thin as a red-hot wire. If some of the patients could

be out to see her now, McMurphy could start collecting his bets.

The black boy finally gets to her, and it took him two hours. She draws a long breath.

“Washington, why wasn’t this man issued a change of greens this morning? Couldn’t you see he had

nothing on but a towel?”

“And my cap,” McMurphy whispers, tapping the brim with his finger.

“Mr. Washington?”

The big black boy looks at the little one who pointed him out, and the little black boy

commences to fidget again. The big boy looks at him a long time with those radio-tube eyes, plans

to square things with him later; then the head turns and he looks McMurphy up and down, taking in

56

Ken Kesey one flew over the cuckoo’s nest

the hard, heavy shoulders, the lopsided grin, the scar on the nose, the hand clamping the towel in

place, and then he looks at the nurse.

“I guess—” he starts out.

“You guess! You’ll do more than guess! You’ll get him a uniform this instant, Mr. Washington, or

spend the next two weeks working on Geriatrics Ward! Yes. You may need a month of bedpans and

slab baths to refresh your appreciation of just how little work you aides have to do on this ward. If

this was one of the other wards, who do you think would be scouring the hall all day? Mr. Bromden

here? No, you know who it would be. We excuse you aides from most of your housekeeping duties

to enable you to see to the patients. And that means seeing that they don’t parade around exposed.

What do you think would have happened if one of the young nurses had come in early and found a

patient running round the halls without a uniform? What do you think!”

The big black boy isn’t too sure what, but he gets her drift and ambles off to the linen room to

get McMurphy a set of greens—probably ten sizes too small—and ambles back and holds it out to

him with a look of the clearest hate I ever saw. McMurphy just looks confused, like he don’t know

how to take the outfit the black boy’s handing to him, what with one hand holding the toothbrush

and the other hand holding up [90] the towel. He finally winks at the nurse and shrugs and unwraps

the towel, drapes it over her shoulder like she was a wooden rack.

I see he had his shorts on under the towel all along.

I think for a fact that she’d rather he’d of been stark naked under that towel than had on those

shorts. She’s glaring at those big white whales leaping round on his shorts in pure wordless outrage.

That’s more’n she can take. It’s a full minute before she can pull herself together enough to turn on

the least black boy; her voice is shaking out of control, she’s so mad.

“Williams … I believe … you were supposed to have the windows of the Nurses’ Station

polished by the time I arrived this morning.” He scuttles off like a black and white bug. “And you,

Washington—and you ...” Washington shuffles back to his bucket in almost a trot. She looks around

again, wondering who else she can light into. She spots me, but by this time some of the other

patients are out of the dorm and wondering about the little clutch of us here in the hall. She closes

her eyes and concentrates. She can’t have them see her face like this, white and warped with fury.

She uses all the power of control that’s in her. Gradually the lips gather together again under the

little white nose, run together, like the red-hot wire had got hot enough to melt, shimmer a second,

then click solid as the molten metal sets, growing cold and strangely dull. Her lips part, and her

tongue comes between them, a chunk of slag. Her eyes open again, and they have that strange dull

and cold and flat look the lips have, but she goes into her good-morning routine like there was

nothing different about her, figuring the patients’ll be too sleepy to notice.

“Good morning, Mr. Sefelt, are your teeth any better? Good morning, Mr. Fredrickson, did you

and Mr. Sefelt have a good night last night? You bed right next to each other, don’t you?

Incidentally, it’s been brought to my attention that you two have made some arrangement with your

medication—you are letting Bruce have your medication, aren’t you, Mr. Sefelt? We’ll discuss that

later. Good morning, Billy; I saw your mother on the way in, and she told me to be sure to tell you

she thought of you all the time and knew you wouldn’t disappoint her. Good morning, Mr.

Harding—why, look, your fingertips are red and raw. Have you been chewing your fingernails

again?”

Before they could answer, even if there was some answer to make, she turns to McMurphy still

standing there in his shorts. Harding looks at the shorts and whistles.

[91] “And you, Mr. McMurphy,” she says, smiling, sweet as sugar, “if you are finished showing

off your manly physique and your gaudy underpants, I think you had better go back in the dorm and

put on your greens.”

57

Ken Kesey one flew over the cuckoo’s nest

He tips his cap to her and to the patients ogling and poking fun at his white-whale shorts, and

goes to the dorm without a word. She turns and starts off in the other direction, her flat red smile

going out before her; before she’s got the door closed on her glass station, his singing is rolling from

the dorm door into the hall again.

“ ‘She took me to her parlor, and coo-oo-ooled me with her fan’ ”—I can hear the whack as he

slaps his bare belly—“ ‘whispered low in her mamma’s ear, I luh-uhvvv that gamblin’ man.’ ”

Sweeping the dorm soon’s it’s empty, I’m after dust mice under his bed when I get a smell of

something that makes me realize for the first time since I been in the hospital that this big dorm full

of beds, sleeps forty grown men, has always been sticky with a thousand other smells—smells of

germicide, zinc ointment, and foot powder, smell of piss and sour old-man manure, of Pablum and

eyewash, of musty shorts and socks musty even when they’re fresh back from the laundry, the stiff

odor of starch in the linen, the acid stench of morning mouths, the banana smell of machine oil, and

sometimes the smell of singed hair—but never before now, before he came in, the man smell of

dust and dirt from the open fields, and sweat, and work.

58

Ken Kesey one flew over the cuckoo’s nest

9

All through breakfast McMurphy’s talking and laughing a mile a minute. After this morning he

thinks the Big Nurse is going to be a snap. He don’t know he just caught her off guard and, if

anything, made her strengthen herself.

He’s being the clown, working at getting some of the guys to laugh. It bothers him that the best

they can do is grin weakly and snigger sometimes. He prods at Billy Bibbit, sitting across the table

from him, says in a secret voice, “Hey, Billy boy, you remember that time in Seattle you and me

picked up those two twitches? One of the best rolls I ever had.”

Billy’s eyes bob up from his plate. He opens his mouth but can’t say a thing. McMurphy turns to

Harding.

“We’d never have brought it off, neither, picking them up on the spur of the moment that way,

except that they’d heard tell of Billy Bibbit. Billy ‘Club’ Bibbit, he was known as in them days. Those

girls were about to take off when one looked at him and says ‘Are you the renowned Billy Club

Bibbit? Of the famous fourteen inches?’ And Billy ducked his head and blushed—like he’s doin’

now—and we were a shoo-in. And I remember, when we got them up to the hotel, there was this

woman’s voice from over near Billy’s bed, says, ‘Mister Bibbit, I’m disappointed in you; I heard that

you had four—four—for goodness sakes!’ ”

And whoops and slaps his leg and gooses Billy with his thumb till I think Billy will fall in a dead

faint from blushing and grinning.

McMurphy says that as a matter of fact a couple of sweet twitches like those two is the only thing

this hospital does lack. The bed they give a man here, finest he’s ever slept in, and what a fine table

they do spread. He can’t figure why everybody’s so glum about being locked up here.

“Look at me now,” he tells the guys and lifts a glass to the light, “getting my first glass of orange

juice in six months. Hooee, that’s good. I ask you, what did I get for breakfast at that work farm?

What was I served? Well, I can describe what it looked like, but I sure couldn’t hang a name on it;

morning noon and night it was burnt black and had potatoes in it and [93] looked like roofing glue. I

know one thing; it wasn’t orange juice. Look at me now: bacon, toast, butter, eggs—coffee the little

honey in the kitchen even asks me if I like it black or white thank you—and a great! big! cold glass

of orange juice. Why, you couldn’t pay me to leave this place!”

He gets seconds on everything and makes a date with the girl pours coffee in the kitchen for

when he gets discharged, and he compliments the Negro cook on sunnysiding the best eggs he ever

ate. There’s bananas for the corn flakes, and he gets a handful, tells the black boy that he’ll filch him

one ‘cause he looks so starved, and the black boy shifts his eyes to look down the hall to where the

nurse is sitting in her glass case, and says it ain’t allowed for the help to eat with the patients.

“Against ward policy?”

“Tha’s right.”

“Tough luck”—and peels three bananas right under the black boy’s nose and eats one after the

other, tells the boy that any time you want one snuck outa the mess hall for you, Sam, you just give

the word.

When McMurphy finishes his last banana he slaps his belly and gets up and heads for the door,

and the big black boy blocks the door and tells him the rule that patients sit in the mess hall till they

all leave at seven-thirty. McMurphy stares at him like he can’t believe he’s hearing right, then turns

and looks at Harding. Harding nods his head, so McMurphy shrugs and goes back to his chair. “I

sure don’t want to go against that goddamned policy.”

The clock at the end of the mess hall shows it’s a quarter after seven, lies about how we only

been sitting here fifteen minutes when you can tell it’s been at least an hour. Everybody is finished

59

Ken Kesey one flew over the cuckoo’s nest

eating and leaned back, watching the big hand to move to seven-thirty. The black boys take away the

Vegetables’ splattered trays and wheel the two old men down to get hosed off. In the mess hall

about half the guys lay their heads on their arms, figuring to get a little sleep before the black boys

get back. There’s nothing else to do, with no cards or magazines or picture puzzles. Just sleep or

watch the clock.

But McMurphy can’t keep still for that; he’s got to be up to something. After about two minutes

of pushing food scraps around his plate with his spoon, he’s ready for more excitement. He hooks

his thumbs in his pockets and tips back and one-eyes that clock up on the wall. Then he rubs his

nose.

“You know—that old clock up there puts me in mind of the targets at the target range at Fort

Riley. That’s where I got my first medal, a sharpshooter medal. Dead-Eye McMurphy. [94] Who

wants to lay me a pore little dollar that I can’t put this dab of butter square in the center of the face

of that clock up there, or at least on the face?”

He gets three bets and takes up his butter pat and puts it on his knife, gives it a flip. It sticks a

good six inches or so to the left of the clock, and everybody kids him about it until he pays his bets.

They’re still riding him about did he mean Dead-Eye or Dead-Eyes when the least black boy gets

back from hosing Vegetables and everybody looks into his plate and keeps quiet. The black boy

senses something is in the air, but he can’t see what. And he probably never would of known except

old Colonel Matterson is gazing around, and he sees the butter stuck up on the wall and this causes

him to point up at it and go into one of his lessons, explaining to us all in his patient, rumbling

voice, just like what he said made sense.

“The but-ter ... is the Re-pub-li-can party. ...”

The black boy looks where the colonel is pointing, and there that butter is, easing down the wall

like a yellow snail. He blinks at it but he doesn’t say a word, doesn’t even bother looking around to

make certain who flipped it up there.

McMurphy is whispering and nudging the Acutes sitting around him, and in a minute they all

nod, and he lays three dollars on the table and leans back. Everybody turns in his chair and watches

that butter sneak on down the wall, starting, hanging still, shooting ahead and leaving a shiny trail

behind it on the paint. Nobody says a word. They look at the butter, then at the clock, then back at

the butter. The clock’s moving now.

The butter makes it down to the floor about a half a minute before seven-thirty, and McMurphy

gets back all the money he lost.

The black boy wakes up and turns away from the greasy stripe on the wall and says we can go,

and McMurphy walks out of the mess hall, folding his money in his pocket. He puts his arms around

the black boy’s shoulders and half walks, half carries him, down the hall toward the day room. “The

day’s half gone, Sam, of buddy, an’ I’m just barely breaking even. I’ll have to hustle to catch up.

How about breaking out that deck of cards you got locked securely in that cabinet, and I’ll see if I

can make myself heard over that loudspeaker.”

Spends most of that morning hustling to catch up by dealing more blackjack, playing for IOUs

now instead of cigarettes. He moves the blackjack table two or three times to try to get [95] out

from under the speaker. You can tell it’s getting on his nerves. Finally he goes to the Nurses’ Station

and raps on a pane of glass till the Big Nurse swivels in her chair and opens the door, and he asks

her how about turning that infernal noise off for a while. She’s calmer than ever now, back in her

seat behind her pane of glass; there’s no heathen running around half-naked to unbalance her. Her

smile is settled and solid. She closes her eyes and shakes her head and tells McMurphy very

pleasantly, No.

60

Ken Kesey one flew over the cuckoo’s nest

“Can’t you even ease down on the volume? It ain’t like the whole state of Oregon needed to hear

Lawrence Welk play ‘Tea for Two’ three times every hour, all day long! If it was soft enough to hear

a man shout his bets across the table I might get a game of poker going—”

“You’ve been told, Mr. McMurphy, that it’s against the policy to gamble for money on the ward.”

“Okay, then down soft enough to gamble for matches, for fly buttons—just turn the damn thing

down!”

“Mr. McMurphy”—she waits and lets her calm schoolteacher tone sink in before she goes on;

she knows every Acute on the ward is listening to them—”do you want to know what I think? I

think you are being very selfish. Haven’t you noticed there are others in this hospital besides

yourself? There are old men here who couldn’t hear the radio at all if it were lower, old fellows who

simply aren’t capable of reading, or working puzzles—or playing cards to win other men’s cigarettes.

Old fellows like Matterson and Kittling, that music coming from the loudspeaker is all they have.

And you want to take that away from them. We like to hear suggestions and requests whenever we

can, but I should think you might at least give some thought to others before you make your

requests.”

He turns and looks over at the Chronic side and sees there’s something to what she says. He

takes off his cap and runs his hand in his hair, finally turns back to her. He knows as well as she

does that all the Acutes are listening to everything they say.

“Okay—I never thought about that.”

“I thought you hadn’t.”

He tugs at that little tuft of red showing out of the neck of his greens, then says. “Well, hey; what

do you say to us taking the card game someplace else? Some other room? Like, say, that room you

people put the tables in during that meeting. There’s nothing in there all the rest of the day. You

could unlock that room and let the card-players go in there, and leave [96] the old men out here with

their radio—a good deal all around.”

She smiles and closes her eyes again and shakes her head gently. “Of course, you may take the

suggestion up with the rest of the staff at some time, but I’m afraid everyone’s feelings will

correspond with mine: we do not have adequate coverage for two day rooms. There isn’t enough

personnel. And I wish you wouldn’t lean against the glass there, please; your hands are oily and

staining the window. That means extra work for some of the other men.”

He jerks his hand away, and I see he starts to say something and then stops, realizing she didn’t

leave him anything else to say, unless he wants to start cussing at her. His face and neck are red. He

draws a long breath and concentrates on his will power, the way she did this morning, and tells her

that he is very sorry to have bothered her, and goes back to the card table.

Everybody on the ward can feel that it’s started.

At eleven o’clock the doctor comes to the day-room door and calls over to McMurphy that he’d

like to have him come down to his office for an interview. “I interview all new admissions on the

second day.”

McMurphy lays down his cards and stands up and walks over to the doctor. The doctor asks him

how his night was, but McMurphy just mumbles an answer.

“You look deep in thought today, Mr. McMurphy.”

“Oh, I’m a thinker all right,” McMurphy says, and they walk off together down the hall. When

they come back what seems like days later, they’re both grinning and talking and happy about

something. The doctor is wiping tears off his glasses and looks like he’s actually been laughing, and

McMurphy is back as loud and full of brass and swagger as ever. He’s that way all through lunch,

and at one o’clock he’s the first one in his seat for the meeting, his eyes blue and ornery from his

place in the corner.

61

Ken Kesey one flew over the cuckoo’s nest

The Big Nurse comes into the day room with her covey of student nurses and her basket of

notes. She picks the log book up from the table and frowns into it a minute (nobody’s informed on

anybody all day long), then goes to her seat beside the door. She picks up some folders from the

basket on her lap and riffles through them till she finds the one on Harding.

“As I recall, we were making quite a bit of headway yesterday with Mr. Harding’s problem—”

“Ah—before we go into that,” the doctor says, “I’d like to interrupt a moment, if I might.

Concerning a talk Mr. [97] McMurphy and I had in my office this morning. Reminiscing, actually.

Talking over old times. You see Mr. McMurphy and I find we have something in common—we

went to the same high school.”

The nurses look at one another and wonder what’s got into this man. The patients glance at

McMurphy grinning from his corner and wait for the doctor to go on. He nods his head.

“Yes, the same high school. And in the course of our reminiscing we happened to bring up the

carnivals the school used to sponsor—marvelous, noisy, gala occasions. Decorations, crepe

streamers, booths, games—it was always one of the prime events of the year. I—as I mentioned to

McMurphy—was the chairman of the high-school carnival both my junior and senior years—

wonderful carefree years ...”

It’s got real quiet in the day room. The doctor raises his head, peers around to see if he’s making

a fool of himself. The Big Nurse is giving him a look that shouldn’t leave any doubts about it, but he

doesn’t have on his glasses and the look misses him.

“Anyway—to put an end to this maudlin display of nostalgia—in the course of our conversation

McMurphy and I wondered what would be the attitude of some of the men toward a carnival here

on the ward?”

He puts on his glasses and peers around again. Nobody’s jumping up and down at the idea. Some

of us can remember Taber trying to engineer a carnival a few years back, and what happened to it.

As the doctor waits, a silence rears up from out of the nurse and looms over everybody, daring

anybody to challenge it. I know McMurphy can’t because he was in on the planning of the carnival,

and just as I’m thinking that nobody will be fool enough to break that silence, Cheswick, who sits

right next to McMurphy, gives a grunt and is on his feet, rubbing his ribs, before he knows what

happened.

“Uh—I personally believe, see”—he looks down at McMurphy’s fist on the chair arm beside

him, with that big stiff thumb sticking straight up out of it like a cow prod—“that a carnival is a real

good idea. Something to break the monotony.”

“That’s right, Charley,” the doctor says, appreciating Cheswick’s support, “and not altogether

without therapeutic value.”

“Certainly not,” Cheswick says, looking happier now. “No. Lots of therapeutics in a carnival.

You bet.”

“It would b-b-be fun,” Billy Bibbit says.

“Yeah, that too,” Cheswick says. “We could do it, Doctor Spivey, sure we could. Scanlon can do

his human bomb act, and I can make a ring toss in Occupational Therapy.”

[98] “I’ll tell fortunes,” Martini says and squints at a spot above his head.

“I’m rather good at diagnosing pathologies from palm reading, myself,” Harding says.

“Good, good,” Cheswick says and claps his hands. He’s never had anybody support anything he

said before.

“Myself,” McMurphy drawls, “I’d be honored to work a skillo wheel. Had a little experience ...”

“Oh, there are numerous possibilities,” the doctor says, sitting up straight in his chair and really

warming to it. “Why, I’ve got a million ideas ...”

He talks full steam ahead for another five minutes. You can tell a lot of the ideas are ideas he’s

already talked over with McMurphy. He describes games, booths, talks of selling tickets, then stops

62

Ken Kesey one flew over the cuckoo’s nest

as suddenly as though the Nurse’s look had hit him right between the eyes. He blinks at her and

asks, “What do you think of the idea, Miss Ratched? Of a carnival? Here, on the ward?”

“I agree that it may have a number of therapeutic possibilities,” she says, and waits. She lets that

silence rear up from her again. When she’s sure nobody’s going to challenge it, she goes on. “But I

also believe that an idea like this should be discussed in staff meeting before a decision is reached.

Wasn’t that your idea, Doctor?”

“Of course. I merely thought, understand, I would feel out some of the men first. But certainly, a

staff meeting first. Then we’ll continue our plans.”

Everybody knows that’s all there is to the carnival.

The Big Nurse starts to bring things back into hand by rattling the folio she’s holding. “Fine.

Then if there is no other new business—and if Mr. Cheswick will be seated—I think we might go

right on into the discussion. We have”—she takes her watch from the basket and looks at it—

“forty-eight minutes left. So, as I—”

“Oh. Hey, wait. I remember there is some other new business.” McMurphy has his hand up,

fingers snapping. She looks at the hand for a long time before she says anything.

“Yes, Mr. McMurphy?”

“Not me, Doctor Spivey has. Doc, tell ‘em what you come up with about the hard-of-hearing

guys and the radio.”

The nurse’s head gives one little jerk, barely enough to see, but my heart is suddenly roaring. She

puts the folio back in the basket, turns to the doctor.

“Yes,” says the doctor. “I very nearly forgot.” He leans back and crosses his legs and puts his

fingertips together; I can see [99] he’s still in good spirits about his carnival. “You see, McMurphy

and I were talking about that age-old problem we have on this ward: the mixed population, the

young and the old together. It’s not the most ideal surroundings for our Therapeutic Community,

but Administration says there’s no helping it with the Geriatric Building overloaded the way it is. I’ll

be the first to admit it’s not an absolutely pleasant situation for anyone concerned. In our talk,

however, McMurphy and I did happen to come up with an idea which might make things more

pleasant for both age groups. McMurphy mentioned that he had noticed some of the old fellows

seemed to have difficulty hearing the radio. He suggested the speaker might be turned up louder so

the Chronics with auditory weaknesses could hear it. A very humane suggestion, I think.”

McMurphy gives a modest wave of his hand, and the doctor nods at him and goes on.

“But I told him I had received previous complaints from some of the younger men that the radio

is already so loud it hinders conversation and reading. McMurphy said he hadn’t thought of this, but

mentioned that it did seem a shame that those who wished to read couldn’t get off by themselves

where it was quiet and leave the radio for those who wished to listen. I agreed with him that it did

seem a shame and was ready to drop the matter when I happened to think of the old tub room

where we store the tables during the ward meeting. We don’t use the room at all otherwise; there’s

no longer a need for the hydrotherapy it was designed for, now that we have the new drugs. So how

would the group like to have that room as a sort of second day room, a game room, shall we say?”

The group isn’t saying. They know whose play it is next. She folds Harding’s folio back up and

puts it on her lap and crosses her hands over it, looking around the room just like somebody might

dare have something to say. When it’s clear nobody’s going to talk till she does, her head turns again

to the doctor. “It sounds like a fine plan, Doctor Spivey, and I appreciate Mr. McMurphy’s interest

in the other patients, but I’m terribly afraid we don’t have the personnel to cover a second day

room.”

And is so certain that this should be the end of it she starts to open the folio again. But the

doctor has thought this through more than she figured.

63

Ken Kesey one flew over the cuckoo’s nest

“I thought of that too, Miss Ratched. But since it will be largely the Chronic patients who remain

here in the day room with the speaker—most of whom are restricted to lounges or wheel chairs—

one aide and one nurse in here should easily be [100] able to put down any riots or uprisings that

might occur, don’t you think?”

She doesn’t answer, and she doesn’t care much for his joking about riots and uprisings either, but

her face doesn’t change. The smile stays.

“So the other two aides and nurses can cover the men in the tub room, perhaps even better than

here in a larger area. What do you think, men? Is it a workable idea? I’m rather enthused about it

myself, and I say we give it a try, see what it’s like for a few days. If it doesn’t work, well, we’ve still

got the key to lock it back up, haven’t we?”

“Right!” Cheswick says, socks his fist into his palm. He’s still standing, like he’s afraid to get near

that thumb of McMurphy’s again. “Right, Doctor Spivey, if it don’t work, we’ve still got the key to

lock it back up. You bet.”

The doctor looks around the room and sees all the other Acutes nodding and smiling and looking

so pleased with what he takes to be him and his idea that he blushes like Billy Bibbit and has to

polish his glasses a time or two before he can go on. It tickles me to see the little man so happy with

himself. He looks at all the guys nodding, and nods himself and says, “Fine, fine,” and settles his

hands on his knees. “Very good. Now. If that’s decided—I seem to have forgotten what we were

planning to talk about this morning?”

The nurse’s head gives that one little jerk again, and she bends over her basket, picks up a folio.

She fumbles with the papers, and it looks like her hands are shaking. She draws out a paper, but

once more, before she can start reading out of-it, McMurphy is standing and holding up his hand

and shifting from foot to foot, giving a long, thoughtful, “Saaaay,” and her fumbling stops, freezes

as though the sound of his voice froze her just like her voice froze that black boy this morning. I get

that giddy feeling inside me again when she freezes. I watch her close while McMurphy talks.

“Saaaaay, Doctor, what I been dyin’ to know is what did this dream I dreamt the other night

mean? You see, it was like I was me, in the dream, and then again kind of like I wasn’t me—like I was

somebody else that looked like me—like—like my daddy! Yeah, that’s who it was. It was my daddy

because sometimes when I saw me—him—I saw there was this iron bolt through the jawbone like

daddy used to have—”

“Your father has an iron bolt through his jawbone?”

“Well, not any more, but he did once when I was a kid. He went around for about ten months

with this big metal bolt going in here and coming out here! God, he was a regular [101] Frankenstein.

He’d been clipped on the jaw with a pole ax when he got into some kinda hassle with this pond man

at the logging mill—Hey! Let me tell you how that incident came about. …”

Her face is still calm, as though sbe had a cast made and painted to just the look she wants.

Confident, patient, and unruffled. No more little jerk, just that terrible cold face, a calm smile

stamped out of red plastic; a clean, smooth forehead, not a line in it to show weakness or worry; flat,

wide, painted-on green eyes, painted on with an expression that says I can wait, I might lose a yard

now and then but I can wait, and be patient and calm and confident, because I know there’s no real

losing for me.

I thought for a minute there I saw her whipped. Maybe I did. But I see now that it don’t make

any difference. One by one the patients are sneaking looks at her to see how she’s taking the way

McMurphy is dominating the meeting, and they see the same thing. She’s too big to be beaten. She

covers one whole side of the room like a Jap statue. There’s no moving her and no help against her.

She’s lost a little battle here today, but it’s a minor battle in a big war that she’s been winning and

that she’ll go on winning. We mustn’t let McMurphy get our hopes up any different, lure us into

making some kind of dumb play. She’ll go on winning, just like the Combine, because she has all the

64

Ken Kesey one flew over the cuckoo’s nest

power of the Combine behind her. She don’t lose on her losses, but she wins on ours. To beat her

you don’t have to whip her two out of three or three out of five, but every time you meet. As soon

as you let down your guard, as soon as you lose once, she’s won for good. And eventually we all got

to lose. Nobody can help that.

Right now, she’s got the fog machine switched on, and it’s rolling in so fast I can’t see a thing but

her face, rolling in thicker and thicker, and I feel as hopeless and dead as I felt happy a minute ago,

when she gave that little jerk—even more hopeless than ever before, on account of I know now

there is no real help against her or her Combine. McMurphy can’t help any more than I could.

Nobody can help. And the more I think about how nothing can be helped, the faster the fog rolls in.

And I’m glad when it gets thick enough you’re lost in it and can let go, and be safe again.

65

Ken Kesey one flew over the cuckoo’s nest

10

There’s a Monopoly game going on in the day room. They’ve been at it for three days, houses

and hotels everywhere, two tables pushed together to take care of all the deeds and stacks of play

money. McMurphy talked them into making the game interesting by paying a penny for every play

dollar the bank issues them; the monopoly box is loaded with change.

“It’s your roll, Cheswick.”

“Hold it a minute before he rolls. What’s a man need to buy thum hotels?”

“You need four houses on every lot of the same color, Martini. Now let’s go, for Christsakes.”

“Hold it a minute.”

There’s a flurry of money from that side of the table, red and green and yellow bills blowing in

every direction.

“You buying a hotel or you playing happy new year, for Christsakes?”

“It’s your dirty roll, Cheswick.”

“Snake eyes! Hoooeee, Cheswicker, where does that put you? That don’t put you on my Marvin

Gardens by any chance? That don’t mean you have to pay me, let’s see, three hundred and fifty

dollars?”

“Boogered.”

“What’s thum other things? Hold it a minute. What’s thum other things all over the board?”

“Martini, you been seeing them other things all over the board for two days. No wonder I’m

losing my ass. McMurphy, I don’t see how you can concentrate with Martini sitting there

hallucinating a mile a minute.”

“Cheswick, you never mind about Martini. He’s doing real good. You just come on with that

three fifty, and Martini will take care of himself; don’t we get rent from him every time one of his

‘things’ lands on our property?”

“Hold it a minute. There’s so many of thum.”

“That’s okay, Mart. You just keep us posted whose property they land on. You’re still the man

with the dice, Cheswick. You rolled a double, so you roll again. Atta boy. Faw! a big six.”

[103] “Takes me to ... Chance: ‘You Have Been Elected Chairman of the Board; Pay Every

Player—’ Boogered and double boogered!”

“Whose hotel is this here for Christsakes on the Reading Railroad?”

“My friend, that, as anyone can see, is not a hotel; it’s a depot.”

“Now hold it a minute—”

McMurphy surrounds his end of the table, moving cards, rearranging money, evening up his

hotels. There’s a hundred. dollar bill sticking out of the brim of his cap like a press card; mad

money, he calls it.

“Scanlon? I believe it’s your turn, buddy.”

“Gimme those dice. I’ll blow this board to pieces. Here we go. Lebenty Leben, count me over

eleven, Martini.”

“Why, all right.”

“Not that one, you crazy bastard; that’s not my piece, that’s my house.”

“It’s the same color.”

“What’s this little house doing on the Electric Company?”

“That’s a power station.”

“Martini, those ain’t the dice you’re shaking—”

“Let him be; what’s the difference?”

“Those are a couple of houses!”

66

Ken Kesey one flew over the cuckoo’s nest

“Faw. And Martini rolls a big, let me see, a big nineteen. Good goin’, Mart; that puts you—

Where’s your piece, buddy?”

“Eh? Why here it is.”

“He had it in his mouth, McMurphy. Excellent. That’s two moves over the second and third

bicuspid, four moves to the board, which takes you on to—to Baltic Avenue, Martini. Your own

and only property. How fortunate can a man get, friends? Martini has been playing three days and lit

on his property practically every time.”

“Shut up and roll, Harding. It’s your turn.”

Harding gathers the dice up with his long fingers, feeling the smooth surfaces with his thumb as

if he was blind. The fingers are the same color as the dice and look like they were carved by his other

hand. The dice rattle in his hand as he shakes it. They tumble to a stop in front of McMurphy.

“Faw. Five, six, seven. Tough luck, buddy. That’s another o’ my vast holdin’s. You owe me—oh,

two hundred dollars should about cover it.”

Pity.

The game goes round and round, to the rattle of dice and the shuffle of play money.

67

Ken Kesey one flew over the cuckoo’s nest

11

There’s long spells—three days, years—when you can’t see a thing, know where you are only by

the speaker sounding overhead like a bell buoy clanging in the fog. When I can see, the guys are

usually moving around as unconcerned as though they didn’t notice so much as a mist in the air. I

believe the fog affects their memory some way it doesn’t affect mine.

Even McMurphy doesn’t seem to know he’s been fogged in. If he does, he makes sure not to let

on that he’s bothered by it. He’s making sure none of the staff sees him bothered by anything; he

knows that there’s no better way in the world to aggravate somebody who’s trying to make it hard

for you than by acting like you’re not bothered.

He keeps up his high-class manners around the nurses and the black boys in spite of anything

they might say to him, in spite of every trick they pull to get him to lose his temper. A couple of

times some stupid rule gets him mad, but he just makes himself act more polite and mannerly than

ever till he begins to see how funny the whole thing is—the rules, the disapproving looks they use to

enforce the rules, the ways of talking to you like you’re nothing but a three-year-old—and when he

sees how funny it is he goes to laughing, and this aggravates them no end. He’s safe as long as he

can laugh, he thinks, and it works pretty fair. Just once he loses control and shows he’s mad, and

then it’s not because of the black boys or the Big Nurse and something they did, but it’s because of

the patients, and something they didn’t do.

It happened at one of the group meetings. He got mad at the guys for acting too cagey—too

chicken-shit, he called it. He’d been taking bets from all of them on the World Series coming up

Friday. He’d had it in mind that they would get to watch the games on TV, even though they didn’t

come on during regulation TV time. During the meeting a few days before he asks if it wouldn’t be

okay if they did the cleaning work at night, during TV time, and watched the games during the

afternoon. The nurse tells him no, which is about what he expected. She tells him how the schedule

has been set up for a [105] delicately balanced reason that would be thrown into turmoil by the

switch of routines.

This doesn’t surprise him, coming from the nurse; what does surprise him is how the Acutes act

when he asks them what they think of the idea. Nobody says a thing. They’re all sunk back out of

sight in little pockets of fog. I can barely see them.

“Now look here,” he tells them, but they don’t look. He’s been waiting for somebody to say

something, answer his question. Nobody acts like they’ve heard it. “Look here, damn it,” he says

when nobody moves, “there’s at least twelve of you guys I know of myself got a leetle personal

interest who wins these games. Don’t you guys care to watch them?”

“I don’t know, Mack,” Scanlon finally says, “I’m pretty used to seeing that six-o’clock news. And

if switching times would really mess up the schedule as bad as Miss Ratched says—”

“The hell with the schedule. You can get back to the bloody schedule next week, when the Series

is over. What do you say, buddies? Let’s take a vote on watching the TV during the afternoon instead

of at night. All those in favor?”

“Ay,” Cheswick calls out and gets to his feet.

“I mean all those in favor raise their hands. Okay, all those in favor?”

Cheswick’s hand comes up. Some of the other guys look around to see if there’s any other fools.

McMurphy can’t believe it.

“Come on now, what is this crap? I thought you guys could vote on policy and that sort of thing.

Isn’t that the way it is, Doc?”

The doctor nods without looking up.

“Okay then; now who wants to watch those games?”

68

Ken Kesey one flew over the cuckoo’s nest

Cheswick shoves his hand higher and glares around. Scanlon shakes his head and then raises his

hand, keeping his elbow on the arm of the chair. And nobody else. McMurphy can’t say a word.

“If that’s settled, then,” the nurse says, “perhaps we should get on with the meeting.”

“Yeah,” he says, slides down in his chair till the brim of his cap nearly touches his chest. “Yeah,

perhaps we should get on with the sonofabitchin’ meeting at that.”

“Yeah,” Cheswick says, giving all the guys a hard look and sitting down, “yeah, get on with the

godblessed meeting.” He nods stiffly, then settles his chin down on his chest, scowling. He’s pleased

to be sitting next to McMurphy, feeling brave like this. It’s the first time Cheswick ever had

somebody along with him on his lost causes.

[106] After the meeting McMurphy won’t say a word to any of them, he’s so mad and disgusted.

It’s Billy Bibbit who goes up to him.

“Some of us have b-been here for fi-fi-five years, Randle,” Billy says. He’s got a magazine rolled

up and is twisting at it with his hands; you can see the cigarette burns on the backs of his hands.

“And some of us will b-be here maybe th-that muh-muh-much longer, long after you’re g-g-gone,

long after this Wo-world Series is over. And ... don’t you see …” He throws down the magazine and

walks away. “Oh, what’s the use of it anyway.”

McMurphy stares after him, that puzzled frown knotting his bleached eyebrows together again.

He argues for the rest of the day with some of the other guys about why they didn’t vote, but

they don’t want to talk about it, so he seems to give up, doesn’t say anything about it again till the

day before the Series starts. “Here it is Thursday,” he says, sadly shaking his head.

He’s sitting on one of the tables in the tub room with his feet on a chair, trying to spin his cap

around one finger. Other Acutes mope around the room and try not to pay any attention to him.

Nobody’ll play poker or blackjack with him for money any more—after the patients wouldn’t vote

he got mad and skinned them so bad at cards that they’re all so in debt they’re scared to go any

deeper—and they can’t play for cigarettes because the nurse has started making the men keep their

cartons on the desk in the Nurses’ Station, where she doles them out one pack a day, says it’s for

their health, but everybody knows it’s to keep McMurphy from winning them all at cards. With no

poker or blackjack, it’s quiet in the tub room, just the sound of the speaker drifting in from the day

room. It’s so quiet you can hear that guy upstairs in Disturbed climbing the wall, giving out an

occasional signal, loo loo looo, a bored, uninterested sound, like a baby yells to yell itself to sleep.

“Thursday,” McMurphy says again.

“Looooo,” yells that guy upstairs.

“That’s Rawler,” Scanlon says, looking up at the ceiling. He don’t want to pay any attention to

McMurphy. “Rawler the Squawler. He came through this ward a few years back. Wouldn’t keep still

to suit Miss Ratched, you remember, Billy? Loo loo loo all the time till I thought I’d go nuts. What

they should do with that whole bunch of dingbats up there is toss a couple of grenades in the dorm.

They’re no use to anybody—”

[107] “And tomorrow is Friday,” McMurphy says. He won’t let Scanlon change the subject.

“Yeah,” Cheswick says, scowling around the room, “tomorrow is Friday.”

Harding turns a page of his magazine. “And that will make nearly a week our friend McMurphy

has been with us without succeeding in throwing over the government, is that what you’re saying,

Cheswickle? Lord, to think of the chasm of apathy in which we have fallen—a shame, a pitiful

shame.”

“The hell with that,” McMurphy says. “What Cheswick means is that the first Series game is

gonna be played on TV tomorrow, and what are we gonna be doin’? Mopping up this damned

nursery again.”

“Yeah,” Cheswick says. “Ol’ Mother Ratched’s Therapeutic Nursery.”

69

Ken Kesey one flew over the cuckoo’s nest

Against the wall of the tub room I get a feeling like a spy; the mop handle in my hands is made of

metal instead of wood (metal’s a better conductor) and it’s hollow; there’s plenty of room inside it to

hide a miniature microphone. If the Big Nurse is hearing this, she’ll really get Cheswick. I take a hard

ball of gum from my pocket and pick some fuzz off it and hold it in my mouth till it softens.

“Let me see again,” McMurphy says. “How many of you birds will vote with me if I bring up that

time switch again?”

About half the Acutes nod yes, a lot more than would really vote. He puts his hat back on his

head and leans his chin in his hands.

“I tell ya, I can’t figure it out. Harding, what’s wrong with you, for crying out loud? You afraid if

you raise your hand that old buzzard’ll cut it off.”

Harding lifts one thin eyebrow. “Perhaps I am; perhaps I am afraid she’ll cut it off if I raise it.”

“What about you, Billy? Is that what you’re scared of?” “No. I don’t think she’d d-d- do anything,

but”—he shrugs and sighs and climbs up on the big panel that controls the nozzles on the shower,

perches up there like a monkey”—but I just don’t think a vote wu-wu-would do any good. Not in

the l-long run. It’s just no use, M-Mack.”

“Do any good? Hooee! It’d do you birds some good just to get the exercise lifting that arm.”

“It’s still a risk, my friend. She always has the capacity to make things worse for us. A baseball

game isn’t worth the risk,” Harding says.

“Who the hell says so? Jesus, I haven’t missed a World Series in years. Even when I was in the

cooler one September they [108] let us bring in a TV and watch the Series, they’d of had a riot on

their hands if they hadn’t. I just may have to kick that damned door down and walk to some bar

downtown to see the game, just me and my buddy Cheswick.”

“Now there’s a suggestion with a lot of merit,” Harding says, tossing down his magazine. “Why

not bring that up for vote in group meeting tomorrow? ‘Miss Ratched, I’d like to move that the

ward be transported en masse to the Idle Hour for beer and television.’ ”

“I’d second the motion,” Cheswick says. “Damn right.”

“The hell with that in mass business,” McMurphy says. “I’m tired of looking at you bunch of old

ladies; when me and Cheswick bust outta here I think by God I’m gonna nail the door shut behind

me. You guys better stay behind; your mamma probably wouldn’t let you cross the street.”

“Yeah? Is that it?” Fredrickson has come up behind McMurphy. “You’re just going to raise one

of those big he-man boots of yours and kick down the door? A real tough guy.”

McMurphy don’t hardly look at Fredrickson; he’s learned that Fredrickson might act hard-boiled

now and then, but it’s an act that folds under the slightest scare.

“What about it, he-man,” Fredrickson keeps on, “are you going to kick down that door and show

us how tough you are?”

“No, Fred, I guess not I wouldn’t want to scuff up my boot”

“Yeah? Okay, you been talking so big, just how would you go about busting out of here?”

McMurphy takes a look around him. “Well, I guess I could knock the mesh outa one of these

windows with a chair when and if I took a notion. ...”

“Yeah? You could, could you? Knock it right out? Okay, let’s see you try. Come on, he-man, I’ll

bet you ten dollars you can’t do it.”

“Don’t bother trying, Mack,” Cheswick says. “Fredrickson knows you’ll just break a chair and

end up on Disturbed. The first day we arrived over here we were given a demonstration about these

screens. They’re specially made. A technician picked up a chair just like that one you’ve got your feet

on and beat the screen till the chair was no more than kindling wood. Didn’t hardly dent the

screen.”

70

Ken Kesey one flew over the cuckoo’s nest

“Okay then,” McMurphy says, taking a look around him. I can see he’s getting more interested. I

hope the Big Nurse isn’t hearing this; he’ll be up on Disturbed in an hour. “We need something

heavier. How about a table?”

“Same as the chair. Same wood, same weight.”

“All right, by God, let’s just figure out what I’d have to toss [109] through that screen to bust out.

And if you birds don’t think I’d do it if I ever got the urge, then you got another think coming.

Okay—something bigger’n a table or a chair … Well, if it was night I might throw that fat coon

through it; he’s heavy enough.”

“Much too soft,” Harding says. “He’d hit the screen and it would dice him like an eggplant.”

“How about one of the beds?”

“A bed is too big even if you could lift it. It wouldn’t go through the window.”

“I could lift it all right. Well, hell, right over there you are: that thing Billy’s sittin’ on. That big

control panel with all the handles and cranks. That’s hard enough, ain’t it? And it damn well should

be heavy enough.”

“Sure,” Fredrickson says. “That’s the same as you kicking your foot through the steel door at the

front.”

“What would be wrong with using the panel? It don’t look nailed down.”

“No, it’s not bolted—there’s probably nothing holding it but a few wires—but look at it, for

Christsakes.”

Everybody looks. The panel is steel and cement, half the size of one of the tables, probably

weighs four hundred pounds.

“Okay, I’m looking at it. It don’t look any bigger than hay bales I’ve bucked up onto truck beds.”

“I’m afraid, my friend, that this contrivance will weigh a bit more than your bales of hay.”

“About a quarter-ton more, I’d bet,” Fredrickson says.

“He’s right, Mack,” Cheswick says. “It’d be awful heavy.”

“Hell, are you birds telling me I can’t lift that dinky little gizmo?”

“My friend, I don’t recall anything about psychopaths being able to move mountains in addition

to their other noteworthy assets.”

“Okay, you say I can’t lift it. Well by God ...”

McMurphy hops off the table and goes to peeling off his green jacket; the tattoos sticking half

out of his T-shirt jump around the muscles on his arms.

“Then who’s willing to lay five bucks? Nobody’s gonna convince me I can’t do something till I

try it. Five bucks ...”

“McMurphy, this is as foolhardy as your bet about the nurse.”

“Who’s got five bucks they want to lose? You hit or you sit. ...”

The guys all go to signing liens at once; he’s beat them so many times at poker and blackjack they

can’t wait to get back [110] at him, and this is a certain sure thing. I don’t know what he’s driving at;

broad and big as he is, it’d take three of him to move that panel, and he knows it. He can just look at

it and see he probably couldn’t even tip it, let alone lift it. It’d take a giant to lift it off the ground.

But when the Acutes all get their IOUs signed, he steps up to the panel and lifts Billy Bibbit down

off it and spits in his big callused palms and slaps them together, rolls his shoulders.

“Okay, stand outa the way. Sometimes when I go to exertin’ myself I use up all the air nearby and

grown men faint from suffocation. Stand back. There’s liable to be crackin’ cement and flying steel.

Get the women and kids someplace safe. Stand back. ...”

“By golly, he might do it,” Cheswick mutters.

“Sure, maybe he’ll talk it off the floor,” Fredrickson says.

“More likely he’ll acquire a beautiful hernia,” Harding says. “Come now, McMurphy, quit acting

like a fool; there’s no man can lift that thing.”

71

Ken Kesey one flew over the cuckoo’s nest

“Stand back, sissies, you’re using my oxygen.”

McMurphy shifts his feet a few times to get a good stance, and wipes his hands on his thighs

again, then leans down and gets hold of the levers on each side of the panel. When he goes to

straining, the guys go to hooting and kidding him. He turns loose and straightens up and shifts his

feet around again.

“Giving up?” Fredrickson grins.

“Just limbering up. Here goes the real effort”—and grabs those levers again.

And suddenly nobody’s hooting at him any more. His arms commence to swell, and the veins

squeeze up to the surface. He clinches his eyes, and his lips draw away from his teeth. His head leans

back, and tendons stand out like coiled ropes running from his heaving neck down both arms to his

hands. His whole body shakes with the strain as he tries to lift something he knows he can’t lift,

something everybody knows he can’t lift.

But, for just a second, when we hear the cement grind at our feet, we think, by golly, he might do

it.

Then his breath explodes out of him, and he falls back limp against the wall. There’s blood on

the levers where he tore his hands. He pants for a minute against the wall with his eyes shut. There’s

no sound but his scraping breath; nobody’s saying a thing.

He opens his eyes and looks around at us. One by one he looks at the guys—even at me—then

he fishes in his pockets for all the IOUs he won the last few days at poker. He bends over [111] the

table and tries to sort them, but his hands are froze into red claws, and he can’t work the fingers.

Finally he throws the whole bundle on the floor—probably forty or fifty dollars’ worth from

each man—and turns to walk out of the tub room. He stops at the door and looks back at

everybody standing around.

“But I tried, though,” he says. “Goddammit, I sure as hell did that much, now, didn’t I?”

And walks out and leaves those stained pieces of paper on the floor for whoever wants to sort

through them.

72

Ken Kesey one flew over the cuckoo’s nest

12

A visiting doctor covered with gray cobwebs on his yellow skull is addressing the resident boys in

the staff room.

I come sweeping past him. “Oh, and what’s this here.” He gives me a look like I’m some kind of

bug. One of the residents points at his ears, signal that I’m deaf, and the visiting doctor goes on.

I push my broom up face to face with a big picture Public Relation brought in one time when it

was fogged so thick I didn’t see him. The picture is a guy fly-fishing somewhere in the mountains,

looks like the Ochocos near Paineville—snow on the peaks showing over the pines, long white

aspen trunks lining the stream, sheep sorrel growing in sour green patches. The guy is flicking his fly

in a pool behind a rock. It’s no place for a fly, it’s a place for a single egg on a number-six hook—

he’d do better to drift the fly over those riffles downstream.

There’s a path running down through the aspen, and I push my broom down the path a ways and

sit down on a rock and look back out through the frame at that visiting doctor talking with the

residents. I can see him stabbing some point in the palm of his hand with his finger, but I can’t hear

what he says because of the crash of the cold, frothy stream coming down out of the rocks. I can

smell the snow in the wind where it blows down off the peaks. I can see mole burrows humping

along under the grass and buffalo weed. It’s a real nice place to stretch your legs and take it easy.

You forget—if you don’t sit down and make the effort to think back—forget how it was at the

old hospital. They didn’t have nice places like this on the walls for you to climb into. They didn’t

have TV or swimming pools or chicken twice a month. They didn’t have nothing but walls and

chairs, confinement jackets it took you hours of hard work to get out of. They’ve learned a lot since

then. “Come a long way,” says fat-faced Public Relation. They’ve made life look very pleasant with

paint and decorations and chrome bathroom fixtures. “A man that would want to run away from a

place as nice as this,” says fat-faced Public Relation, “why, there’d be something wrong with him.”

[113] Out in the staff room the visiting authority is hugging his elbows and shivering like he’s

cold while he answers questions the resident boys ask him. He’s thin and meatless, and his clothes

flap around his bones. He stands there, hugging his elbows and shivering. Maybe he feels the cold

snow wind off the peaks too.

73

Ken Kesey one flew over the cuckoo’s nest

13

It’s getting hard to locate my bed at night, have to crawl around on my hands and knees feeling

underneath the springs till I find my gobs of gum stuck there: Nobody complains about all the fog. I

know why, now: as bad as it is, you can slip back in it and feel safe. That’s what McMurphy can’t

understand, us wanting to be safe. He keeps trying to drag us out of the fog, out in the open where

we’d be easy to get at.

74

Ken Kesey one flew over the cuckoo’s nest

14

There’s a shipment of frozen parts come Tin downstairs—hearts and kidneys and brains and the

like. I can hear them rumble into cold storage down the coal chute. A guy sitting in the room

someplace I can’t see is talking about a guy up on Disturbed killing himself. Old Rawler. Cut both

nuts off and bled to death, sitting right on the can in the latrine, half a dozen people in there with

him didn’t know it till he fell off to the floor, dead.

What makes people so impatient is what I can’t figure; all the guy had to do was wait.

75

Ken Kesey one flew over the cuckoo’s nest

15

I know how they work it, the fog machine. We had a whole platoon used to operate fog

machines around airfields overseas. Whenever intelligence figured there might be a bombing attack,

or if the generals had something secret they wanted to pull-out of sight, hid so good that even the

spies on the base couldn’t see what went on—they fogged the field.

It’s a simple rig: you got an ordinary compressor sucks water out of one tank and a special oil out

of another tank, and compresses them together, and from the black stem at the end of the machine

blooms a white cloud of fog that can cover a whole airfield in ninety seconds. The first thing I saw

when I landed in Europe was the fog those machines make. There were some interceptors close

after our transport, and soon as it hit ground the fog crew started up the machines. We could look

out the transport’s round, scratched windows and watch the jeeps draw the machines up close to the

plane and watch the fog boil out till it rolled across the field and stuck against the windows like wet

cotton.

You found your way off the plane by following a little referees’ horn the lieutenant kept blowing,

sounded like a goose honking. Soon as you were out of the hatch you couldn’t see no more than

maybe three feet in any direction. You felt like you were out on that airfield all by yourself. You were

safe from the enemy, but you were awfully alone. Sounds died and dissolved after a few yards, and

you couldn’t hear any of the rest of your crew, nothing but that little horn squeaking and honking

out of a soft furry whiteness so thick that your body just faded into white below the belt; other than

that brown shirt and brass buckle, you couldn’t see nothing but white, like from the waist down you

were being dissolved by the fog too.

And then some guy wandering as lost as you would all of a sudden be right before your eyes, his

face bigger and clearer than you ever saw a man’s face before in your life. Your eyes were working

so hard to see in that fog that when something did come in sight every detail was ten times as clear

as usual, so clear both of you had to look away. When a man showed [117] up you didn’t want to

look at his face and he didn’t want to look at yours, because it’s painful to see somebody so clear

that it’s like looking inside him, but then neither did you want to look away and lose him completely.

You had a choice: you could either strain and look at things that appeared in front of you in the fog,

painful as it might be, or you could relax and lose yourself.

When they first used that fog machine on the ward, one they bought from Army Surplus and hid

in the vents in the new place before we moved in, I kept looking at anything that appeared out of

the fog as long and hard as I could, to keep track of it, just like I used to do when they fogged the

airfields in Europe. Nobody’d be blowing a horn to show the way, there was no rope to hold to, so

fixing my eyes on something was the only way I kept from getting lost. Sometimes I got lost in it

anyway, got in too deep, trying to hide, and every time I did, it seemed like I always turned up at that

same place, at that same metal door with the row of rivets like eyes and no number, just like the

room behind that door drew me to it, no matter how hard I tried to stay away, just like the current

generated by the fiends in that room was conducted in a beam along the fog and pulled me back

along it like a robot. I’d wander for days in the fog, scared I’d never see another thing, then there’d

be that door, opening to show me the mattress padding on the other side to stop out the sounds, the

men standing in a line like zombies among shiny copper wires and tubes pulsing light, and the bright

scrape of arcing electricity. I’d take my place in the line and wait my turn at the table. The table

shaped like à cross, with shadows of a thousand murdered men printed on it, silhouette wrists and

ankles running under leather straps sweated green with use, a silhouette neck and head running up to

a silver band goes across the forehead. And a technician at the controls beside the table looking up

from his dials and down the line and pointing at me with a rubber glove. “Wait, I know that big

76

Ken Kesey one flew over the cuckoo’s nest

bastard there—better rabbit-punch him or call for some more help or something. He’s an awful case

for thrashing around.”

So I used to try not to get in too deep, for fear I’d get lost and turn up at the Shock Shop door. I

looked hard at anything that came into sight and hung on like a man in a blizzard hangs on a fence

rail. But they kept making the fog thicker and thicker, and it seemed to me that, no matter how hard

I tried, two or three times a month I found myself with that door opening in front of me to the acid

smell of sparks and [118] ozone. In spite of all I could do, it was getting tough to keep from getting

lost.

Then I discovered something: I don’t have to end up at that door if I stay still when the fog

comes over me and just keep quiet. The trouble was I’d been finding that door my own self because

I got scared of being lost so long and went to hollering so they could track me. In a way, I was

hollering for them to track me; I had figured that anything was better’n being lost for good, even the

Shock Shop. Now, I don’t know. Being lost isn’t so bad.

All this morning I been waiting for them to fog us in again. The last few days they been doing it

more and more. It’s my idea they’re doing it on account of McMurphy. They haven’t got him fixed

with controls yet, and they’re trying to catch him off guard. They can see he’s due to be a problem; a

half a dozen times already he’s roused Cheswick and Harding and some of the others to where it

looked like they might actually stand up to one of the black boys—but always, just the time it looked

like the patient might be helped, the fog would start, like it’s starting now.

I heard the compressor start pumping in the grill a few minutes back, just as the guys went to

moving tables out of the day room for the therapeutic meeting, and already the mist is oozing across

the floor so thick my pants legs are wet. I’m cleaning the windows in the door of the glass station,

and I hear the Big Nurse pick up the phone and call the doctor to tell him we’re just about ready for

the meeting, and tell him perhaps he’d best keep an hour free this afternoon for a staff meeting.

“The reason being,” she tells him, “I think it is past time to have a discussion of the subject of

Patient Randle McMurphy and whether he should be on this ward or not.” She listens a minute,

then tells him, “I don’t think it’s wise to let him go on upsetting the patients the way he has the last

few days.”

That’s why she’s fogging the ward for the meeting. She don’t usually do that. But now she’s going

to do something with McMurphy today, probably ship him to Disturbed. I put down my window

rag and go to my chair at the end of the line of Chronics, barely able to see the guys getting into

their chairs and the doctor coming through the door wiping his glasses like he thinks the blurred

look comes from his steamed lenses instead of the fog.

It’s rolling in thicker than I ever seen it before.

I can hear them out there, trying to go on with the meeting, talking some nonsense about Billy

Bibbit’s stutter and how it came about. The words come to me like through water, it’s so [119] thick.

In fact it’s so much like water it floats me right up out of my chair and I don’t know which end is up

for a while. Floating makes me a little sick to the stomach at first. I can’t see a thing. I never had it

so thick it floated me like this.

The words get dim and loud, off and on, as I float around, but as loud as they get, loud enough

sometimes I know I’m right next to the guy that’s talking, I still can’t see a thing.

I recognize Billy’s voice, stuttering worse than ever because he’s nervous. “… fuh-fuh-flunked

out of college be-be-cause I quit ROTC. I c-c-couldn’t take it. Wh-wh-wh-whenever the officer in

charge of class would call roll, call ‘Bibbit,’ I couldn’t answer. You were s-s-supposed to say heh—

heh—heh ... He’s choking on the word, like it’s a bone in his throat. I hear him swallow and start

again. “You were supposed to say, ‘Here sir,’ and I never c-c-could get it out.”

His voice gets dim; then the Big Nurse’s voice comes cutting from the left. “Can you recall, Billy,

when you first had speech trouble? When did you first stutter, do you remember?”

77

Ken Kesey one flew over the cuckoo’s nest

I can’t tell is he laughing or what. “Fir-first stutter? First stutter? The first word I said I st-stuttered: m-m-m-m-mamma.”

Then the talking fades out altogether: I never knew that to happen before. Maybe Billy’s hid

himself in the fog too. Maybe all the guys finally and forever crowded back into the fog.

A chair and me float past each other. It’s the first thing I’ve seen. It comes sifting out of the fog

off to my right, and for a few seconds it’s right beside my face, just out of my reach. I been

accustomed of late to just let things alone when they appear in the fog, sit still and not try to hang

on. But this time I’m scared, the way I used to be scared. I try with all I got to pull myself over to

the chair and get hold of it, but there’s nothing to brace against and all I can do is thrash the air, all I

can do is watch the chair come clear, clearer than ever before to where I can even make out the

fingerprint where a worker touched the varnish before it was dry, looming out for a few seconds,

then fading on off again. I never seen it where things floated around this way. I never seen it this

thick before, thick to where I can’t get down to the floor and get on my feet if I wanted to and walk

around. That’s why I’m so scared; I feel I’m going to float off someplace for good this time.

I see a Chronic float into sight a little below me. It’s old Colonel Matterson, reading from the

wrinkled scripture of that long yellow hand. I look close at him because I figure it’s the last time I’ll

ever see him. His face is enormous, almost more than I can bear. Every hair and wrinkle of him is

big, as though [120] I was looking at him with one of those microscopes. I see him so clear I see his

whole life. The face is sixty years of southwest Army camps, rutted by iron-rimmed caisson wheels,

worn to the bone by thousands of feet on two-day marches.

He holds out that long hand and brings it up in front of his eyes and squints into it, brings up his

other hand and underlines the words with a finger wooden and varnished the color of a gunstock by

nicotine. His voice as deep and slow and patient, and I see the words come out dark and heavy over

his brittle lips when he reads.

“No ... The flag is ... Ah-mer-ica. America is ... the plum. The peach. The wah-ter-mel-on.

America is ... the gumdrop. The pump-kin seed. America is ... tell-ah-vision.”

It’s true. It’s all wrote down on that yellow hand. I can read it along with him myself.

“Now ... The cross is ... Mex-i-co.” He looks up to see if I’m paying attention, and when he sees I

am he smiles at me and goes on. “Mexico is ... the wal-nut. The hazelnut. The ay-corn. Mexico is ...

the rain-bow. The rain-bow is ... wooden. Mexico is ... woo-den.”

I can see what he’s driving at. He’s been saying this sort of thing for the whole six years he’s been

here, but I never paid him any mind, figured he was no more than a talking statue, a thing made out

of bone and arthritis, rambling on and on with these goofy definitions of his that didn’t make a lick

of sense. Now, at last, I see what he’s saying. I’m trying to hold him for one last look to remember

him, and that’s what makes me look hard enough to understand. He pauses and peers up at me again

to make sure I’m getting it, and I want to yell out to him Yes, I see: Mexico is like the walnut; it’s

brown and hard and you feel it with your eye and it feels like the walnut! You’re making sense, old

man, a sense of your own. You’re not crazy the way they think. Yes ... I see ...

But the fog’s clogged my throat to where I can’t make a sound. As he sifts away I see him bend

back over that hand.

“Now ... The green sheep is ... Can-a-da. Canada is … the fir tree. The wheat field. The cal-en-dar

…”

I strain to see him drifting away. I strain so hard my eyes ache and I have to close them, and

when I open them again the colonel is gone. I’m floating by myself again, more lost than ever.

This is the time, I tell myself. I’m going for good.

There’s old Pete, face like a searchlight. He’s fifty yards off to my left, but I can see him plain as

though there wasn’t any fog at all. Or maybe he’s up right close and real small, I can’t [121] be sure.

He tells me once about how tired he is, and just his saying it makes me see his whole life on the

78

Ken Kesey one flew over the cuckoo’s nest

railroad, see him working to figure out how to read a watch, breaking a sweat while he tries to get

the right button in the right hole of his railroad overalls, doing his absolute damnedest to keep up

with a job that comes so easy to the others they can sit back in a chair padded with cardboard and

read mystery stories and girlie books. Not that he ever really figured to keep up—he knew from the

start he couldn’t do that—but he had to try to keep up, just to keep them in sight. So for forty years

he was able to live, if not right in the world of men, at least on the edge of it.

I can see all that, and be hurt by it, the way I was hurt by seeing things in the Army, in the war.

The way I was hurt by seeing what happened to Papa and the tribe. I thought I’d got over seeing

those things and fretting over them. There’s no sense in it. There’s nothing to be done.

“I’m tired,” is what he says.

“I know you’re tired, Pete, but I can’t do you no good fretting about it. You know I can’t.”

Pete floats on the way of the old colonel.

Here comes Billy Bibbit, the way Pete come by. They’re all filing by for a last look. I know Billy

can’t be more’n a few feet away, but he’s so tiny he looks like he’s a mile off. His face is out to me

like the face of a beggar, needing so much more’n anybody can give. His mouth works like a little

doll’s mouth.

“And even when I pr-proposed, I flubbed it. I said ‘Huh-honey, will you muh-muh-muh-muhmuh …’ till the girl broke out l-laughing.”

Nurse’s voice, I can’t see where it comes from: “Your mother has spoken to me about this girl,

Billy. Apparently she was quite a bit beneath you. What would you speculate it was about her that

frightened you so, Billy?”

“I was in luh-love with her.”

I can’t do nothing for you either, Billy. You know that. None of us can. You got to understand

that as soon as a man goes to help somebody, he leaves himself wide open. He has to be cagey, Billy,

you should know that as well as anyone. What could I do? I can’t fix your stuttering. I can’t wipe the

razorblade scars off your wrists or the cigarette burns off the back of your hands. I can’t give you a

new mother. And as far as the nurse riding you like this, rubbing your nose in your weakness till

what little dignity you got left is gone and you shrink up to nothing from humiliation, I can’t do

anything about that, either. At Anzio, I saw a buddy of mine tied to a tree fifty yards [122] from me,

screaming for water, his face blistered in the sun. They wanted me to try to go out and help him.

They’d of cut me in half from that farmhouse over there.

Put your face away, Billy.

They keep filing past.

It’s like each face was a sign like one of those “I’m Blind” signs the dago accordion players in

Portland hung around their necks, only these signs say “I’m tired” or “I’m scared” or “I’m dying of

a bum liver” or “I’m all bound up with machinery and people pushing me alla time.” I can read all the

signs, it don’t make any difference how little the print gets. Some of the faces are looking around at

one another and could read the other fellow’s if they would, but what’s the sense? The faces blow

past in the fog like confetti.

I’m further off than I’ve ever been. This is what it’s like to be dead. I guess this is what it’s like to

be a Vegetable; you lose yourself in the fog. You don’t move. They feed your body till it finally stops

eating; then they burn it. It’s not so bad. There’s no pain. I don’t feel much of anything other than a

touch of chill I figure will pass in time.

I see my commanding officer pinning notices on the bulletin board, what we’re to wear today. I

see the US Department of Interior bearing down on our little tribe with a gravel-crushing machine.

I see Papa come loping out of a draw and slow up to try and take aim at a big six-point buck

springing off through the cedars. Shot after shot puffs out of the barrel, knocking dust all around

79

Ken Kesey one flew over the cuckoo’s nest

the buck. I come out of the draw behind Papa and bring the buck down with my second shot just as

it starts climbing the rimrock. I grin at Papa.

I never knew you to miss a shot like that before, Papa. Eye’s gone, boy. Can’t hold a bead. Sights on my gun just

now was shakin’ like a dog shittin’ peach pits.

Papa, I’m telling you: that cactus moon of Sid’s is gonna make you old before your time.

A man drinks that cactus moon of Sid’s boy, he’s already old before his time. Let’s go gut that animal out before

the flies blow him.

That’s not even happening now. You see? There’s nothing you can do about a happening out of

the past like that.

Look there, my man …

I hear whispers, black boys.

Look there, that old fool Broom, slipped off to sleep.

Tha’s right, Chief Broom, tha’s right. You sleep an’ keep outta trouble. Yasss.

[123] I’m not cold any more. I think I’ve about made it. I’m off to where the cold can’t reach me.

I can stay off here for good. I’m not scared any more. They can’t reach me. Just the words reach me,

and those’re fading.

Wel .. in as much as Bil y has decided to walk out on the discussion, does anyone else have a problem to bring

before the group?

As a matter of fact, ma’am, there does happen to be something …

That’s that McMurphy. He’s far away. He’s still trying to pull people out of the fog. Why don’t he

leave me be?

“... remember that vote we had a day or so back-about the TV time? Well, today’s Friday and I

thought I might just bring it up again, just to see if anybody else has picked up a little guts.”

“Mr. McMurphy, the purpose of this meeting is therapy, group therapy, and I’m not certain these

petty grievances—”

“Yeah, yeah, the hell with that, we’ve heard it before. Me and some of the rest of the guys

decided—”

“One moment, Mr. McMurphy, let me pose a question to the group: do any of you feel that Mr.

McMurphy is perhaps imposing his personal desires on some of you too much? I’ve been thinking

you might be happier if he were moved to a different ward.”

Nobody says anything for a minute. Then someone says, “Let him vote, why dontcha? Why ya

want to ship him to Disturbed just for bringing up a vote? What’s so wrong with changing time?”

“Why, Mr. Scanlon, as I recall, you refused to eat for three days until we allowed you to turn the

set on at six instead of six-thirty.”

“A man needs to see the world news, don’t he? God, they coulda bombed Washington and it’d

been a week before we’d of heard.”

“Yes? And how do you feel about relinquishing your world news to watch a bunch of men play

baseball?”

“We can’t have both, huh? No, I suppose not. Well, what the dickens—I don’t guess they’ll

bomb us this week.” “Let’s let him have the vote, Miss Ratched.”

“Very well. But I think this is ample evidence of how much he is upsetting some of you patients.

What is it you are proposing, Mr. McMurphy?”

“I’m proposing a revote on watching the TV in the afternoon.”

[124] “You’re certain one more vote will satisfy you? We have more important things—”

“It’ll satisfy me. I just’d kind of like to see which of these birds has any guts and which doesn’t.”

“It’s that kind of talk, Doctor Spivey, that makes me wonder if the patients wouldn’t be more

content if Mr. McMurphy were moved.”

“Let him call the vote, why dontcha?”

80

Ken Kesey one flew over the cuckoo’s nest

“Certainly, Mr. Cheswick. A vote is now before the group. Will a show of hands be adequate, Mr.

McMurphy, or are you going to insist on a secret ballot?”

“I want to see the hands. I want to see the hands that don’t go up, too.”

“Everyone in favor of changing the television time to the afternoon, raise his hand.”

The first hand that comes up, I can tell, is McMurphy’s, because of the bandage where that

control panel cut into him when he tried to lift it. And then off down the slope I see them, other

hands coming up out of the fog. It’s like ... that big red hand of McMurphy’s is reaching into the fog

and dropping down and dragging the men up by their hands, dragging them blinking into the open.

First one, then another, then the next. Right on down the line of Acutes, dragging them out of the

fog till there they stand, all twenty of them, raising not just for watching TV, but against the Big

Nurse, against her trying to send McMurphy to Disturbed, against the way she’s talked and acted

and beat them down for years.

Nobody says anything. I can feel how stunned everybody is, the patients as well as the staff. The

nurse can’t figure what happened; yesterday, before he tried lifting that panel, there wasn’t but four

or five men might of voted. But when she talks she don’t let it show in her voice how surprised she

is.

“I count only twenty, Mr. McMurphy.”

“Twenty? Well, why not? Twenty is all of us there—” His voice hangs as he realizes what she

means. “Now hold on just a goddamned minute, lady—”

“I’m afraid the vote is defeated.”

“Hold on just one goddamned minute!”

“There are forty patients on the ward, Mr. McMurphy. Forty patients, and only twenty voted.

You must have a majority to change the ward policy. I’m afraid the vote is closed.”

The hands are coming down across the room. The guys know they’re whipped, are trying to slip

back into the safety of the fog. McMurphy is on his feet.

“Well, I’ll be a sonofabitch. You mean to tell me that’s how [125] you’re gonna pull it? Count the

votes of those old birds over there too?”

“Didn’t you explain the voting procedure to him, Doctor?”

“I’m afraid—a majority is called for, McMurphy. She’s right, she’s right.”

“A majority, Mr. McMurphy; it’s in the ward constitution.” “And I suppose the way to change

the damned constitution is with a majority vote. Sure. Of all the chicken-shit things I’ve ever seen,

this by God takes the cake!”

“I’m sorry, Mr. McMurphy, but you’ll find it written in the policy if you’d care for me to—”

“So this’s how you work this democratic bullshit—hell’s bells!”

“You seem upset, Mr. McMurphy. Doesn’t he seem upset, Doctor? I want you to note this.”

“Don’t give me that noise, lady. When a guy’s getting screwed he’s got a right to holler. And

we’ve been damn well screwed.”

“Perhaps, Doctor, in view of the patient’s condition, we should bring this meeting to a close early

today—”

“Wait! Wait a minute, let me talk to some of those old guys.”

“The vote is closed, Mr. McMurphy.”

“Let me talk to ‘em.”

He’s coming across the day room at us. He gets bigger and bigger, and he’s burning red in the

face. He reaches into the fog and tries to drag Ruckly to the surface because Ruckly’s the youngest.

“What about you, buddy? You want to watch the World Series? Baseball? Baseball games? Just

raise that hand up there—”

“Fffffffuck da wife.”

81

Ken Kesey one flew over the cuckoo’s nest

“All right, forget it. You, partner, how about you? What was your name—Ellis? What do you say,

Ellis, to watching a ball game on TV? Just raise your hand. ...”

Ellis’s hands are nailed to the wall, can’t be counted as a vote.

“I said the voting is closed, Mr. McMurphy. You’re just making a spectacle of yourself.”

He don’t pay any attention to her. He comes on down the line of Chronics. “C’mon, c’mon, just

one vote from you birds, just raise a hand. Show her you can still do it.”

“I’m tired,” says Pete and wags his head.

“The night is ... the Pacific Ocean.” The Colonel is reading off his hand, can’t be bothered with

voting.

“One of you guys, for cryin’ out loud! This is where you get [126] the edge, don’t you see that? We

have to do this—or we’re whipped! Don’t a one of you clucks know what I’m talking about enough to

give us a hand? You, Gabriel? George? No? You, Chief, what about you?

He’s standing over me in the mist. Why won’t he leave me be?

“Chief, you’re our last bet.”

The Big Nurse is folding her papers; the other nurses are standing up around her. She finally gets

to her feet.

“The meeting is adjourned, then, I hear her say. “And I’d like to see the staff down in the staff

room in about an hour. So, if there is nothing el—”

It’s too late to stop it now. McMurphy did something to it that first day, put some kind of hex on

it with his hand so it won’t act like I order it. There’s no sense in it, any fool can see; I wouldn’t do it

on my own. Just by the way the nurse is staring at me with her mouth empty of words I can see I’m

in for trouble, but I can’t stop it. McMurphy’s got hidden wires hooked to it, lifting it slow just to

get me out of the fog and into the open where I’m fair game. He’s doing it, wires ...

No. That’s not the truth. I lifted it myself.

McMurphy whoops and drags me standing, pounding my back.

“Twenty-one! The Chief’s vote makes it twenty-one! And by God if that ain’t a majority I’ll eat

my hat!”

“Yippee,” Cheswick yells. The other Acutes are coming across toward me.

“The meeting was closed,” she says. Her smile is still there, but the back of her neck as she walks

out of the day room and into the Nurses’ Station, is red and swelling like she’ll blow apart any

second.

But she don’t blow up, not right off, not until about an hour later. Behind the glass her smile is

twisted and queer, like we’ve never seen before. She just sits. I can see her shoulders rise and fall as

she breathes.

McMurphy looks up at the clock and he says it’s time for the game. He’s over by the drinking

fountain with some of the other Acutes, down on his knees scouring off the baseboard. I’m

sweeping out the broom closet for the tenth time that day. Scanlon and Harding, they got the buffer

going up and down the hall, polishing the new wax into shining figure eights. McMurphy says again

that he guesses it must be game time and he stands up, leaves the scouring rag where it lies. Nobody

else stops work. McMurphy walks past the window where she’s [127] glaring out at him and grins at

her like he knows he’s got her whipped now. When he tips his head back and winks at her she gives

that little sideways jerk of her head.

Everybody keeps on at what he’s doing, but they all watch out of the corners of their eyes while

he drags his armchair out to in front of the TV set, then switches on the set and sits down. A picture

swirls onto the screen of a parrot out on the baseball field singing razor-blade songs. McMurphy

gets up and turns up the sound to drown out the music coming down from the speaker in the

82

Ken Kesey one flew over the cuckoo’s nest

ceiling, and he drags another chair in front of him and sits down and crosses his feet on the chair

and leans back and lights a cigarette. He scratches his belly and yawns.

“Hoo- weee! Man, all I need me now is a can of beer and a red-hot.”

We can see the nurse’s face get red and her mouth work as she stares at him. She looks around

for a second and sees everybody’s watching what she’s going to do—even the black boys and the

little nurses sneaking looks at her, and the residents beginning to drift in for the staff meeting,

they’re watching. Her mouth clamps shut. She looks back at McMurphy and waits till the razor-blade

song is finished; then she gets up and goes to the steel door where the controls are, and she flips a

switch and the TV picture swirls back into the gray. Nothing is left on the screen but a little eye of

light beading right down on McMurphy sitting there.

That eye don’t faze him a bit. To tell the truth, he don’t even let on he knows the picture is

turned off; he puts his cigarette between his teeth and pushes his cap forward in his red hair till he

has to lean back to see out from under the brim.

And sits that way, with his hands crossed behind his head and his feet stuck out in a chair, a

smoking cigarette sticking out from under his hatbrim—watching the TV screen.

The nurse stands this as long as she can; then she comes to the door of the Nurses’ Station and

calls across to him he’d better help the men with the housework. He ignores her.

“I said, Mr. McMurphy, that you are supposed to be working during these hours.” Her voice has

a tight whine like an electric saw ripping through pine. “Mr. McMurphy, I’m warning you!”

Everybody’s stopped what he was doing. She looks around her, then takes a step out of the

Nurses’ Station toward McMurphy.

“You’re committed, you realize. You are ... under the jurisdiction of me ... the staff.” She’s holding

up a fist, all [128] those red-orange fingernails burning into her palm. “Under jurisdiction and

control—”

Harding shuts off the buffer, and leaves it in the hall, and goes pulls him a chair up alongside

McMurphy and sits down and lights him a cigarette too.

“Mr. Harding! You return to your scheduled duties!”

I think how her voice sounds like it hit a nail, and this strikes me so funny I almost laugh.

“Mr. Har- ding!”

Then Cheswick goes and gets him a chair, and then Billy Bibbit goes, and then Scanlon and then

Fredrickson and Sefelt, and then we all put down our mops and brooms and scouring rags and we

all go pull us chairs up.

“You men—Stop this. Stop!”

And we’re all sitting there lined up in front of that blanked-out TV set, watching the gray screen

just like we could see the baseball game clear as day, and she’s ranting and screaming behind us.

If somebody’d of come in and took a look, men watching a blank TV, a fifty-year-old woman

hollering and squealing at the back of their heads about discipline and order and recriminations,

they’d of thought the whole bunch was crazy as loons.

83

Ken Kesey one flew over the cuckoo’s nest

part 2

84

Ken Kesey one flew over the cuckoo’s nest

16

Just at the edge of my vision I can see that white enamel face in the Nurses’ Station, teetering

over the desk, see it warp and flow as it tries to pull back into shape. The rest of the guys are

watching too, though they’re trying to act like they aren’t. They’re trying to act like they still got their

eyes on nothing but that blank TV in front of us, but anyone can see they’re all sneaking looks at the

Big Nurse behind her glass there, just the same as I am. For the first time she’s on the other side of

the glass and getting a taste of how it feels to be watched when you wish more than anything else to

be able to pull a green shade between your face and all the eyes that you can’t get away from.

The residents, the black boys, all the little nurses, they’re watching her too, waiting for her to go

down the hall where it’s time for the meeting she herself called, and waiting to see how she’ll act

now that it’s known she can be made to lose control. She knows they’re watching, but she don’t

move. Not even when they start strolling down to the staff room without her. I notice all the

machinery in the wall is quiet, like it’s still waiting for her to move.

[130] There’s no more fog any place.

All of a sudden I remember I’m supposed to clean the staff room. I always go down and clean

the staff room during these meetings they have, been doing it for years. But now I’m too scared to

get out of my chair. The staff always let me clean the room because they didn’t think I could hear,

but now that they saw me lift my hand when McMurphy told me to, won’t they know I can hear?

Won’t they figure I been hearing all these years, listening to secrets meant only for their ears? What’ll

they do to me in that staff room if they know that?

Still, they expect me to be in there. If I’m not, they’ll know for sure that I can hear, be way ahead

of me, thinking, You see? He isn’t in here cleaning, don’t that prove it? It’s obvious what’s to be

done. …

I’m just getting the full force of the dangers we let ourselves in for when we let McMurphy lure

us out of the fog.

There’s a black boy leaning against the wall near the door, arms crossed, pink tongue tip darting

back and forth over his lips, watching us sitting in front of the TV set. His eyes dart back and forth

like his tongue and stop on me, and I see his leather eyelids raise a little. He watches me for a long

time, and I know he’s wondering about the way I acted in the group meeting. Then he comes off the

wall with a lurch, breaking contact, and goes to the broom closet and brings back a bucket of soapy

water and a sponge, drags my arms up and hangs the bucket bale over it, like hanging a kettle on a

fireplace boom.

“Le’s go, Chief,” he says. “Le’s get up and get to your duties.”

I don’t move. The bucket rocks on my arm. I don’t make a sign I heard. He’s trying to trick me.

He asks me again to get up, and when I don’t move he rolls his eyes up to the ceiling and sighs,

reaches down and takes my collar, and tugs a little, and I stand up. He stuffs the sponge in my

pocket and points up the hall where the staff room is, and I go.

And while I’m walking up the hall with the bucket, zoom, the Big Nurse comes past me with all

her old calm speed and power and turns into the door. That makes me wonder.

Out in the hall all by myself, I notice how clear it is—no fog any place. It’s a little cold where the

nurse just went past, and the white tubes in the ceiling circulate frozen light like rods of glowing ice,

like frosted refrigerator coils rigged up to glow white. The rods stretch down to the staff-room door

where the nurse just turned in at the end of the hall—a heavy steel door like the door of the Shock

Shop in Building One, except there are numbers printed on this one, and this one has a little glass

[131] peephole up head-high to let the staff peek out at who’s knocking. As I get closer I see there’s

light seeping out this peephole, green light, bitter as bile. The staff meeting is about to start in there,

85

Ken Kesey one flew over the cuckoo’s nest

is why there’s this green seepage; it’ll be all over the walls and windows by the time the meeting is

halfway through, for me to sponge off and squeeze in my bucket, use the water later to clear the

drains in the latrine.

Cleaning the staff room is always bad. The things I’ve had to clean up in these meetings

nobody’d believe; horrible things, poisons manufactured right out of skin pores and acids in the air

strong enough to melt a man. I’ve seen it.

I been in some meetings where the table legs strained and contorted and the chairs knotted and

the walls gritted against one another till you could of wrung sweat out the room. 1 been in meetings

where they kept talking about a patient so long that the patient materialized in the flesh, nude on the

coffee table in front of them, vulnerable to any fiendish notion they took; they’d have him smeared

around in an awful mess before they were finished.

That’s why they have me at the staff meetings, because they can be such a messy affair and

somebody has to clean up, and since the staff room is open only during the meetings it’s got to be

somebody they think won’t be able to spread the word what’s going on. That’s me. I been at it so

long, sponging and dusting and mopping this staff room and the old wooden one at the other place,

that the staff usually don’t even notice me; I move around in my chores, and they see right through

me like I wasn’t there—the only thing they’d miss if I didn’t show up would be the sponge and the

water bucket floating around.

But this time when I tap at the door and the Big Nurse looks through the peephole she looks

dead at me, and she takes longer than ordinary unlocking that door to let me in. Her face has come

back into shape, strong as ever, it seems to me. Everybody else goes ahead spooning sugar in their

coffee and borrowing cigarettes, the way they do before every meeting, but there’s a tenseness in the

air. I think it’s because of me at first. Then I notice that the Big Nurse hasn’t even sat down, hasn’t

even bothered to get herself a cup of coffee.

She lets me slip through the door and stabs me again with both eyes as I go past her, closes that

door when I’m in and locks it, and pivots around and glares at me some more. I know she’s

suspicious. I thought she might be too upset by the way McMurphy defied her to pay any attention

to me, but she don’t look shook at all. She’s clear-headed and wondering now just how did Mr.

Bromden hear that Acute McMurphy asking [132] him to raise his hand on that vote? She’s

wondering how did he know to lay down his mop and go sit with the Acutes in front of that TV set?

None of the other Chronics did that. She’s wondering if it isn’t time we did some checking on our

Mr. Chief Bromden.

I put my back to her and dig into the corner with my sponge. I lift the sponge up above my head

so everybody in the room can see how it’s covered with green slime and how hard I’m working; then

I bend over and rub harder than ever. But hard as I work and hard as I try to act like I’m not aware

of her back there, I can still feel her standing at the door and drilling into my skull till in a minute

she’s going to break through, till I’m just about to give up and yell and tell them everything if she

don’t take those eyes off me.

Then she realizes that she’s being stared at too—by all the rest of the staff. Just like she’s

wondering about me, they are wondering about her and what she’s planning to do about that

redhead back down there in the day room. They’re watching to see what she’ll say about him, and

they don’t care anything about some fool Indian on his hands and knees in the corner. They’re

waiting for her so she quits looking at me and goes and draws a cup of coffee and sits down, stirs

sugar in it so careful the spoon never touches the side of the cup.

It’s the doctor who starts things off. “Now, people, if we can get things rolling?”

He smiles around at the residents sipping coffee. He’s trying not to look at the Big Nurse. She’s

sitting there so silent it makes him nervous and fidgety. He grabs out his glasses and puts them on

for a look at his watch, goes to winding it while he talks.

86

Ken Kesey one flew over the cuckoo’s nest

“Fifteen after. It’s past time we started. Now. Miss Ratched, as most of you know, called this gettogether. She phoned me before the Therapeutic Community meeting and said that in her opinion

McMurphy was due to constitute a disturbance on the ward. Ever so intuitive, considering what

went on a few minutes ago, don’t you think?”

He stops winding his watch on account of it’s tight enough another twist is going to spray it all

over the place, and he sits there smiling at it, drumming the back of his hand with pink little fingers,

waiting. Usually at about this point in the meeting she’ll take over, but she doesn’t say anything.

“After today,” the doctor goes on, “no one can say that this is an ordinary man we’re dealing

with. No, certainly not. And he is a disturbing factor, that’s obvious. So—ah—as I see it, our course

in this discussion is to decide what action to take [133] in dealing with him. I believe the nurse called

this meeting—correct me if I’m off base here, Miss Ratched—to talk the situation out and unify the

staff’s opinion of what should be done about Mr. McMurphy?”

He gives her a pleading look, but she still doesn’t say anything. She’s lifted her face toward the

ceiling, checking for dirt most likely, and doesn’t appear to have heard a thing he’s been saying.

The doctor turns to the line of residents across the room; all of them got the same leg crossed

and coffee cup on the same knee. “You fellows,” the doctor says, “I realize you haven’t had

adequate time to arrive at a proper diagnosis of the patient, but you have had a chance at observing

him in action. What do you think?”

The question pops their heads up. Cleverly, he’s put them on the carpet too. They all look from

him to the Big Nurse. Some way she has regained all her old power in a few short minutes. Just

sitting there, smiling up at the ceiling and not saying anything, she has taken control again and made

everyone aware that she’s the force in here to be dealt with. If these boys don’t play it just right

they’re liable to finish their training up in Portland at the alky hospital. They begin to fidget around

like the doctor.

“He’s quite a disturbing influence, all right.” The first boy plays it safe.

They all sip their coffee and think about that. Then the next one says, “And he could constitute

an actual danger.”

“That’s true, that’s true,” the doctor says.

The boy thinks he may have found the key and goes on. “Quite a danger, in fact,” he says and

moves forward in his chair. “Keep in mind that this man performed violent acts for the sole purpose

of getting away from the work farm and into the comparative luxury of this hospital.”

“Planned violent acts,” the first boy says.

And the third boy mutters, “Of course, the very nature of this plan could indicate that he is

simply a shrewd con man, and not mentally ill at all.”

He glances around to see how this strikes her and sees she still hasn’t moved or given any sign.

But the rest of the staff sits there glaring at him like he’s said some awful vulgar thing. He sees how

he’s stepped way out of bounds and tries to bring it off as a joke by giggling and adding, “You

know, like ‘He Who Marches Out Of Step Hears Another Drum’ ”—but it’s too late. The first

resident turns on him after setting down his [134] cup of coffee and reaching in his pocket for a pipe

big as your fist.

“Frankly, Alvin,” he says to the third boy, “I’m disappointed in you. Even if one hadn’t read his

history all one should need to do is pay attention to his behavior on the ward to realize how absurd

the suggestion is. This man is not only very very sick, but I believe he is definitely a Potential

Assaultive. I think that is what Miss Ratched was suspecting when she called this meeting. Don’t you

recognize the arch type of psychopath? I’ve never heard of a clearer case. This man is a Napoleon, a

Genghis Khan, Attila the Hun.”

Another one joins in. He remembers the nurse’s comments about Disturbed. “Robert’s right,

Alvin. Didn’t you see the way the man acted out there today? When one of his schemes was

87

Ken Kesey one flew over the cuckoo’s nest

thwarted he was up out of his chair, on the verge of violence. You tell us, Doctor Spivey, what do

his records say about violence?”

“There is a marked disregard for discipline and authority,” the doctor says.

“Right. His history shows, Alvin, that time and again he has acted out his hostilities against

authority figures—in school, in the service, in jail! And I think that his performance after the voting

furor today is as conclusive an indication as we can have of what to expect in the future.” He stops

and frowns into his pipe, puts it back in his mouth, and strikes a match and sucks the flame into the

bowl with a loud popping sound. When it’s lit he sneaks a look up through the yellow cloud of

smoke at the Big Nurse; he must take her silence as agreement because he goes on, more

enthusiastic and certain than before.

“Pause for a minute and imagine, Alvin,” he says, his words cottony with smoke, “imagine what

will happen to one of us when we’re alone in Individual Therapy with Mr. McMurphy. Imagine you

are approaching a particularly painful breakthrough and he decides he’s just had all he can take of

your—how would he put it?—your ‘damn fool collitch-kid pryin’!’ You tell him he mustn’t get

hostile and he says ‘to hell with that,’ and tell him to calm down, in an authoritarian voice, of course,

and here he comes, all two hundred and ten red-headed psychopathic Irishman pounds of him, right

across the interviewing table at you. Are you—are any of us, for that matter—prepared to deal with

Mr. McMurphy when these moments arise?”

He puts his size-ten pipe back in the corner of his mouth and spreads his hands on his knees and

waits. Everybody’s thinking about McMurphy’s thick red arms and scarred hands [135] and how his

neck comes out of his T-shirt like a rusty wedge. The resident named Alvin has turned pale at the

thought, like that yellow pipe smoke his buddy was blowing at him had stained his face.

“So you believe it would be wise,” the doctor asks, “to send him up to Disturbed?”

“I believe it would be at the very least safe,” the guy with the pipe answers, closing his eyes.

“I’m afraid I’ll have to withdraw my suggestion and go along with Robert,” Alvin tells them all,

“if only for my own protection.”

They all laugh. They’re all more relaxed now, certain they’ve come round to the plan she was

wanting. They all have a sip of coffee on it except the guy with the pipe, and he has a big to-do with

the thing going out all the time, goes through a lot of matches and sucking and puffing and popping

of his lips. It finally smokes up again to suit him, and he says, a little proudly, “Yes, Disturbed Ward

for ol’ Red McMurphy, I’m afraid. You know what I think, observing him these few days?”

“Schizophrenic reaction?” Alvin asks.

Pipe shakes his head.

“Latent Homosexual with Reaction Formation?” the third one says.

Pipe shakes his head again and shuts his eyes. “No,” he says and smiles round the room, “Negative

Oedipal.”

They all congratulate him.

“Yes, I think there is a lot pointing to it,” he says. “But whatever the final diagnosis is, we must

keep one thing in mind: we’re not dealing with an ordinary man.”

“You—are very, very wrong, Mr. Gideon.” It’s the Big Nurse.

Everybody’s head jerks toward her—mine too, but I check myself and pass the motion off like

I’m trying to scrub a speck I just discovered on the wall above my head. Everybody’s confused all to

hell for sure now. They figured they were proposing just what she’d want, just what she was

planning to propose in the meeting herself. I thought so too. I’ve seen her send men half the size of

McMurphy up to Disturbed for no more reason than there was a chance they might spit on

somebody; now she’s got this bull of a man who’s bucked her and everybody else on the staff, a guy

she all but said was on his way off the ward earlier this afternoon, and she says no.

88

Ken Kesey one flew over the cuckoo’s nest

“No. I don’t agree. Not at all.” She smiles around at all of them. “I don’t agree that he should be

sent up to Disturbed, which would simply be an easy way of passing our problem on [136] to

another ward, and I don’t agree that he is some kind of extraordinary being—some kind of ‘super’

psychopath.”

She waits but nobody is about to disagree. For the first time she takes a sip of her coffee; the cup

comes away from her mouth with that red-orange color on it. I stare at the rim of the cup in spite of

myself; she couldn’t be wearing lipstick that color. That color on the rim of the cup must be from

heat, touch of her lips set it smoldering.

“I’ll admit that my first thought when I began to recognize Mr. McMurphy for the disturbing

force that he is was that he should most definitely be sent up to Disturbed. But now I believe.it is

too late. Would removing him undo the harm that he has done to our ward? I don’t believe it would,

not after this afternoon. I believe if he were sent to Disturbed now it would be exactly what the

patients would expect. He would be a martyr to them. They would never be given the opportunity to

see that this man is not an—as you put it, Mr. Gideon—‘extraordinary person.’ ”

She takes another sip and sets the cup on the table; the whack of it sounds like a gavel; all three

residents sit bold upright.

“No. He isn’t extraordinary. He is simply a man and no more, and is subject to all the fears and

all the cowardice and all the timidity that any other man is subject to. Given a few more days, I have

a very strong feeling that he will prove this, to us as well as the rest of the patients. If we keep him

on the ward I am certain his brashness will subside, his self-made rebellion will dwindle to nothing,

and”—she smiles, knowing something nobody else does—“that our redheaded hero will cut himself

down to something the patients will all recognize and lose respect for: a braggart and a blowhard of

the type who may climb up on a soapbox and shout for a following, the way we’ve all seen Mr.

Cheswick do, then back down the moment there is any real danger to him personally.”

“Patient McMurphy”—the boy with the pipe feels he should try to defend his position and save

face just a little bit “does not strike me as a coward.”

I expect her to get mad, but she doesn’t; she just gives him that let’s-wait-and-see look and says,

“I didn’t say he was exactly a coward, Mr. Gideon; oh, no. He’s simply very fond of someone. As a

psychopath, he’s much too fond of a Mr. Randle Patrick McMurphy to subject him to any needless

danger.” She gives the boy a smile that puts his pipe out for sure this time. “If we just wait for a

while, our hero will—what is it you college boys say?—give up his bit? Yes?”

[137] “But that may take weeks—” the boy starts.

“We have weeks,” she says. She stands up, looking more pleased with herself than I’ve seen her

look since McMurphy came to trouble her a week ago. “We have weeks, or months, or even years if

need be. Keep in mind that Mr. McMurphy is committed. The length of time he spends in this

hospital is entirely up to us. Now, if there is nothing else ...”

89

Ken Kesey one flew over the cuckoo’s nest

17

The way the Big Nurse acted so confident in that staff meeting, that worried me for a while, but

it didn’t make any difference to McMurphy. All weekend, and the next week, he was just as hard on

her and her black boys as he ever was, and the patients were loving it. He’d won his bet; he’d got the

nurse’s goat the way he said he would, and had collected on it, but that didn’t stop him from going

right ahead and acting like he always had, hollering up and down the hall, laughing at the black boys,

frustrating the whole staff, even going so far as to step up to the Big Nurse in the hall one time and

ask her, if she didn’t mind tellin’, just what was the actual inch-by-inch measurement on them great

big of breasts that she did her best to conceal but never could. She walked right on past, ignoring

him just like she chose to ignore the way nature had tagged her with those outsized badges of

femininity, just like she was above him, and sex, and everything else that’s weak and of the flesh.

When she posted work assignments on the bulletin board, and he read that she’d given him

latrine duty, he went to her office and knocked on that window of hers and personally thanked her

for the honor, and told her he’d think of her every time he swabbed out a urinal. She told him that

wasn’t necessary; just do his work and that would be sufficient, thank you.

The most work he did on them was to run a brush around the bowls once or twice apiece,

singing some song as loud as he could in time to the swishing brush; then he’d splash in some

Clorox and he’d be through. “That’s clean enough,” he’d tell the black boy who got after him for the

way he hurried through his job, “maybe not clean enough for some people, but myself I plan to piss

in ‘em, not eat lunch out of ‘em.” And when the Big Nurse gave in to the black boy’s frustrated

pleading and came in to check McMurphy’s cleaning assignment personally, she brought a little

compact mirror and she held it under the rim of the bowls. She walked along shaking her head and

saying, “Why, this is an outrage … an outrage …” at every bowl. McMurphy sidled right along

beside her, winking down his nose and saying in answer, “No; that’s a toilet bowl ... a toilet bowl.”

[139] But she didn’t lose control again, or even act at all like she might. She would get after him

about the toilets, using that same terrible, slow, patient pressure she used on everybody, as he stood

there in front of her, looking like a little kid getting a bawling out, hanging his head, and the toe of

one boot on top of the other, saying, “I try and try, ma’am, but I’m afraid I’ll never make my mark as

head man of the crappers.”

Once he wrote something on a slip of paper, strange writing that looked like a foreign alphabet,

and stuck it up under one of those toilet bowl rims with a wad of gum; when she came to that toilet

with her mirror she gave a short gasp at what she read reflected and dropped her mirror in the toilet.

But she didn’t lose control. That doll’s face and that doll’s smile were ‘ forged in confidence. She

stood up from the toilet bowl and gave him a look that would peel paint and told him it was his job

to make the latrine cleaner, not dirtier.

Actually, there wasn’t much cleaning of any kind getting done on the ward. As soon as it came

time in the afternoon when the schedule called for house duties, it was also time for the baseball

games to be on TV, and everybody went and lined the chairs up in front of the set and they didn’t

move out of them until dinner. It didn’t make any difference that the power was shut off in the

Nurses’ Station and we couldn’t see a thing but that blank gray screen, because McMurphy’d

entertain us for hours, sit and talk and tell all kinds of stories, like how he made a thousand dollars in

one month driving truck for a gyppo outfit and then lost every penny of it to some Canadian in an

ax-throwing contest, or how he and a buddy slick-tongued a guy into riding a brahma bull at a rodeo

in Albany, into riding him while he wore a blindfold: “Not the bull, I mean, the guy had on the

blindfold.” They told the guy that the blindfold would keep him from getting dizzy when the bull

went to spinning; then, when they got a bandanna wrapped around his eyes to where he couldn’t

90

Ken Kesey one flew over the cuckoo’s nest

see, they set him on that bull backward. McMurphy told it a couple of times and slapped his thigh

with his hat and laughed everytime he remembered it. “Blindfolded and backwards ... And I’m a

sonofagun if he didn’t stay the limit and won the purse. And I was second; if he’d been throwed I’d

of took first and a neat little purse. I swear the next time I pull a stunt like that I’ll blindfold the

damn bull instead.”

Whack his leg and throw back his head and laugh and laugh, digging his thumb into the ribs of

whoever was sitting next to him, trying to get him to laugh too.

There was times that week when I’d hear that full-throttled [140] laugh, watch him scratching his

belly and stretching and yawning and leaning back to wink at whoever he was joking with,

everything coming to him just as natural as drawing breath, and I’d quit worrying about the Big

Nurse and the Combine behind her. I’d think he was strong enough being his own self that he

would never back down the way she was hoping he would. I’d think, maybe he truly is something

extraordinary. He’s what he is, that’s it. Maybe that makes him strong enough, being what he is. The

Combine hasn’t got to him in all these years; what makes that nurse think she’s gonna be able to do

it in a few weeks? He’s not gonna let them twist him and manufacture him.

And later, hiding in the latrine from the black boys, I’d take a look at my own self in the mirror

and wonder how it was possible that anybody could manage such an enormous thing as being what

he was. There’d be my face in the mirror, dark and hard with big, high cheekbones like the cheek

underneath them had been hacked out with a hatchet, eyes all black and hard and mean-looking, just

like Papa’s eyes or the eyes of all those tough, mean-looking Indians you see on TV, and I’d think,

That ain’t me, that ain’t my face. It wasn’t even me when I was trying to be that face. I wasn’t even

really me then; I was just being the way I looked, the way people wanted. It don’t seem like I ever

have been me. How can McMurphy be what he is?

I was seeing him different than when he first came in; I was seeing more to him than just big

hands and red sideburns and a broken-nosed grin. I’d see him do things that didn’t fit with his face

or hands, things like painting a picture at OT with real paints on a blank paper with no lines or

numbers anywhere on it to tell him where to paint, or like writing letters to somebody in a beautiful

flowing hand. How could a man who looked like him paint pictures or write letters to people, or be

upset and worried like I saw him once when he got a letter back? These were the kind of things you

expected from Billy Bibbit or Harding. Harding had hands that looked like they should have done

paintings, though they never did; Harding trapped his hands and forced them to work sawing planks

for doghouses. McMurphy wasn’t like that. He hadn’t let what he looked like run his life one way or

the other, any more than he’d let the Combine mill him into fitting where they wanted him to fit.

I was seeing lots of things different. I figured the fog machine had broke down in the walls when

they turned it up too high for that meeting on Friday, so now they weren’t able to [141] circulate fog

and gas and foul up the way things looked. For the first time in years 1 was seeing people with none

of that black outline they used to have, and one night I was even able to see out the windows.

Like I explained, most nights before they ran me to bed they gave me this pill, knocked me out

and kept me out. Or if something went haywire with the dose and I woke up, my eyes were all

crusted over and the dorm was full of smoke, wires in the walls loaded to the limit, twisting and

sparking death and hate in the air—all too much for me to take so I’d ram my head under the pillow

and try to get back to sleep. Every time I peeked back out there would be the smell of burning hair

and a sound like sidemeat on a hot griddle.

But this one night, a few nights after the big meeting, I woke up and the dorm was clean and

silent; except for the soft breathing of the men and the stuff rattling around loose under the brittle

ribs of the two old Vegetables, it was dead quiet. A window was up, and the air in the dorm was

clear and had a taste to it made me feel kind of giddy and drunk, gave me this sudden yen to get up

out of bed and do something.

91

Ken Kesey one flew over the cuckoo’s nest

I slid from between the sheets and walked barefoot across the cold tile between the beds. I felt

the tile with my feet and wondered how many times, how many thousand times, had I run a mop

over this same tile floor and never felt it at all. That mopping seemed like a dream to me, like I

couldn’t exactly believe all those years of it had really happened. Only that cold linoleum under my

feet was real right then, only that moment.

I walked among the guys heaped in long white rows like snowbanks, careful not to bump into

somebody, till I came to the wall with the windows. I walked down the windows to one where the

shade popped softly in and out with the breeze, and I pressed my forehead up against the mesh. The

wire was cold and sharp, and I rolled my head against it from side to side to feel it with my cheeks,

and I smelled the breeze. It’s fall coming, I thought, I can smell that sour-molasses smell of silage,

clanging the air like a bell—smell somebody’s been burning oak leaves, left them to smolder

overnight because they’re too green.

It’s fall coming, I kept thinking, fall coming; just like that was the strangest thing ever happened.

Fall. Right outside here it was spring a while back, then it was summer, and now it’s fall—that’s sure

a curious idea.

I realized I still had my eyes shut. I had shut them when I put my face to the screen, like I was

scared to look outside. Now I had to open them. I looked out the window and saw for [142] the first

time how the hospital was out in the country. The moon was ‘low in the sky over the pastureland;

the face of it was scarred and scuffed where it had just torn up out of the snarl of scrub oak and

madrone trees on the horizon. The stars up close to the moon were pale; they got brighter and

braver the farther they got out of the circle of light ruled by the giant moon. It called to mind how I

noticed the exact same thing when I was off on a hunt with Papa and the uncles and I lay rolled in

blankets Grandma had woven, lying off a piece from where the men hunkered around the fire as

they passed a quart jar of cactus liquor in a silent circle. I watched that big Oregon prairie moon

above me put all the stars around it to shame. I kept awake watching, to see if the moon ever got

dimmer or if the stars got brighter, till the dew commenced to drift onto my cheeks and I had to pull

a blanket over my head.

Something moved on the grounds down beneath my window—cast a long spider of shadow out

across the grass as it ran out of sight behind a hedge. When it ran back to where I could get a better

look, I saw it was a dog, a young, gangly mongrel slipped off from home to find out about things

went on after dark. He was sniffing digger squirrel holes, not with a notion to go digging after one

but just to get an idea what they were up to at this hour. He’d run his muzzle down a hole, butt up

in the air and tail going, then dash off to another. The moon glistened around him on the wet grass,

and when he ran he left tracks like dabs of dark paint spattered across the blue shine of the lawn.

Galloping from one particularly interesting hole to the next, he became so took with what was

coming off—the moon up there, the night, the breeze full of smells so wild makes a young dog

drunk—that he had to lie down on his back and roll. He twisted and thrashed around like a fish,

back bowed and belly up, and when he got to his feet and shook himself a spray came off him in the

moon like silver scales.

He sniffed all the holes over again one quick one, to get the smells down good, then suddenly

froze still with one paw lifted and his head tilted, listening. I listened too, but I couldn’t hear

anything except the popping of the window shade. I listened for a long time. Then, from a long way

off, I heard a high, laughing gabble, faint and coming closer. Canada honkers going south for the

winter. I remembered all the hunting and belly-crawling I’d ever done trying to kill a honker, and

that I never got one.

I tried to look where the dog was looking to see if I could find the flock, but it was too dark. The

honking came closer and [143] closer till it seemed like they must be flying right through the dorm,

right over my head. Then they crossed the moon—a black, weaving necklace, drawn into a V by that

92

Ken Kesey one flew over the cuckoo’s nest

lead goose. For an instant that lead goose was right in the center of that circle, bigger than the

others, a black cross opening and closing, then he pulled his V out of sight into the sky once more.

I listened to them fade away till all I could hear was my memory of the sound. The dog could still

hear them a long time after me. He was still standing with his paw up; he hadn’t moved or barked

when they flew over. When he couldn’t hear them any more either, he commenced to lope off in the

direction they had gone, toward the highway, loping steady and solemn like he had an appointment.

I held my breath and I could hear the flap of his big paws on the grass as he loped; then I could hear

a car speed up out of a turn. The headlights loomed over the rise and peered ahead down the

highway. I watched the dog and the car making for the same spot of pavement.

The dog was almost to the rail fence at the edge of the grounds when I felt somebody slip up

behind me. Two people. I didn’t turn, but I knew it was the black boy named Geever and the nurse

with the birthmark and the crucifix. I heard a whir of fear start up in my head. The black boy took

my arm and pulled me around. “I’ll get ‘im,” he says.

“It’s chilly at the window there, Mr. Bromden,” the nurse tells me. “Don’t you think we’d better

climb back into our nice toasty bed?”

“He cain’t hear,” the black boy tells her. “I’ll take him. He’s always untying his sheet and roaming

‘round.”

And I move and she draws back a step and says, “Yes, please do,” to the black boy. She’s fiddling

with the chain runs down her neck. At home she locks herself in the bathroom out of sight, strips

down, and rubs that crucifix all over that stain running from the corner of her mouth in a thin line

down across her shoulders and breasts. She rubs and rubs and hails Mary to beat thunder, but the

stain stays. She looks in the mirror, sees it’s darker’n ever. Finally takes a wire brush used to take

paint off boats and scrubs the stain away, puts a nightgown on over the raw, oozing hide, and crawls

in bed.

But she’s too full of the stuff. While she’s asleep it rises in her throat and into her mouth, drains

out of that corner of her mouth like purple spit and down her throat, over her body. In the morning

she sees how she’s stained again and somehow she figures it’s not really from inside her—how could

it be? a good Catholic girl like her?—and she figures it’s on account of [144] working evenings

among a whole wardful of people like me. It’s all our fault, and she’s going to get us for it if it’s the

last thing she does. I wish McMurphy’d wake up and help me.

“You get him tied in bed, Mr. Geever, and I’ll prepare a medication.”

93

Ken Kesey one flew over the cuckoo’s nest

18

In the group meetings there were gripes coming up that had been buried so long the thing being

griped about had already changed. Now that McMurphy was around to back them up, the guys

started letting fly at everything that had ever happened on the ward they didn’t like.

“Why does the dorms have to be locked on the weekends?” Cheswick or somebody would ask.

“Can’t a fellow even have the weekends to himself?”

“Yeah, Miss Ratched,” McMurphy would say. “Why?”

“If the dorms were left open, we have learned from past experience, you men would return to

bed after breakfast.”

“Is that a mortal sin? I mean, normal people get to sleep late on the weekends.”

“You men are in this hospital,” she would say like she was repeating it for the hundredth time,

“because of your proven inability to adjust to society. The doctor and I believe that every minute

spent in the company of others, with some exceptions, is therapeutic, while every minute spent

brooding alone only increases your separation.”

“Is that the reason that there has to be at least eight guys together before they can be taken off

the ward to OT or PT or one of them Ts?”

“That is correct.”

“You mean it’s sick to want to be off by yourself?”

“I didn’t say that—”

“You mean if I go into latrine to relieve myself I should take along at least seven buddies to keep

me from brooding on the can?”

Before she could come up with an answer to that, Cheswick bounced to his feet and hollered at

her, “Yeah, is that what you mean?” and the other Acutes sitting around the meeting would say,

“Yeah, yeah, is that what you mean?”

She would wait till they all died down and the meeting was quiet again, then say quietly, “If you

men can calm yourself enough to act like a group of adults at a discussion instead of children on the

playground, we will ask the doctor if he thinks [146] it would be beneficial to consider a change in

the ward policy at this time. Doctor?”

Everybody knew the kind of answer the doctor would make, and before he even had the chance

Cheswick would be off on another complaint. “Then what about our cigarettes, Miss Ratched?”

“Yeah, what about that,” the Acutes grumbled.

McMurphy turned to the doctor and put the question straight to him this time before the nurse

had a chance to answer. “Yeah, Doc, what about our cigarettes? How does she have the right to

keep the cigarettes— our cigarettes—piled up on her desk in there like she owned them, bleed a pack

out to us now and again whenever she feels like it. I don’t care much about the idea of buying a

carton of cigarettes and having somebody tell me when I can smoke them.”

The doctor tilted his head so he could look at the nurse through his glasses. He hadn’t heard

about her taking over the extra cigarettes to stop the gambling. “What’s this about cigarettes, Miss

Ratched? I don’t believe I’ve heard—”

“I feel, Doctor, that three and four and sometimes five packages of cigarettes a day are entirely

too many for a man to smoke. That is what seemed to be happening last week—after Mr.

McMurphy’s arrival—and that is why I thought it might be best to impound the cartons the men

purchased at the canteen and allow each man only one pack a day.”

McMurphy leaned forward and whispered loudly to Cheswick, “Hear tell her next decision is

about trips to the can; not only does a guy have to take his seven buddies into the latrine with him

but he’s also limited to two trips a day, to be taken when she says so.”

94

Ken Kesey one flew over the cuckoo’s nest

And leaned back in his chair and laughed so hard that nobody else could say anything for nearly a

minute.

McMurphy was getting a lot of kick out of all the ruckus he was raising, and I think was a little

surprised that he wasn’t getting a lot of pressure from the staff too, especially surprised that the Big

Nurse wasn’t having any more to say to him than she was. “I thought the old buzzard was tougher

than this,” he said to Harding after one meeting. “Maybe all she needed to straighten her out was a

good bringdown. The thing is”—he frowned—“she acts like she still holds all the cards up that

white sleeve of hers.”

He went on getting a kick out of it till about Wednesday of the next week. Then he learned why

the Big Nurse was so sure of her hand. Wednesday’s the day they pack everybody up who hasn’t got

some kind of rot and move to the swimming [147] pool, whether we want to go or not. When the

fog was on the ward I used to hide in it to get out of going. The pool always scared me; I was always

afraid I’d step in over my head and drown, be sucked off down the drain and clean out to sea. I used

to be real brave around water when I was a kid on the Columbia; I’d walk the scaffolding around the

falls with all the other men, scrambling around with water roaring green and white all around me and

the mist making rainbows, without even any hobnails like the men wore. But when I saw my Papa

start getting scared of things, I got scared too, got so I couldn’t even stand a shallow pool.

We came out of the locker room and the pool was pitching and splashing and full of naked men;

whooping and yelling bounced off the high ceiling the way it always does in indoor swimming pools.

The black boys herded us into it. The water was a nice warm temperature but I didn’t want to get

away from the side (the black boys walk along the edge with long bamboo poles to shove you away

from the side if you try to grab on) so I stayed close to McMurphy on account of I knew they

wouldn’t try to make him go into deep water if he didn’t want to.

He was talking to the lifeguard, and I was standing a few feet away. McMurphy must of been

standing in a hole because he was having to tread water where I was just standing on the bottom.

The lifeguard was standing on the edge of the pool; he had a whistle and a T-shirt on with his ward

number on it. He and McMurphy had got to talking about the difference between hospital and jail,

and McMurphy was saying how much better the hospital was. The lifeguard wasn’t so sure. I heard

him tell McMurphy that, for one thing, being committed ain’t like being sentenced. “You’re

sentenced in a jail, and you got a date ahead of you when you know you’re gonna be turned loose,”

he said.

McMurphy stopped splashing around like he had been. He swam slowly to the edge of the pool

and held there, looking up at the lifeguard. “And if you’re committed?” he asked after a pause.

The lifeguard raised his shoulders in a musclebound shrug and tugged at the whistle around his

neck. He was an old pro-footballer with cleat marks in his forehead, and every so often when he was

off his ward a signal would click back of his eyes and his lips’d go to spitting numbers and he’d drop

to all fours in a line stance and cut loose on some strolling nurse, drive a shoulder in her kidneys just

in time to let the halfback shoot past through the hole behind him. That’s why he was up on [148]

Disturbed; whenever he wasn’t lifeguarding he was liable to do something like that.

He shrugged again at McMurphy’s question, then looked back and forth to see if any black boys

were around, and knelt close to the edge of the pool. He held his arm out for McMurphy to look at.

“You see this cast?”

McMurphy looked at the big arm. “You don’t have a cast on that arm, buddy.”

The lifeguard just grinned. “Well, that cast’s on there because I got a bad fracture in the last game

with the Browns. I can’t get back in togs till the fracture knits and I get the cast off. The nurse on

my ward tells me she’s curing the arm in secret. Yeah, man, she says if I go easy on that arm, don’t

exert it or nothing, she’ll take the cast off and I can get back with the ball club.”

95

Ken Kesey one flew over the cuckoo’s nest

He put his knuckles on the wet tile, went into a three-point stance to test how the arm was

coming along. McMurphy watched him a minute, then asked bow long he’d been waiting for them

to tell him his arm was healed so he could leave the hospital. The lifeguard raised up slowly and

rubbed his arm. He acted hurt that McMurphy had asked that, like he thought he was being accused

of being soft and licking his wounds. “I’m committed,” he said. “I’d of left here before now if it was

up to me. Maybe I couldn’t play first string, with this bum arm, but I could of folded towels,

couldn’t I? I could of done something. That nurse on my ward, she keeps telling the doctor I ain’t

ready. Not even to fold towels in the crummy old locker room, I ain’t ready.”

He turned and walked over to his lifeguard chair, climbed up the chair ladder like a drugged

gorilla, and peered down at us, his lower lip pushed way out. “I was picked up for drunk and

disorderly, and I been here eight years and eight months,” he said.

McMurphy pushed backward from the edge of the pool and trod water and thought this over:

he’d had a six months’ sentence at the work farm with two months finished, four more to go—and

four more months was the most he wanted to spend locked up any place. He’d been close to a

month in this nuthouse and it might be a lot better than a work farm, what with good beds and

orange juice for breakfast, but it wasn’t better to the point that he’d want to spend a couple of years

here.

He swam over to the steps at the shallow end of the pool and sat there the rest of the period,

tugging that little tuft of wool [149] at his throat and frowning. Watching him sitting there frowning

all to himself, I remembered what the Big Nurse had said in the meeting, and I began to feel afraid.

When they blew the whistle for us to leave the pool and we all were straggling toward the locker

room, we ran into this other ward coming into the swimming pool for their period, and in the

footbath at the shower you had to go through was this one kid from the other ward. He had a big

spongy pink head and bulgy hips and legs—like somebody’d grabbed a balloon full of water and

squeezed it in the middle—and he was lying on his side in the footbath, making noises like a sleepy

seal. Cheswick and Harding helped him stand up, and he lay right back down in the footbath. The

head bobbed around in the disinfectant. McMurphy watched them lift him standing again.

“What the devil is he?” he asked.

“He has hydrocephalus,” Harding told him. “Some manner of lymph disorder, I believe. Head

fills up with liquid. Give us a hand helping him stand up.”

They turned the kid loose, and he lay back down in the footbath again; the look on his face was

patient and helpless and stubborn; his mouth sputtered and blew bubbles in the milky-looking water.

Harding repeated his request to McMurphy to give them a hand, and he and Cheswick bent down to

the kid again. McMurphy pushed past them and stepped across the kid into the shower.

“Let him lay,” he said, washing himself down in the shower. “Maybe he don’t like deep water.”

I could see it coming. The next day he surprised everybody on the ward by getting up early and

polishing that latrine till it sparkled, and then went to work on the hall floors when the black boys

asked him to. Surprised everybody but the Big Nurse; she acted like it was nothing surprising at all.

And that afternoon in the meeting when Cheswick said that everybody’d agreed that there should

be some kind of showdown on the cigarette situation, saying, “I ain’t no little kid to have cigarettes

kept from me like cookies! We want something done about it, ain’t that right, Mack?” and waited for

McMurphy to back him up, all he got was silence.

He looked over at McMurphy’s corner. Everybody did. McMurphy was there, studying the deck

of cards that slid in and out of sight in his hands. He didn’t even look up. It was awfully quiet; there

was just that slap of greasy cards and Cheswick’s heavy breathing.

“I want something done!” Cheswick suddenly yelled again. [150] “I ain’t no little kid!” He stamped

his foot and looked around him like he was lost and might break out crying any minute. He clenched

96

Ken Kesey one flew over the cuckoo’s nest

both fists and held them at his chubby round chest. His fists made little pink balls against the green,

and they were clenched so hard he was shaking.

He never had looked big; he was short and too fat and had a bald spot in the back of his head

that showed like a pink dollar, but standing there by himself in the center of the day room like that

he looked tiny. He looked at McMurphy and got no look back, and went down the line of Acutes

looking for help. Each time a man looked away and refused to back him up, and the panic on his

face doubled. His looking finally came to a stop at the Big Nurse. He stamped his foot again.

“I want something done! Hear me? I want something done! Something! Something! Some—”

The two big black boys clamped his arms from behind, and the least one threw a strap around

him. He sagged like he’d been punctured, and the two big ones dragged him up to Disturbed; you

could hear the soggy bounce of him going up the steps. When they came back and sat down, the Big

Nurse turned to the line of Acutes across the room and looked at them. Nothing had been said since

Cheswick left.

“Is there any more discussion,” she said, “on the rationing of cigarettes?”

Looking down the canceled row of faces hanging against the wall across the room from me, my

eyes finally came to McMurphy in his chair in the corner, concentrating on improving his onehanded card cut ... and the white tubes in the ceiling begin to pump their refrigerated light again ... I

can feel it, beams all the way into my stomach.

After McMurphy doesn’t stand up for us any longer, some of the Acutes talk and say he’s still

outsmarting the Big Nurse, say that he got word she was about to send him to Disturbed and

decided to toe the line a while, not give her any reason. Others figure he’s letting her relax, then he’s

going to spring something new on her, something wilder and more ornery than ever. You can hear

them talking in groups, wondering.

But me, I know why. I heard him talk to the lifeguard. He’s finally getting cagey, is all. The way

Papa finally did when he came to realize that he couldn’t beat that group from town who wanted the

government to put in the dam because of the money and the work it would bring, and because it

would get rid of the village: Let that tribe of fish Injuns take their stink and their two hundred

thousand dollars the government is [151] paying them and go some place else with it! Papa had done

the smart thing signing the papers; there wasn’t anything to gain by bucking it. The government

would of got it anyhow, sooner or later; this way the tribe would get paid good. It was the smart

thing. McMurphy was doing the smart thing. I could see that. He was giving in because it was the

smartest thing to do, not because of any of these other reasons the Acutes were making up. He

didn’t say so, but I knew and 1 told myself it was the smart thing to do. I told myself that over and

over: It’s safe. Like hiding. It’s the smart thing to do, nobody could say any different. I know what

he’s doing.

Then one morning all the Acutes know too, know his real reason for backing down and that the

reasons they been making up were just lies to kid themselves. He never says a thing about the talk he

had with the lifeguard, but they know. I figure the nurse broadcast this during the night along all the

little lines in the dorm floor, because they know all at once. I can tell by the way they look at

McMurphy that morning when he comes in to the day room. Not looking like they’re mad with him,

or even disappointed, because they can understand as well as I can that the only way he’s going to

get the Big Nurse to lift his commitment is by acting like she wants, but still looking at him like they

wished things didn’t have to be this way.

Even Cheswick could understand it and didn’t hold anything against McMurphy for not going

ahead and making a big fuss over the cigarettes. He came back down from Disturbed on the same

day that the nurse broadcast the information to the beds, and he told McMurphy himself that he

could understand how he acted and that it was surely the sharpest thing to do, considering, and that

97

Ken Kesey one flew over the cuckoo’s nest

if he’d thought about Mack being committed he’d never have put him on the spot like he had the

other day. He told McMurphy this while we were all being taken over to the swimming pool. But

just as soon as we got to the pool he said he did wish something mighta been done, though, and dove

into the water. And got his fingers stuck some way in the grate that’s over the drain at the bottom of

the pool, and neither the big lifeguard nor McMurphy nor the two black boys could pry him loose,

and by the time they got a screwdriver and undid the grate and brought Cheswick up, with the grate

still clutched by his chubby pink and blue fingers, he was drowned.

98

Ken Kesey one flew over the cuckoo’s nest

19

Up ahead of me in the lunch line I see a tray sling in the air, a green plastic cloud raining milk and

peas and vegetable soup. Sefelt’s jittering out of the line on one foot with his arms both up in the air,

falls backward in a stiff arch, and the whites of his eyes come by me upside down. His head hits the

tile with a crack like rocks under water, and he holds the arch, like a twitching, jerking bridge.

Fredrickson and Scanlon make a jump to help, but the big black boy shoves them back and grabs a

flat stick out of his back pocket, got tape wrapped around it and covered with a brown stain. He

pries Sefelt’s mouth open and shoves the stick between his teeth, and I hear the stick splinter with

Sefelt’s bite. I can taste the slivers. Sefelt’s jerks slow down and get more powerful, working and

building up to big stiff kicks that lift him to a bridge, then falling—lifting and falling, slower and

slower, till the Big Nurse comes in and stands over him and he melts limp all over the floor in a gray

puddle.

She folds her hands in front of her, might hold a candle, and looks down at what’s left of him

oozing out of the cuffs of his pants and shirt. “Mr. Sefelt?” she says to the black boy.

“Tha’s right— uhn.” The black boy is jerking to get his stick back. “Mistuh See-fel’.”

“And Mr. Sefelt has been asserting he needs no more medication.” She nods her head, steps back a

step out of the way of him spreading toward her white shoes. She raises her head and looks round

her at the circle of Acutes that’ve come up to see. She nods again and repeats, “... needs no more

medication.” Her face is smiling, pitying, patient, and disgusted all at once—a trained expression.

McMurphy’s never seen such a thing. “What’s he got wrong with him?” he asks.

She keeps her eye on the puddle, not turning to McMurphy. “Mr. Sefelt is an epileptic, Mr.

McMurphy. This means he may be subject to seizures like this at any time if he doesn’t follow

medical advice. He knows better. We’d told him this would happen when he didn’t take his

medication. Still, he will insist on acting foolish.”

Fredrickson comes out of the line with his eyebrows bristling. [153] He’s a sinewy, bloodless guy

with blond hair and stringy blond eyebrows and a long jaw, and he acts tough every so often the way

Cheswick used to try to do—roar and rant and cuss out one of the nurses, say he’s gonna leave this

stinkin’ place! They always let him yell and shake his fist till he quiets down, then ask him if you are

through, Mr. Fredrickson, we’ll go start typing the release—then make book in the Nurses’ Station

how long it’ll be till he’s tapping at the glass with a guilty look and asking to apologize and how

about just forgetting those hotheaded things he said, just pigeonhole those old forms for a day or so,

okay?

He steps up to the nurse, shaking his fist at her. “Oh, is that it? Is that it, huh? You gonna crucify

old Seef just as if he was doing it to spite you or something?”

She lays a comforting hand on his arm, and his fist unrolls.

“It’s okay, Bruce. Your friend will be all right. Apparently he hasn’t been swallowing his Dilantin.

I simply don’t know what he is doing with it.”

She knows as well as anybody; Sefelt holds the capsules in his mouth and gives them to

Fredrickson later. Sefelt doesn’t like to take them because of what he calls “disastrous side effects,”

and Fredrickson likes a double dose because he’s scared to death of having a fit. The nurse knows

this, you can tell by her voice, but to look at her there, so sympathetic and kind, you’d think she was

ignorant of anything at all between Fredrickson and Sefelt.

“Yeahhh,” says Fredrickson, but he can’t work his attack up again. “Yeah, well, you don’t need to

act like it was as simple as just take the stuff or don’t take it. You know how Seef worries about what

he looks like and how women think he’s ugly and all that, and you know how he thinks the

Dilantin—”

99

Ken Kesey one flew over the cuckoo’s nest

“I know,” she says and touches his arm again. “He also blames his falling hair on the drug. Poor

old fellow.”

“He’s not that old!”

“I know, Bruce. Why do you get so upset? I’ve never understood what went on between you and

your friend that made you get so defensive!”

“Well, heck, anyway!” he says and jams his fists in his pockets.

The nurse bends over and brushes a little place clean on the floor and puts her knee on it and

starts kneading Sefelt back to some shape. She tells the black boy to stay with the poor old fellow

and she’ll go send a Gurney down for him; wheel him into the dorm and let him sleep the rest of the

day. When she stands she gives Fredrickson a pat on the arm, and he grumbles, [154] “Yeah, I have

to take Dilantin too, you know. That’s why I know what Seef has to face. I mean, that’s why I—well,

heck—”

“I understand, Bruce, what both of you must go through, but don’t you think anything is better

than that?”

Fredrickson looks where she points. Sefelt has pulled back halfway normal, swelling up and down

with big wet, rattling breaths. There’s a punk-knot rising on the side of his head where he landed,

and a red foam around the black boy’s stick where it goes into his mouth, and his eyes are beginning

to roll back into the whites. His hands are nailed out to each side with the palms up and the fingers

jerking open and shut, just the way I’ve watched men jerk at the Shock Shop strapped to the crossed

table, smoke curling up out of the palms from the current. Sefelt and Fredrickson never been to the

Shock Shop. They’re manufactured to generate their own voltage, store it in their spines and can be

turned on remote from the steel door in the Nurses’ Station if they get out of line—be right in the

best part of a dirty joke and stiffen like the jolt hit square in the small of the back. It saves the

trouble of taking them over to that room.

The nurse gives Fredrickson’s arm a little shake like he’d gone to sleep, and repeats, “Even if you

take into consideration the harmful effects of the medicine, don’t you think it’s better than that?”

As he stares down at the floor, Fredrickson’s blond eyebrows are raised like he’s seeing for the

first time just how he looks at least once a month. The nurse smiles and pats his arm and heads for

the door, glares at the Acutes to shame them for gathering around watching such a thing; when she’s

gone, Fredrickson shivers and tries to smile.

“I don’t know what I got mad at the old girl about—I mean, she didn’t do anything to give me a

reason to blow up like that, did she?”

It isn’t like he wants an answer; it’s more sort of realizing that he can’t put his finger on a reason.

He shivers again and starts to slip back away from the group. McMurphy comes up and asks him in

a low voice what is it they take?

“Dilantin, McMurphy, an anti-convulsant, if you must know.”

“Don’t it work or something?”

“Yeah, I guess it works all right—if you take it.”

“Then what’s the sweat about taking it or not?”

“Look, if you must know! Here’s the dirty sweat about taking it.” Fredrickson reaches up and

grabs his lower lip between [155] his thumb and finger, pulls it down to show gums ragged and pink

and bloodless around long shiny teeth. “Your gungs,” he says, hanging onto the lip. “Dilantin gnakes

your gungs rot. And a seizure gnakes you grit your teeth. And you—”

There’s a noise on the floor. They look to where Sefelt is moaning and wheezing, just as the black

boy draws two teeth out with his taped stick.

Scanlon takes his tray and walks away from the bunch, saying, “Hell of a life. Damned if you do

and damned if you don’t. Puts a man in one confounded bind, I’d say.”

100

Ken Kesey one flew over the cuckoo’s nest

McMurphy says, “Yeah, I see what you mean,” looking down into Sefelt’s gathering face. His face

has commenced to take on that same haggard, puzzled look of pressure that the face on the floor

has.

101

Ken Kesey one flew over the cuckoo’s nest

20

Whatever it was went haywire in the mechanism, they’ve just about got it fixed again. The clean,

calculated arcade movement is coming back: six-thirty out of bed, seven into the mess hall, eight the

puzzles come out for the Chronics and the cards for the Acutes. in the Nurses’ Station I can see the

white hands of the Big Nurse float over the controls.

102

Ken Kesey one flew over the cuckoo’s nest

21

They take me with the Acutes sometimes, and sometimes they don’t. They take me once with

them over to the library and I walk over to the technical section, stand there looking at the titles of

books on electronics, books I recognize from that year I went to college; I remember inside the

books are full of schematic drawings and equations and theories—hard, sure, safe things.

I want to look at one of the books, but I’m scared to. I’m scared to do anything. I feel like I’m

floating in the dusty yellow air of the library, halfway to the bottom, halfway to the top. The stacks

of books teeter above me, crazy, zig-zagging, running all different angles to one another. One shelf

bends a little to the left, one to the right. Some of them are leaning over me, and I don’t see how the

books keep from falling out. It goes up and up this way, clear out of sight, the rickety stacks nailed

together with slats and two-by-fours, propped up with poles, leaning against ladders, on all sides of

me. If I pulled one book out, lord knows what awful thing might result.

I hear somebody walk in, and it’s one of the black boys from our ward and he’s got Harding’s

wife with him. They’re talking and grinning to each other as they come into the library.

“See here, Dale,” the black boy calls over to Harding where he’s reading a book, “look here who

come to visit you. I tole her it wun’t visitin’ hours but you know she jus’ sweet-talk me into bringin’

her right on over here anyhow.” He leaves her standing in front of Harding and goes off, saying

mysteriously, “Don’t you forget now, you hear?”

She blows the black boy a kiss, then turns to Harding, slinging her hips forward. “Hello, Dale.”

“Honey,” he says, but he doesn’t make any move to take the couple of steps to her. He looks

around him at everybody watching.

She’s as tall as he is. She’s got on high-heeled shoes and is carrying a black purse, not by the

strap, but holding it the way you hold a book. Her fingernails are red as drops of blood against the

shiny black patent-leather purse.

“Hey, Mack,” Harding calls to McMurphy, who’s sitting across the room, looking at a book of

cartoons. “If you’ll curtail [158] your literary pursuits a moment I’ll introduce you to my counterpart

and Nemesis; I would be trite and say, ‘to my better half,’ but I think that phrase indicates some kind

of basically equal division, don’t you?”

He tries to laugh, and his two slim ivory fingers dip into his shirt pocket for cigarettes, fidget

around getting the last one from the package. The cigarette shakes as he places it between his lips.

He and his wife haven’t moved toward each other yet.

McMurphy heaves up out of his chair and pulls his cap off as he walks over. Harding’s wife looks

at him and smiles, lifting one of her eyebrows. “Afternoon, Miz Harding,” McMurphy says.

She smiles back bigger than before and says, “I hate Mrs. Harding, Mack; why don’t you call me

Vera?”

They all three sit back down on the couch where Harding was sitting, and he tells his wife about

McMurphy and how McMurphy got the best of the Big Nurse, and she smiles and says that it

doesn’t surprise her a bit. While Harding’s telling the story he gets enthusiastic and forgets about his

hands, and they weave the air in front of him into a picture clear enough to see, dancing the story to

the tune of his voice like two beautiful ballet women in white. His hands can be anything. But as

soon as the story’s finished he notices McMurphy and his wife are watching the hands, and he traps

them between his knees. He laughs about this, and his wife says to him, “Dale, when are you going

to learn to laugh instead of making that mousy little squeak?”

It’s the same thing that McMurphy said about Harding’s laugh on that first day, but it’s different

somehow; where McMurphy saying it calmed Harding down, her saying it makes him more nervous

than ever.

103

Ken Kesey one flew over the cuckoo’s nest

She asks for a cigarette, and Harding dips his fingers in his pocket again and it’s empty. “We’ve

been rationed,” he says, folding his thin shoulders forward like he was trying to hide the halfsmoked cigarette he was holding, “to one pack a day. That doesn’t seem to leave a man any margin

for chivalry, Vera my dearest.”

“Oh Dale, you never do have enough, do you?”

His eyes take on that sly, fevered skittishness as he looks at her and smiles. “Are we speaking

symbolically, or are we still dealing with the concrete here-and-now cigarettes? No matter; you know

the answer to the question, whichever way you intended it.”

“I didn’t intend nothing by it except what I said, Dale—”

[159] “You didn’t intend any thing by it, sweetest; your use of ‘didn’t’ and ‘nothing’ constitutes a

double negative. McMurphy, Vera’s English rivals yours for illiteracy. Look, honey, you understand

that between ‘no’ and ‘any’ there is—”

“All right! That’s enough! I meant it both ways. I meant it any way you want to take it. I meant

you don’t have enough of nothing period!”

“Enough of anything, my bright little child.”

She glares at Harding a second, then turns to McMurphy sitting beside her. “You, Mack, what

about you. Can you handle a simple little thing like offering a girl a cigarette?”

His package is already lying in his lap. He looks down at it like he wishes it wasn’t, then says,

“Sure, I always got cigarettes. Reason is, I’m a bum. I bum them whenever I get the chance is why

my pack lasts longer than Harding’s here. He smokes only his own. So you can see he’s more likely

to run out than—”

“You don’t have to apologize for my inadequacies, my friend. It neither fits your character nor

complements mine.”

“No, it doesn’t,” the girl says. “All you have to do is light my cigarette.”

And she leans so far forward to his match that even clear across the room I could see down her

blouse.

She talks some more about some of Harding’s friends who she wishes would quit dropping

around the house looking for him. “You know the type, don’t you, Mack?” she says. “The hoitytoity boys with the nice long hair combed so perfectly and the limp little wrists that flip so nice.”

Harding asks her if it was only him that they were dropping around to see, and she says any man

that drops around to see her flips more than his damned limp wrists.

She stands suddenly and says it’s time for her to go. She takes McMurphy’s hand and tells him

she hopes she sees him again sometime and she walks out of the library. McMurphy can’t say a

word. At the clack of her high heels everybody’s head comes up again, and they watch her walk

down the hall till she turns out of sight.

“What do you think?” Harding says.

McMurphy starts. “She’s got one hell of a set of chabobs,” is all he can think of. “Big as Old

Lady Ratched’s.”

“I didn’t mean physically, my friend, I mean what do you—”

“Hell’s bells, Harding!” McMurphy yells suddenly. “I don’t know what to think! What do you

want out of me? A marriage counsellor? All I know is this: nobody’s very big in the first place, and it

looks to me like everybody spends their whole life tearing everybody else down. I know what you

want me to [160] think; you want me to feel sorry for you, to think she’s a real bitch. Well, you

didn’t make her feel like any queen either. Well, screw you and ‘what do you think?’ I’ve got worries

of my own without getting hooked with yours. So just quit!” He glares around the library at the

other patients. “Alla you! Quit bugging me, goddammit!”

And sticks his cap back on his head and walks back to his cartoon magazine across the room. All

the Acutes are looking at each other with their mouths open. What’s he hollering at them about?

104

Ken Kesey one flew over the cuckoo’s nest

Nobody’s been bugging him. Nobody’s asked him for a thing since they found out that he was

trying to behave to keep his commitment from being extended. Now they’re surprised at the way he

just blew up at Harding and can’t figure the way he grabs the book up from the chair and sits down

and holds it up close in front of his face—either to keep people from looking at him or to keep

from having to look at people.

That night at supper he apologizes to Harding and says he don’t know what hung him up so at

the library. Harding says perhaps it was his wife; she frequently hangs people up. McMurphy sits

staring into his coffee and says, “I don’t know, man. I just met her this afternoon. So she sure the

hell isn’t the one’s been giving me bad dreams this last miserable week.”

“Why, Mis-tur McMurphy,” Harding cries, trying to talk like the little resident boy who comes to

the meetings, “you simply must tell us about these dreams. Ah, wait until I get my pencil and pad.”

Harding is trying to be funny to relieve the strain of the apology. He picks up a napkin and a spoon

and acts like he’s going to take notes. “Now. Pre-cisely, what was it you saw in these—ah—

dreams?”

McMurphy don’t crack a smile. “I don’t know, man. Nothing but faces, I guess—just faces.”

The next morning Martini is behind the control panel in the tub room, playing like he’s a jet pilot.

The poker game stops to grin at his act.

“EeeeeeaahHOOoomeerr. Ground to air, ground to air: object sighted four-oh-sixteenhundred—appears to be enemy missile. Proceed at once! EeeahhOOOmmmm.”

Spins a dial, shoves a lever forward and leans with the bank of the ship. He cranks a needle to

“ON FULL” at the side of the panel, but no water comes out of the nozzles set around the square tile

booth in front of him. They don’t use hydrotherapy any more, and nobody’s turned the water on.

Brand-new chrome equipment and steel panel never been used. Except for the chrome the panel

and shower look just like the [161] hydrotherapy outfits they used at the old hospital fifteen years

ago: nozzles capable of reaching parts of the body from every angle, a technician in a rubber apron

standing on the other side of the room manipulating the controls on that panel, dictating which

nozzles squirt where, how hard, how hot—spray opened soft and soothing, then squeezed sharp as a

needle-you hung up there between the nozzles in canvas straps, soaked and limp and wrinkled while

the technician enjoyed his toy.

“EeeeaaooOOOoommm. ... Air to ground, air to ground: missile sighted; coming into my sights

now. ...

Martini bends down and aims over the panel through the ring of nozzles. He closes one eye and

peeps through the ring with the other eye.

“On target! Ready … Aim ... Fi—!”

His hands jerk back from the panel and he stands bolt upright, hair flying and both eyes bulging

out at the shower booth so wild and scared all the card-players spin around in their chairs to see if

they can see it too—but they don’t see anything in there but the buckles hanging among the nozzles

on stiff new canvas straps.

Martini turns and looks straight at McMurphy. No one else. “Didn’t you see thum? Didn’t you?”

“See who, Mart? I don’t see anything.”

“In all those straps? Didn’t you?”

McMurphy turns and squints at the shower. “Nope. Not a thing.”

“Hold it a minute. They need you to see thum,” Martini says.

“Damn you, Martini, I told you I can’t see them! Understand? Not a blessed thing!”

“Oh,” Martini says. He nods his head and turns from the shower booth. “Well, I didn’t see thum

either. I’s just kidding you.”

105

Ken Kesey one flew over the cuckoo’s nest

McMurphy cuts the deck and shuffles it with a buzzing snap. “Well—I don’t care for that sort of

kiddin’, Mart.” He cuts to shuffle again, and the cards splash everywhere like the deck exploded

between his two trembling hands.

106

Ken Kesey one flew over the cuckoo’s nest

22

I remember it was a Friday again, three weeks after we voted on TV, and everybody who could

walk was herded over to Building One for what they try to tell us is chest X-rays for TB, which I

know is a check to see if everybody’s machinery is functioning up to par.

We’re benched in a long row down a bail leading to a door marked X-RAY. Next to X-ray is a

door marked EENT where they check our throats during the winter. Across the hall from us is

another bench, and it leads to that metal door. With the line of rivets. And nothing marked on it at

all. Two guys are dozing on the bench between two black boys, while another victim inside is getting

his treatment and I can hear him screaming. The door opens inward with a whoosh, and I can see

the twinkling tubes in the room. They wheel the victim out still smoking, and I grip the bench where

I sit to keep from being sucked through that door. A black boy and a white one drag one of the

other guys on the bench to his feet, and he sways and staggers under the drugs in him. They usually

give you red capsules before Shock. They push him through the door, and the technicians get him

under each arm. For a second I see the guy realizes where they got him, and he stiffens both heels

into the cement floor to keep from being pulled to the table—then the door pulls shut, phumph,

with metal hitting a mattress, and I can’t see him any more.

“Man, what they got going on in there?” McMurphy asks Harding.

“In there? Why, that’s right, isn’t it? You haven’t had the pleasure. Pity. An experience no human

should be without.” Harding laces his fingers behind his neck and leans back to look at the door.

“That’s the Shock Shop I was telling you about some time back, my friend, the EST, Electro-Shock

Therapy. Those fortunate souls in there are being given a free trip to the moon. No, on second

thought, it isn’t completely free. You pay for the service with brain cells instead of money, and

everyone has simply billions of brain cells on deposit. You won’t miss a few.”

He frowns at the one lone man left on the bench. “Not a very large clientele today, it seems,

nothing like the crowds [163] of yesteryear. But then, c’est la vie, fads come and go. And I’m afraid we

are witnessing the sunset of EST. Our dear head nurse is one of the few with the heart to stand up

for a grand old Faulknerian tradition in the treatment of the rejects of sanity: Brain Burning.”

The door opens. A Gurney comes whirring out, nobody pushing it, takes the corner on two

wheels and disappears smoking up the hall. McMurphy watches them take the last guy in and close

the door.

“What they do is”—McMurphy listens a moment—“take some bird in there and shoot electricity

through his skull?”

“That’s a concise way of putting it.”

“What the hell for?”

“Why, the patient’s good, of course. Everything done here is for the patient’s good. You may

sometimes get the impression, having lived only on our ward, that the hospital is a vast efficient

mechanism that would function quite well if the patient were not imposed on it, but that’s not true.

EST isn’t always used for punitive measures, as our nurse uses it, and it isn’t pure sadism on the

staff’s part, either. A number of supposed Irrecoverables were brought back into contact with shock,

just as a number were helped with lobotomy and leucotomy. Shock treatment has some advantages;

it’s cheap, quick, entirely painless. It simply induces a seizure.”

“What a life,” Sefelt moans. “Give some of us pills to stop a fit, give the rest shock to start one.”

Harding leans forward to explain it to McMurphy. “Here’s how it came about: two psychiatrists

were visiting a slaughterhouse, for God knows what perverse reason, and were watching cattle being

killed by a blow between the eyes with a sledgehammer. They noticed that not all of the cattle were

killed, that some would fall to the floor in a state that greatly resembled an epileptic convulsion. ‘Ah,

107

Ken Kesey one flew over the cuckoo’s nest

zo,’ the first doctor says. ‘Ziz is exactly vot ve need for our patients—zee induced fit!’ His colleague

agreed, of course. It was known that men coming out of an epileptic convulsion were inclined to be

calmer and more peaceful for a time, and that violent cases completely out of contact were able to

carry on rational conversations after a convulsion. No one knew why; they still don’t. But it was

obvious that if a seizure could be induced in non-epileptics, great benefits might result. And here,

before them, stood a man inducing seizures every so often with remarkable aplomb.”

Scanlon says he thought the guy used a hammer instead of a bomb, but Harding says he will

ignore that completely, and he goes ahead with the explanation. [164] “A hammer is what the

butcher used. And it was here that the colleague had some reservations. After all, a man wasn’t a

cow. Who knows when the hammer might slip and break a nose? Even knock out a mouthful of

teeth? Then where would they be, with the high cost of dental work? If they were going to knock a

man in the head, they needed to use something surer and more accurate than a hammer; they finally

settled on electricity.”

“Jesus, didn’t they think it might do some damage? Didn’t the public raise Cain about it?”

“I don’t think you fully understand the public, my friend; in this country, when something is out

of order, then the quickest way to get it fixed is the best way.”

McMurphy shakes his head. “Hoo- wee! Electricity through the head. Man, that’s like electrocuting

a guy for murder.”

“The reasons for both activities are much more closely related than you might think; they are

both cures.”

“And you say it don’t hurt?”

“I personally guarantee it. Completely painless. One flash and you’re unconscious immediately.

No gas, no needle, no sledgehammer. Absolutely painless. The thing is, no one ever wants another

one. You … change. You forget things. It’s as if”—he presses his hands against his temples, shutting

his eyes—“it’s as if the jolt sets off a wild carnival wheel of images, emotions, memories. These

wheels, you’ve seen them; the barker takes your bet and pushes a button. Chang! With light and

sound and numbers round and round in a whirlwind, and maybe you win with what you end up with

and maybe you lose and have to play again. Pay the man for another spin, son, pay the man.”

“Take it easy, Harding.”

The door opens and the Gurney comes back out with the guy under a sheet, and the technicians

go out for coffee. McMurphy runs his hand through his hair. “I don’t seem able to get all this stuff

that’s happening straight in my mind.”

“What’s that? This shock treatment?”

“Yeah. No, not just that. All this ...” He waves his hand in a circle. “All these things going on.”

Harding’s hand touches McMurphy’s knee. “Put your troubled mind at ease, my friend. In all

likelihood you needn’t concern yourself with EST. It’s almost out of vogue and only used in the

extreme cases nothing else seems to reach, like lobotomy.”

“Now lobotomy, that’s chopping away part of the brain?”

“You’re right again. You’re becoming very sophisticated in [165] the jargon. Yes; chopping away

the brain. Frontal-lobe castration. I guess if she can’t cut below the belt she’ll do it above the eyes.”

“You mean Ratched.”

“I do indeed.”

“I didn’t think the nurse had the say—so on this kind of thing.”

“She does indeed.”

McMurphy acts like he’s glad to get off talking about shock and lobotomy and get back to talking

about the Big Nurse. He asks Harding what he figures is wrong with her. Harding and Scanlon and

some of the others have all kinds of ideas. They talk for a while about whether she’s the root of all

the trouble here or not, and Harding says she’s the root of most of it. Most of the other guys think

108

Ken Kesey one flew over the cuckoo’s nest

so too, but McMurphy isn’t so sure any more. He says he thought so at one time but now he don’t

know. He says he don’t think getting her out of the way would really make much difference; he says

that there’s something bigger making all this mess and goes on to try to say what he thinks it is. He

finally gives up when he can’t explain it.

McMurphy doesn’t know it, but he’s onto what I realized a long time back, that it’s not just the

Big Nurse by herself, but it’s the whole Combine, the nation-wide Combine that’s the really big

force, and the nurse is just a high-ranking official for them.

The guys don’t agree with McMurphy. They say they know what the trouble with things is, then

get in an argument about that. They argue till McMurphy interrupts them.

“Hell’s bells, listen at you,” McMurphy says. “All I hear is gripe, gripe, gripe. About the nurse or

the staff or the hospital. Scanlon wants to bomb the whole outfit. Sefelt blames the drugs.

Fredrickson blames his family trouble. Well, you’re all just passing the buck.”

He says that the Big Nurse is just a bitter, icy-hearted old woman, and all this business trying to

get him to lock horns with her is a lot of bull—wouldn’t do anybody any good, especially him.

Getting shut of her wouldn’t be getting shut of the real deep-down hang-up that’s causing the gripes.

“You think not?” Harding says. “Then since you are suddenly so lucid on the problem of mental

health, what is this trouble? What is this deep-down hang-up, as you so cleverly put it.”

“I tell you, man, I don’t know. I never seen the beat of it.” He sits still for a minute, listening to

the hum from the X-ray [166] room; then he says, “But if it was no more’n you say, if it was, say, just

this old nurse and her sex worries, then the solution to all your problems would be to just throw her

down and solve her worries, wouldn’t it?”

Scanlon claps his hands. “Hot damn! That’s it. You’re nominated, Mack, you’re just the stud to

handle the job.”

“Not me. No sir. You got the wrong boy.”

“Why not? I thought you’s the super-stud with all that whambam.”

“Scanlon, buddy, I plan to stay as clear of that old buzzard as I possibly can.”

“So I’ve been noticing,” Harding says, smiling. “What’s happened between the two of you? You

had her on the ropes for a period there; then you let up. A sudden compassion for our angel of

mercy?”

“No; I found out a few things, that’s why. Asked around some different places. I found out why

you guys all kiss her ass so much and bow and scrape and let her walk all over you. I got wise to

what you were using me for.”

“Oh? That’s interesting.”

“You’re blamed right it’s interesting. It’s interesting to me that you bums didn’t tell me what a

risk I was running, twisting her tail that way. Just because I don’t like her ain’t a sign I’m gonna bug

her into adding another year or so to my sentence. You got to swallow your pride sometimes and

keep an eye out for old Number One.”

“Why, friends, you don’t suppose there’s anything to this rumor that our Mr. McMurphy has

conformed to policy merely to aid his chances of an early release?”

“You know what I’m talking about, Harding. Why didn’t you tell me she could keep me

committed in here till she’s good and ready to turn me loose?”

“Why, I had forgotten you were committed.” Harding’s face folds in the middle over his grin. “Yes.

You’re becoming sly. Just like the rest of us.”

“You damn betcha I’m becoming sly. Why should it be me goes to bat at these meetings over

these piddling little gripes about keeping the dorm door open and about cigarettes in the Nurses’

Station? I couldn’t figure it at first, why you guys were coming to me like I was some kind of savior.

Then I just happened to find out about the way the nurses have the big say as to who gets

discharged and who doesn’t. And I got wise awful damned fast. I said, ‘Why, those slippery bastards

109

Ken Kesey one flew over the cuckoo’s nest

have conned me, snowed me into holding their bag. If that don’t beat all, conned ol’ R. P.

McMurphy.’ “ He tips his head [167] back and grins at the line of us on the bench. “Well, I don’t

mean nothing personal, you understand, buddies, but screw that noise. I want out of here just as

much as the rest of you. I got just as much to lose hassling that old buzzard as you do.”

He grins and winks down his nose and digs Harding in the ribs with his thumb, like he’s finished

with the whole thing but no hard feelings, when Harding says something else.

“No. You’ve got more to lose than I do, my friend.”

Harding’s grinning again, looking with that skitterish sideways look of a jumpy mare, a dipping,

rearing motion of the head. Everybody moves down a place. Martini comes away from the X-ray

screen, buttoning his shirt and muttering, “I wouldn’t of believed it if I hadn’t saw it,” and Billy

Bibbit goes to the black glass to take Martini’s place.

“You have more to lose than I do,” Harding says again. “I’m voluntary. I’m not committed.”

McMurphy doesn’t say a word. He’s got that same puzzled look on his face like there’s something

isn’t right, something he can’t put his finger on. He just sits there looking at Harding, and Harding’s

rearing smile fades and he goes to fidgeting around from McMurphy staring at him so funny. He

swallows and says, “As a matter of fact, there are only a few men on the ward who are committed.

Only Scanlon and—well, I guess some of the Chronics. And you. Not many commitments in the

whole hospital. No, not many at all.”

Then he stops, his voice dribbling away under McMurphy’s eyes. After a bit of silence McMurphy

says softly, “Are you bullshitting me?” Harding shakes his head. He looks frightened. McMurphy

stands up in the hall and says, “Are you guys bullshitting me!”

Nobody’ll say anything. McMurphy walks up and down in front of that bench, running his hand

around in that thick hair. He walks all the way to the back of the line, then all the way to the front,

to the X-ray machine. It hisses and spits at him.

“You, Billy—you must be committed, for Christsakes!”

Billy’s got his back to us, his chin up on the black screen, standing on tiptoe. No, he says into the

machinery.

“Then why? Why? You’re just a young guy! You oughta be out running around in a convertible,

bird-dogging girls. All of this”—he sweeps his hand around him again—”why do you stand for it?”

Billy doesn’t say anything, and McMurphy turns from him to another couple of guys.

“Tell me why. You gripe, you bitch for weeks on end about [168] how you can’t stand this place,

can’t stand the nurse or anything about her, and all the time you ain’t committed. I can understand it

with some of those old guys on the ward. They’re nuts. But you, you’re not exactly the everyday man

on the street, but you’re not nuts.”

They don’t argue with him. He moves on to Sefelt.

“Sefelt, what about you? There’s nothing wrong with you but you have fits. Hell, I had an uncle

who threw conniptions twice as bad as yours and saw visions from the Devil to boot, but he didn’t

lock himself in the nuthouse. You could get along outside if you had the guts—”

“Sure!” It’s Billy, turned from the screen, his face boiling tears. “Sure!” he screams again. “If we

had the g-guts! I could go outside to-today, if I had the guts. My m-m-mother is a good friend of MMiss Ratched, and I could get an AMA signed this afternoon, if I had the guts!”

He jerks his shirt up from the bench and tries to pull it on, but he’s shaking too hard. Finally he

slings it from him and turns back to McMurphy.

“You think I wuh-wuh-wuh- want to stay in here? You think I wouldn’t like a con-con-vertible

and a guh-guh-girl friend? But did you ever have people l-l-laughing at you? No, because you’re so

b-big and so tough! Well, I’m not big and tough. Neither is Harding. Neither is F-Fredrickson.

Neither is SuhSefelt. Oh—oh, you—you t-talk like we stayed in here because we liked it! Oh—it’s nno use …”

110

Ken Kesey one flew over the cuckoo’s nest

He’s crying and stuttering too hard to say anything else, and he wipes his eyes with the backs of

his hands so he can see. One of the scabs pulls off his hand, and the more he wipes the more he

smears blood over his face and in his eyes. Then he starts running blind, bouncing down the hall

from side to side with his face a smear of blood, a black boy right after him.

McMurphy turns round to the rest of the guys and opens his mouth to ask something else, and

then closes it when he sees how they’re looking at him. He stands there a minute with the row of

eyes aimed at him like a row of rivets; then he says, “Hell’s bells,” in a weak sort of way, and he puts

his cap back on and pulls it down hard and goes back to his place on the bench. The two technicians

come back from coffee and go back in that room across the hall; when the door whooshes open you

can smell the acid in the air like when they recharge a battery. McMurphy sits there, looking at that

door.

“I don’t seem able to get it straight in my mind. ...”

111

Ken Kesey one flew over the cuckoo’s nest

23

Crossing the grounds back to the ward, McMurphy lagged back at the tail end of the bunch with

his hands in the pockets of his greens and his cap tugged low on his head, brooding over a cold

cigarette. Everybody was keeping pretty quiet. They’d got Billy calmed down, and he was walking at

the front of the group with a black boy on one side and that white boy from the Shock Shop on the

other side.

I dropped back till I was walking beside McMurphy and I wanted to tell him not to fret about it,

that nothing could be done, because I could see that there was some thought he was worrying over

in his mind like a dog worries at a hole he don’t know what’s down, one voice saying, Dog, that hole

is none of your affair—it’s too big and too black and there’s a spoor all over the place says bears or

something just as bad. And some other voice coming like a sharp whisper out of way back in his

breed, not a smart voice, nothing cagey about it, saying, Sic ‘im, dog, sic ‘im!

I wanted to tell him not to fret about it, and I was just about to come out and say it when he

raised his head and shoved his hat back and speeded up to where the least black boy was walking

and slapped him on the shoulder and asked him, “Sam, what say we stop by the canteen here a

second so I can pick me up a carton or two of cigarettes.”

I had to hurry to catch up, and the run made my heart ring a high, excited pitch in my head. Even

in the canteen I still heard that sound my heart had knocked ringing in my head, though my heart

had slowed back to normal. The sound reminded me of how I used to feel standing in the cold fall

Friday night out on a football field, waiting for the ball to be kicked and the game to get going. The

ringing would build and build till I didn’t think I could stand still any longer; then the kick would

come and it would be gone and the game would be on its way. I felt that same Friday-night ringing

now, and felt the same wild, stomping-up-and-down impatience. And I was seeing sharp and highpitched too, the way I did before a game and the way I did looking out of the dorm window a while

back: everything was sharp and clear and solid like I forgot [170] it could be. Lines of toothpaste and

shoelaces, ranks of sunglasses and ballpoint pens guaranteed right on them to write a lifetime on

butter under water, all guarded against shoplifters by a big-eyed force of Teddy bears sitting high on

a shelf over the counter.

McMurphy came stomping up to the counter beside me and hooked his thumbs in his pockets

and told the salesgirl to give him a couple of cartons of Marlboros. “Maybe make it three cartons,”

he said, grinning at her. “I plan to do a lot of smokin’.”

The ringing didn’t stop until the meeting that afternoon. I’d been half listening to them work on

Sefelt to get him to face up to the reality of his problems so he could adjust (“It’s the Dilantin!” he

finally yells. “Now, Mr. Sefelt, if you’re to be helped, you must be honest,” she says. “But, it’s got to

be the Dilantin that does it; don’t it make my gums soft?” She smiles. “Jim, you’re forty-five years old

…”) when I happened to catch a look at McMurphy sitting in his corner. He wasn’t fiddling with a

deck of cards or dozing into a magazine like he had been during all the meetings the last two weeks.

And he wasn’t slouched down. He was sitting up stiff in his chair with a flushed, reckless look on his

face as he looked back and forth from Sefelt to the Big Nurse. As I watched, the ringing went

higher. His eyes were blue stripes under those white eyebrows, and they shot back and forth just the

way he watched cards turning up around a poker table. I was certain that any minute he was going to

do some crazy thing to get him up on Disturbed for sure. I’d seen the same look on other guys

before they’d climbed all over a black boy. I gripped down on the arm of my chair and waited,

scared it would happen, and, I began to realize, just a little scared it wouldn’t.

He kept quiet and watched till they were finished with Sefelt; then he swung half around in his

chair and watched while Fredrickson, trying some way to get back at them for the way they had

112

Ken Kesey one flew over the cuckoo’s nest

grilled his friend, griped for a few loud minutes about the cigarettes being kept in the Nurses’

Station. Fredrickson talked himself out and finally flushed and apologized like always and sat back

down. McMurphy still hadn’t made any kind of move. I eased up where I’d been gripping the arm of

the chair, beginning to think I’d been wrong.

There was just a couple of minutes left in the meeting. The Big Nurse folded up her papers and

put them in the basket and set the basket off her lap on the floor, then let her eyes swing to

McMurphy for just a second like she wanted to check if he was awake and listening. She folded her

hands in her lap and [171] looked down at the fingers and drew a deep breath, shaking her head.

“Boys, I’ve given a great deal of thought to what I am about to say. I’ve talked it over with the

doctor and with the rest of the staff, and, as much as we regretted it, we all came to the same

conclusion—that there should be some manner of punishment meted out for the unspeakable

behavior concerning the house duties three weeks ago.” She raised her hand and looked around.

“We waited this long to say anything, hoping that you men would take it upon yourselves to

apologize for the rebellious way you acted. But not a one of you has shown the slightest sign of

remorse.”

Her hand went up again to stop any interruptions that might come—the movement of a tarotcard reader in a glass arcade case.

“Please understand: We do not impose certain rules and restrictions on you without a great deal

of thought about their therapeutic value. A good many of you are in here because you could not

adjust to the rules of society in the Outside World, because you refused to face up to them, because

you tried to circumvent them and avoid them. At some time—perhaps in your childhood—you may

have been allowed to get away with flouting the rules of society. When you broke a rule you knew it.

You wanted to be dealt with, needed it, but the punishment did not come. That foolish lenience on

the part of your parents may have been the germ that grew into your present illness. I tell you this

hoping you will understand that it is entirely for your own good that we enforce discipline and order.”

She let her head twist around the room. Regret for the job she has to do was worked into her

face. It was quiet except for that high fevered, delirious ringing in my head.

“It’s difficult to enforce discipline in these surroundings. You must be able to see that. What can

we do to you? You can’t be arrested. You can’t be put on bread and water. You must see that the

staff has a problem; what can we do?”

Ruckly had an idea what they could do, but she didn’t pay any attention to it. The face moved

with a ticking noise till the features achieved a different look. She finally answered her own question.

“We must take away a privilege. And after careful consideration of the circumstances of this

rebellion, we’ve decided that there would be a certain justice in taking away the privilege of the tub

room that you men have been using for your card games during the day. Does this seem unfair?”

Her head didn’t move. She didn’t look. But one by one [172] everybody else looked at him sitting

there in his corner. Even the old Chronics, wondering why everybody had turned to look in one

direction, stretched out their scrawny necks like birds and turned to look at McMurphy—faces

turned to him, full of a naked, scared hope.

That single thin note in my head was like tires speeding down a pavement.

He was sitting straight up in his chair, one big red finger scratching lazily at the stitchmarks run

across his nose. He grinned at everybody looking at him and took his cap by the brim and tipped it

politely, then looked back at the nurse.

“So, if there is no discussion on this ruling, I think the hour is almost over …”

She paused again, took a look at him herself. He shrugged his shoulders and with a loud sigh

slapped both hands down on his knees and pushed himself standing out of the chair. He stretched

and yawned and scratched the nose again and started strolling across the day-room floor to where

she sat by the Nurses’ Station, heisting his pants with his thumbs as he walked. I could see it was too

113

Ken Kesey one flew over the cuckoo’s nest

late to keep him from doing whatever fool thing he had in mind, and I just watched, like everybody

else. He walked with long steps, too long, and he had his thumbs hooked in his pockets again. The

iron in his boot heels cracked lightning out of the tile. He was the logger again, the swaggering

gambler, the big redheaded brawling Irishman, the cowboy out of the TV set walking down the

middle of the street to meet a dare.

The Big Nurse’s eyes swelled out white as he got close. She hadn’t reckoned on him doing

anything. This was supposed to be her final victory over him, supposed to establish her rule once

and for all. But here he comes and he’s big as a house!

She started popping her mouth and looking for her black boys, scared to death, but be stopped

before he got to her. He stopped in front of her window and he said in his slowest, deepest drawl

how he figured he could use one of the smokes he bought this mornin’, then ran his hand through

the glass.

The glass came apart like water splashing, and the nurse threw her hands to her ears. He got one

of the cartons of cigarettes with his name on it and took out a pack, then put it back and turned to

where the Big Nurse was sitting like a chalk statue and very tenderly went to brushing the slivers of

glass off her hat and shoulders.

“I’m sure sorry, ma’am,” he said. “Gawd but I am. That window glass was so spick and span I

com- pletely forgot it was there.”

[173] It took just a couple of seconds. He turned and left her sitting there with her face shifting

and jerking and walked back across the day room to his chair, lighting up a cigarette.

The ringing that was in my head had stopped.

114

Ken Kesey one flew over the cuckoo’s nest

part 3

115

Ken Kesey one flew over the cuckoo’s nest

24

After that, McMurphy had things his way for a good long while. The nurse was biding her time

till another idea came to her that would put her on top again. She knew she’d lost one big round and

was losing another, but she wasn’t in any hurry. For one thing, she wasn’t about to recommend

release; the fight could go on as long as she wanted, till he made a mistake or till he just gave out, or

until she could come up with some new tactic that would put her back on top in everybody’s eyes.

A good lot happened before she came up with that new tactic. After McMurphy was drawn out

of what you might call a short retirement and had announced he was back in the hassle by breaking

out her personal window, he made things on the ward pretty interesting. He took part in every

meeting, every discussion—drawling, winking, joking his best to wheedle a skinny laugh out of some

Acute who’d been scared to grin since he was twelve. He got together enough guys for a basketball

team and some way talked the doctor into letting him bring a ball back from the gym to get the team

used to handling it. [175] The nurse objected, said the next thing they’d be playing soccer in the day

room and polo games up and down the hall, but the doctor held firm for once and said let them go.

“A number of the players, Miss Ratched, have shown marked progress since that basketball team

was organized; I think it has proven its therapeutic value.”

She looked at him a while in amazement. So he was doing a little muscle-flexing too. She marked

the tone of his voice for later, for when her time came again, and just nodded and went to sit in her

Nurses’ Station and fiddle with the controls on her equipment. The janitors had put a cardboard in

the frame over her desk till they could get another window pane cut to fit, and she sat there behind

it every day like it wasn’t even there, just like she could still see right into the day room. Behind that

square of cardboard she was like a picture turned to the wall.

She waited, without comment, while McMurphy continued to run around the halls in the

mornings in his white-whale shorts, or pitched pennies in the dorms, or ran up and down the hall

blowing a nickel-plated ref’s whistle, teaching Acutes the fast break from ward door to the Seclusion

Room at the other end, the ball pounding in the corridor like cannon shots and McMurphy roaring

like a sergeant, “Drive, you puny mothers, drive!”

When either one spoke to the other it was always in the most polite fashion. He would ask her

nice as you please if he could use her fountain pen to write a request for an Unaccompanied Leave

from the hospital, wrote it out in front of her on her desk, and handed her the request and the pen

back at the same time with such a nice, “Thank you,” and she would look at it and say just as polite

that she would “take it up with the staff”—which took maybe three minutes—and come back to tell

him she certainly was sorry but a pass was not considered therapeutic at this time. He would thank

her again and walk out of the Nurses’ Station and blow that whistle loud enough to break windows

for miles, and holler, “Practice, you mothers, get that ball and let’s get a little sweat rollin’.”

He’d been on the ward a month, long enough to sign the bulletin board in the hall to request a

hearing in group meeting about an Accompanied Pass. He went to the bulletin board with her pen

and put down under TO BE ACCOMPANIED BY: “A twitch I know from Portland named Candy

Starr.”—and ruined the pen point on the period. The pass request was brought up in group meeting

a few days later, the same day, in fact, that workmen put a new glass window in front of the Big

Nurse’s [176] desk, and after his request had been turned down on the grounds that this Miss Starr

didn’t seem like the most wholesome person for a patient to go pass with, he shrugged and said

that’s how she bounces I guess, and got up and walked to the Nurses’ Station, to the window that

still had the sticker from the glass company down in the corner, and ran his fist through it again—

explained to the nurse while blood poured from his fingers that he thought the cardboard had been

116

Ken Kesey one flew over the cuckoo’s nest

left out and the frame was open. “When did they sneak that danged glass in there? Why that thing is

a menace!”

The nurse taped his hand in the station while Scanlon and Harding dug the cardboard out of the

garbage and taped it back in the frame, using adhesive from the same roll the nurse was bandaging

McMurphy’s wrist and fingers with. McMurphy sat on a stool, grimacing something awful while he

got his cuts tended, winking at Scanlon and Harding over the nurse’s head. The expression on her

face was calm and blank as enamel, but the strain was beginning to show in other ways. By the way

she jerked the adhesive tight as she could, showing her remote patience wasn’t what it used to be.

We got to go to the gym and watch our basketball team—Harding, Billy Bibbit, Scanlon,

Fredrickson, Martini, and McMurphy whenever his hand would stop bleeding long enough for him

to get in the game—play a team of aides. Our two big black boys played for the aides. They were the

best players on the court, running up and down the floor together like a pair of shadows in red

trunks, scoring basket after basket with mechanical accuracy. Our team was too short and too slow,

and Martini kept throwing passes to men that nobody but him could see, and the aides beat us by

twenty points. But something happened that let most of us come away feeling there’d been a kind of

victory, anyhow: in one scramble for the ball our big black boy named Washington got cracked with

somebody’s elbow, and his team had to hold him back as he stood straining to where McMurphy

was sitting on the ball—not paying the least bit of heed to the thrashing black boy with red pouring

out of his big nose and down his chest like paint splashed on a blackboard and hollering to the guys

holding him, “He beggin’ for it! The sonabitch jus’ beggin’ for it!”

McMurphy composed more notes for the nurse to find in the latrine with her mirror. He wrote

long outlandish tales about himself in the log book and signed them Anon. Sometimes he slept till

eight o’clock. She would reprimand him, without heat at all, and he would stand and listen till she

was finished and then destroy her whole effect by asking something [177] like did she wear a B cup,

he wondered, or a C cup, or any ol’ cup at all?

The other Acutes were beginning to follow his lead. Harding began flirting with all the student

nurses, and Billy Bibbit completely quit writing what he used to call his “observations” in the log

book, and when the window in front of her desk got replaced again, with a big X across it in

whitewash to make sure McMurphy didn’t have any excuse for not knowing it was there, Scanlon

did it in by accidentally bouncing our basketball through it before the whitewashed X was even dry.

The ball punctured, and Martini picked it off the floor like a dead bird and carried it to the nurse in

the station, where she was staring at the new splash of broken glass all over her desk, and asked

couldn’t she please fix it with tape or something? Make it well again? Without a word she jerked it

out of his hand and stuffed it in the garbage.

So, with basketball season obviously over, McMurphy decided fishing was the thing. He

requested another pass after telling the doctor he had some friends at the Siuslaw Bay at Florence

who would like to take eight or nine of the patients out deep-sea fishing if it was okay with the staff,

and he wrote on the request list out in the hall that this time he would be accompanied by “two

sweet old aunts from a little place outside of Oregon City.” In the meeting his pass was granted for

the next weekend. When the nurse finished officially noting his pass in her roll book, she reached

into her wicker bag beside her feet and drew out a clipping that she had taken from the paper that

morning, and read out loud that although fishing off the coast of Oregon was having a peak year,

the salmon were running quite late in the season and the sea was rough and dangerous. And she

would suggest the men give that some thought.

“Good idea,” McMurphy said. He closed his eyes and sucked a deep breath through his teeth.

“Yes sir! The salt smell o’ the poundin’ sea, the crack o’ the bow against the waves—braving the

elements, where men are men and boats are boats. Miss Ratched, you’ve talked me into it. I’ll call

and rent that boat this very night. Shall I sign you on?”

117

Ken Kesey one flew over the cuckoo’s nest

Instead of answering she walked to the bulletin board and pinned up the clipping.

The next day he started signing up the guys that wanted to go and that had ten bucks to chip in

on boat rent, and the nurse started steadily bringing in clippings from the newspapers that told

about wrecked boats and sudden storms on the coast. [178] McMurphy pooh-poohed her and her

clippings, saying that his two aunts had spent most of their lives bouncing around the waves in one

port or another with this sailor or that, and they both guaranteed the trip was safe as pie, safe as

pudding, not a thing to worry about. But the nurse still knew her patients. The clippings scared them

more than McMurphy’d figured. He’d figured there would be a rush to sign up, but he’d had to talk

and wheedle to get the guys he did. The day before the trip he still needed a couple more before he

could pay for the boat.

I didn’t have the money, but I kept getting this notion that I wanted to sign the list. And the

more he talked about fishing for Chinook salmon the more I wanted to go. I knew it was a fool

thing to want; if I signed up it’d be the same as coming right out and telling everybody I wasn’t deaf.

If I’d been hearing all this talk about boats and fishing it’d show I’d been hearing everything else

that’d been said in confidence around me for the past ten years. And if the Big Nurse found out

about that, that I’d heard all the scheming and treachery that had gone on when she didn’t think

anybody was listening, she’d hunt me down with an electric saw, fix me where she knew I was deaf

and dumb. Bad as I wanted to go, it still made me smile a little to think about it: I had to keep on

acting deaf if I wanted to hear at all.

I lay in bed the night before the fishing trip and thought it over, about my being deaf, about the

years of not letting on I heard what was said, and I wondered if I could ever act any other way again.

But I remembered one thing: it wasn’t me that started acting deaf; it was people that first started

acting like I was too dumb to hear or see or say anything at all.

It hadn’t been just since I came in the hospital, either; people first took to acting like I couldn’t

hear or talk a long time before that. In the Army anybody with more stripes acted that way toward

me. That was the way they figured you were supposed to act around someone looked like I did. And

even as far back as grade school I can remember people saying that they didn’t think I was listening,

so they quit listening to the things I was saying. Lying there in bed, I tried to think back when I first

noticed it. I think it was once when we were still living in the village on the Columbia. It was

summer. ...

… and I’m about ten years old and I’m out in front of the shack sprinkling salt on salmon for the

racks behind the house, when I see a car turn off the highway and come lumbering across the ruts

through the sage, towing a load of red dust behind it as solid as a string of boxcars.

[179] I watch the car pull up the hill and stop down a piece from our yard, and the dust keeps

coming, crashing into the rear of it and busting in every direction and finally settling on the sage and

soapweed round about and making it look like chunks of red, smoking wreckage. The car sits there

while the dust settles, shimmering in the sun. I know it isn’t tourists with cameras because they

never drive this close to the village. If they want to buy fish they buy them back at the highway; they

don’t come to the village because they probably think we still scalp people and burn them around a

post. They don’t know some of our people are lawyers in Portland, probably wouldn’t believe it if I

told them. In fact, one of my uncles became a real lawyer and Papa says he did it purely to prove he

could, when he’d rather poke salmon in the fall than anything. Papa says if you don’t watch it people

will force you one way or the other, into doing what they think you should do, or into just being

mule-stubborn and doing the opposite out of spite.

The doors of the car open all at once and three people get out, two out of the front and one out

of the back. They come climbing up the slope toward our village and I see the first two are men in

blue suits, and the behind one, the one that got out of the back, is an old white-haired woman in an

118

Ken Kesey one flew over the cuckoo’s nest

outfit so stiff and heavy it must be armor plate. They’re puffing and sweating by the time they break

out of the sage into our bald yard.

The first man stops and looks the village over. He’s short and round and wearing a white Stetson

hat. He shakes his head at the rickety clutter of fishracks and secondhand cars and chicken coops

and motorcycles and dogs.

“Have you ever in all your born days seen the like? Have you now? I swear to heaven, have you

ever?”

He pulls off the hat and pats his red rubber ball of a head with a handkerchief, careful, like he’s

afraid of getting one or the other mussed up—the handkerchief or the dab of damp stringy hair.

“Can you imagine people wanting to live this way? Tell me, John, can you?” He talks loud on

account of not being used to the roar of the falls.

John’s next to him, got a thick gray mustache lifted tight up under his nose to stop out the smell

of the salmon I’m working on. He’s sweated down his neck and cheeks, and he’s sweated clean out

through the back of his blue suit. He’s making notes in a book, and he keeps turning in a circle,

looking at our shack, our little garden, at Mama’s red and green and yellow Saturday-night dresses

drying out back on a stretch [180] of bedcord—keeps turning till he makes a full circle and comes

back to me, looks at me like he just sees me for the first time, and me not but two yards away from

him. He bends toward me and squints and lifts his mustache up to his nose again like it’s me

stinking instead of the fish.

“Where do you suppose his parents are?” John asks. “Inside the house? Or out on the falls? We

might as well talk this over with the man while we’re out here.”

“I, for one, am not going inside that hovel,” the fat guy says.

“That hovel,” John says through his mustache, “is where the Chief lives, Brickenridge, the man

we are here to deal with, the noble leader of these people.”

“Deal with? Not me, not my job. They pay me to appraise, not fraternize.”

This gets a laugh out of John.

“Yes, that’s true. But someone should inform them of the government’s plans.”

“If they don’t already know, they’ll know soon enough.”

“It would be very simple to go in and talk with him.”

“Inside in that squalor? Why, I’ll just bet you anything that place is acrawl with black widows.

They say these ‘dobe shacks always house a regular civilization in the walls between the sods. And

hot, lord-a-mercy, I hope to tell you. I’ll wager it’s a regular oven in there. Look, look how overdone

little Hiawatha is here. Ho. Burnt to a fair turn, he is.”

He laughs and dabs at his head and when the woman looks at him he stops laughing. He clears

his throat and spits into the dust and then walks over and sits down in the swing Papa built for me

in the juniper tree, and sits there swinging back and forth a little bit and fanning himself with his

Stetson.

What he said makes me madder the more I think about it. He and John go ahead talking about

our house and village and property and what they are worth, and I get the notion they’re talking

about these things around me because they don’t know I speak English. They are probably from the

East someplace, where people don’t know anything about Indians but what they see in the movies. I

think how ashamed they’re going to be when they find out I know what they are saying.

I let them say another thing or two about the heat and the house; then I stand up and tell the fat

man, in my very best schoolbook language, that our sod house is likely to be cooler than any one of

the houses in town, lots cooler! “I know for a fact that it’s cooler’n that school I go to and even

cooler’n that movie house in The Dalles that advertises on that sign drawn with icicle letters that it’s

‘cool inside’!”

119

Ken Kesey one flew over the cuckoo’s nest

[181] And I’m just about to go and tell them, how, if they’ll come on in, I’ll go get Papa from the

scaffolds on the falls, when I see that they don’t look like they’d heard me talk at all. They aren’t

even looking at me. The fat man is swinging back and forth, looking off down the ridge of lava to

where the men are standing their places on the scaffolding in the falls, just plaidshirted shapes in the

mist from this distance. Every so often you can see somebody shoot out an arm and take a step

forward like a swordfighter, and then hold up his fifteen-foot forked spear for somebody on the

scaffold above him to pull off the flopping salmon. The fat guy watches the men standing in their

places in the fifty-foot veil of water, and bats his eyes and grunts every time one of them makes a

lunge for a salmon.

The other two, John and the woman, are just standing. Not a one of the three acts like they heard

a thing I said; in fact they’re all looking off from me like they’d as soon I wasn’t there at all.

And everything stops and hangs this way for a minute.

I get the funniest feeling that the sun is turned up brighter than before on the three of them.

Everything else looks like it usually does—the chickens fussing around in the grass on top of the

‘dobe houses, the grasshoppers batting from bush to bush, the flies being stirred into black clouds

around the fish racks by the little kids with sage flails, just like every other summer day. Except the

sun, on these three strangers, is all of a sudden way the hell brighter than usual and I can see the ...

seams where they’re put together. And, almost, see the apparatus inside them take the words I just

said and try to fit the words in here and there, this place and that, and when they find the words

don’t have any place ready-made where they’ll fit, the machinery disposes of the words like they

weren’t even spoken.

The three are stock still while this goes on. Even the swing’s stopped, nailed out at a slant by the

sun, with the fat man petrified in it like a rubber doll. Then Papa’s guinea hen wakes up in the

juniper branches and sees we got strangers on the premises and goes to barking at them like a dog,

and the spell breaks.

The fat man hollers and jumps out of the swing and sidles away through the dust, holding his hat

up in front of the sun so’s he can see what’s up there in the juniper tree making such a racket. When

he sees it’s nothing but a speckled chicken he spits on the ground and puts his hat on.

[182] “I, myself, sincerely feel,” he says, “that whatever offer we make on this ... metropolis will be

quite sufficient.”

“Could be. I still think we should make some effort to speak with the Chief—”

The old woman interrupts him by taking one ringing step forward. “No.” This is the first thing

she’s said. “No,” she says again in a way that reminds me of the Big Nurse. She lifts her eyebrows

and looks the place over. Her eyes spring up like the numbers in a cash register; she’s looking at

Mamma’s dresses hung so careful on the line, and she’s nodding her head.

“No. We don’t talk with the Chief today. Not yet. I think . that I agree with Brickenridge for

once. Only for a different reason. You recall the record we have shows the wife is not Indian but

white? White. A woman from town. Her name is Bromden. He took her name, not she his. Oh, yes,

I think if we just leave now and go back into town, and, of course, spread the word with the

townspeople about the government’s plans so they understand the advantages of having a
[truncated: 218,189 more chars]
