# Supplementary material
Source: ML conference proceedings conference paper supplement (https://openreview.net/forum?id=Sxi6gBtJcI)
Supplement: supplementary_material [file Red-Sparrow_Matthews_-novel.docx]

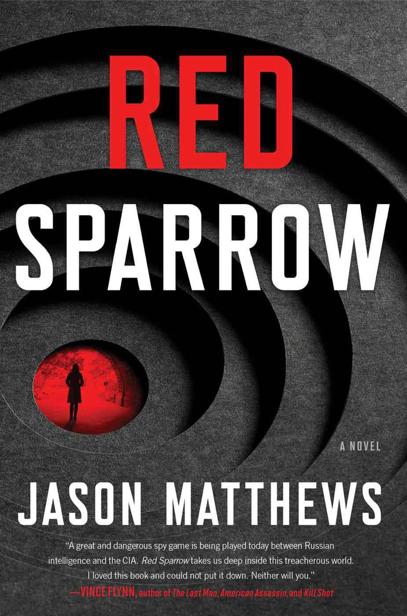


Table of Contents

[Chapter 1](#Top_of_index_split_004_html)

[Chapter 2](#Top_of_index_split_005_html)

[Chapter 3](#Top_of_index_split_006_html)

[Chapter 4](#Top_of_index_split_007_html)

[Chapter 5](#Top_of_index_split_008_html)

[Chapter 6](#Top_of_index_split_009_html)

[Chapter 7](#Top_of_index_split_010_html)

[Chapter 8](#Top_of_index_split_011_html)

[Chapter 9](#Top_of_index_split_012_html)

[Chapter 10](#Top_of_index_split_013_html)

[Chapter 11](#Top_of_index_split_014_html)

[Chapter 12](#Top_of_index_split_015_html)

[Chapter 13](#Top_of_index_split_016_html)

[Chapter 14](#Top_of_index_split_017_html)

[Chapter 15](#Top_of_index_split_018_html)

[Chapter 16](#Top_of_index_split_019_html)

[Chapter 17](#Top_of_index_split_020_html)

[Chapter 18](#Top_of_index_split_021_html)

[Chapter 19](#Top_of_index_split_022_html)

[Chapter 20](#Top_of_index_split_023_html)

[Chapter 21](#Top_of_index_split_024_html)

[Chapter 22](#Top_of_index_split_025_html)

[Chapter 23](#Top_of_index_split_026_html)

[Chapter 24](#Top_of_index_split_027_html)

[Chapter 25](#Top_of_index_split_028_html)

[Chapter 26](#Top_of_index_split_029_html)

[Chapter 27](#Top_of_index_split_030_html)

[Chapter 28](#Top_of_index_split_031_html)

[Chapter 29](#Top_of_index_split_032_html)

[Chapter 30](#Top_of_index_split_033_html)

[Chapter 31](#Top_of_index_split_034_html)

[Chapter 32](#Top_of_index_split_035_html)

[Chapter 33](#Top_of_index_split_036_html)

[Chapter 34](#Top_of_index_split_037_html)

[Chapter 35](#Top_of_index_split_038_html)

[Chapter 36](#Top_of_index_split_039_html)

[Chapter 37](#Top_of_index_split_040_html)

[Chapter 38](#Top_of_index_split_041_html)

[Chapter 39](#Top_of_index_split_042_html)

[Chapter 40](#Top_of_index_split_043_html)

[Chapter 41](#Top_of_index_split_044_html)

[Chapter 42](#Top_of_index_split_045_html)

[Acknowledgments](#Top_of_index_split_046_html)

[About Jason Matthews](#Top_of_index_split_047_html)


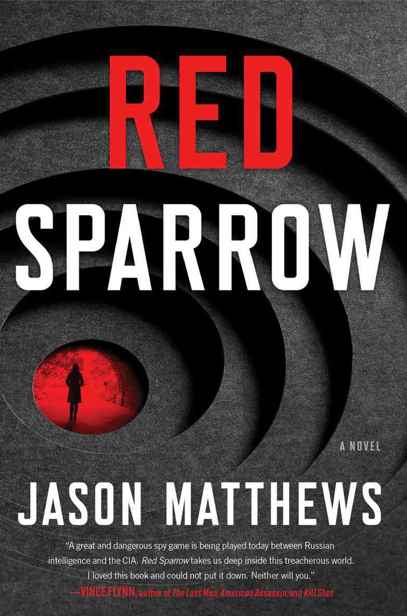


Thank you for downloading this Scribner eBook.

Join our mailing list and get updates on new releases, deals, bonus content and other great books from Scribner and Simon & Schuster.

[CLICK HERE TO SIGN UP](http://eBookNews.SimonandSchuster.com/front/9781476706146)

or visit us online to sign up at
[eBookNews.SimonandSchuster.com](http://eBookNews.SimonandSchuster.com/front/9781476706146)


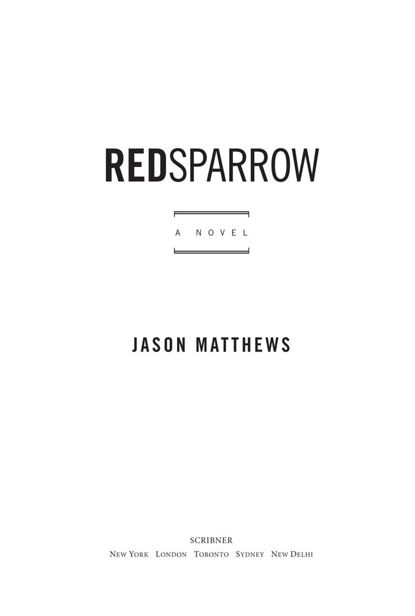


To Suzanne, Alexandra, and Sophia

1

Twelve hours into his SDR Nathaniel Nash was numb from the waist down. His feet and legs were wooden on the cobblestones of the Moscow side street. It had long since gotten dark as Nate ran the surveillance detection route designed to tickle the belly hairs of surveillance, to stretch them, to get them excited enough to show themselves. There was nothing, not a hint of units swirling, leapfrogging, banging around corners on the streets behind him, no reaction to his moves. Was he black? Or was he being had by a massive team? In the nature of The Game, not seeing coverage felt worse than confirming you were covered in ticks.

Early September, but it had snowed between the first and third hours of his SDR, which had helped cover his car escape. Late that morning, Nate bailed out of a moving Lada Combi driven by Leavitt from the Station, who, as he calculated the gap, wordlessly held up three fingers as they turned a corner onto an industrial side street, then tapped Nate’s arm. FSB trailing surveillance, the Federal Security Service, didn’t catch the escape in the three-second interval and blew past Nate hiding behind a snowbank, Leavitt leading them away. Nate left his active cover cell phone from the Embassy economic section with Leavitt in the car—the FSB were welcome to track the phone between Moscow’s cell towers for the next three hours. Nate had banged his knee on the pavement when he rolled, and it had stiffened up in the first hours, but now it was as numb as the rest of him. As night fell, he had walked, slid, climbed, and scrambled over half of Moscow without detecting surveillance. It felt like he was in the clear.

Nate was one of a small group of CIA “internal ops” officers trained to operate under surveillance on the opposition’s home ground. When he was on the street working against them, there was no doubt, no introspection. The familiar fear of failing, of not excelling, disappeared. Tonight he was running hot and cool, working well. Ignore the cold that wraps around your chest, pushing tight. Stay in the sensory bubble, let it expand under the stress. His vision was acute. Focus on the middle distance, look for repeat pedestrians and vehicles. Mark colors and shapes. Hats, coats, vehicles. Without thinking much about it, he registered the sounds of the darkening city around him. The zing of the electric buses running on the overhead wires, the hiss of car tires on wet pavement, the crackling of coal dust underfoot. He smelled the bitterness of diesel fumes and burning coal in the air and, from some unseen exhaust vent, the loamy aroma of beet soup cooking. He was a tuning fork resonating in the frosty air, keyed and primed, but strangely calm. After twelve hours he was as sure as he could be: He was black.

Time check: 2217. Twenty-seven-year-old Nate Nash was two minutes away from meeting the legend, the jewel in the tiara, the most valuable asset in CIA’s stable. Only three hundred meters from the quiet street where he would meet MARBLE: sophisticated, urbane, in his sixties, major general in the SVR, which was the successor to the KGB’s First Chief Directorate, the Russian Foreign Intelligence Service, the Kremlin’s overseas spies. MARBLE had been in harness for fourteen years, a remarkable run considering that Cold War Russian sources survived an average of eighteen months. The grainy photos of history’s lost agents clicked behind Nate’s eyes as he scanned the street: Penkovsky, Motorin, Tolkachev, Polyakov, all the others, all gone. Not this one, not on my watch. He would not fail.

MARBLE was now chief of the Americas Department in the SVR, a position of colossal access, but he was old-school KGB, had earned his spurs (and general’s star) during an overseas career spectacular not only for its operational triumphs, but also because MARBLE had survived the purges and reforms and internal power struggles. He did not delude himself as to the nature of the system he was serving, and he had grown to loathe the charade, but he was a professional and loyal. When he was forty, already a colonel and serving in New York, the Center refused permission to take his wife to an American oncologist, a mindless display of Soviet intransigence, and she died instead on a gurney in a Moscow hospital corridor. It took MARBLE another eight years to decide, to prepare a secure approach to the Americans, to volunteer.

As he became a foreign spy—an agent, in intelligence lexicon—MARBLE quietly and with courtly grace had spoken softly to his CIA case officers—his handlers—apologizing self-deprecatingly for the meager information he reported. Langley was stunned. Here was incalculably valuable intelligence on KGB and SVR operations, penetrations of foreign governments, and, occasionally, when he could, the crown jewels: the names of Americans spying for Russia. He was an uncommon, inestimable asset.

2218. Nate rounded the corner and started down the narrow street, apartment buildings on either side, the uneven sidewalk lined with trees now bare and blown with snow. At the far end of the street, silhouetted in the light from the intersection beyond, a familiar shape turned the corner and began walking toward him. The old man was a pro: He had nailed the four-minute window.

Nate’s fatigue fell away and he could feel himself rev up. As MARBLE approached, Nate automatically scanned the empty street for anomalies. No cars. Look up. No windows open, apartments dark. Look back. Cross streets quiet. Scan the shadows. No street sweeper, no lolling bum. A mistake, despite all the hours of his SDR, of provocative maneuvers, of waiting and watching in the snow and cold, a single mistake would have one inescapable result—the death of MARBLE. Not, to Nate, so much the loss of a source of intelligence or the beginning of a diplomatic flap, but the death of this man. Nate would not fail.

MARBLE walked unhurriedly forward. They had met twice before. MARBLE had been assigned a succession of CIA handlers—had educated every one. Some of them had been accomplished. In a few MARBLE had suspected galloping stupidity. And one or two had displayed a terrifying langueur, a potentially fatal disinterest in being professional. Nate was different, interesting. There was something, an edge, a focus, an aggression in pursuit of doing the thing correctly. A little raw—a little compulsive, MARBLE thought—but not many had the fire, and MARBLE approved.

MARBLE’s eyes narrowed with pleasure at seeing the young American. Nate was average height and thin-framed, with straight black hair over a straight nose and brown eyes that kept moving, glancing over the older man’s shoulder as he approached, watchful rather than jittery.

“Good evening, Nathaniel,” said MARBLE. Slight British accent from the assignment in London, leavened by his time in New York. A whim to use English, to be closer to his case officer, despite Nate’s nearly fluent Russian. MARBLE was short and stocky, with deep brown eyes separated by a fleshy nose. He had bushy white eyebrows, which matched his full head of wavy white hair, giving him the appearance of an elegant boulevardier.

They were supposed to use aliases, but that was ridiculous. MARBLE had access to the SVR foreign diplomatic mug book and knew Nate’s name perfectly well. “It’s good to see you. Are you well?” MARBLE looked carefully at Nate’s face. “Are you tired? How many hours did you spend tonight?” MARBLE’s questions were perfectly polite, but he still wanted to know. He never took anything for granted.

“Dobryj vecher, dyadya,” said Nate. He had begun using the familiar “uncle,” part tradecraft to show respect, part a display of real affection. He checked his watch. “It’s been twelve hours. The street feels loose.” A patois they both understood, and Nate knew MARBLE was checking to hear how thorough his SDR had been.

MARBLE did not comment. The two began walking together in the shadows cast by the trees along the sidewalk. The air was frosty, still, there was no wind. They had approximately seven minutes for the meeting.

Nate let MARBLE do most of the talking, and he listened carefully. The older man spoke quickly but without haste, a mix of gossip and politics in MARBLE’s service, who was up, who was down. A summary of a new operation, a successful SVR recruitment in a foreign country. Details would be on the discs. This was as much a conversation between two human beings as a debriefing. The sounds of their voices, the eye contact, MARBLE’s low chuckle. That was the point.

As they walked they both resisted a natural impulse to link arms, like father and son. They both knew there could be no contact, a bitter necessity, for fear of contamination with metka, spy dust. MARBLE himself had reported on the secret program to pollinate suspect CIA officers in the US Embassy in Moscow. Yellow, yeasty, powdery, the chemical compound nitrophenylpentadienal, NPPD. Pockmarked Russian techs squeezed the rubber bulbs and it was spritzed on clothing, floor mats, steering wheels. NPPD was designed to spread like sticky pollen from a daffodil, from a handshake to a sheet of paper to a coat lapel. It would invisibly mark anything an American CIA officer touched. Therefore, if you were a Russian official under suspicion and your hands or clothes or desk blotter fluoresced with NPPD, you were cooked. MARBLE had traumatized Langley by subsequently reporting that different batches of metka were tagged with distinct marking compounds that could identify the specific American host.

As they walked and spoke, Nate reached into his pocket, pulled out a sealed plastic bag. Replacement batteries for MARBLE’s covert communications equipment: three steel-gray cigarette packs, inordinately heavy. They used covcom to transmit fast-breaking news and to keep contact warm during the gaps between personal meetings. But these brief encounters, mortally risky, were infinitely more productive. It was during these that MARBLE passed volumes of intelligence on discs or drives, and equipment and rubles were replenished. And there was the human contact, the opportunity to exchange a few words, time to renew the almost religious partnership.

Nate carefully opened the plastic bag and held it out to MARBLE, who reached in and extracted the prewrapped brick of batteries, which had been packed in a sterile lab in Virginia. MARBLE then dropped two discs into the bag. “I estimate there are about five linear meters of files on those discs,” he said. “With my compliments.”

Nate noted that the old spook still thought in terms of linear feet of file folders even as he was stealing digital secrets. “Thank you. Did you include the summary?” The intel hacks had begged Nate to remind MARBLE to include a summary of the take, to prioritize translation and processing of his raw reports.

“Yes, this time I remembered. I have also included a new office directory in the second disc. A few changes of personnel, nothing too startling. And a schedule of my foreign travel plans for the next year. I am looking for operational reasons to travel, I included the details,” he said, nodding at the disc in the bag.

“I look forward to seeing you outside Moscow,” said Nate, “at your leisure.” Time was ticking and the two had already reached the end of the street, had turned and were walking slowly back to the other end.

MARBLE grew pensive. “You know, I have been thinking about my career, about my relationship with my American friends, about life ahead of me,” he said. “I probably have several more years before retiring. Politics, old age, the unthinkable mistake. Perhaps three or four, perhaps two years. I sometimes think it would be pleasant to retire in New York City. What do you think of that, Nathaniel?” Nate paused and half turned toward him. What was this? His street hum faded. Was his agent in trouble? MARBLE raised his hand as if to squeeze Nate’s arm, but stopped it in midair. “No alarm, please, I’m just thinking out loud.” Nate looked sideways at MARBLE: The old man was confident, calm. It was natural for an agent to think about retiring, to dream about the end to the danger and the double life, to stop listening for the knock on the door. The Life eventually causes great fatigue, and that leads to mistakes. Was there fatigue in MARBLE’s voice? Nate would have to report the nuances of this conversation carefully in his ops cable tomorrow. Inexorably, problems in a case always rebounded to the handling officer, problems he didn’t need.

“Is there anything wrong, a security problem?” said Nate. “You know your bank account is waiting for you. You can retire anywhere you want. We support you in every way.”

“No, I’m fine. We have more work to do. Then we can rest,” said MARBLE.

“It is an honor working with you,” said Nate, and he meant it. “Your contribution is impossible to measure.” The older man looked down at the sidewalk as they walked along the darkened street. Their meeting was stretching now to six minutes. It was time to go.

“Is there anything you need?” asked Nate. He closed his eyes and concentrated. Batteries passed, discs received, summary included, foreign travel schedule. The only thing remaining was to schedule the next personal meeting three months from now. “Shall we meet again in three months?” asked Nate. “It will be dead winter by then, December. The new site, EAGLE, near the river?”

“Yes, of course,” said MARBLE. “Orel. I will confirm in a message the week before.” They were approaching the end of the street again, moving slowly toward the brighter lights of the intersection. A neon sign marked a Metro station entrance across the street. Nate suddenly felt a wash of alarm running up his back.

A battered Lada sedan cruised slowly through the intersection, two men in the front seat. Nate and MARBLE flattened themselves against the wall of a building, completely in shadow. MARBLE had seen the car too, the old man was every bit the street pro as his young handler. Another car, a newer Opel, crossed in the opposite direction. Two men inside were looking the other way. Glancing behind him, Nate saw a third car slowly turning into the street. It was running only with its parking lights.

“It’s a sweep search,” hissed MARBLE. “You didn’t park a vehicle nearby, did you?”

Nate shook his head no. No, no, fuck no. His heart was pounding. This was going to be a close thing. He looked at MARBLE for a beat, then the two of them moved as one. Forgetting spy dust, forgetting everything else, Nate helped MARBLE take off his dark overcoat, turning it inside out as he pulled it off his arms, transformed into a light-colored coat of a different cut, stained and frayed at the sleeves and hem. Nate helped MARBLE shrug it on. Reaching into an inside coat pocket, Nate unfolded a moth-eaten fur hat—a part of his own disguise—and jammed it on MARBLE’s bare head. MARBLE took heavy-rimmed eyeglasses, one stem wrapped with white tape, out of his front pocket and put them on. Nate reached into another pocket and removed a short staff that he shook lightly downward. An elastic cord inside the staff snapped the three lengths together to create a cane that he thrust into MARBLE’s hand.

The middle-aged Muscovite was gone, replaced in eight seconds by a creaky old pensioner wearing a cheap cloth coat and hobbling along with a cane. Nate pushed him gently in the direction of the intersection and the Metro station. This action defied the catechism, it was dangerous to use the Metro, to trap oneself underground, but if MARBLE could get away from the area, the risk was worth it. His disguise would have to be enough against the multiple surveillance cameras on the platforms.

“I’ll get them away from here,” said Nate, as MARBLE bent over and began shuffling to cross the intersection. The old spook looked at him once, grave but cool, and winked. This guy is a legend, thought Nate. But now his only priority was to distract the surveillance cars and get them to start vectoring on him, away from MARBLE. He must not be detained, however. MARBLE’s discs in his pocket would kill the old man as surely as if surveillance arrested him.

Not on his watch. The icy burn started in his head and throat. The collar of his coat was up, and his guts were set, and he quickly crossed in front of the surveillance car slowly cruising up the street toward him half a block away. This would be the FSB, the thugs working internal espionage inside the Russian Federation. Their turf.

The 1200cc Lada engine screamed and they caught him in the reflected light of the high beams off the glistening street, and he ran to the next block, ducked into a basement stairwell that reeked of urine and vodka, and behind him came the sound of wailing tires, so, Wait, wait, now move again, sprinting through alleyways, ghosting across pedestrian overpasses, pounding down stairs to the river. Use barriers, cross railroad tracks, change vector and direction once out of physical sight, make them guess wrong, squeeze past their picket line. Time check: nearly two hours.

He was shaking with fatigue and he ran, then walked, then crouched behind parked cars, hearing engine noises all around him as they converged, then spread out, then converged again, trying to get close enough to see his face, close enough to tackle him facedown in the street, to jam their hands into his pockets. He could hear the squelch breaks, hear them yelling into their radios, they were getting desperate.

His first surveillance instructor had told him, You will feel the street, Mr. Nash, it doesn’t matter whether it’s Wisconsin Avenue or Tverskaya, you will feel it, and Nate was fucking feeling it, but there were a lot of them, even if they did not know exactly where he was. Car tires squealed on the wet cobblestones as they sped back and forth, and the good news was that they didn’t have enough of him yet to deploy feet, and the bad news was that time was on their side. Thank God they were beating up on him, which meant they had not focused on MARBLE. Nate said a prayer, that the old man had been missed as he limped into the Metro, and that this surveillance had not been on him from the beginning, because that would mean that a second team was now following MARBLE. They weren’t getting his agent, his agent, and they weren’t getting the package of MARBLE’s discs, volatile as nitro in his pocket. The squealing tires died away and the streets were quiet.

Time check: Two-plus hours, leg- and spine-weary, with vision gray around the edges, and he went down a narrow alleyway, hugging the wall in the shadows, hoping they were gone, imagining the dented cars all back in the garage, ticking hot metal and dripping mud, while the team leader screamed at them in the ready room. Nate hadn’t seen a car in several minutes, and he thought he had slipped outside their search perimeter. It had started snowing again.

Up ahead a vehicle screeched to a stop, then reversed and turned into the alley, its headlights catching the snow. Nate turned toward the wall, trying to reduce his outline and the contrasts, but he knew they must have seen him, and as the lights swept over Nate the car accelerated toward him, edging over to his side of the alley. Nate watched in fascinated disbelief as the car kept coming, its passenger-side door inches away from the wall and the two intent faces straining forward, wipers going full tilt. These FSB animals, didn’t they see him? Then he realized they saw him perfectly well, they were trying for a wall smear. It is an unwritten rule that surveillance teams following a foreign diplomat never, ever offer violence to a target, the instructors had said, and really, seriously, what the fuck were these guys doing? He looked back and saw the entrance to the alley was too far away.

Feel the street, Mr. Nash, and the second-best option was feeling the cast-iron drainpipe running down the building a foot away from him with the rusty metal straps bolted to the brickwork, and as the car bore down, he leapt up and grabbed the drainpipe, using the metal fasteners to clamber higher, and the car slammed into the wall, splintering the drainpipe, the car’s roof just below Nate’s lifted-up legs. With a heavy grinding sound, the car scraped along the wall and came to a stop. They had stalled the engine, and his grip was gone, and Nate fell onto the roof of the car and then to the pavement. The driver’s door was opening, a big man in a fur hat was getting out, but they never, ever offer violence to a target and Nate shouldered the door back onto the head and neck of the thug, heard a scream, saw a face contorted with pain. Nate slammed the door on his head two more times, very quickly, and the man fell back into the car. The passenger door was pinned shut by the wall and Nate could see the other goon trying to climb over the front seat to get at the rear door, so it was time to run again and Nate sprinted down the alley into the shadows and around the corner.

Three doors down was a grimy soup kitchen, open at this late hour, its lights spilling onto the snowy sidewalk. Nate could hear the car in the alleyway backing up, engine whining. He ducked into the tiny, empty restaurant and closed the door. A single room, nothing more than a service counter at one end with several well-worn wooden tables and benches, stained wallpaper, and grimy lace curtains over the window. An old woman with two can-opener teeth sat behind the counter listening to a scratchy radio and reading a paper. Two battered aluminum pots of soup simmered on electric rings behind her. The aroma of cooked onions filled the room.

Fighting to keep his hands from shaking, Nate walked up to the counter, and in Russian ordered a bowl of beet soup to the woman’s blank stare. He sat with his back to the curtained window and listened. A car roared by, then another, then nothing. On the radio a comedian was telling a joke:

Khrushchev visited a pig farm and was photographed there. In the village newspaper office there was a heated discussion about the photo caption. “Comrade Khrushchev among Pigs”? “Comrade Khrushchev and Pigs”? “Pigs around Comrade Khrushchev”? None will do. The editor finally makes a decision: “Third from left—Comrade Khrushchev.” The old lady behind the counter cackled.

He had not eaten or drunk anything in more than twelve hours, and he began wolfing down the thick soup with a shaking spoon. The old woman stared at him, got up, and walked around the counter to the front door. Nate watched her out of the corner of his eye. She opened the door and he felt the blast of cold outside air. The old woman looked out at the street, up and down the block, then slammed the door shut. She returned to her stool behind the counter and picked up her paper. When Nate finished his soup and bread, he walked up to the counter and counted out a few kopeks. The crone gathered the coins and swept them into a drawer. She slammed the drawer and looked at Nate. “All clear,” she said. “Go with God.” Nate avoided looking at her and left.

In another hour, drenched with sweat and trembling with fatigue, Nate stumbled past the militiaman’s booth at the front entrance to the Embassy housing compound. MARBLE’s discs were finally safe. It was not the approved way to end an operational night, but he had missed by hours the pickup in the Station car. His entry was noted, and within a half hour the FSB, and instantly after that the SVR, knew that it was young Mr. Nash of the Embassy’s Economic Section who had been out of pocket for most of the evening. And they thought they knew why.

OLD LADY’S BEET SOUP

Melt butter in a large pot; add a chopped onion and sauté until translucent; stir in three grated beets and one chopped tomato. Pour in beef stock, vinegar, sugar, salt, and pepper. Broth should be tart and sweet. Bring to a boil, then simmer for an hour. Serve hot with a dollop of sour cream and chopped dill.

2

The next morning, at opposite ends of Moscow, in two separate offices, there was unpleasantness. At SVR headquarters in Yasenevo, First Deputy Director Ivan (Vanya) Dimitrevich Egorov was reading the FSB surveillance logs from the previous night. Watery sunlight filtered through massive plate-glass windows overlooking the dark pine forest that surrounded the building. Alexei Zyuganov, Egorov’s diminutive Line KR counterintelligence chief, stood in front of his desk, not having been invited to sit down. Zyuganov’s close friends, or perhaps just his mother, called the poisonous dwarf “Lyosha,” but not this morning.

Vanya Egorov was sixty-five years old, a major general with seniority. He had a large head with tufts of graying hair over the ears, but otherwise he was bald. His wide-set brown eyes, fleshy lips, broad shoulders, ample belly, and large muscular hands gave him the look of a circus strongman. He wore a beautifully cut dark winter-weight suit, an Augusto Caraceni from Milan, with a somber dark blue necktie. His shoes, glossy black, were Edward Green of London, out of the dip pouch.

Egorov had been an average KGB field officer in the early years of his career. Several tepid tours in Asia convinced him that life in the field was not his preference. Once back in Moscow, he excelled in the internecine politics of the organization. He mastered a succession of high-profile internal jobs, first in planning positions, then in administration, and finally in the newly created Inspector General’s position. He was active and prominent in the changeover from KGB to SVR in 1991, chose the right side during Kryuchkov’s abortive 1992 KGB coup against Gorbachev, and in 1999 was noticed by the phlegmatic First Deputy Prime Minister Vladimir Vladimirovich Putin, a blond scorpion with languid blue eyes. The next year Yeltsin was out and Putin was, remarkably, implausibly, in the Kremlin, and Vanya Egorov waited for the call he knew must come.

“I want you to look after things,” Putin had then told him in a heady five-minute interview in the elegant Kremlin office, the rich wood of the walls eerily reflected in the new president’s eyes. They both knew what he meant, and Vanya went back to Yasenevo first as Third Deputy Director, then Second, until last year, when he moved into the First Deputy Director’s office, across the carpeted hallway from the Director’s suite.

There had been some anxiety leading up to the elections last March, the goddamn journalists and opposition parties unfettered as never before. The SVR had looked after some dissidents, had discreetly operated at polling places, and had reported on select opposition parliamentarians. A cooperative oligarch had been directed to form a splinter party to siphon off votes and fracture the field.

Then Vanya himself had risked everything, had really taken a chance, when he personally suggested that Putin blame Western—specifically US—interference for the demonstrations leading up to the elections. The candidate loved the suggestion, eyes unblinking, as he contemplated Russia’s comeback on the world stage. He had clapped Vanya on the back. Perhaps it was because their careers so resembled each other, perhaps because they both had accomplished little as intel officers during brief overseas assignments, or perhaps one informant recognized a fellow nashnik. Whatever it was, Putin liked him, and Vanya Egorov knew he would be rewarded. He was close to the top. He had the time, and the power, to continue to advance. It was what he wanted.

But the handler at a snake farm inevitably is bitten unless he exercises great care. Today’s Kremlin was suits and ties, press secretaries, smiling summit meetings, but anyone who had been around for any length of time knew that nothing had changed since Stalin, really. Friendship? Loyalty? Patronage? A misstep, an operational or diplomatic failure, or, worst of all, embarrassing the president, would bring the burya, the tempest, from which there would be no shelter. Vanya shook his head. Chert vozmi. Shit. This Nash episode was exactly what he didn’t need.

“Could surveillance have been more poorly managed?” Egorov raged. He was generally given to mild theatrics in front of his subordinates. “It’s obvious this little prick Nash met with a source last night. How could he have been out of pocket for more than twelve hours? What was surveillance doing in that district in the first place?”

“It appears they were looking for Chechens doing drug deals. God knows what the FSB is doing these days,” said Zyuganov. “That district, it’s a shithole down there.”

“And what about the crash in the alley? What was that?”

“It’s not clear. They claim the team thought they had cornered a Chechen and believed he was armed. I doubt it. They may have gotten excited in the chase.”

“Kolkhozniki. Peasants could do it better. I’ll have the director mention it to the president next Monday. We cannot have foreign diplomats harmed on the streets, even if they are meeting with Russian traitors,” said Egorov with a snort. “The FBI will start mugging our officers in Georgetown if this happens again.”

“I will pass the word too, at my level, General. The surveillance teams will get the message, especially, if I may suggest, if some time at katorga could be arranged.”

Egorov looked at his CI chief blankly, noting that he used the czarist name for gulag with wet-lipped relish. Jesus. Alexei Zyuganov was short and dark, with a fry-pan-flat face and prominent ears. Tent-peg teeth and a perpetual smirk completed the Lubyanka look. Still, Zyuganov was thorough, a malevolent minion who had his uses.

“We can criticize the FSB, but I tell you this, this American is meeting someone important. And those idiots just missed him, I’m sure of it.” Egorov threw the report on his desk. “So, can you guess what your job is going to be from this point onward?” He paused. “Find. Out. Who. It. Is.” Each word was punctuated with a tap on Egorov’s desk with a thick index finger. “I want that traitor’s head in a wicker basket.”

“I’ll make it a priority,” said Zyuganov, knowing that without more to go on, or without a specific lead from a mole inside the CIA, or without a break on the street, they would have to wait. In the meantime he could begin a few investigations, conduct an interrogation, just for art’s sake.

Egorov looked again at the surveillance report, a futile piece of work. The only confirmed fact was the identification of Nathaniel Nash at the Embassy gate. No sighting or description of anyone else. The driver of one of the surveillance cars (a photo of him with a sticking plaster over his left eye was included in the report, as if to justify the incident in the alley) positively identified Nash, as did the militiaman at the US Embassy compound entrance.

This could turn sweet or sour, thought Egorov. A splashy spy case solved to his credit while mortifying the Americans, or an embarrassing debacle displeasing the Kremlin and Egorov’s testosterone-fueled patron, resulting in the sudden end of his career. Depending on the president’s ire, this could include a bunk next to that ruined oligarch Khodorkovsky in Segezha Prison Colony Number Nine.

Morbidly contemplating the potential opportunities while recognizing the political consequences, Egorov that morning had called for and read Nate’s liternoye delo, the operational file: Young, active, disciplined, good Russian. Behaves himself regarding women and alcohol. No drugs. Diligent in cover position in the Embassy Economic Section. Effective while on the street, does not telegraph his operational intent. Egorov grunted. Molokosos. Whippersnapper. He looked up at his KR chief.

The hairs growing out of Zyuganov’s brain tingled and he sensed that he had to show more enthusiasm. First Deputy Director Egorov might not be a street operator, but he was a well-known species in the SVR zoo, a politically ambitious bureaucrat.

“Mr. Deputy Director, the key to finding the bastard who is selling our secrets is to focus on this young Yankee geroy, this hero. Put three teams on him. Wrap him in onionskins. Twenty-four hours a day. Order—better yet, ask—FSB to increase coverage, let them rattle around behind him, then put our own teams out at the margins. Give him a look, then take it away. See if he’s re-casing meeting sites. There will be another meeting in three to six months, that’s certain.”

Egorov liked the bit about onionskins, he would repeat it to the Director later today.

“All right, get started, let me know what your plans are so I can brief the director on our strategy,” said Egorov, dismissing the chief with a wave.

Brief the director on our strategy, thought Zyuganov as he left the office.


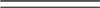


The US Embassy compound in Moscow is located northwest of Yasenevo, in the Presnensky District near the Kremlin and a sweeping bend in the Moskva River. Late that afternoon, another unpleasant conversation transpired in the office of the CIA Chief of Station, Gordon Gondorf. Much like the Line KR chief who had not been invited to sit down, Nate stood in front of Gondorf’s desk. His knee throbbed from the day before.

If Egorov’s imposing bulk made him look like a circus strongman, Gondorf’s small frame and pinched features made him look like a whippet in a circus dog act. Only about five feet six, Gondorf had thinning hair, pig’s eyes set too close together, and tiny feet. What he lacked in stature he amply made up for in venom. He trusted no one, and was unaware of the irony that he himself instilled trust in no one. Gondorf (“Gondork” behind his back) lived in a secret hell known only to a certain type of senior intelligence officer: He was in over his head.

“I read your ops report about the run last night,” said Gondorf. “Based on your write-up, I suppose you think the outcome was satisfactory?” Gondorf’s voice was flat and he spoke slowly, waveringly. Nate’s gut flipped in anticipation of the impending confrontation. Stand your ground.

“If you mean do I think the agent is safe, yes,” said Nate. He knew where Gondorf was going with this but left him to get there on his own.

“You almost got the Agency’s most prolific and important asset arrested last night. Your meeting was busted by surveillance, for Christ’s sake.”

Nate tamped down building anger. “I ran a twelve-hour SDR yesterday. The very SDR you approved. I confirmed my status. I was black when I got to the site, and so was MARBLE,” said Nate.

“How do you explain the surveillance, then?” said Gondorf. “You can’t possibly think it was random surveillance in the area. Tell me you don’t think that.” Gondorf’s voice dripped with sarcasm.

“That’s exactly what it was. There is no way they were searching for me, that bullshit in the alley, they weren’t following me from the start, no way. It was random and they reacted, no attempt to be discreet. MARBLE got away clean.” Nate registered that Gondorf wasn’t even concerned about the attempted wall smear. A different chief would have been in the ambassador’s office, raising hell, demanding the Embassy file a protest.

Switching barrels, Gondorf said, “Nonsense. The whole thing was a disaster. How could you have directed him to go down into the Metro? That’s a mousetrap. You ignored procedure when you pawed him to change his overcoat. He is supposed to do that himself. You know that! What if he’s fluorescing under a light wand right now?”

“I made the determination and the decision. I thought changing his profile and getting him out of the area was the priority. MARBLE’s a pro, he’ll know to get rid of the coat and cane. We can send him a message, I’ll verify with him at our next meeting,” said Nate. It was agony to argue this way, especially with a chief who didn’t know the street.

“There’s not going to be a next meeting. At least not with you. You’re too hot now. They ID’d you a dozen times last night, your Econ cover is gone, you’ll have half the surveillance directorate in Moscow on your ass from now on,” said Gondorf. He was visibly relishing the moment.

“They always knew this cover position. I always had coverage, you know that. I still can meet assets,” said Nate, leaning against a chair. Gondorf had a dummy hand grenade mounted on a wooden base on his desk. The plaque on it read COMPLAINT DEPARTMENT. PULL PIN FOR FASTER SERVICE.

“No, I don’t believe you can meet agents. You’re now a shit magnet,” said Gondorf.

“If they put that many resources on me we can bankrupt them,” argued Nate. “I can drain their manpower by driving all over town for the next six months. And the more coverage I get, the better we’ll be able to manipulate them.” Stand your ground.

Gondorf was unimpressed and unconvinced. This young case officer stud represented too much of a risk to him personally. Gondorf had his sights set on one of the big component jobs in Headquarters next year when he returned to Washington. It wasn’t worth the risk. “Nash, I’m recommending that your tour in Moscow be curtailed. You’re too hot and the opposition will be looking for a way to pick you off, catch your agents.” He looked up. “Don’t worry, I’ll make sure you get a good follow-on assignment.”

Nate was shocked. Even a first-tour officer knew a short-of-tour expulsion submitted by a COS—whatever the reason—could derail a career. He also was sure that Gondorf would use back channels to hint that Nate had fucked up. Nate’s unofficial reputation, his “hall file,” would take a hit, it would affect his promotions and future assignments. The old feeling of standing in black quicksand started coming back.

Nate knew the truth: He had saved MARBLE last night with quick and correct action. He looked down at Gondorf’s impassive face. They both knew what was happening and why. So to Nate there didn’t seem to be any point not to finish the conversation with a flourish. “Gondorf, you’re a gutless pussy who’s terrified of the street. You’re fucking me to avoid your responsibility. It’s been an education serving in your Station.”

As he left the office, Nate noted that the absence of a screaming tirade from his chief was indeed the measure of the man.


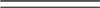


Kicked out of Station short of tour. Not as bad as getting an agent killed, stealing official funds, or fabricating reports, but still a disaster. How it would affect future assignments, promotions, Nate couldn’t tell, but the news would get around the minute the cable from Gondorf hit Headquarters. Some of his classmates from training were already on their second tours, making their bones. Rumor had it that one of them already had been offered a chief’s job in a small Station. The additional months of training for Moscow had put Nate behind the curve, and now this.

Even as he told himself not to fixate, Nate fretted. He had always been told to keep up, of the necessity of not falling behind, of the absolute requirement to win. He grew up in the genteel southern equivalent of a cage match where generations of Nashes had been raised in the Palladian family mansion on the bluffs along the south shore of the James. Nate’s grandfather and his father after him, respectively founder and reigning partner of Nash, Waryng, and Royall in Richmond, had sat in green-shaded studies, and sucked their teeth, and shot their cuffs. They had nodded approval as Nate’s brothers, one implausible with Julius Caesar curls, the other sweating and outrageous in a gamine comb-over, wrestled in their suits on the carpet, and learned just enough of the law, and married chesty belles who stopped talking when the men came into the room, blue eyes searching for approval.

But what y’all suppose we do about young Nate? they had asked one another. Graduated from Johns Hopkins with a degree in Russian literature, Nate sought refuge in the spiritual, ascetic world of Gogol, Chekhov, Turgenev, a world that brick-paved Richmond could not invade. His brothers howled and his father thought it a waste. It was expected that he would attend a law school—he was preapproved for acceptance at Richmond—and eventually fill a junior partner’s chair at the firm. The graduate degree in Russian from faraway Middlebury was therefore a problem, and the subsequent application to the CIA a family crisis.

“I believe you’ll find the life of a civil servant less than fulfilling,” his father had said. “I frankly cannot see you happy in that bureaucracy.” Nate’s father had known past directors. His brothers were less circumspect in their criticism. During a particularly riotous holiday meal, they started a family pool to predict how long Nate would last in the CIA. The high field was three or fewer years.

His application to the Central Intelligence Agency had nothing to do with escaping the suspenders and cuff links, with the crushing absoluteness of Richmond, or with the inevitability of the colonnaded mansion overlooking the river. It had nothing to do with patriotism either, really, though Nate was as patriotic as the next person. It had everything to do with the hammer in his chest when he at ten years of age made himself walk along the ledge of the mansion three floors up, level with the hawks over the river, to beat down the dread, to confront the raptors of fear and failure. It was about the strain between him and his father and grandfather and omnivore brothers, raucously demanding compliance from him while practicing none themselves.

It was the same hammer in his chest during interviews as he applied to the CIA, the heartbeat he had to still as he dissembled and jauntily affirmed how much he liked talking to people and meeting challenges and confronting ambiguity. But as the heartbeat slowed and his voice steadied, he had the quite remarkable epiphany that he actually could be coolheaded, and he could confront things he didn’t control. Working in the CIA was something he needed.

But real alarm slammed through him when a CIA recruiter informed Nate that it was unlikely his application would be accepted, mainly because he had no postgraduate “life experience.” Another interviewer, more optimistic than the other, confidentially told him his excellent Russian test scores made him a very attractive candidate. It took the CIA three months to decide, during which time his brothers noisily revised the family pool predicting the date of his return from the CIA. They were no less noisy when the envelope arrived. He was in.

Report for duty, sign the endless forms, file into a dozen classrooms, the months in Headquarters, cubicles, and conference rooms with the uninterested briefers and the eternity of projected presentations. Then finally the Farm, with the macadam roads running straight through the sandy pine forests and the linoleum dorm rooms, and the stale homerooms and the classrooms carpeted in gray, and the numbered students’ seats which belonged previously to last year’s heroes, to heroes forty years ago, faceless recruits, great spies or not, some gone wrong, the traitors, some long dead and remembered only by those who knew them.

They planned clandestine meetings and attended mock diplomatic receptions, mingling with loud, red-faced instructors wearing Soviet Army uniforms and Mao suits. They walked wet-to-the-knee through the piney woods, peering through a night scope and counting paces until they came to the hollow stump and the burlap-wrapped brick, the owls in the branches congratulating them for finding the cache. They were laid over the hot ticking hoods of their vehicles at pretend roadblocks, as instructor “border guards” shook sheaves of papers in their faces and demanded explanations. They sat in swaybacked American Gothic farmhouses along lonely country roads and drank vodka and convinced gibbering role players to commit treason. Through the pines, the slate-black river was furrowed by the talons of dusk-feeding ospreys.

What instinct enabled Nate to excel in practical exercises? He didn’t know, but he left the drag of family and Richmond behind and ran effortlessly on the street, under surveillance, coolly meeting instructor-agents bundled in coats and wearing implausible hats. They said he had the eye. He started to believe it, but the jackdaw challenges of his brothers hung over his head like a blunt instrument. Nate’s nightmare was failing, getting kicked out, showing back up in Richmond. They dropped people from training without warning.

“We look for integrity from you students,” said a tradecraft instructor to the class. “We send people home for trying to G-2 the scenarios for upcoming problems. Just to max the exercises,” he said loudly. “You get caught with an instructor notebook, or any other restricted course material, it’s an immediate drop from the program, people.” Which, to be perfectly honest, thought Nate, meant, Try it.

They were a class, but of individuals, all dreaming of first assignments, first tours to Caracas, Delhi, Athens, or Tokyo. The ache for class standing and first choice of assignments was acute, and culminated in excruciating receptions in the student center hosted by various Headquarters divisions, a bizarre sorority rush week for fledgling spies.

At one of these end-of-training cocktail parties, a man and a woman from Russia House took him aside and told him he was preapproved and accepted in the Russia Division, so he didn’t have to request assignments elsewhere. Nate mildly asked if he couldn’t use his Russian language to chase Russians in, say, the Mideast or Africa Divisions, but they smiled at him and said they looked forward to seeing him in Headquarters at the end of the month.

He was through, and provisionally accepted. He was part of the elite.

Now came lectures about modern Russia. They discussed Moscow’s Dam-oclean politics of natural gas, hanging plumb over Europe, and the Kremlin’s chronic inclination to sponsor rogue states in the name of fairness, but really to make mischief and, well, to prove Russia was still in the Game. Furry men lectured about the promise of post-Soviet Russia, and elections and health reforms and demographic crises, and about the heartbreak of the curtain being drawn closed again, and behind it the icy blue eyes that missed nothing. The Rodina, sacred Motherland of black earth and endless sky, would have to endure a while longer, as the chain-wrapped corpse of the Soviet was exhumed, hauled dripping out of the swamp, and its heart was started again, and the old prisons were filled anew with men who did not see it their way.

And a flinty woman lectured about a new Cold War, about the sly disarmament negotiations and the new supersonic fighters that can fly sideways but still show Red Star roundels on the wings, and Moscow’s rage over a Western missile defense shield in Central Europe—oh, how they resented the loss of their elegant slave states!—and the sabers scraping in the rusty scabbards, familiar music from the days of Brezhnev and Chernenko. And the point of it all, they said, the point of Russia House, was the unceasing requirement to know the plans and intentions behind the blue-eyed stare and the smooth blond brow, different secrets nowadays, but the same as ever, secrets that needed stealing.

Then a retired ops officer—he looked like a Silk Road peddler, but with green eyes and a lopsided mouth—came to Russia House for an informal presentation.

“Energy, population decline, natural resources, client states. Forget all that. Russia is still the only country that can put an ICBM into Lafayette Square across from the White House. The only one, and they have thousands of nukes.” He paused and rubbed his nose, his voice deep and throaty.

“Russians. They hate foreigners only a little less than they hate themselves, and they’re born conspirators. Oh, they know very well they’re superior, but your Russki is insecure, wants to be respected, to be feared like the old Soviet Union. They need recognition, and they hate their second-tier status in the superpower stakes. That’s why Putin’s putting together USSR 2.0, and no one is going to stand in his way.

“The kid who pulls the tablecloth and smashes the crockery to get attention—that’s Moscow. They don’t want to be ignored and they’ll break the dishes to make sure it doesn’t happen. Sell chemical weapons to Syria, give fuel rods to Iran, teach Indonesia centrifuge design, build a light water reactor in Burma, oh, yeah, people, nothing’s out of bounds.

“But the real danger is the instability all this creates, the juice it gives the next generation of world-stopping crazies. People, the second Cold War is all about the resurgent Russian Empire, and don’t kid yourselves Moscow is gonna sit back and see how the Chinese navy handles itself when—not if—the shooting starts in the Taiwan Strait.” He shrugged on a shiny suit coat.

“It’s not as easy this time around; you men and women will have to figure it out. I envy you.” He lifted his hand. “Good hunting,” he said, and walked out. The room was quiet and they all stayed in their seats.

Nate was now in the vaunted Moscow pipeline, dipped in specialized training, compartmented internal ops training, and as the Moscow tour loomed, he studied operational vocabulary in Russian, and he was allowed to review the “books,” the agent files, read the names and examine the flat-faced passport photos of the Russian sources he would meet on the street, under the nose of surveillance. Life and death in the snow, the tip of the spear, as big as it comes. His Farm class was dispersed and largely forgotten. Now there were other lives at stake. He could not—would not—fail.


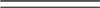


Three days after his talk with Gondorf, Nate was sitting in a small restaurant in Moscow’s Sheremetyevo Airport, waiting for his flight to be called. He ordered a “sanwitz Cubano” and a beer off the greasy menu.

The Embassy had offered to send an admin facilitator with him to help with tickets and passport control, but he had politely refused. The night before, Leavitt had brought out some beers at the end of the workday, and they sat around talking quietly, avoiding the obvious subjects, certainly not mentioning what all the other officers thought, that Nate’s career in general and reputation in particular were going to take a hit. Good-byes were strained.

The only bright spot was that two days before, in response to Gondorf’s short-of-tour notification, Headquarters cabled that a case-officer position in neighboring Helsinki had suddenly come open. Given Nate’s nearly fluent Russian, the abundance of Russians in Finland, his instant mobility as an unmarried officer, and his unexpected availability, Headquarters inquired whether Nate would consider a lateral assignment to Helsinki, effective immediately. Nate accepted, as Gondork bridled at the reprieve, but concurred. Helsinki Station’s formal assignment cable arrived, followed by an informal note from Tom Forsyth, his soon-to-be new Chief of Station in Helsinki, simply saying he was glad to welcome Nate to the Station.

Nate’s Finnair flight was called and he walked out onto the tarmac with the other passengers toward the plane. High above him, from a glassed-in observation room in the control tower of the airport, a two-man team cranked frames with a long lens. FSB surveillance had followed Nate to the airport to say good-bye. The FSB, the SVR, and especially Vanya Egorov were certain that Nate’s sudden departure was significant. As Nate mounted the aircraft stairs and the cameras clicked, Egorov sat in his office immersed in thought. A shame. His best chance to find the spy the CIA was running was fading away. It would take months, perhaps years, to develop a better lead in this case, if at all.

Nash was still the key, thought Egorov. He presumably would still handle his source from outside Russia. Egorov decided not to let up on Nash, and the lateral assignment to Finland was an opening. Let’s work him a little in Helsinki, he thought. The SVR could operate virtually at will in Finland, and better yet, they had primacy in the foreign field. No more FSB bum-boys to coordinate with. We’ll see, thought Vanya. The world was too small a place to hide.

MOSCOW AIRPORT CUBAN SANDWICH

Slice a twelve-inch loaf of Cuban bread partway through lengthwise and fold flat. Drizzle olive oil on outside and slather yellow mustard inside. Layer glazed ham, roast pork, Swiss cheese, and thinly sliced pickles. Close and press for ten minutes in a plancha or between two hot foil-wrapped bricks (heat bricks for an hour in a 500-degree oven). Cut in thirds on the diagonal.

3

Dominika Egorova was sitting at a private corner banquette in the crystal-and-marble opulence of Baccara, the most elegant of the new restaurants in Moscow, located a few steps from Lubyanka Square. The forest of crystal and silver on a dazzling white tablecloth was unlike anything she had experienced before. She was enjoying herself and, despite the operational nature of the evening, was determined to enjoy the sinfully expensive dinner.

Dimitri Ustinov sat across from her, humming with horny. Tall, heavily built, with a shock of black hair and a lantern jaw, Ustinov was a leading member of the fraternity of gangster Russian oil and mining oligarchs who had amassed billion-dollar empires in the boom years after the Cold War. He had started as a local enforcer in organized crime, but he had come up in the world.

Ustinov was dressed in a flawless shawl-collar tuxedo over a ribbed white dress shirt with blue diamond studs and cuff links. He wore a Tourbillon watch by Corum, one of only ten produced each year. His bear-paw hands rested easily over a blue-enameled Fabergé cigarette case, made in 1908 for the czar. He took a cigarette out of the case and lit it with a solid-gold Ligne Deux, snapping it shut with the distinctive musical note of all Dupont lighters.

Ustinov was the third-wealthiest man in Russia, but for all his wealth he was not the smartest. He had feuded publicly with the government, most notably with Prime Minister Vladimir Putin, and had refused to acknowledge or accept government regulation of his enterprises. Three months ago, at the height of the feud, Ustinov airily made obscenely disparaging remarks about Putin on a Moscow TV interview show. People in the know were amazed that Ustinov was still alive.

Ustinov wasn’t thinking about anything that evening except Dominika. He had seen her at the television station a month after his interview. Her beauty and elemental sexuality took his breath away. He had been prepared to buy the television station on the spot just to meet her again, but it wasn’t necessary. She immediately and delightedly had accepted his invitation for dinner. As he looked at her across the table, Ustinov wanted his thumbprints all over her.

Dominika was twenty-five years old, with dark chestnut hair worn up and tied with a black ribbon. Her cobalt-blue eyes matched his cigarette case and he said so, then compulsively slid the priceless bauble across the table to her. “This is for you.” She had full lips and slim, elegant arms that tonight were bare. She wore a simple black dress with a plunging neckline that revealed a spectacular cleavage. The diffused candlelight barely illuminated one fine blue vein on her breast beneath flawless skin. She reached out and fingered the magnificent case with long, elegant hands. Her nails were short and square-cut, without any polish. She looked at him with wide eyes and he felt a string being plucked somewhere between his gut and groin.

She knew enough to follow her instincts, to swallow the bile in her throat. She smiled at this elemental lizard. “Dimitri, this is magnificent, I cannot possibly accept such a gift,” she said. “It’s too generous.”

“Of course you can,” Ustinov said, struggling to be charming. “You are the most beautiful woman I have ever met, and you being here is the most wonderful gift I could ever receive.” He took a sip of champagne and imagined that little black dress in a discarded heap in the corner of his bedroom. “I am very fond of you already,” said Ustinov.

Dominika willed herself not to laugh at him, even as she felt a delicious iciness run up her back and down her arms. This derevenshchina, this rube, had as much sophistication as a provincial bully-boy enforcer, which was exactly what he had been years before. But Lord, he was wealthy now. During the week of preparation, Dominika had been told a few facts about Ustinov: Yachts. Villas. Penthouse apartments. Oil and mineral holdings around the world. A private security army made up of well-paid mercenaries. Three private jets.


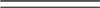


Dominika was the only child of Nina and Vassily Egorov. Nina had been concertmaster in the Moscow State Symphony, a rising virtuoso who had studied with Klimov and had such massive potential that she was allocated Guarneri’s magnificent 1741 Kochanski del Gesù by the Glinka State Central Museum of Music and Culture. Fifteen years ago her anticipated promotion to the Russian National Symphony Orchestra was denied her when Prokhor Belenko, a toad-eating violinist of inferior talent—but married to the daughter of a Politburo member—demanded that he be promoted, and was given the position. Everyone knew what had happened, but no one said a thing.

Along with her brilliance in playing the red-varnished skripka, Nina Egorova was known for her fiery disposition, including a simmering temper that exploded whenever she had seen enough. Before the amused eyes of eighty fellow orchestra members, Nina had walloped Belenko above the right ear with his own music stand during his last rehearsal with the State Symphony. Nina was unrepentant. She was also a woman in the then–Soviet Union. They took away the Guarneri. She refused to play a lesser instrument. They moved her from the first to the third seat in strings. She sent them to hell. Administrative leave morphed into dismissal when the Ministry of Culture called the symphony director and her career was over. Now, years later, the elegant neck had bent, the strong hands had curled, the dark hair was gray and in a bun.

Dominika’s father was the famous academician Professor Vassily Egorov, Senior Professor of History at Moscow University. He was one of the most respected and influential figures in Russian letters, with the rank of Meritorious Professor. His gold-and-blue Order of St. Andrew hung framed on the wall; the claret bowknot he wore every day on his lapel was the Medal Pushkina, the Pushkin Medal for achievement in literature and education. Ironically, Vasya Egorov didn’t look distinguished or influential. He was short and slight, with thinning hair combed carefully across his head.

Unlike his wife, Vassily Egorov had survived the Soviet years by avoiding politics, allegiances, and controversy. Cocooned in the university, he succeeded chiefly by carefully cultivating a persona of studious fair-mindedness, discretion, and loyalty. What no one knew was that Meritorious Comrade Professor Vassily Egorov maintained a secret, separate soul, the conscience of a totally different being, in which he harbored a moral thinker’s revulsion for the Soviet. Like all Russians, he had lost family in the 1930s and 1940s to Stalin, resisting the Germans, the purges, the katorga. But more than that. He rejected the imbalance and illogic of the Soviet system, he despised the top-heavy favoritism of the cheloveki, the insiders’ sloth and self-indulgence that crushed the human spirit and had robbed Russians of their lives, their country, their patrimony. It was an apostasy shared only with Nina.

All Russians harbor secret thoughts, they are accustomed to it. So it was with Vassily and Nina, who hid their revulsion at how modern Russia had not changed. Even as Dominika grew older and could begin to understand, Vassily dared not speak to her of their feelings. Both parents yearned to give her a clear vision of the world, to let her see the truth for herself. If they could not expose Russia’s hellish evolution—from Bolshevik rage to Soviet rot and now, even after glasnost, into the Federation’s parasitic greed—Vassily at least resolved to instill in Dominika the real majesty of Russia.

The spacious three-room apartment (after Nina’s dismissal they were permitted to keep it, thanks only to the continued position and prestige of Vassily) was filled with books, music, art, and conversation in three different languages. Her parents noticed, when Dominika turned five, that the little girl had a prodigious memory. She could recite lines from Pushkin, identify the concertos of Tchaikovsky. And when music was played, Dominika would dance barefoot around the Oriental carpet in the living room, perfectly in time with the notes, twirling and jumping, perfectly in balance, her eyes gleaming, her hands flashing. Vassily and Nina looked at each other, and her mother asked Dominika how she had learned all this. “I follow the colors,” said the little girl.

“What do you mean, ‘the colors’?” asked her mother. Dominika gravely explained that when the music played, or when her father read aloud to her, colors would fill the room. Different colors, some bright, some dark, sometimes they “jumped in the air” and all Dominika had to do was follow them. It was how she could remember so much. When she danced, she leapt over bars of bright blue, followed shimmering spots of red on the floor. The parents looked at each other again.

“I like red and blue and purple,” said Dominika. “When Batushka reads, or when Mamulya plays, they are beautiful.”

“And when Mama is cross with you?” asked Vassily.

“Yellow, I don’t like the yellow,” said the little girl, turning the pages of a book. “And the black cloud. I do not like that.”

Vassily asked a colleague from the Faculty of Psychology about the colors. “I have read about a similar condition,” said the colleague. “Sensing letters as colors. It’s quite interesting. Why don’t you bring her by one afternoon?”

Vassily waited in his office while his professor friend sat with Dominika in a nearby classroom. One hour stretched to three. They came back, little Dominika happy and distracted, the professor pensive. “What?” asked Vassily, looking sideways at his daughter.

“I could sit with her for days,” said the professor, packing his pipe. “Your little girl shows the attributes of a synesthete. Someone who perceives sounds, or letters, or numbers as colors. Fascinating.” Vassily looked at Dominika again. She was now happily coloring at her father’s desk.

“My God,” said Vassily. “Is it an illness, is it insanity?”

“Illness, burden, curse, who can say?” He stuffed his pipe. “On the other hand, Vasya, perhaps she is odarennyi, gifted.” Vassily, the brilliant man of letters, was at a loss. “There’s something else,” said the professor, looking over at Dominika, her head bent over her drawing. “Her synesthesia appears to extend to human reactions. Not only words or sounds, she also sees emotional content as colors. She spoke to me about what sounds like halos of color around people’s heads and shoulders.” Vassily stared at his friend. “Perhaps she will develop into something of a savant in matters of human intentions.

“Of course, there is the prodigious memory. She flawlessly repeated twenty-five digits back to me several times. It is not uncommon in these cases,” continued the professor. “But you already have seen that.” Vassily nodded. “And another thing, not so common. Your little girl is prone to buistvo, define it as you like, temper, mischief, a short fuse. She swept my papers to the floor when she could not solve a puzzle. Something she will have to control later in life, I would imagine.”

“Bozhe,” said Vassily, and hurried home to tell his wife.

“This comes from your family,” said Vassily dryly to Nina, as red-faced Dominika would glower when the music was turned off, gravely displeased, eyes ablaze. If she was this way at age five, what would she be like later on?

When at the age of ten Dominika auditioned at the Moscow State Academy of Choreography at second Frunzenskaya 5 she impressed the admissions panel. She had no technique, no formal discipline, but even at that young age they saw in her the intensity, the natural skill, the instincts of a great dancer. They had asked her why she wanted to dance, and had laughed at her answer, “Because I can see the music,” and the room grew still as her already strikingly beautiful face darkened and she regarded the panel through narrowed eyes as if contemplating doing them all physical harm.

Dominika made her saucy, triumphant way through the academy, the great feeder school for the Bolshoi. She flourished despite the rigors of the classical Vaganova method. She had by then become accustomed to living with the colors. Her ability to see them, whether while listening to music, or dancing, or simply talking to people, now felt more refined, somehow more under her control. And she began deciphering the colors, associating them with moods and emotions. It was not a burden. To her it was simply something she lived with.

Dominika continued to excel, but not only in dancing. She achieved highest marks in the academy’s middle and upper schools, where her ability to remember everything she had been taught served her well. This was something new, something different. Dominika listened to the political lectures, the ideological lessons, the history of communism, the rise and fall of the socialist state, the history of Soviet ballet. Of course, there had been excesses, and there had been corrections. And now modern Russia would continue to grow, a sum greater than its parts. Her young mind made the leap, accepted the cant.

By age eighteen, Dominika was promoted to the first student troupe at school and led her study class in political achievement. Each night she would return home to tell her secretly horrified father what she had learned. He tried to counterbalance her growing enthusiasms with the lessons of literature and history. But Dominika was in the full flight of her adolescence, in the grip of her young career. If she sensed the nature of his desperate message, if she read the colors above his head, she gave no sign. Vassily could not be more clear. He dared not speak out openly against the system.

Of course, Nina was pleased that her daughter was progressing so rapidly in the junior ballet company. It was fine, a secure future was assured. But she too watched in dismay as her little girl became a model Modern Russian Woman, an ultranationalist, a tall, chestnut-haired beauty who walked with the elegance of a ballerina, and who behaved like the apparatchiki of the old days.

Dominika lay on the carpet in the living room, her mother combing her dark hair softly, rhythmically, with the long-handled brush that belonged to her great-grandmother. The tortoiseshell brush with gently curved handle that, along with a framed photograph and a silver samovar, was the only family belonging rescued from the elegant house in pre-Bolshevik Petersburg. The hog’s-hair bristles made a quiet stirring sound, crimson in the air. Her hair was radiant. Dominika, stretching after a long day of ballet, interrupted her father’s soft-spoken narrative by relating what she had heard at school. “Father, do you realize that outside influences are threatening the country? Are you aware of the growing number of dissidents advocating chaos? Have you read V. V. Putin’s article concerning Zionists working against the state?”

With a dull ache, the parents looked down at their daughter. Gospodi pomiluj! God forbid! The state. V. V. Putin. Dissidents. On the floor, Dominika stretched deeply, her long legs and lithe figure already Their instrument, her good mind slowly being brought into Their service. Nina looked at Vassily. She wanted to tell her daughter the truth, to warn her about the pitfalls of the system that had killed her career, of a system that had forced Vassily to blank his exceptional mind and stay silent for his entire life. Vassily shook his head. “Not now, not ever,” he said.

At twenty, Dominika was selected prima ballerina of the First Troupe. Her evaluations uniformly were outstanding and her athletic ability prompted her ballet master to compare her to “a young Galina Ulanova” the prima ballerina assoluta of the Bolshoi after the war. Now, when she danced, the colors she saw no longer were elemental shapes and hues, but sophisticated waves of variegated lights, rolling and pulsing and carrying her aloft. The sepia tones surrounding her dancing partners let her more perfectly combine with them. She was hot to the touch, precise, strong in back and leg, exquisite and tall on her toes. The ballet master insisted it was time she began preparing for the yearly audition to join the Bolshoi troupe.

As she grew stronger and more supple, there was something else coming alive within Dominika’s body, an extension of the rigors of dance, an awareness of her own body. It was not lasciviousness, for she carried her sexuality within her. It was a private awakening, and she tested her corporeal boundaries without a thought of shame. As far as she could determine, neither of her parents was this way, so perhaps a long-forgotten relative had been a libertine.

In her darkened bedroom, when her body called her, she explored her sensations, explored them as intently as she practiced at the barre, her breathing deep red behind her eyelids, and she shuddered as she discovered how she was wired. It was not a fetish, nor an addiction, but rather a secret self that grew more aware as she grew older. She enjoyed her secret self. It was not all nature-child innocence, however. She occasionally felt the need for something edgy, forbidden, and she closed her eyes tight, on a night of a colossal thunderstorm outside her window, amazed at herself, as she held the swan-necked handle of Prababushka’s brush in her long fingers, timing the lightning flashes to match her own rhythms. Wanting more and more, amazed still, she trailed the humid point lower and held her breath and felt the even sweeter surge of the handle suddenly pinning her like a beetle in a display case. Thank God she had now taken to combing her own hair in the evenings after ballet school.

Though she had casual friends, Dominika was not friendly with her classmates. For all that, she was class leader, concerned and consumed with nothing but the troupe’s progress, its record of excellence, the triumphs in competitions with other schools, especially those from Saint Petersburg, the spiritual center of Russian ballet of the imperial style. Dominika lectured her weary fellow dancers about the Moscow School’s purity, its essential Russian nature. They all called her klikusha, the demoniac, behind her back, the New Russian Woman, the gladiator, the star, the devoted, the true believer. Oh, shut up, they thought.

At twenty-two, Sonya Moroyeva probably had one final year to move up from the academy to the Bolshoi, but with Egorova in the running that year, her chances were not good. She had been dancing all her life, was the daughter of a full member of the Duma, and was at the core a spoiled and vain young woman. She was, frankly, desperate. She had been recklessly sleeping with a boy in the troupe, blond, lynx-eyed Konstantin, an incredibly risky activity that if discovered by the instructors would have guaranteed their instant dismissal from the school. But after fifteen years in the academy she knew the quiet times, and when the sauna room was deserted, and how long they had for their sweaty sessions, with her supple legs bent over her head, and she whispered in Konstantin’s ear for a week, and told him she loved him, and ground her hips up at him, licking the sweat from his face, and begged him to save her career, her life.

Experienced ballet students know as much about anatomy and joints and injuries as a doctor. Konstantin, rabbit-mad in his gluttony for Sonya’s pizda, waited until he was paired with Dominika. Practicing a pas de deux on a crowded floor, he stepped hard on her heel when she was en pointe, forcing her foot forward, and the colors bled and her world went swirling black, and she buckled to searing pain and total collapse. They carried her to the infirmary, her classmates frozen and pale along the barre, Sonya palest of all. Dominika had looked at her then, had seen her guilty expression, the gray miasma swirling unseen around her head, and knew. On the infirmary table her foot was turning black and eggplant-purple, the worst, and the pain radiated up her leg. The doctor muttered, “Lisfranc fracture of the midfoot,” and after a series of orthopedic examinations and surgery, and a cast on her foot to the ankle, Dominika was dropped from the academy; her dancing career, her life for ten years, was over. It was that fast, that final. All the honeyed phrases about her being the next Ulanova evaporated. The masters, the coaches, the trainers wouldn’t look at her.

In young adulthood she had learned to cope with the buistvo, the mounting rage, but now she let it grow, tasted it in her throat. She hysterically considered denouncing Konstantin and Sonya for having sabotaged her. They too would be expelled if their assignation was revealed, but in the end she knew she could not. She was still numbly contemplating her future when the call came from her mother.


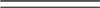


Her father had suffered a massive stroke and had died on the way to Kremlyovka Clinic in Kuntsevo, reserved for citizens of privilege and wealth. He had been the most important person in her life, her guide, her protector, and now he was gone. She would have held his hand to her cheek, told him of her release from the ballet academy, of the treachery of her classmates. She would have asked him for advice, for him to tell her what she should do. She could not know it, but Vassily would have whispered to his idealistic daughter that one may fall in love with the State, but the State does not reciprocate, ever.

Two days later, Dominika sat in the formal parlor of their apartment, her right foot extended in the cast, her eyes dry, her elegant neck and head held high. Her mother sat beside her, in black, quiet and calm. The house was full of guests, scores of people who came to pay their respects, academics, artists, government officials, and politicians. The sound of their voices filled the air with elemental shades of green, the color she associated with sorrow and grief, and which seemed to push the air out of the room. Dominika struggled to breathe. There was food from the kitchen, traditional blini with red caviar, smoked sturgeon and trout. On the sideboard, carafes of mineral water, a steaming silver samovar, fruit juice, whiskey, and iced vodka.

Then, looming in front of the couch was Uncle Vanya, leaning over her mother, mouthing words of condolence. The brothers had never been close, their personalities and temperaments nearly polar opposites. Dominika was not sure what he did, but one hardly uttered the letters KGB or SVR. Then he came close, sitting beside her, his beefy features inches from her face, intruding on her grief. She saw him appraise her, dressed in black, hair back, in mourning. Her throat constricted in the familiar way, and her mother reached over to squeeze her hand. Control yourself.

“Dominika, my deepest condolences,” said Vanya. “I know how close you were to your father.”

He reached out and gave her a paternal embrace, brushing his cheek against hers. His cologne (Houbigant from Paris) was lavender-scented and strong. “Let me also say that I regret your injury, how it affects your career.” He nodded at her cast. “I know what a good student you had become, both with the dancing and in school as well. Your father was always very proud of you.” He sat back in the couch as another family friend passed by, shaking hands.

Up till now, Dominika had only looked at Vanya, she had not spoken. “What are your plans now?” he asked. “Perhaps the university?”

Dominika shrugged. “I am not sure what comes next. Dancing was my life, I have to find something else.” She felt him staring at her.

He smoothed his tie and stood, looking down at her. “Dominushka, I have a favor to ask. I need your assistance.” Dominika looked up at him, startled. Uncle Vanya shrugged. “It’s not so mysterious. I need you to do something for me, quite unofficial, a small little thing, but important.”

“For the Secret Service?” Dominika asked, astonished.

Vanya put a finger to his lips. He led her limping to the side of the living room. The day of her father’s funeral. He had chosen this time purposely, hadn’t he? They always did.

“I need your talent, dorogaya moya, my dear, and your beauty,” Uncle Vanya had said. “Someone I can trust, someone with your well-known discretion.” He moved closer, and Dominika felt the flattery wrapped in his body heat.

“It is a simple task, almost a game, to meet a man, to get to know him. I can provide the details later.” Zmeya, serpent.

“Will you agree to help your old uncle?” Vanya asked, his hands on her shoulders. A serpent, flicking its tongue, tasting the air. For him to ask her now was monstrous, typical, beastly. Dominika could feel her heartbeat in her throbbing foot.

A halo of yellow bloomed behind Vanya’s head as if he were a Byzantine saint. Then her breath came back, and with it a hollow calm. Precisely because he expected her to refuse, Dominika accepted. She looked back evenly, seeing the narrowing of his eyes, seeing him calculate. She saw him searching her face, but she gave him nothing, and his face had reacted to that.

“Excellent,” said Vanya. “You know that your father would be extremely proud. There was no bigger patriot than your father. And he raised his daughter to be a patriot too. A Russian patriot.”

Continue speaking of my father and I shall lean forward and bite your lower lip off, she thought. Instead, Dominika gave him a smile that only recently she had come to recognize had an effect on people. “Now that my ballet career is over,” she said, “I may as well do secret chores for you.” Vanya’s face moved, then he recovered. He took his hands from her shoulders.

“Come to see me next week,” he said, looking down at her cast. “If you are able. I will send a car for you.” Vanya buttoned his light woolen suit. He took her hand in his big paw, his face inches from hers. “Come give your uncle a proper good-bye.” Dominika put her hands on his shoulders and pecked him lightly on either cheek, looking for a moment at his wet liver lips. Lavender scent and a yellow halo.

He whispered in her ear. “I do not ask you to help me for nothing in return,” he said. “I believe I can intervene in the matter of this apartment.” Dominika pulled back. “Your mother would not lose it, even after your father’s death. It would be a great comfort to her.” Vanya let go of her hand, straightened, and walked out of the room. Astonished, she watched him close the door behind him. A first taste of the yoke, thought Dominika.

On the street, Vanya motioned his driver to get going and settled into the backseat of his Mercedes. There, he thought with a sigh, I’ve paid my respects. Brother Vassily was a fuzzy-headed academic, living in the past. And that sister-in-law. She’s already lost her mind, a sumashedshij, a lunatic. But that niece—she’s a real Greek statue—is perfect for this matter, I’m glad I thought of her. Now that she’s ruined her foot she has no options. She can learn other things. That apartment would sell for millions, Vanya thought. Yes, after all, this is family and it’s the least I can do.


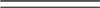


That evening after the guests had left she sat with her mother in the darkened living room. Bach was playing softly, accompanied by the nearly empty samovar that sighed occasionally with the last of its steam. Dominika didn’t need lights in the room. Great waves of deep red pulsed past her from the music. Holding both her hands in her lap, Nina looked at her daughter and knew she was “looking at the colors.” She squeezed Dominika’s hands to get her to concentrate, and began talking in a low, slow voice. She whispered to her, leaning close to her daughter, and spoke about her father and his life. She spoke about ballet school and Russia and what had happened to her. And then Nina spoke of darker things, of promise and betrayal and revenge. Two figures in a darkened room filled with vermilion Bach, two klikushy in a forest glen, planning mayhem.

Two days later, Dominika returned to the academy, ostensibly to talk with the doctors and to collect her belongings. She was already an outsider, it was as if they were waiting for her to leave. She lingered unobtrusively, sitting in a chair near the exit, watching Sonya Moroyeva and Konstantin dancing, Sonya’s right leg impossibly high, impossibly straight en penché, Konstantin turning her in a slow promenade. His eyes were on the slash of black leotard stretched across her crotch. At the evening break, with shadows lengthening in the nearly empty practice hall, Dominika watched Sonya and Konstantin slip down the hall toward the sauna room. There had been rumors about the two, of course, but now Dominika knew. She waited and watched the light on the practice hall’s parquet floor fade, feeling the familiar tightening, controlling it, bringing the ice.

The building had grown silent, the various offices dark. The ballet master and two matrons were still in their offices farther down; dim lights shone at the far end of the otherwise darkened hallway. Dominika hobbled silently to the door of the anteroom of the large wood-paneled sauna used by students and pushed through it, silently walked to the door of the steam chamber and peered through the smoked-glass port in the cedar door. They were both naked on the wooden slats of the top bench, barely illuminated by the single bulb in the ceiling. Konstantin had just raised his face from between Sonya’s wide-spread legs and was poised over her like a great beast. Sonya clasped her hands behind Konstantin’s neck and swung her legs over his shoulders. Through the glass, Dominika saw the calluses on the pads of Sonya’s feet and the splay of battered ballerina toes.

Her mouth was open and her head was back on the bench, but the heavy door of the sauna muffled Sonya’s moans. Dominika stepped back and willed the ice to take over the rage. A twist of the steam dial and a broomstick through the outer door handles would poach them both in twenty minutes. No. Something elegant, undetectable, poisonous, final. The two had ended Dominika’s career, now it was time to end theirs, but without a trace, without a hint of revenge.

Dominika propped open the hallway door to the anteroom and turned on the overhead light, which shone into the darkened corridor. In the long hallway she swung one of the exterior windows open. The cool night air rushed in and Dominika followed the cold air, pinpricks of ice-blue light like fireflies swirling down the hallway toward the matrons’ offices. She slipped into a darkened office two doors down and leaned against the wall and listened.

In three minutes the matron—which one was it? Dominika wondered—felt the cold air and went down the hallway to investigate. The light in the sauna anteroom and the open door opposite the window had her muttering to herself. It sounded like Madame Butyrskaya, the most strict, the most ferocious of the academy watchdogs. Dominika waited in the silence, counting the seconds, then heard the hiss of the sauna door and then Madame’s bellows and what sounded like a strangled sob. Sounds of feet on the linoleum and continued bellowing and now mewling, whimpering, receded down the hallway. Not even her daddy in the Duma could save her, she thought.

Dominika put her hand up in front of her face in the nearly dark office. It was steady and luminous and she felt air coursing back into her lungs, as if someone had opened the valve to an oxygen bottle, and she realized, with a little huff of surprise, that she felt no emotion over having destroyed those two, and she reveled in the elegance and simplicity of what she had done, and then thought about her father and was a little ashamed.


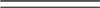


The cast came off her foot. SVR planners intended to dangle Dominika in front of Ustinov at the television station. They wanted him to invite her to spend time with him. They didn’t tell her to sleep with him, it wasn’t necessary, they had said, but she knew it was implied. Their deceit lay on the table. She surprised herself by not caring about that. The briefers looked at her cautiously, unsettled by her level gaze and slight smile, not sure what they had on their hands.

All right, all right, they said, they needed to know more about his business, his international travel schedule, his contacts. They said he was being investigated for fraud and misappropriation of State funds. The colors of their words were pale, washed out, as if they were not fully formed. Yes, what they needed was clear, she said, she could do it. The men in the room looked at one another and back to her, and she read them like a hymnal. This was an exceedingly interesting discovery, this SVR, this Russian Secret Service, she thought. Gusi, a gaggle of geese.

As she read the reports, themselves a riot of color, she resolved to silence the smug counterintelligence planners who sat looking at her through smoke-filled eyes, to wipe the smile off the face of her dear Uncle Vanya. She remembered the lavender smell of him. His poor little niece, the broken ballerina, his dead brother’s beautiful daughter. Care to help me in a delicate matter? Perhaps we can keep your mother in the apartment after all. Ochen horosho. Very good.


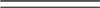


Now the candlelight flickered and the crystal clinked, and as Ustinov shoveled food into his mouth, Dominika felt an even, slow contempt for him that infused her with an icy detachment. She was prepared to do whatever was necessary to complete the assignment, and she knew precisely what to do and how to do it.

So she did. Dominika was captivating at dinner. Educated, attentive, distracting. She trailed a fingertip across the hollow of her throat, watching the parabolas of orange around his shoulders. Interesting, thought Dominika, the yellow of deceit mixed with the red of passion. Zhivotnoe. Animal.

He could barely sit still through dinner—she saw him gulping his champagne with the thirst that comes from building lust. His shirt studs vibrated. At the end of dinner, he told her he had a bottle of three-hundred-year-old cognac in his apartment, better than anything the restaurant could offer. Would she come home with him? Dominika looked at him and conspiratorially leaned forward. Her breasts swelled together in the candlelight. “I’ve never tried cognac,” she said. Ustinov could feel his heartbeat in his mouth.

BLINIS SERVED AT VASSILY EGOROV’S WAKE

Season one cup flour with baking powder and kosher salt. Add milk, egg, and clarified butter, and blend into a smooth batter. Cook a tablespoon of the batter at a time over medium low heat until blini are golden on both sides. Serve topped with red caviar, salmon, crème fraîche, sour cream, and fresh dill.

4

They left the restaurant in Ustinov’s sleek BMW, the windows of which were heavily armored. Ustinov’s apartment sprawled on the top floor of a massive neoclassical building in the “Golden Mile” section of the Arbat. It was a superb penthouse made up of two contiguous apartments with marble floors, massive white leather furniture, and gilt fixtures on the walls. City rooftops and the lights of Moscow were visible through the floor-to-ceiling windows that ran the length of the apartment.

The air was scented with incense. Enormous Chinese lamps cast warm light in pools throughout the room, and in one corner hung an abstract reclining nude, fingers and eyes and toes pointing in all directions, a Picasso, Dominika guessed. That will be me in fifteen minutes, she thought wryly.

Ustinov dismissed his security detail with a wave, and the door clicked closed. On an ebony sideboard, among a forest of bottles, Dominika saw a squat bottle of cognac, presumably the three-hundred-year stuff. Ustinov poured into seventeenth-century Bohemian crystal and made her sip. From another tray, she sampled an earthy pâté with a sublime hint of lemon on a delicate toast point.

Ustinov took Dominika’s hand and led her down a broad hall hung with lighted paintings and up three wide steps to the darkened bedroom. He did not notice the hint of a limp from her mended foot, more a hitch in her stride than anything. He was too busy looking at her hair, her neck, the softness of her bosom.

Their motion into the room triggered recessed lighting and Dominika stared in amazement from the doorway. The bedroom was a cavernous space, the size of a throne room, decorated in white and black contrasts. An enormous circular bed on a platform in the middle of the room was covered with plush fur throws. The walls were lined with scores of full-length mirrors. Ustinov picked up a remote and pressed a button. Fabric shades on the ceiling mechanically drew back to reveal a star-filled black sky through a cantilevered glass roof. “I can follow the moon and stars as they move across the sky,” he said. “Will you watch the sunrise with me tomorrow?”

Dominika forced herself to smile. The svin’ya in his sty. But how could such a man amass such wealth while others still stood in lines for bread? The atmosphere in the bedroom was heavy, with a fragrance of sandalwood. The ivory carpet beneath her feet was soft and thick. A collection of silver dishes on a white ash sideboard winked in the revolving lights. A separate spot illuminated a framed Ebru panel with spidery calligraphy. Ustinov saw her look at it. “Sixteenth century,” he said, as if he were prepared to take it off the wall and give it to her.

Now that they were standing in his bedroom, the game was a little more serious, the sexuality she had thrown around during dinner suddenly not so clever. The physical act was easy enough, she was not a prude. But she wondered what she would lose if she seduced this man. Nothing, she told herself. Ustinov couldn’t take anything away from her, neither could the leering briefers from the Service, nor lavender-scented Uncle Vanya with his mouthed condolences. “Serious work for the Service,” Vanya had said. Nonsense, Dominika thought. It was a political game to unseat a rival, but anyway this blyad, this gilded bastard, deserved to lose what he had, to go to prison. She would gut him, and Uncle Vanya would wonder what sort of person he had recruited for this task.

Dominika turned to Ustinov and let her wrap fall from her shoulders. She kissed him once lightly on the mouth and ran her hand across his cheek. He pulled her close and kissed her back roughly. Their two figures were reflected in a hundred mirror images.

Ustinov pulled away and looked at Dominika through tunnel-visioned eyes. His body was an exposed nerve; his brain was detaching itself from the anchor points inside his skull. He shrugged his dinner jacket to the floor and pawed at his silk bow tie. The oligarch who had made a fortune by outplaying other dangerous men, by cheating and hammering and, even, by eliminating his competition, saw only the blue eyes, the tendril of brown hair falling to the slender white throat, the lips still wet from their kiss. Dominika put her hands on his chest and whispered, “Dushka, wait for me on the bed. I will be two minutes.”

In the gilt-bedecked bathroom, Dominika looked at herself in the mirror. You said yes, she thought, first to Vanya and now to this medved, this drooling bear, so important to prove yourself, now get on with it. She reached behind her, unzipped, and stepped out of her dress. You use this, she thought, looking at her body in the mirror, and you get the thing done, captivate him, find out what they want to know. They had told her Ustinov was dangerous, he was a brute who had killed men. Fine. Tomorrow morning she would be spooning iced consommé into his upturned mouth like a baby bird, and he would be chirping his secrets to her, and then the brute would be looking at the world through bars. Then she remembered something from the briefing and quickly reached into her clutch and popped a Benzedrine tablet they had given her, for the physical lift, they had told her.

Ustinov was lying on the bed on his back, propped up on his elbows, naked except for a pair of black silk shorts. Dominika walked slowly up to the foot of the bed, wondering how to start. She remembered how good it felt when trainers had rubbed their inflamed feet at the ballet academy, so she knelt and rubbed her thumbs hard across the arch of his foot. Ustinov looked at her blankly. Idiotka, she thought, some courtesan you are, and with desperate intuition put her mouth over the big toe of Ustinov’s right foot and swirled her tongue around the length of it. He groaned and fell back on the bed. Better. His trembling hand reached into a recess on the frame of the bed and instantly the room was bathed in deep red light, coloring the bed, their faces, their skin. It was augmented by smaller dots of pink, swirling around the room, off the mirrors and over Dominika’s crimson body. With a low hum, the bed began revolving. God preserve us from gangsters, thought Dominika.

Ustinov grunted something at her and reached out his hand. The revolving pink lights against the all-red background of the room turned into double pink dots, then triple dots, revolving around one another in their respective paths across the room. Dominika was overloading on the lights and the colors, and Ustinov continued beckoning for her. His guttural obscenities came out as slashes of dark orange, elemental, brutal; they somehow slid beneath, not over, the pink dots.

Dominika looked at him from under half-closed lids and wondered whether she should lick her lips for effect. As he revolved like a Bundt cake in a microwave, Ustinov’s eyes never left her. Dominika knew she had to simultaneously obliterate his body as well as his head, he had to want her to stay with him. A week, two weeks, two months. Any amount of time would satisfy the requirements, the longer the better, they said. They had told her the sidewalk outside Ustinov’s apartment was stained with the tears of his one-night stands.

Ustinov was slowly revolving toward her. When he came even with where Dominika was kneeling, he put his arms around her waist, threw her on her back—she registered the tug of tearing panties—hunched over her like a gargoyle and began making passionate, if feral, love to her.

In the red light, Ustinov’s clenched teeth—normally white and even—appeared blue and black-rimmed. Dominika threw her head back and closed her eyes. She felt Ustinov’s hot breath on her breasts. The pink sparks of light flowed over her quivering legs, their bodies, and the mirrors. She lifted her buttocks and rocked her pelvis to meet each of his lupine thrusts, clapped her hands around his arms and concentrated on making him lose his sanity. Ustinov pulled his head back in a paroxysm of impending meltdown. Dominika involuntarily huffed as he began moving harder and faster. Apart from the red light, and his blue teeth, and his grunting, Dominika was surprised to feel her own body—her secret self—responding; the bitter-tongue lift from the Benzedrine had arrived. She looked past his chin at the glass ceiling but she could not see any celestial bodies. Where were the stars?

What she did see was an Angel of Death. First she saw a reflected blur on the glass ceiling panels. The blur became a shadow gliding toward the bed, across each mirrored panel like poured black mercury, reflected a hundred times. Dominika felt a pulse of air as the apparition floated above Ustinov’s head. The gangster’s eyes were sightless with passion. He sensed nothing. A sprung steel wire flashed across Ustinov’s throat, drawing tight with a musical zing, cutting into his flesh. Ustinov’s eyes snapped open, and his hands scrabbled at the wire garrote now cutting into his windpipe. With his fingers digging at the wire, Ustinov’s face hung suspended inches from Dominika’s. Her mouth was frozen in a silent scream. He looked at her uncomprehendingly with red-rimmed eyes, a vein on his forehead bulging, his fingers trying for purchase on the wire. His mouth sagged open, a black thread of his saliva falling on her cheek. Ustinov’s body began convulsing. He shook side to side like a fish trying to throw a hook. Dominika registered that he was still inside her; she pushed at his chest, turned her head to avoid his spittle and blood, and tried to slip out from underneath him. But he was a big man, suddenly very heavy, and she couldn’t move. Dominika could only close her eyes, cross her arms across her face, and feel Dimitri Ustinov’s life ebb out of his body. She could feel blood, from the wire cutting his throat, dripping onto her neck and breasts. Ustinov was making a gurgling sound and started going limp, his breath bubbling through the blood, blue-black in this light, of his severed windpipe. Dominika felt a tremor pass through his body, his feet drummed on the bed quickly two or three times, and then he was still. The bed revolved in the pinky silence.

Nothing happened for another terrifying minute. Dominika opened one eye to see Ustinov’s face hanging above hers, eyes open, tongue visible in an open mouth. The indistinct black figure loomed over them both, unmoving, speckled by the pink dots. Were those black wings behind his shoulders, or just the reflection of the mirrors? The tableau of three motionless bodies revolved endlessly around the room. As if in a coordinated action, Ustinov slipped out of her and the black figure with a single movement dragged the body off her. It rolled off the bed onto the floor. The killer ignored the corpse, reaching over to the controls to stop the bed. Dominika made to get up, but the figure in black put his hand on her shoulder and pushed her gently back onto the bed. She was trembling, naked, and covered in blood. Her breasts were wetly black with it. The bedclothes were a tangle, but she gathered them up and tried wiping the gore off her body.

She would not look at the man, yet somehow knew he was not going to harm her. He stood at the foot of the bed, motionless, and Dominika stopped trying to sop up the blood and held the blood-black sheet in her hands. Her breath was ragged with fear and shock. The man was studying her foot, visible from beneath the sheet. He reached for her and she began to withdraw it, then out of some primal instinct kept it still. The man stroked the top of her foot lightly. Most people shake hands, but with Matorin, it was a little different.


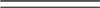


Formally, Sergey Matorin was an SVR staff officer with the rank of major assigned to the Executive Action Department (Department V). Informally, he was a chistilshchik, a “mechanic,” an executioner of the Russian secret service. In the KGB years, this department was known variously as the Thirteenth Department or Line F, or simply as mokroye delo, “wet work.” During the height of the Cold War, Line F had managed kidnappings, interrogations, and assassinations, but in the new SVR such things were said not to be even remotely contemplated or condoned. Granted, fractious Russian journalists were found shot in Moscow elevators, or regime critics succumbed to high concentrations of radionuclide polonium in their livers, but that had nothing to do with the modern Russian Foreign Intelligence Service. The age of the “umbrella pokers” had passed.

During the Soviet invasion of Afghanistan, Matorin served as a team commander in the elite Alpha Group of Spetsnaz, at that time under the command of the KGB. A screw came loose during Matorin’s five years in the valleys of Afghanistan, and the threads were permanently stripped. His eight-man team had followed orders, but Matorin didn’t much care about command. He was essentially a loner who liked to kill people.

He was hit during combat by a metal splinter that blinded his right eye, leaving it an opaque milky white. Tall, whip-thin, his face pocked and scarred, Matorin wore his gray hair plastered over a cadaverous skull. This and a sharp hook nose gave him the appearance of an undertaker. After the withdrawal from Afghanistan, on rare occasions he was seen in SVR headquarters ghosting through the offices of Department V. Younger officers stared in fascination at this throwback Polyphemus. Older employees turned away and crossed themselves.

Even though he was now deployed on occasional “special tasks,” Matorin missed the action of Afghanistan. He thought about it often. He had the ability to go back there in his mind, to see the sights, to hear the sounds, to smell the smells. Certain moments would spontaneously trigger his memories. These unexpected trips were the best, the most vivid, including the music. He could hear perfectly the staccato notes from the rubab and the crescendo beat from the tablas.

Matorin stroked Dominika’s foot just as he had stroked the foot of the pegged-out Afghan bint that one afternoon in the Panjshir Valley. His team had rigged a canopy over the blades of the Mi-24 helicopter and tied down the corners so there was a large shaded area for the men to sit. Earlier they had gunned a group of muj on the road, landed to collect booty, and found the girl hiding among the rocks by the roaring river.

She was about fifteen years old, dark hair, almond eyes, her clothes worn and dusty, the usual filthy camp follower. Every Soviet military man serving in Afghanistan had heard stories about what Afghan women did to Russians taken prisoner, so there was no love lost for the girl. She was straining with the cords around her wrists, but the double loop around her neck threatened to strangle her if she struggled too much. She swore and screamed and spat at the eight Alpha Group commandos who stood in a circle around her. Matorin squatted between her widespread legs, secured at the ankles, and watched her struggle. He reached out and held her sandy foot and caressed it. At the touch of the infidel the girl screamed and bellowed and called out to the hills, to her fellow fighters, to come to rescue her.

She needn’t have objected to someone simply touching her foot. There was more to come. In the next fifteen minutes Matorin had carefully sliced off her clothes with a short sheath knife and had unwrapped her hijab. She lay supine in the dust, under the canopy that billowed gently in the wind. A soldier poured water over her face, washing it clean, but she spat back at him, thrashing her body against the cords. Matorin reached behind his back and unsheathed a Khyber knife, two feet long, the edge of the elegantly curved, T-shaped blade bright silver from constant honing.

Lying flat behind a boulder a hundred meters up the rocky slope, an Afghan teenager put down his AK-47 and peeked around the rock. He could see the big mottled-green helicopter—he knew it only as “Shaitan Arba”—on the ground, its stationary rotors drooping with their own weight. He saw a circle of figures beneath the billowing canopy. Over the faint roar of the river and the wind in the rocks, the boy heard another sound from the valley floor: a shrill keening, a young woman’s screams, which went on and on. The boy uttered a prayer and slipped away. He knew there was something down there that was more terrifying than just infidel Russians.

Matorin got his nickname that day from his men, at least the ones who could continue watching him use his knife. “Khyber” looked down at Dominika with his poached-egg eye, took his hand off her foot, and said, “Get dressed.” She had an appointment with Uncle Vanya.

USTINOV’S RUSTIC PÂTÉ

Caramelize chicken livers, pancetta, and garlic, then deglaze pan with brandy. Hand-chop mixture with parsley, capers, shallots, lemon zest, lemon juice, and olive oil into a coarse texture. Add additional olive oil. Serve on toast with lemon.

5

After the murder of Ustinov, Uncle Vanya had summoned Dominika to Yasenevo. She was escorted to the executive elevator bank of SVR headquarters. The SVR shield of Star and Globe hung inside the elevator. Dominika still had a copper taste in her mouth, still felt the slippery sensation of Ustinov’s blood on her body. For a week she fought down the recurring horror, tried vainly to sleep, resisted the crawly impulse to physically slough the skin off her breasts and belly. The nightmares had faded, but now she was sick, and depressed, and livid at the way she had been manipulated. Then Uncle Vanya had sent for her.

She had never been to Yasenevo, inside SVR headquarters, much less on the executive fourth floor. It was deathly still; no sound came from any of the closed doors visible down the corridors. She was walked past airbrushed official portraits—each one discretely spotlighted—of former KGB directors lining one side of the long, red-carpeted hallway that led from the elevator to the executive suite: Andropov, Fedorchuk, Chebrikov, Kryuchkov. Berlin, Hungary, Czechoslovakia, Afghanistan. On the opposite wall hung the portraits of the new leadership of SVR: Primakov, Trubnikov, Lebedev, Fradkov. Chechnya, Georgia, Ukraine. Were they all in heaven or hell? The old boys’ eyes followed her as she walked down the hall.

To the right were the imposing doors of the Director’s office. To the left, identical doors led to the First Deputy Director’s office. Dominika was shown in. Uncle Vanya sat behind a large desk of polished, light-colored wood. A heavy piece of glass covered the top of the desk. Apart from a red leather blotter in front of him, the desk was clean. A bank of white telephones squatted on a credenza behind the desk. The large office, carpeted in a deep blue, had a comfortable couch and chairs at the opposite end, next to three picture windows that had a magnificent view of the pine forest. It was a brilliant winter day and sunlight streamed into the office.

Vanya motioned Dominika to take a seat. He looked at her closely. She was wearing a dark blue skirt and crisp white shirt nipped at the waist by a narrow black belt. She looked as beautiful as ever, but she had dark circles under her eyes and was noticeably pale. Using her on the Ustinov thing had been an inspired move. Too bad the experience for her had been so . . . extreme. It was her bad luck that the urgent order from the Kremlin to settle Ustinov’s hash had coincided with her departure from ballet school and her father’s death.

Neither of them spoke. According to the report, she had performed creditably, had charmed the pants off Ustinov, so much so that he had dismissed his security detail and thus given Matorin the opening to get to the target. Even though she had not had hysterics, he gathered it had been a little rough for her. Matorin was a bit much for the uninitiated. She would get over all that.

“Dominika, I commend you on your excellent performance in the recent operation,” said Vanya. He looked evenly at his niece from across the desk. “I know it must have been difficult, a shock.” He leaned forward. “It’s over now, you can forget the unpleasantness. Of course, I don’t have to tell you about your duty, your responsibility, never to mention this to anyone, ever.”

Her mother had told her to always be careful around him, but she was wound up. Throat tightening, Dominika looked at the yellow haze around him. Her voice quavered. “You say ‘unpleasantness.’ I watched a man murdered a foot from my face. We were naked, he was on top of me, as you well know. I was covered in his blood, my hair was matted with it. I can still smell it.” She saw her uncle’s eyes and felt his unease. Be careful, she thought, there was an undercurrent of anger there too. Her voice soft again: “Just a little favor, a simple matter, you said, I’d be helping you out.” She smiled. “He must have really done something, that you had to kill him.”

Damned impertinence. Vanya was not about to discuss politics, nor Putin’s toxic narcissism, nor the necessity of making an example of Ustinov for the benefit of the other kulaks. No, he had summoned his niece for two reasons. He wanted to assess her state of mind, to judge whether she could keep her mouth shut, whether she could put the incident behind her, recover from her trauma. And depending on the answer to the first question, he would have to consider two further options.

If Dominika rose from her chair, unhinged and refusing to listen, she could not leave the headquarters building alive. Matorin would solve the problem. Dominika might not realize it, but she was an eyewitness to a political assassination that Putin’s enemies would love to document for the world. If that happened, he, Egorov, would be forfeit. Right now certain State organs were covering Ustinov’s death as a grisly murder at the hands of a business rival. Everyone knew the truth; this had been expected. But if his twenty-five-year-old niece with Fabergé-blue eyes and a 95C bosom subsequently stood up and told what she had seen, and from what vantage point, the opposition press would never stop.

If, however, she seemed under control, he would take steps to ensure her continued discretion. His political well-being hinged on her future good behavior. He had already decided that he would accomplish this by bringing her inside, into the Service, under the permanent discipline and supervision of the Center. There would be no difficulty doing so. A job in records, in the archives. She would be accounted for, engaged in training, learning procedures and regulations. They could keep an eye on her. Depending on her performance—he did not expect much—she could be given a clerical job in one of the departments, an ornament in the outer office of some general. Later, perhaps, she could be assigned abroad, buried in a rezidentura in Africa or Latin America. After five years—by that time the directorship would be his—she could even be cashiered for cause and kicked out.

Vanya spoke softly. “Niece, it is your duty to be always loyal, to do your utmost, to serve your country. There is no question of your discretion. It is absolutely required of you. Is this going to be a problem between us?” Vanya looked at Dominika steadily as he knocked the ash off the end of his cigarette.

It was the exact moment where the next part of her life would be decided. The usual yellow halo around Vanya’s head had grown darker, as if suffused with blood, and the timbre of his voice had changed, taken on an edge. In a telepathic flash Dominika realized it, remembered her mother’s whispers. Zaledenet, she thought, summoning control. Become ice. She looked up at her uncle, whom she was beginning to detest, and also beginning to fear. Their eyes met.

“You can depend on my discretion,” she said woodenly.

“I knew I could,” said Vanya. She was a smart girl, he could see her instincts at play, she had sense. Now to put a cube of sugar on the teaspoon. “And because you have performed so well, I have a proposal.” He leaned back in his chair and lit another cigarette. “I am offering you a starting position as a staff member of the Service. I want you to join me in our work here.”

Dominika willed herself to remain expressionless, and was satisfied watching Vanya’s eyes searching her face for a reaction. “In the Service?” she said. “I have never considered it.”

“This would be a fine opportunity for you right now. Steady employment, start accumulating a pension. If you belong to the Service, I can continue to guarantee your mother can keep her apartment. Besides, what else would you do, look for a job as, what, a dance instructor?” He crossed his hands on his desk.

Dominika mentally marked the spot on Uncle Vanya’s shirt where she would plunge the pencil lying on his desk. She lowered her eyes and kept her voice calm. “Helping Mother would be important,” she said. Vanya made an Of course gesture with his hand. “It would be strange to work here,” she added.

“Not so strange,” said Vanya. “And we could work together.” The words floated above his head, changing color with the sunlight outside. Of course, thought Dominika, a staff recruit would work closely every day with the Deputy Director.

“What sorts of duties would I be assigned?” said Dominika. She knew enough already to guess the answer.

“You would have to begin at the entry level, of course,” said Vanya. “But all the functions of the Service satisfy a critical need. Records, research, archives. An intelligence organization survives or perishes on how it manages information.” Of course, they wanted her buried in the third subbasement.

“I’m not sure I know about such duties, Uncle,” said Dominika. “I don’t think I would do well.” Vanya hid his irritation. He really had only two choices with this Venus de Milo. Matorin could dispose of her before lunch, or he could get her into the Service, under control. The middle ground was unacceptable. She couldn’t be left walking around Moscow, resentment growing, perhaps thinking of getting even. Sookin syn.

“I’m sure you would learn quickly. It’s quite important work,” Vanya said. Now he was reduced to trying to convince this silly twit.

“I do think I would have an interest in another part of the Service,” said Dominika. Vanya peered over the desk at her, hands clasped and motionless. She was still sitting with a straight back, head erect, stricken. Vanya said nothing, waited. “I would like to be admitted to the Foreign Intelligence Academy as a candidate trainee.”

“The Academy, the AVR,” said Vanya slowly. “You want to be an intelligence officer. In the Service?”

“Yes, I think I would do well,” said Dominika. “You yourself said I performed satisfactorily with Ustinov in gaining his trust.” Raising Ustinov made the point. Vanya lit his third cigarette in as many minutes. Not counting the women in support functions, there had been two, perhaps three, women in the First Chief Directorate in the old KGB, and one of them was an old battleax in the Presidium. None had ever been admitted to the old KGB Higher School or to the Andropov Institute or to the current AVR. The only women involved in field operations were the co-opted wives of rezidenturi officers, and the vorobey, the trained “Sparrows” who seduced recruitment targets.

But in thirty seconds Vanya Egorov made a lightning calculation. As a candidate in AVR, his niece would be under even more stringent control. Her performance, attitude, and physical whereabouts for the foreseeable future would be constantly monitored. She would be physically out of Moscow for long periods of time. If she strayed and was tempted to open her mouth, she would fall under the disciplinary jurisdiction of the Service. Her dismissal, even imprisonment, would be a matter of a stroke of the pen.

More broadly, he could generate some political profit from putting her name forward as a candidate for the Academy. He would be the high-minded deputy director who for the first time selected a woman—athletic, educated, fluent in languages—for formal training in the modern SVR. Bosses in the Kremlin would see the public-relations benefits.

From across the desk, Dominika saw his face, followed his calculations. Now would come the reluctant agreement, the inevitable stern warnings.

“You’re asking a lot,” Vanya said. “There’s an entrance examination, a high refusal rate, then long training, quite rigorous.” He swiveled in his chair to look out the picture window, considering. He had made up his mind. “Are you prepared to commit yourself to this path?” he asked.

Dominika nodded. She wasn’t absolutely sure, of course. But it would be a challenge, and that appealed to her. She was also loyal, she loved her country, she knew she wanted to try to join one of the premier organizations in Russia, perhaps, she thought, even to contribute. The Ustinov killing had repulsed her, but it also had shown her, in the space of an evening, that she could handle secret work, that she had the brains, and the courage, and the fortitude.

There was something else, she knew, something ill-defined, something accumulating in her breast. They had used her. Now she wanted to intrude into their world, these domovladel’tsy, these landlords who abused the system and its people. She wondered what her father would think.

“I will consider it,” said Vanya, swiveling back to look at her. “If I decide to submit your name, and if you are selected, your performance in the AVR will be a reflection on me, on the whole family. You realize that, do you not?” Charming. His concern for her and the family had not kept him from throwing her at Ustinov.

She almost said, I’ll be sure to preserve your reputation, but pushed the anger back down and instead nodded again, more sure now about wanting the Academy. Vanya stood up. “Why don’t you go downstairs and have lunch? I will tell you my decision this afternoon.” He would have to clear it with the Director (gentle persuasion) and the director of training would have to be browbeaten (a pleasure). But Dominika’s place would be reserved, and the thing would be done, and his problem with her would be solved. When she left, Vanya picked up the phone and spoke briefly into it.

Dominika was escorted back down the hallway to the elevator. The former directors all looked as if they had faint smiles on their faces. In the sprawling cafeteria, Dominika ordered the kotleta po-kievski, a hard roll, and a bottle of mineral water. The cafeteria was moderately crowded and Dominika had to search for an empty seat. She found a table where two middle-aged women were sitting at the other end. They looked at the beautiful young girl with the tired eyes and the visitor’s badge, but said nothing. Dominika began eating. The chicken was lightly breaded, golden brown, and delicious. A trickle of butter came from the rolled-up cutlet; there was the rich taste of garlic and tarragon. The cutlet morphed into Ustinov’s throat and the butter sauce turned vermilion. She put down her knife and fork with trembling hands. Dominika closed her eyes and fought the nausea. The two women at her table were looking at her. This was not something you see every day. They didn’t know how right they were.

Dominika looked up and saw swirling black. Sergey Matorin was sitting at the table across from hers, leaning over a bowl, spooning soup into his mouth. He was staring at her as he ate, his dead eye unblinking, just as a wolf watches even while drinking at a brook.

SVR CAFETERIA CHICKEN KIEV

Mix and chill compound butter with garlic, tarragon, lemon juice, and parsley. Pound chicken breasts into wafer-thin cutlets. Roll tightly around thumb-sized pieces of compound butter, tie with twine. Dust with seasoned flour, dip in egg wash, coat with bread crumbs. Fry until golden brown.

6

Dominika entered the SVR’s Academy of Foreign Intelligence (AVR) soon after her father’s funeral. The school had been renamed several times during the Cold War, from the Higher Intelligence School to the Red Banner Institute to the AVR, but veterans simply called it School No. 101. The main campus for decades had been located north of Moscow, near the village of Chelobityevo. By the time it became the AVR, the school had been modernized, the curriculum streamlined, admission criteria liberalized. The campus had moved to a clearing in the dense forests east of the city at kilometer twenty-five on the Gorky Highway. It was therefore now referred to as “Kilometer 25” or simply “the Forest.”

In the early weeks, wary and excited, Dominika, the only woman, and a dozen new classmates were driven in rattling PAZ buses with darkly tinted windows to various locations around Moscow and the surrounding suburbs. They rolled through sliding metal gates into anonymous walled compounds registered as laboratories, research centers, or Pioneer Youth camps. The days were filled with lectures about the history of the Services, of Russia, of the Cold War, and the Soviet Union.

Whereas the chief attribute previously required for acceptance into former KGB schools was fealty to the Communist Party, the modern SVR required of its trainees an overarching devotion to the Russian Federation and a commitment to protect it from enemies within and without.

For the first period of indoctrination, trainees were evaluated not only for aptitude but also for what in the old KGB would have been called “political reliability.” Dominika excelled in class discussions and written assignments. There was a hint of the independent streak in her, of impatience with time-tested formulations and dicta. An instructor had written that Cadet Egorova would hesitate for just a second before answering a question, as if she were considering whether she chose to answer, then invariably respond with excellence.

Dominika knew what they wanted to hear. The slogans in the books and on the chalkboards were kaleidoscopes of color, they were easy to categorize and memorize. Tenets of duty, loyalty, and defense of the country. She was a candidate to become a part of Russia’s elite, the Sword and Shield of yesterday, the Globe and Star of today. Her youthful ideology had once horrified her freethinking father—she knew that now—and she no longer totally accepted the ideology. Still, she wanted to do well.

The start of the second training block. The class had moved permanently to the Kilometer 25 campus, a cluster of long, low buildings with pitched-tile roofs, surrounded by pines and stands of birch. Sweeping lawns separated the buildings, gravel paths led to the sports fields behind the buildings. The campus was a kilometer off the four-lane Gorkovskoye shosse, screened first by a tall wooden palisade, painted green to blend in with the trees. Past this “forest fence,” three kilometers farther into the woods, ran two additional wire fence lines, between which black Belgian Malinois hounds ran free. The dog run could be seen from the windows of the small classrooms, and from their rooms in the two-story barracks the students could hear the dogs panting at night.

She was the only woman in the dormitory and they gave her a single room at the end of the corridor, but she still had to share the bathroom and shower room with twelve men, which meant she had to find quiet times in the mornings and evenings. Most of her classmates were harmless enough, the privileged sons of important families, young men with connections to the Duma or to the armed forces or to the Kremlin. Some were bright, very bright, some were not. A few brave ones, used to getting what they wanted and seeing that silhouette behind the shower curtain, were ready to risk it all for a tumble.

She had reached for her towel on the hook outside the shower stall in the gang bathroom late one night. It was gone. Then a knuckly classmate with sandy hair, the burly one from Novosibirsk, stepped into the stall with her, crowding behind her, his arms around her waist. She could feel he was naked as he pushed her face against the wall of the shower and nuzzled her wet hair from behind. He was whispering something she couldn’t understand; she couldn’t see the colors. He pressed up against her harder and one hand drifted from around her waist to her breasts. As he squeezed her, she wondered if he could feel her heartbeat, if he could feel her breathing. Her cheek was pressed against the white tiles of the stall, she could feel them changing like prisms hung in sunlight, they were turning dark red.

The tapered, three-inch faucet handle for the cold water had always been loose, and Dominika wiggled it back and forth until it came off in her hand. She turned slippery and breathy to face him, breasts now crushed against his chest, and said, “Stojat,” wait, wait a second, through a constricted throat. He was smiling as Dominika drove the pointed end of the faucet handle into his left eye up to her knuckle and his vomit-green scream of pain and terror washed over her as he slid down the wall clutching his face, his knees pulled up tight. “Stojat,” she said again, looking down at him, “I asked you to wait a second.”

“Attempted rape and justifiable self-defense” was the secret AVR review board’s judgment, and Novosibirsk gained a one-eyed bus conductor and the board recommended that Dominika be separated from Academy training. She told them she had done nothing to cause the incident, and the panel—a woman and two men—looked her up and down and kept straight faces. They were going to do it to her again. Ballet school, Ustinov, now the AVR, and Dominika told the panel she would lodge a formal complaint. To whom would she complain? But word of the incident got back to Yasenevo and Deputy Director Egorov cursed so foully over the phone that Dominika would have seen brown treacle flowing out of the earpiece, and they told her the decision had been made to give her another chance, under probationary status. From then on the rest of her class ignored her, avoided her, a klikusha walking between the buildings in the Forest, an impossibly straight back and long elegant steps with the faintest hitch in her stride.


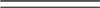


The start of the third block of AVR. They filed into classrooms with plastic chairs, and pebbled acoustic tiles on the walls, and clunky projectors hanging from the ceiling. Dead flies lay in piles between the double windowpanes. Now came instruction in world economies, energy, politics, the Third World, international affairs, and “global problems.” And America. No longer referred to as the Main Enemy, the United States nevertheless was her country’s main competitor. It was all Russia could do to maintain superpower parity. Lectures on the subject took on an edge.

The Americans took them for granted, they ignored Russia, they tried to manipulate Russia. Washington had interfered in recent elections, thankfully to no avail. America supported Russian dissidents and encouraged disruptive behavior in this delicate period of Russian reconstruction. American military forces challenged Russian sovereignty, from the Baltic to the Sea of Japan. The recent “reset” policy was an insult, nothing needed to be reset. It was simply that Russia deserved respect, the Rodina deserved respect. Well, if, as an SVR officer, Dominika ever met an American, she would show him that Russia deserved respect.

The irony was that America was in decline, said the lecturers, no longer the high-and-mighty US. Overextended in wars, struggling economically, the supposed birthplace of equality was now divided by class warfare and the poisonous politics of conflicting ideologies. And the foolish Americans didn’t yet realize they would soon need Russia to hem in a galloping China, they would need Russia as an ally in a future war.

But if Americans chose to pit themselves against Russia, thinking she was feeble and weak, they would be surprised. A student in the class disagreed. He suggested that yesterday’s notions of “East and West” were antiquated. Besides, Russia had lost the Cold War, get over it. There was a hush in the classroom. Another classmate stood, eyes flashing. “Russia most certainly did not lose the Cold War,” he said. “It never ended.” Dominika watched the scarlet letters ascend to the ceiling. Good words, strong words. Interesting. The Cold War never ended.


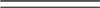


Not long after, Dominika was separated from the rest of her class. She had no need for language instruction, for she could have been an instructor herself in spoken English or French. Nor was she hustled off to the administrative track. Her instructors had seen her potential, had passed it on to AVR administrators, who in turn had called Yasenevo and requested the Center’s permission to admit Dominika Egorova—niece of the First Deputy Director—into the practical, or operational, phase of training. She would be the rare female candidate trained by the SVR as an operupolnomochenny, an operations officer. There were no delays. Approvals from the Center had already been granted.

She had been admitted to operations training, the Real Steel, the Game; she had entered a special phase, the last chrysalis stage before she would emerge to serve the Motherland. The time passed without her knowing it. Seasons seemed to change without her being aware of them. Classes, lectures, laboratories, interviews all came in a dizzying rush.

It started with ridiculous subjects. Sabotage, explosives, infiltration, first taught when Stalin raved and the Wehrmacht encircled Moscow. Then came the more practical lessons, and they worked her hard. She developed legends, zashifrovat’, her cover for movement, ran routes to detect opposition surveillance on the street, found safe houses, transmitted secure messages, found meeting sites, yavki, ran vstrechki, agent meetings, plotted recruitment approaches. She practiced with disguises and digital communications, signals and caches. Her memory for detail, for lessons learned, astounded them.

Instructors in unarmed-combat class were impressed by her strength and balance. They grew a little alarmed at her intensity and the way she wouldn’t stay down on the mat after having been thrown. Everyone had heard the story from the Forest, and the wide-eyed men in the class watched her hands and knees and protected their mudya when sparring with her. She saw their faces, saw the green breath of their disapproval and fear as they huffed and grunted in the gymnasium. No one came near her voluntarily.

The practical instruction continued. They brought her to downtown Moscow, to the streets that were used as a living classroom to practice tradecraft principles taught in the dingy classrooms around Yasenevo. The streetcraft instructors were pensionerki, old spooks, some of them seventy years old, retired decades ago. They had some difficulty keeping up with Dominika as the exercises accelerated. They watched her bunched dancer’s calves striding long on the shimmering Moscow sidewalks. The slight telltale limp from her shattered foot, now mended, was endearing. She was driven, determined to excel. Her face shone with perspiration, the sweat darkened her shirt between her breasts and across her ribs.

The colors helped her on the street; the blues and greens from the teams in the radio cars and the watcher vans made it possible to pick out coverage among the crowds on broad boulevards. She twisted surveillance teams around themselves, meticulously timed brush passes on crowded Metro platforms, met practice agents in dirty stairwells at midnight, controlled the meetings, read their minds. The old men would mop their faces and mutter, “Fanatichka,” and she would laugh at them, her hair pulled back tight on her head, her shoulders straight, secretly reading the colors of their breathless approval. Come on, dinozavry, come on, you old dinosaurs. The gruff old men secretly loved her, and she knew it.

These ancient instructors were supposed to coach her on what conditions would be like abroad, on what she could expect on the street, on how to operate in foreign capitals. Glupost, thought Dominika, what stupidity, that these old men who had last been overseas when Brezhnev ordered troops into Afghanistan were telling her what to expect on the streets of modern-day London, New York, or Beijing. She had the temerity to mention the incongruity to a course coordinator, who told her to shut her mouth and reported her comments up the line. Her face flushed at being spoken to that way, but she turned away, cursing herself. She was learning.


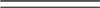


As she was being evaluated, Dominika began courses on the psychology of intelligence collection, the psyche of sources, on understanding human motivations and identifying vulnerabilities. An instructor named Mikhail called it “opening the human envelope.” He was a forty-five-year-old SVR psychologist from the Center; Dominika was his only student. He walked her around Moscow, both observing people, watching interactions. Dominika did not tell him about seeing colors, for her mother long ago had made her swear never to mention it. “And how in God’s name do you know that about him?” Mikhail would ask when Dominika whispered that the man sitting on the next park bench was waiting for a woman.

“It just seems that way,” she would reply, never explaining that the bloom of passion-purple around the man flared when the woman came around the corner. Mikhail laughed and looked at her in amazement when it turned out to be right.

As Dominika focused on these practice sessions, her refined intuition told her she was having an effect on Mikhail. Even though he initially featured himself as a stern instructor from Directorate T, she would catch him looking at her hair or stealing darting glimpses at her body. She mentally counted the times he contrived to bump into her, or touch her on the shoulder, or put his hand on the small of her back when going through a door. He radiated desire, a dark crimson fog lingered around his head and shoulders. She knew how he liked his tea, when he needed his glasses to read a menu, the rate of his heartbeat when pushed close against her in the Metro. She could see Mikhail stealing looks at her unpolished nails, or watching her dangle a shoe off her foot at the café table.

It was a monstrous risk to sleep with him. He was an instructor, and a psychologist to boot, charged with evaluating her personality and suitability for operations. Yet she knew he would say nothing, she knew she had an indefinable hold over him, and making love, a grave dereliction during training, was an edgy thrill, more than physical pleasure.

Of which there was a considerable amount. An afternoon after a street exercise, they found themselves in the apartment Mikhail shared with his parents and brother, all at work or away from the house. The coverlet from his bed was on the floor and her thighs trembled and her shoulders shook and her hair framed her face as she straddled him, pulses running up her spine and down to her toes, especially those of her once-broken foot. She knew what she wanted, her secret self had been neglected of late, what with school and training and barracks. She trapped him—who was impaled upon whom?—and rocked strongly downward, giving herself what she needed, while she was still fresh. There would be time for softness and cooing and sighing later. Right now her eyes were half-closed, and she concentrated on coaxing the building pressure, stronger, stronger—povorachivaisya! come on!—into the sudden teetering flush that made her double over, too sensitive to continue, too sweet to stop. Her vision cleared and she brushed the hair off her face, aftershocks cramping her thighs and toes. Mikhail lay wide-eyed and silent beneath her, a bystander unsure of what he had just witnessed.

Afterward, he kept taking sidelong glances at her while he made a pot of tea. Wrapped in a sweater and sitting at the kitchen table, Dominika guilelessly looked at him, and the psychologist in Mikhail simultaneously knew the sex had had nothing to do with him. He likewise knew he would say nothing about it, ever. And that they would never do it again. In a way, Mikhail was relieved.


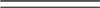


The operations course was coming to an end, the last leg of the tripod of training nearly complete. The exhausted pensioners who trained Dominika had long ago nicknamed her mushka, beauty spot, also the colloquialism for the front sight of a gun, the sight that picks up the target first. Completing their evaluations, they positively assessed her industrious spirit, they remarked on her intellect and wit and on her sometimes inexplicable intuitions on the street. Her loyalty and dedication to the Rodina were unquestioned. One or two pensioners noted that she was impatient. She could be argumentative, she needed to develop more flexibility in recruitment approaches. One old-timer alone wrote that despite her superior performance he believed she lacked true patriotic zeal. Her natural independence eventually would unseat her devotion. It was a feeling, an impression; he could not cite any examples. The comment was discarded as the addled thought of an old fool. In any case, Dominika was never shown any of the evaluations.

All that remained was a final practical exam on the street, using techniques, honing her tradecraft. A final exercise, a written examination, an exit interview. She was almost through. Before any of that happened, however, and to the consternation of her instructors, Dominika disappeared from the course: summoned immediately to the Center, “required for special duty,” was all they said.


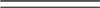


Dominika was told to report to a room at the other end of the fourth floor of Yasenevo, near the portraits of the directors. She knocked at a plain mahogany door and went inside. It was an executive dining room, small, wood-paneled, carpeted in deep wine-red, windowless. Polished wood and antique sideboards gleamed in the recessed lighting. Uncle Vanya was seated at the far end of a dining table covered by a snowy white tablecloth and set with Vinogradov porcelain. Crystal glasses twinkled in the light. He got up from his chair when he saw Dominika enter and walked down the length of the table to greet her with a vigorous hug around the shoulders. “The graduate has come home.” He beamed, holding her at arm’s length. “Top of your class, top marks on the street, I knew it!” He put her arm in his and walked her down the room.

There was another man sitting at the other side of the table, quietly smoking a cigarette. He looked to be fifty years old, with a red-veined tetrahedron for a nose. His eyes were dull and watery, his teeth corrugated and stained, and he slouched with the familiar casual authority honed on the razor strop of decades of Soviet officialdom. His tie was askew, his suit was a washed-out brown that recalled low tide at the beach. It matched the gaseous brown bubble that surrounded him as he sat. It was not the color—blacks and grays and browns assuredly were trouble—it was the paleness of the color and how it enveloped him in soft focus. He is bluzhdajushiy, devious, thought Dominika, not to be trusted.

Dominika sat across from him, meeting his appraising stare with unblinking eyes. Vanya sat at his place at the head of the table, his paws folded demurely in front of him. Unlike the former Soviet apparatchik across from her, Vanya as usual wore an elegant pearl-gray suit, blue shirt with starched collar, and a navy tie with minute white dots. On his lapel he wore a small red ribbon with a sky-blue star—for Merit to the Fatherland, Za Zaslugi Pered Otechestvom—for significant contributions to the defense of the Fatherland. Vanya lit a cigarette with a well-used silver lighter, which he snapped closed.

“This is Colonel Simyonov,” said Vanya, nodding in the direction of the slouching man. “He is the chief of the Fifth Department.” Simyonov said nothing, but leaned forward and flicked ash into a copper ashtray beside his plate. “We have identified a singular operational opportunity,” continued Vanya. “The Fifth has been given the responsibility to carry it out.” Dominika looked from Vanya to Simyonov dully. “I have recommended to the colonel that you would be uniquely suited to assist in the operation, especially since you have completed your training at the Academy with an excellent record. I wanted the two of you to meet.”

What is this nonsense? thought Dominika. “Thank you, General,” she said. She took care not to call him “Uncle” in the presence of a senior officer. “I still have two weeks to complete. There is a final exercise and the closing evaluations. I—”

“Your final evaluation is complete,” interrupted Vanya. “There is no need to return to the AVR. In fact, I want you to begin additional training in preparation for this operational assignment with Simyonov.” Vanya stubbed out his cigarette in an identical ashtray at his side.

“May I ask the nature of the assignment, General?” said Dominika. She looked at the two impassive faces. They both were too smart to give anything away with a look, but they didn’t know what else Dominika could see. Their respective bubbles swelled around their heads.

“For now it is sufficient to tell you that this is a potentially important case, a konspiratsia of some delicacy and sensitivity,” said Vanya.

“And the nature of the additional training?” asked Dominika. She kept her voice level, respectful. A door at the end of the room opened and an orderly entered carrying a silver salver on a tray.

“Lunch has arrived,” said Vanya, sitting up. “Let us talk about the project after we eat.” The waiter lifted the lid and began serving steaming golubtsi, large square cabbage rolls, fried brown and swimming in a thick sauce of tomato purée and sour cream. “The best of Russian cooking,” said Vanya, pouring red wine into Dominika’s glass from a silver decanter. This was a charade: Dominika’s newly trained operational antennae were buzzing. She had no appetite for the heavy food.

Lunch lasted a dreary half hour. Simyonov uttered three words the entire time, though he continued to stare at Dominika from across the table. His expression was one of distinct boredom, with an air of not wanting to be in the room. Finished eating, he scrubbed his mouth with his napkin and pushed away from the table. “By your leave, General,” he said. He gave Dominika another appraising look, nodded in her general direction, and left the room.

“Let’s have tea in my office,” said Vanya pushing back his chair. “We’ll be more comfortable there.”

Dominika sat warily upright on the couch in Vanya’s office, the view of the Yasenevo forest in front of them. Dominika was dressed in a white shirt and black skirt, her hair pinned up, the informal uniform at the Academy. Two glasses of steaming tea in magnificent antique Kolchugino podstakannik tea-glass holders sat on the table in front of them.

“Your father would be proud,” said Vanya, sipping carefully.

“Thank you,” said Dominika, waiting.

“I congratulate you on your achievement and on your entrance to the Service.”

“The training was challenging, but everything I could have hoped for,” said Dominika. “I am ready to start work.” It was true. She soon would be on the front lines.

“It is always an honor to serve your country,” he said, fingering the rosette on his lapel. “There is no greater honor.” He looked at his niece carefully. “This operation with the Fifth, it’s not something that comes along every day, especially not for a recent graduate.” He sipped at his tea.

“I am eager to learn more,” said Dominika.

“Suffice it to say that the operation is a recruitment approach to a foreign diplomat. It is of utmost importance that there be no razoblanchenie, no exposure, no unmasking of the hand of the Service. The diplomat must be compromised, thoroughly and without a misstep.” His voice had grown thin, serious. Dominika said nothing, waiting for him to continue. She couldn’t exactly see his words, they were indistinct and pale.

“Naturally, Colonel Simyonov expressed concern that your overall inexperience in operations, despite your excellent training record, could be a disadvantage. I assured him my niece”—he hung on the word to indicate that he had exerted his influence—“was the perfect choice. He of course soon recognized the logic of using you, especially in light of the additional training I proposed.” Dominika waited. What office would they send her to? Technical measures? Language? Subject matter tutorial? Vanya lit a cigarette and blew smoke at the ceiling. “You have been enrolled in the specialized course at the Kon Institute.”

Dominika willed herself to remain still, expressionless, coldly feeling the physical blow that started in her stomach and radiated up her back. People had whispered about the institute during training: formerly State School Four, more commonly referred to as Sparrow School, where men and women were trained in the art of espionage seduction. You’re sending me to whore school, she thought.

“This is what they call Sparrow School?” she asked, controlling the quaver in her voice. “Uncle, I thought I would be entering the Service as an officer, to be assigned to a department, to begin practicing intelligence work. This is training for prostitutki, not staff officers.” She felt she could hardly breathe.

Vanya looked at her evenly. “You must look at this interval positively—this training will reveal to you other options when you begin managing operations on your own in the future.” He sat farther back on the couch.

“And the operation against the diplomat, do you intend that it should be a plovaya zapadnya, a honey trap?” She had read about the grimy sex operations while in the Academy.

“The target is zastenchivyj, timid, shy. We have assessed his vulnerabilities over many months. Colonel Simyonov agrees that he is susceptible.”

Dominika stiffened. “The colonel knows about what you want me to do, about Sparrow School?” She shook her head. “He was staring at me across the table. He might as well have opened my mouth and checked my teeth.”

Vanya interrupted, his voice now a little edgy. “I’m sure he was very impressed, he is a veteran officer. And all operations are unique in their own ways. There has been no final decision made as yet on how to proceed. Nevertheless, this is an immense opportunity for you, Dominika.”

“I cannot do this,” Dominika said. “After the previous operation, how it ended, it took me months to forget Ustinov’s—”

“You’re bringing that up? Didn’t you remember my instructions to you to forget that episode, never to refer to it?” Vanya said. “I require absolute compliance in that regard.”

“I have never uttered a word,” Dominika snapped back. “It’s just that if this is another of those operations, I’d rather—”

“You’d rather? You are a graduate of the Academy and a junior officer in the Service now. You will obey orders, accept assignments given to you, and do your duty. You will defend the Rodina.”

“I am committed to serving Russia,” said Dominika. “It’s just that I object to being used in these sorts of operations . . . There are people who do this work regularly, I have heard about them. Why not use one of them?”

Vanya frowned. “Stop talking. Not another word. You don’t have the sense to see what I’m offering you. You’re thinking about yourself, about your childish preoccupations. As an SVR officer you have no preferences, no choices. You accomplish what you are told to do with excellence. If you choose not to accept, to allow your frantic prejudices to derail your career before it begins, tell me now. We will release you from the Service, close your file, cancel your pension, and withdraw your privileges—all of them.”

How many times will my mother’s neck be put into the noose? thought Dominika. What else would they make her do to let her serve with honor? Vanya saw her shoulders slump. “Very well,” she said, rising. “With your permission, may I go?”

Dominika got up and walked in front of the picture window toward the door, the sun highlighting her hair, framing her classic profile. Vanya watched her walk across the carpet—did she limp a little?—and stop briefly at the door to turn and look back at him. A shiver ran over his scalp as he saw the blue eyes, intense and unblinking, ripsaws and scalpels, fix on his face for three alarming seconds. Glowing like wolves’ eyes just beyond the lights of the bliznye, the dacha. He had never seen a look like that in his life. Before he could say anything else, she was gone, like a klikusha in the Krasny Bor Forest.

SVR GOLUBTSI

Blanche cabbage leaves, cook rice. Sauté chopped onions, carrots, and peeled and seeded tomatoes until soft, incorporate with the rice and ground beef. Fold cabbage leaves around two spoons of mixture to form large square envelopes. Fry in butter until brown, then simmer for one hour in stock, tomato sauce, and bay leaves. Serve with reduced sauce and sour cream.

7

Nate Nash arrived at Helsinki-Vantaa Airport after a two-hour flight. The modern airport was sparkling and well-lit. Like at Sheremetyevo, there were flashy advertisements for cologne, watches, and vacation trips. Airport shops stocked with lingerie, gourmet food items, and magazines stretched down the airy terminal. But the lingering smell of cooked cabbage, rosewater cologne, and wet wool was missing. Instead, cinnamon buns were baking somewhere. As Nate collected his single suitcase, cleared customs, and headed to the taxi stand outside, he did not see a short man in a plain dark suit watching him from across the arrival hall. This man spoke briefly into a cell phone and turned away. In thirty minutes, nine hundred kilometers to the east, Vanya Egorov knew that Nash had arrived in Finland. The Game would begin.

The next morning, Nate walked into the office of Tom Forsyth, Chief of Station in Helsinki. Forsyth’s office was small but comfortable, with a single nautical painting hanging above his desk and a small couch against the opposite wall. A framed photo of a sailboat on a glassy ocean stood on a table beside the couch, with another framed photo of what appeared to be a youthful Forsyth at the wheel beside it. Shades in the office were drawn over a single window.

Forsyth was tall and lean, in his late forties, with receding gray hair and a strong chin. Intense brown eyes looked up at Nate over the top of half-moon glasses. Forsyth smiled, threw a sheaf of papers into an in-box, and got up to shake hands from across the desk. His handshake was firm and dry. “Nate Nash,” he said with a smooth voice. “Welcome to Station.” He gestured for Nate to sit in a leather chair in front of his desk.

“Thanks, Chief,” said Nate.

“You in an apartment? Where did the Embassy put you?” asked Forsyth. The Embassy housing office had that morning deposited him in a comfortable two-bedroom flat in Kruununhaka. Nate had been delighted when opening the double doors to a small balcony with a view of the marina, the ferry terminal, and the sea beyond, and he told Forsyth so.

“It’s a nice area, an easy walk to work,” said Forsyth. “I’d like you to huddle with me and Marty Gable to get an idea of what we’ve got going.” Gable was the Deputy Chief of Station, whom Nate had not met yet. “We’ve got a couple of good cases, but there’s more we can do.

“Forget about the internal target, the Finns are allies and we’ve got them covered. Marty and I work liaison, so you don’t have to worry about the internal service. We’ll pass along any unilateral possibilities that we develop.

“All the usual Arabs—Hezbollah, Hamas, Palestinians—they’ve all got reps in town. Might be tricky getting close to them, so think about access agents. Iranians, Syrians, Chinese. Small embassies, and they feel safe here in neutral Scandinavia. The Persians might be looking for embargoed equipment. Check them out on the dip circuit,” Forsyth said, tilting back in his office chair.

“I want to go after something bigger,” said Nate. “I have to score big after what happened to me in Moscow.” Indeed, thought Forsyth. He saw worry behind the eyes, determination in the set of the jaw. Nate sat upright in his chair.

“That’s fine, Nate,” said Forsyth, “but any recruitment, as long as it’s productive, is a good recruitment. And you land the big fish by being patient, by working the circuit, by generating a dozen developmental contacts.”

“I know that, Chief,” said Nate quickly. “But I don’t have the luxury of time. That Gondorf is gunning for me. If it weren’t for you, I’d be back in Russian Ops in front of a computer, pushing a mouse. I never told you how much I appreciate your asking for me.”

Forsyth had read Nate’s personnel file, sent out to Station when Nate’s lateral assignment had been approved. Not many young case officers with near-fluent Russian. Top marks throughout training at the Farm, and subsequently in “denied area” training for Moscow, the art of operating under constant hostile surveillance. The file also positively noted Nate’s performance in Russia, especially his handling of a sensitive restricted case—no details.

But Forsyth now saw a distracted young case officer squirming in front of him. With something to prove. Not good, makes you accident-prone, always swinging for the fences with your eyes closed.

“I don’t want you worrying about Moscow. I talked to some people in Headquarters and you’re fine.” He saw Nate’s face working at the thought of his hall file. “And I want you to listen to me,” said Forsyth. He stopped until he had Nate’s attention. “I want you to work smart, good tradecraft, no shortcuts. We all want the big cases—hell, you’re handling one now—but I won’t accept half-assed operations. Clear?” Forsyth looked hard at Nate. “Clear?” he repeated.

“Yessir,” said Nate. He got the message, but told himself he was going to find agents, he wasn’t going to flame out as a case officer. He was not going home. He flashed to crazy-quilt images of him in a Richmond country club sitting across from Sue Ann or Mindy, bee-stung lips and frosted hair piled high, as his brothers putted golf balls across the tartan plaid rug into one of Missy’s pink Lilly Pulitzer flats lying on the rug across the club room. Fuck no.

“Okay,” said Forsyth. “Find your desk. It’ll be the first office down the hallway. Get out of here and go find Gable,” he said, reaching for his in-box.


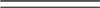


DCOS Marty Gable was sitting at his terminal in another small office one door down from Forsyth’s, trying to figure out how to write a cable to Headquarters without using the word “cocksucker.” Older than Forsyth, Gable was in his late fifties, big and broad shouldered, with white brush-cut hair, blue eyes, and a steel girder for a nose. His forehead was tanned and ruddy, the weather-beaten face of an outdoorsman. Knuckly brown hands dwarfed his keyboard, immobile. He hated drafting cables, hated typing with two fingers, hated the bureaucracy. He was a street guy. Nate stood in the doorway of his office. It was totally bare, unadorned save for a government-issue picture of the Washington Monument on the wall. His desktop was empty. Before Nate could knock courteously on the door frame, Gable swiveled in his chair and looked at Nate with a scowl.

“You the new guy? Cash?” bawled Gable. The accent was somewhere from the Rust Belt.

“Nash. Nate Nash,” said Nate, as he walked to the desk. Gable remained sitting but extended his frying-pan hand. Nate tensed for the inevitable bone-crushing grip.

“You took your time getting here. You recruit anyone on the way in from the airport?” Gable laughed. “No? Well, there’s time after lunch,” he said. “Let’s go.” On the way out of the Station, Gable stuck his big Rottweiler head into several offices along the hallway, checking to see what the other Station case officers were doing. They were empty. “Good,” said Gable, “everyone’s ass out on the street. The fucking world as it should be.”

Gable took Nate to lunch in a grubby little Turkish restaurant in a small snow-filled alley near the train station. The steamy single dining room had half a dozen tables, a pass-through window from the kitchen, and a framed portrait of Atatürk on the wall. People were yelling in the kitchen, but when Gable went to the window and clapped his hands the noise stopped. A thin dark man with a black mustache and an apron parted the bead curtain and came out of the kitchen. He embraced Gable briefly and was introduced as Tarik, the owner. The Turk shook hands loosely without looking into Nate’s eyes. They took a corner table and Gable pulled out the chair he wanted Nate to sit in, against the wall with a view of the door. Gable sat with his back to the other wall. Speaking Turkish, Gable ordered two Adana kebabs, two beers, bread, and salad.

“I hope you like spicy,” said Gable. “This little shithole has the best Turkish food in the city. There are a lot of immigrants from Turkey around here.” Gable looked at the kitchen. He leaned forward. “I popped Tarik about a year ago, support asset, you know, pick up mail, pay rent on a safe house, keep his ear to the ground. A couple hundred a month and he’s happy. If we need to, we can tap into the expat community in Helsinki.” Gable straightened as the food came, two long flat kebabs speckled with red pepper, grilled a dark brown. A large broiled flatbread, splashed with melted butter, was underneath. Raw onion salad sprinkled with dark red sumac and lemon was piled on the side of the plate. Two sweating bottles of beer were plunked on the table as Tarik muttered, “Afiyet olsun, may it be good for you,” and withdrew.

Gable began eating before Nate picked up his fork. He wolfed food, talking and moving his big mitts in the air. “Not bad, eh?” he asked of the kebabs, his mouth full. He upended his beer and drank half the bottle. His jaws snatched at the food, gazelle going down the gullet of a crocodile. Without preamble or embarrassment, he asked Nate what the fuck had happened in Moscow between him and that asshole Gondorf.

Mortified, his worries rekindled, Nate explained briefly, a few sentences. Gable pointed at him with his fork. “Listen up: Remember two things about this fucking business. You can never mature as an operator unless you’ve failed, large, at least once. And you’re judged by your accomplishments, the results you bring, and how you protect your agents. Nothing else matters.” The other half of the bottle disappeared and Gable called for another. “Oh, and there’s another thing,” he said. “Gondorf’s a douche bag. Don’t worry about him.”

Gable was finished with his entire plate before Nate even had gotten through half of his. “Did you ever fail in your career?” he asked Gable.

“Are you kidding?” said Gable, tilting back his chair. “I was in the shit so often I rented the top floor of the latrine. That’s how I got here. After the most recent train wreck, Forsyth saved my ass.”


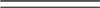


Gable’s career had been spent primarily on the Shithole Tour—Third World countries in Africa and Asia. Some case officers make their bones in the restaurants and hotel rooms and sidewalk cafés of Paris. Gable’s world was one of midnight meetings on deserted dirt roads in red-dust-covered Land Rovers. Other officers tape-recorded their meetings with government ministers. Gable wrote secrets into a sweat-damp notebook while sitting with agents sour with fear, making them concentrate, making them stay fucking on topic. They would sit in the heat, engine block ticking, with the windows up, watching the heads of the mambas part the tops of the tall grass on either side of the vehicle. Nate had heard that Gable was a legend. He was loyal to his assets, then to his friends, then to the CIA, in that order. There was nothing he hadn’t seen, and he knew what was important.

Gable sat back and sipped his beer, started talking. Last assignment was in Istanbul, big fucking town, good ops, Dodge City. Spoke pretty good Turkish, knew where to go, who to see. Pretty fast he’d recruited a member of the PKK, the benighted Kurdish separatist terror group from eastern Turkey. They’d been leaving bombs in briefcases in government buildings, or shoeshine kits in the bazaar, or paper sacks in trash cans in Taksim Square.

One day Gable got into a taxi driven by a Kurd kid, twenty, twenty-one years old. Sounded sharp, drove okay. Listen up, you got to keep your eyes open, all the time. He had a hunch, an instinct, so he told the kid to stop at a restaurant, invited him to eat with him, this Kurd kid. He had to stare down the fat Turk motherfucker behind the counter, they all hated Kurds, called them “mountain Turks.”

Kid ate like he was hungry. Talked about his family. Gable smelled PKK, so he hired the taxi for a week of driving around. Hunch paid off. Kid was a member of a local cell but didn’t buy the terrorism bullshit. A little respect, five hundred euros a month, a nice little recruitment. All because Gable kept his eyes fucking open in a taxi. Don’t forget that.

The kid started with useless shit, but Gable straightened him out—called agent handling for a fucking reason—and they focused on cell leaders, how they got their orders, how the couriers traveled. Not bad, but Gable pushed the kid, and they started getting the locations of PKK warehouses where they stored the Semtex or whatever they were using, Nitrolit from Poland. Then he started passing the names of the bomb-makers.

It was getting good and we had to keep a cold compress on the Turkish National Police because they wanted to wrap them up, “capture them dead,” they used to say. COS in Ankara was happy and the suits in Headquarters were bobbing their heads. Then Gable got cocky, lost the bubble; lesson for Nate, you always have to keep the bubble.

Young Kurd lived in Tepebaşi, fundo neighborhood down the hill from Pera, the old European quarter. Gable normally met the kid in his taxi, driving around town, never stopping, nighttime always, on the fly. Broke the rules and visited the kid’s house to meet the family. At his house. The kid had invited him, it would have been an insult to refuse, got to be culturally sensitive, goddamn it. Besides, Gable wanted to see where his agent lived. Listen up, you always know where your agents live, you never know whether you’re going to have to dig them out of the woodwork some night.

The street was steep, lined with peeling wooden row houses, faded splendor, narrow front steps, double front doors, etched-glass sidelights, all broken and boarded. Former European neighborhood, now littered with garbage and smelling of drains. In Istanbul you get used to smelling sewage, actually smells sort of sweet. Anyway, it was getting dark and lights in the houses were starting to come on. Evening call to prayer had just ended.

Gable had come down the hill dreading it. This was going to be an awkward hour full of shy, downcast eyes and endless glasses of tea. Fuck it, part of the job. As he approached the house he heard screams. His agent’s front door was open. Something breaking. Fuck, not good, neighbors would be gathering soon. Gable thought it would be a circus in approximately two minutes. He started drifting away from the house. Pretty dark by now, no one would notice him.

Trouble was, at the front door two guys were marching Gable’s agent out of the house by the armpits. The kid’s wife was slight and dark with almond eyes from the south slopes of the Taurus Mountains, torn T-shirt, barefoot. She was right behind them, screaming, beating at the men. A baby about two years old stood in the doorway buck-naked, crying. These two dickheads were as skinny as Gable’s agent, but there was no resistance, maybe because one of the dickheads held a pistol.

Jesus Christ, the kid’s in trouble with the PKK. Maybe spent the extra money, maybe bragged about his new foreign friend. Listen up, it goes south that fast. You got to protect them, sometimes you got to do it for them. The PKK took a medieval view when dealing with countrymen they thought were traitors.

Gable could have walked away. Saw the baby girl in the door—cute little thing, bubble butt and slobbering nose—and he thought, Naw, fuck it. Stepped up to the first step of the house and smiled at the dickheads. They stopped and let go of the kid, who fell on his ass on the top step. Little wife stopped screaming and looked at Gable, big fucking yabanci, foreigner with big knuckles. A dozen neighbors edging around, all Kurds. Fucking neighborhood was dead quiet, not a sound, water running down the center of the street. The dickhead with the pistol yelled something in Kurdish, sounded like sash weights in a washtub.

Big Mouth began waving the pistol, pointing it at the kid, at the wife, shaking it like a finger. Kid was one hundred percent dead if Gable didn’t do something. Fuck it, anyway, because this was the absofuckinglutely end of the case, the kid would have to skip Turkey if he wanted to stay alive. PKK guy came down a step and continued yelling at Gable. Ignored the beady eyes, focused on the pistol. Little fuck’s knuckles whiten on the grip, you know you got about three seconds. Barrel started coming up.

Gable was carrying a Hi-Power in a Bianchi belt loop behind his hip. He cleared the Browning and shot the Kurd, pop-pop-pop. Call it the Mozambique, double-tap center mass, third round forehead, suppose it was invented over there or something. Dickhead’s eyes opened, fell straight down in a heap. Slid skull-first down the stairs. Pistol bounced after him, Gable picked it up, threw it clattering down a sewer grate, got to be a million guns in Istanbul’s sewers. Gable’s spent brass hadn’t hit the pavement before the neighbors bolted like fucking squirrels, going in all directions, shutters slamming up and down the hill.

The Kurd kid held his wife. Wondered if the kid realized their new life started right then, maybe, the wife probably did, looked smart, nipples showing through that T-shirt. Gable looked at the other PKK guy, who’s seen Jesus, or Muhammad, whatever, and the guy held his hands in front of him, palms out, walked down the steps, and ran down the street into the dark.

Gable gave the kid five grand to clear out, couldn’t get any more out of Headquarters. Don’t know where they went, maybe they’re in Germany or France. Five Kurdish kids learning German. When they turn twenty, Nate’s son can find and recruit them. Fucking crazy. Okay, now the point of this long fucking story.

Aftermath was a veritable shitstorm, I kid you not, Gable said. First it was the Consulate and the hysterical Consul General, tinny voice like a music box, then the Embassy in Ankara, then the knife-and-fork set at the State Department. Diplomat involved in fatal shooting, they were very upset, a lot of weeping. Grave repercussions. Had to leave Istanbul. The Turkish National Police gave me a plaque and a farewell dinner; they were delighted. Turkish cops love a good shoot-out. But everyone else was seriously pissed, and official CIA investigation hadn’t even started.

Gable waltzed around with Office of Security at Headquarters for a month. After forty hours of conversation they settled on “deficient tradecraft.” COS Ankara didn’t back Gable up, too much political heat, sounds like Gondorf, doesn’t it? Plenty of assholes to go in your career. Gable’s prospects for foreign operations were over for the indefinite future, it seemed, and he was stuck in a four-by-four cubicle on the Turkish desk in Headquarters, listening to a twenty-three-year-old new hire on the other side of the partition talking on the outside line to her girlfriend about getting up the nerve to fellate her boyfriend that weekend. None of the young officers even wore wristwatches, goddamn it: they told time with their fucking phones, or tablets, or whatever they’re called.

Gable didn’t feel sorry for himself, it was operations. All this happened to him, but for the right reason. Listen up, the most important thing is your agent, his security, saving his life. It’s the only thing.

At about the same time, Forsyth had just concluded his own personal shitstorm, but had bounced back and landed in Helsinki. He heard Gable was fucked—that was nothing new—and sent for him as his number two, like the old days, only there aren’t any good old days, it’s a myth. The ecstatics at Headquarters were happy to let Gable go to Finland as DCOS, no one else wanted the job and they wanted him off the desk, bad influence.

“So here we are, three fuckups, in the field, operating near the fricking Arctic Circle. And you and me drinking beer in a Turkish hash house.” Gable finished his beer and yelled, “Hesap.” When Tarik came out of the kitchen, Gable motioned to Nate. “He’s paying.” Nate laughed.

“Wait a minute,” said Nate. “What do you mean, Forsyth went through his own shitstorm? What happened to him?” Nate dug out a few euros and handed them to Tarik. “Keep the change.” Tarik smiled thinly, nodded to Gable, and retreated to the kitchen. “You overtipped, rookie,” said Gable. “Don’t let them get used to you paying out. Got to keep them hungry.” Gable got up and shrugged on his coat.

“Bullshit,” said Nate. “You paid that young Kurd five grand to get him out of Dodge, but even you admitted he was burned, useless. You didn’t have to pay him squat.” Nate looked at Gable as they turned out of the alley and walked in front of the train station. Gable avoided looking back at him, and Nate knew that Gable was more than just a tough guy. But he wasn’t going to test the limits anytime soon.

The air was cold and Nate flipped up the collar of his overcoat. “You didn’t answer me about Forsyth,” said Nate. “What’s the story?”

Gable ignored the question and continued walking down the sidewalk. “Do you know where the Russian Embassy is?” asked Gable. “China, Iran, Syria? You should be able to get in a car and drive directly to any one of them. You might have to exfil some poor bastard someday. I’ll give you a week to find ’em all.”

“Yeah, okay, no problem. But what about Forsyth? What happened?” Nate had to keep dodging around pedestrians on the snowy sidewalk as Gable bulled his way through the afternoon crowds. They got to a corner and waited to cross. Nate saw a coffee shop on the opposite side of the street. “Quick cup of coffee? Come on, I’ll buy.” Gable looked at Nate sideways and nodded.

Over coffee and a short brandy, Gable told the story. Forsyth was considered one of the shit-hot Chiefs of Station in the Service. Throughout his twenty-five-year career, Forsyth came up the ranks with a brilliant record. As a young officer he recruited the first-ever North Korean reporting asset. Before the Wall came down, he directed a Polish colonel who brought Forsyth the complete war plans for Warsaw Pact Southern Command. A few years later, he recruited the Georgian defense minister, who, in exchange for a Swiss bank account, arranged for a T-80 tank with the new reactive armor to be driven at 0300 across the shale beach at Batumi and up the ramp of a heavy landing craft leased by the CIA from the Romanians.

As he moved up, Forsyth was one of the senior managers who had done the work and knew what the Game was about. Case officers loved him. Ambassadors came to him for advice. Seventh-Floor suits at Headquarters trusted him, and at age forty-seven he was rewarded with the plum COS Rome job. Forsyth’s first year in Rome was, as expected, a solid success.

What no one expected was that politically savvy Tom Forsyth would tell the supercilious staff aide of a senator visiting Rome on a congressional delegation to shut up and listen instead of talking during a Station briefing. She had questioned the “condign wisdom” of a controversial and compartmented Rome Station operation. The twenty-three-year-old political science major from Yale with twenty months of experience on the Hill had moreover personally criticized Forsyth’s management of the case by saying she thought the “tradecraft employed was, in a word, subpar.” This elicited from the usually phlegmatic Forsyth a cryptic “Go fuck yourself,” which days later resulted in the Headquarters notification that the senator had complained, that Forsyth’s Rome assignment was curtailed, that he was being relieved for cause.

After the usual righteous letter of reprimand in Forsyth’s file, the Seventh Floor quietly offered Forsyth the COS Helsinki job. The offer was made to demonstrate to Congress that Headquarters sympathized with Forsyth’s reaction to fatuous oversight inflicted on hardworking field operators during Codel shopping junkets camouflaged as fact-finding trips. Offering Forsyth Helsinki was, in addition, an insincere and calculated offer because no one thought Forsyth would accept. The Station was one-sixth the size of Rome’s, in arguably the least important of four somewhat sleepy Scandinavian countries, a post for a junior COS. They expected Forsyth to decline, find a place to park himself, and leave in two years when he became eligible to retire.

“By accepting the assignment he basically told the Seventh Floor to go fuck themselves,” said Gable. “A half year later he got me as his deputy, and yesterday you arrive. Not that you’re a fuckup.” Gable laughed. “You’re just known as one.”

Gable saw Nate’s face, the faraway stare. Okay, he told himself, this kid has a worm in his guts. He’d seen it before, the talented case officer too fucking afeared for his rep and future to be able to relax and let it flow. That whey-faced Gondorf had rattled the kid, should be ashamed of himself, and now he and Forsyth had to get Nash thinking straight. He made a mental note to talk to the COS. The last thing Station needed was a c/o who didn’t know the right time to pull the recruitment trigger.

TARIK’S ADANA KEBAB

Purée red bell and hot peppers with salt and olive oil. Add purée to ground lamb, chopped onion, garlic and parsley, finely cubed butter, coriander, cumin, paprika, olive oil, salt, and pepper. Knead and shape into flat kebabs; grill until almost charred. Serve with grilled pide bread and thinly sliced purple onions sprinkled with lemon and sumac.

8

The white-and-blue Voskhod hydrofoil settled into the water and approached the dock in a trailing cloud of blue diesel smoke. Carrying a small suitcase, Dominika stepped onto the steep pontoon ramp on the edge of the tarry mudflats and walked up to a bus waiting on the gravel road above the river. Eleven young people—seven women and four men—trudged up the pier behind her. They were all silent and tired and put their bags down in front of the open baggage compartment of the bus. No one spoke, they didn’t glance at one another. Dominika turned and looked out over the wide Volga River, pine trees lining both sides down to the shoreline. The air was humid and the river smelled of diesel fuel. Three kilometers north, around a bend in the river, the steeples and minarets around the Kazan Kremlin could just be seen in the morning haze.

Dominika knew it was Kazan because they had driven through the city from the airfield, past all the highway signs. That meant they were in Tatarstan, still in European Russia. At midnight, they had flown seven hundred kilometers from Moscow to a darkened military airfield. Unlit signs had read BORISOGLEBSKOYE AERODROME and KAZAN STATE AIRCRAFT PLANT. They had silently boarded a bus, the star-cracked windows covered by stained gray curtains. They drove through quiet predawn streets to a waterfront pier, where they boarded the wallowing hydrofoil as the sun was coming up over the city.

They waited wordlessly for an hour in the aircraft-style seats of the hydrofoil in stifling air. The arrhythmic rocking of the hull, the slopping water against the pier, and the creaking of the frayed nylon lines straining against the bollards made her queasy, then sleepy. Apart from the driver of the bus and a man on the bridge of the vessel, they had seen no one. Dominika watched the sunlight spread on the water and counted the seabirds.

Eventually a gray Lada pulled up to the gangplank and a man and woman got out, carrying two flat cardboard boxes. They boarded the boat, placed the boxes on the counter at the front of the cabin, and opened the flaps. “Come and help yourselves,” said the woman, and sat down in a front-row seat with her back to the passengers. They rose slowly and made their way to the front. They had not eaten since breakfast the day before. One box was full of fresh-baked bulochki, sweet buns with raisins, the other filled with waxed containers of warm orangeade. The man watched the passengers return to their seats, then went out and spoke to the man on the bridge. The vessel’s engines started with a rumble, and a shudder went through the seats. The aluminum gangway banged onto the pier and the lines were cast off.

The hydrofoil was on plane, up on its foils, and the whole ship trembled as it sped downriver. The seat in front of her vibrated, the cabin headliner grommets buzzed, the metal ashtray inserts chattered in the armrests. Fighting down nausea, Dominika focused on the fabric of the grimy headrest in front of her. Courtesan College. She was flying down the Volga toward a colossal indignity.

Now they were on the bus, the nameless woman sitting in the front seat. They swayed through a sun-dappled pine forest, finally stopping at a concrete slab wall. The sun caught the broken glass mortared along the top. The bus sounded its horn, then squeezed through the gate and up a sweeping drive and stopped in front of a two-story neoclassical mansion with a mansard roof of spalling slate. It was absolutely quiet in the woods, without a breath of a breeze, and there was no movement from within the mansion.

Deep breath. Come on, snap out of it. This disgusting school was another obstacle, more sacrifice, another test of her loyalty. She stood in the piney woods in front of the mustard-colored mansion and waited. She had arrived at Sparrow School.

After talking with her uncle, Dominika had thought hard about telling them all to go to hell. She contemplated taking her mother back to Strelna on the shores of the Nevskaya Guba, near Petersburg. She could find work as a teacher or a gym coach. With luck and time she might find employment at the Vaganova Academy, back into ballet. But no, she decided she was not going to run away. She would do this, whatever it took. They were not going to shoot her. This was about physical love, it would not matter what they made her do, they could not defeat her spirit.

And even as she revolted against the thought, Dominika’s secret self, the humming servo of her body, wondered whether the grimy catechisms resident in the ocher building before her would in any small way fulfill her. She hated the thought of Sparrow School and was abashed at having been sent here, but she privately was expectant, watchful.

“Leave your bags in the hallway and follow me,” said the woman, who had preceded them up the front steps and through the towering front doors of weathered wood. They gathered in an auditorium. Judging by the bookshelves, it had formerly been a library that had been converted to a lecture hall with a raised wooden platform and dais and several rows of creaking wooden seats at one end of the room. The woman, dressed in a shapeless black suit, walked among them and passed out envelopes by hand. “Inside you will find your room assignments,” she said, “and the names you will use during your training. Use only these names. You will not relate any personal information about yourselves to other students. Any infraction will result in immediate dismissal.” In her early fifties, the administrator had upswept gray hair, a square face, and a straight nose. She looked like the woman on the stamps, Tereshkova, the first woman in space. Her words came out in gouts of yellow.

“You have been chosen for specialized training,” said the matron. “It is a great honor. The nature of the training may seem alien and strange to some of you. Concentrate on the lessons and the exercises. Nothing else is important.” Her voice echoed in the high-ceilinged hall. “Now go upstairs and find your rooms. Dinner is at six in the dining room across the hall. Instruction will begin here this evening at seven o’clock. Go now. Dismiss.”

In the upper hallway Dominika counted twelve rooms, six either side, numbers in cracked-enamel lozenges screwed into the wood. Between the bedroom doors along the hallway were other plain doors without knobs or handles. These could be opened only by use of a key. Her room was painted light green and was spare but comfortable, with a single bed, standing closet, table, and chair. There was a faint but constant odor of disinfectant, on the bedspread, in the closet, in the stack of sheets on the shelf. The room had a curtained-off toilet (above which hung a hand shower) and a rust-stained sink. Above the writing table was a large mirror, too large, incongruous in the barracks-style room. Dominika put her cheek flat against the mirror and looked at the surface in glancing light, like in training. The silver smokiness of a two-way mirror. Welcome to Sparrow School.

Dusk, and the night sky not visible through the pine tops. The house was dimly lit; there were no clocks in the mansion, anywhere. No telephone rang. The hallways and staircases and ground-floor rooms were silent; the night invaded the house. The walls were bare, held none of the daguerreotype official portraits of Lenin or Marx, though moldy outlines where portraits once hung were still visible on the panels. What Tatar noble family had lived here before the Revolution? Did resplendent parties ride and hunt in these pines? Did they hear the whistle of the Moscow steam packet from the river? What Soviet instinct had put the school this far away from Moscow?

She looked around the dining table at the eleven other “students” silently spooning tokmach, a thick noodle soup that had been ladled into their bowls from a colossal blue-and-white porcelain tureen by a wordless waiter. A plate of boiled meat followed. The women and three of the men were all in their twenties; the fourth man seemed even younger, in his teens, thin and pale. Were any of them also SVR-trained? Dominika turned to the woman on her left and smiled. “My name is Katia,” she said, using her training alias.

The woman smiled back. “I am Anya.” She was slight and blond, with a wide mouth and high cheekbones lightly dusted by freckles. She looked like an elegant milkmaid with pale blue eyes. Her halting words were cornflower-blue, innocence and artlessness. Others shyly recited their aliases. After dinner they filed quietly into the library.

It was absolutely quiet in the room, then the lights dimmed. Welcome to Sparrow School instruction. A film started, stark black-and-white images, brutal, feral, sawtoothed, it burst onto a screen at the front of the room with straining faces, clasping bodies, organs shafting endlessly, everywhere, now in such close focus to become gynecological, unrecognizable, unworldly. The sound started at full volume and Dominika saw the heads of her classmates jerk back at the sudden assault of sound and sight. The air was filled with spinning color for her; she knew the signs of overload when the bleeding sequence red-violet-blue-green-yellow began. She had no control and closed her eyes to escape the onslaught. Then a speaker popped and the sound suddenly went down to barely audible, so that the woman on the screen seemed as if she were whispering, even as her hair stuck to the side of her face and her body was jolted endlessly by an off-screen partner.

The light flickered on the ceiling beams twenty feet above her head. Could she last here for the duration? What would they expect her to do? What would they do if she got up and walked out of the room? Would she be dismissed from the Service? The hell with them. They wanted a Sparrow, they would get a Sparrow. No one knew she could see the colors. Mikhail had said she was the best student he ever had in seeing people. She would stay. She would learn.

She told herself this wasn’t love. This school, this mansion secluded behind walls topped with broken glass, was an engine of the State that institutionalized and dehumanized love. It didn’t count, it was physical sex, it was training, like ballet school. In the flickering light in the musty library Dominika told herself she was going to go through with this, to spite these vnebrachnyi rebyonoki, these bastards.

The lights came on and the students sat red-faced and embarrassed. Anya sniffled and wiped her eyes with the back of her fist. The matron addressed the students in a flat, hard voice. “You have had a long journey. Return to your rooms and get some rest. Instruction resumes tomorrow morning at oh-seven-hundred. Dismiss.” Nothing in her manner would have even remotely indicated that they had been watching a film of people engaged in coitus for the last ninety minutes. They filed out and up the grand staircase with the massive wooden banisters. Anya nodded good night before closing her door. Dominika wondered whether Anya or the others knew that tonight the as-yet-unseen staff of the Kon Institute, stuffed into the cabinets de voyeur between rooms, would be watching them undressing, bathing, and sleeping.

Dominika stood in front of the mirror, ran the long-handled brush through her hair, the only familiar token she had brought from home, and she looked at it in her hand, as if it could mock her. She stood and unbuttoned her blouse. She slipped the blouse on a bent wire hanger and nonchalantly hooked it on the frame of the mirror, covering one end of it. She set her little suitcase on the table and opened the lid against the mirror, blocking a further third. She stepped out of her skirt and pirouetted unconsciously to look at the curve of her back and the swell of her bottom in the nylon panties before casually flipping the skirt over the frame of the mirror, covering the last third. They would clear the mirror in the morning, perhaps speak sharply to her about it, but it was worth it tonight. Then she brushed her teeth, got under sheets in a disinfectant bloom of camphor and rose oil, and flipped off the light. She left the hairbrush on the dresser.


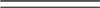


The men were separated from the women and the days spilled into one another and they lost a sense of time. Soporific mornings were devoted to endless lectures on anatomy, physiology, the psychology of the human sexual response. A few new staff appeared. A female doctor droned endlessly about sexual practices in different cultures. Then came the classes on male anatomy, knowing how a man’s body works, how to excite a male. The techniques, positions, movements numbered in the hundreds. They were studied, repeated, memorized, an Upper Volga Kama Sutra. Dominika marveled at this monstrous encyclopedia, at the sticky epiphanies that ruined normality, that forever would rob Dominika of her innocence. Could she ever make love again?

Afternoons were reserved for “practical subjects,” as if they were training to be ice-skaters. They practiced walking, they practiced conversation, they practiced pulling the cork out of a champagne bottle. There were rooms of used clothes, scuffed shoes, sweat-stained lingerie. They dressed up and practiced talking to one another, learned to listen, to show interest, to make compliments and to flatter and, most important, to elicit information during conversation.

A rare afternoon of camaraderie, five of them sitting on the floor of the library in a circle, knees almost touching, laughing, chattering, practicing what they called “sex talk” from what they had heard in the nightly films.

“It’s like this,” said a dark-haired girl with the heavy accent of the Black Sea, and she closed her eyes and murmured in cast-iron English, “Yah, lovers, you are making me to come.” Gales of laughter, and Dominika looked at the blushing faces and wondered how soon some of them would find themselves in their underwear in the Intourist Hotel in Volgograd watching skinny Vietnamese trade reps shuck off their shoes.

“Katia, you try,” said the girl to Dominika. From the first night they had all sensed she was somehow different, somehow special. Beside her, Anya looked at her expectantly.

Without knowing why, perhaps to show them, perhaps to show herself, Dominika half closed her eyes and whispered, “Yes, honey . . . just like that . . . Oh, God,” and pushing the sound up from her belly: “UNNGGGHHH.” Shocked silence, and then the circle of girls roared their approval and applauded. Anya stared, flaxen-haired and wide-eyed and wordless, mindless of the general hilarity of the moment.

Anya of the meadow-flower-blue halo. She was struggling, aghast at the most salacious aspects of training, and clung to Dominika for courage and support. “You have to get used to it,” Dominika told her, but Anya cringed during the nightly films, holding Dominika’s hand tightly as the fuck circus raged on the screen in front of them. The little farm girl isn’t going to make it, Dominika thought. Her color is getting weaker, not stronger.

Then one night, after an impossibly depraved film that had her silently weeping, Anya came to Dominika’s room, eyes red and lips trembling, her cornflower syllables barely visible. She had come to her friend for solace, she was losing her mind. She had told them she was quitting, but they had said something to her—God only knew what—and she could not leave. Dominika pulled her by the hand behind the bathroom curtain. “You have to get through this,” she whispered, shaking Anya gently by the shoulders.

Anya sobbed and threw her arms around Dominika’s neck. She pressed her lips against Dominika’s mouth. The little idiot was trembling and Dominika did not pull away, did not reject her. They were on the floor of the little bathroom. Dominika cradled Anya in her arms, felt her shake. Anya turned her head up for another kiss, and Dominika almost refused, but then relented and kissed her again.

The kiss had an effect on Anya and she reached for Dominika’s hand, pulled it to her body, and slid it beneath her bathrobe onto her breast. Oh, for God’s sake, thought Dominika. She herself felt no passion, but rather sadness for the girl in her arms. Was this the bisexuality they had lectured to them about downstairs? Could they be observed behind the curtain? Was there audio in the room? Was this a serious offense?

Anya held her hand by the wrist and trailed it over her nipple, which swelled under Dominika’s fingertips. The bathrobe fell open and Anya pulled the captured hand lower, between her legs. Perversion? An act of kindness? Something else? Dominika’s unknown ancestral libertine—whoever she was—kept her going, an inexplicable out-of-body state where stopping now was only slightly less possible than going ahead. Dominika’s feather-light fingertips traced minute, perfect circles and Anya melted, her head turned in to Dominika, the line of her neck soft and vulnerable.

Sitting up against the bathroom tiles, Dominika felt Anya’s breath between her own legs and there was no reason now to stop. Her secret self told her to feel her body, and the sensation of Anya’s breathy exhalations radiated up her stomach. Dominika’s head dropped back against the tile and her arm gripped the side of the sink for support. She felt Prababushka’s tortoiseshell brush in her hand and pulled it down. Her great-grandmother’s hairbrush, her mother had brushed her own hair with it, it was her secret companion during the thunderstorms of her girlhood.

Dominika trailed the handle down Anya’s stomach, making the soft amber curve infinitely light, infinitely insistent. Anya held her breath and her eyes fluttered behind tight-shut eyes. Looking at Anya’s face, Dominika positioned the handle and flexed her wrist. Anya’s mouth opened partway, and her eyes showed a sliver of white, like the slack face of a corpse on a slab.

Anya stiffened and began shaking against the slow plunge and drag of tortoiseshell. She turned chin-wet to look up at Dominika and whispered, “Yes baby, just so, you’re cumming me,” and Dominika smiled and watched the little milkmaid thrash about while she put her own secret self back in the hurricane room inside her and closed the door.

After a few minutes, Anya sighed and turned her face up to be kissed again. Enough. “You have to go, quickly, now,” Dominika said. Red-faced, Anya gathered her bathrobe around her, looked at Dominika, and went silently out. Would there be bellowed accusations tomorrow morning? Was there anyone behind the mirror right now? Too tired to care, Dominika got into bed in the darkened room. The brush lay forgotten on the floor under the sink.


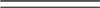


The next morning, in a large downstairs salon, wood-paneled and carpeted with a huge blue-and-ivory Kazakh carpet, the women were ordered to sit in chairs set in a circle in the center of the room. The first student, a slight young brunette with the lilting western accent of Novgorod, was ordered to stand up, undress, and walk around the circle to be critiqued by the others. There was shocked silence. She hesitated but then disrobed. The female doctor and her assistant, both in lab coats, acted as moderators, noting strengths and weaknesses. Finished, the student was ordered to sit in her chair, but to remain naked. The next student was called and the process was repeated. Flushed faces, goose bumps, and bitten lips, the room slowly was filled with incongruous, shivering naked bodies, a pitiful pile of clothes and shoes beneath each chair.

Thank God there were no men present! Anya twisted her hands nervously as her turn inexorably came, and she looked over to Dominika in a panic. Dominika looked away. The doctor snapped at Anya to hurry up when she hesitated to peel off her panties. Now it was her turn, and Dominika ignored her nervousness and stood up when she was called. It was monstrous to be ordered to strip off in the presence of half a dozen strangers, but she forced herself. Anya looked at her intently. Dominika was embarrassed as much by her nudity as by the awed silence in the room when she walked around the circle of chairs. “Best in breed,” whispered the assistant. “Best in show,” corrected the doctor.

The following day a man stood in the circle of chairs and took off a short bathrobe. He was naked underneath and needed to bathe and clean his toenails. The doctor evaluated the pale body for the students, and close-up assessment followed. The next day the man in the bathrobe was back, this time with a short, stocky woman with iodine-red hair and chapped cheeks and elbows. They disrobed and unconcernedly made love on a mattress in the center of the students’ circle of chairs. The doctor pointed out different lovemaking positions; she would order the couple to stop in mid-act to illustrate a relevant point or to demonstrate a physical refinement. The models showed no emotion, neither for themselves nor for their partners, their colors so washed out as to be invisible. It was soulless.

“I cannot look at them,” Anya confessed to Dominika. They had grown into the habit of walking together around the shabby garden of the mansion in the few free minutes after breakfast. “I cannot do this, I simply cannot.”

“Listen, you can become used to anything,” said Dominika. How was this girl ever selected? From what provincial capital had she been picked? Then she wondered to herself, What about you, can you become accustomed to anything after enough time?

The next week was, as Dominika anticipated, a multiplication of indignity. Again the salon and the familiar circle of chairs, but this time men, brusque men in tight suits and bad haircuts, sat in the circle. The female students were told to undress in front of these men, who then proceeded to critique each of the students, pointing out flaws in her figure or complexion or face. They were never identified; their yeasty yellow bubbles combined to tarnish the atmosphere of the entire room.

Anya covered her tear-streaked face with her hands until the doctor told her to stop being a silly cow and to take her hands away this instant. Feeling as if she were in a dream, Dominika left her body, closed her mind, and endured the stares of a man with a terribly pocked face. The color coming from inside him made his eyes yellow, like a civet in an alley. She stared back at him without blinking as his eyes wandered over her. “Not enough meat on her,” he said aloud to nobody in particular. “And her nipples are too small.” Two other men nodded in agreement. Dominika stared them all down until they looked away or got busy lighting their cigarettes.

Dominika was surprised to note that she was beginning to go numb. Numb to nakedness, numb to lewd commentary, numb to strangers’ eyes looking at her breasts or her sex or her buttocks. They can do what they like, she told herself, but I won’t let them look me in the eyes. Other students reacted in their own ways. One silly little idiot from Smolensk with the lilt of southern Russian dialect vamped and hip-shot her way through the sessions. Anya never seemed to get over her shame. The defining smell of disinfectant in the mansion now was overlaid with the pungency of their bodies, musk and sweat and rosewater and brown soap. And after lights out, the sweating staff sat in the cabinets and took notes and made sure the cameras were not blocked.

Anya knocked softly at her door late one night, and Dominika opened it a crack and told her to go away. “I can’t help you anymore,” she said, and Anya turned and disappeared down the darkened hallway. It isn’t my problem, thought Dominika. It’s enough that I’m fighting for my own sanity.

Then the bus came with the military cadets, the ones who had scored at the top of their class. The women waited for them in their rooms, and sat on the beds and watched the skinny, bruised bodies as the boys ripped off their tunic shirts and boots and trousers, and held on tight as they rutted like stoats until time was up. The cadets left without looking back at the women, and the bus swayed as it went out through the gate into the pine forest.

The next morning in the curtained, darkened library the projector began, but instead of the usual film, they saw their classmate in room number five on the single bed with a skinny, shaved-headed cadet from the day before. The women could barely look at the screen. This was shame, this was indignity, seeing yourself with legs hooked around a pimply back, hands formed into claws on bony shoulders. The doctor would freeze-frame the films to add commentary, suggest improvements. Worse, they all now guessed that the films would come in order—rooms five, six, seven, and so on. Anya’s head was down, her face in her hands. She was in room eleven and would have to endure not only the films, but also the wait. She ran from the room weeping as her segment ended. The doctor let her flee. She prattled on about what had been done wrong, how it could be improved.

Dominika was in room number twelve, at the end of the hall. The filmed segment of the interlude with her cadet therefore was the last. Disembodied, she watched herself, surprised at her slack face, how mechanically she had grasped the young man and guided him, how she had pulled his ear to get him off when he collapsed on top of her. Her head was spinning, yet she felt no shame, no embarrassment. She looked at the images on the screen without feeling and kept telling herself that she was a member of the Sluzhba Vneshney Razvedki, the Foreign Intelligence Service of the Russian Federation.

The next morning Anya did not come down to breakfast, and two girls found her in her room. They had to push the door open with their shoulders. She had knotted panty hose around her neck, wrapped the end around a coat hook on the back of the door, and simply had drawn her legs up and strangled herself. She had had the strength to keep her feet off the floor until she blacked out. The weight of her lolling body had kept the noose tight. In the garden, Dominika heard the screams. She raced upstairs, pushed the others aside, and lifted Anya off the hook and laid her on the floor. She felt guilt and anger. What did the little twit expect from her anyway? How could she have had the courage to choke to death, she thought, but not to lie with a man for thirty minutes?

There barely was a reaction. The bear sniffed at the body, then turned its back. Anya was carried out of the mansion on a canvas stretcher, covered by a blanket, her blond hair sticking out from under. Nothing was mentioned, by anybody. The day’s instruction continued as before.

The course was coming to an end. The six Sparrows watched as the four young men filed back into the dining room. They were fledgling “Ravens” now, trained in a smaller villa down the road, three of them expert in the art of seducing the vulnerable and lonely women targeted by the SVR—the minister’s spinster secretary, the ambassador’s frustrated wife, the underappreciated female aide of a general. The fourth young man had learned another specialty: befriending the sensitive, fearful men—cipher clerks, military attachés, sometimes senior diplomats—who secretly yearned for male friendship, companionship, love, but who were heart-piercingly vulnerable to the threat of exposure. The Ravens loftily declared that they had suffered during their training. Training partners were not readily available, whispered Dmitri; they practiced on unwashed girls from nearby villages, made love to sallow slatterns bused from factories in Kazan. Dominika did not ask about the fourth boy, how and with whom he had practiced. “But now we’re trained to excel in love,” said Dmitri. “We are experts.” He opened his arms and stared at them through his eyelashes.

The women looked back at him wordlessly. Dominika saw the women’s faces were closed down, saw the skepticism and fatalism and mistrust. These were like the vacant faces of the hookers on Tverskaya Ulitsa in Moscow. The fruits of Sparrow School, thought Dominika. Anya’s empty place at the table was not the only cost.

They departed for the airport at midnight, carrying their cheap cardboard suitcases, leaving the blacked-out mansion without a look back. Whore School was closed until the next group arrived. The pinewoods were black, silent. The plane circled the smokestacks of Kazan and flew west over the invisible landscape. In another hour they were over the lights of Nizhniy Novgorod, bisected by the black ribbon of the Volga. Then came the gradual descent toward the glow of sleepless Moscow. She would never see any of the other trainees again.

She was to report to the Center the next morning, to the Fifth Department, to start her career as a junior intelligence officer. She thought about Simyonov, chief of the Fifth, and about the other officers she would meet, how they would look at her, what they would say. Well, she thought, the trained courtesan is back from the steppes, and she intended to inhabit their world.

The living room was dark when she tiptoed into the apartment in the hours before dawn, but her mother appeared in the hallway, dressed in a bathrobe. “I heard your steps,” she said, and Dominika knew she meant her uneven tread in the stairwell. Dominika hugged her, then took her mother’s hand and kissed it—with lips that had been trained to ruin a man—an act of expiation.

SPARROW SCHOOL TOKMACH SOUP

Boil coarsely chopped potato, thinly sliced onions, and carrots in beef broth until soft. Add thin noodles and cook until done. Put boiled beef in bottom of bowl and pour broth and vegetables over.

9

Dominika reported to the Fifth the next morning, still exhausted by the flight from Kazan. Walking down the long headquarters corridor with light green walls, she went to Simyonov’s office to report for duty but was told the colonel was out and to come back later. Instead they sent her to Personnel, then to Registry, then to Records.

She walked around a corner in the hallway and came upon Simyonov himself, talking to a white-haired man in a dark gray suit. She noticed the man’s bushy white eyebrows and kindly smile. His liquid brown eyes narrowed as Simyonov made a brief introduction: General Korchnoi, chief of the Americas Department, Corporal Egorova. She vaguely knew the name, was aware of his seniority. Compared to the pale aura around Simyonov’s head, Korchnoi was bathed in a flaming mantle of color, as bright as Dominika had seen in anyone. Purple velvet, deep and rich.

“The corporal just returned from the course at Kazan,” said Simyonov with a smirk. Everyone in the Service knew what that meant. Dominika felt the blood rush to her cheeks. “And she is assisting in the approach to the diplomat, the case I was telling you about, General.”

“More than just assist,” said Dominika, looking at Simyonov, then at Korchnoi. “I graduated from the Forest in the last class.” She ignored Sparrow School, cursing Simyonov under her breath. She knew what Simyonov was doing, but she sensed nothing from the older man. Hard to read.

“I heard about your record at the Academy, Corporal,” said the general enigmatically. “I am glad to meet you.” Korchnoi shook her hand with a dry, firm grasp. Simyonov looked on, smiling, thinking this would be the first of many senior officers who would try to dive down the front of her blouse. She’d be working in the front office of some general (and on his leather couch) within six months. Surprised and flattered, Dominika shook his hand, thanked the general, and continued down the corridor. The men’s eyes followed her.

“More steam than a banya in Yakutsk,” whispered Simyonov when Dominika had walked around the corner. “You know she’s the niece of the deputy?”

Korchnoi nodded.

“Niece or not, she’s going to be a pain in the ass,” muttered Simyonov. Korchnoi said nothing. “She wants to be an operator. But look at her, she’s built to be a vorobey. That’s why Egorov sent her to Kazan.”

“And the Frenchman?” asked Korchnoi.

Another snort. “Polovaya zapadnya. A straight honey trap. A matter of weeks. He’s a commercial type, we squeeze him dry, and it’s done.” He nodded his head down the hallway. “She wants to read the file, to get involved. The only thing she’s going to get involved in is what’s between the Frenchman’s legs.”

Korchnoi smiled. “Good luck, Colonel,” he said, shaking hands.

“Thank you, General,” said Simyonov.


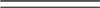


They had pointed her to a corner of the French Section of the Fifth Department. She had stared at the windowless angle of the walls as they met at the corner of the chipped desk, which was bare save for a cracked wooden in-tray. Two fat file folders were thrown rudely on her desk. Simyonov had finally released them to her to get her off his back. The dull blue covers with black diagonal stripes were dog-eared, spines fuzzy from sweaty hands. Osobaya papka. Her first operational file. She opened the cover and drank in the words, the colors.

The target was Simon Delon, forty-eight, first secretary in the Commercial Section of the Embassy of France in Moscow. Delon was married but his wife remained in Paris. He traveled infrequently to France for conjugal visits. As a geographical bachelor in Moscow, Delon had been noticed by the FSB almost immediately. They assigned a single watcher at first, but as time passed and interest in him peaked, he was covered in FSB ticks. They spent a lot of time with their krolik, their rabbit. A twelve-man team took him to work and put him to bed. Photos spilled out of an envelope stuck between the pages of the file. Delon walking alone along the river, alone watching the skaters at the Dynamo rink, alone eating at a restaurant table.

Dominika smoothed the creased blue surveillance flimsies. They had used the mirror to watch a long-legged hooker slide her hand up Delon’s leg in a little escort bar off Krymskiy Val Ulitsa. Subject uncomfortable, nervous, refused (unable?) to pick up hooker, read the entry. Poor devil, he didn’t belong there, thought Dominika.

Technical annex: An audio implant in a living-room electrical outlet produced hours of tape: 2036:29, Sounds of dish in the sink. 2212:34, music softly played. 2301:47, retired for night.

They had spiked his phone from the central exchange to cover the weekly call to his wife in Paris. Dominika read the transcripts in French. Madame Delon was impatient and dismissive on one end, Delon small and silent on the other. A sexless, joyless marriage with an impatient woman, an unknown transcriber had written in the margin.

Sometime during the assessment process, the SVR had elbowed its way in and declared primacy over the FSB—it was a foreign case, not domestic. The second volume of the file began with an operational assessment, written in the abbreviated style of the semiliterate Soviet, the kind of writing they had mocked at the Academy. Subject potential for operational exploitation excellent. No identifiable vices. Sexually unfulfilled. Access to restricted information good. Assessed to be retiring and unaggressive. Susceptible to blackmail given lucrative marriage. And so on.

Dominika sat back and looked at the pages and thought about her Academy training. It was clear that this was a small case, with a small target, and with a small payout. Delon might be a lonely little man, vulnerable perhaps, but his access in his embassy was low-level. The Fifth didn’t have anything better than this, this navoz, this manure? Simyonov was building this up, inflating the case, it was clear. She had gone through the Academy, had endured whore school, only to find herself now among a different kind of prostitute? Was the entire Service like this?

She took the elevator to the cafeteria, took an apple, and went out onto the terrace in the sunshine. She sat away from the bench seats, on a low wall along a hedge, flicked off her shoes, closed her eyes, and felt the warmth of the bricks on her feet.

“May I join you?” said a voice, startling her. She opened her eyes and saw the tidy figure of General Korchnoi of the Americas Department standing before her. His suit coat was buttoned and he stood with his feet together, as if he were a maître d’. The sunlight made his purple halo deeper in color, almost with a discernible texture. Dominika jerked upright, fumbling with her flats, trying to get them back on. “Leave your shoes off, Corporal,” Korchnoi said with a laugh. “I wish I could take mine off and find a fish pond in which to dangle them.”

Dominika laughed. “Why don’t you? It feels wonderful.” Korchnoi looked at the blue eyes and the chestnut hair and the guileless face. What sort of provisional officer would make that outrageous suggestion to a general-grade officer? What kind of junior graduate would have the nerve? Then the head of the SVR Directorate responsible for all offensive intelligence operations in the Northern Hemisphere leaned down and pulled off his shoes and socks. They sat in the sun together.


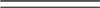


“How is your work, Corporal?” asked Korchnoi, looking at the trees around the terrace.

“It is my first week. I have a desk and an in-box, and I’m reading the file.”

“Your first case file. How do you like it?”

“It’s interesting,” Dominika said, thinking about the general shabbiness of the file, the dubious conclusions, the spurious recommendations.

“You don’t sound entirely enthusiastic,” said Korchnoi.

“Oh, no, I am,” said Dominika.

“But . . . ?” said Korchnoi, turning toward her slightly. The sunlight cast a spidery shadow on his bushy eyebrows.

“I think I need time to become familiar with operational files,” said Dominika.

“Meaning what?” said Korchnoi. His manner was gentle, reassuring. Dominika felt comfortable speaking to him.

“After I read the file, I did not agree with the conclusion. I don’t see how they arrived at it.”

“What part don’t you agree with?”

“They are looking at a low-level target,” she said, consciously not giving too many details, mindful of security. “He is lonely, vulnerable, but I don’t think he is worth the effort. At the Forest they spoke often about squandering operational resources, about not chasing unprofitable targets.”

“There was a time,” said Korchnoi, testing her, “when women were excluded from the Academy. There was a time when it would have been unthinkable for a junior officer to read into an ongoing operation, much less comment on it.” He looked up at the midday sun and squinted. Royal purple.

“I’m sorry, General,” Dominika said mildly. She knew, was certain, that he was not angry. “It was not my intention to criticize, or to speak inappropriately.” She looked at him squinting up at the sun, quiet, waiting. She had an instinct to speak her mind to this man. “Forgive me, General, I meant only to comment that I think the case is weak. I cannot see how they arrived at the operational conclusions. I know I have scant experience, but anyone could see this.”

Korchnoi turned to look at Dominika—she was serene and confident. He chuckled. “You are supposed to read with a critical eye. And those idiots at the Academy are right. We have to be more efficient. The old days are over. We have difficulty forgetting that.”

“I did not mean to be disrespectful,” said Dominika. “I want to do a good job.”

“And you are right.” Korchnoi smiled. “Marshal your facts, order your arguments, and speak up. There will be disapproval, but keep on. I wish you luck.” He rose from the wall, holding his shoes and socks. “By the way, Corporal, what is the name of the target?” He saw her hesitate. “Just curious.” Dominika in a flash knew this was not the time to be a novice. If he didn’t already know the name, he could find out in ten seconds.

“Delon,” she said. “French Embassy.”

“Thank you.” And he turned, still holding his shoes and socks, and walked away down the path.


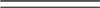


She expected nothing less, but the difficulties began during the daily planning sessions. Holding the two-volume file in her arms, Dominika entered the conference room and sat at the end of a faded table with three officers, all draped in browns and grays, from the Fifth Department (responsible for France, Benelux, Southern Europe, and Romania). She sensed the lack of energy in the room. There was no emotional output from these men, no imagination, no passion.

An enormous map of Eurasia covered an entire wall, several telephones were on a dusty credenza at the end of the room. The men stopped talking when she entered. Rumors were already circulating about the beautiful Sparrow School graduate. Dominika returned their stares, barely registering the hard faces, the question-mark smirks. Browns, grays, dingy colors from dingy minds. Cigarette butts filled the cheap aluminum ashtrays in the center of the table.

“Are there any preliminary comments?” asked Simyonov at the far end of the table. He was as expressionless and uninterested as he had been when Dominika first met him. He looked at the three faces around the table. No one spoke. He turned toward Dominika, daring her to speak. She took a breath.

“With the colonel’s permission, I would like to discuss the target’s access,” Dominika said. She could hear her heartbeat.

“We have assessed his access,” said Simyonov. His tone implied that Dominika was not to concern herself with the intricacies of the operation. “He is a worthwhile target. What is left now is to determine an approach,” he said, looking at the officer seated beside him.

“I’m afraid that’s not entirely correct,” said Dominika. Heads came up to look at her. What was this? An attitude? From an Academy graduate? From a Sparrow? Eyes swiveled toward Simyonov for his reaction. This was going to be good.

Simyonov slouched over the table, hands in front of him. Today he radiated a faint yellow glow. This man was not going to stand for any contradictions. His eyes were red and watery, his gray hair lay slack on his head.

“You are here, comrade,” he said, “to assist in the approach to the Frenchman. Matters of access, handling, and production will be the responsibility of the officers of this department.” He leaned a little farther forward and stared at Dominika. Heads swiveled back in her direction. Surely that would be the end of the discussion.

Dominika kept her hands clasped firmly on the file folders in front of her to keep them from trembling. “I’m sorry to contradict you, comrade,” said Dominika, echoing his word, an anachronism. “But I was assigned to participate in this operation as an operations officer. I look forward to being included in all phases of the case.”

“An operations officer, you say?” said Simyonov. “A graduate of the Forest?”

“Yes,” said Dominika.

“When did you graduate?” he asked.

“The most recent class,” said Dominika.

“And since then?” Simyonov looked around the table expectantly.

“Specialized training.”

“What sort of specialized training?” asked Simyonov quietly.

She had prepared for this. Simyonov knew very well where she had been. He was trying to humiliate her. “I audited the basic course at the Kon Institute,” said Dominika, her lips tight against her teeth. She was not going to back down to these lichinki, these maggots. She cursed Uncle Vanya in the same breath.

“Ah, yes, Sparrow School,” said Simyonov. “And that, precisely, is why you are here. To participate in the entrapment of the target, Delon.” One of the men at the table nearly, but not quite, stifled a smirk.

“I’m sorry, Colonel,” said Dominika, “I was assigned to this department as a full member of the team.”

“I see,” he said. “Have you read Delon’s papka?”

“Both volumes,” said Dominika.

“Admirable,” he said. “What preliminary observations do you have about the case and its merits?” Smoke drifted to the ceiling as the room fell silent. Dominika looked at the faces appraising her.

She swallowed. “The issue of his access is critical. The target, Delon, in his capacity as a midlevel commercial officer, does not have access to classified material sufficient to justify a politically delicate chernota.”

“And what do you know of blackmail?” Simyonov said evenly, slightly amused. “Just out of the Academy and all?”

“Delon himself is not worth the effort,” repeated Dominika.

“There are a number of analysts in Line R who would disagree with you,” said Simyonov, his tone hardening. “Delon has access to French and EU commercial data. Budget figures. Programs. Investment strategies, energy policies. You would throw this information away?”

Dominika shook her head. “Delon knows nothing that one of our low-grade assets in any of a half dozen French commercial or trade ministries in Paris could not provide directly. Surely that avenue would be a more efficient way to service general requirements?”

Simyonov, face hardening, sat back in his chair. “You apparently learned quite a lot at the Academy. So, you would propose that the department not validate the operation? That we disengage and do nothing against the target, Delon?”

“I say only that the potential risk of compromising a Western diplomat in Moscow is not justified by his low potential as a source.”

“Go back and read the file again, Corporal,” said Simyonov. “And come back when you have something constructive to add.” They all stared at Dominika as she rose from the table, collected the file, and walked the long length of the room to the door. She kept her back straight and focused on the door handle. She closed the door to muffled murmurs and chuckles.

The next morning Dominika arrived at her empty desk to find a plain white envelope in her spavined in-box. She carefully slit it open with a thumbnail and unfolded the single sheet of paper. Written in purple ink in a classic script was a single line:

Delon has a daughter. Follow your instincts. K.


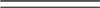


The next day they were back around the table piled high with photographs and surveillance reports. The ashtrays were overflowing. Dominika walked to her place at the end of the conference table. The men ignored her. They were reviewing Delon’s profile, a smoke-polluted exercise conducted with disinterest and one eye on the wall clock. There were no primary colors from any of them. They walked through his habits and patterns, as described by the teams, arguing about places where they could engineer contact. Bored as usual, Simyonov looked up at Dominika. “Well, Corporal, do you have any ideas about contact points? Assuming you have reconsidered your earlier objections to the operation.”

Dominika kept her voice steady. “I have reread the file, Colonel,” she said, “and I still believe this man is not a valid target.” Heads around the table did not come up this time; the men kept their eyes on the papers in front of them. This vorobey was not long for the Fifth, they thought, possibly not long for the Service.

“Still you take this line? How interesting,” said Simyonov. “So we drop him, is that your recommendation?”

“I said no such thing,” said Dominika. “I believe we should indeed pursue him as a target, exploiting his lonely solitude.” She flipped open the cover of the file in front of her. “But the ultimate target, the end goal of the operation, should not be Delon himself.”

“What nonsense are you talking?” said Simyonov.

“It’s already in the file. I completed a bit of extra research,” said Dominika.

Simyonov looked around the table, then back at Dominika. “The case has been thoroughly researched already—”

“And discovered that Monsieur Delon has a daughter,” interrupted Dominika.

“And a wife in Paris, yes, we know all that!”

“And the daughter works in the French Ministry of Defense.”

“Unlikely,” fumed Simyonov. “The entire family was traced. The Paris rezidentura checked all local records.”

“Then it appears they missed something. She is twenty-five years old, unmarried, lives with her mother. Her name is Cécile,” said Dominika.

“This is preposterous,” said Simyonov.

“She was mentioned only once in the transcripts. I checked the foreign directories in Line R’s library,” said Dominika, flipping more pages in the file. “Cécile Denise Delon is listed in the Rue Saint-Dominique registry. That means the central registry at the Defense Ministry.” Dominika looked around the table at the faces staring at her. “That suggests, as far as I could determine, that she has access to classified defense bulletins distributed daily to the government. She is one of the custodians of planning documents for the French military. She likely handles the dissemination and storage of a wide variety of French military budget, readiness, and manpower reports.”

“Conjecture, at this point,” said Simyonov.

“We don’t know where the French store their nuclear secrets, but I wouldn’t be surprised—”

“There’s no need for idle speculation,” said Simyonov. The yellow fog around his head was growing, and getting darker too. Dominika knew that he was frustrated, angry, calculating, and she knew that her defiance and insubordination were already more than enough to have her cashiered from the Service.

The room was deathly still. Simyonov’s antediluvian Soviet instincts were alerted; the bureaucrat in him calculated. His thoughts in an instant proceeded in the nature of the traditional KGB functionary: This little tsarevna with the big last name is making me look lacking and stupid. How can I profit in the end from her work? If this maneken is correct, the rewards could be huge, but so are the risks. An operation targeting the French Ministry of Defense would need to be approved all the way to the top.

“If this is true,” he said stingily, “there could be an added benefit.” He spoke as if he had known all along. He flicked ash into the ashtray.

She could read his oily, humid mind. “I agree with you, Colonel. It’s Delon’s real potential, it’s what makes him worth pursuing, what makes it worth the risk to recruit him.”

Simyonov shook his head. “The daughter is in Paris, twenty-five hundred kilometers away.”

“Not so far, I think,” said Dominika, smiling. “We will see.” Simyonov was unsettled by that smile. “Of course, we’ll have to develop a more detailed profile about the relationship between father and daughter.”

“Of course, thank you, Corporal,” Simyonov said. A few more minutes of this and she would be taking over the Fifth Department. All right, he thought, she could do the preparatory work, as much as she liked. As the operation proceeded he’d ensure she’d be on her back with her legs in the air with the cameras rolling, and that would take care of that.

“Very well, Corporal, since you uncovered this interesting detail, I want you to draw up your own thoughts about contact with the target Delon,” he said to Dominika.

“With your permission, Colonel, I have already drawn up a plan to engineer first contact,” said Dominika.

“I see . . .”

The Fifth Department officers pushed back in their chairs and crushed their unfinished cigarettes in the ashtrays. Jesus, the gossip about this Sparrow had been limited to blue eyes, how she filled out her regulation skirt, the size of her chest. No one had mentioned anything about her yaitsa, her set of balls. They filed out of the room, leaving Dominika to gather the paper scattered around the table, the new girl left behind to clean up the room. She didn’t mind. She stacked the papers, piled them on top of the dog-eared folders of Delon’s file, and walked out of the conference room, closing the door behind her.


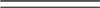


In the Arbat, at number 12 Nikitsky Bulvar, there is a small restaurant called Jean Jacques. It is something like a French brasserie, noisy, smoky, filled with the winey aroma of cassoulets and stews. Tables covered with white tablecloths are jammed nearly edge to edge on a black-and-white tile floor, bentwood chairs tucked in tight. The walls are covered in wine bottles on shelves to the ceiling, the curving bar is lined with stools. Jean Jacques is always crowded with Muscovites. At lunchtime, if one is alone one shares a table with a stranger.

Midday on a rainy Tuesday, Jean Jacques was even more busy than usual. Customers stood inside the front door or under the canopy outside, waiting for single seats to come free. The din was overwhelming, cigarette smoke hung heavy. Waiters scurried between tables, opening bottles and carrying trays. After a fifteen-minute wait, Simon Delon of the French Embassy in Moscow was shown to a two-cover in the corner of the room. A young man sat in the other seat, finishing a deep bowl of Dijonnaise stew thick with vegetables and chunks of meat. He dipped black bread into the gravy. As Delon sat at the table, the young man barely looked up in acknowledgment.

Despite the crowds and the noise, Delon liked the restaurant, it reminded him of Paris. Better still, the Russian lunchtime practice of seating strangers together occasionally provided an opportunity to be seated beside a cute university student or an attractive shopgirl. Sometimes they even smiled at him, as if they were together. At least it would look that way from across the room.

Delon ordered a glass of wine while he looked at the menu. The young man sitting across from him paid his check, wiped his mouth, and reached for his jacket on the back of his chair. Delon looked up to see a stunning dark-haired woman with ice-blue eyes walk toward his table. He held his breath. The woman actually sat down in the seat just vacated by the young man. She wore her hair up, there was a single strand of pearls beneath her collar. Under a light raincoat she was wearing a beige satin shirt over a darker chocolate-colored skirt, with a brown alligator belt. Delon took a ragged pull of his wine as he peeked and saw how the shirt moved over the woman’s body.

She took a small pair of square reading glasses out of an alligator clutch; they perched on the end of her nose as she looked at her menu. She sensed him looking at her and she raised her eyes. He dove back behind his menu in a panic. Another peek, he took in the elegant fingers holding the menu, the curve of her neck, the eyelashes over those X-ray eyes. She looked at him again.

“Izvinite, excuse me, is there something wrong?” said Dominika in Russian. Delon shook himself and gulped self-consciously. He looked to be in his fifties, with strawlike brown hair combed across a big head balanced on a skinny neck perched on narrow, rounded shoulders. Small black eyes, a pointy nose, and pursed mouth topped with a little mustache completed the whiskered-mouse effect. One point of his collar slightly stuck out of his blue-black suit, and the knot of his tie was small and uneven. Dominika resisted the impulse to tuck in his collar and straighten his tie. She knew his birth date, what kind of aspirin was in the cabinet above his bathroom sink, the color of the bedspread on his lonely bed. Well, she thought, he certainly looked like a commercial attaché.

Delon could barely look her in the eye. Dominika sensed the effort he made to speak to her. When he finally did, the words were the palest of blue, not unlike the cornflower blue that had defined Anya at Sparrow School. He took a breath and Dominika waited. She already knew her assessment of him was correct, that her plans for him were beginning.

“I beg your pardon,” said Delon. “I’m sorry, I do not speak Russian. Do you speak English?”

“Yes, of course,” said Dominika in English.

“Et français?” asked Delon.

“Oui,” said Dominika.

“How wonderful. I did not mean to stare,” he stammered in French. “I was just thinking how fortunate you were to be seated. Have you been waiting long?”

“Not too long,” said Dominika, looking around the restaurant and at the front door. “In any case, it looks like the crowd is less.”

“Well, I’m glad you got a seat,” said Delon, running out of things to say.

Dominika nodded and looked back down at the menu. Fortune had nothing to do with Dominika getting that particular seat in the corner of the room. Every customer that day in Jean Jacques was an SVR officer.


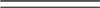


A second chance encounter at Jean Jacques provided the excuse to introduce herself in alias “Nadia” to the owlish little diplomat. Another bump on the sidewalk outside the brasserie days later somehow gave him nerve enough to suggest that they lunch together. After that they tried another restaurant for lunch. Delon was excruciatingly shy, with courtly good manners. He drank in moderation, spoke haltingly about himself, and furtively mopped at his glistening forehead as he watched Dominika absentmindedly brush a strand of hair behind her ear. Over the space of these contacts, Delon’s reticence began fading, while his azure aura was strengthening. It was what she was looking for.

Delon had accepted without suspicion the legend that Nadia was a language teacher at Liden & Denz in Gruzinsky Street. He studiously did not react when she spoke of an estranged husband, a geologist, working out east in another time zone, and he feigned polite disinterest when Dominika vaguely mentioned her small apartment whose only redeeming feature was that she did not share it with anyone. Privately, Delon’s thoughts raced.

Simyonov wanted to move fast, he wanted Dominika to lure the little man into bed and drop the house on him. Dominika resisted, stalled, pushed back to the limits of insubordination. She knew Simyonov intended to use her as a Sparrow, that his vision in the recruitment attempt stopped at a sex-entrapment operation, that he had no appreciation of the promise in the case. She argued forcefully for a period of careful development of Delon, doubly important because of his daughter’s potential as a stupendous source. He would need to be brought along gently. Simyonov controlled his temper as this curvy Academy graduate lectured him, reported progress, and proposed next steps.

It was a classic razrabotka, developmental, over the following weeks. Dominika took Delon through the stages of casual acquaintance to comfortable friendship, watching how he relaxed with her, grew cautiously more familiar, how he hid his growing longing for her. She anticipated his desires, prompted him, hinted how she was becoming fond of him. He could scarcely believe it. The Frenchman was besotted with her, but Dominika knew he was too timid, too fearful to ever push himself at her. There could be no recruitment of him if he felt deceived or compromised, she decided. The recruitment would come based only on friendship, on Delon’s growing infatuation, on his eventual inability to refuse her anything.

They met once a week, then twice a week, then began meeting on the weekends for walks around town, visits to museums. By mutual inclination they were discreet. They both were married, after all. They talked about his family, a carefree childhood in Brittany, his parents. Dominika had to be soft. Delon was a turtle who would jerk his head back under his shell if startled.

In time, Delon spoke haltingly about a loveless marriage. His wife was several years older than he, tall and patrician, she ran things her way. Her family had money, lots of it, and they had married after a brief courtship. Delon told Dominika that his wife had resolved to make something out of him, grand ideas of position and title, abetted by her family’s influence. When his reticence and mildness revealed themselves, his wife had turned her back on the marriage. She preserved appearances, of course, but she did not mind the separation required by his diplomatic assignment. His standing in the Foreign Service depended on her.

Delon adored Cécile, their only child. A photo of her revealed a slight, dark-haired young woman with a willowy smile. She was a lot like Delon, shy and tentative and reserved. With growing familiarity and trust, he finally revealed to Dominika that his daughter worked at the Defense Ministry. He of course was immensely proud of her young career, which had been arranged by his wife and influential father-in-law. Delon spoke with good humor about his hopes for his daughter. A good marriage, a strong career, a comfortable life. That he was willing to talk about Cécile was an important milestone in the development.

Over the rim of a demitasse at a café, Dominika one afternoon asked Delon whether he worried about the future, worried that his wife would leave him, worried that his daughter would meet the wrong man and be trapped in a melancholy life like his own. Delon looked at Dominika—the object of his growing affection—and for the first time should have felt the silken touch of the SVR glove brush against his cheek. A danger signal. But he ignored the frisson, distracted by her blue eyes and tumbled hair and, he was scandalized to admit to himself, the horizontal stripes of the jersey that traced the curve of her breasts. Still they continued their chaste friendship. Outings ended with awkward good-byes, red-faced handshakes, and, once, a hurried, perfumed kiss on the cheek that made his head swim.

“What are you waiting for?” raved Simyonov. “We’re here to trap this robkij francuz, this timorous Frenchie, not to write his biography.”

“This is no time to be stupid,” Dominika said to Simyonov, knowing she was committing a grave offense of discipline. “Let me run this and I will have the Frenchman and his daughter recruited,” she pleaded.

Simyonov seethed, the pulsing yellow fog around him paled, then strengthened, then paled again. He was dissembling, planning treachery, she was sure. She continued crowding him, with her argument but physically as well, standing right up to him. The ensnarement of Delon was nearly complete. He was ready for the hook, she was sure of it. He wanted to start spying for her, he just didn’t know it yet. She remembered a phrase from her old pensioner instructors during the ops course.

“Don’t worry, comrade,” Dominika said. “This svekla, this beet, is almost cooked.” She felt like a veteran repeating it.

“Look,” said Simyonov, pointing his finger at her, “forget the old bullshit jokes and wrap this target up. Stop wasting time.” But even as he scolded, he could sense the nuances Dominika was building into this operation, refinements that he knew were beyond him and were in consequence not at all to his liking.


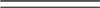


Dominika finally invited Delon to her ostensible apartment in northern Moscow, near the Belarus train terminal and not far from the language school where she claimed to work. It was a small two-room flat with a sitting room, an attached kitchen with curtained lavatory, and a tiny bedroom. The carpet was threadbare, the wallpaper faded and bubbled with age. A battered teapot on a single-element propane stove was too old to whistle. It was small and dingy, but a Moscow apartment not shared with relatives or work colleagues was still an inexpressible luxury.

Another unappreciated—for Delon—aspect was that the walls, ceilings, and fixtures were peppered with lenses and microphones. The apartments on both sides, above, and below were likewise SVR-controlled units. The energy draw from this apartment block alone could have air-started a Tupolev Tu-95. Sometimes, late at night, you could hear the transformers humming in the basement.

“Simon, I need your help,” Dominika said, opening the door to her apartment. A clutch of blue flowers in his hand and a bottle of wine under his arm, Delon immediately looked concerned. This was the third visit to Nadia’s apartment, and previous visits had been limited to chastely listening to tapes, drinking wine, and conversation. Dominika put a little panic into her voice and shook her head. “I accepted a temporary job as an interpreter, French to Russian, for the ITFM trade fair next month. To make a little extra money. What was I thinking? I don’t know any of the vocabulary for industry, energy, commerce—in either language, for that matter.”

Delon smiled. Dominika noted that his blue aura glowed with confidence and affection. They sat down on the little divan in the tiny living room. He knew all about the fair, it was his job. At least six SVR technicians beyond the walls watched and recorded the scene. “Is that all?” said Delon. “In a month I can teach you all the French words you’ll need.” He patted her hand. “Don’t worry.” Dominika leaned toward him, took his face in her hands, and planted a big vaudeville kiss on his lips. She had calculated the time and the nature of the kiss carefully. Showy and girlish as the smooch may have been, it nevertheless was the first time Delon had felt Dominika’s lips. “Don’t worry,” he repeated shakily. He could taste her lipstick. The blue words now were uniformly colored and darker. He had decided.

Dominika had always displayed an interest in his job, his duties as a diplomat, and Delon had grown accustomed to describing his work, pleased to have someone show an interest. Now he could do something for her, and the next evening Delon came to Nadia’s apartment straight from the embassy carrying his briefcase, and produced a twenty-page report from the embassy’s Commercial Section on investment challenges and opportunities in Russia. He read through it with her. The word Confidentiel was printed on the top and bottom of each page.

More sessions, more documents. When Delon could not bring out originals, or copy them, he would take adequate pictures of documents with his cell phone. They worked with his technical dictionaries in French and with hers in Russian. As befitting a language teacher, Dominika was mastering the vocabulary, and he could see with the pride of a tutor that she likewise was mastering the issues regarding international trade and energy. Delon set his jaw with conviction. He would teach her, train her, make her an expert. He loved her, he told himself.

To solve the problem of leaving embassy documents overnight so Dominika could study, Delon himself began making copies for her, a step not so important for the SVR in terms of document copy—the overhead cameras in the ceiling above the table could focus on a single comma—but as an act of commission, an irreversible step beyond the regulations of embassy security. Dominika knew he was hers now. For Delon, the fiction of “vocabulary study” faded into the fiction of “educating Nadia,” which was morphing now into an overwhelming devotion to her, to do whatever she asked. This motivation was stronger than any agent salary she could have offered, stronger than any blackmail threats from a bedroom sting. If he realized he was dealing with Russian intelligence, he never acknowledged it.

Simyonov watched the progress and called another meeting, making a show and raving about moving forward, about bedding the diminutive Frenchman. “Go ahead, you take him to bed,” said Dominika to Simyonov and the men around the table. “Which one of you wants to fuck him?” The room fell silent.

Dominika tried to be a little softer. “Look,” she said. “The next step is supremely delicate.” She had to move Delon first to agree to contact his daughter, then gently to ask her to provide defense secrets. It was like pulling strings to control one puppet that in turn was attached to another puppet. Once his daughter had crossed the line, Delon had to ensure her continued participation. “Once the French defense documents start flowing, the case will be made,” said Dominika.

Simyonov listened sourly and was not convinced. The plan was too complicated. This diletantka was insubordinate. But he resolved to wait a while longer. He was confirmed in his plans after another hallway conversation with General Korchnoi. The veteran senior spy said he absolutely agreed with the need to move forward with the recruitment pitch, and commiserated with Simyonov when he heard about Dominika’s headstrong attitudes. “These young officers,” said Korchnoi. “Tell me more about her.”


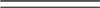


Ironically, it was the timorous Delon who forced the timeline. Sitting next to Dominika on the couch one evening, reviewing another midlevel commercial document, Delon had impulsively reached out and taken her hands in his. He then had leaned toward her and kissed her tenderly. Perhaps the intimacy of working together finally overcame him, perhaps an instinct about being dragged slowly into the funnel web of espionage made him fatalistic. Whatever had awakened him, Dominika kissed him back tenderly while frantically calculating. They were at a critical juncture of the operation. Sleeping with him now, before she could bring the daughter into the plan, could jeopardize the transition. Conversely, it could cement her control over him. Dominika thought about the glistening jowls, the overhanging bellies of the men in the hot little room on the other side of the wall.

As if he had sensed her indecision, Delon’s lips faltered, his eyes popped open. At the least likely moment he was going to stop. The halo around his head was blazing, incandescent. In that instant Dominika knew she must go forward, they would have to become lovers. She would carry him along, help him seduce her.

She registered a little regret at reaching this stage. He was so trusting and sweet—how unlike her romp with Ustinov. And now she had Sparrow training, prompts from which began popping uncontrollably into her brain.

Dominika put her hand behind his head and pressed their lips together more tightly (No. 13, “Unambiguously signal sexual willingness”) and took a trembling breath (No. 4, “Build passionate response by evincing passion”). He pulled away and looked at her with wide eyes. She caressed his cheek and then, staring into his eyes, placed his hand on her breast. He could feel her heart beating and she pressed his hand more hotly against her (No. 55, “Display carnal abandon to authenticate physical arousal”). She shuddered. Delon was still staring, his hand motionless. “Nadia,” he whispered.

Eyes now closed, Dominika brushed her cheek against his and brought her mouth close to his ear (No. 23, “Provide aural prompts to spur desire”). “Simon, baise-moi,” she whispered, and they were up and staggering into the dim little bedroom (which was in truth illuminated brighter than Moscow’s Dynamo soccer stadium but with invisible infrared light), and Dominika stepped out of her skirt, shrugged off her blouse, but kept her low-cut brassiere in place (No. 27, “Employ incongruity of nudity and vestments to whiplash the senses”), and watched Delon hopping ridiculously out of his trousers while she trailed her hands down her thighs (No. 51, “Auto-stimulate to generate pheromones”).

He was like a mating turtledove in bed, fluttering, feathery, weightless as he lay on her body. He nuzzled gently between her breasts; she hardly felt him, but she arched her back, threw out her legs (No. 49, “Generate dynamic tension in the extremities to hasten nerve response”) and focused for an instant on the aperture in the light fixture on the ceiling, but his head was lifting from between her breasts to look at her again, and she met his eyes and he sighed and fluttered more energetically on top of her. Dominika closed her eyes (No. 46, “Block distractions which derail responsiveness”) and called his name again and again and felt a building tremor run through his body, and she helped him (No. 9, “Develop the pubococcygeus muscle”), and he whimpered, “Nadia, je t’aime.”

She ran her fingers along his neck and whispered, “Lyubov’ moja,” my love, and knew what was happening when the door to the bedroom exploded inward and the orange-tinted bulb (better contrast for the digital cameras) in the overhead fixture flooded the room with light and three men in suits crowded into the room. Their shirt collars were wet and their eyes shone like pig eyes in a truffle forest. They had been watching from next door, and the smells of their sweat and day-old shirts and week-old socks filled the room.

The minute the door opened, Dominika sat up in bed and clasped the terrified, shrinking Delon to her like a favorite doll and started screaming in Russian for them to get out. She knew Simyonov was blowing her careful recruitment to smithereens. He could not wait, he had to proceed according to his artless script. It was a blow against her. She was paying for her glib performances around the conference table, her disrespectful interruptions. She remembered trying to talk like one of the old boys: “This beet is almost cooked,” she had said. Well, the old boys were showing her who ran things.

They tore Delon from her, dragged him off the bed, and marched him naked to the living room. They pushed him on the couch and threw him his crumpled trousers. He looked up at the hulking men without comprehension. Dominika continued swearing at them from the bed as she gathered up a sheet to cover herself and get to her feet. She was nearly blind with rage and her body, throat, head felt tight, and her ears were filled with a rushing sound.

She was determined to drive them out of the room and retrieve the situation. Before she could stand, the third man grabbed her by the wrist and pulled her off the bed and into the living room. When Delon saw her being manhandled he made to rise, but the other two men pushed him back down. The man spun Dominika to face him and slapped her across the cheek. “Shalava, suka!” he spat, and threw her to the floor. Staged scenario or not, Dominika looked up at the bastard who had called her a slut and a whore, and measured the distance to his eyes.

Dominika got to her feet and let the sheet fall to the floor. Every eye in the room was transfixed by her body, chest heaving, legs braced. Her foot flashed out in a feint, and the SVR man bent forward to protect himself. Dominika quickly reached out and dug the nails of her thumb and forefinger into the septum between his nostrils, pinched hard, and pulled him toward her, a torture-cell NKVD come-along from the 1930s. Dominika pulled the howling and unresisting thug’s head sharply downward against the little table in the room—littered with French Embassy commercial documents—the corner of which caught him on the cheek, knocking the table and the papers over and dropping the man into a heap on the floor. He didn’t move. From the couch Delon looked at her in disbelief.

The entire sequence had taken less than ten seconds. One of the other SVR men grabbed Dominika and hustled her out of the apartment, frog-marched her down the hall, and shoved her into another room. “Take your hands off me,” she said as the door slammed shut in her face. The man was gone. A voice came from the back of the room.

“An effective performance, Corporal, a strong finish to a discreet intelligence operation.” Dominika turned to see Simyonov sitting on a couch in front of two monitors. One screen showed the apartment, a man bending over the insensate lump on the floor, while the other man stood over Delon, who was still holding his trousers in his hands, his face looking up at him, upturned as if in prayer. The other screen replayed Dominika and Delon in bed. With the sound muted, their lovemaking looked clinical, staged. She ignored it.

Dominika clutched the sheet around her with one hand while fingering her throbbing cheek with the other. “Zhopa! Asshole! We would have gotten it all,” she screamed. Simyonov did not respond. His eyes darted from one monitor to the other. “He would have recruited his own daughter for me,” she raved. Simyonov did not turn to look at her but muttered, “He will do so at any rate.” He pointed a remote and the sound came from the live monitor. The two SVR men were now screaming at Delon, who sat motionless on the couch. Dominika took another barefoot step into the room toward Simyonov, seriously contemplating driving a thumbnail into his eye. “Don’t you know he will not succumb to blackmail? He is not brave enough. Do you really think . . . ?”

Simyonov turned to her as he lit a cigarette. His eyes blazed yellow. “If it doesn’t work, we can log it into your copy book as a failure, then,” he said. “It’s not your decision and it never was,” he said, smiling at her. “And this Service is not your private preserve.” He turned to the silent monitor. Dominika dully watched herself wrap her legs around Delon’s waist.

“What is the purpose of replaying the bedroom film, comrade?” she said to Simyonov. He did not reply but blew cigarette smoke at the ceiling.

“Given the fact that Serov struck you, I will not initiate charges against you for what you did to him.” He pointed at the other monitor and at Serov, still unconscious on the floor. “You have quite a temper, don’t you, Vorobey? It should be an asset to you in your budding career.” He smiled again and nodded at the door to an adjoining room.

“There is a change of clothing in there if you want to get dressed, Corporal. That is, unless you choose to remain naked all night.” Dominika went into the little room and quickly threw on a formless smock and plastic belt, a pair of black tied shoes. The approved look for the last fifty years for the Modern Soviet Woman.


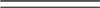


Dominika never saw Delon again. The story came out in segments. An SVR informant working in the clerical pool of the French Embassy reported that Delon requested an appointment with the ambassador the next morning. Delon confessed to an “unreported, intimate relationship with a Russian woman.” The little man had shown quite a lot of courage as he described the number and nature of the commercial documents that he had shared, copied, or otherwise compromised. The DGSE chief in Moscow cabled his headquarters in Paris, as well as the Counterintelligence Division of the DST. There had been knowing shakes of the head. A beautiful woman, quoi faire? What could you do?

The Germans would have found him shuldhaft, culpable, and given him three years. The Americans would have pegged the poor sap a victim of sexpionage and sentenced him to eight years. In Russia the predatel’, the traitor, would have been liquidated. French investigators handed down a stern finding of négligent. Delon was transferred home quickly—out of reach—and consigned to duties without access to classified information for eighteen months. He was near his daughter and back in Paris. His ultimate penance was living again in his wife’s elegant, lofty house in the Sixteenth with only the memories—in the sleepless early mornings—of a dingy little Moscow apartment and a pair of cobalt-blue eyes.

JEAN JACQUES BEEF STEW DIJONNAISE

Season and dust with flour small cubes of beef and brown aggressively. Remove meat. Sauté chopped bacon, diced onion, tomatoes, carrots, potatoes, and thyme until soft. Return meat to pan, cover with beef broth, and simmer until meat is tender. Blend in Dijon mustard, splash of heavy cream; reheat and serve.

10

Vanya Egorov was chain-smoking Gitanes sent to him via SVR couriers by the rezident in Paris. His eyes were tired and it felt as if there were a steel band around his chest. On his red leather blotter lay another FSB surveillance report, the third in as many months. An American diplomat—suspect CIA—had been followed during a twelve-hour SDR two nights ago. There had been multiple teams on the young American, and the number of surveillants deployed had grown through the late afternoon and into the night when it seemed increasingly likely that the Yankee was operational and was headed for a meeting with an asset. The teams had grown excited when it appeared that the young American fool had not detected coverage. That was very rare.

The final number of surveillants topped out at one hundred twenty, the FSB report baldly boasted. Driving snow flurries during the day had grounded spotter aircraft, but ground units followed in multiple layers, switching the eye frequently. Foot assets were salted ahead of the American along likely routes, teams paralleled on the flanks. There had been at least one FSB static surveillant in sixty of Moscow Metro’s one hundred eighty stations, in case the American changed course suddenly. Egorov flipped the last pages of the report impatiently. FSB dolboyoby, those fuckheads.

The American entered Sokolniki Park in northeast Moscow at dusk, walked through the decrepit amusement park, dark and frozen, past the rusted Ferris wheel, and entered the labyrinth of lanes and alleys lined with black, bare trees. He stopped at an empty ornamental fountain and sat on the cement rim in the cold, stupidly contemplating the barren flower beds. Encrypted radio traffic spiked. This was it. A meeting. Keep the night-vision goggles on the Yank, but fan out and lock on to anyone in the vicinity, anyone. A solitary pedestrian, furtive, nervous, moving in the direction of the fountain.

Reading the report, Egorov could imagine FSB men darting from tree to tree, NVGs strapped to their heads, a forest full of green, bug-eyed aliens. A tracking dog was brought up to look for buried drops. The keyed-up Alsatian was used to follow Americans, trained to focus specifically on the scent generated by Dial soap and Sure deodorant—the scent of America.

And they waited. And the American waited. Well beyond the traditional four-minute window. Ten, twenty, thirty minutes. Nothing. The rest of the park was empty. The dog was run back along the American’s foot route but did not alert on anything. No caches, ground spikes, devices, nothing. Radio cars on the outer edges of the park cruised slowly, recording one hundred license plates in the area that would be checked and cross-referenced. Nothing. The American then left the park and, again nontraditionally, proceeded directly home, with no effort to test for coverage. FSB radios went silent.

Egorov flipped the report into his out-box disgustedly. The FSB were congratulating themselves on a “perfect surveillance evolution,” in that the rabbit had no idea he had been stoppered in the bottle. Big deal, thought Egorov, what had they accomplished?


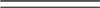


Vanya Egorov did not know it, but the thrashing about of FSB coverage on the American case officer created enough of a stir that MARBLE, headed into Sokolniki Park to attempt a meeting with the American, instead decided to wait and watch from a covered bus stop on Malenkovskaya Ulitsa, several blocks from the entrance to the park. His exceptional street instincts were confirmed when he saw three surveillance radio cars pull abreast of each other a hundred meters from him. The surveillance team leaned against the fenders of their cars, smoked cigarettes, and not-so-furtively passed around a bottle. This was the classic surveillance error on the street, bunching and scuttling together like tarakanki. Cockroaches.

Very well, another reprieve in the life I have chosen, thought MARBLE as he walked away from the neighborhood. How many more did he have left? He thought about what he would write in his burst transmission tonight, and how he had to urgently find a reason to travel abroad. He had to meet Nathaniel again.


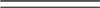


The next morning Line KR Chief Zyuganov sent a classified zapiska to General Egorov, a memo designed to demonstrate Zyuganov’s prescience and command of the situation.

There could be a limited number of explanations for the American officer’s activities. 1. This could have been an exercise to draw, then quantify, FSB surveillance capabilities, including collecting signals intelligence on FSB encrypted frequencies; 2. The American did detect coverage and aborted his meeting plans, leading surveillance into the park to misdirect; 3. The American was oblivious but his agent aborted the meeting for unknown reasons.

This activity by the Americans seems poorly planned and clumsily executed and reflects our continued assessment of the CIA Station Chief Gondorf as a senior officer unsuited for dealing with the intricacies of his grade, the unhappy product of long-time patronage.

Who cares about that polyp? thought Egorov. We have enough dim-witted, vain, pampered bunglers in our own Service.

Vanya knew, was certain, that they had missed again, that the mole was still out there, sweating in his bed at night, betraying Russia, jeopardizing his—Vanya’s—own political and personal future.

Then the day had been shattered by a midafternoon telephone call from the Kremlin, the smooth voice of the president hollow over the encrypted line. President Putin knew about the last night’s surveillance in Sokolniki Park, recited back the various interpretations of what had happened. Vanya mentally filed away the fact that Zyuganov’s zapiska had found its way to that office.

“A counterespionage success against the Americans would not be unwelcome now,” the president had purred into the phone. “In a time of crisis for the Motherland, there is less time for hozjajki, these housewives, to bang pots and pans in protest.” The line went silent but Vanya did not interrupt. He was familiar with the cadences of the president’s speech. “We do not have the luxury of time,” said Putin finally, and the line was disconnected.

Vanya stared into the phone receiver and replaced it on the instrument. Sookin syn. Son of a bitch. He pushed the key on his intercom. “Zyuganov, immediately.” The mole was still out there, but if clandestine meetings in Moscow were not working, third-country meetings outside Russia were the key. And Nash was right next door in Finland. Nash. He pushed his intercom again. “Egorova. My niece. This instant.”

In twenty minutes, Dominika was sitting in front of his desk. CI Chief Zyuganov, his feet not touching the floor, sat on the other side of her. All three buttons of the dwarf’s shapeless black suit were buttoned and he gripped both arms of the chair. His perpetual bland little smile aggravated Vanya. His poisonous dwarf.

As usual, Dominika was a vision, dressed in a navy-blue wool skirt and jacket, her hair up in the regulation bun. She looked quickly at Alexei Zyuganov, and the black triangles behind his head. She was not so new in the Service as not to have heard about his handiwork in the torture cells of the Lubyanka during the waning years of the Soviet Union.

They were whispered stories, unbelievable, repeated only between close friends inside the Service. Zyuganov had been one of two chief Lubyanka executioners in the old days, young for the job but suited to it simply because he was immune to its horrors. It was said the dwarf had a fascination for his executed prisoners as they hung from the overhead beams, or lay on the tables or splayed on the sloping floor, heads down toward the drains. He would handle them, move them around—“ragdolling,” they called it—would lean them up against the wall so he could talk to them while fussily arranging and rearranging their limbs. Dominika imagined the dirty smocks, the purple necks, the—

“It seems like we are always sitting here, you and I,” said Vanya brightly. Dominika cleared her head of the cellars. She saw Vanya’s yellow halo, bright and broad. This would be an interesting meeting. “It’s good to see you again.”

“Thank you,” she said quietly. She braced herself.

“I am pleased to hear that General Korchnoi offered you a seat in the Americas Department.”

Oh, get on with it, she thought. “When Colonel Simyonov released me from the Fifth, I had no office. I am grateful to the general for the opportunity,” Dominika said.

“Korchnoi told me he was impressed with your work against the Frenchman,” said Vanya.

“Despite the fact that the operation was unsuccessful,” said Dominika.

“We all have our successes and failures,” said Vanya, bathed in yellow, acting sweet.

Dominika’s voice rose a little. “The operation against Delon would still be progressing if the Fifth Department had not acted prematurely. We could have developed a penetration of the French Defense Ministry.”

“I read the file. There was promise. Why did we not?” interrupted Zyuganov mildly. Dominika willed her eyes not to grow large as she saw the parabolas of black unfold from behind Zyuganov’s shoulders like bat wings. Shaitan, thought Dominika, pure evil.

“You’ll have to ask the chief of the Fifth Department,” said Dominika, not looking into Zyuganov’s eyes, not wanting to see what lived behind them.

“Perhaps I shall,” said Zyuganov.

“Enough. There’s no value in recriminations. Corporal Egorova, it is not your place to question the decisions made by senior officers,” said Vanya mildly.

Dominika kept her voice level as her eyes never left her uncle’s. “This is why the Service is struggling to exist. This is why Russia cannot compete. Attitudes like this. Officers like Simyonov. They are krovopiytsy, attached to the belly, sucking blood, impossible to remove.” There was silence in the room as they stared at each other. Zyuganov watched her face; his hands did not move on the arms of his chair.

“What am I to do with you, niece?” said Vanya finally, getting up from his desk and walking to stand in front of the picture window. “Your record is strong, you should not jeopardize the career ahead of you. The manner in which you have spoken to me already is enough for your separation from the Service. Do you wish to continue your complaints?” And think about your mother, thought Dominika.

“And think about your mother,” said Vanya. “She needs your support.”

“I am taking advantage of our relationship, I know,” said Dominika. “But our work is too important to let it be done starinnyj, in the manner it has always been done.” She turned to watch her uncle at the window and knew two things. Vanya did not care about any of this, he had another agenda that involved her, and she had some latitude in her comments. She also knew Zyuganov was drinking her words in, she could feel him radiating like a furnace. He was a creature that was not content unless he had prey. She did not look at him.

Looking out the window, Vanya shook his head. Welcome to the modern SVR, he thought—improvements, reforms, public relations, and women in the Service. Junior officers could criticize the old ways. “So you do not like the old ways?” said Vanya.

“I do not like to fail at an operation that could have succeeded, whatever the reason,” said Dominika.

“And you believe you are ready to manage your own operation?” said Vanya softly.

“With guidance and advice from officers like you and General Korchnoi . . . and Colonel Zyuganov, of course,” said Dominika. She forced herself to include the little cadaver-lover sitting beside her. He turned his head toward her, jug-handle ears extended, and nodded.

“Most would say you are too young, too inexperienced, but we shall see.” Dominika noted the tone of Vanya’s voice, the honeyed phrase before the knout. “The nature of the assignment I have in mind unfortunately will take you out of the Americas Department.”

“What is the assignment?” she asked. She would scream if he told her she would have to seduce someone.

“It is a foreign assignment, to a rezidentura, to do real operational work. A recruitment operation.” Vanya’s own recollection of foreign operations was dim, but he spoke as if he relished it himself.

“A foreign assignment?” Dominika did not know what to say. She had never been out of Russia.

“To Scandinavia. I need someone new, fresh, with those instincts you have displayed,” he said. You mean with a man, she thought bitterly. He saw her eyes and put up his hand. “I don’t mean what you’re thinking. I need you as an operupolnomochenny, an operations officer.”

“That’s what I want to be,” said Dominika. “To be a member of the Service, to work for Russia.”

Zyuganov spoke, his voice mild and oily, the words coal-black. “And so you shall. This is a delicate task which will require great skill. One of the most difficult tasks. You must destroy an American CIA officer.”


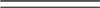


From his office, Maxim Volontov, SVR rezident in the Russian Embassy in Helsinki, watched Dominika walk across the hall to return the dun-colored file to the file room for the evening. Since she had arrived in the rezidentura from Moscow, Dominika would check out the file each morning and take it to a work area to read, usually writing in a notebook, taking notes. At the end of each day she would return it to the file clerk per established rezidentura practice. Besides Volontov, Dominika was the only officer allowed to check out this particular file. It was a copy of the SVR papka on the American CIA officer Nathaniel Nash, transmitted from Yasenevo.

Volontov noted the dancer’s legs, the body beneath the tailored shirt. Volontov was fifty-five years old, warty and stout, with a silver-gray 1950s Soviet pompadour. He had one steel tooth in the back of his mouth, visible only when he smiled, which was never. His suit was dark, baggy, and shiny in places. If modern spies today are made of space-age composites, Volontov was still steel plates and rivets.

Dominika observed with interest the orange haze of deceit and careerism around his bullet head. Orange, different from the yellow-tinted walruses back home. But he had been around for many years, during the really difficult times in the KGB, and was a protean survivor. Those specific instincts told him to handle the niece of SVR First Deputy Director Egorov carefully, even though it rankled. Plus this young bombshell was here on a special assignment. A sensitive one. After a week of preparation, Dominika tonight was to attend her first diplomatic reception—National Day at the elegant Spanish Embassy—to see if she could spot the American Nash. Volontov would also be there, watching from across the room. It would be interesting to see how she would work the reception. Volontov’s diesel-fueled thoughts turned to the excellent hors d’oeuvres the Spaniards always served.

Dominika had been put in a temporary apartment in the old quarter of Helsinki hurriedly rented by the rezidentura per directions from Moscow, separated by design from the Russian Embassy community typically jammed into tiny apartments on the compound. Helsinki was a wonder. She had looked in amazement at the tidy streets, buildings with scalloped cornices, painted yellow and red and orange, and lacy curtains in the windows, even the shops.

In the comfortable little flat, Dominika got ready for Spanish National Day. She put on her makeup, slipped into her clothes. She brushed her hair; the brush handle felt hot in her hand. For that matter, she felt hot, ready for battle. Her little flat was awash in undulating bars of color: red, crimson, lavender; passion, excitement, challenge. She reviewed what she had been instructed by Volontov to accomplish with the American. This first night, establish contact; in the coming weeks, arrange a follow-up, then regularize encounters, develop bonds of friendship, build trust, uncover his patterns and movements. Get him talking.

She had been briefed in the Center. Before she left Moscow, Zyuganov had spoken to her briefly. “Corporal, have you any questions?” he asked. Without waiting for her reply, he continued. “You realize that this is not a recruitment operation, at least not in the classic sense. The primary goal is not foreign intelligence.” He licked his lips. Dominika kept quiet and kept still. “No,” said Zyuganov, “this is more a trap, a snare. All we require is an indication—active or passive, it doesn’t matter—when and how this American meets his agent. I will do the rest.” He looked at Dominika with his head tilted slightly. “Do you understand?” His voice grew silkier. “Obdirat, I want you to flense the flesh from his bones. I leave it to you how to do it.” He locked on her eyes. Dominika was sure he knew she could see colors. His own eyes said, Read me, if you can. Dominika had thanked him for the instruction and had hurried away.

This Nash was a trained CIA officer. Even a single contact with him was going to require great care. But the difference was that this operation against the American was hers to manage now. It was hers. She put down the brush and gripped the edge of the vanity as she looked into the mirror.

She stared back at herself. What would he be like? Could she sustain contact with him? What if he did not like her? Could she insert herself into his activities? She would have to determine the right approach to him quickly. Remember your techniques: elicit, assess, manipulate his vulnerabilities.

She leaned closer to the mirror. Rezident Volontov would be watching, and the buivoli in the Center would also be observing the outcome, the buffalo eyes of the herd all turned her way. All right, she would show them what she could do.

Americans were materialistic, vain, nekulturny. The lectures at the Academy insisted that the CIA accomplished everything with money and technology, that they had no soul. She would show him soul. Amerikanskiy were also soft, avoiding conflict, avoiding risk. She would reassure him. The KGB had dominated the Americans in the sixties during Khrushchev’s Cold War. It was her turn now. Her hands ached from gripping the vanity. Dominika shrugged on her winter coat and turned for the door. This CIA boy had no idea what was going to happen to him.


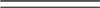


The palatial ground-floor public room of the Spanish Embassy was brightly lit by three massive glittering crystal chandeliers. Rows of French doors lined one side of the room leading to the ornamental garden, but were closed against the late fall frost. The room was jammed full, and a hundred images scrolled past Dominika as she stood on the low landing looking down at the guests. Business suits, tuxedos, evening gowns, bare throats, upswept hair, whispered asides, guffaws with heads held back. Cigarette ash on lapels, a dozen languages going at the same time, glasses wrapped with wet paper napkins. The partygoers circulated in a constantly changing pattern, the din of their voices a steady roar. Groaning boards were arranged along the outer margins of the room with food and drink. People were lined up three deep. Dominika forced herself to tamp down the kaleidoscope of colors, to manage the overload.

She wondered how she was going to catch sight of Nathaniel Nash in this herd. He might not even be here tonight. Minutes after she had entered the reception room, she had already been cornered by several older men, diplomats by the look of them, who leaned in too closely, spoke too loudly, looked too obviously at her chest. Dominika wore a muted gray suit with a single string of pearls; the jacket was buttoned, with occasionally a hint of black lace underneath. Nothing slutty, Dominika thought, but sophisticated-sexy. Certainly Scandinavian women could dress tarty. For instance, that statuesque blonde standing beside double French doors swelled out of her cashmere top, every terrain feature visible. Her hair was so blond it was almost white, and she played with it as she laughed at something a young man said to her. The young man. It was Nash. She knew his face from a hundred surveillance photos in his file.

Dominika slowly made her way toward the French doors, but it was like pushing through evening crowds in the Moscow Metro. When she got to the French doors, Miss Scandinavia and Nash were gone. Dominika tried looking for the woman’s blond head—the Amazon was half a head taller than everyone else in the room—but could not see her. As taught at the Academy, Dominika walked clockwise around the outer edges of the reception room, scouting for Nash. She approached one of the buffet tables where Rezident Volontov was standing, his plate and his shovel mouth both brimming with tapas. He was making no attempt to talk to anyone. He popped a piece of tortilla española into his mouth, oblivious to the crowd around him.

Dominika continued circling the outer edges of the room. She could see the broad shoulders of the big blonde, surrounded by the delighted, sweaty faces of at least four other men. But no Nash. Finally, Dominika saw him in the corner of the room, near one of the service bars.

Dark hair, trim figure, he was dressed in a dark blue suit with a pale blue shirt and simple black tie. His face was open, his expression active. He has a dazzling smile, Dominika thought; it radiated sincerity. She stood close beside a column in the ballroom, casually enough, but unobserved by the American. What was most remarkable, what surprised Dominika the most, was that Nash was suffused with a deep purple, a good color, warm and honest and safe. She had seen it around only two other people before: her father and General Korchnoi.

Nash was speaking to a short, balding man in his fifties with a bulbous nose who she recognized as one of the translators in the Russian Embassy, what was his name? Trentov? Titov? No, Tishkov. The ambassador’s translator. Spoke English, French, German, Finnish. She edged closer, using the crowd at the bar as cover, reached for a glass of champagne. She heard Nash speaking excellent, unaccented Russian to the sweaty Tishkov, who was holding a water glass half-full of scotch. He was listening to Nash nervously, giving him fitful upward glances, nodding his head occasionally. Nash even talked like a Russian: His hands opened and closed, pushed the words around in the air. Remarkable.

Dominika sipped from her champagne glass and moved closer. She watched Nash over the rim of her glass. He stood easily, not crowding Tishkov, but leaning forward to be heard over the din in the room. He was telling the little potato the story of a Soviet citizen who parked in front of the Kremlin. “A policeman rushed over to him and yelled, ‘Are you crazy? This is where the whole government is.’ ‘No problem,’ said the man. ‘I have good locks on my car.’ ” Tishkov was trying not to laugh.

From the other end of the buffet, Dominika watched Nash fetch another scotch for Tishkov. Tishkov was now telling his own story, holding on to Nash’s arm as he spoke. Nash laughed, and Dominika could actually see him applying the force of his charm on the man. Attentive, charming, discreet, Nash was putting Tishkov at ease. He’s a spy, thought Dominika.

Dominika looked beyond Nash and Tishkov at Volontov halfway down the room. The warthog rezident was oblivious to a textbook encounter between an American intelligence officer and a potential target. Nash looked up for a second and quickly scanned the room. Their eyes met and caught for a beat, Dominika looked away, and Nash quickly turned his attention back to Tishkov. He didn’t register seeing her. But in that split second, Dominika felt a jolt, the first-time electric zing of seeing your target up close. Her quarry. They used to call them the Main Enemy.

Dominika eased back behind the column and watched the American. Fascinating, that easy-standing attitude. The younger man was keeping the older Tishkov interested. Confident but not nevospitannyi, not boorish or swaggering, nothing like her former colleagues in the Fifth. Sympatichnyi. Her earlier nerves about making contact, about engaging with the American, evaporated. She itched to approach him right then, get into his space, into his head, as she had practiced with Mikhail in Moscow, using her face and figure to get his attention. A simple matter of edging closer, a quick introduction . . .

No. Calm yourself. With Tishkov around, Dominika would not approach him. Instructions from the Center regarding Nash were specific. Contact must be private, unofficial, and no one in the embassy was to know, save Volontov. She would stay professional, exacting, calculating. It was what the operation required, and she was not going to deviate. To meet him, Dominika needed a better strategy than simply planning to attend all the diplomatic functions in Helsinki for the next calendar year.


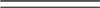


Several days later, fate supplied Dominika the opportunity she needed, at a venue she could not have predicted. Despite a modest street entrance under an unassuming neon sign, the Yrjönkatu Swimming Hall in downtown Helsinki was a neoclassical gem, built in the 1920s, located several blocks from the train terminal. Copper Art Deco lamps along a balustraded mezzanine above the elegant pool cast movie-set shadows on the gray marble pilasters and glimmering tile floors.

Thanks to constant swimming-therapy sessions at ballet school, Dominika was a strong and devoted swimmer. She began going to the pool, a few blocks from her apartment, as an outlet. She favored the noon hour. Going in the evenings was too dark, too cold, the walk home alone too depressing. Besides, she was becoming increasingly lonely and fitful. Volontov, reflecting Moscow’s impatience, was pressing her for progress on meeting Nash; he didn’t care that engineering a plausible, random “bump” on a target, even considering the smallish size of Helsinki, was not automatic.

Dominika’s breakthrough came when she was asked by Volontov to complete an urgent update report to Yasenevo. She missed her noonday swim. So she went after work, despite the dark and cold. And saw Nate come out of the men’s locker room and walk around the edge of the pool, a towel draped around his neck. Dominika was sitting at the far end of the pool, legs trailing in the water, when she saw him. Without haste she got up and moved closer to one of the marble pillars and watched him. He swam smoothly and powerfully. Dominika watched his shoulders bunch and flex as he plowed through the water.

Dominika fought down her nervousness. Should she take the plunge, literally and figuratively? She could wait and report to Volontov that she had discovered one of Nash’s patterns and that she was moving ahead with plans to establish contact. But that would be viewed only as a delay. She should move now, this instant: Privodit’ v dejstvie, they had said at the Academy, throw the operation into action. This was a perfect chance for a first contact that would seem random and uncontrived. Move.

Dominika was wearing a modest one-piece racing suit and a plain white swimming cap. She slipped into the water and slowly made her way across several lanes to the one beside Nate’s. She began swimming slowly down the lane, letting Nash pass her, then pass her again on the next length. She timed his third overtaking pass to occur at the end of the pool as Nate made a relaxed open turn and started another lap.

Dominika began swimming to stay even with Nash, which she found she could do with ease. Neither was swimming very hard. Through her goggles, Dominika could see his body underwater, rolling rhythmically in a smooth freestyle. At the far wall, Dominika and Nate both touched at the same time and started the return lap to the deep end. By this time, Nate noticed another swimmer keeping pace with him. Looking underwater, he saw it was a woman, sleek in a racing suit, stroking smoothly and strongly.

Nate dug a little harder to see if a dozen deeper pulls would draw him slightly ahead of the mystery swimmer. She stayed even, without apparent effort. Nate pulled harder, flexing his lats. She kept up. Nate increased his kick rate slightly and checked. She was still there. The wall was coming up and Nate decided to go at it hard, nail a flip turn, and crank up his stroke rate to the opposite wall. Let’s see if she can hit a turn and finish with a sprint. He took a breath as he came up to the wall. Nate’s legs came over his shoulders, his feet slapped explosively on the tiles, and he came off the wall clean and hard, ready to motor. He cycled his arms, elbows high, driving, pulling, the metronome chop chop chop of them entering the water filling his ears. He cranked up his kick and felt the lift of the bow wave around his head and shoulders. Smooth and fast, he limited breaths to one side, away from the girl. There would be plenty of time when he touched to wait for her to come churning up to the wall. For the last five yards, Nate stretched and glided, turning on his side to face in the girl’s direction. But she was already there, her wake hitting the wall as he touched. She had touched him out. She looked over at him as she stood up in the shallow end, peeled the cap off her head, and shook her slightly damp hair.

“You swim beautifully,” Nate said in English. “Are you on a team?”

“No, not really,” said Dominika. Nate took in her strong shoulders, elegant hands holding the wall, plain short nails, and those blue eyes, electric, wide. Nate had pegged her accented English as Baltic or Russian. There were a lot of Finns who spoke English with a Russian accent.

“Are you from Helsinki?” asked Nate.

“No, I’m Russian,” said Dominika, watching his face for a reaction, for contempt, dismissal. Instead, there was the brilliant smile. Go ahead, Mr. CIA, she thought. What will you say now?

“I saw the Dynamo Swim Team compete in Philadelphia once,” said Nate. “They were very good, especially in the butterfly.” The water of the pool sloshed over his shoulders, reflecting his purple haze.

“Of course,” said Dominika. “Russian swimmers are the best in the world.” She was going to say, As in all sport, but kept quiet. Too much, she thought, settle down. All right, contact made, nationality established, now set the hook. Tradecraft from the Forest. She moved to the ladder to climb out of the pool.

“Do you come here in the evenings?” Nate asked when Dominika said she had to go. The muscles in her back flexed as she climbed up the ladder.

“No, my schedule is irregular,” said Dominika, trying not to sound like Garbo, “very irregular.” She searched his face; he looked disappointed. Good. “I don’t know when I will be back, but perhaps we’ll meet again.” She felt his eyes on her as she climbed out of the pool and walked into the women’s locker room.


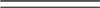


As it turned out, Dominika and Nate met again at the pool two days later. She nodded noncommittally to his wave. They swam more laps, swimming side by side. Dominika played it slow, indifferent. She was correct, reserved, a conscious counterbalance to his shambling American informality. She constantly told herself not to be so nervous. When he looked at her she knew from his expression that he was unsuspecting. He doesn’t know what this is, she thought with a thrill. The CIA officer doesn’t know who he’s up against. When it was time to go, she again got out of the pool without delay. This time she looked back at him. An unsmiling wave. That was enough for now.

Over the course of several weeks they met five or six times, and not one of them was by chance. Dominika had cased the Torni Hotel, diagonally across the street from the pool entrance. Most evenings Dominika would be in the sitting room at the window observing his arrival. As far as she could tell, he never was accompanied by anyone. He was surveillance-free.

Dominika tried to build momentum in minute and undetectable stages. As they continued meeting at the pool it was natural that they introduced themselves. Nate said he was a diplomat in the American Embassy working in the Economic Section, Dominika said she was an administrative assistant in the Russian Embassy. She heard him recite his cover legend, and gave her own. He’s very natural, thought Dominika. What sort of training do they get? Typical, trusting American, incapable of a true konspiratisa. He looked at her without guile, his purple halo never changed.

God, she’s serious, thought Nate. Typical Russian, afraid of putting a foot wrong. But he liked her reserve, her underlying sensuality, the way she looked at him with her blue eyes. He especially liked the way she pronounced his name, “Neyt.” But he gloomily told himself she could not have access to secrets. Come off it, she’s just a beautiful Russian Embassy clerk. Twenty-four, twenty-five, Muscovite, Foreign Service, junior admin, remember to get the patronymic and family name off the registration card at the pool. To have gotten out of Moscow this young, she probably has a sugar daddy. Not hard to believe, looking at that face, the body underneath the spandex. Unattainable. Nate decided to send in traces, just for form’s sake, but knew he’d be moving on.

This was not a honey trap against a hapless European on her home turf, Dominika told herself. This was an operation in the foreign field against a foreign intelligence officer. She was Center-trained, she knew she would have to reel him in carefully. She had filed an initial contact report to Yasenevo, detailing the first few contacts. Volontov was pressing for forward movement.

A couple of weeks, no response from Langley on the trace cable. Typical, but who cares? thought Nate. It was enough to meet her occasionally and drink in that face. He had gotten her to smile twice, her English was good enough to get a joke. He wasn’t going to spout off in Russian and scare her.

One evening, as they finished swimming, they turned to climb the ladder to get out of the pool. They bumped into each other. Her suit clung to her curves. Nate could see her heartbeat beneath the drum skin of spandex. He offered Dominika his hand climbing up the ladder. Her hand was strong, hot to the touch. He held it for a beat and let go. Face impassive, no reaction. He held her eyes for another beat. She took off her swim cap and shook her hair.

Dominika knew he was looking at her, kept calm, distant. What would he say if he knew she had been trained as a Sparrow, if he knew what she had done with Delon and Ustinov? She would not, absolutely not, seduce him. She would hear the cackles all the way from Moscow. No, she was going to accomplish this with discipline, with cleverness. Move it forward, she thought. Time to start opening the human envelope, to shake up that frustratingly consistent purple mantle.

Dominika said yes to Nate’s suggestion that evening that they stop for a glass of wine in a neighborhood bar. His face had lit up with surprise, then pleasure. Seeing each other in street clothes on the sidewalk seemed strange. Dominika sat firmly on the other side of the little table, nursing a glass of wine.

Now elicitation: Where are you from in the United States? Do you have brothers and sisters? What does your family do? She was going down the list, filling in the blanks in his papka.

If Nate didn’t know better, this would have sounded like a debriefing. Maybe she’s just nervous, deflecting questions about herself. When Russians aren’t being intense, he thought, they’re being obtuse. Well, let her relax. He was not going to spook her by going in too hard. Spook her from what? he asked himself. She wasn’t a target and he wasn’t going to bed her.

He ordered black bread and cheese. Very clever, she thought, he thinks that’s all we Russians eat. A second glass of wine? No, thank you. It was Dominika who finally said she had to go home. Nate asked if he could walk her home. At the front door to her small, modern apartment block, she saw him wrestle with the enormousness of leaning in for a peck on the cheek, she watched him trying to decide—men are all alike—then gave him her hand, shook his once firmly, and went inside. Through the glass door she saw him turn away, hands in his pockets.

The trained SVR intelligence officer, graduate of Sparrow School and the AVR, congratulated herself on a good evening, good progress, especially how she had cut him off from that kiss. Then she laughed. Some courtesan you are, she thought, the slayer of gangsters, the seducer of diplomats, and now otkazatsya, denying a good-night kiss.


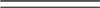


“Hey, Romeo,” said Forsyth, leaning into Nate’s small office in the Station, “did you see the incoming from Headquarters this morning on Esther Williams?” Forsyth was referring to the results of the name-trace request Nate had cabled in on Dominika Egorova; DPOB: 1989, Moscow; Occ: Administrative assistant, Russian Embassy. He had drafted the cable more than a month ago. Nate expected that there would be “No Hqs traces” on the woman, she wasn’t even on the local dip list. She had told Nate she held a junior admin rank, the absolute bottom. The rest of Nate’s cable vaguely outlined the contact based on aperiodic meetings at the swimming pool. Totally useless, no access, no potential.

“No, I haven’t seen the cable,” said Nate. “Is it on the reading board?”

“Here’s my copy,” said Forsyth. “Take a look at this.” Forsyth chuckled as he handed the cable to Nate. As Nate started reading, Gable appeared behind Forsyth.

“Has Tommy Fuckfaster read the traces?” said Gable. He too was laughing. Nate didn’t look up and continued reading:

1. Traces on subject ref indicate confirmed status as SVR Corporal in possibly Directorate I (Computer and Information Dissemination). Approximate SVR EOD date 2007–08. Graduate of Foreign Intelligence Academy (AVR), 2010. Probable family connection to SVR First Deputy Director Ivan (Vanya) Dimitrevich EGOROV. Subject posting to Finland not reflected in Russian Federation Foreign Ministry lists, suggesting TDY status and/or specific operational assignment of limited duration.

2. Headquarters Comment: Reference contact is of interest to Hqs. Subject’s family tie to SVR leadership arguably provides her with unique access and represents an opportunity for significant recruitment.

3. Applaud Station diligence in aggressive spotting and developmental activity. Encourage Station officer to pursue subject for additional assessment and development. Hqs standing by to support Station ops plan as required. Regards.

Nate looked up from the cable at Forsyth and Gable. “You can’t get a better trace response than that,” said Forsyth. “This could work out to something big if you can take it all the way to recruitment.”

Nate could feel cement filling his legs. “This feels wrong, Tom; she’s not plugged in, she’s too junior. Remains to be seen whether she’s recruitable. There’s something distant and closed up about her.” He looked at the cable again. “Women haven’t been allowed into the Academy for the last fifty years. I could waste six months trying to develop her for nothing. I think I should concentrate elsewhere.”

Gable leaned farther into the room past Forsyth’s shoulder. “That’s right, think it all through.” He laughed. “Are you fucking kidding me? A knockout like that, plus a close relative to someone on the top floor of the SVR? You better check it out, good and hard. Never mind going after someone else. This is a fucking ripe plum just waiting to get plucked.”

“I get it, I get it,” said Nate. “It’s just that she doesn’t seem like the type who’s an SVR operator. Dour and scared, at least that’s my assessment.” He shrugged and looked at the other two.

“Well, assess away, kiddo. You got yourself a solid developmental prospect,” said Gable as he left the office. “Let’s talk ops plan when you’re ready,” he said over his shoulder. Forsyth turned to leave, gave Nate a wink.

Nate looked at Forsyth and nodded. Okay, let’s see where this goes, he told himself. A waste of time. C’mon, get motivated. From right now, Dominika Egorova was something more than a beautiful face. She was his development target.


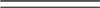


Up the road from the US Embassy, in the Russian Embassy, Rezident Volontov was haranguing Dominika on the slow progress of her operation.

“Corporal Egorova, you have made a good start, but your progress has been too slow. General Egorov has sent three requests for updates since you arrived. You must redouble your efforts to move your friendship with Nash forward. More frequent meetings. Ski trips. Weekend trips. Be inventive. General Egorov once again recommends that you cultivate in Nash an emotional dependency on you.” Volontov sat back in his chair and ran greasy fingers through pomaded hair.

“Thank you, Colonel,” said Dominika. Her uncle, Simyonov, and now this smelly throwback. “Can you tell me, please, what Director Egorov means by ‘emotional dependency’?” Her level gaze dared him to suggest she seduce the American.

“I’m sure I cannot speak for the Deputy Director,” said Volontov, swerving away from the washed-out bridge of their conversation. “All you need to focus on is to move the relationship forward. Develop bonds of trust.” Volontov waved his arm in the air to illustrate what “bonds of trust” might mean. “Most important, get him talking about himself.”

“Of course, Colonel,” said Dominika, getting up from her chair. “I will push forward and keep you informed. Thank you for your valuable guidance.”

After her session with Volontov, Dominika was deflated. He operated in a puerile, slimy world full of sly hints, insinuations. “Bonds of trust,” “emotional dependency.” Sparrow School. Would she have to deal with that her entire career?

Walking home, Dominika thought furiously. Snap out of it. She was on assignment in a foreign country, living in her own apartment in a fairy-tale little city. It was wonderful. She had an important job to do, against a trained American intelligence officer. Well, he did not seem dangerous, but he was a CIA officer, and that was enough. Tonight she’d get him to talk more about himself. She’d ask him what he thought of Russians—he had not yet admitted he spoke the language. She would get him to talk about Moscow. He had to admit to his posting there. As she walked quickly down lighted streets toward Yrjönkatu, unaware that her limp was more pronounced, she looked forward to the contact.

Walking toward Yrjönkatu himself, Nate was thinking hard, so preoccupied that he realized he was oblivious to the street, that he was ignoring his six. Wake up, sport, he thought, this is the first night of your new case. He used a red light to cross the street and change his directional flow, to catch a look as he watched for traffic. No hits, no casuals. Walk three more blocks and do it again. No repeats. This is no longer a splashy fun romp with a blue-eyed Slav in wet spandex. No, if she was an SVR officer—and he still doubted it—he’d have to pay attention and do some more assessment. God, he’d rather be working that drunk Tishkov. At least he’d have access to documents and the minutes of private meetings. That would be a real scalp, something that would start a buzz back home.

Also lost in thought, Dominika likewise neglected to check for surveillance until she was three blocks from the pool. To atone for her inattention, she did a preposterous reverse in an alley—the pensionerki would have howled—and felt ridiculous. As both of them absentmindedly flailed away on the street, they turned different corners and arrived at the front door of the swimming hall at the same time. Dominika’s breath quickened, Nate’s pulse increased, but they both remembered what each had to do to the other, and got down to work.


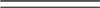


Dominika leaned back against the wooden partition of the booth. Long fingers slowly twisted the stem of her wineglass. Nate sat across from her, legs extended and crossed at the ankle. He was dressed in a V-neck sweater and jeans, she in a blue cable-knit top and pleated skirt. She wore dark tights and black low-heeled shoes. Nate noticed she bounced her foot under the table.

“Americans never take things seriously enough,” said Dominika. “They are always making fun.”

“How many Americans do you know?” asked Nate. “Have you been to the United States?”

“There was a foreign student, an American boy, at ballet school,” said Dominika. “He was always joking.” She did not mind mentioning ballet, it was part of her legend.

“But was he a good dancer?” asked Nate.

“Not especially,” said Dominika. “The program was very difficult, and he did not apply himself.”

“It must have been lonely for him,” said Nate. “Did you show him around Moscow, go drinking together?”

“No, of course not, it was forbidden.”

“Forbidden? Which part? Drinking or making him feel welcome?” said Nate, looking at his wineglass. Dominika looked at him for a second, then averted her eyes.

“You see, always making jokes,” she said.

“It’s not a joke,” said Nate. “I just wonder what he will remember about Russia, about Moscow. Will he have fond memories of the city, or will he remember only being lonely, unloved?” What a strange thing to say, thought Dominika.

“What do you know about Moscow?” she asked, already knowing part of the answer.

“I lived there for a year, I think I told you before, working in the American Embassy. I lived in the housing compound next to the chancery.”

No interest, no inflection. “Did you like it?” she asked.

“I was always busy, not enough time really to explore the city.” He took a sip of his wine and smiled at her. “I wish I had known you, though; you could have shown me around. Unless it was forbidden.”

Innocent little boy, she thought. What an act. Dominika ignored the comment. “Why did you leave after a year? I thought diplomats stayed longer than that.” His answer would be the lead sentence of her report.

“There was a sudden vacancy in Helsinki,” said Nate. “So I made the change.” Very smooth, thought Dominika. She noted that the purple around his shoulders did not change when he did not tell the truth. Very professional.

“Were you sad to leave?” asked Dominika.

“In some ways, yes,” said Nate. “But I felt sad for Russia as well.”

“Sad for Russia? Why?”

“We finished the Cold War without blowing each other up, came close a couple of times. Whatever you thought about the Soviet system, it was over. I think everybody hoped Russia would see a new day, freedoms, a better life for its citizens.”

“And you think life is not better in Russia now?” said Dominika, trying to tamp down the indignation in her voice.

“In some ways, yes, of course,” said Nate, shrugging. “But I think people still struggle. The cruelest outcome is seeing a new age dawning, but nothing coming of it.”

“I do not understand,” said Dominika.

Let’s see if she takes the bait, he thought. “Don’t take this the wrong way, but I think that your current leaders are creating a system as notorious as the Soviet system of the past. But it’s not as evident. It’s more modern, telegenic, plugged-in. The new weapons are oil and natural gas, but behind the scenes there’s just as much cruelty and repression and corruption as before.” Nate looked at Dominika sheepishly and raised his hands. “Sorry. Didn’t mean to criticize.”

Despite all the training and practice, Dominika had never before engaged with an American in such a discussion. She had to keep in mind that he was an intelligence officer, was adept at saying provocative things to elicit comments from her. She told herself to relax. This was no time for her to lose control. Still, she had to respond. “What you say is not correct,” said Dominika. “This is the sort of anti-Russia attitude that we are constantly aware of. It is simply not true.”

Thinking about the renegade KGB officer poisoned by polonium and the journalist shot in her elevator, Nate finished his wine. “Tell that to Alexander Litvinenko or Anna Politkovskaya,” said Nate.

Or Dimitri Ustinov, thought Dominika guiltily. But she was still furious with him.

SPANISH EMBASSY TORTILLA ESPAÑOLA

Cook seasoned, medium-sliced potatoes and chopped onions in abundant olive oil until soft, then remove and drain. Add beaten eggs to potatoes and onions and return to oiled pan on medium heat until edges and bottom start to brown. Place plate over skillet, invert, then slide tortilla back into pan and cook until golden brown.

11

Nate sat in the Station staring through the slats of the venetian blinds on the window in his office. He absentmindedly batted the cord of the blinds, making the plastic handle hit the wall and bounce back, click, click, click. Last night had been another National Day reception at some embassy. The half dozen calling cards on his desk amounted to squat, and there was a knot between his shoulder blades.

The thought of swimming reminded him of Dominika. He had looked hard at her, they had been out several times, but he still thought the case was going nowhere. She was a believer, way committed, no doubts, no vulnerabilities. He was wasting time. The plastic at the end of the cord clicked against the wall. The cards on the desk mocked him. A single paper—his latest cable on contact with Dominika—lay in a metal tray on his desk.

Gable stuck his head into his office. “Jesus, the fucking Prisoner of Zenda in the tower,” he said. “Why aren’t you out on the street? Take someone to lunch.”

“I struck out last night,” said Nate, staring out the window. “Four National Days this week alone.”

Gable shook his head, walked to the window, and yanked the slats of the blinds closed with a snap. He sat on the edge of Nate’s desk and leaned close.

“Bend over, Hamlet, I’m about to give you a pearl of wisdom. There is a perverse element to this HUMINT shit we do. Sometimes the harder you try to find a target, to start a case, the farther away it gets from you. Impatience, aggression—in your case, desperation—gets in the air like a whiff of sulfur, no one wants to talk to you, no one will dine with you. Sulfur in the wind. You smell like rotten eggs.”

“I don’t follow you,” said Nate.

Gable leaned closer. “You got performance anxiety,” he drawled. “The longer you stare at your pecker, the softer it’s gonna be. Keep trying, but ease off the accelerator.”

“Thanks for the graphic image,” said Nate, “but I’ve been at Station for a while and I have nothing to show for it.”

“Stop, or I’ll start weeping,” said Gable. “The only guys you have to please are me and COS, and we ain’t complaining . . . yet. You got time, so keep going.” Gable picked up the cable in Nate’s in-box.

“Besides, this Russian sugar-britches is gold waiting to be mined, your professional assessment notwithstanding. Get to work on her, for Christ’s sake. I have an idea how we can blow air up her skirt for a better look.”


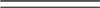


Gable suggested they direct the small Station surveillance team on Egorova to get a sense of what she was doing in Helsinki. Putting surveillance on her struck Nate as overkill. He had been trying to tell Forsyth and Gable that Egorova was a low-level target, an admin type with no access. Surveilling her was a waste. “Let’s agree to disagree,” Gable said. “In other words, shut the fuck up.”

Forsyth held up his hand. “Nate, since you’re the action officer with Egorova, why don’t you handle the team while they cover her? Useful experience, and you can provide input. They’re an interesting old couple. They’re both sticklers for tradecraft.”

Great, thought Nate. Gable had made the suggestion to employ surveillance to kick-start the operation, and Forsyth assigned him to run the team to focus him on the case. Forsyth and Gable worked well together, real pros, they knew how to motivate their officers.

Gable slid the file to him, daring him with a look to say anything. “Here’s the file on ARCHIE and VERONICA.” He paused for a beat. “These two are legends. They’ve been working since the 1960s. Worked some shit-hot ops over the years, including Golitsyn’s defection. Tell ’em I said hello.”

Twenty-four hours later, after a two-hour vehicular SDR that took him north for an hour on the E75 and then west on secondary roads to Tuusula and back into the city on the 120, Nate ditched his car in public parking at the Pasila train station and walked into Länsi-Pasila, a district of high-rises and commercial buildings. He found the right one, a modest apartment block of four stories of brick and glass, with enclosed angular balconies. He pressed the intercom button marked RÄIKKÖNEN and was buzzed in. Nate rang the bell at the door of the fourth-floor apartment.

“Come in,” said the elderly woman who opened the door. Spry. In her seventies. VERONICA. Her face was narrow and patrician, with a straight nose and firm mouth that hinted at what must have been considerable beauty in her youth. Her ice-blue eyes were still striking, her skin was pink with good health. Her thick white hair was in a bun and a pencil stuck out of it. She wore woolen pants and a light sweater. Reading glasses hung from her neck, and there was a pile of papers and magazines on the floor beside a chair. “We’ve been eager to meet you,” she said. “I am Jaana.” She grasped Nate’s hand and shook it firmly. She radiated vitality and energy. Her grip, her eyes, the way she stood.

“Would you like a cup of tea? What time is it?” She checked her watch, which she wore with the face on the bottom of her wrist, a classic tell of a street surveillant, thought Nate. “It’s late enough to contemplate something stronger,” said Jaana. “May I offer you schnapps?” All this was said in a flurry of movements, gestures, smiles, twinkling eyes.

“Marty Gable sends his regards,” said Nate.

“How kind of Marty,” said Jaana, clearing a space on a cluttered coffee table. “He’s a dear. You’re lucky to have him as a supervisor.” She was shuttling back and forth from the kitchen with glasses and an unidentified clear liquid that seethed in an oval bottle. Schnapps. “We’ve seen some strange chiefs over the years,” she said, “on both sides. Of course, the Russians were uniformly worse, beastly clods trying to survive in their beastly system, bless them. They certainly provided us with interesting times.”

Jaana Räikkönen poured two glasses of schnapps, raised her glass in a Scandinavian toast, looking him in the eyes while taking the first sip. The living room was small and comfortable, with overstuffed furniture and bookshelves lining the polished wood walls. The house was filled with the smell of vegetable soup.

“Is your husband home?” asked Nate. “I hoped to meet him too.”

“He won’t be long,” said Jaana. “He was out on the street covering your arrival.” She shrugged. “I’m afraid it’s a habit with us.” Nate chuckled to himself. He had run a two-hour dry-cleaning route looking for a tail and had missed the old guy hanging around outside his building. That’s how they’ve operated for so long, he thought.

Just then a key rattled in the lock, the front door opened, and Marcus Räikkönen walked into the room. ARCHIE. He led a tan dachshund on a leash, which, after sniffing briefly at Nate, trotted over to his bed and flopped down. His name was Rudy. Marcus was tall, over six feet, and broad across the shoulders. He had clear blue eyes under bushy eyebrows. Muscular cords stood out on the side of his neck, under a sharp jawline. He moved easily, athletically. He was balding and wore his remaining hair in a buzz cut. His handshake was firm. He wore a dark-blue tracksuit with black training shoes. There was a small Finnish flag on the left breast of the suit.

“Across the street in the courtyard?” asked Nate. “The bench near the steps?”

“Good,” said Marcus. “I didn’t think you noticed.” He smiled and picked up the third glass of schnapps. “To your good health,” he said, draining the glass while looking Nate in the eyes.

Nate remembered the summary file on them. ARCHIE and VERONICA had been the core of Helsinki Station’s unilateral surveillance team for close to forty years. Both were retired pensioners now. ARCHIE had been an investigator in the Finnish Tax Administration, VERONICA a librarian. They were effective simply because they mixed different looks on the street with an instinct about what the rabbit was going to do next. Of course, they knew the city and its Metro system intimately, they had grown up as the city had grown. Dogged, discreet, with the patience and perspective of a lifetime, they could work on a target for months without being burned. Their style of coverage was what Gable had called “more of a wife’s caress than a doctor’s finger.”

Nate and the Räikkönens drafted a surveillance sked on Dominika, who they would cover irregularly but at carefully selected times—evenings after work, weekends—when something interesting was likely to occur. From afar Nate watched them work. Knit caps, mittens, and parkas one day, business suits and umbrellas the next. Bicycles with ting-a-ling bells and Rudy on a leash. An indistinct gray Volvo compact, a motor scooter with a basket. Sometimes they walked together, holding hands, sometimes apart. One day Jaana followed Dominika into a store using a walker. ARCHIE and VERONICA did it all—trailing surveillance, static, leading, crossing, parallel, leapfrog.

Nate met them again at their apartment after the first two weeks. They had taken a few photographs. Marcus summarized the results so far. His report was crisp, precise. Jaana would occasionally interrupt with observations. “First,” said Marcus, “we are quite sure that up until now she has not detected or suspected surveillance.” He shrugged his shoulders. “She is young, but we see considerable skill on the street. She does not resort to the usual tricks and she moves well, takes advantage of her surroundings. I would say she is significantly above average on the street.

“She knows her way around already. We observed her using specific tradecraft only once,” said Marcus, looking at Jaana. “She waits in the mezzanine of the Torni Hotel across the street from Yrjönkatu Swimming Hall to watch you arrive. She waits for a few moments after, then enters.”

“Marcus disagrees with me,” said Jaana, “but I think she is not operational. She is not handling agents and is not involved in operational support to the rezidentura. She does not have a job to do.” Jaana looked over to Marcus, waiting for the rejoinder.

“Of course she has a job to do,” said Marcus. “It’s just that we have not seen it yet. Give it time.”

“One thing is for sure,” said Jaana, ignoring Marcus. “She is lonely. She goes straight from the embassy to her little apartment. She buys groceries for one. She walks alone on the weekends.”

“Have you seen any hint of coverage on her?” asked Nate. “Is anyone from the rezidentura keeping tabs on her?”

“We think not,” said Marcus. “She is clear. We will keep looking for any indication that they are watching her.”

“I’m going to have more encounters with her,” said Nate. “I’ll need you to help cover some of our meetings outside the swimming hall.”

Marcus nodded. “As you see more of her it will become interesting. Especially what she does immediately after your meetings. That is when they always run to the phone or rendezvous with an embassy officer. As much as you can, let us know your plans. If you wish, we can make some suggestions for places to meet her,” Marcus said.

“One last thing,” said Jaana, pouring another glass of schnapps. “If you would forgive me, she looks like a nice person, a sweet girl. She needs a friend.” Marcus looked at her and back to Nate with arched eyebrows.


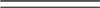


Nate reviewed ARCHIE and VERONICA’s reports with Gable. “Good, keep an eye on her, especially if she’s got anybody from her embassy supporting her,” said Gable. “If we see she’s got backup, then it’s possible she’s operational, maybe even she’s working on you.”

“Not in a million years,” said Nate. “No way.”

“Glad you’re so sure. Anyway, go after her, hard. Take your time, in a hurry.”

Nate set a goal of seeing Dominika at least once a week outside of the swimming. He scoured the city for places to meet without being seen. They met after work at basement bars, for coffee on Saturday mornings, lunches on Sundays at remote cafés. Put her in the chair with her back to the room. There were embassy Russians all over Helsinki, and Nate wanted to avoid a chance sighting. Build a friendship, stay clandestine, always arrive separately, leave apart. Stay off the phones, vary patterns, build a relationship. A waste of time.

Dominika applied her own tradecraft. She checked for coverage as she walked through the city to their meetings. Finns would stare at the beautiful dark-haired girl walking up the escalator, or slipping into a snowy alley, or leaving a store by a back entrance, unaware she was looking for coverage, or that she was watching from across the street as Nate arrived at their coffee shop, counting heads, looking at faces, marking hats and overcoats.

They were getting to know each other. Over the last few meetings they had talked, really talked, a natural evolution after spending time together. Dominika assessed Nate as honest, natural, intelligent. He was not nekulturny. He was, well, just American. His comments about living in Moscow were evasive, of course they would be, he was hiding the fact that he had been handling a Russian mole. Dominika didn’t much care for his comments about Russia, even though she knew she felt mostly the same way. Come on, get going, she told herself. She had to spend more time with him, continue concentrating on his patterns. She had to determine when he was operational.

She felt the pressure. If there was no breakthrough soon, with the Center and Volontov bearing down, would she contemplate a physical approach? Nelzya! she thought. No, never. He was attractive, his openness and humor appealing. But forget it.

How many meetings had there been? Nate felt the anticipation of seeing Dominika again, but he wasn’t convinced that he could persuade her of anything. She was unbending. Facing a hundred surveillance cars in Moscow didn’t faze him, but he fretted over how to determine what motivated her. If she had an operational agenda, Nate couldn’t identify it. It almost seemed as if she were in Helsinki just to get experience, and that didn’t make sense. The SVR connection was important, the aspect that made her a worthwhile recruitment target. He had to get a handle soon or Forsyth would grow impatient and Gable would kick his ass.

One thing. He could look at her face for hours. Jesus, listen to you. Concentrate on the developmental, on the assessment, what makes her tick. They talked more easily now, even though they disagreed. She got hot and fussy whenever he pinged on Russia, he could see that, but he also had a sense that she grudgingly agreed with him at times. She didn’t believe all the propaganda. Maybe an opening. Maybe not.

He looked into the mirror and combed his hair. This Sunday he had suggested lunch at a little ethnic restaurant in Pihlajisto, a crossroads community on the Metro line northeast of the city. Dominika had agreed to meet him there. Weeks before, ARCHIE had suggested it as out-of-the-way: “We will not encounter any Russian friends there,” he said. “One of us on the train watching her, the other covering you.” Nate threw on an oiled field coat over a V-neck sweater and corduroy pants. He wore ripple-soled walking shoes. He left his apartment and walked a stairstep route through the swept streets of Kruununhaka, then along the frozen waterfront, then kicked off his real dry-cleaning route.

Across town, Dominika was also looking in the mirror, her blue eyes wide. She did not use perfume, but combed her hair for the tenth time with the tortoiseshell talisman. She got ready to walk out of her apartment to take the Metro, taking a slantwise look through the curtains of her front window to the street below. She looked forward to this, talking to him, sparring, learning a little more each time.

She wore a turtleneck sweater and tweed jacket over woolen pants for warmth. She also wore sensible shoes. She tied a scarf over her head like an old babushka and left her apartment, locking the door. She went down to the basement of her apartment building, walked through the storeroom, and pushed through to the boiler room. A small corridor led from the room to a heavy iron-barred window high on the wall that Dominika had discovered several weeks ago. It looked as though it had been a coal chute, long since converted. It had taken her almost an hour to pick the padlocked grille two nights ago; the damn things weren’t easy, especially since she had only an improvised torsion wrench fashioned from a hairpin. Dominika stacked boxes under the window, boosted herself up, and wormed through the window. Some start to a date, she thought, thinking about seeing him again.

Dominika eased the window shut and stepped out into the alleyway, looking up at the curtained windows. Nothing. She walked quietly up the alleyway, squeezed between a parked truck and a Dumpster, boosted herself over a low brick wall and out onto a city street. She was already a block away from her apartment building. Her coat collar was turned up and the scarf hid her features. She walked west for another block casually, checking for repeats whenever she crossed the street and looked both ways for traffic. She entered the Kamppi complex, walked through the mall, stopped at a bookstore, checked for faces, then down into the Metro entrance. She stayed still on the slowly descending escalator, using the reflective bounce on the fashion posters on the walls. No silhouettes. Dominika was halfway to the platform level as a slight elderly lady dressed in a raincoat and floppy hat stepped on the escalator at the top and started down behind her. She was holding a bunch of flowers wrapped in green paper and a string bag with two apples. VERONICA hoped that one day she could speak to the dear girl about how predictable she had been, using the mall and its integral Metro station so close to her apartment.

Nate’s surveillance instructor a hundred dim years ago was named Jay, a former physicist who wore a Van Dyck beard and long sandy hair and looked, well, a lot like Van Dyck. “Get it out of your heads, stop being heroes,” he had said. “If you detect surveillance, your night is over, you will abort.” He had drawn a horizontal line on the chalkboard. “Your SDR is to compel surveillance you have not seen to show themselves. It is not designed to lose anyone. All surveillance has a breaking point,” he had said, intersecting the line with a vertical stroke. “This is the point when the bad guys must choose between staying undetected and losing the eye.” He brushed his hands of chalk dust. “If you can force them to show themselves without breaking their hearts, you have succeeded. For that night only. Then you have to start all over again.”

Fuck breaking their hearts, thought Nate. If he had coverage they’d have to show. He slid down an embankment near the rail yard behind the central station, climbed a chain-link fence in an alley, and dodged traffic as he crossed the E12. He wondered what she would be wearing. Along his route, Nate would look for ARCHIE, but he was wasting his time. The old man was a ghost on the street, protoplasm, smoke around dry ice. ARCHIE was countersurveilling Nate, looking for repeats using time and distance. Forget coats, forget hats, ARCHIE was looking at the way people walked, their gaits, the sets of their shoulders, the shapes of their ears and noses. Things surveillants cannot change. And shoes. They never change shoes.

Three hours after climbing through half of Helsinki, and seeing ARCHIE—finally—with the duffel in his right hand (you’re clean), Nate was confident he was black. The modest country restaurant was owned by an Afghan family. Nate entered the small whitewashed dining room decorated with rugs on the wall and colored cushions on the chairs. Each table had a candle. A dial radio on a shelf played softly. The place was deserted, only one other couple—young Finns—at a corner table. A wonderful smell of warm spices and stewed lamb came from the kitchen. Nate was seated at a corner table facing the front window. In two minutes ARCHIE and VERONICA walked arm in arm by the window, looking straight ahead. VERONICA flicked the side of her nose with a finger. All-clear signal. ARCHIE thought it idiotic but she was implacable. He looked at her and rolled his eyes, then they disappeared.

A minute later, Dominika pushed through the door, saw Nate, and walked to the table. Cool, confident, composed. He held her chair but she shrugged her coat off by herself when he made to help her. Two glasses of wine came. Nate’s bad knee was throbbing from when he had rapped it on a fence post an hour ago. His left hand was scraped after a controlled slide down the rail embankment. Dominika’s jacket sleeve had a rip at the shoulder from when she had caught it on a corner of the Dumpster behind her house. A woolen sock and shoe were wet. She had gone ankle-deep in a slushy puddle crossing the street after getting off the train at Pihlajisto.

“I’m glad you were able to find the place,” said Nate. “It’s a little out-of-the-way, but a friend said the food was excellent.” He looked at the light on her hair. “I hope it wasn’t too far to come.”

“It was an easy trip, there was hardly anyone on the train,” said Dominika.

If you only knew, thought Nate. “I hope you like the restaurant. Have you tried Afghan food?”

“No, but there are several Afghan restaurants in Moscow. They are supposed to be good.” His halo was rich and full, and Dominika thought of her father.

“Because, you know, I worried about inviting you to an Afghan place, I worried you would think I was being provocative,” said Nate, smiling. He wanted to turn the corner, get her to relax.

“I do not think you are provocative. You are an American, you cannot help yourself. I am beginning to understand you, perhaps a little.” She dipped a piece of hot flatbread into a little bowl of chickpea paste drizzled with oil.

“As long as you can forgive me for being an American . . .” Nate said.

“I forgive you,” said Dominika, looking straight at him. Mona Lisa smile and another bite of bread.

“Then I’m happy,” said Nate, leaning on his elbows, watching her. “What about you, are you happy?”

“What an odd question,” said Dominika.

“No, not right now, I mean are you happy generally, with your life?” said Nate.

“Yes,” she said.

“It’s just that sometimes you seem so serious . . . sad, even. I know your father died several years ago, I know you were close.” Dominika had mentioned her father to Nate.

Dominika swallowed; she didn’t want to talk about this, about herself. “My father was a wonderful man, a university professor, kind and generous.”

“What did he think about the changes in Russia? Was he glad to see the Soviet Union disappear?”

“Yes, of course, as we all did, I mean welcome the changes. He was a Russian patriot.” She took another sip of wine, wiggled her wet toes in her shoe. “But what about you, Neyt?” She wasn’t going to let him hijack the conversation. “What about your father? You told me you are from a big family, but what is your father like? Are you close?”

Nate took a breath. They were going back and forth, trading question for question.

A week ago, Nate had confided to Gable that he felt he was going nowhere with the Russian girl. She was too tight, too guarded, he couldn’t see that he was making any dent in her armor. “Whattya expect?” said Gable. “You want to bang her right away? She’s young and nervous, a little Russian-nutso, she doesn’t have fucking supervisors as sensitive and helpful as you got.” Nate noticed for the first time that Gable had a 1971 Laotian calendar on his office wall. “Throw her some bones, show some petticoat. Just don’t bullshit her, see if she’ll relax.”

“My father is a lawyer,” said Nate. “He is very successful, owns his own practice. He is influential in the law and politics. He is close to my two older brothers, both work with my father. The law firm has been in my family for four generations.”

Close to his older brothers, she thought. Dominika went straight at the question. “And why did you not go into the law with your father? You could be a rich man. Don’t all Americans want to be rich?”

“Where did you get that impression? I don’t know, I suppose I always wanted to go on my own, to be independent. Diplomacy appealed to me, and I like to travel. So I thought I would try something else first.”

“But your father, was he disappointed that you did not follow your brothers?” Dominika asked.

“Sure, I suppose so,” said Nate. “But maybe I was getting away from people always telling me what to do. You know what I mean?”

Images flashed behind Dominika’s eyelids. Ballet, Ustinov, Sparrow School, Uncle Vanya. “But is it enough to have just run away from your family? Don’t you have to accomplish something in the bargain?” She was going to press him, she decided.

“Running away is not exactly how I would describe it,” said Nate, a little nettled. “I have a career, I’m contributing to my country.” He saw Gondorf’s face floating above the table.

“Of course,” said Dominika. “But how exactly do you contribute?” She took a sip of wine.

“Lots of ways,” said Nate.

“Give me an example,” said Dominika.

Well, as an example, I handle the CIA’s best asset, a high-level penetration of your frigging monolithic service, to thwart the worldwide evil designs of the Russian Federation and your lupine president for life, he thought. “I’ve been doing some interesting economic work lately, working on timber exports from Finland,” he said.

“It sounds interesting,” Dominika said, blinking at him. “I thought you were going to talk to me about world peace.” Nate looked up at her. The purple mantle behind his head and shoulders blazed.

“I would, if I thought Russians knew what world peace was.” He looked around the little dining room. “With Afghanistan and all.”

Dominika took another sip of wine. “Next time I will take you to a Vietnamese restaurant I know,” she said. They sat there looking at each other, neither willing to look away. What the fuck is going on? Nate thought. She had gotten under his skin a little. He remembered that VERONICA thought she didn’t have a job to do. Was she working him? Her blue eyes were steady across the table.

“It’s all right,” Dominika said, reading his thoughts. “Just don’t dismiss Russia all the time; we deserve some respect.”

Very interesting, he thought. “We’ll think back and remember this as our first fight,” he said.

Dominika bit into a piece of flatbread. “How do you say, I will cherish the memory,” she said.

Their food came. Dominika had ordered a rich lamb stew with lentils, which arrived steaming in a large bowl. A dollop of thick yogurt spread out over the top. Nate had ordered bowrani, dark caramelized pieces of sweet pumpkin in meat sauce with yogurt. It was delicious, and Nate made Dominika try a forkful. They finished their wine and ordered coffee.

“Next time I will pay the bill,” said Dominika. “We should go to Suomenlinna before it gets too warm and there are crowds.”

“I’ll let you arrange it all,” he said, and she nodded, looking at him through her eyelashes.

“You know, Nate,” said Dominika, “I think you are honest, and funny, and kind. I like having you as a friend.” Nate braced himself for what could be coming. “I hope you consider me a friend.”

She wants to be friends now, thought Nate. “Of course I do,” he said.

“Even though I am from Russia?”

“Especially since you’re from Russia.”

They sat in the fading light looking at each other, each thinking where this was leading, how each could bring the other along. Forty-five minutes later, they stood on the Metro platform—it was an aboveground station this far out. It was getting dark, cold but not freezing. Nate didn’t offer to drive her back into the city, and in any event Dominika would not have accepted. Nate wasn’t going to risk a chance sighting of Dominika in Nate’s diplomatic-plated car by another Russian from her Embassy.

The fat, glass-nosed train whizzed into the station and slowed. There was no one else on the platform, and the lighted interior of the train was empty. “Thank you for a wonderful afternoon,” said Dominika, turning toward him. Their eyes met and she shook his hand, the proper SVR gladiator. He had decided he was going to test her a little, so he held her hand, leaned forward, and kissed her on the cheek. Very charming, she thought, but she had seen somewhat more in her short career. The musical horn sounded and she stepped into the carriage unsmiling, a faint limp when she turned and waved as the doors hissed shut.

As the train picked up speed, Nate saw through the accelerating windows an old lady in a parka sitting in the next car with a basket of knitting on her lap. The train was flashing by almost too fast for Nate to see VERONICA flick the side of her nose. The platform had been deserted, so how did she manage to get on the train?

During their respective journeys back into the city both Dominika and Nate should have been cataloguing their impressions, remembering details and composing tomorrow’s contact reports in their heads. But neither of them was. Rather, Nate remembered how her cheek had felt and how she had stepped onto the train through the open doors with the slightest catch in her stride, and Dominika thought about his hands, one scraped red and raw, and how he had blinked in surprise, followed by delight, when she had thrown Vietnam back in his face.

KADDO BOWRANI—AFGHAN PUMPKIN

Deeply brown large chunks of peeled sugar pumpkin, cover liberally with sugar, and bake covered in medium oven until tender and caramelized. Serve over thick meat sauce of sautéed ground beef, diced onions, garlic, tomato sauce, and water. Garnish with sauce of drained yogurt, dill, and puréed garlic.

12

Through the open office door, Forsyth watched Nate work on the cable covering the last developmental lunch with Egorova. Nash was pushing the development now, but skeptically. It was slow going with the Russian, and Nate’s confidence was still shaky. He was desperate to log a success, but banging your head against the wall took its toll. Inevitably, the stakes were getting higher. With every contact with Egorova, Forsyth knew that Headquarters would push harder, offer outside assessment, begin asking for ops tests. If Nate brought her to recruitment, they’d insist on interviews and a polygraph. The most recent Headquarters response to Nate’s contact reports was, as Gable said, “already a fucking harbinger of things to come in the future.”

1. With receipt of this cable please confine reporting on this case to restricted handling channels. Subject ref has been encrypted GTDIVA. Please establish Station BIGOT list and relay to Hqs.

2. Headquarters continues to applaud Station and case officer’s diligence in developmental effort against DIVA. We find especially significant DIVA’s continued willingness to meet with c/o (certainly unauthorized) and to discuss personal thoughts. Urge c/o to continue to probe for professional details and determine extent subj will respond. Officer’s elicitation efforts have paid off to date. Look forward to future progress. Kudos.

3. In light ref developments, solicit updated Station ops plan and ops tests contemplated for future DIVA contact. Please advise next scheduled meeting and security measures planned. Hqs standing by to consult on possible next steps.

Forsyth knew the signs. The last line presaged interference from Headquarters if the case really started taking off. The buzzards would be circling, but a stampede of visitors wouldn’t start until the weather turned warmer, thought Forsyth. He called Nate into his office at the end of the day. “Have a seat, Nate. Your last cables on DIVA were really first-rate, objective, with good case-officer assessment,” said Forsyth.

“Thanks, Chief,” said Nate. Privately, he wasn’t so sure. He knew the growing audience who saw his cables would read them with an increasingly critical eye.

“Your tradecraft is tight, keep it that way. MARBLE’s a priority, of course, but after that make sure your pursuit of DIVA is undetectable to her embassy.” Forsyth thought for a moment. “That translator you met, what’s his name, Tishkov, he was an interesting nugget. But working two Russians in the same embassy probably is not a good idea, especially since DIVA is coming out to play. Maybe you can save Tishkov for later.”

Nate thought that if he didn’t recruit Dominika, all the Tishkovs in Helsinki wouldn’t help him. Too many expectations. And Forsyth pointed out another danger. “This case is on Headquarters’ scope now, big-time. Everyone’s nose is going to be in it. If you recruit her, all the heat-seekers will come out of the woodwork.

“Right now you have to figure out whether DIVA has the inclination to doubt her system. Is she willing to listen to you and let you lead her to make the big decision?” Forsyth sat back. “Not a bad job, sitting with a beautiful Russian, trying to convince her to spy for you. Okay, get out of here and have fun. Door’s open anytime you have a question.”

Gable took him to a little bistro owned by Greeks and made him try the scrambled eggs, fluffy and laced with onions and tomatoes. Over eggs and multiple beers that night, Gable tried to lighten Nate’s mood about the DIVA case. “Don’t try to get her in bed before you recruit her. She will correctly conclude that you fucked her to get her to sign up. Recruit her first, then you’ll be able to enjoy two of life’s singular pleasures: Running an SVR officer, and eating breakfast in bed with cunty fingers.” Gable threw back his drink and ordered two more for them.

“Golly, Marty, I feel I’m really growing under your coaching,” said Nate, rolling his eyes. “All I know is I have to get her to relax, to like me. What happens if this starts getting emotional?”

Gable looked over at him with a face. “Please. There’s no such thing as a case officer falling in love with an agent. It’s not allowed. It cannot be done. Get it out of your head. Go ahead and bang her if you must, but love?”


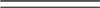


The large main room of the SVR rezidentura in the Russian Embassy in Helsinki was dotted with plain wooden desks, set up in vaguely staggered rows. None of the desks had a terminal, but most had electric typewriters with odd lacquered turquoise covers sitting on small metal typing tables. These were specially produced JAJUBAVA typewriters manufactured in Moscow under license for the SVR and FSB, and securely pouched to overseas rezidenturi, to ensure the machines were not tampered with.

The low-ceilinged room was harshly lit by overhead fluorescent tubes also imported from Moscow for the same reason. They hummed and blinked and reflected milk-white off the scratched glass desktops. Along the exterior walls, the small dormer windows—the rezidentura was on the attic level of the Russian Embassy—were secured first by exterior bars, then by bolted steel shutters, then double-paned glass, and finally by heavy gray curtains, the hems of which trailed ragged on the floor. Worn deer trails in the bare carpet ran between the desks. The shabby room smelled of stale cigarettes and cold black tea in paper cups.

At one end of the room there were two offices. One was glassed in—the classified file room—with the clerk sitting at a desk in a circle of light from a gooseneck lamp. The room was lined with tall safes, some of whose drawers were open, others closed and secured by irregular yellow wax seals, as if someone had been throwing fried eggs at them. The other office was totally private, the windowless office of Rezident Volontov.

The half dozen officers in the SVR rezidentura kept their heads down over their work as Volontov’s voice came through the closed door of his office. It was obvious that he was dressing down the newly arrived junior officer from Moscow, Egorova.

“Moscow has been hectoring me for progress reports,” yelled Volontov, leaning over his desk. “They want to see more results against the American.” The orange cloud around his head was like smoke, swirling and unsettled. He’s feeling the pressure, thought Dominika.

“I am making progress, Colonel,” said Dominika. “We have had a dozen encounters, all of them discreet. He has made no indication that he has reported the contact to his superiors, a significant development.”

“Don’t tell me what’s significant and what isn’t. I directed you, the Center directed you, to document each of the meetings with Nash. Why aren’t you drafting telegrams for my review and dispatch to Yasenevo?”

“I have drafted telegrams. You yourself told me to combine several messages in summary format. I cannot write about contacts until they actually materialize.”

Volontov slammed his desk drawer shut with a bang, and the orange smoke swirled. “You’ll do well to be respectful and leave the sarcasm for another time. Now I want you to accelerate this slow waltz with the American. You’ll remember that the ultimate goal is to elicit information that may lead to the identification of a traitor. It is urgent, paramount, that you do.”

“Yes,” said Dominika, “I understand the ultimate goal. I drafted the operational proposal in the first place. Everything is progressing.”

“That includes observing whether he seems to be preparing for an imminent operation, whether he is going on a trip, whether he is nervous, or distracted, or apprehensive.”

“Yes, Colonel, I know all these things. I am confident I will be able to discern changes in his schedule.” Dominika wasn’t sure she could; their relationship was stuck, it seemed.

Volontov pretended to look thoughtfully at Dominika. His eyes flitted from her chin to her waist and in between. “Many of the indicators we are looking for,” he said, sitting back, “are perhaps most discernible the better one knows the target. In my experience,” said Volontov, “the more intimate the relationship, the more intimate the conversation.” In your experience with Moroccan tea boys, thought Dominika. She tamped down a cold rage as she looked at the warts on Volontov’s neck.

“Very well, Colonel. I am to meet the American again next week. I will remember your guidance concerning intimacy, and I will report progress. I will propose additional meetings in the hope we can discover his work schedule. Does that meet with your approval?”

“Yes, yes, it’s fine. But do not underestimate an emotional dependence. Do you understand?” Orange haze swirling around his head, nerves, fear.

The words came out before she could stop them. “Why don’t you just come out and say it?” said Dominika, coming out of her seat. “Why don’t you just order me to get on my back? I am an officer of the Service. I serve my country. I won’t let you talk to me that way.” Her body was trembling with rage and frustration. Before the scowling Volontov could react, Dominika wheeled and walked out of his office, slamming the door behind her. If it had been any other junior officer, Volontov thought bitterly, I would have followed him into the outer office, stripped the hide off him with a birch branch, then shipped him home under escort to the Lubyanka basement. Let this one go for now, he thought. With her pedigree, it’s safer this way.

Eyes watched Dominika burst out of Volontov’s office and make her way red-faced to her desk in the corner, hard against the angle of a dormer. She sat gripping the edge of her desk, head bowed. This is some hothead, thought her colleagues. They had heard Dominika’s voice raised. Was she some kind of fool? Best to keep away from this samoubiystvo, this suicide waiting to happen, they all thought. All except one.


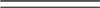


The conversation with Rezident Volontov festered inside Dominika for the five days before she was to meet Nate again, this time for dinner at a local restaurant. At night, in her apartment, she looked at her reflection in the dark glass of the window, the lights of Punavuori showing through the treetops. Who are you? she asked herself wearily. How much will you take? How she longed to wipe the eye of the beast, to puncture the desiccated self-importance of these users and falsifiers. To do so publicly was suicidal. No, better a secret revenge, undetectable, something delectable she could hold inside her, something she knew that They did not know.

Volontov was just the latest nadziratel in a procession of hoggish overseers in her life and career, but he was here and now, and she wanted to damage him, to extinguish the grimy orange halo around his warty face. She had to put her building rage into a box and calculate. The operation against Nate was critical to Volontov; he feared failing the Center. She could get back at him—at Them—by ruining it. How to do it without destroying yourself? Later that evening, she stopped with the toothbrush still in her mouth and looked at herself in the mirror. You could give the American a surprise, drop your cover, let him know you’re SVR.

Izmena. Treason, that was what it would be. Gosudarstvennaya izmena. High treason. But it would ruin Volontov’s case, put the Americans on guard, would rock Nate back on his heels. It would be interesting to see his surprise when he learned that she was an intelligence officer. He would respect her for that, he would be impressed. He would respect her.

Come on, are you insane? Have you forgotten discipline? Responsibility to the Rodina? But this was not an act against Russia. She was getting back at Them, knocking over their dominoes, not selling state secrets. She would be in control, she would determine how far was far enough. No, it was madness, and trouble, and impossible. She would have to find her satisfaction elsewhere. She brushed her hair and looked at the tapered handle of the brush, imagining it seated firmly between Volontov’s buttocks. Then she turned off the light and went into her bedroom.


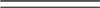


At the end of the week, Nate and Dominika were sitting in the ersatz Ristorante Villetta in Töölö at a corner table. The restaurant was classic Italian in Helsinki. A plastic canopy with Italian colors jutted out from the first floor of the apartment block in which it was located. Inside, the requisite red-and-white tablecloths and runny candles completed the décor. The weather was still cold, but winter would break soon, a few more feet of snow, then the short spring would give way to delicious summer, with the harbor full of sails and the ferries running. Dominika and Nate had arrived separately, as usual. Under her winter coat she wore a black belted knit dress and black wool stockings. The dress clung to her as she hung her coat over the back of her chair.

Nate wore a suit, but he had stripped off his necktie, and his shirt, in a blue pencil stripe, was open at the neck. He had left the Embassy two hours before and had driven up the E12 until Ruskeasuo, cut west, and come back south on surface streets, entering Töölö only after having seen ARCHIE parked on a side street with the left-hand visor down. All clear.

Nate had huddled with Gable the day before. “Get her talking about work,” Gable had said. “She’s an SVR officer, that’s her guilty secret.” Nate nodded. He squirmed, agonizing over the need for a breakthrough moment. Forsyth had praised him, Gable was nothing but encouragement, but Nate was getting antsy. He needed to turn a corner, and right now.

They chatted for a minute while looking at the improbable oversized menus. “You are quiet tonight,” said Dominika, looking at him over the top of the menu. Same majestic purple. He never changes, she thought.

“Hard day at the office,” said Nate. Keep it nonchalant. “I was late for a meeting, left figures out of a cable, my boss was not happy and told me so.”

“I cannot believe you are not excellent in your work.”

“Well, I feel better now,” Nate said, ordering two glasses of wine from the hovering waiter. “You look nice tonight.”

“Do you think so?” He was paying her a compliment. How confident he seemed.

“Yes, I do. You make me forget my boss and work and the lousy day.”

His boss. She wondered what he really thought. Dominika looked back down at the menu, but she had trouble focusing on the print.

“You are not alone, Nate. My superior also scolds.” She could feel her heartbeat in her ears. She took a swallow of wine, felt it light up her stomach.

“So we’re both in hot water. What did you do?”

“It’s not important,” Dominika said. “He is an unpleasant person, nekulturny. And ugly. He has warts.” How many rezidents in Helsinki have warts? she thought.

“What’s that, nekulturny?”

As if you don’t know, thought Dominika. “He is a peasant, no culture.”

Nate laughed. “What’s his name? Have I met him on the dip circuit?”

She had changed her mind five times in the last two days, had ultimately decided to steer clear of silly games. She looked at Nate across the table. He was munching grissini, grinning at her. No! Izmena! Treason!

“His name is Volontov, Maxim,” she said, hearing her own voice through someone else’s ears. Bozhe moi, my God, she thought, I’ve said it. She looked at Nate closely. He was scanning his menu and did not look up when she said the name. The halo around his head did not change.

“Nope, I don’t think I’ve met him.” Nate felt the hairs on his arms stand up. Holy shit. What’s she doing? She just declared herself.

“Well, you are fortunate, then,” Dominika said, still staring at him. Nate looked up from the menu. Had Dominika made a mistake and let the rezident’s name slip out? She looked back at him evenly. No. She had deliberately said it.

“Why is he so bad?” asked Nate.

“He is disgusting, an old Soviet bastard. Every day he stares at me; what is the expression in English?” Dominika kept looking at Nate evenly.

“He undresses you with his eyes,” said Nate.

“Yes,” said Dominika. No reaction from him. Had he missed what she just said? My God, had she gone too far? Then, suddenly, she knew she didn’t care. She had slid down the slope, and now was custodian of a mortally dangerous secret. Are you happy now, durak, you little fool?

“He sounds horrible . . . but I can understand why he stares.” Nate looked at Dominika and smiled a boyish grin. Jesus, he thought, this came out of the blue. Is this a signal to me? Is she being coy? He looked at her unwavering blue eyes. Her chest rose and fell under the wool dress. Her fingertips gripped the edges of the ridiculous enormous menu.

“Now you are being nekulturny,” she said. Did he already know? Was he so good, to hide his reaction?

“Well, it sounds like we both have trouble at work. We can commiserate.”

“What does ‘commiserate’ mean?” asked Dominika. Blue-eyed stare.

“Crying on each other’s shoulders,” Nate said. Purple, steady and warm.

Dominika didn’t know whether to laugh or scream. Stay professional. “Crying we can save for later. I am hungry, let’s order,” she said.


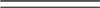


It was a Monday morning when a restricted-handling cable from Headquarters was passed to Nate, informing the Station that MARBLE had communicated via covcom that he would be arriving in Helsinki in two weeks as part of a Russian trade delegation participating in a two-day Scandinavian/Baltic economic summit. MARBLE relayed that he was using the delegation as cover for travel. He would stay under Line KR’s radar that way. He was further covered by being operational, in town to attempt to bump the senior member of the Canadian delegation, Assistant Trade Minister Anthony Trunk, who the SVR thought was a valid recruitment prospect based on the minister’s predilection for men in their early twenties.

A senior Canadian official and a pidor, to boot. The Americas Department had primacy, and MARBLE was the logical candidate to travel to Helsinki to sniff at Trunk’s cologne-scented personage. The trip was approved by the Center. As MARBLE knew would happen, instructions were issued to exclude the Helsinki rezidentura from both the conference and the operation. MARBLE had subsequently signaled in his satellite burst transmission that he would be able to meet with CIA handlers late at night after the daily sessions and celebratory dinners concluded. Risky, but possible.

A Headquarters Russia analyst would arrive two days before the start of the conference to help prepare current intelligence requirements for the meetings. A long list of follow-up questions generated by MARBLE’s previous intelligence reports was cabled to Station. At the bottom of the list, as always, the softly phrased counterintelligence questions: Do you have knowledge of any moles in the US government? Are you aware of the compromise of any US classified material? Do you know of any intelligence operations being directed against US persons or systems? Mild, opened-ended questions designed to open the furnace door and look inside.

They went down the checklist. Replenishing commo gear was impossible—MARBLE would go through customs on his return from Helsinki. A universal contact plan would be updated. Forsyth vetoed the addition of two senior officers from Headquarters to participate in the debriefings. Nate was MARBLE’s handler and he would do the job.

Now there were preparations no one else could make: Nate receded into the background, went out onto the streets, dropped from sight. By night he cased dark alleys, angled walls, loading-dock stairways—Brief Encounter sites—near the neoclassical splendor of the Kämp Hotel, where the summit would be held and delegates housed. He wandered past cafés, restaurants, the City and Sculpture Museums, pacing distances, measuring angles, determining flow and screening—these would be the Brush Pass sites—all within easy walking distance of the Kämp.

Lastly, during a night of driving rain with sheets of water pouring off the monoliths on the façade of the train terminal, Nate went up the side steps and, just inside the doors, felt the hand, then the heavy weight of the hotel key in his pocket. A thin-faced man, a nonofficial cover officer, an NOC from Europe, had taken a room at the Hotel GLO for a week with a throwaway alias. Every night during the conference, Nate would wait in the hotel room to meet MARBLE when he could get away, wait for the minute scratch at the door, wait to begin the long conversations in the overheated room with the shades down and the television turned up, into the early morning hours, while the city slept and the changing traffic lights reflected endlessly off the wet, empty streets. By the time MARBLE stepped off the plane in Helsinki, the Station was prepared to spend as much time as securely possible with him, without remotely showing an American hair on the street.


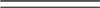


It was early evening, after work, and Dominika stood by a window on the mezzanine level of the Torni Hotel across from the swimming pool, waiting for Nate to show. They swam together now at least three days a week, but Nate had not been at the pool for six days straight. Strange, she thought, feeling a little jilted. A week ago, on a windy spring Sunday, they had met for coffee at the Carusel Café on the water in Ullanlinna. There was a growing forest of swaying rigging in the harbor as halyards clanked against aluminum masts and clouds moved across a rare blue sky.

Dominika had taken a bus, then the Metro, and finally two taxis to get to the marina. She argued with herself as she walked along the Havsstranden, but in the end had dabbed a little perfume behind her ears. He came on foot, walking across the road, and there was a spring to his step. Nate was his usual charming self, but there was something else. His purple halo was hazy, faded. He was distracted, something was on his mind. When previously they would have spent four, five, six hours together, Nate after an hour said he had another commitment—it was unexpected work, nothing social, he assured her, but he had to go. They had walked a little ways together, and when Dominika suggested that next weekend they might take the ferry to Suomenlinna and spend the day exploring the old fortress, Nate said he would love to, but two weekends from now would be better.

Trees along the street were budding, they could feel the sun on their faces. At a quiet street corner they stood and faced each other. Dominika was heading home, Nate was going the other way. Dominika could feel him; he radiated nervous energy. He was waiting for something to happen, she thought. “I’m sorry I’m such a pill,” said Nate. “It’s just a lot of work. So we go to the fortress in two weeks together?”

“Of course,” she said. “I will look for you at the swimming pool. We can arrange Suomenlinna when we see each other.” She turned to cross the street. What, she asked herself, had possessed her to use perfume? Nate watched her walk away down the sidewalk of the leafy neighborhood, registering the slight hitch in her stride. Her lean dancer’s legs bunched at the calves and she swung her hands easily as she walked.

Then he thought about MARBLE’s imminent arrival. He still had to find an all-clear signal site near the Hotel GLO so MARBLE would know to come upstairs. He took off.

GREEK STRAPATSADA EGGS

In heated olive oil reduce peeled, chopped tomatoes, onions, sugar, salt, and pepper to a thick sauce. Add beaten eggs to the tomatoes and stir vigorously until eggs set into a small, fine curd. Serve with grilled country bread drizzled with olive oil.

13

It’s been too long. Where is he? What’s he doing? Does he have another target, another woman? Did he break contact because she dropped her cover? She let it go another day, standing in the Torni Hotel across from the swimming pool each evening, waiting for sight of him. She knew he wasn’t coming again tonight. This is it, this is what I was sent here to do. She fought off the image of Uncle Vanya in his office, the suety face of Volontov looking at her each day. She would have to report in the morning.

Walking to her apartment, Dominika barely registered the streets or the lights in the windows. She thought about what would happen tomorrow in the rezidentura. Her report about Nate’s weeklong no-show would be forwarded by immediate cable to the deputy director, Eyes Only. In Line KR, an urgent request to the travel office would produce a list of all Russians traveling to Scandinavia, for six months previously and six months in the future. Diplomats, businessmen, academics, students, officials, even flight crews. The list would be finite. The patient wolves in KR would start eliminating names based on age, profession, history, and, most critically, access to state secrets. The pared-down list of leading suspects might contain a dozen names or a hundred. It wouldn’t matter. The SVR would then start watching them in Moscow, covering their mail, monitoring their phones, searching apartments and dachas, dispatching informers to get close.

The search would surely extend to Helsinki, she thought. A Directorate K surveillance team might be deployed to cover Nate for two or three weeks, a month, to observe his activities. Unexpected and invisible—the Directorate K team was referred to in whispered awe—they would record their observations, then the endless watching would begin once back in Moscow. It was inevitable. At the end of the process, if the agent was indeed a Russian, he or she would be arrested, tried, and executed. The Gray Cardinals would have their way again.

Her footsteps were loud in the night air; the city was quiet. Who was Nate’s agent? she wondered. Why was he betraying Russia? Was this man or woman decent? Venal? Treacherous? Noble? Crazy? She wanted to hear his voice, watch his face. Could she ever sympathize with his motives? Could she ever justify his treason? She thought about her own pettish transgression. You rationalized that easily enough, haven’t you, zagovorshica, you great conspirator?

Dominika closed her eyes and leaned against the wall of a darkened building. Right now she was the only one who suspected—no, knew—that Nate would be meeting his agent, the mole, and she felt light-headed. What if she said nothing? What if she denied Them the knowledge and the power to win this gambit? Could she be this disloyal?

She thought of how her foot had been ruined by that tart Sonya. She remembered the green-agony scream in the shower room at the AVR. She flashed to the orange overhead light as a helpless Delon withered before the thugs, and remembered the taste of Ustinov’s blood in her mouth. And she saw Anya’s milkmaid face choked blue.

Let them wait, she decided, determination welling up inside her. This would be horribly dangerous, potentially fatal. Her resolve was fragile, exquisite, forbidden—the power she would wield over Volontov and Uncle Vanya would be real. Her mother was always telling her to control her temper, and now the icy bite in her throat was exhilarating.

She began walking again, her heels clicking on the sidewalk. There was something else, a realization that surprised her. She knew enough about the Game to know that Nate would be destroyed, his reputation obliterated, if he lost his agent. She replayed their time in Helsinki. She would not do that to him, thinking how much Nate was like her father, how much she liked him.


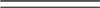


The next morning, sick to her stomach, she showed her pass at the embassy front door, walked across the courtyard, and climbed the marble steps to the attic, steps worn smooth by countless officers who had served before her. Sluzhba Vneshney Razvedki, the Foreign Intelligence Service. At the top of the stairs was the massive vault door on massive hinges, then the day door with the cipher lock, then the privacy wire gate with the electric keypad. She put her purse down on her desk, nodded to a colleague. Volontov stood at his office door, beckoning.

Dominika stood in front of his desk, unable to take her eyes away from his doughy hands. “Any developments to report, Corporal?” asked Volontov. He was cleaning his nails with a letter opener. Her heart was racing and the pounding in her head would not stop. Did it show? Did he know something? She heard her voice in her head, as if someone else in the room were speaking.

“Colonel, I have discovered that the American seems to favor museums,” said Dominika. Her voice sounded wooden. “I have invited him to the Kiasma art gallery soon. I plan to have dinner afterward . . . in my apartment.” What was she saying? The very thing Volontov wanted to hear. Volontov looked up from his manicure, grunted, then stared at her breasts.

“It’s about time. Make sure you entertain him so he will want to visit you again,” he said. “You haven’t seen anything out of the ordinary?”

Three words—Yes, I have—and the machine would take over, her responsibility would be over. A simple sentence—He said he is busy the next two weeks—was all that would be necessary. The roaring in her ears grew louder and the edges of her vision clouded. Dominika could barely make out this hog behind his desk, wrapped in his dingy orange haze. Her throat closed and she was amazed to feel her legs tremble, knees actually knocking, quite extraordinary, and she resisted leaning against the desk, willed herself to stop. Volontov continued looking at her chest, a wing of pomaded hair sticking out from the side of his head. In the last millisecond, Dominika decided.

“There’s nothing to report at this time,” she said, heart pounding. She had stepped across the line separating being guilty of an infraction to committing treason against the State. They would find out, they would send men with ice picks to stab her to death like Trotsky. They would roll her mother into a furnace. Volontov looked at her for a moment, grunted again, and waved her out of his office. In a flash, Dominika knew he suspected nothing. She was sure of her instincts and felt the ice in her veins, tingling.

Dominika returned to her desk, sat heavily in her chair. Her hands were damp and shaking, and she looked around the room at the officers and secretaries at the other desks. All had their heads down, reading, typing, or writing. Except Marta Yelenova, sitting at a desk two across from Dominika’s. Marta was holding a cigarette, staring at her. Dominika smiled thinly and looked away.

Marta, Dominika supposed, was the closest thing she had to a friend in the Embassy. She was the senior administrative assistant in the rezidentura. They had spoken in the office occasionally, had sat next to each other during a dinner for some unknown embassy colleague. They had met one rainy Sunday for a walk along the harbor and among the fresh food stalls in Market Square. Marta was elegant, aristocratic, about fifty, with thick brown hair that she wore down to her shoulders. She had dark, prominent eyebrows over the most striking hazel eyes. Her fine mouth tended to turn up at the corners in a wry smile that hinted at an unshakably cynical view of the world. She was one of those with strong color about her head and body, a deep ruby red of passion and heat, a red as when Dominika listened to music.

Dominika thought that Marta must have been a beauty in her youth. She rounded on any man in the office who made even the slightest comment about her Junoesque figure, now a little thick around the waist, sending him scuttling for the exit. Marta was not in the least fazed by Rezident Volontov, characteristically telling him that he would get the voucher, or the accounting, or the monthly report, when she finished it. Volontov could not dent her Olympian aplomb.


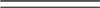


Dominika previously knew nothing about Marta’s life, but if she had, she would have been amazed to learn that Marta Yelenova had, in 1983, been conscripted by the KGB to attend State School Four—Sparrow School—in the forest outside Kazan. She was twenty years old. Her father had fought in the Great Patriotic War, then became an NKVD guard at the Leningrad headquarters, a party member, a loyal vassal of the State. Marta’s heartbreaking beauty had been noticed by a KGB major from Moscow making an inspection tour, and he arranged for her to be hired into the Service as, he originally hoped, his special assistant. Marta’s father, who knew the game but nevertheless hoped for a better life for her, said nothing, and sent his only daughter to Moscow to live with his sister and to begin work in the KGB’s Second Chief Directorate (internal security), Seventh Department (operations against tourists), Third Section (hotels and restaurants). The Seventh Department alone employed two hundred officers and sixteen hundred part-time informants and agents.

Now in Moscow, it was inevitable that Marta would be noticed by an SCD colonel, who outranked the major, and who assigned her to his staff. She was subsequently noticed by an SCD general, who outranked the colonel, and who made her his adjutant, even though Marta had no idea what an adjutant’s duties entailed. She found out when the general one afternoon forced her down on the divan in his office and put his hand under her uniform skirt. Marta hit him on the side of the head with a (typically Soviet) steel water carafe. The resultant scandal in the strangely puritanical KGB was exacerbated by the fact that the general’s wife was the sister of an alternate Politburo member. Marta was hurriedly transferred to State School Four. She had no choice. Marta was going to learn to be a Sparrow.

Marta had the rare combination of a sublime allure and a superior intellect. The former quality served to attract hapless foreign diplomats, journalists, and businessmen. The latter gave her perspective and a keen eye for making influential friends. At the end of her nearly twenty-year career, Marta was known as Koroleva Vorobey, Queen Sparrow. She had participated in scores of SCD honey traps, among which were included the recruitments by the KGB of a sex-crazed Japanese billionaire, a philandering British ambassador, and a reptilian Indian minister of defense. At the apex of Marta’s career, she was the bait in the legendary seduction, compromise, and recruitment of a cipherine, a female code clerk working in the German Embassy, the suborning of whom enabled the KGB to read German and NATO encrypted traffic for an uninterrupted seven years. It was the only time Marta worked against another woman, but the recruitment was still taught at KGB Higher School as a classic operation.

Over the years, Marta’s nonoperational romances included discreet affairs with two members of the Politburo, with a general in the First Chief Directorate, and with various sons of influential officials in the Collegium of the KGB. Many bushy-browed old bosses remembered her with affection. Thanks to these “mentors,” Marta was bulletproof and was given an SVR major’s pension on retiring from Sparrow operations by grateful if exhausted benefactors. Marta decided to enjoy life and see a little of the outside world, so she requested and was readily granted an overseas assignment, to Helsinki.


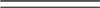


At first Marta did not know whether Dominika was SVR clerical or administrative. She certainly was very young to be assigned overseas. The last name explained much, but the fact that Dominika had no steady duties in the rezidentura, came and went as she liked, and spoke directly and privately with the rezident suggested that she was in Helsinki under a special charter. Dominika’s clothes were new, she must have been provided a wardrobe. Office gossip accelerated when it was discovered that this beautiful newcomer had been assigned a private apartment outside the block reserved for all embassy personnel. To Marta, that had a familiar ring to it.

In the rezidentura she was correct, reserved, did her work quickly and well, with an uncommon intensity. On the street, Marta saw how Dominika’s eyes flitted from people’s faces to the doors, along the sidewalk, across the street, using normal movements to mask her constant glances. When they were sitting together at a café, there was the flash of gratifying intuition, a hint of playfulness, the brilliant smile. Marta knowingly identified Dominika’s nearly unconscious use of her beauty—eyes, smile, body—in her interactions. And when they talked, Marta recognized how Dominika used techniques of conversation and elicitation.

Quite a creature, thought Marta, and in operations! Beauty, brains, tradecraft, and incandescent blue eyes. It was apparent that she knew her duty, loved her country, but there was something beneath the surface, an underground spring bubbling unseen. Pride, anger, disobedience. And something else, hard to define, a secret side, an addiction to rebellion, as if she courted risk. Marta wondered how long it would be before this young woman, with her discerning eye and natural instincts, would realize that the Center’s work was pokazukha, something done solely for effect, for show. Rezident Volontov was an extreme example of the work ethic, the type of functionary who had run the KGB and the Kremlin for the last seventy years.

They began walking out of the embassy at the end of the day, stopping at a local bar for a glass of wine and a sinful slice of caviar pie oozing crème fraîche and cheese. They spoke of family, of Moscow, of experiences. Dominika did not mention Sparrow School. Marta laughed and made Dominika laugh, and they walked arm in arm down the sidewalk at the end of the evening.

One night in a bar, after smoothly telling a disgusting German to leave them alone, Marta told Dominika her life story, about her career as a Sparrow. She was proud of having served her country; she didn’t think about the beastly years of the KGB. She was not in the slightest ashamed of who she was or what she’d done. Dominika’s lip trembled and she looked at her friend and began silently weeping. It was a long evening after that, but Marta knew everything about Dominika in the end. The assignment to pursue Nate, Uncle Vanya, Sparrow School, the Frenchman Delon, even Ustinov. The words came out of Dominika in a flood. There was no thought about elicitation or manipulation. The two women thereafter were, simply, friends.

Evening after evening, cool and collected, Marta listened and thought, My, how the vlastiteli, the bosses, have wrung quite a lot out of this girl in such a short time. But Marta saw strength in Dominika, and something else. Marta suspected Dominika’s exposure to the easygoing young American CIA officer was creating deeper reactions as well. To have said so would have been to imply that Dominika could not operate correctly, so Marta said nothing.

“I don’t know,” said Dominika. “He’s arrogant, he’s facetious, he doesn’t like Russia, or at least he doesn’t give us much credit. Uncle Vanya believes he is a desperate operative.”

“He sounds unpleasant,” said Marta. “But it should make it easier to work against him—even to sleep with him—to get what you want.” She lit a cigarette and looked at Dominika leaning back in the booth. They were on their third glass of wine.

“Not so much unpleasant as frustrating. But nice.” She sighed. “I am supposed to tell Volontov when I think he’s operational, distracted. They want to catch him with his agent.” Dominika was feeling the wine.

“And do you know him well enough to do that?” asked Marta. “Will you be able to know?”

Dominika brushed a lock of hair off her forehead. “I think I already have—I mean, I already do,” she said.

“And you ran right in and reported to Colonel Volontov,” said Marta. She already knew what was happening.

“Not exactly,” said Dominika. “I told him I would keep watching.”

“And you positively did not report that you suspected your young American was becoming busy.”

“He’s not my ‘young American,’ ” said Dominika, her eyes closed.

“But you suspect it’s so, and Volontov asked you outright, and you didn’t say a thing, correct?” asked Marta, leaning toward Dominika. “Open your eyes, look at me.”

She opened her eyes. “Correct. I didn’t say anything.” She closed her eyes.

Marta sipped her wine, noting with some detachment that Dominika not only had committed treason against the State—saying treason against the Duma sounded ridiculous—by not reporting and lying about it, but also had that evening made Marta likewise guilty of treason for having heard about the crime. She reached out and squeezed Dominika’s hand. “You must be careful,” she said.

Marta had devoted her life to the State, had for years ignored its excesses and personally contributed to the downfall of men whose only sin was to succumb to the pleasures of the flesh. But inside, she had long since broken with the bastards. She knew what a situation Dominika was in. The beasts, she thought, they will utterly empty this beautiful, intelligent girl, then cast her aside. And if what she was doing even remotely thwarted Vladimir Putin, it would be mortally dangerous. Dominika’s knowledge was like a knotted bag of snakes—safe for the moment, but don’t bang it against the wall.


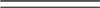


MARBLE’s short visit to Helsinki was a triumph in multiple ways. First, MARBLE himself met and made significant progress with Trade Minister Trunk, thus incontrovertibly establishing the continuing need to pursue the flamboyant Canadian. Second, three nights of midnight-to-dawn meetings in the Hotel GLO with Nate had already produced eight highly graded intelligence reports (with notes for a possible thirty-seven more) on SVR operations in Europe and North America. Third, MARBLE provided the name of an assistant commissioner in the RCMP’s Strategic Policy and Planning Directorate who was meeting a Russian illegal (whose day job was as a dancer at the Bare Fax in Ottawa). Last, the old agent repeated from memory—he did not normally have access to China reporting—the gist of three superb SVR reports from Beijing detailing the power struggle still smoldering within the Politburo Standing Committee fully two years after the removal of Bo Xilai in early 2012. MARBLE’s “source comments” regarding President Putin’s interest—“significantly obsessive,” he called it—in Chinese Communist Party disunity were highly valued by analysts.

That was just the positive intelligence from MARBLE. The most explosive item was a hint MARBLE had picked up that there was a “Director’s Case” being run out of the fourth floor of Yasenevo, an asset in the pay of Russia so important and so sensitive that SVR leadership were running the case exclusively. To CIA counterintelligence, this special handling could only mean a megamole. Some government, some country, had a big problem, was gravely penetrated, and they all looked at one another and wondered if it was in Washington. That intel tidbit was compartmented from the rest of MARBLE’s reporting and handled separately.

No one had to tell the old spook what to do about this. He told them what he would do. He knew how to pull the string with his fingertips, how to be the spider sitting on the web, waiting for the tremble of the radius threads. He would collect—softly, softly—more information when he could. Meanwhile, the words SVR mole, Director’s Case, and Yasenevo went on the office whiteboards of a dozen counterintelligence analysts in CIA headquarters. They were good at waiting, they would wait for months, even years, to fit more pieces into the mosaic.

The last evening, MARBLE told Nate that Anthony Trunk would within the next six months attend an economic conference in Rome as well as the UN General Assembly in New York, providing two future opportunities for MARBLE to travel out of Russia with plausible cover provided by the SVR’s pursuit of Trunk.

Headquarters was pleased with this round of MARBLE meetings and with Nate’s performance. A bonus was deposited in MARBLE’s secret fund account, and Nate was awarded a Quality Step Increase amounting to a salary bump of $153 per pay period, after taxes. “Wicked good,” said Gable when he heard about Nate’s QSI. “One hundred and fifty-three dollars. Just as long as they don’t fucking devalue your contribution. You realize you also get a voucher for six free car washes?”


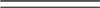


At the end of the meeting series, before MARBLE returned to Moscow, Nate pushed gently about the general’s security. MARBLE rather nonchalantly acknowledged that since he and Nate had narrowly missed being rolled up on the snowy Moscow street that one night—it seemed like a hundred years ago—there was a serious mole hunt going on inside SVR headquarters in Yasenevo. His old comrade First Deputy Director Egorov was convinced someone senior in the Russian service was spying for the CIA. “In other words . . . me,” he said with a laugh. Nate’s concern showed on his face.

“Look,” said MARBLE, “I am used to the risk. I know how my Service works. I know how that zhulik, that old fraud Egorov, thinks and operates. There’s no cause for alarm.” He thought to himself about fourteen years as Langley’s agent, of wakeful nights listening to footfalls in the stairwell, or feeling the tightness in his chest when called back to Moscow “for consultations.” He remembered the inexpressible wave of relief on seeing a full conference room after being summoned to a meeting. Others before him had entered an empty meeting room with the ubijca, the thugs, waiting behind the door.

The old man humored his intense young handler, and they reviewed their contingency plans for the biggest high-wire act in denied-area operations. Exfiltration. Smuggling someone to freedom. From inside Moscow, under hot pursuit, with family or with the mistress, curled tight in a car trunk or brazening it through passport control. After forty minutes MARBLE held up his hand. “Nathaniel, enough for tonight, I think. You are very thorough.” Nate blushed in self-conscious embarrassment and they said good night.


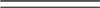


Now MARBLE was safely home and Nate was pleased to read effusive praise from Headquarters for the secure and productive meeting series with the agent. A cable had characterized Nate’s reporting as “well received at the highest levels,” cablese for the White House and the NSC.

Forsyth tapped him on the shoulder for a good job, and Gable bought him a beer. “All the kudos you’re getting, no one’s thinking about the agent,” said Gable. “It’s your responsibility never to forget him. You got that?”

The glow faded with Nate’s pressing problem. Dominika. Where was the case going? What did her admission that she worked for the rezident mean? If there wasn’t some progress soon, there would be complaints from Headquarters.

“Screw Headquarters,” said Gable, starting on another beer. “Just take it easy for a couple of weeks, bask in the glow of your recent scary-good performance, then we’ll decide what you can do next.”

Nate knew Gable well enough by now. “You really mean, Get out of this chair and hit the street before I kick you out the front door, don’t you?” said Nate.

“Yes, yes, in fact I do,” said Gable. “Go to the swimming pool. Find your SVR corporal. Bring her flowers. Tell her you were miserable without her, that you missed seeing her. Take her to dinner.”

“To tell you the truth, Marty, I did sort of miss seeing her,” said Nate, looking down at the carpet. He looked back up at Gable.

“Jesus wept,” said Gable, and walked out.

CAVIAR TORTE

Blend sautéed shallots, crème fraîche, and grated Neufchâtel cheese and pour mixture into a springform pan. Sprinkle with chopped boiled eggs. Spread a thin layer of small-gauge caviar (Ossetra or Sevruga) on top of torte and chill. Unmold and spread on blinis or toast points.

14

Marta conspired with Dominika in little ways. She helped her pad attendance and work logs to show activity, and together they talked out how Dominika could write contact reports that showed hopeful progress, while at the same time being sufficiently anodyne not to rouse the sleeping bear in the Center. She wrote of pleasant but inconclusive sessions with the American at a museum, a lunch, a coffee, veiled references to his almost languid unresponsiveness. “It makes him sound horrid,” said Dominika, “and it makes me sound horrible too. We’ll be two old maids, you and I!”

“You think so?” said Marta, lighting a cigarette. “Perhaps we’ll be like the two girls buying sausages. The butcher has no change, so he gives them an extra sausage. ‘What are we going to do with the third sausage?’ whispers one girl. ‘Quiet,’ her friend says. ‘We’ll eat that one.’ ” Dominika started laughing.

Volontov was constantly hovering, feeling the pressure from Moscow and passing it downhill. He saw the obvious friendship between the two women, the aging former Sparrow and her young friend. And Egorova was clearly abetted by Yelenova. Yelenova’s already chronic lack of respect and compliance was increasing and becoming more apparent daily.

It was a stormy day with sheeting rain coming in waves from the south, from Estonia. Dominika was out of the embassy when Volontov called Marta into his office. Marta sat without being bidden, squared her shoulders. “You wanted to see me, Colonel?”

Volontov looked at Marta without speaking. His eyes traveled from her legs to her face. Marta looked him in the eye. “What is it you wish, Colonel?” Marta repeated.

“I have been noticing your close friendship with Corporal Egorova,” said Volontov. “You and she seem to be spending a fair amount of time together.”

“Is there anything wrong with that, Colonel?” asked Marta. She lit a cigarette, lifted her head, and blew the smoke toward the ceiling.

Volontov watched her like a farm boy. “What have you been saying to Egorova?”

“I’m not sure I understand the question, Colonel,” said Marta. “We go out for a glass of wine, we talk about family, travel, food.”

“What else do you talk about?” Volontov asked. “Do you speak about men, about boyfriends?” The light from the fluorescent tubes in his office reflected from the sheen of the lapels of his Bulgarian suit.

“Excuse me, Colonel,” said Marta, “what is the reason for these personal questions?”

“Sookin syn!” Volontov slapped his hand on his desk. “I don’t have to give you a reason,” he bellowed. “Whatever you have been saying to Egorova, I want it to stop. Your well-known cynical attitude and jaded views are affecting her. Her productivity has dropped. She is falling behind in her assigned work. Her written reports are unsatisfactory. Leave her alone. Or I will take measures.”

Accustomed to and unaffected by the phlegmy bellows of Soviet officialdom, Marta calmly leaned forward and stubbed her cigarette in the ashtray on his desk. His eyes flicked down to the opening in her blouse. She put her hands on the edge of his desk and leaned farther to give him an even better look. “Colonel,” Marta said, “I must tell you something. You are repulsive. It is you who should leave Egorova alone. Don’t sully her with your disgusting manner. She has done nothing wrong.”

“Who do you think you’re talking to?” yelled Volontov. “You’re nothing but an overripe whore, blyadischa! I can have you sent home tonight, trussed up like the sow you are. You’ll be manning a regional travel office in Magnitogorsk, where you can check travel permits all day and suck toothless Metallurg hockey players all night.”

“Ah, yes, Colonel, all the familiar threats,” said Marta. She knew this species of toad, this kind of coward. “But what about this threat, Colonel? I’ll go over your head. I’ll create so much trouble for you in Moscow that it will be you on your knees in Magnitogorsk. Vanya Egorov will not be pleased to hear that your rezidentura is a svalka, a trash heap, and your accomplishments are nonexistent. He will be quite interested to hear how you leer at his niece and dream of putting your face between her legs. Bastard. Mudak.”

This was colossal insubordination. This was treason. Volontov stood behind his desk and screamed at Marta. “Pack your belongings. I want you out of here by tomorrow night. I don’t care how: train, boat, plane. If you’re not gone by tomorrow night—”

“Zhopa! Asshole!” said Marta, who turned her back on Volontov and walked toward his door. Trembling with rage, Volontov tore open the desk drawer, scrabbled around in it, and brought out a small Makarov automatic, the pistol he’d had with him all his career. He had never fired it in the field, never fired it in anger. Now, with shaking hand, he racked the slide back to chamber a round. At the door, Marta heard the sound and turned. Volontov’s pistol was raised, pointing directly at her. “I’m not Dimitri Ustinov, Colonel Volontov. You and your kind cannot destroy every single thing you don’t control.” Marta’s heart was beating; she didn’t know if Volontov would pull the trigger.

Ustinov? The murdered oligarch? Butchered in his penthouse, buckets of blood, rumored Mafia vendetta? Volontov had no idea what this bitch was talking about, but the 1950s-vintage Soviet vacuum tubes in his head heated up. His water-bug instincts told him there was something lurking under the surface, perhaps something very important. He lowered his pistol. Marta turned the knob on his office door and walked out. Colleagues were gathered in the hallway; they had heard the shouting.

Inside his office, Volontov smoked a cigarette and tried to calm down. He reached for the secure, crème-colored telephone labeled VCh for vysokochastoty, high-frequency. “Get me Moscow,” he said to the operator. After a thirty-second wait he was speaking to First Deputy Director Egorov. Two minutes later he had been given instructions. These included: Ignore what Yelenova had said to him, repeat it to absolutely no one, and do nothing more. Volontov was about to protest that this sort of insubordination would undermine his authority. Over the scratchy line, Egorov told him to pay attention.

“Yest’ chelovek, yest’ problema. Nyet cheloveka, nyet problemy,” said Egorov. A chill ran through Volontov. He knew that one by heart. One of Comrade Stalin’s aphorisms: If there is a person, there is a problem. If there is no person, then there is no problem.


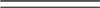


Nate and Dominika sat on the couch in his apartment. Lights from the harbor filtered through the window and the bass note of a ship’s horn came from the darkness beyond the islands in the bay. A sweep team had checked Nate’s apartment so he could invite Dominika for dinner. Neither knew, at this stage, who had the operational advantage. Neither knew where his or her respective developmental efforts would lead. Neither fully understood the stakes of the Game. All either of them knew was that they looked forward to seeing each other. Nate’s little living room was dimly lit with two lamps. Music played softly, Beny Moré ballads.

Nate had cooked for Dominika, vitello picatta, veal scaloppine with lemon caper sauce. Dominika had stood leaning against the kitchen table watching while Nate lightly sautéed the wafer-thin medallions of meat in oil and butter. She moved closer to the stove as he poured wine and lemon juice into the pan to deglaze the fond, added thin lemon slices and capers, then pieces of cold butter. He put the pieces of veal back into the pan to warm them. They ate dinner on the couch, the plates on their laps. Dominika finished her wine and poured herself another glass.

They had picked up their relationship after the break of several weeks ago, had spent time together since then. On a chilly Sunday, walking around the old fortress, they had started the familiar argument.

“You lived in Moscow for a year, for goodness’ sake,” Dominika said. “But you don’t know Russians. Your view is black-and-white. You haven’t learned anything.”

Nate smiled and offered his hand to help her over a grassy parapet, part of the castle walls. Dominika did not take it and trudged up the mound on her own. “Look, nationalism is fine. You’ve got a lot to be proud of,” said Nate. “But the world is not populated with your enemies. Russia should concentrate on helping her own people.”

“We do very well, thank you,” said Dominika.

They continued squabbling in the apartment after dinner. “I’m just saying that Russia hasn’t fundamentally changed from the old days, that she is missing the great opportunities before her. That the familiar bad habits are all back.”

“What bad habits?” asked Dominika. She was drying a plate at the sink.

“Corruption, repression, imprisonment. Soviet behavior is the default, it’s strangling democracy in Russia.”

“You almost seem pleased to repeat the list,” said Dominika. “I suppose there is none of that in America?”

“Sure we have our problems, but we don’t let dissidents die in jail, or murder political opponents.” Nate saw Dominika’s face change. “There are people who value humanity, who believe that all humans have rights, it doesn’t matter what country they’re from. And then there are people who don’t seem to care about their fellow man, who have no conscience, like some of the people in the former Soviet Union, in the old KGB. Some of them never went away.”

Dominika could not believe they were having this conversation. For the first part, it was insulting to sit here being lectured by this young American. For the second part, Dominika knew that much of what he said was correct, but to admit it would be unthinkable. “Now you’re an expert,” she said, putting the plate down and picking up another, “on the KGB.”

“Well, I knew one or two of them,” said Nate.

Dominika continued drying the plate without pausing. “You knew KGB men? Impossible. Who were they?” she asked. And what will you do if he tells you? she thought.

“Nobody you would know. But in comparison I greatly prefer knowing SVR officers. They’re much nicer.” That grin again, deep purple.

Dominika did not react, but looked at her watch and said it was getting late. Huffy. Nate helped her into her coat, pulling her hair free of the collar. Dominika felt his finger brush her neck as he did so. “Thank you for dinner, Nate,” she said. She had her temper in a box, just barely.

“May I walk you home?” he asked.

“No, thank you,” said Dominika. She walked to the front door and turned, offering her hand, but he was right behind her and he put his hand on her shoulder and kissed her lightly on the mouth. “Good night,” she said, and went out into the hallway, her lips tingling.

NATE’S VEAL PICATTA

Pound small medallions of veal paper-thin. Season and quickly sauté in butter and oil until golden. Remove and cover. Deglaze pan with dry white wine and lemon juice, boil to reduce. Lower heat, add thin lemon slices, capers, and cold butter. Gently simmer to a thick reduction (do not bring back to a boil). Return medallions to sauce to warm.

15

Past midnight now, the Helsinki snow had given way to the rains of emergent spring, which spattered on the pavement, dripped off the bare limbs of the trees, and rattled against the windows. Nate tossed in his bed. Twelve blocks away, Dominika lay awake hearing the rain and felt the lingering tingle of Nate’s good-night kiss on her lips. She was glad she had saved him, and she would do it again, she decided.

Thank God for Marta. Not only had her friend’s support helped her with the decision, but also Marta’s wry commentary on life had crystallized her thinking, especially about keeping a secret from the Service. Marta did not believe in blind devotion. She told Dominika not to be a tricoteuse, to be true to herself, to owe allegiance first to herself, then, if there was room, to Russia. Dominika tossed in her bed.

Five blocks to the east, Marta Yelenova eased open her apartment door in the residence block reserved for Russian Embassy employees. Cooking smells of boiled beef and cabbage were heavy in the corridor and reminded her of apartment blocks in Moscow. She shook the rain off her overcoat and hung it on a hook next to the door.

Her apartment was small, a single room with a separate kitchen nook, beyond which was the tiny bathroom. The apartment had been used by generations of Russian Embassy employees and was dingy and worn, the furniture scarred and wobbly. Marta stumbled as she took off her wet shoes. She giggled to herself. She was tipsy after a long night alone in a small café. At some point during the evening she had ordered pytt i panna, a popular Scandinavian hash of beef, onion, and potatoes. She had left the bar and walked home in the rain. It had been some time since her blowup with Volontov, and the expected recall to Moscow, the reprimands, the firing from the Service had not come. The rezident studiously ignored her, but absolutely nothing had happened.

Marta saw that Dominika in the last days was trying to schedule more frequent operational meetings with Nathaniel, primarily because that was what kept Volontov happy, but also, Marta observed, because Dominika looked forward to contact with the young American. Volontov had called her into his office as well, and Dominika returned to her desk, giving Marta a wink. “He was very calm, almost apologetic,” said Dominika over wine after work. “He encouraged me to keep working, to try to pick up the pace if I could.”

“I don’t trust that jellyfish,” said Marta. “My advice, Domi, is to keep telling them you’re working very diligently, progress is slow, but you’re encouraged by developments. They all want to report success to the Center, so Volontov will keep up a good face.” Later that night, walking home, she tipsily told Dominika that if either of them had any sense, they’d both defect. Scandalous.

Marta went into her bedroom. She sat heavily on her bed, peeled off her damp clothes, and let them fall in a heap to the floor. She put on a short silk pajama shirt. It was from India, light beige, billowing, and embroidered with green and gold thread. Matching green knotted buttons ran from throat to hem. She stood in front of a wall mirror with its cracked corner and looked at herself. The shirt had been a present from a GRU general who had been posted to the Soviet Embassy in New Delhi. He had met Marta during the honey-trap operation against the Indian defense minister. They had had a torrid affair for eight weeks, but in the end he stopped it. Having the Queen Sparrow as a Moscow diversion was one thing, he said, but settling down with “someone like you” was another.

Someone like me, Marta thought, looking at her reflection. She opened the nightshirt and looked at her naked body in the mirror. Several years past fifty and she was still holding together, she thought. A little more waistline, some lines around her eyes, but her breasts had not completely fallen, and, turning slightly and holding the material aside, she saw that her backside still had the swoop and curve that had been, in large part, responsible for making the young French intel officer in 1984 forget his duty and spend a month of Sundays in a Leningrad hotel room with her. She thought about him sometimes, for no reason.

Marta padded barefoot into the kitchen to draw a glass of water. It would clear her head so she could sleep. She returned to the bedroom and felt an arm snake around her neck from behind. She had heard nothing. The man held tight against her throat. She grabbed his arm with both hands to relieve the pressure. The person behind her didn’t feel big; in fact, he felt somewhat thin. The breath on her neck was steady; he wasn’t scared. He did not overly tighten his grip on her throat—he was just holding her. Marta thought maybe a pervert, a molestation? She got ready to reach behind to twist his testicles off.

It wasn’t until he had frog-marched her sideways to stand in front of the mirror that she knew this wasn’t a Finnish delivery boy with a wet spot on the front of his apron. She smelled ammonia and sweat. Then something else. A voice in her ear like a beetle walking across rice paper. One word in Russian. “Molchat.” Silence. In a horrified flash she knew. It was Them.

There was a creature looking out over her shoulder into the mirror. Their eyes met. More specifically, her eyes met his single eye. The other, a chalky marble in its socket, stared obliquely. In the dim light of her bedroom, Marta could not see his body, just his disembodied arm and pocked, scarred face behind her, floating over her shoulder. His voice started scuttling again.

“Good evening, Comrade Yelenova. May I call you Marta? Or perhaps ‘my little Sparrow’?” Marta’s nightshirt was slightly open. The gold highlights in the shirt were vibrating, picking up the trembling in Marta’s body. Her pubic delta was visible between the folds of the slightly opened shirt. The monster pulled her a little straighter, Marta was lifted to her toes. “My little Sparrow,” the man whispered. “What have you been doing?” He moved her, still up on her toes, a step closer to the mirror. Marta looked in the mirror and saw her own terrified eyes looking back at her.

“Will you share your bed with me, little Sparrow?” the man said. “I have come a long way.” A second hand, black-gloved and holding a two-foot-long knife with a curved handle, came from behind and crossed her body. The man flicked one side of her shirt farther open with the tip of the knife. Her breast was heaving in fright. The floating head behind her smiled, tucked his chin into the crook of her neck, and tightened his grip. Marta’s vision of herself in the mirror was going gray at the edges. A rushing noise in her head grew louder. She heard the devil say, “Pokazat gde raki zimuyut.” I will show you where the crayfish spend winter. She knew this phrase, its deadly portent. Then the rushing noise got louder and she passed out.

Marta regained consciousness quickly, like a surfacing rush, coming back up to the light. She was naked on her back, on her narrow, bitter little bed. She felt the pull of tape over her mouth. Her hands were tied behind her, the knots on her wrists dug into her back. The familiar bedside lamp with its faded, gauzy pink shade cast a mild light on the bedspread. Her legs were tied together at the ankles. She pulled and tested each knot, but there was no give.

She heard a noise, turned her head, and her heart stopped. It was the most terrifying thing she had ever seen. The man was wearing her India shirt. He was dancing around the little room, rocking his body forward and back. The knife was in his hand, and he occasionally twirled it above his head as he pirouetted. Marta began weeping silently.
[truncated: 543,222 more chars]
