# Supplementary material
Source: ML conference proceedings conference paper supplement (https://openreview.net/forum?id=Sxi6gBtJcI)
Supplement: supplementary_material [file refined_screenplay_1.docx]

The refined_Sreenplay Act 1 of 'Fight_Club_Novel_docx':

[Act 1-Scene 1]:

EXT. PARKER-MORRIS BUILDING - ROOFTOP - CLOUDY DAY

The PROTAGONIST stands at the edge of the rooftop, the wind ruffles his hair as he stares down at the bustling city below. Snowflakes drift quietly through the air around him, one landing softly on his cheek, a brief flicker of calm amidst the chaos. Clouds loom overhead, casting shadows over the concrete jungle that seems so distant yet omnipresent.

The PROTAGONIST (30s) looks pale and shaken. His hands tremble slightly as he holds a gun pressed against his mouth, the cold metal an uncomfortable reminder of the moment.

TYLER DURDEN (30s), a darkly charismatic figure, stands close by, a sly grin etched on his features. His energy is electric, intoxicating.

TYLER

"The first step to eternal life is you have to die, right?"

The PROTAGONIST swallows hard, his eyes darting nervously over the edge of the building.

PROTAGONIST

"Tyler, this isn’t fun. This is..."

TYLER

(cutting him off)

"Fear. It’s just fear. Confront it."

The PROTAGONIST's breathing becomes labored as his emotions swirl. He can hear the faint hint of cheering from the crowd below.

PROTAGONIST

"But what about... what about the people down there?"

TYLER steps closer, his voice lowering conspiratorially.

TYLER

"Look closely. They’re all the same as you. Scared. Lost. Chained to their lives."

The PROTAGONIST flinches, memories of BOB (40s), from his support group, fill his thoughts. Bob's strong arms wrapping around him, the warmth of genuine comfort.

PROTAGONIST (V.O.)

(reflective)

"Bob... always told me I wasn’t alone. We’re here for each other, he said."

A brief silence envelops the rooftop. The howling wind picks up, causing the snowflakes to dance around him, blurring the lines between chaos and introspection. The sound of one snowflake landing nearby anchors his thoughts momentarily, merging with Tyler’s voice in the background.

TYLER

"You have strength in your vulnerability. Maybe you’ll become a legend."

The PROTAGONIST's grip tightens around the gun, and a flicker of doubt flashes across his face.

PROTAGONIST

"Legends die, Tyler. They disappear from the world."

The timer on TYLER's phone starts BEEPING, an ominous countdown echoing against the rooftop's surface.

TYLER

"Legends leave a mark. We will not die unnoticed."

The PROTAGONIST closes his eyes tightly, the image of Bob's supportive embrace still vivid in his mind. A tear escapes down his cheek.

PROTAGONIST

(voice trembling)

"I need to talk to someone. I want to be more than this."

TYLER’S expression shifts slightly, both fearless and understanding, pushing back against the weight of the impending countdown.

TYLER

"You think Bob would want you to end it? Stand up! Rewrite your story!"

TYLER's voice carries an intense conviction that grips the PROTAGONIST. The rooftop air thickens with tension, as the urgency of the timer leads them to the brink of an unimaginable choice.

PROTAGONIST

(a vulnerable whisper)

"I don’t want to fall into nothingness..."

Pressing the gun harder against his mouth, his fingers quiver. The timer DINGS; the moment is here.

TYLER

"You first, or you can let go. What’ll it be, my friend?"

The PROTAGONIST gulps, the conflict of emotions swirling within him. He still holds the gun, but suddenly finds himself torn between the reckless allure of chaos and the warmth he felt with Bob.

PROTAGONIST

(resolutely)

"I choose life."

He slowly removes the gun from his mouth, shaking slightly, but staring defiantly at TYLER. A moment of revelation.

TYLER

"Welcome back, soldier."

The thunder of a sudden blast echoes from below, shaking the rooftop, and shattering their moment. The PROTAGONIST looks over the edge, adrenaline racing through his veins as realization dawns.

PROTAGONIST

(panicked)

"What did you do?!"

TYLER's grin widens, the chaos below intensifying, fueling the reckless energy surrounding them.

TYLER

"We make legends, remember?"

As chaos erupts, the PROTAGONIST stands at the edge, a mix of dread and exhilaration. The storm of emotions swirls, and he stands before a decision that could redefine his life.

FADE OUT.

[Act 1-Scene 2]:

INT. KORNER MART - MIDNIGHT

The fluorescent lights flicker sporadically, casting erratic shadows across the dimly lit aisle filled with empty shelves and scattered merchandise. The hum of the refrigerator units fills the silence, interrupted only by the distant sound of a clock ticking.

At the center of the chaos stands the PROTAGONIST (30s), disheveled hair, wild eyes — a look of desperate intensity etched across his face. He holds a gun tightly in his trembling hand, aimed at RAYMOND HESSEL (early 20s), a frightened young man with wide eyes and a clammy forehead, drenched in panic.

PROTAGONIST

(voice low, intense)

Close your eyes, Raymond. Just close them.

Raymond's lips quiver, the gun mere inches from his face. He shakes his head, trying to make sense of the situation, his breath quickening.

RAYMOND

(whimpering)

Please… don’t. I haven’t done anything...

The protagonist cocks his head and steps closer, the gun steady in his grip. His shoulders tense, conveying an air of authoritative intimidation.

PROTAGONIST

(more forcefully)

That’s right. You haven't done anything! Just imagine it, all the things you want to be, the choices you could make...

He steps to the side, exposing a view of the empty store, the flickering lights reflecting the chaos in his own mind. A flash of doubt crosses his face, his hands shaking slightly, breath catching in his throat. He swallows hard, catching his breath as he struggles to maintain control.

PROTAGONIST (CONT'D)

(pausing, struggling, hands shaking)

Picture your life, Raymond. Picture it.

Raymond gulps, his eyes darting between the gun and the protagonist's face, searching for humanity behind the madness.

RAYMOND

(voice trembling)

I… I want to be a graphic designer. I want to... help people.

The protagonist's expression betrays a flicker of understanding, the weight of Raymond's desperation striking him. A bead of sweat rolls down his forehead, his grip on the gun trembling more noticeably now. He takes a shaky breath, visibly conflicted.

PROTAGONIST

(guilty but resolute, pausing)

That's right. A graphic designer. But right now, you’re staring down the barrel of this gun...

He gestures with the gun, emphasizing the gravity of the moment. The room feels smaller, the stakes higher as his breath becomes irregular, a physical manifestation of his internal struggle. **His breath quickens, hands trembling violently.**

PROTAGONIST (CONT'D)

(voice catching)

If you think about it... this is the most alive you've ever been.

Raymond's breathing becomes erratic, sweat rolling down his temple. He fights to regain his composure, eyes locking onto the protagonist’s with defiance mixed with fear.

RAYMOND

(steadying himself)

You're wrong! I don’t want to die — I want a future. Everyone deserves a shot!

The protagonist flinches at Raymond's words, the guilt flooding back with full force. He begins to shake, visibly torn between power and vulnerability, the gun wavering in his grip as tears well up in his eyes. **His breathing becomes more erratic as the tension builds.**

PROTAGONIST

(voice cracking, shaking, hands trembling)

You've got it all wrong. I want to give you a future, but this... this chaos, it’s drowning me!

He lowers the gun slightly, his body tense as he breathes heavily, struggling for composure. **His breath quickens, hands shaking more violently.**

RAYMOND

(earnestly)

You’re not a monster. You’re just... lost.

With shaking hands, the protagonist wipes away a tear streaked with frustration and regret, panting lightly as he grapples with his own emotions, visible uncertainty flooding in. **He breathes erratically, a shudder running through him, visibly shaken.**

PROTAGONIST

(torn, voice shaking, hands shaking)

Lost? Or have I just realized my power?

He raises the gun again, but this time it’s not aimed at Raymond – it’s a challenge to his own psyche. **His breathing quickens, eyes wide with desperation, the gun shaking violently.**

PROTAGONIST (CONT'D)

(voice breaking)

You ever think about what it means to live? No chains, no fears?

RAYMOND

(insistent)

To live is to embrace everything: the pain, the joy. But not like this! Please!

The protagonist stares deeply into Raymond's eyes, searching his own soul with tormented intensity. **The gun shakes in his grip, heavy with more than just violence, the weight of doubt palpable as he struggles against it.**

PROTAGONIST

(voice breaking, shaking)

What if I’m beyond saving, Raymond?

RAYMOND

(gentle but firm)

Then change the narrative! It’s not too late!

The words resonate through the protagonist, stirring something deep inside him. A moment of understanding, of clarity. The chaos swirling around them begins to recede, and his breathing steadies slightly, though still shaken.

PROTAGONIST

(resigned, whispering, trembling)

Is there hope, really?

In a moment of vulnerability, he lowers the gun, taking a shaky breath as the tension in the air thickens around them.

PROTAGONIST (CONT'D)

(trembling)

I don't want to be the man who kills you…

He finally drops the gun onto the floor, the metallic clatter echoing through the silent store like a distant gunshot. He shakes again, uncertainty flooding back in, his breath still unsteady.

RAYMOND

(breathtakingly relieved)

Thank you...

The protagonist slumps to his knees, the weight of his choice settling over him in waves, his hands still trembling at his sides.

PROTAGONIST

(voice hollow, shaking)

What... now?

RAYMOND

(breathlessly)

Now, we find our way—together.

Raymond approaches cautiously, extending a hand towards the protagonist, breaking through the final barriers of their chaotic moment.

PROTAGONIST

(looking up, shaking)

Together…

The camera pulls back, revealing the disarray of Korner Mart, an emblem of their tumultuous journey now shifting toward redemption.

FADE OUT.

[Act 1-Scene 3]:

INT. KORNER MART - MIDNIGHT

A flickering fluorescent light casts a harsh glow over the chaotic store. Empty boxes litter the floor. Distant late-night traffic echoes through the glass storefront, enhancing the desolation.

The PROTAGONIST (30s), gaunt and disheveled, stands by the abandoned checkout counter, shaken. He stares blankly, replaying the recent confrontation.

PROTAGONIST

(muttering)

What have I become?

He grips the gun between his feet, trembling as he picks it up, wrestling with his emotions.

PROTAGONIST

(catching his breath)

I can't believe this.

His knuckles whiten as he clutches the gun tightly.

PROTAGONIST

(to the gun)

Are you my savior or my ruin?

The faint TICKING of a clock echoes, each second heavy with conflict. The rustling of plastic bags pulls him into painful memories. He pauses, breathes deeply, feeling the cold steel against his palm.

PROTAGONIST

(struggling)

This isn’t me...

He closes his eyes, grappling with flashes of violence. Reluctantly, he gestures with the gun, confronting his demons.

PROTAGONIST

(desperate)

If I keep this... what will I become?

His resolve dwindles. He steers his breath, the weight of the gun deepening his turmoil. The clock TICKS again.

PROTAGONIST

(barely whispering)

No more violence...

He sits on the edge of the counter, holding the gun close. A long moment passes, filled with the weight of his choices. He stares at the gun, memory flooding in—flashes of anger, pain, and regret.

PROTAGONIST

(to himself)

What am I doing?

Suddenly, a SOFT SOUND behind him—a rustle of gum packs. He turns to see a YOUNG GIRL (10), clutching a crumpled candy wrapper with wide, calm eyes.

YOUNG GIRL

(innocently)

Is everything okay, mister?

Staggered, the Protagonist forces a mask over his turmoil. He glances back at the gun, then at the girl, momentarily caught between his past and the innocence before him.

PROTAGONIST

(shakily, forcing a smile)

Yeah, everything’s fine... just... taking a break.

As the weight of the gun settles heavily in his palm, he recalls the screams, the chaos; he feels the sadness creeping in. He steadies his breath, feeling the depth of her question.

YOUNG GIRL

(confidently)

You look sad.

Her concern pierces through the darkness. The Protagonist swallows hard, grappling with his pain but searching for a connection.

PROTAGONIST

(steadying himself)

It’s okay to feel sad, you know?

YOUNG GIRL

(seriously)

Mom says sadness is like rain. It helps the flowers grow.

Surprised by her wisdom, he takes in her words, the pressure of the gun lightening in the grip of empathy.

PROTAGONIST

(earnestly)

You’re right. I need to decide what kind of flowers I want to grow.

The Young Girl beams, brightening the mood.

YOUNG GIRL

(cheerfully)

Flowers that smell good!

She bounces back to the candy aisle, leaving him with a bittersweet smile. He reflects on her words, the gun feeling less like an anchor and more like a bridge away from violence.

PROTAGONIST

(quietly to himself)

Choose...

The camera pulls back, revealing the Protagonist alone in Korner Mart, newfound understanding resonating.

PROTAGONIST (CONT'D)

(determined)

No more chaos.

He approaches the counter, setting the gun down, stepping back as if casting away darkness.

PROTAGONIST (CONT'D)

(to himself)

What will I choose...?

FADE OUT.
