# Supplementary material
Source: ML conference proceedings conference paper supplement (https://openreview.net/forum?id=Sxi6gBtJcI)
Supplement: supplementary_material [file refined_screenplay_1.docx]

The refined_Sreenplay Act 1 of 'Amadeus_novel_docx':

[Act 1-Scene 1]:

INT. SALZBURG - LEOPOLD MOZART'S STUDY - DAY

A sun-drenched room filled with musical scores, instruments, and the sound of a CHERUBIC melody wafting through. Lively drawings of music notes hang on the walls.

YOUNG WOLFGANG AMADEUS MOZART (6, bright-eyed and spirited) sits at a small harpsichord, his fingers dancing over the keys. His face radiates intense excitement and fervor as he loses himself in the music.

LEOPOLD MOZART (40s, proud but visibly anxious), his father, stands nearby, observing with a blend of admiration and worry. He clutches a sheet of music in his hand, ready to guide but also struggling with the weight of his son’s prodigious talent.

LEOPOLD

(encouraging but firm)

That’s it, Wolfgang! Feel each note, let them soar!

Wolfgang stops abruptly, his gaze turning to his father, eyes alight with curious ambition.

WOLFGANG

(innocently, bubbling with eagerness)

Papa, do you truly think I’m good? It’s like I’m soaring through the clouds!

Leopold kneels beside Wolfgang, placing a gentle hand on the boy's shoulder.

LEOPOLD

(smiling, genuinely)

Good? Wolfgang, you’re a marvel! You’re already breathing life into notes!

He gestures toward some framed compositions hanging on the walls, the legacy of famous composers.

LEOPOLD (CONT'D)

One day, people will look upon your name just as they do these...

As Wolfgang’s eyes wander to a portrait of BACH, a quiet “wow” escapes his lips. The boy's heart races with a fierce ambition.

WOLFGANG

(voice soft with awe, bursting with ambition)

Do you think I could play like him one day? I dream of composing the most beautiful symphonies the world has ever heard!

Leopold’s pride swells but is shadowed by anxiousness.

LEOPOLD

(thoughtful)

If you practice and believe… yes, my child. If your heart is in the music, you will inspire generations.

Wolfgang leans forward, eyes sparkling with determination.

WOLFGANG

(with fervor, excitement bubbling)

Papa, I can’t wait to learn everything! What’s next in my music journey? I want to compose too! The world needs to feel my spirit through my music!

Leopold looks taken aback by Wolfgang's eagerness, but smiles, recognizing the intensity of creativity in his son.

LEOPOLD

(encouraging, confident)

Absolutely! The world is waiting for your music! The melodies you create will change hearts forever!

Wolfgang nods vigorously, returning to his harpsichord with enthusiasm.

CUT TO:

EXT. SALZBURG STREET - DAY

Outside, a vibrant market bustles with PEOPLE, CHOIRS of street vendors filling the air with lively chatter. Music filters through the noise, and some townsfolk glance towards the MOZART household, curious and intrigued.

BACK TO:

INT. SALZBURG - LEOPOLD MOZART'S STUDY - CONTINUOUS

Wolfgang begins to play again, a joyful minuet that echoes with precision. A few notes falter, but he shrugs off the mistake, flicking a lock of blond hair from his brow with youthful defiance.

WOLFGANG

(determined, resolute)

I’ll keep going! Every note will shine brightly like my dreams!

LEOPOLD watches, a mixture of pride and a hint of anxiety etched on his face.

LEOPOLD

(quietly, to himself)

The world awaits, my boy...

His heart swells, though a flicker of fear shadows his pride.

Suddenly, a KNOCK on the OPEN DOOR. NANNERL (10, Wolfgang’s protective sister) enters, her face glowing with admiration.

NANNERL

(enthusiastically)

You’re amazing, Wolfgang! Your music is pure magic!

Wolfgang beams, cherishing her praise.

WOLFGANG

(playfully)

I’m going to be the greatest musician ever! I’ll make everyone feel what I feel in my heart!

NANNERL

(teasing, warm)

You better be! The world will dance to every note you play!

Their laughter fills the room, a warm melody of sibling affection amidst the backdrop of Leopold’s watchful eye.

The music crescendoes as Wolfgang beams with sincerity, ready to conquer his father’s world of music.

CUT TO:

INT. SALZBURG - LEOPOLD’S STUDY - LATER

Leopold stands now, pacing as he jots notes feverishly, the weight of his son’s future hanging heavy. Wolfgang has picked up a VIOLIN, curiously testing the strings.

LEOPOLD

(passionately)

You must channel your genius! Every maestro must command the stage! Your music must echo through the ages and mesmerize every soul!

WOLFGANG

(challenging, full of hope)

What if they don’t recognize my talent, Papa? I want them to truly feel my heart!

Leopold’s eyes sharpen as he looks at Wolfgang, determination igniting within him.

LEOPOLD

(firmly, with conviction)

They will, my son. Have faith in your gift and your passion! Let your spirit shine through your music!

The sun casts a golden glow over them as the scene builds to a close, with Wolfgang about to play a brief, yet powerful piece that embodies his spirit. The music begins to swell, echoing their hopes and dreams.

FADE OUT.

[Act 1-Scene 2]:

EXT. VIENNA - ROYAL PALACE - DAY - 1762

A grand day unfolds at the imposing Royal Palace. The sun casts golden rays over meticulously manicured gardens where elegant COURTIERS mingle. The sound of LUSH MUSIC wafts through open windows, beckoning to all in attendance.

In a lavish MUSIC ROOM, adorned with opulent drapery and shimmering chandeliers, YOUNG WOLFGANG AMADEUS MOZART (6, with flaxen hair and bright, expressive eyes) stands before a HARPSICHORD, his small fingers poised to create magic.

LEOPOLD MOZART (40s, father, proud and expectant) stands by, pride mixed with nervous anticipation as he watches his son prepare to perform for the regal audience.

The chamber is filled with MEMBERS OF THE ROYAL FAMILY, MARIA THERESA (50s, commanding yet benevolent), surrounded by her COURT, including her elegant daughter, MARIE ANTOINETTE (7).

LEOPOLD

(whispering, to Wolfgang)

Remember, play from the heart. Feel the music!

Wolfgang nods, taking a deep breath, excitement sparkling in his eyes.

WOLFGANG

(whispering back)

I will, Papa. They’ll love it!

He straightens his posture, glancing at MARIA THERESA, who observes him with an intrigued smirk. Wolfgang begins to play, the enchanting notes flowing gracefully from his fingertips.

EXT. PALACE GARDENS - CONTINUOUS

A few COURTIERS gather outside, intrigued by the melodious sounds emanating from within.

COURTIERS murmur appreciatively, their eyes gleaming with eagerness.

COURTIER 1

(elbowing)

It sounds like precious gold!

COURTIER 2

(nodding eagerly)

Who is the composer?

INT. MUSIC ROOM - CONTINUOUS

Wolfgang plays his heart out, the notes becoming a bright tapestry of sound, soaring above the expectations of the grand gallery. He casts glances toward the Empress, finding inspiration in her attentive gaze.

MARIA THERESA

(smiling, to her court)

Marvelous!

The room explodes in applause as Wolfgang concludes. Wolfgang bows with a boyish grin. He glances sideways, catching LEOPOLD’s breathless pride.

LEOPOLD

(brimming with joy, to Wolfgang)

You were magnificent!

Wolfgang beams, feeling a rush of exhilaration.

WOLFGANG

(excited)

I did it, Papa! They liked it!

The mood shifts as MARIA THERESA stands, her regal presence commanding silence.

MARIA THERESA

(calling out)

My dear boy, you’ve filled our hearts with your music! Your talent is extraordinary!

Wolfgang's heart skips. His eyes widen at her praise.

MARIA THERESA (CONT'D)

(gesturing)

Come forth, my boy!

Wolfgang steps forward, apprehension intertwining with joy. The COURTIERS look on with admiration.

MARIA THERESA (CONT'D)

(warmly)

Such a rare talent you possess! How does one so young hold such magic within?

WOLFGANG

(boldly)

It’s the music, your Majesty! It speaks to me... and I share what it tells me.

The MARQUIS nods, impressed.

MARIA THERESA

(grinning)

You are destined for greatness! Your music brings joy to all who hear it, and I am honored to witness your gift.

A buzz of excitement fills the room—whispers ripple among the COURTIERS. LEOPOLD exhales, feeling the weight of responsibility and pride for his son’s burgeoning fame.

LEOPOLD

(to himself, steadily)

This is but the beginning...

As MARIA THERESA gestures to the COURT, Wolfgang’s spirit sings with thrill. Possibilities dance in the air, the hint of an emerging destiny lingers.

WOLFGANG

(under his breath, to himself)

I will be more...

LEOPOLD

(clapping jovially)

Bravo! Bravo, Wolfgang!

The applause intensifies! Wolfgang smiles bigger than ever before, embodying both the child and the savant. The camera captures a close-up of MARIA THERESA as she watches him with keen interest, considering the future of this musical prodigy.

FADE OUT.

[Act 1-Scene 3]:

EXT. MUNICH STREET - DAY - 1763

The bustling streets of Munich are alive with color and sound. Merchants shout their wares, while elegantly dressed CITIZENS navigate through the throngs. The CAMERA PANS to reveal WOLFGANG AMADEUS MOZART (7, tousled hair, bright eyes filled with ambition) walking beside his father, LEOPOLD MOZART (early 40s, stern yet proud), who carries a stack of sheet music.

As they pass a GROUP OF MUSICIANS playing merrily, Wolfgang pauses, entranced by the harmony filling the air. He watches as they perform, a flicker of admiration mixed with an unsettling hint of envy flickering across his youthful face.

LEOPOLD

(noticing Wolfgang’s gaze)

Come, Wolfgang. We have work to do!

Wolfgang reluctantly turns away, but not before casting one last glance at the musicians. A brief spark of jealousy flashes in his eyes.

WOLFGANG

(murmuring)

They’re good...

LEOPOLD

(understanding)

You will be better.

Wolfgang wrestles with his thoughts and feelings as they continue walking through the lively market.

WOLFGANG

(quietly, reflective)

I admire them, but I want to stand above them too.

WOLFGANG (CONT'D)

(a pause, heart racing)

Why do I feel this way? They play so beautifully,

and I... I want to be that good. But deeper,

there's this shadow—what if they don’t let me?

Wolfgang grips the stack of sheet music tightly, his knuckles white, fighting against the conflict brewing within.

WOLFGANG (CONT'D)

(voice trembling)

Every note they play makes my heart race,

but also fills me with fear. How can I climb above

their brilliance if my own talent fades like a whisper?

CUT TO:

INT. MUNICH OPERA HOUSE - LATER

A grand venue filled with elegantly dressed AUDIENCE MEMBERS. Wolfgang stands alone on stage, a small figure amongst the grandeur, clutching his violin. The nervous energy crackles through him, creating an electric atmosphere.

The OPERA CONDUCTOR nods to him. Wolfgang takes a deep breath, prepares himself, and begins to play a lively SONATA. His small fingers glide effortlessly, pouring emotion into the music.

The AUDIENCE is captivated, shifting in their seats, some exchanging impressed glances. But amidst the applause, Wolfgang locks eyes with a rival PERFORMER (20s, smug and confident) who smirks at him from the side stage. The smirk freezes Wolfgang in an instant, planting a seed of doubt.

WOLFGANG

(to himself, whispering)

Can I really be as great as them?

With a determined look, he grits his teeth, fueled by that flicker of envy.

WOLFGANG (CONT'D)

(strengthening his resolve)

No! I will show them—I will be exceptional!

He breaks his gaze, focusing on the music, pouring his heart into the performance. The admiration from the audience grows louder, clapping resonating like thunder as he bows graciously at the conclusion.

WOLFGANG

(reflecting)

I’ve met so many incredible musicians on this journey. I want to be like them but better!

CUT TO:

INT. BACKSTAGE DRESSING ROOM - MOMENTS LATER

Wolfgang enters, breathless and smiling. The door creaks open, revealing LEOPOLD and PADRE MARTINI (50s, distinguished musician), who stands observing with a contemplative frown.

LEOPOLD

(brimming with pride)

That was magnificent, Wolfgang!

Wolfgang beams, basking in the praise, but senses the tension in PADRE MARTINI's demeanor.

PADRE MARTINI

(carefully)

Yes... impressive. But beware, young one.

Wolfgang’s smile falters, sensing the underlying caution.

PADRE MARTINI (CONT'D)

(emphasizing)

There are many who would see your light extinguished. Talent breeds envy.

Wolfgang looks down, the weight of the words sinking in. He bites his lip, struggling with the shadow of the competition looming over him.

WOLFGANG

(defiantly)

I won’t let them stop me.

LEOPOLD places a hand on Wolfgang’s shoulder, offering comfort.

LEOPOLD

(encouraging)

We will face it together, son. Music is your path, and we will walk it side by side.

With newfound determination, Wolfgang raises his head, driving away the fleeting clouds of envy.

WOLFGANG

(smiling bravely)

I’ll compose something even greater!

Suddenly, there’s a KNOCK on the door. The rival PERFORMER enters, smirking once again.

RIVAL PERFORMER

(mockingly)

Heard you played well today, little Mozart. Hope you’re ready for the next challenge.

Wolfgang narrows his eyes, but LEOPOLD interjects.

LEOPOLD

(sternly)

We welcome competition. It helps Wolfgang grow!

As the rival laughs and leaves, Wolfgang clenches his fists, his emotional turmoil boiling beneath the surface.

FADE OUT.

[Act 1-Scene 4]:

INT. VIENNA - MOZART'S STUDY - DAY - 1768

The room is filled with sunlight streaming through large windows, illuminating scattered sheets of music and a grand piano. WOLFGANG AMADEUS MOZART (12, tousled hair, bright eyes filled with ambition) sits at the piano, his fingers hovering over the keys, a mixture of excitement and anxiety etched on his face.

He glances at a letter on the desk, the royal seal of JOSEPH II glinting in the light. The weight of the commission hangs heavily in the air, a turning point in his young career.

WOLFGANG

(to himself, whispering)

An opera... my first opera.

He takes a deep breath, the thrill of the opportunity battling with the pressure of expectations. He begins to play a few notes, but they falter, his mind racing.

WOLFGANG (CONT'D)

(frustrated)

What if it’s not good enough?

He stands abruptly, pacing the room, his hands running through his hair. The excitement of creation is overshadowed by the envy he senses from his peers, the whispers of doubt creeping in.

WOLFGANG (CONT'D)

(murmuring)

They’ll think I’m just a child... a novelty.

He stops at the window, looking out at the bustling streets of Vienna, where musicians and artists mingle, their laughter and music a constant reminder of the competition.

WOLFGANG (CONT'D)

(determined)

No! I will show them.

He turns back to the piano, his fingers poised over the keys once more. He begins to play a lively melody, the notes flowing with newfound confidence.

WOLFGANG (CONT'D)

(with passion)

This is my moment!

He pauses, a warm smile spreading across his face as he reflects,

WOLFGANG (CONT'D)

(softly)

This opera could be my best chance to show the world who I am.

This opera is my chance to redefine who I am as a composer!

(awareness growing)

I can feel it in my bones... this is the moment that could change everything!

Suddenly, the door swings open, and LEOPOLD MOZART (early 40s, stern yet proud) enters, a concerned look on his face.

LEOPOLD

(noticing Wolfgang’s intensity)

Wolfgang, my boy, you seem troubled.

Wolfgang stops playing, his excitement dimming slightly as he meets his father’s gaze.

WOLFGANG

(hesitant)

Father, what if I fail? What if they don’t like it?

Leopold steps closer, placing a reassuring hand on Wolfgang’s shoulder.

LEOPOLD

(encouraging)

You are a genius, Wolfgang. This is your chance to shine.

Wolfgang’s eyes flicker with uncertainty, but he nods, absorbing his father’s words.

WOLFGANG

(softly)

But the others... they envy me.

Leopold’s expression hardens slightly, a hint of frustration in his voice.

LEOPOLD

(firmly)

Envy is a shadow that follows talent. You must rise above it.

Wolfgang looks down, the weight of expectation pressing on him.

WOLFGANG

(whispering)

I want to be great, Father.

Leopold lifts Wolfgang’s chin, their eyes locking in a moment of understanding.

LEOPOLD

(softening)

Then you must create. Let your music speak for you.

Wolfgang’s resolve strengthens, a flicker of determination igniting within him.

WOLFGANG

(with newfound confidence)

I will compose something extraordinary!

Leopold smiles, pride swelling in his chest.

LEOPOLD

(encouraging)

That’s the spirit! Now, let’s hear what you have so far.

Wolfgang rushes back to the piano, his fingers dancing over the keys, the melody flowing with passion and purpose.

WOLFGANG

(as he plays)

This will be my legacy!

The music swells, filling the room with a vibrant energy, a reflection of Wolfgang’s inner turmoil transforming into creative brilliance.

THE MUSIC SWELLS AS ASPIRATIONS UNITE...

FADE OUT.
