# Supplementary material
Source: ML conference proceedings conference paper supplement (https://openreview.net/forum?id=Sxi6gBtJcI)
Supplement: supplementary_material [file refined_screenplay_1.docx]

The refined_Sreenplay Act 1 of 'The_Time_Machine_Novel_docx':

[Act 1-Scene 1]:

INT. TIME TRAVELLER'S LABORATORY - NIGHT

The cosmic hum of the universe reverberates through the cluttered, dimly-lit laboratory. Science equipment and dusty textbooks haphazardly litter the room. At the center, the TIME TRAVELLER (40s, disheveled, pale but feverishly alive) stands with a vacant gaze, his hands trembling slightly. A time machine, squat and metallic, sits ominously in the corner.

He takes a deep breath, attempting to compose himself. The door creaks as FILBY (30s, rustic charm, quietly skeptical), the PSYCHOLOGIST (50s, cerebral), the MEDICAL MAN (40s, pragmatic and weary), and the PROVINCIAL MAYOR (40s, authoritative) enter.

TIME TRAVELLER

(voice trembling)

I’m back...

They look at him with a mix of concern and curiosity.

FILBY

(pushing forward)

What happened? You look like you’ve seen a ghost.

TIME TRAVELLER

(forcing a smile)

Ghosts? No... Something much worse.

The crowd gathers around him, uncertain, the room feels heavier with tension. The Time Traveller abruptly sits at the table, clutching a glass of wine. He takes a deep drink, grounding himself, but his eyes reflect torment from vivid recollections.

TIME TRAVELLER (CONT'D)

(exhales sharply)

It wasn’t just a journey through time... I saw the end of everything.

(FLASHBACK IMAGERY)

He closes his eyes, and visions flash before him: a vast, desolate landscape under a dying sun, crumbling cities, and monstrous dark creatures scuttling through thick, toxic shadows.

TIME TRAVELLER (V.O.)

(voice strained)

I stood amid the echoes of the lost, their cries still haunting me, shadows whispering the fate of humanity. I witnessed the horizon crumble to ash, felt the heat of the sun's last gasps as it burned out, and watched the Earth become barren... devoid of life.

The friends exchange alarmed glances, skepticism brimming in the air.

PSYCHOLOGIST

The end of everything? That’s quite a claim.

TIME TRAVELLER

(voice rising with fervor)

I saw the sun burn out! Earth... barren and desolate.

He stands abruptly, the chair scraping against the floor, his expression wild as he battles the emotions surging within.

TIME TRAVELLER (CONT'D)

(frustration spilling)

Millions of years ahead... mankind devolved into shadows of its former self.

(FLASHBACK IMAGERY)

Images of ghostly figures meandering aimlessly, their faces hollow and lost, flash before the audience’s eyes.

The group shifts uncomfortably, doubt creeping in.

MEDICAL MAN

(with concern)

This is serious. We must consider your implications while ensuring we stay grounded.

TIME TRAVELLER

(interrupting, eyes sharp)

A hallucination? No! I brought something back with me!

He gestures towards the machine now looming like a specter in the dim light. Tension pulses as the friends lean closer, intrigued, yet skeptical.

TIME TRAVELLER (CONT'D)

(voice dripping with urgency)

This... this is my time machine. A reality... not a dream.

PROVINCIAL MAYOR

(doubtful)

You expect us to believe that thing can travel through time?

TIME TRAVELLER

(sincerely)

I’ve been there. Tasted the future.

FILBY

(crosses his arms)

Prove it.

A smirk forms on the Time Traveller's lips—part excitement, part fear. He walks toward the device.

TIME TRAVELLER

(resolute)

I’m going to prove it right now.

He begins adjusting the levers and dials, the machine humming with energy. The friends stare, a mix of apprehension and intrigue breaking the facade of skepticism.

TIME TRAVELLER (CONT'D)

(fingers dancing over the controls)

The fourth dimension... Time. I can move through it!

He pauses, staring hard into the faces of his friends, gauging their reactions.

TIME TRAVELLER (CONT'D)

(pleading)

But before I attempt to prove it to you, let me explain what led me here...

He takes a moment, breathing deeply, collecting his thoughts, the weight of his experiences evident in his eyes.

TIME TRAVELLER (CONT'D)

(voice steady)

But to understand my journey, you must grasp what I experienced. I need you to understand what I went through to fully grasp this. You’ll see the truth, even if it’s hard to accept.

He flicks a switch — the hum morphs into a vibrating resonance, palpable tension fills the air.

CUT TO:

The machinery sparks with energy as the lights flicker. Silence blankets the room, hearts racing, breaths held.

FILBY

(stepping back)

What if it's dangerous?

TIME TRAVELLER

(eyes alight)

In the end, what’s the risk for truth?

A rush of air sweeps through the lab as the machine begins to shimmer and pulse.

CUT TO:

The friends lean forward, expressions shifting from doubt to awe. The Time Traveller’s expression hardens, confronting the weight of his revelation.

TIME TRAVELLER (CONT'D)

(a whisper, filled with fear)

Are you ready to know?

END SUSPENSE: The machine starts to glow, a portal ripples in the air, and the Time Traveller stands poised on the brink of his next journey.

FADE OUT.

[Act 1-Scene 2]:

INT. TIME TRAVELLER'S LABORATORY - NIGHT

The room hums with excitement, every corner filled with scientific paraphernalia. A private dinner gathering lingers in the air, illuminated by flickering candlelight, as the TIME TRAVELLER stands confidently next to the now-glowing model of his time machine—a metallic construct glinting like a beacon.

Around the table, a mix of guests stare, caught between skepticism and intrigue. FILBY (30s, rustic charm, skeptical), the PSYCHOLOGIST (50s, cerebral), the MEDICAL MAN (40s, practical), and a few new MEN from the press gather with observant expressions.

TIME TRAVELLER

(voice booming with zeal)

Now watch closely. This is where the magic happens.

The guests lean in, tension palpable, exchanging incredulous glances. The Time Traveller’s fingers dance over the intricate controls of the machine, flicking levers with deliberate precision.

TIME TRAVELLER (CONT'D)

(smirking)

It’s not a mere illusion, my friends. This is real!

As he flips a FINAL SWITCH, a low rumble reverberates through the room. The machine shudders, and the lights begin to flicker.

FILBY

(nervously)

I don’t like the sound of that. What if it explodes?

PSYCHOLOGIST

(intrigued)

Or, worse... what if it actually works?

A moment of heavy silence fills the air, hearts racing. The glow intensifies, casting eerie shadows. Suddenly, a violent gust of wind sweeps through the laboratory. The machine SPARKLES and, in a breathtaking moment, VANISHES before their eyes.

The room goes silent, shock gripping each guest. A few beats pass as they process what just happened. They stare at the empty space where the machine once stood.

FILBY

(stammering)

What just happened? Did it really vanish?

**They stare at the empty space, jaws dropped in disbelief.**

**He looks to the Time Traveller in disbelief.**

TIME TRAVELLER

(grinning, voicing the unthinkable)

It’s gone!

**The PSYCHOLOGIST steps back, eyes wide with disbelief.**

PSYCHOLOGIST

(shock evident)

Where did it go??

**The MEDICAL MAN’s jaw drops, hands shaking slightly.**

MEDICAL MAN

(jaw dropped)

Are you telling us that’s it? It’s just... gone?

**A few beats pass as they continue to process the moment. The Time Traveller remains composed, relishing their shock. A flicker of excitement dances in his eyes.**

TIME TRAVELLER

(challenging)

The true question is... where does it go?

**The other guests fall silent again, the weight of his question settling over them—a blend of caution and curiosity begins to take root.**

MEDICAL MAN

(recovering)

You seriously want us to believe that machine can traverse time itself?

TIME TRAVELLER

(animated)

Yes, and just think! It can take us to places beyond our wildest imaginations.

The guests exchange looks, skepticism battling with a flicker of hope. The sound of distant clocks ticking echoes like a heartbeat, accentuating the tension.

PSYCHOLOGIST

(compelled)

I must admit, I’m intrigued.

FILBY

(muttering)

This could either be genius or madness…

The Time Traveller, filled with conviction, leans closer to them, his excitement nearly contagious.

TIME TRAVELLER

(earnestly)

You wanted truth, and now you have it!

The guests, caught in the swirling tide of disbelief and wonder, murmur amongst themselves, drawn deeper into the mystery.

MEDICAL MAN

(slowly)

But how can we be sure this isn’t just a trick?

TIME TRAVELLER

(voice steady)

You’ll have the chance to join me. Are you ready to explore the realms of time?

The room holds its breath, the guests' expressions shifting from skepticism to tantalizing curiosity. The possibility of adventure hangs in the air.

TIME TRAVELLER (CONT'D)

(pausing)

Shall we?

END SUSPENSE: A mixture of excitement and trepidation rushes through, as they collectively ponder—where did the time machine go, and what lies ahead?

FADE OUT.
