# Supplementary material
Source: ML conference proceedings conference paper supplement (https://openreview.net/forum?id=Sxi6gBtJcI)
Supplement: supplementary_material [file refined_screenplay_1.docx]

The refined_Sreenplay Act 1 of 'Murder_on_the_Orient_Express_Novel_docx':

[Act 1-Scene 1]:

EXT. ALEPPO TRAIN STATION - WINTER MORNING - 5:00 AM

The platform is dimly lit, the air thick with the chill of a winter’s morning in Syria. The Taurus Express stands majestically, its steam curling into the cold air. LIEUTENANT DUBOSC, a young French officer in crisp uniform, stands at the foot of the train steps, his breath visible in the frosty air. He watches as HERCULE POIROT, a small man wrapped in layers of clothing, prepares to board.

DUBOSC

(voice steady, but with an undertone of concern)

Monsieur Poirot, I wish you a safe journey.

POIROT

(turning, his pink-tipped nose peeking out)

Ah, Lieutenant! You are too kind.

Dubosc's eyes linger on Poirot, admiration mixed with concern. He shifts his weight, the tension palpable.

DUBOSC

(earnestly)

I hope... I hope you will find what you seek in Stamboul.

POIROT

(smiling, but with a hint of seriousness)

It is not what I seek, but what I may uncover that matters.

Dubosc nods, his expression clouded with unspoken thoughts. He glances at the train, then back at Poirot.

DUBOSC

(voice low)

The situation here... it grows more precarious by the hour.

POIROT

(understanding)

Ah, the weight of duty, Lieutenant. It is a heavy burden.

DUBOSC

(sighing)

My General ordered me to hold the line above all else, yet... I cannot help but admire your courage.

DUBOSC

(with inner conflict)

The weight of my orders clashes with my respect for your mission. How does one balance duty with admiration? The recent commands weigh heavily on my conscience.

POIROT

(placing a hand on Dubosc’s shoulder)

And yet, it is the soldier who protects the honor of his country. You must not underestimate your role.

DUBOSC

(voice filled with inner conflict)

Yet, there is concern... What if your presence complicates matters? Duty must prevail, even in personal regard.

POIROT

(leaning closer, reassuring)

Then I shall bear that burden, as you bear yours. We each have our paths to tread.

DUBOSC

(conflicted)

I am torn, Poirot! The General expects results, and I fear they may not align with the truth you seek.

POIROT

(smiling gently)

Certainty is a luxury, my friend. We must embrace the unknown and our duties.

Dubosc takes a deep breath, steeling himself. He straightens his posture, a flicker of resolve igniting within him.

DUBOSC

(steadfast)

Then I shall do my duty, even under the pressure of my superiors.

POIROT

(nodding)

And I shall carry your respect with me.

The train conductor appears, gesturing for Poirot to board. Poirot turns, giving Dubosc a final nod.

POIROT

(cheerfully)

Until we meet again, Lieutenant.

DUBOSC

(saluting)

Safe travels, Monsieur Poirot.

Poirot boards the train, his figure disappearing into the carriage. Dubosc watches, a mix of admiration and concern etched on his face. The train begins to move, the sound of its wheels clattering against the tracks echoing in the stillness of the morning.

DUBOSC

(whispering to himself)

What is your mission, Poirot?

As the Taurus Express pulls away, Dubosc stands alone on the platform, the weight of his thoughts heavy in the cold air.

FADE OUT.

[Act 1-Scene 2]:

INT. TAURUS EXPRESS - RESTAURANT CAR - DAY

The bustling restaurant car of the Taurus Express is alive with the rhythmic sounds of steam and wheels clacking against the tracks. Luxurious yet cozy, the space contains several tables, elegantly laid for breakfast. Outside the window, the sun begins to rise over the distant hills of Syria.

Across one of the tables sits HERCULE POIROT, his small frame almost swallowed by the plush seat. His meticulous attire is immaculate, his mustache perfectly groomed. He watches the other PASSENGERS with keen interest.

POIROT

(to himself, in French)

Ah, each passenger with a tale to tell.

As the train begins a steady rumble, MARY DEBENHAM, tall and composed, enters from the corridor. She looks around, spotting an empty chair adjacent to Poirot.

MARY

Is this seat taken, Monsieur?

POIROT

(gesturing to the chair)

Mais non, Mademoiselle. It is all yours.

Mary sits, smoothing her dark dress as she settles in. Poirot studies her for a moment.

POIROT

You are a brave woman, travelling alone in such times.

MARY

(smiling faintly)

I hardly see it as bravery. Just necessity.

POIROT

And what takes you to Stamboul?

MARY

(teasing, her eyes light up)

Ah, Monsieur Poirot! Should I divulge my secrets to a detective?

POIROT

(smirking)

Perhaps I shall only deduce from your expressions. A governess, I presume? You possess the poise of one used to manage children and their whims.

MARY

(chuckling softly)

Very astute. I was indeed a governess in Baghdad. But there’s more to my journey than mere employment. I carry burdens of the past along with me; my time in Baghdad was not merely for employment, but a journey through shadows. My memories of Baghdad shape my journey; the shadows of my past influence every step I take now. I’ve spent years navigating the intrigues and challenges of the Middle East; the genteel facade of a governess cloaks a life of resilience and strength.

POIROT

(nodding thoughtfully)

Ah, a respite in Stamboul! A city full of history and intrigue. Decisions and destinies often intertwine in such places, do they not?

Their conversation is abruptly halted as COLONEL ARBUTHNOT, tall and with a military posture, enters from the corridor. As Poirot continues to observe with keen eyes, Colonel Arbuthnot enters, his commanding presence cutting through the amiable atmosphere. The Colonel nods politely before taking a seat across from them.

COLONEL ARBUTHNOT

(to Mary)

Morning, Miss Debenham.

MARY

Good morning, Colonel.

The tension hangs lightly in the air as Poirot observes the two, their unspoken connection apparent.

POIROT

(turning to the Colonel)

And you, sir, are en route as well?

COLONEL ARBUTHNOT

(matter-of-factly)

Yes. Duty calls. A soldier’s life is ever in motion.

POIROT

(leaning in slightly)

But one must always find time for personal matters, no?

COLONEL ARBUTHNOT

(avoiding eye contact)

Personal matters are often the heaviest burdens.

MARY

(emphatically)

Yet it is the personal matters that make life worthwhile. Without them, what are we? Just shells, drifting through.

POIROT

Indeed. It is what we conceal that often reveals who we truly are. Secrets can be both shields and swords.

Both Mary and the Colonel glance at him, intrigued. Poirot's eyes twinkle with curiosity.

COLONEL ARBUTHNOT

(flatly)

Everything has its place, Poirot. Not every secret is meant to be uncovered.

As the train barrels forward, the scenery outside shifts into a cascading landscape of ancient mountains and open plains, oblivious to the interactions within.

POIROT

(turning serious)

And yet, my friend, it is the secrets that bind us in ways we often do not comprehend.

The Colonel's jaw tightens, his hand tapping against the table, betraying his irritation. Mary looks between the two, feeling the strain.

MARY

(finding her voice)

Perhaps understanding one another could ease the burdens we carry. After all, shared experiences can lighten the weight of those secrets, can they not?

POIROT

(pleased)

A wise approach, Mademoiselle. After all, we are all fellow travelers on this strange journey.

Suddenly, Mary covers her mouth, stifling a laugh.

MARY

(laughing)

And here we are, stuck in a train! What a time for secrets!

POIROT

(smiling)

Ah, but the journey continues!

The tension hangs still, unanswered questions lingering in the air as the train lumbers into the horizon.

CUT TO:

EXT. TAURUS EXPRESS - DAY

The train snakes through a vibrant landscape, steam trailing behind like whispers of the secrets yet to be revealed.

FADE OUT.
