# Supplementary material
Source: ML conference proceedings conference paper supplement (https://openreview.net/forum?id=Sxi6gBtJcI)
Supplement: supplementary_material [file refined_screenplay_2.docx]

The refined_Sreenplay Act 2 of 'Murder_on_the_Orient_Express_Novel_docx':

[Act 2-Scene 1]:

INT. TAURUS EXPRESS - DINING CAR - EARLY MORNING

The dining car is dimly lit, the soft glow of early morning light seeping through frosted windows. Passengers sit at their tables in tense silence, eating their breakfasts with nervous glances exchanged. The whir of the train is muted under the mounting unease following the murder of Ratchett.

M. BOUC, eyes wide with shock, enters the car, his hands trembling slightly as he scans the faces of the seated passengers. He spots HERCULE POIROT, who sits composedly at a table with his pristine breakfast untouched.

BOUC

(urgently, whispering)

Monsieur Poirot!

Poirot looks up from his coffee, eyebrows raised, sensing the gravity in Bouc's tone.

POIROT

Bouc, my friend! What troubles you?

M. Bouc strides quickly to the table, lowering his voice as he leans forward, his face pale.

BOUC

(horrified, voice trembling)

It's horrific, Poirot! We are in grave danger! M. Ratchett lies dead, and we are alone in this frozen hell! We must piece this together before it's too late. We must act now, Poirot! The longer we wait, the greater the danger becomes!

Poirot straightens, his expression shifting to intense focus, instantly aware of the situation's urgency.

POIROT

Murdered? When? How?

BOUC

(voice quivering)

It happened quite late last night, I believe around one o'clock. We... we are snowed in! There is no means of escape. We must act swiftly!

Poirot leans back, absorbing Bouc's panic. His mind races as he observes the other passengers, who remain oblivious to the details of their predicament.

POIROT

(steadying)

The body is still in his compartment?

BOUC

(nodding, frantically)

Yes! But it gets worse. The conductor, the crew—everyone is in disarray. They are frightened, M. Poirot.

POIROT

(slightly threatening)

And what of the other passengers? Do we know if anyone saw anything?

BOUC

(running a hand through his hair)

I do not know! That is why I wanted to fetch you. There’s an air of fear—a sense that everyone ought to watch their back.

Poirot calms Bouc with a steady gaze, acknowledging his friend’s distress.

POIROT

Breathe, my friend. We will not let fear consume us. We must gather the passengers, bring them to the dining car for questioning.

M. Bouc nods, managing to swallow some of his anxiety.

BOUC

Indeed, yes. Every moment is precious.

POIROT

(rising with purpose)

Lead the way, M. Bouc.

As they walk towards the door connecting to the adjacent compartments, Poirot’s demeanor grows resolute. His mind, in the midst of the chaos, is already analyzing the situation.

BOUC

(speaking quickly)

What if the murderer is one of them? What shall we do?

POIROT

(consoled)

First, we must acquire all possible information without alerting the passengers. Trickery must be avoided.

They exit the dining car together, leaving an air of quiet determination behind them.

INT. TAURUS EXPRESS - CORRIDOR - CONTINUOUS

Bouc and Poirot hurry down the corridor, the soft crunch of snow beneath their feet echoing through the train.

As they approach the first compartment, Bouc pauses, a fleeting expression of dread crossing his face.

BOUC

(stopping suddenly)

What if we fail? What if the murderer strikes again?

POIROT

(gripping his shoulder reassuringly)

This is no time for doubt, my friend. Clarity and focus are what we need. Remember, the truth always emerges from the tangled webs of deception.

M. Bouc draws a deep breath, bracing himself as Poirot leads the way.

CUT TO:

INT. TAURUS EXPRESS - COMPARTMENT DOOR - MOMENTS LATER

A rattle of nearby doors, soft murmurs, and the occasional gasp echo as Bouc knocks at the first compartment door.

POIROT

(leaning closer, voice firm)

We seek your cooperation.

The door opens slightly, revealing a baffled, yet curious PASSENGER.

POIROT (CONT'D)

May we come in? We need to speak with you regarding the incident surrounding M. Ratchett’s... unfortunate demise.

PRINCESS DRAGOMIROFF joins them, her voice cool and collected.

PRINCESS DRAGOMIROFF

(slightly condescending)

We simply must find out what has transpired. Keep us not in the dark.

M. Bouc forces a reassuring smile, glancing at Poirot for guidance.

POIROT

(turning serious)

Let us uncover the truth, one clue at a time.

FADE OUT.

[Act 2-Scene 2]:

INT. TAURUS EXPRESS - DINING CAR - EARLY MORNING

The dining car buzzes with tension as passengers sit at their tables, voices lowering to whispers. The faint sound of clinking silverware is drowned out by the rhythmic thumping of the train against the tracks—a reminder of their nighttime peril.

At a well-set table draped in white linen, HERCULE POIROT sits with a sharp, keen gaze, his coffee untouched. He looks like a man ready to dissect the chaos around him. M. BOUC stands nervously nearby, scanning the room filled with anxious, weary faces.

POIROT

(quietly)

Bouc, we must reveal the connections that bind these people together.

M. Bouc, glancing toward the various passengers with a mixture of dread and curiosity, nods.

BOUC

What if we uncover something... dangerous?

POIROT

(smiling reassuringly)

Ah, my friend, danger colors life. It is our duty to find the truth.

POIROT rises, his aura calm but commanding. He approaches the first table: HECTOR MACQUEEN, an earnest young man, a hint of apprehension in his eyes, sits across from MRS. HUBBARD, an American widow with a boisterous demeanor.

POIROT

(with a gentle tone)

M. MacQueen, I would like to ask you some questions about M. Ratchett.

MACQUEEN

(slightly rattled)

Of course, but... is he really... dead?

POIROT

(somberly)

Alas, yes. You were his secretary, yes? Tell me—did he ever seem in danger?

MACQUEEN hesitates, glancing at Mrs. Hubbard, who leans closer.

MACQUEEN

He... he received threatening letters. I thought he just had enemies in business, nothing more.

MRS. HUBBARD

(interjecting passionately)

Enemies? Outrageous! Perhaps he had good reason to fear!

POIROT

(turns to her)

And you, Madame? What do you know of M. Ratchett?

MRS. HUBBARD

(flustered)

He was rude! Disrespectful! I saw him treat the staff poorly. But that’s not a reason to murder, is it?

The din of chatter hushes, each passenger straining to listen. Poirot’s presence is palpable; a silence falls over the dining car.

POIROT

We may find the key to this puzzle in the reasons people keep. Tell me, do you know the Armstrong family?

MRS. HUBBARD

(eyes widening)

The Armstrongs? They were associated with that awful tragedy years ago—little Daisy!

MACQUEEN stiffens, a flicker of recognition blurring his features.

MACQUEEN

(a whisper)

Daisy Armstrong? That has nothing to do with this!

POIROT

(firmly)

I beg to differ, M. MacQueen. It seems that your employer was not who he claimed to be. His true name was—Cassetti.

Gasps ripple through the dining car. Tensions peak as whispers bloom into anxious chatter.

M. Bouc, eyes darting around, lingers at the edge of the table, processing the passengers’ shock.

M. BOUC

(to Poirot)

You mean to say he was the man responsible for those atrocities?

POIROT

(persistent)

Listen closely, mes amis. Every testimony may uncover a layer of complexity. Nulla enim mala fiunt sine causa.

POIROT pauses, allowing the weight of his words to settle in the air, the tension thickening as the passengers absorb the implications of their shared history with the Armstrongs.

A heavy silence envelops the table as the weight of their shared past settles among them.

POIROT

(continuing)

Their emotions are raw—perhaps we must tread carefully to uncover the truth. Tell me, Mrs. Hubbard, what do you remember of the Armstrong family?

MRS. HUBBARD

(voice trembling)

It was a tragedy that shook the world! Little Daisy...

A moment of silence hangs in the air, the emotional stakes rising as the memories flood back.

POIROT

(softly)

Yes, Madame. The pain of the past lingers. We must understand how it connects to our present.

MRS. HUBBARD

(voice breaking)

I remember the news... it was everywhere!

POIROT

(turning to MacQueen)

And you, M. MacQueen? What do you know of this tragedy?

MACQUEEN

(voice low)

It was... devastating. But I didn’t think it had anything to do with Ratchett.

POIROT

(firmly)

Yet here we are, tangled in a web of history. We must uncover the truth behind these connections.

As Poirot moves to the next table, the camera lingers on the worried faces of the passengers now affected by their shared history with the Armstrongs.

POIROT approaches DR. CONSTANTINE, who sits with a frown, absorbing the tension.

POIROT

(softer)

Doctor, did you notice anything... unusual about the wounds?

DR. CONSTANTINE

(struggling to articulate)

They were ferocious, and yet—some of them seemed almost, as if careless.

An older passenger MECHANIC, previously unengaged, interjects.

MECHANIC

(raising a brow)

A woman’s touch, perhaps? Women can be quite emotional, you know.

POIROT

(turning to him)

You raise an interesting point. Emotions run deep through this train, and often they fuel motives.

He turns back to DR. CONSTANTINE, his voice softening.

POIROT (CONT'D)

Sensed any fear among the passengers following the news of the murder?

DR. CONSTANTINE

(voice trembling slightly)

There’s a palpable tension… Everyone’s on edge, aware that danger lurks amongst us—perhaps the murderer.

POIROT

(nodding, satisfied)

Precisely, Monsieur! We shall navigate within this fear to unveil the sketch of a motive.

The camera expands to capture the uneasy faces, and the whispers intensify—a performance of tension.

A distinct chime of a bell interrupts as passengers glance toward the door; the realistic fear among them rises.

POIROT

Let’s continue to unveil the truth, one thread at a time.

CUT TO:

Bodies shifting uneasily, wary glances exchanged—the quiet chaos of the dining car simmering with the weight of secrets buried deep.

FADE OUT.

[Act 2-Scene 3]:

INT. TAURUS EXPRESS - DINING CAR - PRESENT TIME

The dining car is a blend of elegance and tension, with plush red drapes and polished wooden tables, now a locus of whispered conversations and cautious glances. Snow drifts outside, muffling the world beyond the train. The air is heavy with the scent of freshly brewed coffee and fear.

At a well-set table, HERCULE POIROT leans back slightly, the weight of the recent murder evident in his furrowed brow. He gently stirs his coffee, contemplating the jumble of testimonies gathered thus far. M. BOUC sits across from him, glancing nervously at the passengers as they fidget in their seats.

POIROT

"Vengeance... justice... hidden resentments."

As the whispers swirl around him, Poirot leans back, letting the cacophony of voices fade into a distant hum.

M. BOUC

"What do you see, Poirot?"

POIROT

"Each person here carries a shadow of the past, my friend. Their stories, interwoven with tragedy, provide the clues we need."

He pauses, reflecting deeply, his gaze drifting to the window where the snow falls silently.

POIROT (CONT'D)

"These stories... they linger, revealing the complexity of our fates intertwined..."

As the murmur subsides, Poirot leans back, allowing the chaotic emotions to wash over him. He rises from his seat, his posture controlled yet commanding.

POIROT (CONT'D)

"The echoes of their lives resonate within these walls, beckoning the truth."

He approaches a table where the YOUNG ENGLISH WOMAN (MARY DEBENHAM) and the AMERICAN WIDOW (MRS. HUBBARD) sit. They exchange a look, offering a veneer of calm that belies their anxiety.

POIROT

"Madame, Mademoiselle, can you recount your interactions with M. Ratchett?"

MARY

"He was... unpleasant, Mr. Poirot. A bully to his staff, yet charming when he wanted to be."

MRS. HUBBARD

"Charming? Don’t be daft! He was the worst kind of man—rude and abrasive."

POIROT

"Perhaps that rudeness was cultivated to mask deeper insecurities. Dangers often flourish in arrogance."

The tension in the car thickens; Mrs. Hubbard's face flushes with indignation. Poirot observes her reaction, his investigative instincts ignited.

POIROT (CONT'D)

"And what of the Armstrong family? Did you know them?"

MARY

"I’ve heard whispers... such a tragedy."

MRS. HUBBARD

"Why must we dig into the past? It has nothing to do with us!"

POIROT

"But it does, Madame! The past is never truly buried."

He moves away, shifting his focus to a table with DR. CONSTANTINE, who watches the exchange, concern etching his features.

POIROT

"Doctor, you perceive the weight of their narratives. It is a veiled threat—each one battling their own ghosts."

DR. CONSTANTINE

"Indeed, it seems they have something to hide. Fear grips this train like a vise."

POIROT

"And fear, my good doctor, is a gift for a detective—it reveals the cracks in facades."

From across the room, EDGAR, the serene yet enigmatic passenger, observes Poirot, an unreadable expression on his face. Poirot locks eyes with him for a moment, intrigued.

POIROT (CONT'D)

"We delve deeper into these lives, unearthing grievances… they may provide the key to our mystery—or lock us in chains of silence."

M. BOUC grows anxious, rising to match Poirot’s intensity.

M. BOUC

"What will your next step be, Poirot?"

POIROT

(turning to Bouc, a glint in his eye)

"We shall dissect their emotions like a delicate surgery, for there lies the truth."

M. BOUC

(frowning, a hint of fear in his voice)

"If only they knew, Poirot. This train is a barrel of secrets just waiting to ignite."

As Poirot surveys the dining car once more, the PASSENGERS’ whispers grow louder in a cacophony of anxiety. The tension mounts—the truth awaits just beneath the surface.

FADE OUT.
