# Supplementary material
Source: ML conference proceedings conference paper supplement (https://openreview.net/forum?id=Sxi6gBtJcI)
Supplement: supplementary_material [file refined_screenplay_2.docx]

The refined_Sreenplay Act 2 of 'Fight_Club_Novel_docx':

[Act 2-Scene 1]:

EXT. URBAN STREETS - NIGHT

A dimly lit alleyway pulses with the distant thrum of city life. Rain-soaked pavement glimmers under flickering streetlights, pooling into chaotic reflections. Shadows dance as the PROTAGONIST (30s), pale and frayed, wanders through the night, the chaos of Project Mayhem churning in his mind.

He clutches his head with one hand, eyes darting. The muffled sounds of laughter from a nearby bar filter through, reminding him of joyful faces while his own is clouded with dread. As he paces, MARTY'S VOICE echoes in his memory, a voice filled with determination, urging him to embrace chaos.

PROTAGONIST

(breathlessly)

What am I doing? Where is Tyler leading me?

Suddenly, FLASHBACKS burst into his mind: a chaotic fight club, men screaming in ecstasy and pain; vivid memories of him losing control in a particularly brutal fight; faces of those hurt, those whose lives were irrevocably changed in the wake of their madness.

PROTAGONIST (V.O.)

(haunted)

I can still hear the chaos... the screams, the blood. What have we created?

He remembers a specific incident when strangers became friends over violence, the bond forged in reckless abandon, yet now it feels like a noose.

PROTAGONIST (V.O.)

It was exhilarating... but at what cost? I pushed them all to the brink...

His mind spirals back to the night when a man named RAYMOND had stood in fear before him, crying as the gun pressed against his temple; the image of fear etched into the man's eyes unnerves him.

PROTAGONIST (V.O.)

(trembling)

I made choices that haunted them... haunted me.

Another FLASHBACK hits him hard: a team of men, excitement electrifying the air, hurling themselves into chaos as a red-carpeted floor becomes soaked in sweat and blood — laughter morphing into panic and desperation. The PROTAGONIST shudders as he recalls the faces, the anger, and confusion in their eyes as they struck each other, blinded by adrenaline.

PROTAGONIST (V.O.)

(agonizing)

It was supposed to be an escape... not this.

He turns sharply, catching a glimpse of his reflection in a puddle. A faint smile catches the corner of his lips but quickly fades, revealing confusion and frustration etched on his face.

PROTAGONIST (V.O.)

(continued)

Was this freedom... or just another cage?

As he paces, TYLER (30s), sharp-eyed, perfectly composed, appears from the shadows, leaning against a wall with a devil-may-care grin. His energy contrasts sharply with the Protagonist's turmoil.

TYLER

(with a cocky flair)

You look like you're about to make a decision.

The Protagonist’s eyes narrow in anger and confusion, torn between admiration and irritation. Haunting memories flood back: days when he lost himself in anonymity, and the chaos they created left scars he struggles to ignore—images of nights spent feeling powerful as he directed others into reckless abandon, but now burdened by the consequences of their actions, especially Raymond's.

PROTAGONIST

(sarcastically)

Is that what this is all about? You leading me to another dead end?

TYLER

(smirking)

No, my friend, this is about liberation. You need to embrace the chaos.

The Protagonist steps back, shaking his head, hands balled into fists.

PROTAGONIST

(frustrated)

Liberation? Is that what you call it? It’s madness, Tyler! People are getting hurt, lives are ruined!

TYLER

(advancing)

Ruined? Or reborn? You’re losing yourself in the mundane, and you don’t even realize it.

The Protagonist clenches his jaw, taking a step, almost as if he’s physically distancing himself from Tyler's influence. Another FLASHBACK cuts through his thoughts; teams wreaking havoc, chaos exploding in a moment of euphoria, but now it crashes down with profound despair and guilt—the faces of those hurting as they spiraled into toxicity.

PROTAGONIST

(voice trembling)

I want to control my life, not let it spiral out of control.

TYLER

(darkly amused)

Control is an illusion. You see it, don’t you? The very structure of our reality is falling apart.

The Protagonist looks away, guilt washing over him as he remembers Raymond, and others like him, trembling and uncertain because of the chaos he incited. The memory of Raymond’s terrified face haunts him, calling out the innocence lost to following Tyler’s reckless path.

PROTAGONIST

(desperate)

I’m stuck between wanting to fight back and just...

He trails off, the anguish flooding his features. Tyler moves closer, personal, invading.

TYLER

(insistent)

Just what? Give in? It’s easier, isn’t it? To float on the surface while the world burns beneath.

The Protagonist’s breath quickens, the decision weighing on him as tension coils in the air, almost palpable. He runs a hand through his hair, frustration boiling over.

PROTAGONIST

(voice trembling)

I don’t want to float anymore! I just want a normal life!

Tyler cackles, the sound a jarring contrast to the Protagonist's pain.

TYLER

Normal? You’re not made for that. You know deep down that normal is worse than chaos.

The sky overhead rumbles ominously, mirroring the storm raging within the Protagonist’s heart. He turns away, a single, anguished sob escaping his lips.

PROTAGONIST

(barely a whisper)

Why can’t I just be me?

Tyler grabs the Protagonist's shoulders, shaking him with fervor.

TYLER

(with fervent passion)

Because 'you' is just a shadow! You have to destroy that version of yourself to be reborn!

As Tyler's words sink in, the Protagonist's expression shifts from sadness to dread—visions of chaos, violence, and their consequences flooding his mind: a life he once guided putting themselves in danger while reveling in reckless abandon, and the memory of Raymond gets sharper, unresolved, a specter of guilt haunting him.

PROTAGONIST

(voice shaking)

Is this what I’m supposed to do? Just give in to your madness?

TYLER

(smiling, inviting)

Not just give in... embrace it! Find your true self in the chaos!

The rain begins to fall harder, each drop like a fleeting beat of his heart aligning with the vehemence of Tyler's proclamation.

PROTAGONIST

(whispers)

But what if I can’t come back?

The thunder cracks overhead, and Tyler’s gaze sharpens with intensity.

TYLER

(with resolute certainty)

Then you’ll see the world in a way you never thought possible.

The Protagonist stares deep into Tyler’s confident eyes, his resolve faltering but curiosity igniting a dangerous flame within him. The battle between his past choices and the magnetic pull of chaos is palpable.

PROTAGONIST

(tentatively)

I don’t know...

TYLER

(grinning)

That’s the first step. Start questioning everything. Let’s see how deep this rabbit hole goes.

Tyler releases his grip slowly, and the camera zooms in on the Protagonist's conflicted expression as he grapples with an escalating internal crisis. The world spins around him, chaos creeping closer with every heartbeat.

FADE TO BLACK.

END SCENE.

[Act 2-Scene 2]:

INT. IMAGINED HEAVENLY SPACE - ETERNAL TWILIGHT

The screen is filled with swirling COLORS that pulse and shift, a CHORUS OF WHISPERS echoing through the void. The PROTAGONIST (30s), lost in an ethereal haze, floats amid the fog of his consciousness, surrounded by SHADOWY FIGURES.

Each figure represents a choice—haunting specters of innocence lost—and their whispers intertwine, creating a dense atmosphere of regret.

PROTAGONIST

(voice trembling)

What have I done? Is there still a way back?

His words dissipate into the fog, swallowed by the chaos. Suddenly, MARLA (mid-20s), her face radiant, cuts through the silhouette, shimmering like a beacon.

MARLA

(echoing softly)

You have to confront it. All of it.

MARLA

(deeply)

Remember that night at the Regent? We thought we’d never wake up. Those moments mattered.

MARLA

(reminiscing)

You held me when the pain felt too much. You remember how we sat together, sharing our fears? It was in that chaos we found solace in each other.

Her eyes soften, reflecting the bond they've forged amidst their turmoil.

MARLA

(fondly)

We were two lost souls, battling our demons, finding light in each other’s darkness.

The Protagonist’s eyes widen, his chest tightening as his surroundings pulse like a heartbeat, illuminating faces from his past—BOB, RAYMOND, each visage a reflection of his choices.

PROTAGONIST

No… I wanted to change. I didn’t mean to hurt anyone…

The figures edge closer, their eyes filled with anguish, their voices a SYMPHONY OF GUILT.

SHADOWY FIGURE

You didn’t care, did you?

Each whisper becomes an aching reminder of his inaction. He clutches his head, struggling against the weight pressing down on him.

PROTAGONIST

(shouting)

I thought I was doing something important! Something bigger than myself!

The swirling mist pulses with his rage, the lights flickering like dying stars. He drifts, trapped in this cosmic limbo, forcing himself to see MARLA, who steps forward, her expression fierce and loving.

MARLA

(intense)

Love is a choice too. So is forgiveness. Remember, you’re not just a monster.

MARLA

(urgent)

You need to face this! Remember how we supported each other? That connection is worth fighting for.

PROTAGONIST

(desperate)

But how do I… how do I find my way back?

Suddenly, the Protagonist visualizes a GLOWING LIGHT emerging from the fog, representing HOPE—a symbol of his desire for redemption. The LIGHT flickers above, illuminating his path.

PROTAGONIST

(breathing heavily)

NO! I refuse to let this be the end.

The faces around him blur and reform, moving in an indiscernible dance of blame and despair, but the GLOWING LIGHT grows stronger, anchoring him amidst the chaos.

MARLA

(urgently)

You need to forgive yourself! Face the truth! Remember our shared moments – you can’t erase them, and you don’t have to shoulder this guilt alone!

The Protagonist’s gaze sharpens on the GLOWING LIGHT, now transforming into a FLOATING DOOR—a symbol of a new path, of redemption.

PROTAGONIST

(resolutely)

That door… it represents my chance to make things right.

MARLA

(nodding, hopeful)

Yes! Step through it! Face the light, face the truth of your actions and their consequences.

He can feel the weight of their histories pressing against him, a painful reminder but also a guide. As he takes a tentative step toward the door, the LIGHT grows brighter, illuminating faces of those who were lost in shadow.

PROTAGONIST

(whispers, filled with resolve)

I accept my past. I accept my choices. I want to fix what I’ve broken.

With newfound courage, he moves forward—hand outstretched—through the doorway, where the light envelops him in brilliance.

SHADOWY VOICES

(fading)

You cannot escape the truth…

The echoing voices subside as he vanishes into the blinding glow, leaving the haunting figures behind. The ethereal space melts into a pure white brilliance, leaving only the PROTAGONIST’s soft, determined mantra heard through the chaos.

PROTAGONIST (V.O.)

(gaining strength)

I am ready… I will return… and I will make amends…

FADE OUT.

END SCENE.

[Act 2-Scene 3]:

INT. PROTAGONIST'S CONDO - EARLY MORNING

Sunlight filters through the shattered remains of the floor-to-ceiling windows, casting stark shadows across the debris-strewn floor. The room is a chaotic mix of charred furniture, glass, and personal belongings that have been reduced to wreckage.

The PROTAGONIST (30s) stands amidst the ruins, his disheveled hair reflecting his internal turmoil. He clutches his sides, breathing heavily, overwhelmed by the sight of his destroyed home—a mirror of the emotional devastation echoed within him.

PROTAGONIST (V.O.)

*All I wanted was to feel alive, to break free.*

*But look where that freedom has led me...*

He surveys the wreckage, his gaze falling on particularly poignant remnants: a melted, maimed coffee table, fragments of acrid-scented papers, and the remnants of an expensive-looking set of dishes, now ground to powder. He steps forward, carefully navigating through the debris as if stepping through the remains of his own heart.

PROTAGONIST (V.O.) (CONT'D)

*Tyler. It was all... him. His need for chaos brought*

*me here. My possessions, my life—is this what I hoped for?*

He kneels, picking up a charred piece of wood. His fingers tremble as he rubs the ash between them, the weight of guilt almost unbearable. The memory of the explosion flashes in his mind, each sound echoing like a gunshot: the rise of flames, the shattering of glass, the frantic screams that no one heard.

PROTAGONIST

(whispering, to himself)

*What have I done?*

A beat of silence. His past choices have come back with a vengeance, rippling through him—he longs for reconciliation with his own identity, yet it feels utterly out of reach.

Suddenly, a deep sob escapes him, swelling from a pit of deep sadness.

PROTAGONIST

(murmuring)

*Those moments... lost forever. Why did I let it go?*

He pulls himself back, head buried in his hands, the chaos lying around him reflecting the chaos in his soul. A heavy silence hangs in the air.

PROTAGONIST (V.O.) (CONT'D)

*Maybe I was just a slave to my own desires,*

*and now—now I've lost everything that mattered.*

He unearths a crumpled photograph—The Protagonist, Tyler, and Marla at a party. They’re smiling, uncertain smiles, filled with camaraderie. His heart aches. The anguish builds, and he clutches the photograph closer.

PROTAGONIST

(voice breaking)

*Can I ever get back what I've lost?*

He pauses, a moment of sadness washing over him, before he pushes the photograph back, throwing it away from him as if it burned. He steps back, battling feelings of pain and despair, the turmoil within him turning into an inferno of anger.

PROTAGONIST

(yelling, angry)

*I didn't mean to hurt you! Any of you!*

Frustration surges within him, ignited by the sorrow coursing through his veins. He stands abruptly, tossing aside a broken vase. The ceramic shards scatter across the floor, useless like his hopes.

PROTAGONIST (V.O.) (CONT'D)

*Every choice... leads down a road. I’m at the end of mine.*

The DOORMAN appears at the threshold, concern etched on his face. He hesitates, stepping cautiously inside.

DOORMAN

(softly)

*Sir, the police need you to come down. They want to talk...*

The Protagonist barely acknowledges him, his eyes glazed over, lost in guilt-ridden contemplation. He shakes his head subtly, the implication of loss weighing heavily in the silence.

PROTAGONIST

(a mere whisper)

*It’s too late for that...*

The doorman’s gaze scans the destruction, and he turns back to the Protagonist with mild disbelief.

DOORMAN

*You can't just let this... consume you.*

PROTAGONIST

(turns fiercely to the doorman)

*Consume me? It already has! Look at it!*

He gestures broadly at the devastation, rage mingling with sorrow—an urgent plea for understanding in a world that seems devoid of it.

The doorman falters, stepping back slightly as guilt intertwines with his concern.

DOORMAN

*You have to confront it. Face what you've lost...*

The Protagonist's expression shifts from anger to despair, his voice cracking with vulnerability.

PROTAGONIST

(voice breaking)

*Redemption... can I even find it amid these ashes?*

Silence fills the room; the weight of consequence permeates every corner. The Protagonist, overwhelmed, looks back at the destruction—chaotic remnants of his former life, each one a testament to his choices.

PROTAGONIST (V.O.)

*(determined)*

*I can't erase the past. But maybe... maybe there’s a way forward.*

With a deep breath, he straightens, absorbing the magnitude of the moment. He steps toward the door, leaving the remnants behind—this time not in retreat but in brave acceptance of his tumultuous journey.

FADE OUT.
