# Supplementary material
Source: ML conference proceedings conference paper supplement (https://openreview.net/forum?id=Sxi6gBtJcI)
Supplement: supplementary_material [file refined_screenplay_2.docx]

The refined_Sreenplay Act 2 of 'The_Time_Machine_Novel_docx':

[Act 2-Scene 1]:

EXT. HILLSIDE - YEAR 802,701 A.D. - DAY

The landscape is a haunting blend of decay and vibrant life. The TIME TRAVELLER (40s, disheveled yet determined) stands amidst the ruins of a once-great civilization, gripping the levers of his TIME MACHINE, now a mere shell of its former self. The air is thick with an eerie silence, broken only by the distant rustle of overgrown foliage.

He gazes out over the horizon, where crumbling structures rise like ghosts against a backdrop of a brilliant, shifting sky. The sun casts a kaleidoscope of colors, illuminating the decay with a surreal beauty.

TIME TRAVELLER

(to himself, awestruck)

What have I stumbled into?

He steps forward, his boots crunching on the remnants of shattered glass and stone. The vibrant colors of the flora seem to pulse with life, intertwining with the ruins, creating a tapestry of nature reclaiming its territory.

TIME TRAVELLER (CONT'D)

(reflective)

Humanity... what have we become?

His expression shifts from wonder to apprehension as he surveys the landscape. The beauty is intoxicating, yet a dark foreboding lingers in the air. He takes a deep breath, the scent of damp earth and blooming flowers filling his lungs.

TIME TRAVELLER (CONT'D)

(internal monologue)

This silence... it feels wrong. Who knew the price of our progress?

His thoughts spiral as he considers the consequence of humanity's past actions, reflecting on the knowledge lost and the environmental damage wrought upon the Earth.

TIME TRAVELLER (CONT'D)

(internal monologue)

This silence holds stories of mankind's downfall; I can feel their whispers in the wind. What are we without our stories? Beauty hides a truth I fear to uncover. What price did we pay for our technological marvels? Is this beauty the result of our hubris? How many lives were lost for this lush beauty, and for what gain? Where are the great libraries? The knowledge we amassed lies in dust... This silence whispers of knowledge lost, a testament to our ignorance. What future awaits us when history is dust?

He moves cautiously, his heart racing as he navigates through the overgrown paths. The remnants of civilization loom around him—broken columns, shattered walls, and the skeletal remains of buildings that once touched the sky.

Suddenly, a gust of wind sweeps through, rustling the leaves and sending a shiver down his spine. He stops, scanning the area, his eyes wide with a mix of fear and curiosity.

TIME TRAVELLER (CONT'D)

(whispering)

What creatures inhabit this world?

He recalls the stories of horrors that might have evolved in this future, his mind racing with images of monstrous beings lurking in the shadows. The thought sends a chill through him.

TIME TRAVELLER (CONT'D)

(urgent)

I need to find answers... before it finds me.

He presses on, the urgency in his steps growing. The landscape shifts around him, trees bending and swaying as if alive, whispering secrets of the past. He reaches a clearing, where a colossal figure emerges from the mist—a weathered statue, its sightless eyes seeming to watch him.

TIME TRAVELLER (CONT'D)

(voice trembling)

What are you? A guardian or a warning?

The statue looms over him, a silent sentinel of a forgotten age. He feels a mix of dread and fascination, the weight of history pressing down on him.

TIME TRAVELLER (CONT'D)

(determined)

I must understand this world... and the fate of humanity.

He takes a step closer, the ground soft beneath his feet, and the statue's presence feels both inviting and threatening. The sun breaks through the clouds, casting a warm glow over the scene, illuminating the beauty of decay.

TIME TRAVELLER (CONT'D)

(resolute)

I will uncover the truth, no matter the cost.

As he stands before the statue, the silence deepens, and the air thickens with anticipation. The Time Traveller's heart pounds in his chest, a mix of excitement and fear as he prepares to delve deeper into this strange, beautiful, and dangerous future.

FADE OUT.

[Act 2-Scene 2]:

EXT. LUSH GARDEN - MORNING

A serene morning envelops a vibrant garden, bathed in soft rays of sunlight. Bright flowers bloom in abundance, their colors vivid against the lush green foliage. The air is filled with a gentle hum of life.

The TIME TRAVELLER (40s, smartly dressed but showing signs of wear) stands in the center of this enchanting space, looking lost yet captivated. His eyes widen as delicate silhouettes approach him— the ELOI, whimsical and ethereal creatures resembling children. Their fragile nature is apparent in their soft movements and wide, curious eyes.

The ELOI gather around him cautiously, their expressions a mix of wonder and fearlessness. Among them is WEENA (a beautiful Eloi woman, late teens), her golden hair catching the light. She steps forward, her eyes sparkling with innocent curiosity.

WEENA

(in a sweet tone)

You... strange one.

She reaches out, brushing her fingers against the Time Traveller's hand, feeling the texture of his clothing. The Time Traveller, taken aback by her touch, smiles gently, his heart softening.

TIME TRAVELLER

(bending down, earnest)

Yes, I am strange. But I mean you no harm.

WEENA giggles, her laughter a melodic sound that dances on the morning air. The other Eloi watch, fascinated by the interaction. The Time Traveller is struck by her delicate beauty—but also her fragility.

TIME TRAVELLER (CONT'D)

(concerned)

Are you all right? You’re... so delicate.

WEENA tilts her head, a playful smile gracing her lips, unaware of the depth of his concern.

WEENA

(childlike wonder)

Delicate? Like petals on a flower?

The Time Traveller chuckles softly, realizing the purity of her perception. He watches as other Eloi begin to mimic their conversation with gentle laughter, their voices blending into a harmonious chorus.

Suddenly, a shadow passes over them, and the Time Traveller glances nervously around, recalling the strange beauty and chaos surrounding this world.

TIME TRAVELLER

(tone shifting)

But there are dangers here, you know. You must be careful.

WEENA steps closer, her eyes locking with his, conveying a mixture of confusion and trust.

WEENA

(serious)

Dangers? We are safe... here.

Her naive confidence washes over him like a fresh breeze, momentarily easing his anxiety. He kneels, looking deeply into her eyes, feeling the gentle tug of affection.

TIME TRAVELLER

(softly)

Yet, in this beauty, dangers lurk—do you not see the shadows threatening our laughter?

The other Eloi seem to sense the gravity of the Time Traveller's statement. They share quiet, knowing glances among themselves. The atmosphere thickens with unspoken tension.

WEENA

(whispering)

The sun wakes us... we dance... we play.

She pauses, trying to understand the Time Traveller better, sensing his urgency beneath the surface of her simple existence.

TIME TRAVELLER

(insistent)

And the shadows... what do they signify?

TIME TRAVELLER (CONT'D)

(intensely observing)

Such happiness can blind one to encroaching shadows. Your joy blinds you to the dangers that lurk just beyond the garden's edge.

WEENA furrows her brow, contemplating his question. The other Eloi remain silent, an uneasy tension settling in.

WEENA

(hesitantly)

Shadows are... just shadows. What else?

The Time Traveller's heart races. It dawns on him that her innocence is both captivating and alarming; they live in a world with dangers they seem unaware of.

ANGLE ON a rustling sound in the distance. The Time Traveller's eyes dart toward the noise, and a pulse of concern courses through him.

TIME TRAVELLER

(urgent)

Weena... please, you must be cautious.

He instinctively rises, scanning the potential threat lurking in the shadows. WEENA, confused by his sudden tension, looks around, worried.

WEENA

(reassuringly)

You are with us now. We will keep you safe, too.

The Time Traveller’s heart swells with a strange mix of protectiveness and fear.

TIME TRAVELLER

(with sincerity)

I may have come here not just to observe, but to protect—to find a way back.

Yet another rustle disturbs the moment, and all eyes snap towards the source. The connection between the Time Traveller and Weena deepens as their understanding of danger begins to link with their emotional bond.

TIME TRAVELLER (CONT'D)

(quietly)

Can you not sense the shadows lurking beyond? Beauty, like all things, has its price.

His voice is earnest, and WEENA's expression shifts from curiosity to concern. They stand together, uncertain yet united, as the morning light alters the mood, casting long shadows across the ground—shadows that now hold more meaning.

[Act 2-Scene 3]:

EXT. FOREST NEAR THE PALACE OF GREEN PORCELAIN - NIGHT

The darkness envelops the forest, a suffocating blanket that seems alive. A chilling breeze rustles through the massive trees, their silhouettes daunting against the starlit sky. Leaves whisper secrets, but there’s a heavier sound just beneath—the low, rhythmic hiss of hidden danger. The TIME TRAVELLER (40s, weary yet determined) tightens his grip on a makeshift weapon in his hand—a heavy iron bar—his face a mask of urgency and dread, knuckles white with tension.

WEENA (late teens, delicate and ethereal) stands close by, her golden hair contrasting with the midnight backdrop. She gazes up at him, eyes wide with fear, her beauty stark against the chaos closing in.

TIME TRAVELLER

(voice tense)

Weena, we need to move. They’re getting close.

WEENA trembles slightly, sensing the palpable tension in the air. A rustling noise bursts forth from the bushes behind them, and both freeze.

WEENA

(voice quivering)

What are they?

The Time Traveller’s gaze sharpens, his brow furrowed with concern. He scans the thick underbrush, his heart racing.

TIME TRAVELLER

(grimly)

Morlocks. They inhabit the shadows, preying on the unwary.

TIME TRAVELLER (CONT'D)

(voice breaking)

I... I can’t let them take you, Weena. I’ve lost too much before; I won’t let that happen again!

TIME TRAVELLER (CONT'D)

(pausing to reflect)

This place is a paradise, but I can feel the weight of dangers just beyond the trees.

TIME TRAVELLER (CONT'D)

(reflective)

This fragile sanctuary could not last; the shadows are encroaching.

The rustling escalates, and shadows dart between the trees. He grips the iron bar tighter, muscles coiling with instinctual alarm.

WEENA

(clutching him)

Are we safe here?

TIME TRAVELLER

(shaking his head)

Safety is an illusion here. We must find a way out—now.

Suddenly, the darkness around them seems to pulse. The distant sounds of voices, soft and eerie, float through the night, chilling them to the bone. The Time Traveller’s eyes widen, urgency surging within him.

TIME TRAVELLER (CONT'D)

(urgent)

Weena! We need fire!

She looks confused, glancing back toward the deepening blackness, and he holds her gaze, trying to imbue confidence through the threat looming closer.

WEENA

(hesitant)

Fire? Will it help?

TIME TRAVELLER

(voice trembling)

Yes, Weena! It can drive them back! I cannot risk losing you to them… not again.

TIME TRAVELLER (CONT'D)

(reflective)

This beauty is deceptive; darkness looms just beyond these trees.

The Time Traveller hurriedly gathers dry twigs and branches scattered across the forest floor.

TIME TRAVELLER (CONT'D)

(desperate)

It will deter them.

WEENA instinctively helps him, her delicate hands shaking as she clutches at the dry leaves.

TIME TRAVELLER (CONT'D)

(with intensity)

Just a little more!

The rustling grows louder, a soft but swift patter—that of creatures moving in anticipation. He ignites a match hastily, and its weak flame flickers to life, illuminating the growing terror in Weena's eyes.

ANGLES ON the encroaching darkness, piercing through the trees, revealing glimpses of pale Morlock figures watching with ravenous curiosity.

TIME TRAVELLER (CONT'D)

(holding the match up)

Weena, step back!

He lights the camphor, and it beautifully flares, momentarily casting a warm glow amidst the engulfing gloom. Shadows reel back, frightened of the flame.

WEENA

(gasping)

Look!

Just then, a shriek pierces the night as a MORLOCK lunges from the foliage, its white form illuminated momentarily before the fire. The Time Traveller reacts instinctively, swinging the iron bar, only to connect with empty air.

TIME TRAVELLER

(furiously)

They’re just shadows! We can’t let them surround us!

The camphor's flames flicker wildly, driving back the Morlocks but only for a moment.

ANGLE ON Weena, who suddenly collapses, lying motionless amidst the chaos. Panic sets in the Time Traveller's chest.

TIME TRAVELLER (CONT'D)

(voice breaking)

WEENA!

With desperate urgency, he drops beside her, checking for signs of life.

TIME TRAVELLER (CONT'D)

(frantic)

Please don’t be gone...

The fire crackles around them, illuminating the eerie forest setting. He lights another match, his hands shaking as he holds it close, watching as the fire pushes back against the encircling darkness.

As flames dance, he sees MORE MORLOCKS retreating, blinded by the light. The Time Traveller’s heart races; he knows they must capitalize on this small escape.

TIME TRAVELLER (CONT'D)

(determined)

I won’t let you go, Weena. Not now, not ever. I promise.

Wiping his brow, he lifts her onto his shoulder with newfound resolve, his breath heavy with the urgency of survival.

TIME TRAVELLER (CONT'D)

(muttering)

Hold on, we can make it...

He bursts into motion, navigating the dense underbrush, flames swirling behind them. The crackling fire shoots up explosions of light, revealing the Morlocks shuffled back yet still present.

TIME TRAVELLER (CONT'D)

(reflecting)

Weena warned me about the dangers of the outside world... I should have listened.

They break through the line of trees, entering the embrace of the shimmering moonlight.

TIME TRAVELLER (CONT'D)

(to himself)

Just a little further...

The night sky bears down, heavy with both beauty and dread, as the forest roars with chaos behind them. Their fate hangs suspended in the shimmering dark.

FADE OUT INTO THE NIGHT.
