# Supplementary material
Source: ML conference proceedings conference paper supplement (https://openreview.net/forum?id=Sxi6gBtJcI)
Supplement: supplementary_material [file refined_screenplay_3.docx]

The refined_Sreenplay Act 3 of 'Fight_Club_Novel_docx':

[Act 3-Scene 1]:

EXT. PARKER-MORRIS BUILDING ROOFTOP - EARLY MORNING

The skyline of the waking city stretches beneath a blanket of light fog. The kaleidoscope of dawn casts a soft golden glow over the rooftops. Cold winds whip across the thirty-story Parker-Morris Building, whipping loose debris around. At the edge of the rooftop, THE PROTAGONIST (30s) stands facing TYLER DURDEN (30s), who radiates reckless energy and chaotic charm. A gun gleams ominously in The Protagonist's hand—both a prop and a decision hanging in the balance.

TYLER

Just do it! This is the moment! What’s waiting for you

down there—an existence without meaning? Hiding

in a cubicle?

The Protagonist's grip on the gun trembles as he looks down at the abyss below. His internal conflict rages—between FEAR and HOPE. Marla's VOICE echoes through his mind, bringing clarity as the chaos surges.

MARLA (V.O.)

You're stronger than this. Face yourself—you can

change. You don’t need him.

As vivid memories of Marla flood him, he recalls a night at the Regent Hotel, her laughter ringing in his ears, the way her eyes sparkled with a life he always admired. Each moment they shared flickers in his mind—

MARLA (V.O.)

You deserve to be happy, to be real...

Suddenly, a flashback takes him back to a moment where Marla challenges him, her fierce determination echoing in the dim light of the hotel room.

MARLA (V.O.) (FLASHBACK)

You have to want more than this chaos! Fight for it!

The Protagonist’s heart begins to race as he thinks of her again, her spirit that refuses to yield to chaos. He remembers her sitting cross-legged on the bed, passionately sharing her thoughts—

MARLA (V.O.) (FLASHBACK)

You can choose, you can fight...

Suddenly, he is hit with another memory: Marla standing in a darkened street, shadowed by fears of her own. The weight of those memories presses down upon him. He reflects on the impact of his choices—not only on his life but on Marla's future, pondering how his decision could shape the life she leads without him.

PROTAGONIST

(voice breaking)

You think this is freedom? This isn’t who I am...

Marla believed in more than this chaos.

I remember how she fought for herself. How can I

abandon that?

He steps back, visibly shaken, recalling how her words once challenged him to see beyond his violent impulses. His thoughts swirl as he imagines the life Marla might lead without him—a life filled with void and heartache, trapped in the aftermath of his choices.

MARLA (V.O.)

Fight for what you want! You must not give in...

The Protagonist grits his teeth, letting the surge of Marla's influence empower him. He ponders the life they could have—the warmth of her embrace pulling him from the brink, and how the darkness could swallow her whole if he does not act. He hesitates, picturing Marla's life without him—the love, the laughter, all replaced with darkness.

PROTAGONIST

I’m not pulling the trigger! I won’t let you control me

anymore! I can’t let you destroy her future!

The Protagonist’s voice breaks, the weight of his decision is heavier than ever, intertwined with images of Marla's struggles and aspirations.

PROTAGONIST (CONT'D)

I can’t let my choices haunt her. I must choose life,

a life where she can thrive... not just survive...

I have to fight for us, for the love we could share.

Tyler scoffs, stepping closer, the gap between them narrowing as tension swells, confusion written on his face.

TYLER

Fear? You want to die like this? You want to fade into

nothing, or burn bright and chaotic?

The Protagonist takes a deep breath, pushing through the suffocating weight of Tyler’s influence. He recalls the moments Marla had stood by him, filled with unwavering belief, how she envisioned a life they could share.

PROTAGONIST

Or maybe I want to live...

I want to fight for my life, for Marla's future.

His hands steady, he meets Tyler's penetrating gaze, the memories of Marla igniting a new fire within. The weight of his decision now linked directly to her wellbeing.

PROTAGONIST (CONT'D)

I want to choose who I become, not let you dictate my fate.

A moment hangs heavy with tension—static. Suddenly, images of Marla flicker in his mind—their connection stronger than the chaos. He envisions her standing tall despite the odds stacked against her, and he understands the price of his decision more than ever before, the potential heartbreak if he follows Tyler down the wrong path.

MARLA (V.O.) (FLASHBACK)

You have the power to change everything...

The Protagonist straightens, locking eyes with Tyler, determination igniting his spirit, fueled by thoughts of Marla and the dreams they could share.

PROTAGONIST

No, Tyler. I am my own person now.

You wanted chaos, and I want to protect Marla from it.

In a moment of pause, Tyler's figure begins to flicker, shadows consuming him, a manifestation of the chaos now losing its hold. The Protagonist clutches the gun tighter, remembering Marla's struggles reflected in his own choices.

TYLER

(yelling)

You’ll never escape me!

The Protagonist looks towards the horizon, where sunlight breaks through the fog, illuminating his path forward—a new beginning without Tyler and anchored by the love he feels for Marla.

PROTAGONIST

I’m choosing to fight for Marla, for the life we could have!

The Protagonist throws the gun over the edge. It tumbles weightlessly through the air before splashing into the below rooftop pool—a silent testament to the breaking of chains.

The tension shifts, and Tyler’s demeanor morphs from aggressive zeal to confused anger.

TYLER

You’ll regret this—there’s no place for you in

this world without me...

As Tyler steps back, confusion stretching across his face, the weight of The Protagonist's resolve hangs in the air, amplified by the love for Marla and the vision of a future he desperately wants to avoid condemning.

PROTAGONIST

No, Tyler, I am my own person now. You wanted chaos,

and I think I’m ready for peace.

FADE OUT.

[Act 3-Scene 2]:

EXT. PARKER-MORRIS BUILDING ROOFTOP - EARLY MORNING

The sun rises slowly, spilling amber light over a city still waking. Below, the soft hum of the bustling streets is muffled by the distance. The rooftops glisten with dew, and a gentle breeze stirs loose debris on the edge of the rooftop.

At the edge stands THE PROTAGONIST (30s), disheveled and disconcerted, the gun still clutched in his shaking hands. TYLER DURDEN (30s), confident and reckless, looms beside him, a personification of chaos.

THE PROTAGONIST looks down, his breath heavy with dread. It’s a long way down. Each heartbeat resonates through him, a stark reminder of what lies ahead.

TYLER

(smirking)

You can’t hold onto the past forever.

This is your moment. Embrace it!

The Protagonist’s grip falters, his vision blurring. Then, through the fog of his mind, MARLA’S VOICE breaks through, piercing the chaos.

MARLA (V.O.)

You are strong enough! Don’t let him win!

Flashes of memory ignite—early encounters with Marla, her eyes ignited with passion, laughter echoing in his mind. Vivid memories rush back—images of Marla’s hurt filled with despair and anger when she learned of Tyler’s existence, the panic in her eyes when she tried to escape the chaos.

The wind picks up, swirling around him as if urging him toward an unknown fate. He remembers her gaze, filled with pain, her voice trembling with anguish, "You can’t let him control you!"

THE PROTAGONIST

(to himself)

Marla... I’m so sorry...

A beat, as he looks contemplative, processing the weight of his memories.

TYLER

(leaning closer)

What are you afraid of? The mundane life below, or true freedom?

Tension escalates. Tyler circles The Protagonist like a predator, probing.

THE PROTAGONIST

(voice trembling)

This isn’t freedom, Tyler. It’s insanity.

Look at what you’ve done... what **we’ve** done.

Images explode in his mind—a chaotic montage of their actions together—violence, chaos, destruction, and the faces of those hurt, including Marla’s pain etched across her face. Then Marla appears again, standing against a backdrop of flames, fiery yet beautiful, her expression a haunting mix of fear and anger.

MARLA (V.O.)

You need to break the cycle, reclaim yourself!

As he stands at the precipice, The Protagonist recalls a specific moment: Marla’s face, fragile yet fierce, as she pleads with him through tears, "You can’t let him control you!" The weight of those memories presses on him, intensifying his internal struggle.

THE PROTAGONIST

(whispers, trembling)

I can’t ignore the pain I’ve caused—

the chaos. Marla deserves more...

Thoughts race in his mind—images of Marla's vulnerable self, suffocating sadness, confusion when Tyler’s actions brought her to the edge of despair. Each image burns like a fire, igniting a resolve within him.

Ending with a fresh conviction, he adds

THE PROTAGONIST (CONT'D)

I’ve destroyed what I love. I watched her suffer.

She deserves so much more than this chaos.

TYLER

Keep pretending you’re stronger than you are!

A gust of wind howls, and The Protagonist’s resolve hardens. Underneath the turmoil is a flicker of newfound strength.

THE PROTAGONIST

(steadily)

No! I want to live! Not just exist!

He opens his eyes, suddenly embracing his vulnerability, ripe with clarity—a revolutionary emotional awakening. The memories of Marla, their fragile moments of safety and joy, flood his consciousness, each one a reminder of what he must protect and the consequences of his actions.

THE PROTAGONIST (CONT'D)

I refuse to be a pawn in your game anymore!

I choose my own path!

With dramatic resolve, The Protagonist raises the gun to his head. Tyler's eyes widen in shock. The air crackles, tension thick but electric.

TYLER

(panicking)

You wouldn’t dare! You’re too afraid!

Refusing to succumb to Tyler’s taunts, The Protagonist’s heart races. He absorbs the warmth of the morning sun casting light on his surroundings. He sees Marla’s face clear and unhindered in his mind—her laughter, her support, her bravery in the face of chaos, reminding him of what he stands to lose.

MARLA (V.O.)

You can break free!

The Protagonist’s finger tightens, desperate and rooted in love and pain, embodying both the anguish of his past with Tyler and the vibrancy of his hope for a future free from chaos and control. Each memory—Marla’s fear, her love—swirls within him, a tempest of emotions, each memory sharpening his resolve.

THE PROTAGONIST

(whispering)

I am ready to take back who I am...

He pulls the trigger—an eruption of sound. The gunshot reverberates through the air, echoing his final severance from Tyler’s grasp.

A moment of profound stillness follows. The world seems to pause, suspended in that irrevocable instant of change.

A lingering silence envelops The Protagonist. He drops the gun from his hand, feeling an overwhelming wave of emotions crash over him—relief mingled with an abyss of sorrow and loss.

The silence deepens as he reflects, his mind racing through the chaos he created. Marla’s face floods back vividly—her sorrow, her pain—reminding him of everything he wanted to protect.

THE PROTAGONIST

(voice cracking)

What have I done?

He collapses to his knees, gasping for air, the reality of his actions settling heavily upon his shoulders. He stares blankly at the scorched remnants of what was once his life, his chest heaving as he sees Marla's face again, the image haunting him, reminding him of everything he wanted to protect.

THE PROTAGONIST (CONT'D)

I... I wanted freedom... not this...

A deep breath, as if attempting to anchor himself amidst the chaos of emotions swirling within.

The air around him thickens with sorrow as he cradles his head in his hands, overwhelmed by the weight of his choices crashing down like a tidal wave.

CUT TO:

The gun falls from The Protagonist's hand, trailing into the city below, as the morning sun continues to rise, illuminating the path of his emotional reckoning.

FADE OUT.

END SCENE.

[Act 3-Scene 3]:

INT. IMAGINED HEAVENLY SPACE - ETHEREAL MORNING

A vast, ethereal expanse filled with shimmering lights and soft, swirling clouds. The atmosphere feels both tranquil and electric, as if revealing deep secrets. THE PROTAGONIST (30s) floats mid-air, disoriented yet contemplative, his face a mask of turmoil. The air around him pulsates softly, mirroring his emotional unrest.

Before him, GOD appears—an imposing figure with a kind demeanor, dressed in flowing robes, surrounded by a gentle luminescence.

GOD

(voice warm and resonant)

Welcome, my child. Here, we explore.

It is time to reflect.

The Protagonist’s brow furrows, his emotions shift from confusion to dread as he glances down at his own shadow—each speck of darkness recalls the pain of his past decisions.

THE PROTAGONIST

Why am I here? What is this place?

GOD

(with clarity)

You stand at the crossroads of your existence.

Each choice you've made ripples through time,

reaching beyond your own life.

A swirl of memories flickers in and out of visibility around The Protagonist. Images of MARLA’s (30s) laughter, tears, chaos, and moments of love flash vividly, colliding with scenes of violence and destruction. The light around him dims momentarily, reflecting his internal turmoil.

THE PROTAGONIST

(voice trembling)

I... I never intended to hurt her.

I didn’t understand.

GOD

(nodding gently)

You believed yourself a mere observer,

untouched by the impact of your chaos.

But love, empathy—these reside in connection.

You hurt yourself, yes, but also those

who watched you spiral, like Marla.

A soft, pulsing glow illuminates one memory—Marla’s face, filled with both fierce love and deep sorrow. The Protagonist reaches for her image, his expression breaking as he recalls their last moments, a tremor of regret coursing through him.

THE PROTAGONIST

(breaking)

I was so caught up in my own pain.

I thought I was unique—different.

But I caused so much pain!

I remember that night... when I chose chaos over connection—

when I left her alone in the dark.

How could I not see the love she poured into every moment,

while I drowned in my own turmoil?

GOD

(calmly)

Each of us is a unique snowflake,

yet you forget the weight of your choices.

Reflect on this: individuality without

compassion is a hollow mantle.

Do you understand now?

The Protagonist's gaze drops, his heart aching as the voices of those impacted whirl around him—echoes of hurt and isolation sharpened by flashes of joy he once shared with Marla. The pulsating lights mimic the beating of his heart, each pulse resonating with regret.

THE PROTAGONIST

I was lost. I thought chaos was freedom,

but it only trapped me in loneliness.

It’s not just me—Marla suffered because of me.

I see now how my actions echoed in her heart.

I owe it to her... to everyone...

I didn’t see her struggle until now.

I remember how I ignored her calls for help,

how my actions closed off her light.

Her sacrifices were lost within my chaos,

I realize that now, and it burns inside me.

A soft wind stirs, carrying celestial whispers, pulling at The Protagonist's heart as he digs deeper into his realizations.

GOD

(gently)

It’s not too late.

A vision of Marla appears beside him, radiant yet solemn. The moments unfold—her smile, the way her eyes sparkled with dreams, her tears during their darkest days, each memory casting a warm glow that encircles The Protagonist.

THE PROTAGONIST

(voice thick with emotion)

I... I never recognized her struggle,

her sacrifices amidst my chaos.

I know now that my actions have consequences,

and I must face the pain I've caused.

Marla deserved better from me.

She didn’t deserve to endure this chaos because of my choices.

I see how my actions hurt her. I must amend this.

GOD

(smiling softly)

Understand that true strength lies in vulnerability.

Only when you embrace your pain can you heal.

Redemption is not found in escaping suffering,

but in restoring genuine connections.

The Protagonist’s demeanor shifts from despair to determination. He leans forward, compelled—almost pleading. The winds around him strengthen, lifting his resolve like a wave.

THE PROTAGONIST

(earnestly)

I understand now... My guilt over Marla's suffering

is a weight I must carry. I thought I could live freely,

but that freedom cost her dearly.

I want to change. I must mend what I've broken.

I see that my chaos has hurt her deeply.

I don’t want to lose her... anymore.

The light surrounding God intensifies, and a wave of warmth surrounds The Protagonist, igniting a flicker of hope within him.

GOD

(with conviction)

Then accept who you are—every choice,

every consequence—and let love guide you.

Redemption is a journey, not a destination.

The lights swirl violently, enveloping The Protagonist. He is caught in a whirlwind of memories as he sees himself reaching out to Marla, a mixture of hope and desperation etched in his face. The chaos around him transforms from a storm into a calming breeze.

THE PROTAGONIST

(voice rising through the chaos)

I promise... I will find her!

As the whirlwind dissipates, the heavenly space begins to collapse around him, and with it, the voices fade, replaced by a new understanding—a burning desire for redemption.

FADE OUT.

END SCENE.
