# Supplementary material
Source: ML conference proceedings conference paper supplement (https://openreview.net/forum?id=Sxi6gBtJcI)
Supplement: supplementary_material [file refined_screenplay_3.docx]

The refined_Sreenplay Act 3 of 'Amadeus_novel_docx':

[Act 3-Scene 1]:

INT. COURTYARD OF THE ARCHBISHOP'S PALACE - VIENNA - DAY - 1781

The sun hangs high above the ornate architecture of the palace, casting long shadows on the cobblestones where WOLFGANG AMADEUS MOZART (25, expressive yet worn) paces restlessly. His fingers twitch, a composer’s energy trapped within a body that's feeling the weight of expectations.

A LARGE DOOR swings open behind him, revealing the ARCHBISHOP COLLREDO (50s, austere), dressed in heavy robes with the air of authority. He steps into the courtyard with purpose, his eyes sharp.

ARCHBISHOP COLLREDO

(mockingly)

Ah, my dear Mozart! Always rushing like a man possessed.

Mozart pauses, hides his frustration behind a strained smile, but his eyes betray him.

MOZART

(forcing cheer)

Your Grace! I was indeed, preparing the next composition.

The Archbishop crosses his arms, assessing Mozart like an obstinate student.

ARCHBISHOP COLLREDO

Music for the court needs to be composed with much more... restraint.

Mozart looks down, biting the inside of his cheek, feeling the sting of the Archbishop's words.

MOZART

(earnest)

Your Grace, music is a reflection of one’s soul. Shouldn’t it be full of life?

The Archbishop's gaze narrows, sensing the challenge within Wolfgang's plea.

ARCHBISHOP COLLREDO

(stern)

Life? What life is this? You are a servant of the church, not a playwright.

Mozart’s eyes flash with rebellion, he steps closer, the fire in his heart igniting.

MOZART

(intense)

Your Grace, every note I write is a piece of my soul. How can I serve both my art and your demands?

The Archbishop's brow furrows. He senses the brewing storm in Mozart’s spirit, but he's not easily intimidated.

ARCHBISHOP COLLREDO

(coldly)

You forget your place. Compositions without my approval will remain unpublished.

Mozart steps back, visibly shaken but determined, staring into the Archbishop's eyes.

MOZART

(genuine)

But what if my art is meant to fly? To break free from tradition?

The Archbishop flinches, the tension thick in the air, as if the very stones of the palace resonate with their clash.

ARCHBISHOP COLLREDO

(threatening)

You tread on dangerous ground, Wolfgang. I could have you dismissed.

Mozart clenches his fists, struggling to hold back his emotions. A moment's silence hangs between them, thick with the unspoken.

MOZART

(swallowing his pride)

I need the freedom to express myself. To create!

His voice wavers but remains strong. The Archbishop recoils at the audacity, his ego bruised by the idea of rebellion in his court.

ARCHBISHOP COLLREDO

(smooth but steely)

Then consider—if you are dismissed, how will you fare in the world beyond these walls?

Mozart, breathing heavily, takes a shaky step closer, defiance shining in his eyes.

MOZART

(resolute)

If my heart must ache, let it be for my own music, not for servitude!

The Archbishop’s face turns crimson with anger, yet he masks it beneath a false calm.

ARCHBISHOP COLLREDO

(leaning in)

Very well, if you wish for freedom, be wary of what you wish for. You might find yourself alone.

Mozart's voice rises, filled with passion and pain.

MOZART

(intense)

Alone? Perhaps I was born to be alone to set my music free!

A moment of silence. The struggle within Mozart is palpable, his eyes welling with emotion.

MOZART

(monologue, fervent)

I’ve given everything to my music, yet here I am, suffocated by your demands. How can I breathe life into my notes when they must be shackled to tradition?

With a flick of his robes, the Archbishop strides back into the palace, leaving Mozart standing in the courtyard—solitary, trembling with passion and fear.

CLOSE ON - MOZART’S FACE

His eyes hold a storm of emotion – a mix of despair and resolute longing. A soft breeze flows, ruffling his hair, as he watches the archbishop disappear behind the grand doors.

MOZART

(to himself)

Alone… Perhaps I was born to be alone to set my music free.

The camera PULLS AWAY, revealing the grand yet intimidating palace surrounding him, acoustically amplifying the silence as Mozart stands resolute, but trapped within his mindset.

FADE OUT.

TEXT ON SCREEN: Will he embrace the call of his own artistry, or remain ensnared in expectations?

[Act 3-Scene 2]:

INT. MOZART'S STUDY - VIENNA - DAY - 1782

A sun-drenched room filled with parchment, quills, and a grand piano. The walls echo with the dreams of countless compositions. WOLFGANG AMADEUS MOZART (26, passionate yet weary) sits at the piano, the room around him cluttered with notes and half-finished scores. His fingers nervously tap against the keys, strumming an idea that’s both intoxicating and daunting.

CONSTANCE MOZART (24, supportive but worried) enters from a side door, carrying a tray with tea, her gaze soft but vigilant.

CONSTANCE

(placing the tray down)

Wolfgang, you’ve been at it for hours. You need to rest.

Mozart, lost in thought, waves a dismissive hand, his eyes on the sheets of music.

MOZART

(focused)

Constance, this commission could change everything!

He plays a few notes, feeling the melody coursing through him, invigorating yet haunting.

CONSTANCE

(concerned)

But at what cost? I fear you’re pouring yourself into this too much...

Mozart stops playing abruptly, turning to her, a mixture of frustration and emotion flooding his features.

MOZART

(passionate)

You don’t understand! This isn’t just a commission—this is my chance to show the world who I am!

Constance steps closer, her empathy shining through, her soft voice echoing in the weight of his words.

CONSTANCE

(gently)

I do understand, Wolfgang. But I also see the toll it takes on you.

Mozart stands, pacing the room, his mind racing as he considers her words.

MOZART

I must harness this—the pain, the struggle! It all must weave into my music.

He gestures dramatically as though conducting an imaginary orchestra, embodying the very essence of his passion.

MOZART (CONT'D)

(intensely)

If I don’t pour everything into it, it will be just... notes on a page.

Mozart’s voice softens as he reflects, his expression becoming more vulnerable.

MOZART (CONT'D)

(with urgency)

Just last week, I lost one of my closest friends, and it shattered me. The weight of that loss... it seeps into every composition I create. This piece is born from my grief over losing him. Each note is a tear, each pause a moment of silence for him.

He pauses for a moment, his eyes glistening with emotion.

MOZART (CONT'D)

(with a heavy heart)

This new opera is not just notes on a page; it's a reflection of my heartache—a tribute to my late friend. Every chord must echo my sorrow.

Constance watches him, her heart aching for his pain.

CONSTANCE

(her voice trembling)

But will it bring you joy, Wolfgang?

Mozart pauses, the weight of the question settling in the air. His passionate zeal shifts momentarily to vulnerability.

MOZART

(reflectively)

Joy... It’s entangled in the struggle, isn’t it? Loss fuels my creativity, it gives depth to my song.

He sits back down at the piano, fingers trembling over the keys, as if searching for the right notes—the right balance of joy and agony.

MOZART (CONT'D)

(softly)

Can I channel this storm inside me and compose something beautiful?

Constance kneels beside him, placing a comforting hand on his back, her eyes filled with warmth.

CONSTANCE

(encouragingly)

Your music has always found a way. Just remember, you’re not alone in this.

He glances over at her, an affirming smile breaking through the doubt. The warmth between them thrums with unspoken dreams.

MOZART

(smiling)

Together, we shall create a masterpiece.

He strikes the keys with renewed vigor, a stirring melody filling the room. Constance watches him, her face a blend of pride and concern as she basks in his creative spirit.

CONSTANCE

(whispering)

Just promise me you’ll take care of yourself too.

Mozart continues to play, lost in the music, his face brightening as inspiration takes hold.

MOZART

(with conviction)

If I can capture this moment, the world will finally see me!

As the melodies swell, a tension fills the air—a potent mix of hope and turmoil. The music echoes through the room, a reflection of his internal struggle, embodying his fear and ambition, each note resonating with a sense of urgency.

CLOSE ON - MOZART’S FACE

His eyes close in concentration, reveling in his catharsis, the storm inside him transforming into a powerful orchestration.

MOZART (V.O.)

(breathless)

I will harness this force and pave my path to glory...

FADE OUT.

TEXT ON SCREEN: Can Mozart conquer his inner tumult and achieve the success he longs for?

[Act 3-Scene 3]:

INT. VIENNA OPERA HOUSE - NIGHT - JULY 1782

The grand opera house is alight with anticipation. The air is thick with the scent of polished wood and the chatter of an elegant crowd dressed in the finest attire. The towering chandelier sparkles above, casting a warm glow on the excited faces clothed in bright colors.

AT CENTER STAGE, the CURTAIN rises, revealing a majestic set for *The Elopement from the Seraglio*. The MUSIC swells as the audience’s chatter fades into an eager silence.

In the audience, WOLFGANG AMADEUS MOZART (26, disheveled genius with bright eyes) sits, fidgeting slightly, unable to hold back a grin. He leans toward CONSTANCE WEBER (24, warm, radiant with pride), seated beside him.

MOZART

(whispering)

This is it, Constance!

Constance clasps her hands, her eyes sparkling with pride.

CONSTANCE

(smiling)

You’ve poured your heart into this, Wolfgang.

The spotlight shines on the performers as they begin their first aria. The MUSIC flows beautifully, resonating through the ornate venue.

Mozart’s expression shifts between joy and apprehension. He leans in closer to Constance, his hand brushing against hers.

MOZART

(anxiously)

What if they don’t understand? What if they don’t feel what I feel?

Constance gives him an encouraging look, squeezing his hand.

CONSTANCE

(firmly)

They will! You’ve created something extraordinary!

The singers perform the first act with zeal, the audience enraptured. Each note seems to bounce with life. The applause between scenes grows louder, and the crowd becomes mesmerized.

At the back of the audience, a group of NOBLES exchange disdainful glances, whispering amongst themselves. One of them, LORD SEEBOT (40, stern-faced with a sharp gaze), leans forward with a skeptical scowl.

LORD SEEBOT

(muttering)

Such a display... Can it really be art?

(pausing, reveals more)

I remember when true music had nobility. Now, a mere commoner can take the stage. Is this the decline of my beloved Vienna?

The IX1 AUDIENCE gasps as the leads sing a powerful duet that crescendos through the hall. Their voices intertwine seamlessly, embodying a love that is equally joyful and tragic.

Mozart’s heart races with each note. He looks at Constance, who watches with admiration on her face that lights up in every moment of the performance.

MOZART

(whispering, excited)

They truly love it!

As the performers reach the end of the act, applause erupts like thunder, and the audience rises to their feet in a wave of admiration.

AUDIENCE MEMBER

(shouting)

Bravo! Bravo!

Constance claps with tears of joy brimming in her eyes, and Mozart stands, awe-struck, with a hand to his chest.

CONSTANCE

(overwhelmed)

Look at them, Wolfgang! They love it!

Mozart turns to her, his face aglow with joy and disbelief.

MOZART

(whispering)

This is for us, Constance.

As the rest of the performance unfolds, the emotional intensity builds, punctuated by laughter and tears, connecting deeply with the audience.

INT. OPERA HOUSE - BACKSTAGE - LATER

Mozart and Constance find themselves backstage, just after the final bow. The sound of applause echoes through the halls, and his fellow PERFORMERS react with exuberance.

PERFORMER

(shouting)

You did it, Wolfgang! You created magic!

Mozart, still buzzing with excitement, turns to Constance, pulling her into a tight embrace, lifting her slightly off the ground.

MOZART

(ecstatic)

We did it!

Constance laughs, burying her face in his shoulder, filled with pride.

CONSTANCE

(whispering)

You found your voice among the stars!

He pulls back, their eyes locking, and in that moment, a deeper understanding passes between them.

MOZART

(seriously)

This success... It means so much more than just applause. It means I can finally live free... and create.

In the background, their fellow artists celebrate, but for Mozart and Constance, time seems suspended as they share this moment of triumph.

CONSTANCE

(tearfully)

You deserve this happiness, Wolfgang.

Mozart looks around, taking in the vibrant energy surrounding them—the buzz of excitement, the laughter, the joy of his colleagues sharing this success.

MOZART

(pensively)

And yet, what will this success bring?

Constance grabs his shoulders, grounding him.

CONSTANCE

(passionately)

We will face it together, just as we always have.

Mozart smiles, reassured, and they share a lingering kiss. The sound of an enthusiastic audience begins to fade, heralding the dawn of a new chapter.

FADE OUT.

TEXT ON SCREEN: What does this newfound success hold for Mozart's future?

[Act 3-Scene 4]:

INT. MOZART'S COMPOSER STUDIO - VIENNA - DAY - SEPTEMBER 1791

A room filled with the frantic energy of creativity. Sheets of music paper are strewn across a wooden table, a small candle flickers, illuminating the face of WOLFGANG AMADEUS MOZART (35, a brooding, genius composer), who appears both frail and animated.

The window is slightly ajar, and the soft sound of a distant orchestra tuning wafts in, echoing the excitement of the impending premiere of 'The Magic Flute.'

*FLASHBACK TO:*

A series of quick memories flash before Mozart’s eyes:

- A YOUNG WOLFGANG enthralled at the piano, playing alongside LEOPOLD (his father), his little fingers dancing across the keys.

- A YOUNG MOZART, starry-eyed, performing for MARIA THERESA, receiving applause.

- A DOWNTRODDEN MOZART receiving cold words from his peers, accompanied by the sound of his BREAKING STRINGS of his violin.

*BACK TO SCENE*

Mozart winces, putting his head in his hands. CONSTANCE WEBER (24, devoted yet anxious) enters, holding a bouquet of flowers. Her eyes reveal a blend of admiration and concern.

CONSTANCE

(softly)

Wolfgang, you must rest. This is your moment!

Mozart barely looks up, his brow furrowed as he scribbles furiously.

MOZART

(a tremor in his voice)

I can’t... I need to capture it—this magic we’ve created.

(pause)

What if it fails?

Constance kneels beside him, placing a reassuring hand on his shoulder.

CONSTANCE

(gently)

It won’t fail. Your music is the language of the heart.

He pauses, looking at her, where the light of hope flickers within her eyes.

MOZART

(voice cracking)

But what if it’s my last? What if my illness takes me before I finish 'The Magic Flute'?

(sudden panic)

What if I cannot finish this opera? What if my illness steals my last chance to leave a legacy for you?

Her expression tenses, her smile fading slightly as she remembers his health struggles.

CONSTANCE

(struggling with her emotions)

Don’t speak like that. You must fight, Wolfgang. Think of our future, your music, the legacy we’ve built together.

A beat. Mozart’s gaze drops to the sheet music, bittersweet realization hitting him.

MOZART

(sighs)

My triumphs... they come at a cost. I fear for you, Constance. What if I cannot be there for you?

MOZART

(pausing, deep in thought)

What if my body fails me before I can leave my mark with 'The Magic Flute'? I fear this may be my last chance to create something that endures.

*FLASHBACK TO:*

A dimly lit room where he lays weak, battling a fever, letters of debts and despair cluttering the table.

CONSTANCE (V.O.)

You are a visionary. Remember the joy you bring through your art!

*BACK TO SCENE*

Mozart runs a hand through his hair, frustration burning deep. He struggles against the growing weight of his illness, but then meets Constance’s gaze again.

MOZART

(determined)

The Magic Flute... it represents hope, love, and enlightenment. It has to be finished.

He pauses, a mixture of pride and sorrow washing over him.

MOZART

(firmly)

I will pour my heart into this... I refuse to be forgotten. I will not leave you alone with this burden.

Constance watches him, heartened by his resolve but wary of his fragile state.

CONSTANCE

(passionately)

Then let us celebrate this moment, my love! Your legacy will live on, no matter what.

Mozart stands and walks to the window. He gazes out at the bustling Vienna streets below, people scurrying, unaware of the weight resting on his soul.

MOZART

(softly)

Vienna will remember me... I shall leave something beautiful behind.

Suddenly, the faint sound of applause from a distant theatre floats in. He closes his eyes, relishing the inspiration it brings.

CONSTANCE

(encouragingly)

Then let this music be our celebration, Wolfgang.

He opens his eyes, turning towards her, a new spark igniting.

MOZART

Yes! For every note, every pause... it shall resonate with every heartbeat in this city.

A tear glistens in Constance's eye as she sees the fire return to his spirit.

MOZART (CONT'D)

(with resolve)

I will finish the score. This opera... it will be our legacy, for you and for all who need to believe in hope.

They embrace, the weight of the moment shared between them.

CONSTANCE

Together then. Always.

Mozart nods, stepping back, refreshed by her unwavering support. He returns to his desk, the quill in hand, and begins to write.

The CAMERA PULLS BACK, capturing the quiet chaos, the brilliance of a mind at work and a heart pulsing with life amidst the shadows of uncertainty.

FADE OUT.

TEXT ON SCREEN: **Will this masterpiece be Mozart's final triumph?**
