# Supplementary material
Source: ML conference proceedings conference paper supplement (https://openreview.net/forum?id=Sxi6gBtJcI)
Supplement: supplementary_material [file refined_screenplay_3.docx]

The refined_Sreenplay Act 3 of 'Murder_on_the_Orient_Express_Novel_docx':

[Act 3-Scene 1]:

INT. TAURUS EXPRESS - DINING CAR - PRESENT TIME

The opulent dining car of the Taurus Express is bathed in the muted light of early evening, the flickering candles casting dancing shadows upon the mahogany tables. The thick snow falls outside, isolating the passengers from the world. The atmosphere is fraught with tension; the sound of soft whispers and the clinking of silverware is punctuated by the palpable anxiety in the air.

HERCULE POIROT stands at the front of the car, his demeanor calm but serious, his sharp eyes scanning the faces of the twelve passengers seated around the tables. They look back at him, a mixture of curiosity and dread etched on their features.

POIROT

(lifting a hand for silence)

Mesdames et Messieurs, I have called you here for a matter of the utmost importance. We must confront the truth surrounding the recent... événements.

The dining car falls silent, all eyes on Poirot.

POIROT (CONT'D)

The murder of Samuel Ratchett was not merely one man’s folly, but rather... a collective conspiracy—a careful orchestration of retribution.

He pauses dramatically, gauging the reactions. A palpable tension thickens the air.

M. BOUC

(leaning forward, anxious)

What do you mean by 'collective conspiracy', Poirot?

POIROT

(sternly)

I have gathered evidence—pieces of a puzzle that I now lay bare before you. Each of you has a part in this sordid tale—a link to the Armstrong case.

MRS. HUBBARD shifts uncomfortably in her seat, her hands trembling slightly.

MRS. HUBBARD

(defensively)

What evidence could you possibly have against us? We are innocent!

POIROT

(turns to Mrs. Hubbard, voice softening)

Ah, Madame, but innocence is rarely absolute in the face of justice.

He unfurls a collection of carefully arranged photographs and documents laid out on the table. The picture of a little girl, DAISY ARMSTRONG, comes into view, and an audible gasp spreads through the car.

POIROT (CONT'D)

Hear the echoes of the past, hidden beneath the weight of your conscience. Each of you bears a shadow—a connection to that tragic night.

The tension grows, thick as fog in the air.

MARY DEBENHAM suddenly stands, her face pale, her voice trembling but urgent.

MARY

(with anguish)

I never meant for it to go this far, Poirot. The pain... it haunts each of us.

POIROT

(voice steady, commanding)

Speak, Mademoiselle, if your heart compels you.

MARY

(catching her breath, emotions swelling)

I knew Daisy. I was there when—when they took her. We all felt powerless. It was a moment of weakness, a desire to correct the wrongs...

POIROT

(leaning in, eyes narrowing)

A moment of weakness indeed. But was it only that? Or was it the anger that drove you all?

The cabin buzzes with murmurs as the passengers exchange uneasy glances.

COLONEL ARBUTHNOT

(defensive, rising)

You’re not accusing us, Poirot! This is madness!

M. BOUC

(nervously but encouraging)

Let us hear what the lady has to say.

POIROT

(leaning in, voice urgent)

Tell me, Mademoiselle. What drove you to such despair?

MARY

(more composed but trembling)

I didn’t grasp the weight of our actions, Colonel. But when I heard Ratchett... Cassetti's laughter—it filled me with rage to think about all that had happened.

POIROT

(urgently)

That rage, it compelled you all, did it not? Speak your truth!

The cabin grows quiet, the tension mounting further as GRETA OHLSSON, visibly shaking, hangs her head.

GRETA

(voice cracking)

We were all powerless... Until that night.

Suddenly, JACK, who had been silent, rises with visible panic on his face.

JACK

(breathlessly)

I... I don’t want to be here! This was not how it was supposed to go! We were supposed to confront him, not... not this!

POIROT

(turning to him, voice steady)

Fear is a powerful force, Jack. But to deny the truth only deepens your torment. Speak! Let it out!

JACK

(trembling)

I thought we were making things right! But I feel... I feel like I’m drowning in this guilt!

POIROT

(nodding, understanding)

Exactly, Jack. This burden you feel, it is shared among you all. You are not alone in this.

A sudden spark ignites in GRETA's eyes as she raises her voice, battling with her tears.

GRETA

(overwhelmed)

I too kept silent, afraid of what this would mean! Cassetti took so much from us, and I thought...

EDGAR interrupts, his emotions breaking free.

EDGAR

(shouting)

It is true! I struggle with my part. I didn’t want to, but Daisy's fate... it haunts me!

POIROT

(turning to him with intensity)

So you confess! You were part of this pact?

EDGAR

(breathless, dark realization dawning)

Yes, I was! I thought... I believed we could save others.

Just then, ANNA, another once-silent passenger, speaks up, overwhelmed by the mounting tension.

ANNA

(voice breaking)

I—I tried to stay out of it! I was so confused and scared! But I too felt that anger, that desire for justice. Cassetti took everything from us...

The atmosphere intensifies, and it becomes clear that the truth is bubbling to the surface. The passengers, one by one, lean forward in their seats, as if compelled to unearth their truths.

POIROT

(voice rising)

Speak, all of you! Share your truth! Only in revealing will you be free!

MRS. HUBBARD, now desperate, stands up.

MRS. HUBBARD

(bravely)

I acted out of love! We all loved her.

A murmur circulates around the table, signaling acceptance of the idea that love drove their actions.

POIROT

(gesturing for calm)

This is but the beginning, mes chers amis. Let your burdens be shared. Each truth revealed brings clarity.

JACK, standing at the edge of his seat, finally finds his voice.

JACK

(fearfully)

I—I don't know what will happen next. I feel so lost. What if we’re blamed?

POIROT

(with understanding)

You will be seen. You are not alone in your fears. It is in the truth that you shall find your footing. Speak your heart.

The passengers, now united by shared emotions, nod and murmur agreement, urging each other to reveal their darkest secrets. The tension between the truth and their fears hovers as they linger on the precipice of confession, uncertain of what will emerge from this storm of guilt and regret.

FADE OUT.

[Act 3-Scene 2]:

INT. TAURUS EXPRESS - DINING CAR - PRESENT TIME

The opulent ambiance of the Taurus Express dining car contrasts sharply with the tension among the passengers. Snow swirls outside, creating an isolated cocoon. Flickering candles cast soft light on the polished tables, reflecting the myriad emotions swirling within.

HERCULE POIROT sits at a table, his finger tapping lightly against a carefully arranged stack of evidence. His brows knot as he looks up, absorbing the weight of the moral quandary at hand. Pausing, he gazes into the distance, the flicker of memory crossing his expression.

In front of Poirot, MRS. HUBBARD and MARY DEBENHAM exchange anxious glances. The atmosphere is thick with unspoken words, the air charged with a sense of collective guilt.

POIROT

(turning his gaze between the two women)

"Madame Hubbard, Mademoiselle Debenham – together, you have borne a heavy truth."

MRS. HUBBARD

(with tremors in her voice)

"It was never meant to come to this, Mr. Poirot. We believed..."

(pause, eyes glistening)

"We believed we were seeking justice for Daisy."

MARY

(interjecting, her voice strained)

"Justice, yes! But at what cost? Our actions… they confound even me."

POIROT leans forward, his expression thoughtful, channeling his inner turmoil.

POIROT

"Ah, but that is the crux of the matter, no? We speak of justice compelled by deep wounds. But at what threshold do we shift from justice to vengeance?"

He gestures to the other passengers, who listen intently, caught in the gravity of their situation. M. BOUC observes with a furrowed brow, deep in contemplation.

M. BOUC

(rising slightly, voice firm)

"Poirot, this is more than a philosophical discussion. A man is dead! We must be precise—who among us is to be held accountable?"

POIROT

(nods solemnly)

"Every soul here carries the weight of that very question. You all conspired in a moment of passion, of loss…"

(turning to Mary)

"Would you tell me, Mademoiselle Debenham, how it began?"

MARY hesitates, tears brim in her eyes, but the resolve to speak allows her to exhale deeply.

MARY

(breathing in, then speaking with urgency)

"It started with whispers, a conversation echoing through our hearts. Ratchett's voice taunted us; his past came crashing back with a vengeance."

(looks pointedly at Mrs. Hubbard)

"We felt... compelled to act, as if guided by the spirits of those wronged."

POIROT

(voice steady but insistent)

"But your actions transformed into shadows… shadows that darkened your souls. It is not merely the end that justifies the means, Madame; it is the heart of the act itself that defines us."

The tension in the dining car morphs into palpable fear. The passengers exchange looks of disbelief and regret, feeling their united front crack beneath Poirot’s piercing observations.

MRS. HUBBARD

(trembling, as if awakening)

"But we are not criminals! We were avengers, protecting the memory of our precious children…"

POIROT

(interrupting, voice raised)

"Yet, revenge does not wash the stains away! It creates new offenses, and we become the very monsters we sought to eradicate."

The emotional outburst reverberates through the car, the gravity of Poirot’s words echoing in the silence.

MARY

(voice breaking)

"What can we even say to justify our pact? I know the risks, yet I feel an inexplicable connection with the others. What does that make me?"

POIROT watches her intently, the gears of his mind whirring. He stands, pacing the narrow corridor, viscerally contemplating the fractured nature of justice.

POIROT

"As I weigh the judgment before me, I am caught between the scales—between what our hearts demand and what our ethics dictate."

(turning to the passengers)

"Yet if the law is to serve justice, must it not also protect the innocent from the wrongdoing of angry hearts?"

He pauses, staring into the distance, recalling a memory of his own past, where he, too, had to wrestle with the concepts of revenge and justice in a time of personal grief.

POIROT

"I remember a time, many years ago, when I too was burdened with rage over a tragedy. I thought my choices were noble, justified... but they led only to darkness and solitude. I nearly lost my way."

The lines on his brow deepen as the weight of his confession hangs heavy.

POIROT

(softly, almost to himself)

"Justice must not be a weapon of the past; it should be a lantern guiding us forward. Would your loved ones return if you sought revenge?"

(turning back to them, resolute)

"Perhaps the truth lies not in absolution but in recognizing our shared burdens. And I must ask again... does this bring peace, or does it only nourish the scars of loss?"

Mrs. Hubbard lowers her head, the emotional toll of Poirot’s questions hanging heavily in the air.

MRS. HUBBARD

(faltering)

"I never thought—I never wanted to harm anyone, only to... avenge."

POIROT

(leaning in slightly)

"What you have done cannot be undone—but your journey to redemption must begin, or risk being entrapped by the very darkness you sought to expel."

The ambiance in the dining car becomes charged with unresolved emotions, as the passengers shift uncomfortably, grappling with their intertwined fates.

POIROT

(closing his eyes for a brief moment)

"Understand this: Justice is not a solitary path; it is a tapestry woven from our actions, our regrets, and our hopes."

(raising his head, determination in his voice)

"I shall contemplate your fates. But know this—you cannot lay the blame upon circumstances; it is upon us, bound by the choices we make. What shall you carry with you as your burden from this moment on?"

The camera captures Poirot’s intense gaze as it shifts across the troubled faces of the gathered passengers. Each one wrestles with their conscience, as Poirot's unresolved thoughts loom over them all.

POIROT

(turning slightly, voice low)

"It weighs heavily upon me, this knowledge. I must gather my thoughts and compass my resolve before the truth can be unveiled. Let us not forget the heart of this matter: what is it we truly desire, justice or closure?"

FADE OUT.
