# Supplementary material
Source: ML conference proceedings conference paper supplement (https://openreview.net/forum?id=Sxi6gBtJcI)
Supplement: supplementary_material [file Sample Questionnaire.docx]

This is a questionnaire designed to evaluate the quality of a screenplay adapted from a novel. Below, you will read a logline of the novel's paragraphs and two screenplay excerpts, and then choose the screenplay excerpt that you believe best fits the description for each question. Please carefully consider each question and choose the option that best reflects your feelings (please try to choose one from the provided adapted script sections).

**Novel Logline:**

Wolfgang Amadeus Mozart, born on January 27, 1756, displays extraordinary musical talent from a young age. Leopold, while teaching music to Wolfgang and his sister Nannerl, notices their exceptional gifts. He dedicates himself to nurturing their talents.

**Script A: Script B:**

INT. MOZART FAMILY HOME – DAY

LEOPOLD MOZART (a composed, middle-aged man with a commanding presence) is sitting at the harpsichord, playing softly. NANNERL MOZART (11 years old, eager and attentive) watches her father closely as WOLFGANG MOZART (5 years old, lively and curious) stands beside her, his wide eyes glued to the instrument. Leopold stops and turns toward his children.

LEOPOLD

(smiling warmly)

Nannerl, it’s your turn. Play what we practiced.

Nannerl eagerly sits at the harpsichord and begins playing a lively melody. Her fingers move smoothly over the keys, but Wolfgang’s focus sharpens, watching closely.

LEOPOLD

(encouraging)

Good, Nannerl. Keep your wrist steady.

Nannerl adjusts her wrist, continuing to play with increasing confidence. Wolfgang steps closer to the harpsichord, his eyes now following the movement of Nannerl’s hands.

WOLFGANG

(excited, pointing to the keys)

Papa, I want to play too!

Leopold chuckles and looks at his young son.

EOPOLD

(half-joking)

Wolfgang, you’re still too small. First, listen and learn.

Wolfgang, frowning slightly, looks at Nannerl's fingers, determined.

NANNERL

(teasing)

Maybe when you’re older, Wolfgang.

Wolfgang watches silently, then suddenly reaches out and touches a key after Nannerl finishes her piece. The note he plays blends perfectly with the last note of Nannerl’s performance.

…

ANNA MARIA

(placing a hand on his arm)

Then we must guide him carefully.

Leopold looks at her, his resolve strengthening.

LEOPOLD

We will. The world needs to hear what he can do.

They walk back toward the house, the sound of Nannerl and Wolfgang laughing faintly in the background.

FADE OUT.

INT. SALZBURG - LEOPOLD MOZART'S STUDY - DAY

A sun-drenched room filled with musical scores, instruments, and the sound of a CHERUBIC melody wafting through. Lively drawings of music notes hang on the walls.

YOUNG WOLFGANG AMADEUS MOZART (6, bright-eyed and spirited) sits at a small harpsichord, his fingers dancing over the keys. His face radiates intense excitement and fervor as he loses himself in the music.

LEOPOLD MOZART (40s, proud but visibly anxious), his father, stands nearby, observing with a blend of admiration and worry. He clutches a sheet of music in his hand, ready to guide but also struggling with the weight of his son’s prodigious talent.

LEOPOLD

(encouraging but firm)

That’s it, Wolfgang! Feel each note, let them soar!

Wolfgang stops abruptly, his gaze turning to his father, eyes alight with curious ambition.

WOLFGANG

(innocently, bubbling with eagerness)

Papa, do you truly think I’m good? It’s like I’m soaring through the clouds!

Leopold kneels beside Wolfgang, placing a gentle hand on the boy's shoulder.

LEOPOLD

(smiling, genuinely)

Good? Wolfgang, you’re a marvel! You’re already breathing life into notes!

He gestures toward some framed compositions hanging on the walls, the legacy of famous composers.

LEOPOLD (CONT'D)

One day, people will look upon your name just as they do these...

As Wolfgang’s eyes wander to a portrait of BACH, a quiet “wow” escapes his lips. The boy's heart races with a fierce ambition.

…

Their laughter fills the room, a warm melody of sibling affection amidst the backdrop of Leopold’s watchful eye.

The music crescendoes as Wolfgang beams with sincerity, ready to conquer his father’s world of music.

CUT TO:

INT. SALZBURG - LEOPOLD’S STUDY - LATER

Leopold stands now, pacing as he jots notes feverishly, the weight of his son’s future hanging heavy. Wolfgang has picked up a VIOLIN, curiously testing the strings.

**Questions:**

1. Which screenplay excerpt makes you more eager to know what happens next?
2. Script A
3. Script B
4. Both
5. Neither
6. Which screenplay excerpt better captures your attention and immerses you in the story?
7. Script A
8. Script B
9. Both
10. Neither
11. Which screenplay excerpt has more natural and smooth plot transitions?

A. Script A

B. Script B

C. Both

D. Neither

1. Which screenplay excerpt has less jarring scene transitions?

A. Script A

B. Script B

C. Both

D. Neither

1. Which screenplay excerpt feels more like it was written by a human screenwriter?

A. Script A

B. Script B

C. Both

D. Neither

1. Which screenplay excerpt has more natural dialogue that aligns with how people typically express themselves?

A. Script A

B. Script B

C. Both

D. Neither

1. Which screenplay excerpt uses more precise language and appropriate word choices?

A. Script A

B. Script B

C. Both

D. Neither

1. Which screenplay excerpt has a more elegant grammatical structure?

A. Script A

B. Script B

C. Both

D. Neither

1. Which screenplay excerpt presents smoother emotional changes in characters, without feeling abrupt?

A. Script A

B. Script B

C. Both

D. Neither

1. Which screenplay excerpt has more natural pacing transitions?

A. Script A

B. Script B

C. Both

D. Neither

1. Which screenplay excerpt feels more like it was generated by AI?

A. Script A

B. Script B

C. Both

D. Neither

1. Which screenplay excerpt follows the standard format for screenplays more closely?

A. Script A

B. Script B

C. Both

D. Neither

1. Which screenplay excerpt aligns more closely with the overall story outline?

A. Script A

B. Script B

C. Both

D. Neither

1. If you have any suggestions or opinions, welcome to share them.
