# Supplementary material
Source: ML conference proceedings conference paper supplement (https://openreview.net/forum?id=Sxi6gBtJcI)
Supplement: supplementary_material [file screenplay_1.docx]

The Sreenplay Act 1 of 'Fight_Club_Novel_docx':

[Act 1-Scene 1]:

EXT. PARKER-MORRIS BUILDING - ROOFTOP - CLOUDY DAY

The protagonist stands at the edge of the rooftop, the wind ruffling his hair as he stares down at the bustling city below. Snowflakes drift quietly through the air around him. Clouds loom overhead, casting shadows over the concrete jungle that seems so distant yet omnipresent.

The PROTAGONIST (30s) looks pale and shaken. His hands tremble slightly as he holds a gun pressed against his mouth, the cold metal an uncomfortable reminder of the moment.

TYLER DURDEN (30s), a darkly charismatic figure, stands close by, a sly grin etched on his features. His energy is electric, intoxicating.

TYLER

The first step to eternal life is you have to die, right?

The protagonist swallows hard, his eyes darting nervously over the edge of the building.

PROTAGONIST

Tyler, this isn't fun. This is...

TYLER

(cutting him off)

Fear. It’s just fear. Confront it.

The protagonist's breathing becomes labored as his emotions swirl. He can hear the faint hint of cheering from the crowd below.

PROTAGONIST

But what about... what about the people down there?

Tyler steps closer, his voice lowering conspiratorially.

TYLER

Look closely. They’re all the same as you. Scared. Lost. Chained to their lives.

The protagonist flinches, memories of BOB (40s), from his support group, fill his thoughts. Bob's strong arms wrapping around him, the warmth of genuine comfort.

PROTAGONIST (V.O.)

(reflective)

Bob... always told me I wasn't alone. We're here for each other, he said.

Suddenly, the timer on Tyler's phone starts BEEPING, an ominous countdown echoing against the rooftop's surface.

TYLER

(encouragingly)

You have strength in your vulnerability. Maybe you’ll become a legend.

The protagonist's grip tightens around the gun, and a flicker of doubt flashes across his face.

PROTAGONIST

Legends die, Tyler. They disappear from the world.

The BEEP grows louder, resonating in his ears. The sound feels like a heartbeat quickening the tempo of his rising dread.

TYLER

Legends leave a mark. We will not die unnoticed.

The protagonist closes his eyes tightly, the image of Bob's supportive embrace still vivid in his mind. A tear escapes down his cheek.

PROTAGONIST

(voice trembling)

I need to talk to someone. I want to be more than this.

Tyler’s expression shifts slightly, both fearless and understanding, pushing back against the weight of the impending countdown.

TYLER

You think Bob would want you to end it? Stand up! Rewrite your story!

Tyler's voice carries an intense conviction that grips the protagonist. The rooftop air thickens with tension, as the urgency of the timer leads them to the brink of an unimaginable choice.

PROTAGONIST

(a vulnerable whisper)

I don't want to fall into nothingness...

Pressing the gun harder against his mouth, his fingers quiver. The timer DINGS; the moment is here.

TYLER

You first, or you can let go. What’ll it be, my friend?

The protagonist gulps, the conflict of emotions swirling within him. He still holds the gun, but suddenly finds himself torn between the reckless allure of chaos and the warmth he felt with Bob.

PROTAGONIST

(resolutely)

I choose life.

He slowly removes the gun from his mouth, shaking slightly, but staring defiantly at Tyler. A moment of revelation.

TYLER

Welcome back, soldier.

The thunder of a sudden blast echoes from below, shaking the rooftop, and shattering their moment. The protagonist looks over the edge, adrenaline racing through his veins as realization dawns.

PROTAGONIST

(panicked)

What did you do?!

Tyler's grin widens, the chaos below intensifying, fueling the reckless energy surrounding them.

TYLER

We make legends, remember?

As chaos erupts, the protagonist stands at the edge, a mix of dread and exhilaration. The storm of emotions swirls, and he stands before a decision that could redefine his life.

FADE OUT.

[Act 1-Scene 2]:

INT. KORNER MART - MIDNIGHT

The fluorescent lights flicker sporadically, casting erratic shadows across the dimly lit aisle filled with empty shelves and scattered merchandise. The hum of the refrigerator units fills the silence, interrupted only by the distant sound of a clock ticking.

At the center of the chaos stands the PROTAGONIST (30s), disheveled hair, wild eyes — a look of desperate intensity etched across his face. He holds a gun tightly in his trembling hand, aimed at RAYMOND HESSEL (early 20s), a frightened young man with wide eyes and a clammy forehead, drenched in panic.

PROTAGONIST

(voice low, intense)

Close your eyes, Raymond. Just close them.

Raymond's lips quiver, the gun mere inches from his face. He shakes his head, trying to make sense of the situation, his breath quickening.

RAYMOND

(whimpering)

Please… don’t. I haven’t done anything...

The protagonist cocks his head and steps closer, the gun steady in his grip.

PROTAGONIST

(more forcefully)

That’s right. You haven't done anything! Just imagine it, all the things you want to be, the choices you could make...

He steps to the side, exposing a view of the empty store, the flickering lights reflecting the chaos in his own mind.

PROTAGONIST (CONT'D)

Picture your life, Raymond. Picture it.

Raymond gulps, his eyes darting between the gun and the protagonist's face, searching for humanity behind the madness.

RAYMOND

(voice trembling)

I… I want to be a graphic designer. I want to... help people.

The protagonist’s expression betrays a flicker of understanding, the weight of Raymond's desperation striking him.

PROTAGONIST

(guilty but resolute)

That's right. A graphic designer. But right now, you’re staring down the barrel of this gun...

He gestures with the gun, emphasizing the gravity of the moment. The room feels smaller, the stakes higher.

PROTAGONIST (CONT'D)

If you think about it... this is the most alive you've ever been.

Raymond's breathing becomes erratic, a bead of sweat rolling down his temple. He fights to regain his composure, eyes locking onto the protagonist’s with defiance mixed with fear.

RAYMOND

(steadying himself)

You're wrong! I don’t want to die — I want a future. Everyone deserves a shot!

The protagonist flinches at Raymond's words, the guilt flooding back with full force. He begins to shake, the power he felt slipping away, replaced by overwhelming dread and confusion.

PROTAGONIST

(voice cracking)

You've got it all wrong. I want to give you a future, but this... this chaos, it’s drowning me!

He lowers the gun slightly, the struggle visible in his eyes. Raymond senses the shift, his fear turning to cautious hope.

RAYMOND

(earnestly)

You’re not a monster. You’re just... lost.

With a shaky hand, the protagonist wipes away a tear streaked with frustration and regret.

PROTAGONIST

(torn)

Lost? Or have I just realized my power?

He raises the gun again, but this time, it’s not aimed at Raymond – it’s a challenge to his own psyche.

PROTAGONIST (CONT'D)

You ever think about what it means to live? No chains, no fears?

RAYMOND

(insistent)

To live is to embrace everything: the pain, the joy. But not like this! Please!

The protagonist stares deeply into Raymond's eyes, searching his own soul with tormented intensity. The gun shakes in his grip, heavy with more than just violence — it bears the weight of his doubt.

PROTAGONIST

(voice breaking)

What if I’m beyond saving, Raymond?

RAYMOND

(gentle but firm)

Then change the narrative! It’s not too late!

The words resonate through the protagonist, stirring something deep inside him. A moment of understanding, of clarity. The chaos swirling around them begins to recede.

PROTAGONIST

(resigned, whispering)

Is there hope, really?

In a moment of vulnerability, he lowers the gun, the tension in the air thick and heavy.

PROTAGONIST (CONT'D)

(trembling)

I don't want to be the man who kills you…

He finally drops the gun onto the floor, the metallic clatter echoing through the silent store like a distant gunshot.

RAYMOND

(breathtakingly relieved)

Thank you...

The protagonist slumps to his knees, the weight of his choice settling over him in waves.

PROTAGONIST

(voice hollow)

What... now?

RAYMOND

(breathlessly)

Now, we find our way—together.

Raymond approaches cautiously, cautiously extending a hand towards the protagonist, breaking through the final barriers of their chaotic moment.

PROTAGONIST

(looking up)

Together…

The camera pulls back, revealing the disarray of Korner Mart, an emblem of their tumultuous journey now shifting toward redemption.

FADE OUT.

[Act 1-Scene 3]:

INT. KORNER MART - MIDNIGHT

The scene opens with a lingering shot of the fluorescent lights overhead, some flickering intermittently, as they cast a jarring glow over the chaotic remnants of the store. Empty boxes lay strewn across the floor, and distant sounds of late-night traffic leak through the glass storefront, emphasizing the void within the mart.

The PROTAGONIST (30s), appears gaunt and disheveled, his shirt stained and hair unkempt. He stands near the abandoned checkout counter, visibly shaken by the recent confrontation. He stares blankly at the walls, replaying the harrowing events in his mind. Shadows dance across his face, revealing a mix of guilt and shame.

PROTAGONIST

(muttering to himself)

What have I become?

His grip involuntarily tightens on the gun, now lying discarded on the floor between his feet—a stark reminder of the life-altering moment that just took place. He kneels down and picks it up, examining it with trembling hands, wrestling with a tempest of emotions.

The faint sound of the clock TICKING echoes, each second adding weight to his internal conflict. He hears the faint rustle of the store's plastic bags, their sound drowning in his mind as memories flood back.

FLASHBACK - INT. KORNER MART - MOMENTS AGO

In an intense standoff, the Protagonist, with wide, desperate eyes, towers over RAYMOND HESSEL. The moment is palpable, the horror and fear etched on Raymond’s face.

RAYMOND

(shouting)

You’re not a monster!

PROTAGONIST

(choked with emotion)

But what if I am?

The scene fades back to the present, where the Protagonist snaps out of his reverie.

BACK TO SCENE

He runs a shaky hand through his hair, his breath coming in ragged gasps as if fighting against the very air around him.

PROTAGONIST

(voice rising)

I thought I had control!

Frustration overwhelms him, and he kicks the empty cereal box ahead of him with a violent CRUNCH, the sound ricocheting through the hollow store.

PROTAGONIST (CONT'D)

(voice breaking)

But it’s just chaos… everything’s chaos!

His words echo into the silence, unanswered. He takes a moment to compose himself, closing his eyes and leaning against the cool metal of the counter. Memories of the frantic moments replay in his mind—Raymond’s pleas, the fleeting glimpse of hope in his eyes, and finally, the weight of his own failure.

The clock TICKS again.

PROTAGONIST

(barely whispering)

No more violence...

His resolve falters as his voice breaks. Suddenly, he hears a SOFT SOUND behind him— the rustling of packs of gum. He turns to see a YOUNG GIRL (10) standing a few feet away, holding a crumpled candy wrapper, eyes wide but devoid of fear.

YOUNG GIRL

(innocently)

Is everything okay, mister?

The Protagonist staggers back, surprised and then quickly gains his composure. He wipes his face, trying to mask his turmoil.

PROTAGONIST

(shakily, forcing a smile)

Yeah, everything’s fine... just... taking a break.

YOUNG GIRL

(confidently)

You look sad.

Her genuine concern cuts through the darkness of the night. The Protagonist swallows hard.

PROTAGONIST

(taking a steadying breath)

It’s okay to feel sad, you know?

YOUNG GIRL

(nodding seriously)

Mom says sadness is like rain. It helps the flowers grow.

His eyes widen at her wisdom, an unexpected moment of clarity emerging from the innocence of her words.

PROTAGONIST

(earnestly)

You’re right. I... I guess I need to decide what kind of flowers I want to grow, huh?

The Young Girl smiles brightly, a beacon of hope amidst the chaos.

YOUNG GIRL

(cheerfully)

Flowers that smell good!

A delicate moment lingers between them, the seriousness fading. She bounds back to the candy aisle, leaving him with a bittersweet smile as he reflects on her words.

PROTAGONIST

(quietly to himself)

Choose...

The camera pulls back, revealing the Protagonist standing alone amidst the emptiness of Korner Mart, now awash in the newfound understanding that echoes in the cool midnight air.

PROTAGONIST (CONT'D)

(determined)

No more chaos.

He approaches the counter and quickly sets the gun on the surface, step back as if finally banishing an intrinsic darkness.

PROTAGONIST (CONT'D)

(to himself)

What will I choose...?

FADE OUT.
