# Supplementary material
Source: ML conference proceedings conference paper supplement (https://openreview.net/forum?id=Sxi6gBtJcI)
Supplement: supplementary_material [file screenplay_1.docx]

The Sreenplay Act 1 of 'Amadeus_novel_docx':

[Act 1-Scene 1]:

INT. SALZBURG - LEOPOLD MOZART'S STUDY - DAY

A sun-drenched room filled with musical scores, instruments, and the sound of a CHERUBIC melody wafting through. Lively drawings of music notes hang on the walls.

YOUNG WOLFGANG AMADEUS MOZART (6, bright-eyed and spirited) sits at a small harpsichord, his fingers dancing over the keys. His face radiates excitement and fervor as he loses himself in the music.

LEOPOLD MOZART (40s, proud but visibly anxious), his father, stands nearby, observing with a blend of admiration and worry. He clutches a sheet of music in his hand, ready to guide but also struggling with the weight of his son’s prodigious talent.

LEOPOLD

(encouraging but firm)

That’s it, Wolfgang! Feel each note, let them soar!

Wolfgang stops abruptly, his gaze turning to his father, eyes alight with curiosity.

WOLFGANG

(innocently)

Papa, do you really think I’m good?

Leopold kneels beside Wolfgang, placing a gentle hand on the boy's shoulder.

LEOPOLD

(smiling)

Good? Wolfgang, you’re a marvel!

He gestures toward some framed compositions hanging on the walls, the legacy of famous composers.

LEOPOLD (CONT'D)

One day, people will look upon your name just as they do these...

Wolfgang’s eyes wander to a portrait of BACH, his mouth forming a quiet “wow”. The boy's heart races with ambition.

WOLFGANG

(voice soft with awe)

Do you think I could play like him one day?

Leopold’s pride swells but is shadowed by anxiousness.

LEOPOLD

(thoughtful)

If you practice and believe… yes, my child.

Wolfgang leans forward, eyes sparkling with determination. He nods vigorously, returning to his harpsichord, fingers poised to play.

CUT TO:

EXT. SALZBURG STREET - DAY

Outside, a vibrant market bustles with PEOPLE, CHOIRS of street vendors filling the air with lively chatter. Music filters through the noise, and some townsfolk glance towards the MOZART household, curious and intrigued.

BACK TO:

INT. SALZBURG - LEOPOLD MOZART'S STUDY - CONTINUOUS

Wolfgang begins to play again, a joyful minuet that echoes with precision. A few notes falter, but he shrugs off the mistake, flicking a lock of blond hair from his brow with youthful defiance.

WOLFGANG

(determined)

I’ll keep going!

LEOPOLD watches, a mixture of pride and a hint of anxiety etched on his face.

LEOPOLD

(quietly, to himself)

The world awaits, my boy...

His heart swells, though a flicker of fear shadows his pride.

Suddenly, a KNOCK on the OPEN DOOR. NANNERL (10, Wolfgang’s protective sister) enters, her face glowing with admiration.

NANNERL

(enthusiastically)

You’re amazing, Wolfgang!

Wolfgang beams, cherishing her praise.

WOLFGANG

(playfully)

I’ll be the best musician ever!

NANNERL

(teasing)

You better be!

Their laughter fills the room, a warm melody of sibling affection amidst the backdrop of Leopold’s watchful eye.

The music crescendoes as Wolfgang beams with sincerity, ready to conquer his father’s world of music.

CUT TO:

INT. SALZBURG - LEOPOLD’S STUDY - LATER

Leopold stands now, pacing as he jots notes feverishly, the weight of his son’s future hanging heavy. Wolfgang has picked up a VIOLIN, curiously testing the strings.

LEOPOLD

(passionately)

You must channel your genius! Maestro’s must hold a stage.

WOLFGANG

(challenging)

What if they don’t recognize me, Papa?

Leopold’s eyes sharpen as he looks at Wolfgang, determination igniting within him.

LEOPOLD

(firmly)

They will, my son.

The sun casts a golden glow over them as the scene builds to a close, with Wolfgang about to play a brief, yet powerful piece that embodies his spirit. The music begins to swell, echoing their hopes and dreams.

FADE OUT.

[Act 1-Scene 2]:

EXT. VIENNA - ROYAL PALACE - DAY - 1762

A grand day unfolds at the imposing Royal Palace. The sun casts golden rays over meticulously manicured gardens where elegant COURTIERS mingle. The sound of LUSH MUSIC wafts through open windows, beckoning to all in attendance.

In a lavish MUSIC ROOM, adorned with opulent drapery and shimmering chandeliers, YOUNG WOLFGANG AMADEUS MOZART (6, with flaxen hair and bright, expressive eyes) stands before a HARPSICHORD, his small fingers poised to create magic.

LEOPOLD MOZART (40s, father, proud and expectant) stands by, pride mixed with nervous anticipation as he watches his son prepare to perform for the regal audience.

The chamber is filled with MEMBERS OF THE ROYAL FAMILY, MARIA THERESA (50s, commanding yet benevolent), surrounded by her COURT, including her elegant daughter, MARIE ANTOINETTE (7).

LEOPOLD

(whispering, to Wolfgang)

Remember, play from the heart. Feel the music!

Wolfgang nods, taking a deep breath, excitement sparkling in his eyes.

WOLFGANG

(whispering back)

I will, Papa. They’ll love it!

He straightens his posture, glancing at MARIA THERESA, who observes him with an intrigued smirk. Wolfgang begins to play, the enchanting notes flowing gracefully from his fingertips.

EXT. PALACE GARDENS - CONTINUOUS

A few COURTIERS gather outside, intrigued by the melodious sounds emanating from within.

COURTIERS murmur appreciatively, their eyes gleaming with eagerness.

COURTIER 1

(elbowing)

It sounds like precious gold!

COURTIER 2

(nodding eagerly)

Who is the composer?

INT. MUSIC ROOM - CONTINUOUS

Wolfgang plays his heart out, the notes becoming a bright tapestry of sound, soaring above the expectations of the grand gallery. He casts glances toward the Empress, finding inspiration in her attentive gaze.

MARIA THERESA

(smiling, to her court)

Marvelous!

The room explodes in applause as Wolfgang concludes. Wolfgang bows with a boyish grin. He glances sideways, catching LEOPOLD’s breathless pride.

LEOPOLD

(brimming with joy, to Wolfgang)

You were magnificent!

Wolfgang beams, feeling a rush of exhilaration.

WOLFGANG

(excited)

I did it, Papa! They liked it!

The mood shifts as MARIA THERESA stands, her regal presence commanding silence.

MARIA THERESA

(calling out)

Young Mozart, you have astonished us!

Wolfgang's heart skips. His eyes widen at her praise.

MARIA THERESA (CONT'D)

(gesturing)

Come forth, my boy!

Wolfgang steps forward, apprehension intertwining with joy. The COURTIERS look on with admiration.

MARIA THERESA (CONT'D)

(warmly)

Tell me, how does one so young possess such a gift?

WOLFGANG

(boldly)

It’s the music, your Majesty! It speaks to me... and I share what it tells me.

The MARQUIS nods, impressed.

MARIA THERESA

(grinning)

You are destined for greatness!

A buzz of excitement fills the room—whispers ripple among the COURTIERS. LEOPOLD exhales, feeling the weight of responsibility and pride for his son’s burgeoning fame.

LEOPOLD

(to himself, steadily)

This is but the beginning...

As MARIA THERESA gestures to the COURT, Wolfgang’s spirit sings with thrill. Possibilities dance in the air, the hint of an emerging destiny lingers.

WOLFGANG

(under his breath, to himself)

I will be more...

LEOPOLD

(clapping jovially)

Bravo! Bravo, Wolfgang!

The applause intensifies! Wolfgang smiles bigger than ever before, embodying both the child and the savant. The camera captures a close-up of MARIA THERESA as she watches him with keen interest, considering the future of this musical prodigy.

FADE OUT.

[Act 1-Scene 3]:

EXT. MUNICH STREET - DAY - 1763

The bustling streets of Munich are alive with color and sound. Merchants shout their wares, while elegantly dressed CITIZENS navigate through the throngs. The CAMERA PANS to reveal WOLFGANG AMADEUS MOZART (7, tousled hair, bright eyes filled with ambition) walking beside his father, LEOPOLD MOZART (early 40s, stern yet proud), who carries a stack of sheet music.

As they pass a GROUP OF MUSICIANS playing merrily, Wolfgang pauses, entranced by the harmony filling the air. He watches as they perform, a flicker of admiration mixed with an unsettling hint of envy flickering across his youthful face.

LEOPOLD

(noticing Wolfgang’s gaze)

Come, Wolfgang. We have work to do!

Wolfgang reluctantly turns away, but not before casting one last glance at the musicians. A brief spark of jealousy flashes in his eyes.

WOLFGANG

(murmuring)

They’re good...

LEOPOLD

(understanding)

You will be better.

They continue walking through the lively market, Wolfgang wrestling with his thoughts and feelings.

CUT TO:

INT. MUNICH OPERA HOUSE - LATER

A grand venue filled with elegantly dressed AUDIENCE MEMBERS. Wolfgang stands alone on stage, a small figure amongst the grandeur, clutching his violin. The nervous energy crackles through him, creating an electric atmosphere.

The OPERA CONDUCTOR nods to him. Wolfgang takes a deep breath, prepares himself, and begins to play a lively SONATA. His small fingers glide effortlessly, pouring emotion into the music.

The AUDIENCE is captivated, shifting in their seats, some exchanging impressed glances. But amidst the applause, Wolfgang locks eyes with a rival PERFORMER (20s, smug and confident) who smirks at him from the side stage. The smirk freezes Wolfgang in an instant, planting a seed of doubt.

WOLFGANG

(to himself, whispering)

Can I really be as great as them?

He breaks his gaze, focusing on the music, pouring his heart into the performance. The admiration from the audience grows louder, clapping resonating like thunder as he bows graciously at the conclusion.

CUT TO:

INT. BACKSTAGE DRESSING ROOM - MOMENTS LATER

Wolfgang enters, breathless and smiling. The door creaks open, revealing LEOPOLD and PADRE MARTINI (50s, distinguished musician), who stands observing with a contemplative frown.

LEOPOLD

(brimming with pride)

That was magnificent, Wolfgang!

Wolfgang beams, basking in the praise, but senses the tension in PADRE MARTINI's demeanor.

PADRE MARTINI

(carefully)

Yes... impressive. But beware, young one.

Wolfgang’s smile falters, sensing the underlying caution.

PADRE MARTINI (CONT'D)

(emphasizing)

There are many who would see your light extinguished. Talent breeds envy.

Wolfgang looks down, the weight of the words sinking in. He bites his lip, struggling with the shadow of the competition looming over him.

WOLFGANG

(defiantly)

I won’t let them stop me.

LEOPOLD places a hand on Wolfgang’s shoulder, offering comfort.

LEOPOLD

(encouraging)

We will face it together, son. Music is your path, and we will walk it side by side.

With newfound determination, Wolfgang raises his head, driving away the fleeting clouds of envy.

WOLFGANG

(smiling bravely)

I’ll compose something even greater!

Suddenly, there’s a KNOCK on the door. The rival PERFORMER enters, smirking once again.

RIVAL PERFORMER

(mockingly)

Heard you played well today, little Mozart. Hope you’re ready for the next challenge.

Wolfgang narrows his eyes, but LEOPOLD interjects.

LEOPOLD

(sternly)

We welcome competition. It helps Wolfgang grow!

As the rival laughs and leaves, Wolfgang clenches his fists, his emotional turmoil boiling beneath the surface.

FADE OUT.

[Act 1-Scene 4]:

INT. VIENNA - MOZART'S STUDY - DAY - 1768

The room is filled with sunlight streaming through large windows, illuminating scattered sheets of music and a grand piano. WOLFGANG AMADEUS MOZART (12, tousled hair, bright eyes filled with ambition) sits at the piano, his fingers hovering over the keys, a mixture of excitement and anxiety etched on his face.

He glances at a letter on the desk, the royal seal of JOSEPH II glinting in the light. The weight of the commission hangs heavily in the air, a turning point in his young career.

WOLFGANG

(to himself, whispering)

An opera... my first opera.

He takes a deep breath, the thrill of the opportunity battling with the pressure of expectations. He begins to play a few notes, but they falter, his mind racing.

WOLFGANG (CONT'D)

(frustrated)

What if it’s not good enough?

He stands abruptly, pacing the room, his hands running through his hair. The excitement of creation is overshadowed by the envy he senses from his peers, the whispers of doubt creeping in.

WOLFGANG (CONT'D)

(murmuring)

They’ll think I’m just a child... a novelty.

He stops at the window, looking out at the bustling streets of Vienna, where musicians and artists mingle, their laughter and music a constant reminder of the competition.

WOLFGANG (CONT'D)

(determined)

No! I will show them.

He turns back to the piano, his fingers poised over the keys once more. He begins to play a lively melody, the notes flowing with newfound confidence.

WOLFGANG (CONT'D)

(with passion)

This is my moment!

Suddenly, the door swings open, and LEOPOLD MOZART (early 40s, stern yet proud) enters, a concerned look on his face.

LEOPOLD

(noticing Wolfgang’s intensity)

Wolfgang, my boy, you seem troubled.

Wolfgang stops playing, his excitement dimming slightly as he meets his father’s gaze.

WOLFGANG

(hesitant)

Father, what if I fail? What if they don’t like it?

Leopold steps closer, placing a reassuring hand on Wolfgang’s shoulder.

LEOPOLD

(encouraging)

You are a genius, Wolfgang. This is your chance to shine.

Wolfgang’s eyes flicker with uncertainty, but he nods, absorbing his father’s words.

WOLFGANG

(softly)

But the others... they envy me.

Leopold’s expression hardens slightly, a hint of frustration in his voice.

LEOPOLD

(firmly)

Envy is a shadow that follows talent. You must rise above it.

Wolfgang looks down, the weight of expectation pressing on him.

WOLFGANG

(whispering)

I want to be great, Father.

Leopold lifts Wolfgang’s chin, their eyes locking in a moment of understanding.

LEOPOLD

(softening)

Then you must create. Let your music speak for you.

Wolfgang’s resolve strengthens, a flicker of determination igniting within him.

WOLFGANG

(with newfound confidence)

I will compose something extraordinary!

Leopold smiles, pride swelling in his chest.

LEOPOLD

(encouraging)

That’s the spirit! Now, let’s hear what you have so far.

Wolfgang rushes back to the piano, his fingers dancing over the keys, the melody flowing with passion and purpose.

WOLFGANG

(as he plays)

This will be my legacy!

The music swells, filling the room with a vibrant energy, a reflection of Wolfgang’s inner turmoil transforming into creative brilliance.

FADE OUT.
