# Supplementary material
Source: ML conference proceedings conference paper supplement (https://openreview.net/forum?id=Sxi6gBtJcI)
Supplement: supplementary_material [file screenplay_2.docx]

The Sreenplay Act 2 of 'Fight_Club_Novel_docx':

[Act 2-Scene 1]:

EXT. URBAN STREETS - NIGHT

A dimly lit alleyway pulses with the distant thrum of city life. Rain-soaked pavement glimmers under flickering streetlights, pooling into chaotic reflections. Shadows dance as the PROTAGONIST (30s), pale and frayed, wanders through the night, the chaos of Project Mayhem churning in his mind.

He clutches his head with one hand, eyes darting. The muffled sounds of laughter from a nearby bar filter through, reminding him of joyful faces while his own is clouded with dread.

PROTAGONIST

(breathlessly)

What am I doing? Where is Tyler leading me?

He turns sharply, catching a glimpse of his reflection in a puddle. A faint smile catches the corner of his lips but quickly fades, revealing confusion and frustration etched on his face.

As he paces, TYLER (30s), sharp-eyed, perfectly composed, appears from the shadows, leaning against a wall with a devil-may-care grin. His energy contrasts sharply with the Protagonist's turmoil.

TYLER

(with a cocky flair)

You look like you’re about to make a decision.

The Protagonist’s eyes narrow in anger and confusion, torn between admiration and irritation.

PROTAGONIST

(sarcastically)

Is that what this is all about? You leading me to another dead end?

TYLER

(smirking)

No, my friend, this is about liberation. You need to embrace the chaos.

The Protagonist steps back, shaking his head, hands balled into fists.

PROTAGONIST

(frustrated)

Liberation? Is that what you call it? It’s madness, Tyler! People are getting hurt, lives are ruined!

TYLER

(advancing)

Ruined? Or reborn? You’re losing yourself in the mundane, and you don’t even realize it.

The Protagonist clenches his jaw, taking a step, almost as if he’s physically distancing himself from Tyler's influence.

PROTAGONIST

(breath shaky)

I want to control my life, not let it spiral out of control.

TYLER

(darkly amused)

Control is an illusion. You see it, don’t you? The very structure of our reality is falling apart.

The Protagonist looks away, his eyes glossing over with memories unbidden - chaotic fights, stolen moments of euphoria followed by profound despair.

PROTAGONIST

(desperate)

I’m stuck between wanting to fight back and just...

He trails off, the anguish flooding his features. Tyler moves closer, personal, invading.

TYLER

(insistent)

Just what? Give in? It’s easier, isn’t it? To float on the surface while the world burns beneath.

The Protagonist’s breath quickens, the decision weighing on him as tension coils in the air, almost palpable. He runs a hand through his hair, frustration boiling over.

PROTAGONIST

(voice trembling)

I don’t want to float anymore! I just want a normal life!

Tyler cackles, the sound a jarring contrast to the Protagonist's pain.

TYLER

Normal? You’re not made for that. You know deep down that normal is worse than chaos.

The sky overhead rumbles ominously, mirroring the storm raging within the Protagonist’s heart. He turns away, a single, anguished sob escaping his lips.

PROTAGONIST

(barely a whisper)

Why can’t I just be me?

Tyler grabs the Protagonist's shoulders, shaking him with fervor.

TYLER

(with fervent passion)

Because "you" is just a shadow! You have to destroy that version of yourself to be reborn!

As Tyler's words sink in, the Protagonist's expression morphs from sadness to dread. The shadow of a decision looms large over him.

PROTAGONIST

(voice shaking)

Is this what I’m supposed to do? Just give in to your madness?

TYLER

(smiling, inviting)

Not just give in... embrace it! Find your true self in the chaos!

The rain begins to fall harder, each drop like a fleeting beat of his heart aligning with the vehemence of Tyler's proclamation.

PROTAGONIST

(whispers)

But what if I can’t come back?

The thunder cracks overhead, and Tyler’s gaze sharpens with intensity.

TYLER

(with resolute certainty)

Then you’ll see the world in a way you never thought possible.

The Protagonist stares deep into Tyler’s confident eyes, his resolve faltering but curiosity igniting a dangerous flame within him.

PROTAGONIST

(tentatively)

I don’t know...

TYLER

(grinning)

That’s the first step. Start questioning everything. Let’s see how deep this rabbit hole goes.

Tyler releases his grip slowly, and the camera zooms in on the Protagonist's conflicted expression as he grapples with an escalating internal crisis. The world spins around him, chaos creeping closer with every heartbeat.

FADE TO BLACK.

END SCENE.

[Act 2-Scene 2]:

INT. IMAGINED HEAVENLY SPACE - ETERNAL TWILIGHT

The screen is filled with swirling COLORS that pulse and shift, a CHORUS OF WHISPERS echoing through the void. The PROTAGONIST (30s), lost in an ethereal haze, floats amid the fog of his consciousness, surrounded by SHADOWY FIGURES.

Each figure represents a choice—haunting specters of innocence lost—and their whispers intertwine, creating a dense atmosphere of regret.

PROTAGONIST

(voice trembling)

What have I done? Is there still a way back?

His words seem to dissipate into the fog, swallowed by the chaos. Suddenly, MARLA (mid-20s), her face radiant, cuts through the silhouette, shimmering like a beacon.

MARLA

(echoing softly)

You have to confront it. All of it.

The Protagonist's eyes widen, his chest tightening as his surroundings pulse like a heartbeat, illuminating faces from his past—BOB, RAYMOND, each visage a reflection of his choices.

PROTAGONIST

No… I wanted to change. I didn’t mean to hurt anyone…

The figures edge closer, their eyes filled with anguish, their voices a SYMPHONY OF GUILT.

SHADOWY FIGURE

You didn’t care, did you?

Each whisper is a poke at a wound previously ignored. He clutches his head, struggling against the weight pressing down on him.

PROTAGONIST

(shouting)

I thought I was doing something important! Something bigger than myself!

The swirling mist seems to pulse with his rage, the lights flickering like dying stars. He drifts, trapped in this cosmic limbo, forcing himself to see MARLA, who steps forward, her expression fierce and loving.

MARLA

(intense)

Love is a choice too. So is forgiveness. Don't forget, you’re not just a monster.

PROTAGONIST

(desperate)

But how do I… how do I find my way back?

The whispers grow louder, an unending chorus of doubt.

SHADOWY FIGURE 1

You lost everything. You are nothing.

SHADOWY FIGURE 2

They deserved better.

Ethereal LIGHTS flicker above, slices of hope surfacing momentarily but vanishing just as fast. The Protagonist widens his stance, defiance building, a surge of bittersweet enlightenment threading through his being.

PROTAGONIST

(breathing heavily)

NO! I refuse to let this be the end.

The faces around him blur and reform, moving in an indiscernible dance of blame and despair, but he feels MARLA's love anchoring him amidst the chaos.

MARLA

(urgently)

You need to forgive yourself! You have to face the truth!

The weight presses harder, echoing burdens of existence. He closes his eyes, focusing on her presence, the glow of her spirit cutting through the darkness enveloping him.

PROTAGONIST

(whispers)

Is redemption even possible?

The pulsating light encircles him, responding as if the universe itself hesitates to answer. The whispers drop to a hush; silence hangs.

VOICE (GOD)

(with an echoing calm)

Every choice is yours to make. The path of the heart leads to redemption.

His eyes snap open, filling with a determination reflected in the ethereal glow surrounding MARLA. The chaotic fog starts to part, revealing a FLOATING DOORWAY of shimmering light.

PROTAGONIST

(resolutely)

If I go through, can I truly come back?

MARLA

(nodding, hopeful)

It’s your choice. Face the light, face the truth.

He takes a tentative step toward the doorway, the LIGHT growing brighter, illuminating faces of those who were lost in shadow. He can feel the weight of their histories pressing against him, a painful reminder but also a guide.

PROTAGONIST

(whispers, filled with resolve)

I accept my past. I accept my choices.

With newfound courage, he moves forward—hand outstretched—through the doorway, where the light envelops him in brilliance.

SHADOWY HORES

(fading)

You cannot escape the truth…

The echoing voices subside as he vanishes into the blinding glow, leaving the haunting figures behind. The ethereal space melts into a pure white brilliance, leaving only the PROTAGONIST’s soft, determined mantra heard through the chaos.

PROTAGONIST (V.O.)

(gaining strength)

I am ready… I will return…

FADE OUT.

END SCENE.

[Act 2-Scene 3]:

INT. PROTAGONIST'S CONDO - EARLY MORNING

Sunlight filters through the shattered remains of the floor-to-ceiling windows, casting stark shadows across the debris-strewn floor. The room is a chaotic mix of charred furniture, glass, and personal belongings that have been reduced to wreckage.

The PROTAGONIST (30s) stands amidst the ruins, his disheveled hair reflecting his internal turmoil. He clutches his sides, breathing heavily, overwhelmed by the sight of his destroyed home—a mirror of the emotional devastation mirrored within him.

PROTAGONIST (V.O.)

All I wanted was to feel alive, to break free.

But look where that freedom has led me...

He surveys the wreckage, his gaze falling on particularly poignant remnants: a melted, maimed coffee table, fragments of acrid-scented papers, and the remnants of an expensive-looking set of dishes, now ground to powder. He steps forward, carefully navigating through the debris as if stepping through the remains of his own heart.

PROTAGONIST (V.O.) (CONT'D)

Tyler. It was all... him. His need for chaos brought

me here. My possessions, my life—is this what I hoped for?

He kneels, picking up a charred piece of wood. His fingers tremble as he rubs the ash between them, the weight of guilt almost unbearable. The memory of the explosion flashes in his mind, each sound echoing like a gunshot: the rise of flames, the shattering of glass, the frantic screams that no one heard.

PROTAGONIST

(whispering, to himself)

What have I done?

A beat of silence. The realization that his past choices have come back with a vengeance ripples through him—he longs for reconciliation with his own identity, yet it feels utterly out of reach.

Suddenly, a sob escapes him. He pulls himself back, head buried in hands, the chaos lying around him reflecting the chaos in his soul.

PROTAGONIST (V.O.) (CONT'D)

Maybe I was just a slave to my own desires,

and now—now I've lost everything that mattered.

He unearths a crumpled photograph—The Protagonist, Tyler, and Marla at a party. They’re smiling, uncertain smiles, but filled with a sense of camaraderie. His heart aches. He pushes the photograph back, throwing it away from him as if it burned.

PROTAGONIST

(yelling)

I didn't mean to hurt you! Any of you!

Frustration surges within him, mingling with the profound sense of loss. He stands abruptly, tossing aside a broken vase. The ceramic shards scatter across the floor, useless like his hopes.

As he turns away, he glances at the remnants reflecting his decisions—the person he thought he could become, now lost amidst the bills and broken dreams.

PROTAGONIST (V.O.) (CONT'D)

Every choice... leads down a road. I’m at the end of mine.

The DOORMAN appears at the threshold, concern etched on his face. He hesitates, stepping cautiously inside.

DOORMAN

(softly)

Sir, the police need you to come down. They want to talk...

The Protagonist barely acknowledges him, his eyes glazed over, lost in guilt-ridden contemplation. He shakes his head subtly, the implication of loss weighing heavily in the silence.

PROTAGONIST

(a mere whisper)

It’s too late for that...

The doorman’s gaze scans the destruction, and he turns back to the protagonist with mild disbelief.

DOORMAN

You can't just let this... consume you.

PROTAGONIST

(turns fiercely to the doorman)

Consume me? It already has! Look at it!

He gestures broadly at the devastation, rage mingling with sorrow—an urgent plea for understanding in a world that seems devoid of it.

The doorman falters, stepping back slightly as guilt intertwines with his concern.

DOORMAN

You have to confront it. Face what you've lost...

The Protagonist's expression shifts from anger to despair, his voice cracking with vulnerability.

PROTAGONIST

(voice breaking)

Redemption... can I even find it amid these ashes?

Silence fills the room; the weight of consequence permeates every corner. The Protagonist, overwhelmed, looks back at the destruction—chaotic remnants of his former life, each one a testament to his choices.

PROTAGONIST (V.O.)

(determined)

I can't erase the past. But maybe... maybe there’s a way forward.

With a deep breath, he straightens, absorbing the magnitude of the moment. He steps toward the door, leaving the remnants behind—this time not in retreat, but in brave acceptance of his tumultuous journey.

FADE OUT.
