# Supplementary material
Source: ML conference proceedings conference paper supplement (https://openreview.net/forum?id=Sxi6gBtJcI)
Supplement: supplementary_material [file screenplay_2.docx]

The Sreenplay Act 2 of 'Amadeus_novel_docx':

[Act 2-Scene 1]:

INT. ARCHBISHOP'S PALACE - SALZBURG - DAY - 1776

The richly adorned room is steeped in grandeur. Sunlight filters through stained glass, casting colored shadows across the elaborately arranged furniture. WOLFGANG AMADEUS MOZART (20, a slight figure with tousled hair and piercing eyes) stands before ARCHBISHOP JEROME COLLOREDO (50, stern, wearing elaborate clerical robes), clenched fists resting on his hips.

MOZART

(voice steady but trembling)

Your Grace, I can no longer accept these constraints.

I am suffocating in this city!

The Archbishop leans back in his opulent chair, a raised eyebrow betraying a sense of mild amusement.

ARCHBISHOP

(cool)

Constraints, Wolfgang? You are my musician.

You have a respectable position.

MOZART

(frustrated)

Respectable? You limit me to short compositions,

stifling my creative spirit! I need musicians who can match my ambition—and this place is barren!

Mozart paces the floor, his passionate gestures reflecting the turmoil within him. The Archbishop's expression shifts to one of annoyance.

ARCHBISHOP

(firmly)

My duty is to uphold the standards of the Church.

This is not Vienna, nor Italy. You must adapt.

Mozart stops pacing, astonished and agitated. His expression hardens.

MOZART

(defiant)

Adapt? My music deserves to soar!

I have done the best with your limitations—but I cannot grow here!

The Archbishop leans forward, his grey eyes narrowing.

ARCHBISHOP

(coldly)

If you feel so constrained, perhaps you should reconsider your position.

Mozart’s jaw tightens; the emotional stakes rise. He takes a moment to rein in his frustration, drawing a deep breath.

MOZART

(quietly, intense)

I... wish to request permission to leave Salzburg.

I need the freedom to create, to expand my horizon.

For my future—our future...

The tension thickens as the Archbishop studies him, assessing both the defiance and desperation in Wolfgang’s voice.

ARCHBISHOP

(calculating)

And what makes you believe anywhere else would welcome

the likes of you? You think they will understand genius

better than I do?

Mozart’s voice cracks with sincerity, his eyes gleaming with a yearning for artistic freedom.

MOZART

(impassioned)

Yes! I seek to show my true self—to create compositions

that pour from my heart, unbound by the chains of your expectations!

A beat of silence. The Archbishop’s expression flickers—something is stirring, a sense of understanding.

ARCHBISHOP

(measured)

Very well. Write to me formally, and I shall consider your request.

Mozart nods, though doubt lingers in his eyes.

MOZART

(heartfelt)

Thank you, Your Grace.

I long to create music that speaks, not just to the court,

but to the world.

The Archbishop’s features soften slightly, perceptibly. He stands, signaling the end of the meeting.

ARCHBISHOP

(dismissively)

Very well, get on with it then.

Mozart turns, a mix of relief, hope, and unresolved tension clouding his face as he strides toward the door, pausing for a moment.

MOZART

(with urgency)

I will pen my truths—everything I have longed to express...

INT. MOZART’S STUDY - LATER

The room is dimly lit, stacks of unfinished compositions scatter everywhere, revealing the chaos of Mozart’s creative mind. He sits at a desk, feather quill in hand, the parchment before him blank but weighty.

MOZART

(to himself, whispering)

Let this letter be my voice, my plea...

He begins to write fervently, the quill scratching across the paper as he pours out his heart, each word fueled by a determination that flares within him.

MOZART (V.O.)

"Most Gracious Liege-Lord, I dare not trouble your illustrious grace

with minute descriptions of our pitiful circumstances..."

As he writes, montage: glimpses of his life in Salzburg flash through his mind—moments of joy, laughter shared with friends, and stifling solitude in the presence of the Archbishop's dictates...

MOZART (V.O.) (CONT'D)

"Our circumstances are those of urgent need... I beseech

your gracious permission to leave."

He pauses, his hand shaking on the quill, memory flooding in—his father's anxious face, the weight of expectation.

MOZART (V.O.) (CONT'D)

"I owe it to myself and my family to find a place where I can thrive..."

His resolve hardens. He continues writing with renewed vigor.

MOZART

(determined)

I will find my freedom.

FADE OUT.

[Act 2-Scene 2]:

INT. MANNHEIM OPERA HOUSE - DAY - 1777

The grandeur of the opera house is mesmerizing, filled with the soft hum of conversations and the rustle of silk dresses. Natural light streams through the tall windows, illuminating the polished wooden interior and the ornate chandeliers.

WOLFGANG AMADEUS MOZART (21, youthful and fervent with a mop of unruly hair) takes center stage, standing before an audience of nobles and dignitaries, including ELECTOR KARL THEODORE (50, regal and imposing) seated prominently in the front row. A hint of nervousness hangs around Wolfgang, but a fiery determination radiates from his eyes.

Mozart lifts his violin to play, heart racing with ambition. He draws the bow across the strings, unleashing a vibrant melody that dances through the air.

CLOSE ON – MOZART’S FACE

A spark of hope ignites in Wolfgang’s eyes as he loses himself in his music, the notes soaring with the power of his ambition.

CUT TO:

INT. MANNHEIM OPERA HOUSE - BACKSTAGE - CONTINUOUS

The sound of applause reverberates through the building. The stagehands shift nervously as they await the performance's conclusion. In the corner stands CANNABICH (45, a man of authority in the music world, slightly weary but respectful), his expression a mixture of skepticism and admiration.

CANNABICH

(muttering to himself)

An impressive display... but can he sustain this brilliance?

CUT TO:

INT. MANNHEIM OPERA HOUSE - DAY - CONTINUOUS

The applause crescendos as Wolfgang finishes, breathless yet jubilant. He bows deeply as ELECTOR KARL THEODORE claps loudly, a smile breaking across his face.

ELECTOR

(enthusiastic)

Bravo! Young Mozart, your talent is remarkable!

The audience joins in, their claps a thunderous wave of appreciation. Wolfgang’s heart swells, feeling the thrill of acknowledgment.

BACK TO:

INT. MANNHEIM OPERA HOUSE - LATER

As the audience disperses, Wolfgang steps off stage, excitement coursing through him. He catches the eye of the ELECTOR, who raises a hand, signaling for him to come closer.

ELECTOR

(inviting)

Come here, young man!

Wolfgang hesitates, then strides forward with determination.

ELECTOR (CONT'D)

(genuinely curious)

You have a rare gift. Tell me, what are your ambitions?

Wolfgang’s face lights up, the moment he has yearned for finally unfolding.

MOZART

(earnestly)

Your Grace, I aspire to compose operas that resonate with the soul and elevate German music.

The ELECTOR leans in, intrigued.

ELECTOR

(thoughtful)

Ambitious goals indeed. But the path is littered with challenges. Are you prepared for the competition?

Wolfgang nods, a determined smile firming on his lips.

MOZART

(confidently)

I welcome competition, Your Grace. It only sharpens my resolve.

The ELECTOR chuckles, impressed by Wolfgang's spirit.

ELECTOR

(encouraging)

Then make your mark, Mozart! I will see to it that your name becomes known in the courts I influence.

Suddenly, the atmosphere thickens with uncertainty as the nobles around them shift their attention to a distant commotion.

CUT TO:

EXT. MANNHEIM OPERA HOUSE - LATER

A group of musical savants and composers, envious and condescending, congregates outside. Their whispered remarks are laced with malice.

RIVALS (V.O.)

Who does he think he is? Just a boy thinking he can rattle the establishments...

Wolfgang catches wind of their bitterness. The warmth from his earlier triumph now exposes a darker undertone.

INT. MANNHEIM OPERA HOUSE - DAY - CONTINUOUS

Wolfgang stands, heart pounding as the festive atmosphere darkens around him, but he holds a firm grasp on his resolve.

MOZART

(to himself, fierce)

I will overcome!

CUT TO:

INT. MANNHEIM OPERA HOUSE - BACKSTAGE - MOMENTS LATER

As Wolfgang retreats backstage, he encounters CANNABICH, who watches him critically.

CANNABICH

(firmly)

Keep your wits about you, young man. The arts can be cruel.

Wolfgang meets Cannabich’s gaze, unyielding.

MOZART

(resolute)

I am ready.

FADE OUT.

TEXT ON SCREEN: Will Mozart’s ambition secure him a prominent position amidst the rivalry waiting in the wings?

[Act 2-Scene 3]:

EXT. PARIS STREET - DAY - 1778

The bustling streets of Paris are alive with the chatter of townsfolk and the tramping of horses. Vibrant market stalls are laden with fresh produce, brightly colored fabrics, and the sweet scent of baked goods wafts through the air. Sunlight bathes the scene in a warm glow, but a shadow seems to loom over a distinguished figure walking amidst the crowd.

WOLFGANG AMADEUS MOZART (22, disheveled yet passionate) strides through, violin case in hand, his face cast in determination tinged with disappointment. He observes the indifference around him, the laughter and joy of those surrounding him contrasting sharply with the turmoil brewing inside him.

CLOSE ON – MOZART’S FACE

His brow furrows as he glances around. The hope in his eyes dims as he takes in the indifferent reactions of passersby, accustomed to music but not moved by it.

CUT TO:

EXT. CAFE - DAY - CONTINUOUS

Mozart approaches a small cafe where musicians gather, clutching scores but receiving little acknowledgment from the patrons. They converse animatedly, but when he tries to engage, the competitive atmosphere silences him. He takes a deep breath and resolves to share his music, his legacy.

MOZART

(to himself)

They will see. They will feel!

He pulls out his violin, and an eager spark ignites in his eyes as he begins to play a lively sonata. The sound is rich, yet the few patrons merely glance his way before returning to their conversations, uninterested.

CUT TO:

EXT. CAFE - MOMENTS LATER

Mozart finishes the piece, his heart racing, but the silence that follows is deafening. Disappointment floods his face. A NOBLEWOMAN (40s, extravagantly dressed) gives him a dismissive wave, a brief look of disinterest in her eyes before she continues chatting with her companions.

NOBLEWOMAN

(louder than necessary)

Just another street musician.

Mozart's shoulders slump as he lowers his violin. His determination feels like a fragile spark in the wind—a flicker away from dying out.

CUT TO:

EXT. PARIS STREET - NEARBY - CONTINUOUS

MOZART walks away from the cafe, gripping his violin case tightly. The vibrant sounds of the city seem to mock him now, each laugh and lyric a reminder of his struggle for acknowledgment.

MOZART

(determined, to himself)

I will not be silenced! Not here!

He reaches for a piece of parchment amid the chaos of the bustling street, scribbling down a few notes furiously. His mind races with ideas of how to capture the audience's heart.

CUT TO:

EXT. PLACE DE LA RÉPUBLIQUE - LATER

Mozart stands at the edge of the plaza, where a small crowd begins to gather around a street performer. The performer juggles, and laughter echoes. Momentarily entranced, Mozart feels the draw of their joy but realizes he doesn’t have to juggle for attention; his music should speak for itself.

He raises his violin again, this time channeling his disappointment into something fierce—a definitive statement layered with emotion. He begins to play a hauntingly beautiful melody, one that encapsulates his yearning and frustration.

CLOSE ON – THE CROWD

Initially skeptical, the crowd begins to quieten, drawn in by the intensity and passion radiating from Mozart. Faces shift from bemusement to a hopeful curiosity, eyes glistening as they hear the depth of his longing intertwined in the notes.

CUT TO:

EXT. PLACE DE LA R��PUBLIQUE - MOMENTS LATER

The crowd grows as they listen, completely entranced. For the first time, steaks of connection ripple through the audience. They lean closer, heartbeats synchronizing with the music; the lively Parisian spirit starts to embrace him.

A MAN IN THE CROWD (30s, a wiry music enthusiast) steps temporarily forward, his face illuminating with recognition as notes swirl around him.

MAN IN THE CROWD

(loud, enthusiastic)

This is it! This is the music we crave!

Mozart’s eyes widen, recognition washes over him; the invisible wall between him and the audience begins to crumble.

FADE OUT.

TEXT ON SCREEN: Will Mozart's relentless spirit overcome the indifference of Paris? The journey is just beginning.

[Act 2-Scene 4]:

EXT. SEINE RIVER BANK - PARIS - DAY - 1778

The picturesque banks of the Seine glimmer under the warm sunlight. Rows of elegant willows sway gently with the breeze as the bustling Parisian scenes unfold around WOLFGANG AMADEUS MOZART (22, looking worn yet fervently alive), who sits alone on a wooden bench, his violin resting in his lap.

The sound of laughter and chatter fills the air, but for Mozart, the joy around him feels like a muted echo of his internal chaos. He gazes longingly at couples strolling hand-in-hand, their shared happiness only deepening the ache within him.

CLOSE ON – MOZART’S FACE

His expression is a tumult of longing and sorrow. He recalls the dazzling presence of ALOYSIA WEBER (20, striking and earnest), her laughter, her music, and the moments they shared, a bittersweet symphony of devotion and ambition.

MOZART

(quietly to himself)

Aloysia...

The weight of his infatuation lingers in the air, a palpable tension of unfulfilled passion. He touches the violin strings gently, as if seeking solace from the wood and wire, his fingers trembling slightly.

CUT TO:

EXT. SEINE RIVER BANK - CONTINUOUS

Aloysia, dressed elegantly and exuding an air of confidence, glides into view, surrounded by a small entourage of admirers. She is animated, yet pauses to catch a glimpse of Mozart. Their eyes meet—there's a spark, a fire kindled amidst a sea of distractions.

Mozart straightens on the bench, hope flaring in his eyes.

ALOYSIA

(playfully, calling out)

Wolfgang! You’ve come to serenade the Seine?

Mozart stands, overcome with eagerness and anxiety, a mix of joy and dread clouding his intentions.

MOZART

(smiling but feigning nonchalance)

Just testing the waters...

Aloysia approaches, her entourage drifting into the background, intrigued yet oblivious to the charged energy brewing between them.

ALOYSIA

(a teasing lilt)

I do hope the waters can handle your genius.

Mozart chuckles, running a hand through his tousled hair, his heart racing.

MOZART

(earnestly)

Aloysia, I wrote something for you. For us.

He pulls the score from his pocket, the parchment worn yet brimming with promise. The music flows from his pencil like a serene river, infused with both his devotion to Aloysia and his relentless aspirations.

CUT TO:

EXT. SEINE RIVER BANK - CONTINUOUS

Aloysia’s eyes brighten, but a shadow crosses her face as she glances back at her friends whispering and giggling. The pressure of their ambitions clashes with the affection she feels for Wolfgang.

ALOYSIA

(hesitating)

Wolfgang, you know, my career—

MOZART

(cutting her off, there’s urgency)

Your career is magnificent, Aloysia. But we’re artists. Can't our passions coexist?

Aloysia opens her mouth to respond, a wave of emotion freezing the words before they can escape. She grapples with her aspirations, the duality of her love for music and her feelings for Wolfgang.

ALOYSIA

(softly)

It’s not that simple…

Mozart steps closer, lowering his voice, imbued with heartache and hope.

MOZART

(passionately)

I know that we can inspire each other—create something beautiful, something extraordinary!

Silence hangs between them, their unspoken dreams tangled with the reality of their ambitions. The vibrant life of Paris continues around them, but in this moment, they exist in a world of their own.

Suddenly, a commotion breaks the tension—the sound of artists and onlookers gathers as an orchestra begins to play a beautiful concerto nearby. The melody wafts through the air, entrancing everyone, including Aloysia.

ALOYSIA

(looking towards the music, wistfully)

You can feel that power in music—it draws people in, it captivates them…

Mozart’s gaze follows hers, then he turns back, eyes blazing with a fiery determination.

MOZART

(intensely)

And that’s what I want to create! Together.

Aloysia feels the pull of the moment written in his eyes, a clash of her ambitions with her feelings. She steps away, conflict brewing within her.

ALOYSIA

(holding back)

But what if... what if I can’t be what you want?

Her voice wavers, revealing the heartache that shadows her choices. Mozart takes a step closer, desperate yet respectful.

MOZART

(pleading)

I don’t want you to be anything other than yourself. Your music is already magnificent.

Aloysia blinks back tears, torn between the passion and ambition that fuel her desire for success, and the love that blossomed through shared notes and dreams.

The crescendo of the orchestra fills the air, providing a haunting backdrop to their unresolved tension.

FADE OUT.

TEXT ON SCREEN: Can love flourish amidst the trials of ambition?
