# Supplementary material
Source: ML conference proceedings conference paper supplement (https://openreview.net/forum?id=Sxi6gBtJcI)
Supplement: supplementary_material [file screenplay_3.docx]

The Sreenplay Act 3 of 'Fight_Club_Novel_docx':

[Act 3-Scene 1]:

EXT. PARKER-MORRIS BUILDING ROOFTOP - EARLY MORNING

The skyline of the waking city stretches beneath a blanket of light fog. The kaleidoscope of dawn casts a soft golden glow over the rooftops. Cold winds whip across the thirty-story Parker-Morris Building, whipping loose debris around. At the edge of the rooftop, THE PROTAGONIST (30s) stands facing TYLER DURDEN (30s), who radiates reckless energy and chaotic charm. A gun gleams ominously in The Protagonist's hand—both a prop and a decision hanging in the balance.

TYLER

Just do it! This is the moment! What’s waiting for you

down there—an existence without meaning? Hiding

in a cubicle?

The Protagonist's grip on the gun trembles as he looks down at the abyss below. His internal conflict rages—between FEAR and HOPE. Marla's VOICE echoes through his mind, bringing clarity as the chaos surges.

MARLA (V.O.)

You're stronger than this. Face yourself—you can

change. You don’t need him.

The wind howls, drowning out Tyler's provocations for a moment. The Protagonist steadies himself, his breath heavy, eyes locked on Tyler.

PROTAGONIST

(voice breaking)

You think this is freedom? This isn’t who I am.

He steps back, the morning light catching his conflicted expression—a mixture of fear, sadness, and a desperate desire for liberation.

TYLER

You can't hide behind your safe choices forever!

This is your chance to break free from you!

Tyler’s mocking bravado makes The Protagonist flinch. Beneath this reckless facade lies a flicker of doubt.

PROTAGONIST

(introspective)

But at what cost? All this chaos... hurting people...

A pang of GUILT surges through him, recalling faces of those who have suffered because of Tyler's manipulation. The voice of Marla strengthens in his mind—a reminder of human connection he craves.

MARLA (V.O.)

You deserve to be happy, to be real...

With a surge of resolve, The Protagonist lowers the gun slightly.

PROTAGONIST

You’re not me! You’re just a manifestation of

everything I hate... and all the fear I cover with anger.

Tyler scoffs, stepping closer, the gap between them narrowing as tension swells.

TYLER

Fear? You want to die like this? You want to fade into

nothing, or burn bright and chaotic?

The Protagonist’s heart races. He’s perched between action and inaction, the echoes of his life crashing around him.

PROTAGONIST

Or maybe I want to live...

He hesitates, looking toward the horizon, the dawn illuminating the path ahead.

PROTAGONIST (CONT'D)

I want to choose who I become, not let you dictate my fate.

A moment hangs heavy with tension—static. Then, suddenly, Marla’s image flickers in his mind—a voice of reason, a light in the dim chaos.

MARLA (V.O.)

Stand up for yourself!

The Protagonist straightens, locking eyes with Tyler, determination igniting his spirit.

PROTAGONIST

I’m not pulling the trigger! I won’t let you control me

anymore!

Tyler’s face hardens, realizing he’s losing control over The Protagonist. As the morning sun breaks through the fog, illuminating The Protagonist, it feels like a revelation—a moment of awakening.

TYLER

You think you can just walk away?

PROTAGONIST

Watch me.

The Protagonist throws the gun over the edge. It tumbles weightlessly through the air before splashing into the below rooftop pool—a silent testament to the breaking of chains.

The tension shifts, and Tyler’s demeanor morphs from aggressive zeal to confused anger.

TYLER

You’ll regret this—there’s no place for you in

this world without me...

As Tyler steps back, confusion stretching across his face, the weight of The Protagonist's resolve hangs in the air.

PROTAGONIST

No, Tyler. I am my own person now. You wanted chaos,

and I think I’m ready for peace.

In a moment of pause, Tyler's figure begins to flicker, shadows consuming him, a manifestation of the chaos now losing its hold.

TYLER

(yelling)

You’ll never escape me!

The Protagonist turns away from the fading image, now peering deeply into the horizon where the sunlight glimmers against the cityscape as a new beginning.

FADE OUT.

[Act 3-Scene 2]:

EXT. PARKER-MORRIS BUILDING ROOFTOP - EARLY MORNING

The sun rises slowly, spilling amber light over a city still waking. Below, the soft hum of the bustling streets is muffled by the distance. The rooftops glisten with dew, and a gentle breeze stirs loose debris on the edge of the rooftop.

At the edge stands THE PROTAGONIST (30s), disheveled and disconcerted, the gun still clutched in his shaking hands. TYLER DURDEN (30s), confident and reckless, looms beside him, a personification of chaos.

THE PROTAGONIST looks down, his breath heavy with dread. It's a long way down. Each heartbeat resonates through him, a stark reminder of what lies ahead.

TYLER

(smirking)

You can't hold onto the past forever.

This is your moment. Embrace it!

The Protagonist’s grip falters, his vision blurring. Then, through the fog of his mind, MARLA'S VOICE breaks through, piercing the chaos.

MARLA (V.O.)

You are strong enough! Don't let him win!

Flashes of memory ignite—early encounters with Marla, her eyes ignited with passion, laughter echoing in his mind. He can see her smile, feel her warmth, but amid the brightness now lies shadows of betrayal and turmoil caused by Tyler's influence.

THE PROTAGONIST

(to himself)

Marla... I'm sorry...

The wind picks up, swirling around him as if urging him toward an unknown fate.

TYLER

(leaning closer)

What are you afraid of? The mundane life below, or true freedom?

Tension escalates. Tyler circles The Protagonist like a predator, probing.

THE PROTAGONIST

(voice trembling)

This isn’t freedom, Tyler. It’s insanity.

Look at what you've done... what **we’ve** done.

Images explode in his mind—a chaotic montage of their actions together—violence, chaos, destruction, and the faces of those hurt. Then Marla appears again, standing against a backdrop of flames, fiery yet beautiful.

MARLA (V.O.)

You need to break the cycle, reclaim yourself!

The Protagonist closes his eyes, battling the voices of doubt and guilt clawing at his conscience. One echo drowns out the rest, her fierce love cutting through his internal chaos.

THE PROTAGONIST

(defiantly)

You think I need you? You’re just fear simmering

in a mask of rebellion!

Tyler's face twists in momentary surprise at The Protagonist’s boldness.

TYLER

Keep pretending you're stronger than you are!

A gust of wind howls, and The Protagonist's resolve hardens. Underneath the turmoil is a flicker of newfound strength.

THE PROTAGONIST

(steadily)

No! I want to live! Not just exist!

He opens his eyes, suddenly embracing his vulnerability, ripe with clarity—a revolutionary emotional awakening.

THE PROTAGONIST (CONT'D)

I refuse to be a pawn in your game anymore!

I choose my own path!

With dramatic resolve, The Protagonist raises the gun to his head. Tyler's eyes widen in shock. The air crackles, tension thick but electric.

TYLER

(panicking)

You wouldn't dare! You're too afraid!

Refusing to succumb to Tyler's taunts, The Protagonist's heart races. He absorbs the warmth of the morning sun casting light on his surroundings. He sees Marla’s face clear and unhindered in his mind.

MARLA (V.O.)

You can break free!

The Protagonist's finger tightens, desperate and rooted in love and pain, embodying both the anguish of his past and vibrancy of his hope.

THE PROTAGONIST

(whispering)

I am ready to take back who I am...

He pulls the trigger—an eruption of sound and silence. The gunshot reverberates through the air, echoing his final severance from Tyler’s grasp.

CUT TO:

The gun falls from The Protagonist's hand, trailing into the city below, while he drops to his knees, overwhelmed by the contrasting emotions flooding his being—relief mingled with an abyss of sorrow and loss.

FADE OUT.

END SCENE.

[Act 3-Scene 3]:

INT. IMAGINED HEAVENLY SPACE - ETHEAL MORNING

A vast, ethereal expanse filled with shimmering lights and soft, swirling clouds. The atmosphere feels both tranquil and electric, as if revealing deep secrets. THE PROTAGONIST (30s) floats mid-air, disoriented yet contemplative, his face a mask of turmoil.

Before him, GOD appears—an imposing figure with a kind demeanor, dressed in flowing robes, surrounded by a gentle luminescence.

GOD

(voice warm and resonant)

Welcome, my child. Here, we explore.

It is time to reflect.

The Protagonist’s brow furrows, his emotions shift from confusion to dread as he glances down at his own shadow—each speck of darkness recalls the pain of his past decisions.

THE PROTAGONIST

Why am I here? What is this place?

GOD

(with clarity)

You stand at the crossroads of your existence.

Each choice you've made ripples through time,

reaching beyond your own life.

A swirl of memories flickers in and out of visibility around The Protagonist. Images of MARLA’s (30s) laughter, tears, chaos, and moments of love flash vividly, colliding with scenes of violence and destruction.

THE PROTAGONIST

(voice trembling)

I... I never intended to hurt her.

I didn’t understand.

GOD

(nodding gently)

You believed yourself a mere observer,

untouched by the impact of your chaos.

But love, empathy—these reside in connection.

You hurt yourself, yes, but also those

who watched you spiral, like Marla.

A soft, pulsing glow illuminates one memory—Marla’s face, filled with both fierce love and deep sorrow. The Protagonist reaches for her image, his expression breaking as he recalls their last moments.

THE PROTAGONIST

(breaking)

I was so caught up in my own pain.

I thought I was unique—different.

But I caused so much pain!

GOD

(calmly)

Each of us is a unique snowflake,

yet you forget the weight of your choices.

Reflect on this: individuality without

compassion is a hollow mantle.

Do you understand now?

The Protagonist’s gaze drops, his heart aching as the voices of those impacted whirl around him—echoes of hurt and isolation sharpened by flashes of joy he once shared with Marla.

THE PROTAGONIST

I was lost. I thought chaos was freedom,

but it only trapped me in loneliness.

I don’t just want redemption for myself—

I owe it to Marla... to everyone.

A soft wind stirs, carrying celestial whispers, pulling at The Protagonist's heart as he digs deeper into his realizations.

GOD

(gently)

It’s not too late.

A vision of Marla appears beside him, radiant yet solemn. The moments unfold—her smile, the way her eyes sparkled with dreams, her tears during their darkest days.

THE PROTAGONIST

(voice thick with emotion)

I... I never recognized her struggle,

her sacrifices amidst my chaos.

I need to face it, to rebuild what I broke.

I can’t run from my pain, but I can face it.

GOD

(smiling softly)

Understand that true strength lies in vulnerability.

Only when you embrace your pain can you heal.

Redemption is not found in escaping suffering,

but in restoring genuine connections.

The Protagonist’s demeanor shifts from despair to determination. He leans forward, compelled—almost pleading.

THE PROTAGONIST

(earnestly)

Show me the way. I want to change.

I don’t want to lose her... anymore.

The light surrounding God intensifies, and a wave of warmth surrounds The Protagonist, igniting a flicker of hope within him.

GOD

(with conviction)

Then accept who you are—every choice,

every consequence—and let love guide you.

Redemption is a journey, not a destination.

The lights swirl violently, enveloping The Protagonist. He is caught in a whirlwind of memories as he sees himself reaching out to Marla, a mixture of hope and desperation etched in his face.

THE PROTAGONIST

(voice rising through the chaos)

I promise... I will find her!

As the whirlwind dissipates, the heavenly space begins to collapse around him, and with it, the voices fade, replaced by a new understanding—a burning desire for redemption.

FADE OUT.

END SCENE.
