# Supplementary material
Source: ML conference proceedings conference paper supplement (https://openreview.net/forum?id=Sxi6gBtJcI)
Supplement: supplementary_material [file screenplay_3.docx]

The Sreenplay Act 3 of 'Murder_on_the_Orient_Express_Novel_docx':

[Act 3-Scene 1]:

INT. TAURUS EXPRESS - DINING CAR - PRESENT TIME

The opulent dining car of the Taurus Express is bathed in the muted light of early evening, the flickering candles casting dancing shadows upon the mahogany tables. The thick snow falls outside, isolating the passengers from the world. The atmosphere is fraught with tension; the sound of soft whispers and the clinking of silverware is punctuated by the palpable anxiety in the air.

HERCULE POIROT stands at the front of the car, his demeanor calm but serious, his sharp eyes scanning the faces of the twelve passengers seated around the tables. They look back at him, a mixture of curiosity and dread etched on their features.

POIROT

(lifting a hand for silence)

Mesdames et Messieurs, I have called you here for a matter of the utmost importance. We must confront the truth surrounding the recent... événements.

The dining car falls silent, all eyes on Poirot.

POIROT (CONT'D)

The murder of Samuel Ratchett was not merely one man’s folly, but rather... a collective conspiracy—a careful orchestration of retribution.

He pauses dramatically, gauging the reactions. A palpable tension thickens the air.

M. BOUC

(leaning forward, anxious)

What do you mean by 'collective conspiracy', Poirot?

POIROT

(sternly)

I have gathered evidence—pieces of a puzzle that I now lay bare before you. Each of you has a part in this sordid tale—a link to the Armstrong case.

The AMERICAN WIDOW (MRS. HUBBARD) shifts uncomfortably in her seat, her hands trembling slightly.

MRS. HUBBARD

(defensively)

What evidence could you possibly have against us? We are innocent!

POIROT

(turns to Mrs. Hubbard, voice softening)

Ah, Madame, but innocence is rarely absolute in the face of justice.

He unfurls a collection of carefully arranged photographs and documents laid out on the table. The picture of a little girl, DAISY ARMSTRONG, comes into view, and an audible gasp spreads through the car.

POIROT (CONT'D)

Hear the echoes of the past, hidden beneath the weight of your conscience. Each of you bears a shadow—a connection to that tragic night.

A YOUNG ENGLISH WOMAN (MARY DEBENHAM) suddenly stands, her face pale, her voice trembling but urgent.

MARY

(with anguish)

I never meant for it to go this far, Poirot. The pain... it haunts each of us.

POIROT

(voice steady, commanding)

Speak, Mademoiselle, if your heart compels you.

MARY

(catching her breath)

I knew Daisy. I was there when—when they took her. We all felt powerless. It was a moment of weakness, a desire to correct the wrongs...

The tension in the dining car rises; the passengers exchange uneasy glances. They are bound together by guilt, yet assailed by fear.

COLONEL ARBUTHNOT

(defensive, rising)

You’re not accusing us, Poirot! This is madness!

M. BOUC

(nervously but encouraging)

Let us hear what the lady has to say.

MARY

I didn’t grasp the weight of our actions, Colonel. But when I heard Ratchett... Cassetti's laughter—it filled me with rage.

The cabin buzzes with murmurs, the conflict among passengers palpable. A third passenger, GRETA OHLSSON, visibly shaking, hangs her head.

GRETA

(voice cracking)

We were all powerless... Until that night.

POIROT steps closer, observing their evolving emotions with intent. His expression is one of understanding.

POIROT

Guilt... fear... the complexity of your justifications have created this spectacle of silence. Perhaps it is time you share your burdens.

A tense pause envelops the car. The tension is electric as accusations hang in the air.

MRS. HUBBARD

(voice trembling as she speaks quickly)

You can’t put this all on us! Ratchett had enemies! I—

POIROT

(firmly, interrupting)

This is not a defense. This is merely a puzzle waiting to be assembled. Each one of you holds a piece of truth, and together you may find liberation in confession.

The passengers exchange uncertain glances, apprehension etched on their faces. They feel the weight of Poirot's words, trembling between fear and release.

Suddenly, Edgar, the quiet passenger, sits straighter, eyes wide, his voice rising with an urgency that silences the car.

EDGAR

(pleading)

It is true! I struggle with my part. I didn’t want to, but the boy... the fate of Daisy!

POIROT

(turning to him with intensity)

So you admit! You were part of this pact?

EDGAR

(breathless, dark realization dawning)

Yes, I was! I thought... I believed we could save others.

As Edgar's voice falters, a palpable silence follows. The weight of confessions suffocates the room.

POIROT

Then let the floodgates open. Let the confessions spill forth, and bear witness to the truth!

The camera zooms in on the passengers’ faces—shock, guilt, acceptance, and fear converging into a cacophony of emotions, highlighting their struggles.

The tension between the truth and their fears hovers as they linger on the precipice of confession, uncertain of what will emerge from this storm of guilt and regret.

FADE OUT.

[Act 3-Scene 2]:

INT. TAURUS EXPRESS - DINING CAR - PRESENT TIME

The opulent ambiance of the Taurus Express dining car contrasts sharply with the tension among the passengers. Snow swirls outside, creating an isolated cocoon. Flickering candles cast soft light on the polished tables, reflecting the myriad emotions swirling within.

HERCULE POIROT sits at a table, his finger tapping lightly against a carefully arranged stack of evidence. His brows knot as he looks up, absorbing the weight of the moral quandary at hand.

In front of Poirot, MRS. HUBBARD and MARY DEBENHAM exchange anxious glances. The atmosphere is thick with unspoken words, the air charged with a sense of collective guilt.

POIROT

(turning his gaze between the two women)

Madame Hubbard, Mademoiselle Debenham – together, you have borne a heavy truth.

MRS. HUBBARD

(with tremors in her voice)

It was never meant to come to this, Mr. Poirot. We believed...

(pause, eyes glistening)

We believed we were seeking justice for Daisy.

MARY

(interjecting, her voice strained)

Justice, yes! But at what cost? Our actions… they confound even me.

POIROT leans forward, his expression thoughtful, channeling his inner turmoil.

POIROT

Ah, but that is the crux of the matter, no? We speak of justice compelled by deep wounds. But at what threshold do we shift from justice to vengeance?

He gestures to the other passengers, who listen intently, caught in the gravity of their situation. M. BOUC observes with a furrowed brow, deep in contemplation.

M. BOUC

(rising slightly, voice firm)

Poirot, this is more than a philosophical discussion. A man is dead! We must be precise—who among us is to be held accountable?

POIROT

(nods solemnly)

Every soul here carries the weight of that very question. You all conspired in a moment of passion, of loss…

(turning to Mary)

Would you tell me, Mademoiselle Debenham, how it began?

MARY hesitates, tears brim in her eyes, but the resolve to speak allows her to exhale deeply.

MARY

(breathing in, then speaking with urgency)

It started with whispers, a conversation echoing through our hearts. Ratchett's voice taunted us; his past came crashing back with a vengeance.

(looks pointedly at Mrs. Hubbard)

We felt... compelled to act, as if guided by the spirits of those wronged.

POIROT

(voice steady but insistent)

But your actions transformed into shadows… shadows that darkened your souls. It is not merely the end that justifies the means, Madame; it is the heart of the act itself that defines us.

The tension in the dining car morphs into palpable fear. The passengers exchange looks of disbelief and regret, feeling their united front crack beneath Poirot’s piercing observations.

MRS. HUBBARD

(trembling, as if awakening)

But we are not criminals! We were avengers, protecting the memory of our precious children…

POIROT

(interrupting, voice raised)

Yet, revenge does not wash the stains away! It creates new offenses, and we become the very monsters we sought to eradicate.

The emotional outburst reverberates through the car, the gravity of Poirot’s words echoing in the silence.

MARY

(voice breaking)

What can we even say to justify our pact? I know the risks, yet I feel an inexplicable connection with the others. What does that make me?

POIROT watches her intently, the gears of his mind whirring. He stands, pacing the narrow corridor, viscerally contemplating the fractured nature of justice.

POIROT

As I weigh the judgment before me, I am caught between the scales—between what our hearts demand and what our ethics dictate.

(turning to the passengers)

Yet if the law is to serve justice, must it not also protect the innocent from the wrongdoing of angry hearts?

In the hushed tension, GRETA OHLSSON, sitting at the far table, wipes tears from her cheeks and raises her voice.

GRETA

(voice trembling)

We are all innocent in our thoughts, Poirot! But the only innocence left is in our hearts—and that has been tarnished!

POIROT stops, the sadness reflected in his eyes. He nods slowly, acknowledging the complexity of human emotions entwined in their actions.

POIROT

(pensively)

Perhaps the truth lies not in the absolution of innocence but in the acceptance of our collective burdens.

(turns back to the women, his voice soft yet poignant)

Will your confessions set you free from this weight?

Mrs. Hubbard lowers her head, the emotional toll of Poirot’s questions hanging heavily in the air.

MRS. HUBBARD

(faltering)

I never thought—I never wanted to harm anyone, only to... avenge.

POIROT

(leaning in slightly)

What you have done cannot be undone—but your journey to redemption must begin, or risk being entrapped by the very darkness you sought to expel.

The ambiance in the dining car becomes charged with unresolved emotions, as the passengers shift uncomfortably, grappling with their intertwined fates.

POIROT

(closing his eyes for a brief moment)

Understand this: Justice is not a solitary path; it is a tapestry woven from our actions, our regrets, and our hopes.

(raising his head, determination in his voice)

I shall contemplate your fates. But know this—you cannot lay the blame upon circumstances; it is upon us, bound by the choices we make.

The camera captures Poirot’s intense gaze as it shifts across the troubled faces of the gathered passengers. Each one wrestles with their conscience, as Poirot's unresolved thoughts loom over them all.

FADE OUT.
