# Supplementary material
Source: ML conference proceedings conference paper supplement (https://openreview.net/forum?id=Sxi6gBtJcI)
Supplement: supplementary_material [file The Godfather-novel.docx]

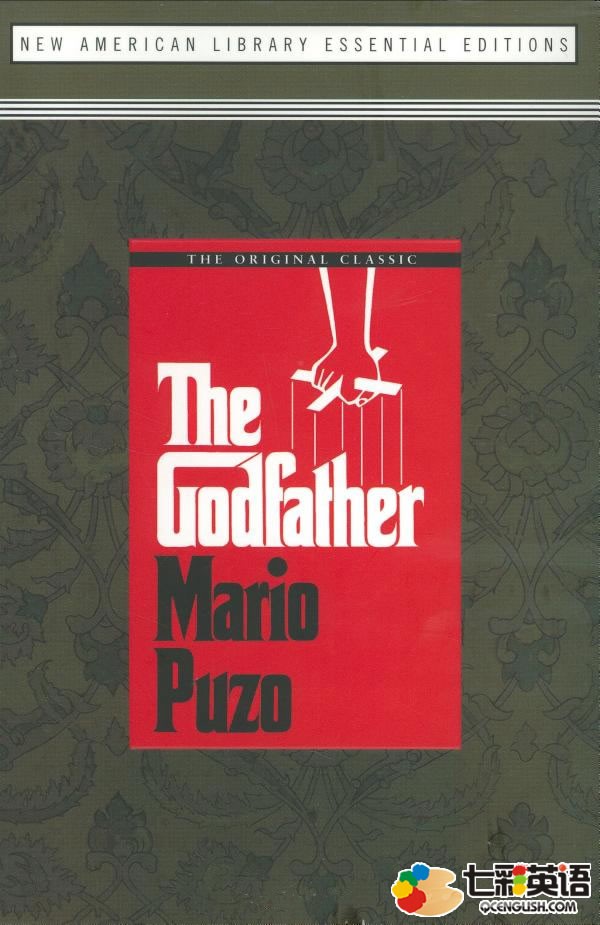


***For Anthony Cleri***

# Book One Chapter 01

***Behind every great fortune there is a crime.***

# BALZAC

Amerigo Bonasera sat in New York Criminal Court Number 3 and waited for justice; vengeance on the men who had so cruelly hurt his daughter, who had tried to dishonor her.

The judge, a formidably heavy-featured man, rolled up the sleeves of his black robe as if to physically chastise the two young men standing before the bench. His face was cold with majestic contempt. But there was something false in all this that Amerigo Bonasera sensed but did not yet understand.

"You acted like the worst kind of degenerates," the judge said harshly. Yes, yes, thought Amerigo Bonasera. Animals. Animals. The two young men, glossy hair crew cut, scrubbed clean-cut faces composed into humble contrition, bowed their heads in submission.

The judge went on. "You acted like wild beasts in a jungle and you are fortunate you did not sexually molest that poor girl or I'd put you behind bars for twenty years." The judge paused, his eyes beneath impressively thick brows flickered slyly toward the sallow-faced Amerigo Bonasera, then lowered to a stack of probation reports before him. He frowned and shrugged as if convinced against his own natural desire. He spoke again.

"But because of your youth, your clean records, because of your fine families, and because the law in its majesty does not seek vengeance, I hereby sentence you to three years' confinement to the penitentiary. Sentence to be suspended."

Only forty years of professional mourning kept the overwhelming frustration and hatred from showing on Amerigo Bonasera's face. His beautiful young daughter was still in the hospital with her broken jaw wired together; and now these two *animales* went free? It had all been a farce. He watched the happy parents cluster around their darling sons. Oh, they were all happy now, they were smiling now.

The black bile, sourly bitter, rose in Bonasera's throat, overflowed through tightly clenched teeth. He used his white linen pocket handkerchief and held it against his lips. He was standing so when the two young men strode freely up the aisle, confident and cool-eyed, smiling, not giving him so much as a glance. He let them pass without saying a word, pressing the fresh linen against his mouth.

The parents of the *animales* were coming by now, two men and two women his age but more American in their dress. They glanced at him, shamefaced, yet in their eyes was an odd, triumphant defiance.

Out of control, Bonasera leaned forward toward the aisle and shouted hoarsely, "You will weep as I have wept--- I will make you weep as your children make me weep"--- the linen at his eyes now. The defense attorneys bringing up the rear swept their clients forward in a tight little band, enveloping the two young men, who had started back down the aisle as if to protect their parents. A huge bailiff moved quickly to block the row in which Bonasera stood. But it was not necessary.

All his years in America, Amerigo Bonasera had trusted in law and order. And he had prospered thereby. Now, though his brain smoked with hatred, though wild visions of buying a gun and killing the two young men jangled the very bones of his skull, Bonasera turned to his still uncomprehending wife and explained to her, "They have made fools of us." He paused and then made his decision, no longer fearing the cost. "For justice we must go on our knees to Don Corleone."

**************

In a garishly decorated Los Angeles hotel suite, Johnny Fontane was as jealously drunk as any ordinary husband. Sprawled on a red couch, he drank straight from the bottle of scotch in his hand, then washed the taste away by dunking his mouth in a crystal bucket of ice cubes and water. It was four in the morning and he was spinning drunken fantasies of murdering his trampy wife when she got home. If she ever did come home. It was too late to call his first wife and ask about the kids and he felt funny about calling any of his friends now that his career was plunging downhill. There had been a time when they would have been delighted, flattered by his calling them at four in the morning but now he bored them. He could even smile a little to himself as he thought that on the way up Johnny Fontane's troubles had fascinated some of the greatest female stars in America.

Gulping at his bottle of scotch, he heard finally his wife's key in the door, but he kept drinking until she walked into the room and stood before him. She was to him so very beautiful, the angelic face, soulful violet eyes, the delicately fragile but perfectly formed body. On the screen her beauty was magnified, spiritualized. A hundred million men all over the world were in love with the face of Margot Ashton. And paid to see it on the screen.

"Where the hell were you?" Johnny Fontane asked. "Out fucking," she said.

She had misjudged his drunkenness. He sprang over the cocktail table and grabbed her by the throat. But close up to that magical face, the lovely violet eyes, he lost his anger and became helpless again. She made the mistake of smiling mockingly, saw his fist draw back. She screamed, "Johnny, not in the face, I'm making a picture."

She was laughing. He punched her in the stomach and she fell to the floor. He fell on top of her. He could smell her fragrant breath as she gasped for air. He punched her on the arms and on the thigh muscles of her silky tanned legs. He beat her as he had beaten snotty smaller kids long ago when he had been a tough teenager in New York's Hell's Kitchen. A painful punishment that would leave no lasting disfigurement of loosened teeth or broken

nose.

But he was not hitting her hard enough. He couldn't. And she was giggling at him. Spread-eagled on the floor, her brocaded gown hitched up above her thighs, she taunted him between giggles. "Come on, stick it in. Stick it in, Johnny, that's what you really want."

Johnny Fontane got up. He hated the woman on the floor but her beauty was a magic shield. Margot rolled away, and in a dancer's spring was on her feet facing him. She went into a childish mocking dance and chanted, "Johnny never hurt me, Johnny never hurt me." Then almost sadly with grave beauty she said, "You poor silly bastard, giving me cramps like a kid. Ah, Johnny, you always will be a dumb romantic guinea, you even make love like a kid. You still think screwing is really like those dopey songs you used to sing." She shook her head and said, "Poor Johnny. Goodbye, Johnny." She walked into the bedroom and he heard her turn the key in the lock.

Johnny sat on the floor with his face in his hands. The sick, humiliating despair overwhelmed him. And then the gutter toughness that had helped him survive the jungle of Hollywood made him pick up the phone and call for a car to take him to the airport. There was one person who could save him. He would go back to New York. He would go back to the one man with the power, the wisdom he needed and a love he still trusted. His Godfather Corleone.

**************

The baker, Nazorine, pudgy and crusty as his great Italian loaves, still dusty with flour, scowled at his wife, his nubile daughter, Katherine, and his baker's helper, Enzo. Enzo had changed into his prisoner-of-war uniform with its green-lettered armband and was terrified that this scene would make him late reporting back to Governor's Island. One of the many thousands of Italian Army prisoners paroled daily to work in the American economy, he lived in constant fear of that parole being revoked. And so the little comedy being played now was, for him, a serious business.

Nazorine asked fiercely, "Have you dishonored my family? Have you given my daughter a little package to remember you by now that the war is over and you know America will kick your ass back to your village full of shit in Sicily?"

Enzo, a very short, strongly built boy, put his hand over his heart and said almost in tears, yet cleverly, "*Padrone,* I swear by the Holy Virgin I have never taken advantage of your kindness. I love your daughter with all respect. I ask for her hand with all respect. I know I have no right, but if they send me back to Italy I can never come back to America. I will never be able to marry Katherine."

Nazorine's wife, Filomena, spoke to the point. "Stop all this foolishness," she said to her pudgy husband. "You know what you must do. Keep Enzo here, send him to hide with our cousins in Long Island."

Katherine was weeping. She was already plump, homely and sprouting a faint moustache.

She would never get a husband as handsome as Enzo, never find another man who touched her body in secret places with such respectful love. "I'll go and live in Italy," she screamed at her father. "I'll run away if you don't keep Enzo here."

Nazorine glanced at her shrewdly. She was a "hot number" this daughter of his. He had seen her brush her swelling buttocks against Enzo's front when the baker's helper squeezed behind her to fill the counter baskets with hot loaves from the oven. The young rascal's hot loaf would be in *her* oven, Nazorine thought lewdly, if proper steps were not taken. Enzo must be kept in America and be made an American citizen. And there was only one man who could arrange such an affair. The Godfather. Don Corleone.

**************

All of these people and many others received engraved invitations to the wedding of Miss Constanzia Corleone, to be celebrated on the last Saturday in August 1945. The father of the bride, Don Vito Corleone, never forgot his old friends and neighbors though he himself now lived in a huge house on Long Island. The reception would be held in that house and the festivities would go on all day. There was no doubt it would be a momentous occasion. The war with the Japanese had just ended so there would not be any nagging fear for their sons fighting in the Army to cloud these festivities. A wedding was just what people needed to show their joy.

And so on that Saturday morning the friends of Don Corleone streamed out of New York City to do him honor. They bore cream-colored envelopes stuffed with cash as bridal gifts, no checks. Inside each envelope a card established the identity of the giver and the measure of his respect for the Godfather. A respect truly earned.

Don Vito Corleone was a man to whom everybody came for help, and never were they disappointed. He made no empty promises, nor the craven excuse that his hands were tied by more powerful forces in the world than himself. It was not necessary that he be your friend, it was not even important that you had no means with which to repay him. Only one thing was required. That you, *you yourself,* proclaim your friendship. And then, no matter how poor or powerless the supplicant, Don Corleone would take that man's troubles to his heart. And he would let nothing stand in the way to a solution of that man's woe. His reward? Friendship, the respectful title of "Don," and sometimes the more affectionate salutation of "Godfather." And perhaps, to show respect only, never for profit, some humble gift--- a gallon of homemade wine or a basket of peppered *taralles*--- specially baked to grace his Christmas table. It was understood, it was mere good manners, to proclaim that you were in his debt and that he had the right to call upon you at any time to redeem your debt by some small service.

Now on this great day, his daughter's wedding day, Don Vito Corleone stood in the doorway of his Long Beach home to greet his guests, all of them known, all of them trusted. Many of them owed their good fortune in life to the Don and on this intimate occasion felt free to call him "Godfather" to his face. Even the people performing festal services were his friends. The bartender was an old comrade whose gift was all the wedding liquors and his own expert skills. The waiters were the friends of Don Corleone's sons. The food on the

garden picnic tables had been cooked by the Don's wife and her friends and the gaily festooned one-acre garden itself had been decorated by the young girl-chums of the bride.

Don Corleone received everyone--- rich and poor, powerful and humble--- with an equal show of love. He slighted no one. That was his character. And the guests so exclaimed at how well he looked in his tux that an inexperienced observer might easily have thought the Don himself was the lucky groom.

Standing at the door with him were two of his three sons. The eldest, baptized Santino but called Sonny by everyone except his father, was looked at askance by the older Italian men; with admiration by the younger. Sonny Corleone was tall for a first-generation American of Italian parentage, almost six feet, and his crop of bushy, curly hair made him look even taller. His face was that of a gross Cupid, the features even but the bow-shaped lips thickly sensual, the dimpled cleft chin in some curious way obscene. He was built as powerfully as a bull and it was common knowledge that he was so generously endowed by nature that his martyred wife feared the marriage bed as unbelievers once feared the rack. It was whispered that when as a youth he had visited houses of ill fame, even the most hardened and fearless *putain*, after an awed inspection of his massive organ, demanded double price.

Here at the wedding feast, some young matrons, wide-hipped, wide-mouthed, measured Sonny Corleone with coolly confident eyes. But on this particular day they were wasting their time. Sonny Corleone, despite the presence of his wife and three small children, had plans for his sister's maid of honor, Lucy Mancini. This young girl, fully aware, sat at a garden table in her pink formal gown, a tiara of flowers in her glossy black hair. She had flirted with Sonny in the past week of rehearsals and squeezed his hand that morning at the altar. A maiden could do no more.

She did not care that he would never be the great man his father had proved to be. Sonny Corleone had strength, he had courage. He was generous and his heart was admitted to be as big as his organ. Yet he did not have his father's humility but instead a quick, hot temper that led him into errors of judgment. Though he was a great help in his father's business, there were many who doubted that he would become the heir to it.

The second son, Frederico, called Fred or Fredo,was a child every Italian prayed to the saints for. Dutiful, loyal, always at the service of his father, living with his parents at age thirty. He was short and burly, not handsome but with the same Cupid head of the family, the curly helmet of hair over the round face and sensual bow-shaped lips. Only, in Fred, these lips were not sensual but granitelike. Inclined to dourness, he was still a crutch to his father, never disputed him, never embarrassed him by scandalous behavior with women. Despite all these virtues he did not have that personal magnetism, that animal force, so necessary for a leader of men, and he too was not expected to inherit the family business.

The third son, Michael Corleone, did not stand with his father and his two brothers but sat at a table in the most secluded corner of the garden. But even there he could not escape the attentions of the family friends.

Michael Corleone was the youngest son of the Don and the only child who had refused the

great man's direction. He did not have the heavy, Cupid-shaped face of the other children, and his jet black hair was straight rather than curly. His skin was a clear olive-brown that would have been called beautiful in a girl. He was handsome in a delicate way. Indeed there had been a time whey the Don had worried about his youngest son's masculinity. A worry that was put to rest when Michael Corleone became seventeen years old.

Now this youngest son sat at a table in the extreme corner of the garden to proclaim his chosen alienation from father and family. Beside him sat the American girl everyone had heard about but whom no one had seen until this day. He had, of course, shown the proper respect and introduced her to everyone at the wedding, including his family. They were not impressed with her. She was too thin, she was too fair, her face was too sharply intelligent for a woman, her manner too free for a maiden. Her name, too, was outlandish to their ears; she called herself Kay Adams. If she had told them that her family had settled in America two hundred years ago and her name was a common one, they would have shrugged.

Every guest noticed that the Don paid no particular attention to this third son. Michael had been his favorite before the war and obviously the chosen heir to run the family business when the proper moment came. He had all the quiet force and intelligence of his great father, the born instinct to act in such a way that men had no recourse but to respect him. But when World War II broke out, Michael Corleone volunteered for the Marine Corps. He defied his father's express command when he did so.

Don Corleone had no desire, no intention, of letting his youngest son be killed in the service of a power foreign to himself. Doctors had been bribed, secret arrangements had been made. A great deal of money had been spent to take the proper precautions. But Michael was twenty-one years of age and nothing could be done against his own willfulness. He enlisted and fought over the Pacific Ocean. He became a Captain and won medals. In 1944 his picture was printed in *Life* magazine with a photo layout of his deeds. A friend had shown Don Corleone the magazine (his family did not dare), and the Don had grunted disdainfully and said, "He performs those miracles for strangers."

When Michael Corleone was discharged early in 1945 to recover from a disabling wound, he had no idea that his father had arranged his release. He stayed home for a few weeks, then, without consulting anyone, entered Dartmouth College in Hanover, New Hampshire, and so he left his father's house. To return for the wedding of his sister and to show his own future wife to them, the washed-out rag of an American girl.

Michael Corleone was amusing Kay Adams by telling her little stories about some of the more colorful wedding guests. He was, in turn, amused by her finding these people exotic, and, as always, charmed by her intense interest in anything new and foreign to her experience. Finally her attention was caught by a small group of men gathered around a wooden barrel of homemade wine. The men were Amerigo Bonasera, Nazorine the Baker, Anthony Coppola and Luca Brasi. With her usual alert intelligence she remarked on the fact that these four men did not seem particularly happy. Michael smiled. "No, they're not," he said. "They're waiting to see my father in private. They have favors to ask." And indeed it was easy to see that all four men constantly followed the Don with their eyes.

As Don Corleone stood greeting guests, a black Chevrolet sedan came to a stop on the far side of the paved mall. Two men in the front seat pulled notebooks from their jackets and, with no attempt at concealment, jotted down license numbers of the other cars parked around the mall. Sonny turned to his father and said, "Those guys over there must be cops."

Don Corleone shrugged. "I don't own the street. They can do what they please."

Sonny's heavy Cupid face grew red with anger. "Those lousy bastards, they don't respect anything." He left the steps of the house and walked across the mall to where the black sedan was parked. He thrust his face angrily close to the face of the driver, who did not flinch but flapped open his wallet to show a green identification card. Sonny stepped back without saying a word. He spat so that the spittle hit the back door of the sedan and walked away. He was hoping the driver would get out of the sedan and come after him, on the mall, but nothing happened. When he reached the steps he said to his father, "Those guys are FBI men. They're taking down all the license numbers. Snotty bastards."

Don Corleone knew who they were. His closest and most intimate friends had been advised to attend the wedding in automobiles not their own. And though he disapproved of his son's foolish display of anger, the tantrum served a purpose. It would convince the interlopers that their presence was unexpected and unprepared for. So Don Corleone himself was not angry. He had long ago learned that society imposes insults that must be borne, comforted by the knowledge that in this world there comes a time when the most humble of men, if he keeps his eyes open, can take his revenge on the most powerful. It was this knowledge that prevented the Don from losing the humility all his friends admired in him.

But now in the garden, behind the house, a four-piece band began to play. All the guests had arrived. Don Corleone put the intruders out of his mind and led his two sons to the wedding feast.

**************

There were, now, hundreds of guests in the huge garden, some dancing on the wooden platform bedecked with flowers, others sitting at long tables piled high with spicy food and gallon jugs of black, homemade wine. The bride, Connie Corleone, sat in splendor at a special raised table with her groom, the maid of honor, bridesmaids and ushers. It was a rustic setting in the old Italian style. Not to the bride's taste, but Connie had consented to a "guinea" wedding to please her father because she had so displeased him in her choice of a husband.

The groom, Carlo Rizzi, was a half-breed, born of a Sicilian father and the North Italian mother from whom he had inherited his blond hair and blue eyes. His parents lived in Nevada and Carlo had left that state because of a little trouble with the law. In New York he met Sonny Corleone and so met the sister. Don Corleone, of course, sent trusted friends to Nevada and they reported that Carlo's police trouble was a youthful indiscretion with a gun, not serious, that could easily be wiped off the books to leave the youth with a clean record. They also came back with detailed information on legal gambling in Nevada which greatly interested the Don and which he had been pondering over since. It was part of the Don's

greatness that he profited from everything.

Connie Corleone was a not quite pretty girl, thin and nervous and certain to become shrewish later in life. But today, transformed by her white bridal gown and eager virginity, she was so radiant as to be almost beautiful. Beneath the wooden table her hand rested on the muscular thigh of her groom. Her Cupid-bow mouth pouted to give him an airy kiss.

She thought him incredibly handsome. Carlo Rizzi had worked in the open desert air while very young--- heavy laborer's work. Now he had tremendous forearms and his shoulders bulged the jacket of his tux. He basked in the adoring eyes of his bride and filled her glass with wine. He was elaborately courteous to her as if they were both actors in a play. But his eyes kept flickering toward the huge silk purse the bride wore on her right shoulder and which was now stuffed full of money envelopes. How much did it hold? Ten thousand? Twenty thousand? Carlo Rizzi smiled. It was only the beginning. He had, after all, married into a royal family. They would have to take care of him.

In the crowd of guests a dapper young man with the sleek head of a ferret was also studying the silk purse. From sheer habit Paulie Gatto wondered just how he could go about hijacking that fat pocketbook. The idea amused him. But he knew it was idle, innocent dreaming as small children dream of knocking out tanks with popguns. He watched his boss, fat, middle-aged Peter Clemenza whirling young girls around the wooden dance floor in a rustic and lusty *Tarantella*. Clemenza, immensely tall, immensely huge, danced with such skill and abandon, his hard belly lecherously bumping the breasts of younger, tinier women, that all the guests were applauding him. Older women grabbed his arm to become his next partner. The younger men respectfully cleared off the floor and clapped their hands in time to the mandolin's wild strumming. When Clemenza finally collapsed in a chair, Paulie Gatto brought him a glass of icy black wine and wiped the perspiring Jovelike brow with his silk handkerchief. Clemenza was blowing like a whale as he gulped down the wine. But instead of thanking Paulie he said curtly, "Never mind being a dance judge, do your job. Take a walk around the neighborhood and see everything is OK." Paulie slid away into the crowd.

The band took a refreshment break. A young man named Nino Valenti picked up a discarded mandolin, put his left foot up on a chair and began to sing a coarse Sicilian love song. Nino Valenti's face was handsome though bloated by continual drinking and he was already a little drunk. He rolled his eyes as his tongue caressed the obscene lyrics. The women shrieked with glee and the men shouted the last word of each stanza with the singer.

Don Corleone, notoriously straitlaced in such matters, though his stout wife was screaming joyfully with the others, disappeared tactfully into the house. Seeing this, Sonny Corleone made his way to the bride's table and sat down beside young Lucy Mancini, the maid of honor. They were safe. His wife was in the kitchen putting the last touches on the serving of the wedding cake. Sonny whispered a few words in the young girl's ear and she rose. Sonny waited a few minutes and then casually followed her, stopping to talk with a guest here and there as he worked his way through the crowd.

All eyes followed them. The maid of honor, thoroughly Americanized by three years of college, was a ripe girl who already had a "reputation." All through the marriage rehearsals

she had flirted with Sonny Corleone in a teasing, joking way she thought was permitted because he was the best man and her wedding partner. Now holding her pink gown up off the ground, Lucy Mancini went into the house, smiling with false innocence; ran lightly up the stairs to the bathroom. She stayed there for a few moments. When she came out Sonny Corleone was on the landing above, beckoning her upward.

From behind the closed window of Don Corleone's "office," a slightly raised corner room, Thomas Hagen watched the wedding party in the festooned garden. The walls behind him were stacked with law books. Hagen was the Don's lawyer and acting *Consigliere*, or counselor, and as such held the most vital subordinate position in the family business. He and the Don had solved many a knotty problem in this room, and so when he saw the Godfather leave the festivities and enter the house, he knew, wedding or no, there would be a little work this day. The Don would be coming to see him. Then Hagen saw Sonny Corleone whisper in Lucy Mancini's ear and their little comedy as he followed her into the house. Hagen grimaced, debated whether to inform the Don, and decided against it. He went to the desk and picked up a handwritten list of the people who had been granted permission to see Don Corleone privately. When the Don entered the room, Hagen handed him the list. Don Corleone nodded and said, "Leave Bonasera to the end."

Hagen used the French doors and went directly out into the garden to where the supplicants clustered around the barrel of wine. He pointed to the baker, the pudgy Nazorine.

Don Corleone greeted the baker with an embrace. They had played together as children in Italy and had grown up in friendship. Every Easter freshly baked clotted-cheese and wheat-germ pies, their crusts yolk-gold, big around as truck wheels, arrived at Don Corleone's home. On Christmas, on family birthdays, rich creamy pastries proclaimed the Nazorines' respect. And all through the years, lean and fat, Nazorine cheerfully paid his dues to the bakery union organized by the Don in his salad days. Never asking for a favor in return except for the chance to buy black-market OPA sugar coupons during the war. Now the time had come for the baker to claim his rights as a loyal friend, and Don Corleone looked forward with great pleasure to granting his request.

He gave the baker a Di Nobili cigar and a glass of yellow Strega and put his hand on the man's shoulder to urge him on. That was the mark of the Don's humanity. He knew from bitter experience what courage it took to ask a favor from a fellow man.

The baker told the story of his daughter and Enzo. A fine Italian lad from Sicily; captured by the American Army; sent to the United States as a prisoner of war; given parole to help our war effort! A pure and honorable love had sprung up between honest Enzo and his sheltered Katherine but now that the war was ended the poor lad would be repatriated to Italy and Nazorine's daughter would surely die of a broken heart. Only Godfather Corleone could help this afflicted couple. He was their last hope.

The Don walked Nazorine up and down the room, his hand on the baker's shoulder, his head nodding with understanding to keep up the man's courage. When the baker had finished, Don Corleone smiled at him and said, "My dear friend, put all your worries aside."

He went on to explain very carefully what must be done. The Congressman of the district must be petitioned. The Congressman would propose a special bill that would allow Enzo to become a citizen. The bill would surely pass Congress. A privilege all those rascals extended to each other. Don Corleone explained that this would cost money, the going price was now two thousand dollars. He, Don Corleone, would guarantee performance and accept payment. Did his friend agree?

The baker nodded his head vigorously. He did not expect such a great favor for nothing. That was understood. A special Act of Congress does not come cheap. Nazorine was almost tearful in his thanks. Don Corleone walked him to the door, assuring him that competent people would be sent to the bakery to arrange all details, complete all necessary documents. The baker embraced him before disappearing into the garden.

Hagen smiled at the Don. "That's a good investment for Nazorine. A son-in-law and a cheap lifetime helper in his bakery all for two thousand dollars." He paused. "Who do I give this job to?"

Don Corleone frowned in thought. "Not to our *paisan*. Give it to the Jew in the next district. Have the home addresses changed. I think there might be many such cases now the war is over; we should have extra people in Washington that can handle the overflow and not raise the price." Hagen made a note on his pad. "Not Congressman Luteco. Try Fischer."

The next man Hagen brought in was a very simple case. His name was Anthony Coppola and he was the son of a man Don Corleone had worked with in the railroad yards in his youth. Coppola needed five hundred dollars to open a pizzeria; for a deposit on fixtures and the special oven. For reasons not gone into, credit was not available. The Don reached into his pocket and took out a roll of bills. It was not quite enough. He grimaced and said to Tom Hagen, "Loan me a hundred dollars, I'll pay you back Monday when I go to the bank." The supplicant protested that four hundred dollars would be ample, but Don Corleone patted his shoulder, saying, apologetically, "This fancy wedding left me a little short of cash." He took the money Hagen extended to him and gave it to Anthony Coppola with his own roll of bills.

Hagen watched with quiet admiration. The Don always taught that when a man was generous, he must show the generosity as personal. How flattering to Anthony Coppola that a man like the Don would borrow to loan *him* money. Not that Coppola did not know that the Don was a millionaire but how many millionaires let themselves be put to even a small inconvenience by a poor friend?

The Don raised his head inquiringly. Hagen said, "He's not on the list but Luca Brasi wants to see you. He understands it can't be public but he wants to congratulate you in person."

For the first time the Don seemed displeased. The answer was devious. "Is it necessary?" he asked.

Hagen shrugged. "You understand him better than I do. But he was very grateful that you invited him to the wedding. He never expected that. I think he wants to show his gratitude."

Don Corleone nodded and gestured that Luca Brasi should be brought to him.

In the garden Kay Adams was struck by the violet fury imprinted on the face of Luca Brasi. She asked about him. Michael had brought Kay to the wedding so that she would slowly and perhaps without too much of a shock, absorb the truth about his father. But so far she seemed to regard the Don as a slightly unethical businessman. Michael decided to tell her part of the truth indirectly. He explained that Luca Brasi was one of the most feared men in the Eastern underworld. His great talent, it was said, was that he could do a job of murder all by himself, without confederates, which automatically made discovery and conviction by the law almost impossible. Michael grimaced and said, "I don't know whether all that stuff is true. I do know he is sort of a friend to my father."

For the first time Kay began to understand. She asked a little incredulously, "You're not hinting that a man like that works for your father?"

The hell with it, he thought. He said, straight out, "Nearly fifteen years ago some people wanted to take over my father's oil importing business. They tried to kill him and nearly did. Luca Brasi went after them. The story is that he killed six men in two weeks and that ended the famous olive oil war." He smiled as if it were a joke.

Kay shuddered. "You mean your father was shot by gangsters?"

"Fifteen years ago," Michael said. "Everything's been peaceful since then." He was afraid he had gone too far.

"You're trying to scare me," Kay said. "You just don't want me to marry you." She smiled at him and poked his ribs with her elbow. "Very clever."

Michael smiled back at her. "I want you to think about it," he said. "Did he really kill six men?" Kay asked.

"That's what the newspapers claimed," Mike said. "Nobody ever proved it. But there's another story about him that nobody ever tells. It's supposed to be so terrible that even my father won't talk about it. Tom Hagen knows the story and he won't tell me. Once I kidded him, I said, 'When will I be old enough to hear that story about Luca?' and Tom said, 'When you're a hundred.' " Michael sipped his glass of wine. "That must be some story. That must be some Luca."

Luca Brasi was indeed a man to frighten the devil in hell himself. Short, squat, massive-skulled, his presence sent out alarm bells of danger. His face was stamped into a mask of fury. The eyes were brown but with none of the warmth of that color, more a deadly tan. The mouth was not so much cruel as lifeless; thin, rubbery and the color of veal.

Brasi's reputation for violence was awesome and his devotion to Don Corleone legendary. He was, in himself, one of the great blocks that supported the Don's power structure. His kind was a rarity.

Luca Brasi did not fear the police, he did not fear society, he did not fear God, he did not fear hell, he did not fear or love his fellow man. But he had elected, he had *chosen*, to fear and love Don Corleone. Ushered into the presence of the Don, the terrible Brasi held himself stiff with respect. He stuttered over the flowery congatulations he offered and his formal hope that the first grandchild would be masculine. He then handed the Don an envelope stuffed with cash as a gift for the bridal couple.

So that was what he wanted to do. Hagen noticed the change in Don Corleone. The Don received Brasi as a king greets a subject who has done him an enormous service, never familiar but with regal respect. With every gesture, with every word, Don Corleone made it clear to Luca Brasi that he was *valued*. Not for one moment did he show surprise at the wedding gift being presented to him personally. He understood.

The money in the envelope was sure to be more than anyone else had given. Brasi had spent many hours deciding on the sum, comparing it to what the other guests might offer. He wanted to be the most generous to show that he had the most respect, and that was why he had given his envelope to the Don personally, a gaucherie the Don overlooked in his own flowery sentence of thanks. Hagen saw Luca Brasi's face lose its mask of fury, swell with pride and pleasure. Brasi kissed the Don's hand before he went out the door that Hagen held open. Hagen prudently gave Brasi a friendly smile which the squat man acknowledged with a polite stretching of rubbery, veal-colored lips.

When the door closed Don Corleone gave a small sigh of relief. Brasi was the only man in the world who could make him nervous. The man was like a natural force, not truly subject to control. He had to be handled as gingerly as dynamite. The Don shrugged. Even dynamite could be exploded harmlessly if the need arose. He looked questioningly at Hagen. "Is Bonasera the only one left?"

Hagen nodded. Don Corleone frowned in thought, then said, "Before you bring him in, tell Santino to come here. He should learn some things."

Out in the garden, Hagen searched anxiously for Sonny Corleone. He told the waiting Bonasera to be patient and went over to Michael Corleone and his girl friend. "Did you see Sonny around?" he asked. Michael shook his head. Damn, Hagen thought, if Sonny was screwing the maid of honor all this time there was going to be a mess of trouble. His wife, the young girl's family; it could be a disaster. Anxiously he hurried to the entrance through which he had seen Sonny disappear almost a half hour ago.

Seeing Hagen go into the house, Kay Adams asked Michael Corleone, "Who is he? You introduced him as your brother but his name is different and he certainly doesn't look Italian."

"Tom lived with us since he was twelve years old," Michael said. "His parents died and he was roaming around the streets with this bad eye infection. Sonny brought him home one night and he just stayed. He didn't have anyplace to go. He lived with us until he got married."

Kay Adams was thrilled. "That's really romantic," she said. "Your father must be a warmhearted person. To adopt somebody just like that when he had so many children of his own."

Michael didn't bother to point out that immigrant Italians considered four children a small family. He merely said, "Tom wasn't adopted. He just lived with us."

"Oh," Kay said, then asked curiously, "why didn't you adopt him?"

Michael laughed. "Because my father said it would be disrespectful for Tom to change his name. Disrespectful to his own parents."

They saw Hagen shoo Sonny through the French door into the Don's office and then crook a finger at Amerigo Bonasera. "Why do they bother your father with business on a day like this?" Kay asked.

Michael laughed again. "Because they know that by tradition no Sicilian can refuse a request on his daughter's wedding day. And no Sicilian ever lets a chance like that go by."

**************

Lucy Mancini lifted her pink gown off the floor and ran up the steps. Sonny Corleone's heavy Cupid face, redly obscene with winey lust, frightened her, but she had teased him for the past week to just this end. In her two college love affairs she had felt nothing and neither of them lasted more than a week. Quarreling, her second lover had mumbled something about her being "too big down there." Lucy had understood and for the rest of the school term had refused to go out on any dates.

During the summer, preparing for the wedding of her best friend, Connie Corleone, Lucy heard the whispered stories about Sonny. One Sunday afternoon in the Corleone kitchen, Sonny's wife Sandra gossiped freely. Sandra was a coarse, good-natured woman who had been born in Italy but brought to America as a small child. She was strongly built with great breasts and had already borne three children in five years of marriage. Sandra and the other women teased Connie about the terrors of the nuptial bed. "My God," Sandra had giggled, "when I saw that pole of Sonny's for the first time and realized he was going to stick it into me, I yelled bloody murder. After the first year my insides felt as mushy as macaroni boiled for an hour. When I heard he was doing the job on other girls I went to church and lit a candle."

They had all laughed but Lucy had felt her flesh twitching between her legs.

Now as she ran up the steps toward Sonny a tremendous flash of desire went through her body. On the landing Sonny grabbed her hand and pulled her down the hall into an empty bedroom. Her legs went weak as the door closed behind them. She felt Sonny's mouth on hers, his lips tasting of burnt tobacco, bitter. She opened her mouth. At that moment she felt his hand come up beneath her bridesmaid's gown, heard the rustle of material giving way,

felt his large warm hand between her legs, ripping aside the satin panties to caress her vulva. She put her arms around his neck and hung there as he opened his trousers. Then he placed both hands beneath her bare buttocks and lifted her. She gave a little hop in the air so that both her legs were wrapped around his upper thighs. His tongue was in her mouth and she sucked on it. He gave a savage thrust that banged her head against the door. She felt something burning pass between her thighs. She let her right hand drop from his neck and reached down to guide him. Her hand closed around an enormous, blood-gorged pole of muscle. It pulsated in her hand like an animal and almost weeping with grateful ecstasy she pointed it into her own wet, turgid flesh. The thrust of its entering, the unbelievable pleasure made her gasp, brought her legs up almost around his neck, and then like a quiver, her body received the savage arrows of his lightning-like thrusts; innumerable, torturing; arching her pelvis higher and higher until for the first time in her life she reached a shattering climax, felt his hardness break and then the crawly flood of semen over her thighs. Slowly her legs relaxed from around his body, slid down until they reached the floor. They leaned against each other, out of breath.

It might have been going on for some time but now they could hear the soft knocking on the door. Sonny quickly buttoned his trousers, meanwhile blocking the door so that it could not be opened. Lucy frantically smoothed down her pink gown, her eyes flickering, but the thing that had given her so much pleasure was hidden inside sober black cloth. Then they heard Tom Hagen's voice, very low, "Sonny, you in there?"

Sonny sighed with relief. He winked at Lucy. "Yeah, Tom, what is it?"

Hagen's voice, still low, said, "The Don wants you in his office. Now." They could hear his footsteps as he walked away. Sonny waited for a few moments, gave Lucy a hard kiss on the lips, and then slipped out the door after Hagen.

Lucy combed her hair. She checked her dress and pulled around her garter straps. Her body felt bruised, her lips pulpy and tender. She went out the door and though she felt the sticky wetness between her thighs she did not go to the bathroom to wash but ran straight on down the steps and into the garden. She took her seat at the bridal table next to Connie, who exclaimed petulantly, "Lucy, where were you? You look drunk. Stay beside me now."

The blond groom poured Lucy a glass of wine and smiled knowingly. Lucy didn't care. She lifted the grapey, dark red juice to her parched mouth and drank. She felt the sticky wetness between her thighs and pressed her legs together. Her body was trembling. Over the glass rim, as she drank, her eyes searched hungrily to find Sonny Corleone. There was no one else she cared to see. Slyly she whispered in Connie's ear, "Only a few hours more and you'll know what it's all about." Connie giggled. Lucy demurely folded her hands on the table, treacherously triumphant, as if she had stolen a treasure from the bride.

**************

Amerigo Bonasera followed Hagen into the corner room of the house and found Don Corleone sitting behind a huge desk. Sonny Corleone was standing by the window, looking out into the garden. For the first time that afternoon the Don behaved coolly. He did not

embrace the visitor or shake hands. The sallow-faced undertaker owed his invitation to the fact that his wife and the wife of the Don were the closest of friends. Amerigo Bonasera himself was in severe disfavor with Don Corleone.

Bonasera began his request obliquely and cleverly. "You must excuse my daughter, your wife's goddaughter, for not doing your family the respect of coming today. She is in the hospital still." He glanced at Sonny Corleone and Tom Hagen to indicate that he did not wish to speak before them. But the Don was merciless.

"We all know of your daughter's misfortune," Don Corleone said. "If I can help her in any way, you have only to speak. My wife is her godmother after all. I have never forgotten that honor." This was a rebuke. The undertaker never called Don Corleone, "Godfather" as custom dictated.

Bonasera, ashen-faced, asked, directly now, "May I speak to you alone?"

Don Corleone shook his head. "I trust these two men with my life. They are my two right arms. I cannot insult them by sending them away."

The undertaker closed his eyes for a moment and then began to speak. His voice was quiet, the voice he used to console the bereaved. "I raised my daughter in the American fashion. I believe in America. America has made my fortune. I gave my daughter her freedom and yet taught her never to dishonor her family. She found a 'boy friend,' not an Italian. She went to the movies with him. She stayed out late. But he never came to meet her parents. I accepted all this without a protest, the fault is mine. Two months ago he took her for a drive. He had a masculine friend with him. They made her drink whiskey and then they tried to take advantage of her. She resisted. She kept her honor. They beat her. Like an animal. When I went to the hospital she had two black eyes. Her nose was broken. Her jaw was shattered. They had to wire it together. She wept through her pain. 'Father, Father, why did they do it? Why did they do this to me?' And I wept." Bonasera could not speak further, he was weeping now though his voice had not betrayed his emotion.

Don Corleone, as if against his will, made a gesture of sympathy and Bonasera went on, his voice human with suffering. "Why did I weep? She was the light of my life, an affectionate daughter. A beautiful girl. She trusted people and now she will never trust them again. She will never be beautiful again." He was trembling, his sallow face flushed an ugly dark red.

"I went to the police like a good American. The two boys were arrested. They were brought to trial. The evidence was overwhelming and they pleaded guilty. The judge sentenced them to three years in prison and suspended the sentence. They went free that very day. I stood in the courtroom like a fool and those bastards smiled at me. And then I said to my wife: 'We must go to Don Corleone for justice.' "

The Don had bowed his head to show respect for the man's grief. But when he spoke, the words were cold with offended dignity. "Why did you go to the police? Why didn't you come to me at the beginning of this affair?"

Bonasera muttered almost inaudibly, "What do you want of me? Tell me what you wish. But do what I beg you to do." There was something almost insolent in his words.

Don Corleone said gravely, "And what is that?"

Bonasera glanced at Hagen and Sonny Corleone and shook his head. The Don, still sitting at Hagen's desk, inclined his body toward the undertaker. Bonasera hesitated, then bent down and put his lips so close to the Don's hairy ear that they touched. Don Corleone listened like a priest in the confessional, gazing away into the distance, impassive, remote. They stood so for a long moment until Bonasera finished whispering and straightened to his full height. The Don looked up gravely at Bonasera. Bonasera, his face flushed, returned the stare unflinchingly.

Finally the Don spoke. "That I cannot do. You are being carried away."

Bonasera said loudly, clearly, "I will pay you anything you ask." On hearing this, Hagen flinched, a nervous flick of his head. Sonny Corleone folded his arms, smiled sardonically as he turned from the window to watch the scene in the room for the first time.

Don Corleone rose from behind the desk. His face was still impassive but his voice rang like cold death. "We have known each other many years, you and I," he said to the undertaker, "but until this day you never came to me for counsel or help. I can't remember the last time you invited me to your house for coffee though my wife is godmother to your only child. Let us be frank. You spurned my friendship. You feared to be in my debt."

Bonasera murmured, "I didn't want to get into trouble."

The Don held up his hand. "No. Don't speak. You found America a paradise. You had a good trade, you made a good living, you thought the world a harmless place where you could take your pleasure as you willed. You never armed yourself with true friends. After all, the police guarded you, there were courts of law, you and yours could come to no harm. You did not need Don Corleone. Very well. My feelings were wounded but I am not that sort of person why thrusts his friendship on those who do not value it--- on those who think me of little account." The Don paused and gave the undertaker a polite, ironic smile. "Now you come to me and say, 'Don Corleone give me justice.' And you do not ask with respect. You do not offer me your friendship. You come into my home on the bridal day of my daughter and you ask me to do murder and you say"-- here the Don's voice became a scornful mimicry--- " 'I will pay you anything.' No, no, I am not offended, but what have I ever done to make you treat me so disrespectfully?"

Bonasera cried out in his anguish and his fear, "America has been good to me. I wanted to be a good citizen. I wanted my child to be American."

The Don clapped his hands together with decisive approval. "Well spoken. Very fine. Then you have nothing to complain about. The judge has ruled. America has ruled. Bring your daughter flowers and a box of candy when you go visit her in the hospital. That will

comfort her. Be content. After all, this is not a serious affair, the boys were young, high-spirited, and one of them is the son of a powerful politician. No, my dear Amerigo, you have always been honest. I must admit, though you spurned my friendship, that I would trust the given word of Amerigo Bonasera more than I would any other man's. So give me your word that you will put aside this madness. It is not American. Forgive. Forget. Life is full of misfortunes."

The cruel and contemptuous irony with which all this was said, the controlled anger of the Don, reduced the poor undertaker to a quivering jelly but he spoke up bravely again. "I ask you for justice."

Don Corleone said curtly, "The court gave you justice."

Bonasera shook his head stubbornly. "No. They gave the youths justice. They did not give me justice."

The Don acknowledged this fine distinction with an approving nod, then asked, "What is your justice?"

"An eye for an eye," Bonasera said.

"You asked for more," the Don said. "Your daughter is alive."

Bonasera said reluctantly, "Let them suffer as she suffers." The Don waited for him to speak further. Bonasera screwed up the last of his courage and said, "How much shall I pay you?" It was a despairing wail.

Don Corleone turned his back. It was a dismissal. Bonasera did not budge.

Finally, sighing, a good-hearted man who cannot remain angry with an erring friend, Don Corleone turned back to the undertaker, who was now as pale as one of his corpses. Don Corleone was gentle, patient. "Why do you fear to give your first allegiance to me?" he said. "You go to the law courts and wait for months. You spend money on lawyers who know full well you are to be made a fool of. You accept judgment from a judge who sells himself like the worst whore in the streets. Years gone by, when you needed money, you went to the banks and paid ruinous interest, waited hat in hand like a beggar while they sniffed around, poked their noses up your very asshole to make sure you could pay them back." The Don paused, his voice became sterner.

"But if you had come to me, my purse would have been yours. If you had come to me for justice those scum who ruined your daughter would be weeping bitter tears this day. If by some misfortune an honest man like yourself made enemies they would become my enemies"--- the Don raised his arm, finger pointing at Bonasera--- "and then, believe me, they would fear you."

Bonasera bowed his head and murmured in a strangled voice, "Be my friend. I accept."

Don Corleone put his hand on the man's shoulder. "Good," he said, "you shall have your justice. Some day, and that day may never come, I will call upon you to do me a service in return. Until that day, consider this justice a gift from my wife, your daughter's godmother."

When the door closed behind the grateful undertaker, Don Corleone turned to Hagen and said, "Give this affair to Clemenza and tell him to be sure to use reliable people, people who will not be carried away by the smell of blood. After all, we're not murderers, no matter what that corpse valet dreams up in his foolish head." He noted that his firstborn, masculine son was gazing through the window at the garden party. It was hopeless, Don Corleone thought. If he refused to be instructed, Santino could never run the family business, could never become a Don. He would have to find somebody else. And soon. After all, he was not immortal.

From the garden, startling all three men, there came a happy roaring shout. Sonny Corleone pressed close to the window. What he saw made him move quickly toward the door, a delighted smile on his face. "It's Johnny, he came to the wedding, what did I tell you?" Hagen moved to the window. "It's really your godson," he said to Don Corleone. "Shall I bring him here?"

"No," the Don said. "Let the people enjoy him. Let him come to me when he is ready." He smiled at Hagen. "You see? He is a good godson."

Hagen felt a twinge of jealousy. He said dryly, "It's been two years. He's probably in trouble again and wants you to help."

"And who should he come to if not his godfather?" asked Don Corleone.

**************

The first one to see Johnny Fontane enter the garden was Connie Corleone. She forgot her bridal dignity and screamed, "Johneee." Then she ran into his arms. He hugged her tight and kissed her on the mouth, kept his arm around her as others came up to greet him. They were all his old friends, people he had grown up with on the West Side. Then Connie was dragging him to her new husband. Johnny saw with amusement that the blond young man looked a little sour at no longer being the star of the day. He turned on all his charm, shaking the groom's hand, toasting him with a glass of wine.

A familiar voice called from the bandstand, "How about giving us a song, Johnny?" He looked up and saw Nino Valenti smiling down at him. Johnny Fontane jumped up on the bandstand and threw his arms around Nino. They had been inseparable, singing together, going out with girls together, until Johnny had started to become famous and sing on the radio. When he had gone to Hollywood to make movies Johnny had phoned Nino a couple of times just to talk and had promised to get him a club singing date. But he had never done so. Seeing Nino now, his cheerful, mocking, drunken grin, all the affection returned.

Nino began strumming on the mandolin. Johnny Fontane put his hand on Nino's shoulder. "This is for the bride," he said, and stamping his foot, chanted the words to an obscene

Sicilian love song. As he sang, Nino made suggestive motions with his body. The bride blushed proudly, the throng of guests roared its approval. Before the song ended they were all stamping with their feet and roaring out the sly, double-meaning tag line that finished each stanza. At the end they would not stop applauding until Johnny cleared his throat to sing another song.

They were all proud of him. He was of them and he had become a famous singer, a movie star who slept with the most desired women in the world. And yet he had shown proper respect for his Godfather by traveling three thousand miles to attend this wedding. He still loved old friends like Nino Valenti. Many of the people there had seen Johnny and Nino singing together when they were just boys, when no one dreamed that Johnny Fontane would grow up to hold the hearts of fifty million women in his hands.

Johnny Fontane reached down and lifted the bride up onto the bandstand so that Connie stood between him and Nino. Both men crouched down, facing each other, Nino plucking the mandolin for a few harsh chords. It was an old routine of theirs, a mock battle and wooing, using their voices like swords, each shouting a chorus in turn. With the most delicate courtesy, Johnny let Nino's voice overwhelm his own, let Nino take the bride from his arm, let Nino swing into the last victorious stanza while his own voice died away. The whole wedding party broke into shouts of applause, the three of them embraced each other at the end. The guests begged for another song.

Only Don Corleone, standing in the corner entrance of the house, sensed something amiss. Cheerily, with bluff good humor, careful not to give offense to his guests, he called out, "My godson has come three thousand miles to do us honor and no one thinks to wet his throat?" At once a dozen full wineglasses were thrust at Johnny Fontane. He took a sip from all and rushed to embrace his Godfather. As he did so he whispered something into the older man's ear. Don Corleone led him into the house.

Tom Hagen held out his hand when Johnny came into the room. Johnny shook it and said, "How are you, Tom?" But without his usual charm that consisted of a genuine warmth for people. Hagen was a little hurt by this coolness but shrugged it off. It was one of the penalties for being the Don's hatchet man.

Johnny Fontane said to the Don, "When I got the wedding invitation I said to myself, 'My Godfather isn't mad at me anymore.' I called you five times after my divorce and Tom always told me you were out or busy so I knew you were sore."

Don Corleone was filling glasses from the yellow bottle of Strega. "That's all forgotten. Now. Can I do something for you still? You're not too famous, too rich, that I can't help you?"

Johnny gulped down the yellow fiery liquid and held out his glass to be refilled. He tried to sound jaunty. "I'm not rich, Godfather. I'm going down. You were right. I should never have left my wife and kids for that tramp I married. I don't blame you for getting sore at me."

The Don shrugged. "I worried about you, you're my godson, that's all."

Johnny paced up and down the room. "I was crazy about that bitch. The biggest star in Hollywood. She looks like an angel. And you know what she does after a picture? If the makeup man does a good job on her face, she lets him bang her. If the cameraman made her look extra good, she brings him into her dressing room and gives him a screw. Anybody. She uses her body like I use the loose change in my pocket for a tip. A whore made for the devil."

Don Corleone curtly broke in. "How is your family?"

Johnny sighed. "I took care of them. After the divorce I gave Ginny and the kids more than the courts said I should. I go see them once a week. I miss them. Sometimes I think I'm going crazy." He took another drink. "Now my second wife laughs at me. She can't understand my being jealous. She calls me an old-fashioned guinea, she makes fun of my singing. Before I left I gave her a nice beating but not in the face because she was making a picture. I gave her cramps, I punched her on the arms and legs like a kid and she kept laughing at me." He lit a cigarette. "So, Godfather, right now, life doesn't seem worth living."

Don Corleone said simply. "These are troubles I can't help you with." He paused, then asked, "What's the matter with your voice?"

All the assured charm, the self-mockery, disappeared from Johnny Fontane's face. He said almost brokenly, "Godfather, I can't sing anymore, something happened to my throat, the doctors don't know what." Hagen and the Don looked at him with surprise, Johnny had always been so tough. Fontane went on. "My two pictures made a lot of money. I was a big star. Now they throw me out. The head of the studio always hated my guts and now he's paying me off."

Don Corleone stood before his godson and asked grimly, "Why doesn't this man like you?"

"I used to sing those songs for the liberal organizations, you know, all that stuff you never liked me to do. Well, Jack Woltz didn't like it either. He called me a Communist, but he couldn't make it stick. Then I snatched a girl he had saved for himself. It was strictly a one-night stand and she came after me. What the hell could I do? Then my whore second wife throws me out. And Ginny and the kids won't take me back unless I come crawling on my hands and knees, and I can't sing anymore. Godfather, what the hell can I do?"

Don Corleone's face had become cold without a hint of sympathy. He said contemptuously, "You can start by acting like a man." Suddenly anger contorted his face. He shouted. "LIKE A MAN!" He reached over the desk and grabbed Johnny Fontane by the hair of his head in a gesture that was savagely affectionate. "By Christ in heaven, is it possible that you spent so much time in my presence and turned out no better than this? A Hollywood *finocchio* who weeps and begs for pity? Who cries out like a woman--- 'What shall I do? Oh, what shall I do?"'

The mimicry of the Don was so extraordinary, so unexpected, that Hagen and Johnny were

startled into laughter. Don Corleone was pleased. For a moment he reflected on how much he loved this godson. How would his own three sons have reacted to such a tongue-lashing? Santino would have sulked and behaved badly for weeks afterward. Fredo would have been cowed. Michael would have given him a cold smile and gone out of the house, not to be seen for months. But Johnny, ah, what a fine chap he was, smiling now, gathering strength, knowing already the true purpose of his Godfather.

Don Corleone went on. "You took the woman of your boss, a man more powerful than yourself, then you complain he won't help you. What nonsense. You left your family, your children without a father, to marry a whore and you weep because they don't welcome you back with open arms. The whore, you don't hit her in the face because she is making a picture, then you are amazed because she laughs at you. You lived like a fool and you have come to a fool's end."

Don Corleone paused to ask in a patient voice, "Are you willing to take my advice this time?"

Johnny Fontane shrugged. "I can't marry Ginny again, not the way she wants. I have to gamble, I have to drink, I have to go out with the boys. Beautiful broads run after me and I never could resist them. Then I used to feel like a heel when I went back to Ginny. Christ, I can't go through all that crap again."

It was rare that Don Corleone showed exasperation. "I didn't tell you to get married again. Do what you want. It's good you wish to be a father to your children. A man who is not a father to his children can never be a real man. But then, you must make their mother accept you. Who says you can't see them every day? Who says you can't live in the same house? Who says you can't live your life exactly as you want to live it?"

Johnny Fontane laughed. "Godfather, not all women are like the old Italian wives. Ginny won't stand for it."

Now the Don was mocking. "Because you acted like a *finocchio*. You gave her *more* than the court said. You didn't hit the other in the face because she was making a picture. You let women dictate your actions and they are not competent in this world, though certainly they will be saints in heaven while we men burn in hell. And then I've watched you all these years." The Don's voice became earnest. "You've been a fine godson, you've given me all the respect. But what of your other old friends? One year you run around with this person, the next year with another person. That Italian boy who was so funny in the movies, he had some bad luck and you never saw him again because you were more famous. And how about your old, old comrade that you went to school with, who was your partner singing? Nino. He drinks too much out of disappointment but he never complains. He works hard driving the gravel truck and sings weekends for a few dollars. He never says anything against you. You couldn't help him a bit? Why not? He sings well."

Johnny Fontane said with patient weariness, "Godfather, he just hasn't got enough talent. He's OK, but he's not big time."

Don Corleone lidded his eyes almost closed and then said, "And you, godson, you now, you just don't have talent enough. Shall I get you a job on the gravel truck with Nino?" When Johnny didn't answer, the Don went on. "Friendship is everything. Friendship is more than talent. It is more than government. It is almost the equal of family. Never forget that. If you had built up a wall of friendships you wouldn't have to ask me to help. Now tell me, why can't you sing? You sang well in the garden. As well as Nino."

Hagen and Johnny smiled at this delicate thrust. It was Johnny's turn to be patronizingly patient. "My voice is weak. I sing one or two songs and then I can't sing again for hours or days. I can't make it through the rehearsals or the retakes. My voice is weak, it's got some sort of sickness."

"So you have woman trouble. Your voice is sick. Now tell me the trouble you're having with this Hollywood *pezzonovante* who won't let you work." The Don was getting down to business.

"He's bigger than one of your *pezzonovantes*," Johnny said. "He owns the studio. He advises the President on movie propaganda for the war. Just a month ago he bought the movie rights to the biggest novel of the year. A best seller. And the main character is a guy just like me. I wouldn't even have to act, just be myself. I wouldn't even have to sing. I might even win the Academy Award. Everybody knows it's perfect for me and I'd be big again. As an actor. But that bastard Jack Woltz is paying me off, he won't give it to me. I offered to do it for nothing, for a minimum price and he still says no. He sent the word that if I come and kiss his ass in the studio commissary, maybe he'll think about it."

Don Corleone dismissed this emotional nonsense with a wave of his hand. Among reasonable men problems of business could always be solved. He patted his godson on the shoulder. "You're discouraged. Nobody cares about you, so you think. And you've lost a lot of weight. You drink a lot, eh? You don't sleep and you take pills?" He shook his head disapprovingly.

"Now I want you to follow my orders," the Don said. "I want you to stay in my house for one month. I want you to eat well, to rest and sleep. I want you to be my companion, I enjoy your company, and maybe you can learn something about the world from your Godfather that might even help you in the great Hollywood. But no singing, no drinking and no women. At the end of the month you can go back to Hollywood and this *pezzonovante*, this .90 caliber will give you that job you want. Done?"

Johnny Fontane could not altogether believe that the Don had such power. But his Godfather had never said such and such a thing could be done without having it done. "This guy is a personal friend of J. Edgar Hoover," Johnny said. "You can't even raise your voice to him."

"He's a businessman," the Don said blandly. "I'll make him an offer he can't refuse."

"It's too late," Johnny said. "All the contracts have been signed and they start shooting in a week. It's absolutely impossible."

Don Corleone said, "Go, go back to the party. Your friends are waiting for you. Leave everything to me." He pushed Johnny Fontane out of the room.

Hagen sat behind the desk and made notes. The Don heaved a sigh and asked, "Is there anything else?"

"Sollozzo can't be put off any more. You'll have to see him this week." Hagen held his pen over the calendar.

The Don shrugged. "Now that the wedding is over, whenever you like."

This answer told Hagen two things. Most important, that the answer to Virgil Sollozzo would be no. The second, that Don Corleone, since he would not give the answer before his daughter's wedding, expected his no to cause trouble.

Hagen said cautiously, "Shall I tell Clemenza to have some men come live in the house?"

The Don said impatiently, "For what? I didn't answer before the wedding because on an important day like that there should be no cloud, not even in the distance. Also I wanted to know beforehand what he wanted to talk about. We know now. What he will propose is an *infamita*."

Hagen asked, "Then you will refuse?" When the Don nodded, Hagen said, "I think we should all discuss it--- the whole Family--- before you give your answer."

The Don smiled. "You think so? Good, we will discuss it. When you come back from California. I want you to fly there tomorrow and settle this business for Johnny. See that movie *pezzonovante*. Tell Sollozzo I will see him when you get back from California. Is there anything else?"

Hagen said formally, "The hospital called. *Consigliere* Abbandando is dying, he won't last out the night. His family was told to come and wait."

Hagen had filled the *Consigliere's* post for the past year, ever since the cancer had imprisoned Genco Abbandando in his hospital bed. Now he waited to hear Don Corleone say the post was his permanently. The odds were against it. So high a position was traditionally given only to a man descended from two Italian parents. There had already been trouble about his temporary performance of the duties. Also, he was only thirty-five, not old enough, supposedly, to have acquired the necessary experience and cunning for a successful *Consigliere*.

But the Don gave him no encouragement. He asked, "When does my daughter leave with her bridegroom?"

Hagen looked at his wristwatch. "In a few minutes they'll cut the cake and then a half hour after that." That reminded him of something else. "Your new son-in-law. Do we give him

something important, inside the Family?"

He was surprised at the vehemence of the Don's answer. "Never." The Don hit the desk with the flat of his hand. "Never. Give him something to earn his living, a good living. But never let him know the Family's business. Tell the others, Sonny, Fredo, Clemenza."

The Don paused. "Instruct my sons, all three of them, that they will accompany me to the hospital to see poor Genco. I want them to pay their last respects. Tell Freddie to drive the big car and ask Johnny if he will come with us, as a special favor to me." He saw Hagen look at him questioningly. "I want you to go to California tonight. You won't have time to go see Genco. But don't leave until I come back from the hospital and speak with you. Understood?"

"Understood," Hagen said. "What time should Fred have the car waiting?" "When the guests have left," Don Corleone said. "Genco will wait for me."

"The Senator called," Hagen said. "Apologizing for not coming personally but that you would understand. He probably means those two FBI men across the street taking down license numbers. But he sent his gift over by special messenger."

The Don nodded. He did not think it necessary to mention that he himself had warned the Senator not to come. "Did he send a nice present?"

Hagen made a face of impressed approval that was very strangely Italian on his German-Irish features. "Antique silver, very valuable. The kids can sell it for a grand at least. The Senator spent a lot of time getting exactly the right thing. For those kind of people that's more important than how much it costs."

Don Corleone did not hide his pleasure that so great a man as the Senator had shown him such respect. The Senator, like Luca Brasi, was one of the great stones in the Don's power structure, and he too, with this gift, had resworn his loyalty.

**************

When Johnny Fontane appeared in the garden, Kay Adams recognized him immediately. She was truly surprised. "You never told me your family knew Johnny Fontane," she said. "Now I'm sure I'll marry you."

"Do you want to meet him?" Michael asked.

"Not now," Kay said. She sighed. "I was in love with him for three years. I used to come down to New York whenever he sang at the Capitol and scream my head off. He was so wonderful."

"We'll meet him later," Michael said.

When Johnny finished singing and vanished into the house with Don Corleone, Kay said archly to Michael, "Don't tell me a big movie star like Johnny Fontane has to ask your father for a favor?"

"He's my father's godson," Michael said. "And if it wasn't for my father he might not be a big movie star today."

Kay Adams laughed with delight. "That sounds like another great story." Michael shook his head "I can't tell that one," he said.

"Trust me," she said.

He told her. He told her without being funny. He told it without pride. He told it without any sort of explanation except that eight years before his father had been more impetuous, and because the matter concerned his godson, the Don considered it an affair of personal honor.

The story was quickly told. Eight years ago Johnny Fontane had made an extraordinary success singing with a popular dance band. He had become a top radio attraction. Unfortunately the band leader, a well-known show business personality named Les Halley, had signed Johnny to a five-year personal services contract. It was a common show business practice. Les Halley could now loan Johnny out and pocket most of the money.

Don Corleone entered the negotiations personally. He offered Les Halley twenty thousand dollars to release Johnny Fontane from the personal services contract. Halley offered to take only fifty percent of Johnny's earnings. Don Corleone was amused. He dropped his offer from twenty thousand dollars to ten thousand dollars. The band leader, obviously not a man of the world outside his beloved show business, completely missed the significance of this lower offer. He refused.

The next day Don Corleone went to see the band leader personally. He brought with him his two best friends, Genco Abbandando, who was his *Consigliere*, and Luca Brasi. With no other witnesses Don Corleone persuaded Les Halley to sign a document giving up all rights to all services from Johnny Fontane upon payment of a certified check to the amount of ten thousand dollars. Don Corleone did this by putting a pistol to the forehead of the band leader and assuring him with the utmost seriousness that either his signature or his brains would rest on that document in exactly one minute. Les Halley signed. Don Corleone pocketed his pistol and handed over the certified check.

The rest was history. Johnny Fontane went on to become the greatest singing sensation in the country. He made Hollywood musicals that earned a fortune for his studio. His records made millions of dollars. Then he divorced his childhood-sweetheart wife and left his two children, to marry the most glamorous blond star in motion pictures. He soon learned that she was a "whore." He drank, he gambled, he chased other women. He lost his singing voice. His records stopped selling. The studio did not renew his contract. And so now he had come back to his Godfather.

Kay said thoughtfully, "Are you sure you're not jealous of your father? Everything you've told me about him shows him doing something for other people. He must be goodhearted." She smiled wryly. "Of course his methods are not exactly constitutional."

Michael sighed. "I guess that's the way it sounds, but let me tell you this. You know those Arctic explorers who leave caches of food scattered on the route to the North Pole? Just in case they may need them someday? That's my father's favors. Someday he'll be at each one of those people's houses and they had better come across."

**************

It was nearly twilight before the wedding cake was shown, exclaimed over and eaten. Specially baked by Nazorine, it was cleverly decorated with shells of cream so dizzyingly delicious that the bride greedily plucked them from the corpse of the cake before she whizzed away on her honeymoon with her blond groom. The Don politely sped his guests' departure, noting meanwhile that the black sedan with its FBI men was no longer visible.

Finally the only car left in the driveway was the long black Cadillac with Freddie at the wheel. The Don got into the front seat, moving with quick coordination for his age and bulk. Sonny, Michael and Johnny Fontane got into the back seat. Don Corleone said to his son Michael, "Your girl friend, she'll get back to the city by herself all right?"

Michael nodded. "Tom said he'd take care of it." Don Corleone nodded with satisfaction at Hagen's efficiency.

Because of the gas rationing still in effect, there was little traffic on the Belt Parkway to Manhattan. In less than an hour the Cadillac rolled into the street of French Hospital. During the ride Don Corleone asked his youngest son if he was doing well in school. Michael nodded. Then Sonny in the back seat asked his father, "Johnny says you're getting him squared away with that Hollywood business. Do you want me to go out there and help?"

Don Corleone was curt. "Tom is going tonight. He won't need any help, it's a simple affair."

Sonny Corleone laughed. "Johnny thinks you can't fix it, that's why I thought you might want me to go out there."

Don Corleone turned his head. "Why do you doubt me?" he asked Johnny Fontane. "Hasn't your Godfather always done what he said he would do? Have I ever been taken for a fool?"

Johnny apologized nervously. "Godfather, the man who runs it is a real .90 caliber *pezzonovante*. You can't budge him, not even with money. He has big connections. And he hates me. I just don't know how you can swing it."

The Don spoke with affectionate amusement. "I say to you: you shall have it." He nudged Michael with his elbow. "We won't disappoint my godson, eh, Michael?"

Michael, who never doubted his father for a moment, shook his head.

As they walked toward the hospital entrance, Don Corleone put his hand on Michael's arm so that the others forged ahead. "When you get through with college, come and talk to me," the Don said. "I have some plans you will like."

Michael didn't say anything. Don Corleone grunted in exasperation. "I know how you are. I won't ask you to do anything you don't approve of. This is something special. Go your own way now, you're a man after all. But come to me as a son should when you have finished with your schooling."

**************

The family of Genco Abbandando, wife and three daughters dressed in black, clustered like a flock of plump crows on the white tile floor of the hospital corridor. When they saw Don Corleone come out of the elevator, they seemed to flutter up off the white tiles in an instinctive surge toward him for protection. The mother was regally stout in black, the daughters fat and plain. Mrs. Abbandando pecked at Don Corleone's cheek, sobbing, wailing, "Oh, what a saint you are, to come here on your daughter's wedding day."

Don Corleone brushed these thanks aside. "Don't I owe respect to such a friend, a friend who has been my right arm for twenty, years?" He had understood immediately that the soon-to-be widow did not comprehend that her husband would die this night. Genco Abbandando had been in this hospital for nearly a year dying of his cancer and the wife had come to consider his fatal illness almost an ordinary part of life. Tonight was just another crisis. She babbled on. "Go in and see my poor husband," she said, "he asks for you. Poor man, he wanted to come to the wedding to show his respect but the doctor would not permit it. Then he said you would come to see him on this great day but I did not believe it possible. Ah, men understand friendship more than we women. Go inside, you will make him happy."

A nurse and a doctor came out of Genco Abbandando's private room. The doctor was a young man, serious-faced and with the air of one born to command, that is to say, the air of one who has been immensely rich all his life. One of the daughters asked timidly, "Dr. Kennedy, can we go to see him now?"

Dr. Kennedy looked over the large group with exasperation. Didn't these people realize that the man inside was dying and dying in torturous pain? It would be much better if everyone let him die in peace. "I think just the immediate family," he said in his exquisitely polite voice. He was surprised when the wife and daughters turned to the short, heavy man dressed in an awkwardly fitted tuxedo, as if to hear his decision.

The heavy man spoke. There was just the slightest trace of an Italian accent in his voice. "My dear doctor," said Don Corleone, "is it true he is dying?"

"Yes," said Dr. Kennedy.

"Then there is nothing more for you to do," said Don Corleone. "We will take up the burden. We will comfort him. We will close his eyes. We will bury him and weep at his funeral and afterwards we will watch over his wife and daughters." At hearing things put so bluntly, forcing her to understand, Mrs. Abbandando began to weep.

Dr. Kennedy shrugged. It was impossible to explain to these peasants. At the same time he recognized the crude justice in the man's remarks. His role was over. Still exquisitely polite, he said, "Please wait for the nurse to let you in, she has a few necessary things to do with the patient." He walked away from them down the corridor, his white coat flapping.

The nurse went back into the room and they waited. Finally she came out again, holding the door for them to enter. She whispered, "He's delirious with the pain and fever, try not to excite him. And you can stay only a few minutes, except for the wife." She recognized Johnny Fontane as he went by her and her eyes opened wide. He gave her a faint smile of acknowledgment and she stared at him with frank invitation. He filed her away for future reference, then followed the others into the sick man's room.

Genco Abbandando had run a long race with death, and now, vanquished, he lay exhausted on the raised bed. He was wasted away to no more than a skeleton, and what had once been vigorous black hair had turned into obscene stringy wisps. Don Corleone said cheerily, "Genco, dear friend, I have brought my sons to pay their respects, and look, even Johnny, all the way from Hollywood."

The dying man raised his fevered eyes gratefully to the Don. He let the young men clasp his bony hand in their fleshy ones. His wife and daughters ranged themselves along his bed, kissing his cheek, taking his other hand in turn.

The Don pressed his old friend's hand. He said comfortingly, "Hurry up and get better and we'll take a trip back to Italy together to our old village. We'll play *boccie* in front of the wineshop like our fathers before us."

The dying man shook his head. He motioned the young men and his family away from his bedside; with the other bony claw he hung fast to the Don. He tried to speak. The Don put his head down and then sat on the bedside chair. Genco Abbandando was babbling about their childhood. Then his coal-black eyes became sly. He whispered. The Don bent closer. The others in the room were astonished to see tears running down Don Corleone's face as he shook his head. The quavering voice grew louder, filling the room. With a tortured, superhuman effort, Abbandando lifted his head off his pillow, eyes unseeing, and pointed a skeletal forefinger at the Don. "Godfather, Godfather," he called out blindly, "save me from death, I beg of you. My flesh is burning off my bones and I can feel the worms eating away my brain. Godfather, cure me, you have the power, dry the tears of my poor wife. In Corleone we played together as children and now will you let me die when I fear hell for my sins?"

The Don was silent. Abbandando said, "It is your daughter's wedding day, you cannot refuse me."

The Don spoke quietly, gravely, to pierce through the blasphemous delirium. "Old friend," he said, "I have no such powers. If I did I would be more merciful than God, believe me. But don't fear death and don't fear hell. I will have a mass said for your soul every night and every morning. Your wife and your children will pray for you. How can God punish you with so many pleas for mercy?"

The skeleton face took on a cunning expression that was obscene. Abbandanda said slyly, "It's been arranged then?"

When the Don answered, his voice was cold, without comfort. "You blaspheme. Resign yourself."

Abbandando fell back on the pillow. His eyes lost their wild gleam of hope. The nurse came back into the room and started shooing them out in a very matter-of-fact way. The Don got up but Abbandando put out his hand. "Godfather," he said, "stay here with me and help me meet death. Perhaps if He sees you near me He will be frightened and leave me in peace. Or perhaps you can say a word, pull a few strings, eh?" The dying man winked as if he were mocking the Don, now not really serious. "You're brothers in blood, after all." Then, as if fearing the Don would be offended, he clutched at his hand. "Stay with me, let me hold your hand. We'll outwit that bastard as we've outwitted others. Godfather, don't betray me."

The Don motioned the other people out of the room. They left. He took the withered claw of Genco Abbandando in his own two broad hands. Softly, reassuringly, he comforted his friend, as they waited for death together. As if the Don could truly snatch the life of Gencp Abbandando back from that most foul and criminal traitor to man.

**************

The wedding day of Connie Corleone ended well for her. Carlo Rizzi performed his duties as a bridegroom with skill and vigor, spurred on by the contents of the bride's gift purse which totaled up to over twenty thousand dollars. The bride, however, gave up her virginity with a great deal more willingness than she gave up her purse. For the latter, he had to blacken one of her eyes.

Lucy Mancini waited in her house for a call from Sonny Corleone, sure that he would ask her for a date. Finally she called his house and when she heard a woman's voice answer the phone she hung up. She had no way of knowing that nearly everyone at the wedding had remarked the absence of her and Sonny for that fatal half hour and the gossip was already spreading that Santino Corleone had found another victim. That he had "done the job" on his own sister's maid of honor.

Amerigo Bonasera had a terrible nightmare. In his dreams he saw Don Corleone, in peaked cap, overalls and heavy gloves, unloading bullet-riddled corpses in front of his funeral parlor and shouting, "Remember, Amerigo, not a word to anyone, and bury them quickly." He groaned so loud and long in his sleep that his wife shook him awake. "Eh, what a man you are," she grumbled. "To have a nightmare only after a wedding."

Kay Adams was escorted to her New York City hotel by Paulie Gatto and Clemenza. The car was large, luxurious and driven by Gatto. Clemenza sat in the back seat and Kay was given the front seat next to the driver. She found both men wildly exotic. Their speech was movie Brooklynese and they treated her with exaggerated courtliness. During the ride she chatted casually with both men and was surprised when they spoke of Michael with unmistakable affection and respect. He had led her to believe that he was an alien in his father's world. Now Clemenza was assuring her in his wheezing guttural voice that the "old man" thought Mike was the best of his sons, the one who would surely inherit the family business.

"What business is that?" Kay asked in the most natural way.

Paulie Gatto gave her a quick glance as he turned the wheel. Behind her Clemenza said in a surprised voice. "Didn't Mike tell you? Mr. Corleone is the biggest importer of Italian olive oil in the States. Now that the war is over the business could get real rich. He'll need a smart boy like Mike."

At the hotel Clemenza insisted on coming to the desk with her. When she protested, he said simply, "The boss said to make sure you got home OK. I gotta do it."

After she received her room key he walked her to the elevator and waited until she got in. She waved to him, smiling, and was surprised at his genuine smile of pleasure in return. It was just as well she did not see him go back to the hotel clerk and ask, "What name she registered under?"

The hotel clerk looked at Clemenza coldly. Clemenza rolled the little green spitball he was holding in his hand across to the clerk, who picked it up and immediately said, "Mr. and Mrs. Michael Corleone."

Back in the car, Paulie Gatto said, "Nice dame."

Clemenza grunted. "Mike is doing the job on her." Unless, he thought, they were really married. "Pick me up early in the morning," he told Paulie Gatto. "Hagen got some deal for us that gotta be done right away."

**************

It was late Sunday night before Tom Hagen could kiss his wife good-bye and drive out to the airport. With his special number one priority (a grateful gift from a Pentagon staff general officer) he had no trouble getting on a plane to Los Angeles.

It had been a busy but satisfying day for Tom Hagen. Genco Abbandando had died at three in the morning and when Don Corleone returned from the hospital, he had informed Hagen that he was now officially the new *Consigliere* to the family. This meant that Hagen was sure to become a very rich man, to say nothing of power.

The Don had broken a long-standing tradition. The *Consigliere* was always a full-blooded

Sicilian, and the fact that Hagen had been brought up as a member of the Don's family made no difference to that tradition. It was a question of blood. Only a Sicilian born to the ways of *ormerta*, the law of silence, could be trusted in the key post of *Consigliere*. Between the head of the family, Don Corleone, who dictated policy, and the operating level of men who actually carried out the orders of the Don, there were three layers, or buffers. In that way nothing could be traced to the top. Unless the *Consigliere* turned traitor. That Sunday morning Don Corleone gave explicit instructions on what should be done to the two young men who had beaten the daughter of Amerigo Bonasera. But he had given those orders in private to Tom Hagen. Later in the day Hagen had, also in private without witnesses, instructed Clemenza. In turn Clemenza had told Paulie Gatto to execute the commission. Paulie Gatto would now muster the necessary manpower and execute the orders. Paulie Gatto and his men would not know why this particular task was being carried out or who had ordered it originally. Each link of the chain would have to turn traitor for the Don to be involved and though it had never yet happened, there was always the possibility. The cure for that possibility also was known. Only one link in the chain had to disappear.

The *Consigliere* was also what his name implied. He was the counselor to the Don, his right-hand man, his auxiliary brain. He was also his closest companion and his closest friend. On important trips he would drive the Don's car, at conferences he would go out and get the Don refreshments, coffee and sandwiches, fresh cigars. He would know everything the Don knew or nearly everything, all the cells of power. He was the one man in the world who could bring the Don crashing down to destruction. But no *Consigliere* had ever betrayed a Don, not in the memory of any of the powerful Sicilian families who had established themselves in America. There was no future in it. And every *Consigliere* knew that if he kept the faith, he would become rich, wield power and win respect. If misfortune came, his wife and children would be sheltered and cared for as if he were alive or free. *If he kept the faith.*

In some matters the *Consigliere* had to act for his Don in a more open way and yet not involve his principal. Hagen was flying to California on just such a matter. He realized that his career as *Consigliere* would be seriously affected by the success or failure of this mission. By family business standards whether Johnny Fontane got his coveted part in the war movie, or did not, was a minor matter. Far more important was the meeting Hagen had set up with Virgil Sollozzo the following Friday. But Hagen knew that to the Don, both were of equal importance, which settled the matter for any good *Consigliere*.

The piston plane shook Tom Hagen's already nervous insides and he ordered a martini from the hostess to quiet them. Both the Don and Johnny had briefed him on the character of the movie producer, Jack Woltz. From everything that Johnny said, Hagen knew he would never be able to persuade Woltz. But he also had no doubt whatsoever that the Don would keep his promise to Johnny. His own role was that of negotiator and contact.

Lying back in his seat, Hagen went over all the information given to him that day. Jack Woltz was one of the three most important movie producers in Hollywood, owner of his own studio with dozens of stars under contract. He was on the President of the United States' Advisory Council for War Information, Cinematic Division, which meant simply that he helped make propaganda movies. He had had dinner at the White House. He had entertained

J. Edgar Hoover in his Hollywood home. But none of this was as impressive as it sounded. They were all official relationships. Woltz didn't have any personal political power, mainly because he was an extreme reactionary, partly because he was a megalomaniac who loved to wield power wildly without regard to the fact that by so doing legions of enemies sprang up out of the ground.

Hagen sighed. There would be no way to "handle" Jack Woltz. He opened his briefcase and tried to get some paper work done, but he was too tired. He ordered another martini and reflected on his life. He had no regrets, indeed he felt that he had been extremely lucky. Whatever the reason, the course he had chosen ten years ago had proved to be right for him. He was successful, he was as happy as any grown man could reasonably expect, and he found life interesting.

Tom Hagen was thirty-five years old, a tall crew-cut man, very slender, very ordinary-looking. He was a lawyer but did not do the actual detailed legal work for the Corleone family business though he had practiced law for three years after passing the bar exam.

At the age of eleven he had been a playmate of eleven-year-old Sonny Corleone. Hagen's mother had gone blind and then died during his eleventh year. Hagen's father, a heavy drinker, had become a hopeless drunkard. A hardworking carpenter, he had never done a dishonest thing in his life. But his drinking destroyed his family and finally killed him. Tom Hagen was left an orphan who wandered the streets and slept in hallways. His younger sister had been put in a foster home, but in the 1920's the social agencies did not follow up cases of eleven-year-old boys who were so ungrateful as to run from their charity. Hagen, too, had an eye infection. Neighbors whispered that he had caught or inherited it from his mother and so therefore it could be caught from him. He was shunned. Sonny Corleone, a warmhearted and imperious eleven-year-old, had brought his friend home and demanded that he be taken in. Tom Hagen was given a hot dish of spaghetti with oily rich tomato sauce, the taste of which he had never forgotten, and then given a metal folding bed to sleep on.

In the most natural way, without a word being spoken or the matter discussed in any fashion, Don Corleone had permitted the boy to stay in his household. Don Corleone himself took the boy to a special doctor and had his eye infection cured. He sent him to college and law school. In all this the Don acted not as a father but rather as a guardian. There was no show of affection but oddly enough the Don treated Hagen more courteously than his own sons, did not impose a parental will upon him. It was the boy's decision to go to law school after college. He had heard Don Corleone say once, "A lawyer with his briefcase can steal more than a hundred men with guns." Meanwhile, much to the annoyance of their father, Sonny and Freddie insisted on going into the family business after graduation from high school. Only Michael had gone on to college, and he had enlisted in the Marines the day after Pearl Harbor.

After he passed the bar exam, Hagen married to start his own family. The bride was a young Italian girl from New Jersey, rare at that time for being a college graduate. After the wedding, which was of course held in the home of Don Corleone, the Don offered to support Hagen in any undertaking he desired, to send him law clients, furnish his office, start him in

real estate.

Tom Hagen had bowed his head and said to the Don, "I would like to work for you." The Don was surprised, yet pleased. "You know who I am?" he asked.

Hagen nodded. He hadn't really known the extent of the Don's power, not then. He did not really know in the ten years that followed until he was made the acting *Consigliere* after Genco Abbandando became ill. But he nodded and met the Don's eyes with his own. "I would work for you like your sons," Hagen said, meaning with complete loyalty, with complete acceptance of the Don's parental divinity. The Don, with that understanding which was even then building the legend of his greatness, showed the young man the first mark of fatherly affection since he hadcome into his household. He took Hagen into his arms for a quick embrace and afterward treated him more like a true son, though he would sometimes say, "Tom, never forget your parents," as if he were reminding himself as well as Hagen.

There was no chance that Hagen would forget. His mother had been near moronic and slovenly, so ridden by anemia she could not feel affection for her children or make a pretense of it. His father Hagen had hated. His mother's blindness before she died had terrified him and his own eye infection had been a stroke of doom. He had been sure he would go blind. When his father died, Tom Hagen's eleven-year-old mind had snapped in a curious way. He had roamed the streets like an animal waiting for death until the fateful day Sonny found him sleeping in the back of a hallway and brought him to his home. What had happened afterward was a miracle. But for years Hagen had had nightmares, dreaming he had grown to manhood blind, tapping a white cane, his blind children behind him tap-tapping with their little white canes as they begged in the streets. Some mornings when he woke the face of Don Corleone was imprinted on his brain in that first conscious moment and he would feel safe.

But the Don had insisted that he put in three years of general law practice in addition to his duties for the family business. This experience had proved invaluable later on, and also removed any doubts in Hagen's mind about working for Don Corleone. He had then spent two years of training in the offices of a top firm of criminal lawyers in which the Don had some influence. It was apparent to everyone that he had a flair for this branch of the law. He did well and when he went into the full-time service of the family business, Don Corleone had not been able to reproach him once in the six years that followed.

When he had been made the acting *Consigliere*, the other powerful Sicilian families referred contemptuously to the Corleone family as the "Irish gang." This had amused Hagen. It had also taught him that he could never hope to succeed the Don as the head of the family business. But he was content. That had never been his goal, such an ambition would have been a "disrespect" to his benefactor and his benefactor's blood family.

**************

It was still dark when the plane landed in Los Angeles. Hagen checked into his hotel, showered and shaved, and watched dawn come over the city. He ordered breakfast and

newspapers to be sent up to his room and relaxed until it was time for his ten A.M. appointment with Jack Woltz. The appointment had been surprisingly easy to make.

The day before, Hagen had called the most powerful man in the movie labor unions, a man named Billy Goff. Acting on instructions from Don Corleone, Hagen had told Goff to arrange an appointment on the next day for Hagen to call on Jack Woltz, that he should hint to Woltz that if Hagen was not made happy by the results of the interview, there could be a labor strike at the movie studio. An hour later Hagen received a call from Goff. The appointment would be at ten A.M. Woltz had gotten the message about the possible labor strike but hadn't seemed too impressed, Goff said. He added, "If it really comes down to that, I gotta talk to the Don myself."

"If it comes to that he'll talk to you," Hagen said. By saying this he avoided making any promises. He was not surprised that Goff was so agreeable to the Don's wishes. The family empire, technically, did not extend beyond the New York area but Don Corleone had first become strong by helping labor leaders. Many of them still owed him debts of friendship.

But the ten A.M. appointment was a bad sign. It meant that he would be first on the appointment list, that he would not be invited to lunch. It meant that Woltz held him in small worth. Goff had not been threatening enough, probably because Woltz had him on his graft payroll. And sometimes the Don's success in keeping himself out of the limelight worked to the disadvantage of the family business, in that his name did not mean anything to outside circles.

His analysis proved correct. Woltz kept him waiting for a half hour past the appointed time. Hagen didn't mind. The reception room was very plush, very comfortable, and on a plum-colored couch opposite him sat the most beautiful child Hagen had ever seen. She was no more than eleven or twelve, dressed in a very expensive but simple way as a grown woman. She had incredibly golden hair, huge deep sea-blue eyes and a fresh raspberry-red mouth. She was guarded by a woman obviously her mother, who tried to stare Hagen down with a cold arrogance that made him want to punch her in the face. The angel child and the dragon mother, Hagen thought, returning the mother's cold stare.

Finally an exquisitely dressed but stout middle-aged woman came to lead him through a string of offices to the office-apartment of the movie producer. Hagen was impressed by the beauty of the offices and the people working in them. He smiled. They were all shrewdies, trying to get their foot in the movie door by taking office jobs; and most of them would work in these offices for the rest of their lives or until they accepted defeat and returned to their home towns.

Jack Woltz was a tall, powerfully built man with a heavy paunch almost concealed by his perfectly tailored suit. Hagen knew his history. At ten years of age Woltz had hustled empty beer kegs and pushcarts on the East Side. At twenty he helped his father sweat garment workers. At thirty he had left New York and moved West, invested in the nickelodeon and pioneered motion pictures. At forty-eight he had been the most powerful movie magnate in Hollywood, still rough-spoken, rapaciously amorous, a raging wolf ravaging helpless flocks of young starlets. At fifty he transformed himself. He took speech lessons, learned how to

dress from an English valet and how to behave socially from an English butler. When his first wife died he married a world-famous and beautiful actress who didn't like acting. Now at the age of sixty he collected old master paintings, was a member of the President's Advisory Committee, and had set up a multimillion-dollar foundation in his name to promote art in motion pictures. His daughter had married an English lord, his son an Italian princess.

His latest passion, as reported dutifully by every movie columnist in America, was his own racing stables on which he had spent ten million dollars in the past year. He had made headlines by purchasing the famed English racing horse Khartoum for the incredible price of six hundred thousand dollars and then announcing that the undefeated racer would be retired and put to stud exclusively for the Woltz stables.

He received Hagen courteously, his beautifully, evenly tanned, meticulously barbered face contorted with a grimace meant to be a smile. Despite all the money spent, despite the ministrations of the most knowledgeable technicians, his age showed; the flesh of his face looked as if it had been seamed together. But there was an enormous vitality in his movements and he had what Don Corleone had, the air of a man who commanded absolutely the world in which he lived.

Hagen came directly to the point. That he was an emissary from a friend of Johnny Fontane. That this friend was a very powerful man who would pledge his gratitude and undying friendship to Mr. Woltz if Mr. Woltz would grant a small favor. The small favor would be the casting of Johnny Fontane in the new war movie the studio planned to start next week.

The seamed face was impassive, polite. "What favors can your friend do me?" Woltz asked. There was just a trace of condescension in his voice.

Hagen ignored the condescension. He explained. "You've got some labor trouble coming up. My friend can absolutely guarantee to make that trouble disappear. You have a top male star who makes a lot of money for your studio but he just graduated from marijuana to heroin. My friend will guarantee that your male star won't be able to get any more heroin. And if some other little things come up over the years a phone call to me can solve your problems."

Jack Woltz listened to this as if he were hearing the boasting of a child. Then he said harshly, his voice deliberately all East Side, "You trying to put muscle on me?"

Hagen said coolly, "Absolutely not. I've come to ask a service for a friend. I've tried to explain that you won't lose anything by it."

Almost as if he willed it, Woltz made his face a mask of anger. The mouth curled, his heavy brows, dyed black, contracted to form a thick line over his glinting eyes. He leaned over the desk toward Hagen. "All right, you smooth son of a bitch, let me lay it on the line for you and your boss, whoever he is. Johnny Fontane never gets that movie. I don't care how many guinea Mafia goombahs come out of the woodwork." He leaned back. "A word

of advice to you, my friend. J. Edgar Hoover, I assume you've heard of him"--- Woltz smiled sardonically--- "is a personal friend of mine. If I let him know I'm being pressured, you guys will never know what hit you."

Hagen listened patiently. He had expected better from a man of Woltz's stature. Was it possible that a man who acted this stupidly could rise to the head of a company worth hundreds of millions? That was something to think about since the Don was looking for new things to put money into, and if the top brains of this industry were so dumb, movies might be the thing. The abuse itself bothered him not at all. Hagen had learned the art of negotiation from the Don himself. "Never get angry," the Don had instructed. "Never make a threat. Reason with people." The word "reason" sounded so much better in Italian, *ragione*, to rejoin. The art of this was to ignore all insults, all threats; to turn the other cheek. Hagen had seen the Don sit at a negotiating table for eight hours, swallowing insults, trying to persuade a notorious and megalomaniac strong-arm man to mend his ways. At the end of the eight hours Don Corleone had thrown up his hands in a helpless gesture and said to the other men at the table, "But no one can reason with this fellow," and had stalked out of the meeting room. The strong-arm man had turned white with fear. Emissaries were sent to bring the Don back into the room. An agreement was reached but two months later the strong-arm was shot to death in his favorite barbershop.

So Hagen started again, speaking in the most ordinary voice. "Look at my card," he said. "I'm a lawyer. Would I stick my neck out? Have I uttered one threatening word? Let me just say that I am prepared to meet any condition you name to get Johnny Fontane that movie. I think I've already offered a great deal for such a small favor. A favor that I understand it would be in your interest to grant. Johnny tells me that you admit he would be perfect for that part. And let me say that this favor would never be asked if that were not so. In fact, if you're worried about your investment, my client would finance the picture. But please let me make myself absolutely clear. We understand your no is no. Nobody can force you or is trying to. We know about your friendship with Mr. Hoover, I may add, and my boss respects you for it. He respects that relationship very much."

Woltz had been doodling with a huge, red-feathered pen. At the mention of money his interest was aroused and he stopped doodling. He said patronizingly, "This picture is budgeted at five million."

Hagen whistled softly to show that he was impressed. Then he said very casually, "My boss has a lot of friends who back his judgment."

For the first time Woltz seemed to take the whole thing seriously. He studied Hagen's card. "I never heard of you," he said. "I know most of the big lawyers in New York, but just who the hell are you?"

"I have one of those dignified corporate practices," Hagen said dryly. "I just handle this one account." He rose. "I won't take up any more of your time." He held out his hand, Woltz shook it. Hagen took a few steps toward the door and turned to face Woltz again. "I understand you have to deal with a lot of people who try to seem more important than they are. In my case the reverse is true. Why don't you check me out with our mutual friend? If

you reconsider, call me at my hotel." He paused. "This may be sacrilege to you, but my client can do things for you that even Mr. Hoover might find out of his range." He saw the movie producer's eyes narrowing. Woltz was finally getting the message. "By the way, I admire your pictures very much," Hagen said in the most fawning voice he could manage. "I hope you can keep up the good work. Our country needs it."

Late that afternoon Hagen received a call from the producer's secretary that a car would pick him up within the hour to take him out to Mr. Woltz's country home for dinner. She told him it would be about a three-hour drive but that the car was equipped with a bar and some hors d'oeuvres. Hagen knew that Woltz made the trip in his private plane and wondered why he hadn't been invited to make the trip by air. The secretary's voice was adding politely, "Mr. Woltz suggested you bring an overnight bag and he'll get you to the airport in the morning."

"I'll do that," Hagen said. That was another thing to wonder about. How did Woltz know he was taking the morning plane back to New York? He thought about it for a moment. The most likely explanation was that Woltz had set private detectives on his trail to get all possible information. Then Woltz certainly knew he represented the Don, which meant that he knew something about the Don, which in turn meant that he was now ready to take the whole matter seriously. Something might be done after all, Hagen thought. And maybe Woltz was smarter than he had appeared this morning.

**************

The home of Jack Woltz looked like an implausible movie set. There was a plantation-type mansion, huge grounds girdled by a rich black-dirt bridle path, stables and pasture for a herd of horses. The hedges, flower beds and grasses were as carefully manicured as a movie star's nails.

Woltz greeted Hagen on a glass-paneled air-conditioned porch. The producer was informally dressed in blue silk shirt open at the neck, mustard-colored slacks, soft leather sandals. Framed in all this color and rich fabric his seamed, tough face was startling. He handed Hagen an outsized martini glass and took one for himself from the prepared tray. He seemed more friendly than he had been earlier in the day. He put his arm over Hagen's shoulder and said, "We have a little time before dinner, let's go look at my horses." As they walked toward the stables he said, "I checked you out, Tom; you should have told me your boss is Corleone. I thought you were just some third-rate hustler Johnny was running in to bluff me. And I don't bluff. Not that I want to make enemies, I never believed in that. But let's just enjoy ourselves now. We can talk business after dinner."

Surprisingly Woltz proved to be a truly considerate host. He explained his new methods, innovations that he hoped would make his stable the most successful in America. The stables were all fire-proofed, sanitized to the highest degree, and guarded by a special security detail of private detectives. Finally Woltz led him to a stall which had a huge bronze plaque attached to its outside wall. On the plaque was the name "Khartoum."

The horse inside the stall was, even to Hagen's inexperienced eyes, a beautiful animal. Khartoum's skin was jet black except for a diamond-shaped white patch on his huge

forehead. The great brown eyes glinted like golden apples, the black skin over the taut body was silk. Woltz said with childish pride, "The greatest racehorse in the world. I bought him in England last year for six hundred grand. I bet even the Russian Czars never paid that much for a single horse. But I'm not going to race him, I'm going to put him to stud. I'm going to build the greatest racing stable this country has ever known." He stroked the horse's mane and called out softly, "Khartoum, Khartoum." There was real love in his voice and the animal responded. Woltz said to Hagen, "I'm a good horseman, you know, and the first time I ever rode I was fifty years old." He laughed. "Maybe one of my grandmothers in Russia got raped by a Cossack and I got his blood." He tickled Khartoum's belly and said with sincere admiration, "Look at that cock on him. I should have such a cock."

They went back to the mansion to have dinner. It was served by three waiters under the command of a butler, the table linen and ware were all gold thread and silver, but Hagen found the food mediocre. Woltz obviously lived alone, and just as obviously was not a man who cared about food. Hagen waited until they had both lit up huge Havana cigars before he asked Woltz, "Does Johnny get it or not?"

"I can't," Woltz said. "I can't put Johnny into that picture even if I wanted to. The contracts are all signed for all the performers and the cameras roll next week. There's no way I can swing it."

Hagen said impatiently, "Mr. Woltz, the big advantage of dealing with a man at the top is that such an excuse is not valid. You can do anything you want to do." He puffed on his cigar. "Don't you believe my client can keep his promises?"

Woltz said dryly, "I believe that I'm going to have labor trouble. Goff called me up on that, the son of a bitch, and the way he talked to me you'd never guess I pay him a hundred grand a year under the table. And I believe you can get that fag he-man star of mine off heroin. But I don't care about that and I can finance my own pictures. Because I hate that bastard Fontane. Tell your boss this is one favor I can't give but that he should try me again on anything else. Anything at all."

Hagen thought, you sneaky bastard, then why the hell did you bring me all the way out here? The producer had something on his mind. Hagen said coldly, "I don't think you understand the situation. Mr. Corleone is Johnny Fontane's godfather. That is a very close, a very sacred religious relationship." Woltz bowed his head in respect at this reference to religion. Hagen went on. "Italians have a little joke, that the world is so hard a man must have two fathers to look after him, and that's why they have godfathers. Since Johnny's father died, Mr. Corleone feels his responsibility even more deeply. As for trying you again, Mr. Corleone is much too sensitive. He never asks a second favor where he has been refused the first."

Woltz shrugged. "I'm sorry. The answer is still no. But since you're here, what will it cost me to have that labor trouble cleared up? In cash. Right now."

That solved one puzzle for Hagen. Why Woltz was putting in so much time on him when he had already decided not to give Johnny the part. And that could not be changed at this

meeting. Woltz felt secure; he was not afraid of the power of Don Corleone. And certainly Woltz with his national political connections, his acquaintanceship with the FBI chief, his huge personal fortune and his absolute power in the film industry, could not feel threatened by Don Corleone. To any intelligent man, even to Hagen, it seemed that Woltz had correctly assessed his position. He was impregnable to the Don if he was willing to take the losses the labor struggle would cost. There was only one thing wrong with the whole equation. Don Corleone had promised his godson he would get the part and Don Corleone had never, to Hagen's knowledge, broken his word in such matters.

Hagen said quietly, "You are deliberately misunderstanding me. You are trying to make me an accomplice to extortion. Mr. Corleone promises only to speak in your favor on this labor trouble as a matter of friendship in return for your speaking in behalf of his client. A friendly exchange of influence, nothing more. But I can see you don't take me seriously. Personally, I think that is a mistake."

Woltz, as if he had been waiting for such a moment, let himself get angry. "I understood perfectly," he said. "That's the Mafia style, isn't is? All olive oil and sweet talk when what you're really doing is making threats. So let me lay it on the line. Johnny Fonfane will never get that part and he's perfect for it. It would make him a great star. But he never will be because I hate that pinko punk and I'm going to run him out of the movies. And I'll tell you why. He ruined one of my most valuable protégées. For five years I had this girl under training, singing, dancing, acting lessons, I spent hundreds of thousands of dollars. I was going to make her a star. I'll be even more frank, just to show you that I'm not a hard-hearted man, that it wasn't all dollars and cents. That girl was beautiful and she was the greatest piece of ass I've ever had and I've had them all over the world. She could suck you out like a water pump. Then Johnny comes along with that olive-oil voice and guinea charm and she runs off. She threw it all away just to make me ridiculous. A man in my position, Mr. Hagen, can't afford to look ridiculous. I have to pay Johnny off."

For the first time, Woltz succeeded in astounding Hagen. He found it inconceivable that a grown man of substance would let such trivialities affect his judgment in an affair of business, and one of such importance. In Hagen's world, the Corleones' world, the physical beauty, the sexual power of women, carried not the slightest weight in worldly matters. It was a private affair, except, of course, in matters of marriage and family disgrace. Hagen decided to make one last try.

"You are absolutely right, Mr. Woltz," Hagen said. "But are your grievances that major? I don't think you've understood how important this very small favor is to my client. Mr. Corleone held the infant Johnny in his arms when he was baptized. When Johnny's father died, Mr. Corleone assumed the duties of parenthood, indeed he is called 'Godfather' by many, many people who wish to show their respect and gratitude for the help he has given them. Mr. Corleone never lets his friends down."

Woltz stood up abruptly. "I've listened to about enough. Thugs don't give me orders, I give them orders. If I pick up this phone, you'll spend the night in jail. And if that Mafia goombah tries any rough stuff, he'll find out I'm not a band leader. Yeah, I heard that story too. Listen, your Mr. Corleone will never know what hit him. Even if I have to use my influence at the

White House."

The stupid, stupid son of a bitch. How the hell did he get to be a *pezzonovante*, Hagen wondered. Advisor to the President, head of the biggest movie studio in the world. Definitely the Don should get into the movie business. And the guy was taking his words at their sentimental face value. He was not getting the message.

"Thank you for the dinner and a pleasant evening," Hagen said. "Could you give me transportation to the airport? I don't think I'll spend the night." He smiled coldly at Woltz. "Mr. Corleone is a man who insists on hearing bad news at once."

While waiting in the floodlit colonnade of the mansion for his car, Hagen saw two women about to enter a long limousine already parked in the driveway. They were the beautiful twelve-year-old blond girl and her mother he had seen in Woltz's office that morning. But now the girl's exquisitely cut mouth seemed to have smeared into a thick, pink mass. Her sea-blue eyes were filmed over and when she walked down the steps toward the open car her long legs tottered like a crippled foal's. Her mother supported the child, helping her into the car, hissing commands into her ear. The mother's head turned for a quick furtive look at Hagen and he saw in her eyes a burning, hawklike triumph. Then she too disappeared into the limousine.

So that was why he hadn't got the plane ride from Los Angeles, Hagen thought. The girl and her mother had made the trip with the movie producer. That had given Woltz enough time to relax before dinner and do the job on the little kid. And Johnny wanted to live in this world? Good luck to him, and good luck to Woltz.

**************

Paulie Gatto hated quickie jobs, especially when they involved violence. He liked to plan things ahead. And something like tonight, even though it was punk stuff, could turn into serious business if somebody made a mistake. Now, sipping his beer, he glanced around, checking how the two young punks were making out with the two little tramps at the bar.

Paulie Gatto knew everything there was to know about those two punks. Their names were Jerry Wagner and Kevin Moonan. They were both about twenty years old, goodlooking, brown-haired, tall, well-built. Both were due to go back to college out of town in two weeks, both had fathers with political influence and this, with their college student classification, had so far kept them out of the draft. They were both also under suspended sentences for assaulting the daughter of Amerigo Bonasera. The lousy bastards, Paulie Gatto thought. Draft dodging, violating their probation by drinking in a bar after midnight, chasing floozies. Young punks. Paulie Gatto had been deferred from the draft himself because his doctor had furnished the draft board with documents showing that this patient, male, white, aged twenty-six, unmarried, had received electrical shock treatments for a mental condition. All false, of course, but Paulie Gatto felt that he had earned his draft exemption. It had been arranged by Clemenza after Gatto had "made his bones" in the family business.

It was Clemenza who had told him that this job must be rushed through, before the boys

went to college. Why the hell did it have to be done in New York, Gatto wondered. Clemenza was always giving extra orders instead of just giving out the job. Now if those two little tramps walked out with the punks it would be another night wasted.

He could hear one of the girls laughing and saying, "Are you crazy, Jerry? I'm not going in any car with you. I don't want to wind up in the hospital like that other poor girl." Her voice was spitefully rich with satisfaction. That was enough for Gatto. He finished up his beer and walked out into the dark street. Perfect. It was after midnight. There was only one other bar that showed light. The rest of the stores were closed. The precinct patrol car had been taken care of by Clemenza. They wouldn't be around that way until they got a radio call and then they'd come slow.

He leaned against the four-door Chevy sedan. In the back seat two men were sitting, almost invisible, although they were very big men. Paulie said, "Take them when they come out."

He still thought it had all been set up too fast. Clemenza had given him copies of the police mug shots of the two punks, the dope on where the punks went drinking every night to pick up bar girls. Paulie had recruited two of the strong-arms in the family and fingered the punks for them. He had also given them their instructions. No blows on the top or the back of the head, there was to be no accidental fatality. Other than that they could go as far as they liked. He had given them only one warning: "If those punks get out of the hospital in less than a month, you guys go back to driving trucks."

The two big men were getting out of the car. They were both ex-boxers who had never made it past the small clubs and had been fixed up by Sonny Corleone with a little loan-shark action so that they could make a decent living. They were, naturally, anxious to show their gratitude.

When Jerry Wagner and Kevin Moonan came out of the bar they were perfect setups. The bar girl's taunts had left their adolescent vanity prickly. Paulie Gatto, leaning against the fender of his car, called out to them with a teasing laugh, "Hey, Casanova, those broads really brushed you off."

The two young men turned on him with delight. Paulie Gatto looked like a perfect outlet for their humiliation. Ferret-faced, short, slightly built and a wise guy in the bargain. They pounced on him eagerly and immediately found their arms pinned by two men grabbing them from behind. At the same moment Paulie Gatto had slipped onto his right hand a specially made set of brass knuckles studded with one-sixteenth-inch iron spikes. His timing was good, he worked out in the gym three times a week. He smashed the punk named Wagner right on the nose. The man holding Wagner lifted him up off the ground and Paulie swung his arm, uppercutting into the perfectly positioned groin. Wagner went limp and the big man dropped him. This had taken no more than six seconds.

Now both of them turned their attention to Kevin Moonan, who was trying to shout. The man holding him from behind did so easily with one huge muscled arm. The other hand he put around Moonan's throat to cut off any sound.

Paulie Gatto jumped into the car and started the motor. The two big men were beating Moonan to jelly. They did so with frightening deliberation, as if they had all the time in the world. They did not throw punches in flurries but in timed, slow-motion sequences that carried the full weight of their massive bodies. Each blow landed with a *splat* of flesh splitting open. Gatto got a glimpse of Moonan's face. It was unrecognizable. The two men left Moonan lying on the sidewalk and turned their attention to Wagner. Wagner was trying to get to his feet and he started to scream for help. Someone came out of the bar and the two men had to work faster now. They clubbed Wagner to his knees. One of the men took his arm and twisted it, then kicked him in the spine. There was a cracking sound and Wagner's scream of agony brought windows open all along the street. The two men worked very quickly. One of them held Wagner up by using his two hands around Wagner's head like a vise. The other man smashed his huge fist into the fixed target. There were more people coming out of the bar but none tried to interfere. Paulie Gatto yelled, "Come on, enough." The two big men jumped into the car and Paulie gunned it away, Somebody would describe the car and read the license plates but it didn't matter. It was a stolen California plate and there were one hundred thousand black Chevy sedans in New York City.

# Chapter 02

Tom Hagen went to his law office in the city on Thursday morning. He planned to catch up on his paper work so as to have everything cleared away for the meeting with Virgil Sollozzo on Friday. A meeting of such importance that he had asked the Don for a full evening of talk to prepare for the proposition they knew Sollozzo would offer the family business. Hagen wanted to have all little details cleared away so that he could go to that preparatory meeting with an unencumbered mind.

The Don had not seemed surprised when Hagen returned from California late Tuesday evening and told him the results of the negotiations with Woltz. He had made Hagen go over every detail and grimaced with distaste when Hagen told about the beautiful little girl and her mother. He had murmured "*infamita,*" his strongest disapproval. He had asked Hagen one final question. "Does this man have real balls?"

Hagen considered exactly what the Don meant by this question. Over the years he had learned that the Don's values were so different from those of most people that his words also could have a different meaning. Did Woltz have character? Did he have a strong will? He most certainly did, but that was not what the Don was asking. Did the movie producer have the courage not to be bluffed? Did he have the willingness to suffer heavy financial loss delay on his movies would mean, the scandal of his big star exposed as a user of heroin? Again the answer was yes. But again this was not what the Don meant. Finally Hagen translated the question properly in his mind. Did Jack Woltz have the balls to risk everything, to run the chance of losing *all* on a matter of principle, on a matter of honor; for revenge?

Hagen smiled. He did it rarely but now he could not resist jesting with the Don. "You're asking if he is a Sicilian." The Don nodded his head pleasantly, acknowledging the flattering witticism and its truth. "No," Hagen said.

That had been all. The Don had pondered the question until the next day. On Wednesday afternoon he had called Hagen to his home and given him his instructions. The instructions had consumed the rest of Hagen's working day and left him dazed with admiration. There was no question in his mind that the Don had solved the problem, that Woltz would call him this morning with the news that Johnny Fontane had the starring part in his new war movie.

At that moment the phone did ring but it was Amerigo Bonasera. The undertaker's voice was trembling with gratitude. He wanted Hagen to convey to the Don his undying friendship. The Don had only to call on him. He, Amerigo Bonasera, would lay down his life for the blessed Godfather. Hagen assured him that the Don would be told.

The *Daily News* had carried a middle-page spread of Jerry Wagner and Kevin Moonan lying in the street. The photos were expertly gruesome, they seemed to be pulps of human beings. Miraculously, said the *News*, they were both still alive though they would both be in the hospital for months and would require plastic surgery. Hagen made a note to tell Clemenza that something should be done for Paulie Gatto. He seemed to know his job.

Hagen worked quickly and efficiently for the next three hours consolidating earning reports from the Don's real estate company, his olive oil importing business and his construction firm. None of them were doing well but with the war over they should all become rich producers. He had almost forgotten the Johnny Fontane problem when his secretary told him California was calling. He felt a little thrill of anticipation as he picked up the phone and said, "Hagen here."

The voice that came over the phone was unrecognizable with hate and passion. "You fucking bastard," Woltz screamed. "I'll have you all in jail for a hundred years. I'll spend every penny I have to get you. I'll get that Johnny Fontane's balls cut off, do you hear me, you guinea fuck?"

Hagen said kindly, "I'm German-Irish." There was a long pause and then a click of the phone being hung up. Hagen smiled. Not once had Woltz uttered a threat against Don Corleone himself. Genius had its rewards.

**************

Jack Woltz always slept alone. He had a bed big enough for ten people and a bedroom large enough for a movie ballroom scene, but he had slept alone since the death of his first wife ten years before. This did not mean he no longer used women. He was physically a vigorous man despite his age, but he could be aroused now only by very young girls and had learned that a few hours in the evening were all the youth his body and his patience could tolerate.

On this Thursday morning, for some reason, he awoke early. The light of dawn made his huge bedroom as misty as a foggy meadowland. Far down at the foot of his bed was a familiar shape and Woltz struggled up on his elbows to get a clearer look. It had the shape of a horse's head. Still groggy, Woltz reached and flicked on the night table lamp.

The shock of what he saw made him physically ill. It seemed as if a great sledgehammer had struck him on the chest, his heartbeat jumped erratically and he became nauseous. His vomit spluttered on the thick bear rug.

Severed from its body, the black silky head of the great horse Khartoum was stuck fast in a thick cake of blood. White, reedy tendons showed. Froth covered the muzzle and those apple-sized eyes that had glinted like gold, were mottled the color of rotting fruit with dead, hemorrhaged blood. Woltz was struck by a purely animal terror and out of that terror he screamed for his servants and out of that terror he called Hagen to make his uncontrolled threats. His maniacal raving alarmed the butler, who called Woltz's personal physician and his second in command at the studio. But Woltz regained his senses before they arrived.

He had been profoundly shocked. What kind of man could destroy an animal worth six hundred thousand dollars? Without a word of warning. Without any negotiation to have the act, its order, countermanded. The ruthlessness, the sheer disregard for any values, implied a man who considered himself completely his own law, even his own God. And a man who backed up this kind of will with the power and cunning that held his own stable security force of no account. For by this time Woltz had learned that the horse's body had obviously been heavily drugged before someone leisurely hacked the huge triangular head off with an ax. The men on night duty claimed that they had heard nothing. To Woltz this seemed impossible. They could be made to talk. They had been bought off and they could be made to tell who had done the buying.

Woltz was not a stupid man, be was merely a supremely egotistical one. He had mistaken the power he wielded in his world to be more potent than the power of Don Corleone. He had merely needed some proof that this was not true. He understood this message. That despite all his wealth, despite all his contacts with the President of the United States, despite all his claims of friendship with the director of the FBI, an obscure importer of Italian olive oil would have him killed. Would actually have him killed! Because he wouldn't give Johnny Fontane a movie part he wanted. It was incredible. People didn't have any right to act that way. There couldn't be any kind of world if people acted that way. It was insane. It meant you couldn't do what you wanted with your own money, with the companies you owned, the power you had to give orders. It was ten times worse than communism. It had to be smashed. It must never be allowed.

Woltz let the doctor give him a very mild sedation. It helped him calm down again and to think sensibly. What really shocked him was the casualness with which this man Corleone had ordered the destruction of a world-famous horse worth six hundred thousand dollars. Six hundred thousand dollars! And that was just for openers. Woltz shuddered. He thought of this life he had built up. He was rich. He could have the most beautiful women in the world by cooking his finger and promising a contract. He was received by kings and queens. He lived a life as perfect as money and power could make it. It was crazy to risk all this because of a whim. Maybe he could get to Corleone. What was the legal penalty for killing a racehorse? He laughed wildly and his doctor and servants watched him with nervous anxiety. Another thought occurred to him. He would be the laughingstock of California merely because someone had contemptuously defied his power in such arrogant fashion. That decided him. That and the thought that maybe, maybe they wouldn't kill him. That they had

something much more clever and painful in reserve.

Woltz gave the necessary orders. His personal confidential staff swung into action. The servants and the doctor were sworn to secrecy on pain of incurring the studio's and Woltz's undying enmity. Word was given to the press that the racehorse Khartoum had died of an illness contracted during his shipment from England. Orders were given to bury the remains in a secret place on the estate.

Six hours later Johnny Fontane received a phone call from the executive producer of the film telling him to report for work the following Monday.

**************

That evening, Hagen went to the Don's house to prepare him for the important meeting the next day with Virgil Sollozzo. The Don had summoned his eldest son to attend, and Sonny Corleone, his heavy Cupid-shaped face drawn with fatigue, was sipping at a glass of water. He must still be humping that maid of honor, Hagen thought. Another worry.

Don Corleone settled into an armchair puffing his Di Nobili cigar. Hagen kept a box of them in his room. He had tried to get the Don to switch to Havanas but the Don claimed they hurt his throat.

"Do we know everything necessary for us to know?" the Don asked.

Hagen opened the folder that held his notes. The notes were in no way incriminating, merely cryptic reminders to make sure he touched on every important detail. "Sollozzo is coming to us for help," Hagen said. "He will ask the family to put up at least a million dollars and to promise some sort of immunity from the law. For that we get a piece of the action, nobody knows how much. Sollozzo is vouched for by the Tattaglia family and they may have a piece of the action. The action is narcotics. Sollozzo has the contacts in Turkey, where they grow the poppy. From there he ships to Sicily. No trouble. In Sicily he has the plant to process into heroin. He has safety-valve operations to bring it down to morphine and bring it up to heroin if necessary. But it would seem that the processing plant in Sicily is protected in every way. The only hitch is bringing it into this country, and then distribution. Also initial capital. A million dollars cash doesn't grow on trees." Hagen saw Don Corleone grimace.The old man hated unnecessary flourishes in business matters. He went on hastily.

"They call Sollozzo the Turk. Two reasons. He's spent a lot of time in Turkey and is supposed to have a Turkish wife and kids. Second. He's supposed to be very quick with the knife, or was, when he was young. Only in matters of business, though, and with some sort of reasonable complaint. A very competent man and his own boss. He has a record, he's done two terms in prison, one in Italy, one in the United States, and he's known to the authorities as a narcotics man. This could be a plus for us. It means that he'll never get immunity to testify, since he's considered the top and, of course, because of his record. Also he has an American wife and three children and he is a good family man. He'll stand still for any rap as long as he knows that they will be well taken care of for living money."

The Don puffed on his cigar and said, "Santino, what do you think?"

Hagen knew what Sonny would say. Sonny was chafing at being under the Don's thumb. He wanted a big operation of his own. Something like this would be perfect.

Sonny took a long slug of scotch. "There's a lot of money it that white powder," he said. "But it could be dangerous. Some people could wind up in jail for twenty years. I'd say that if we kept out of the operations end, just stuck to protection and financing, it might be a good idea."

Hagen looked at Sonny approvingly. He had played his cards well. He had stuck to the obvious, much the best course for him.

The Don puffed on his cigar. "And you, Tom, what do you think?"

Hagen composed himself to be absolutely honest. He had already come to the conclusion that the Don would refuse Sollozzo's proposition. But what was worse, Hagen was convinced that for one of the few times in his experience, the Don had not thought things through. He was not looking far enough ahead.

"Go ahead, Tom," the Don said encouragingly. "Not even a Sicilian *Consigliere* always agrees with the boss." They all laughed.

"I think you should say yes," Hagen said. "You know all the obvious reasons. But the most important one is this. There is more money potential in narcotics than in any other business. If we don't get into it, somebody else will, maybe the Tattaglia family. With the revenue they earn they can amass more and more police and political power. Their family will become stronger than ours. Eventually they will come after us to take away what we have. It's just like countries. If they arm, we have to arm. If they become stronger economically, they become a threat to us. Now we have the gambling and we have the unions and right now they are the best things to have. But I think narcotics is the coming thing. I think we have to have a piece of that action or we risk everything we have. Not now, but maybe ten years from now."

The Don seemed enormously impressed. He puffed on his cigar and murmured, "That's the most important thing of course." He sighed and got to his feet. "What time do I have to meet this infidel tomorrow?"

Hagen said hopefully, "He'll be here at ten in the morning." Maybe the Don would go for it.

"I'll want you both here with me," the Don said. He rose, stretching, and took his son by the arm. "Santino, get some sleep tonight, you look like the devil himself. Take care of yourself, you won't be young forever."

Sonny, encouraged by this sign of fatherly concern, asked the question Hagen did not dare to ask. "Pop, what's your answer going to be?"

Don Corleone smiled. "How do I know until I hear the percentages and other details? Besides I have to have time to think over the advice given here tonight. After all, I'm not a man who does things rashly." As he went out the door he said casually to Hagen, "Do you have in your notes that the Turk made his living from prostitution before the war? As the Tattaglia family does now. Write that down before you forget." There was just a touch of derision in the Don's voice and Hagen flushed. He had deliberately not mentioned it, legitimately so since it really had no bearing, but he had feared it might prejudice the Don's decision. He was notoriously straitlaced in matters of sex.

**************

Virgil "the Turk" Sollozzo was a powerfully built, medium-sized man of dark complexion who could have been taken for a true Turk. He had a scimitar of a nose and cruel black eyes. He also had an impressive dignity.

Sonny Corleone met him at the door and brought him into the office where Hagen and the Don waited. Hagen thought he had never seen a more dangerous-looking man except for Luca Brasi.

There were polite handshakings all around. If the Don ever asks me if this man has balls, I would have to answer yes, Hagen thought. He had never seen such force in one man, not even the Don. In fact the Don appeared at his worst. He was being a little too simple, a little too peasantlike in his greeting.

Sollozzo came to the point immediately. The business was narcotic. Everything was set up. Certain poppy fields in Turkey had pledged him certain amounts every year. He had a protected plant in France to convert into morphine. He had an absolutely secure plant in Sicily to process into heroin. Smuggling into both countries was as positively safe as such matters could be. Entry into the United States would entail about five percent losses since the FBI itself was incorruptible, as they both knew. But the profits would be enormous, the risk nonexistent.

"Then why do you come to me?" the Don asked politely. "How have I deserved your generosity?"

Sollozzo's dark face remained impassive. "I need two million dollars cash," he said. "Equally important, I need a man who has powerful friends in the important places. Some of my couriers will be caught over the years. That is inevitable. They will all have clean records, that I promise. So it will be logical for judges to give light sentences. I need a friend who can guarantee that when my people get in trouble they won't spend more than a year or two in jail. Then they won't talk. But if they get ten and twenty years, who knows? In this world there are many weak individuals. They may talk, they may jeopardize more important people. Legal protection is a must. I hear, Don Corleone, that you have as many judges in your pocket as a bootblack has pieces of silver."

Don Corleone didn't bother to acknowledge the compliment. "What percentage for my

family?" he asked.

Sollozzo's eyes gleamed. "Fifty percent." He paused and then said in a voice that was almost a caress, "In the first year your share would be three or four million dollars. Then it would go up."

Don Corleone said, "And what is the percentage of the Tattaglia family?"

For the first time Sollozzo seemed to be nervous. "They will receive something from my share. I need some help in the operations."

"So," Don Corleone said, "I receive fifty percent merely for finance and legal protection. I have no worries about operations, is that what you tell me?"

Sollozzo nodded. "If you think two million dollars in cash is 'merely finance,' I congratulate you, Don Corleone."

The Don said quietly, "I consented to see you out of my respect for the Tattaglias and because I've heard you are a serious man to be treated also with respect. I must say no to you but I must give you my reasons. The profits in your business are huge but so are the risks. Your operation, if I were part of it, could damage my other interests. It's true I have many, many friends in politics, but they would not be so friendly if my business were narcotics instead of gambling. They think gambling is something like liquor, a harmless vice, and they think narcotics a dirty business. No, don't protest. I'm telling you their thoughts, not mine. How a man makes his living is not my concern. And what I am telling you is that this business of yours is too risky. All the members of my family have lived well the last ten years, without danger, without harm. I can't endanger them or their livelihoods out of greed."

The only sign of Sollozzo's disappointment was a quick flickering of his eyes around the room, as if he hoped Hagen or Sonny would speak in his support. Then he said, "Are you worried about security for your two million?"

The Don smiled coldly. "No," he said.

Sollozzo tried again. "The Tattaglia family will guarantee your investment also."

It was then that Sonny Corleone made an unforgivable error in judgment and procedure. He said eagerly, "The Tattaglia family guarantees the return of our investment without any percentage from us?"

Hagen was horrified at this break. He saw the Don turn cold, malevolent eyes on his eldest son, who froze in uncomprehending dismay. Sollozzo's eyes flickered again but this time with satisfaction. He had discovered a chink in the Don's fortress. When the Don spoke his voice held a dismissal. "Young people are greedy," he said. "And today they have no manners. They interrupt their elders. They meddle. But I have a sentimental weakness for my children and I have spoiled them. As you see. Signor Sollozzo, my no is final. Let me say

that I myself wish you good fortune in your business. It has no conflict with my own. I'm sorry that I had to disappoint you."

Sollozzo bowed, shook the Don's hand and let Hagen take him to his car outside. There was no expression on his face when he said good-bye to Hagen.

Back in the room, Don Corleone asked Hagen, "What did you think of that man?" "He's a Sicilian," Hagen said dryly.

The Don nodded his head thoughtfully. Then he turned to his son and said gently, "Santino, never let anyone outside the family know what you are thinking. Never let them know what you have under your fingernails. I think your brain is going soft from all that comedy you play with that young girl. Stop it and pay attention to business. Now get out of my sight."

Hagen saw the surprise on Sonny's face, then anger at his father's reproach. Did he really think the Don would be ignorant of his conquest, Hagen wondered. And did he really not know what a dangerous mistake he had made this morning? If that were true, Hagen would never wish to be the *Consigliere* to the Don of Santino Corleone.

Don Corleone waited until Sonny had left the room. Then he sank back into his leather armchair and motioned brusquely for a drink. Hagen poured him a glass of anisette. The Don looked up at him. "Send Luca Brasi to see me," he said.

**************

Three months later, Hagen hurried through the paper work in his city office hoping to leave early enough for some Christmas shopping for his wife and children. He was interrupted by a phone call from a Johnny Fontane bubbling with high spirits. The picture had been shot, the rushes, whatever the hell they were, Hagen thought, were fabulous. He was sending the Don a present for Christmas that would knock his eyes out, he'd bring it himself but there were some little things to be done in the movie. He would have to stay out on the Coast. Hagen tried to conceal his impatience. Johnny Fontane's charm had always been lost on him. But his interest was aroused. "What is it?" he asked. Johnny Fontane chuckled and said, "I can't tell, that's the best part of a Christmas present." Hagen immediately lost all interest and finally managed, politely, to hang up.

Ten minutes later his secretary told him that Connie Corleone was on the phone and wanted to speak to him. Hagen sighed. As a young girl Connie had been nice, as a married woman she was a nuisance. She made complaints about her husband. She kept going home to visit her mother for two or three days. And Carlo Rizzi was turning out to be a real loser. He had been fixed up with a nice little business and was running it into the ground. He was also drinking, whoring around, gambling and beating his wife up occasionally. Connie hadn't told her family about that but she had told Hagen. He wondered what new tale of woe she had for him now.

But the Christmas spirit seemed to have cheered her up. She just wanted to ask Hagen what

her father would really like for Christmas. And Sonny and Fred and Mike. She already knew what she would get her mother. Hagen made some suggestions, all of which she rejected as silly. Finally she let him go.

When the phone rang again, Hagen threw his papers back into the basket. The hell with it. He'd leave. It never occurred to him to refuse to take the call, however. When his secretary told him it was Michael Corieone he picked up the phone with pleasure. He had always liked Mike.

"Tom," Michael Corleone said, "I'm driving down to the city with Kay tomorrow. There's something important I want to tell the old man before Christmas. Will he be home tomorrow night?"

"Sure," Hagen said. "He's not going out of town until after Christmas. Anything I can do for you?"

Michael was as closemouthed as his father. "No," he said. "I guess I'll see you Christmas, everybody is going to be out at Long Beach, right?"

"Right," Hagen said. He was amused when Mike hung up on him without any small talk.

He told his secretary to call his wife and tell her he would be home a little late but to have some supper for him. Outside the building he walked briskly downtown toward Macy's. Someone stepped in his way. To his surprise he saw it was Sollozzo.

Sollozzo took him by the arm and said quietly, "Don't be frightened. I just want to talk to you." A car parked at the curb suddenly had its door open. Sollozzo said urgently, "Get in, I want to talk to you." .

Hagen pulled his arm loose. He was still not alarmed, just irritated. "I haven't got time," he said. At that moment two men came up behind him. Hagen felt a sudden weakness in his legs. Sollozzo said softly, "Get in the car. If I wanted to kill you you'd be dead now. Trust me."

Without a shred of trust Hagen got into the car.

**************

Michael Corleone had lied to Hagen. He was already in New York, and he had called from a room in the Hotel Pennsylvania less than ten blocks away. When he hung up the phone, Kay Adams put out her cigarette and said, "Mike, what a good fibber you are."

Michael sat down beside her on the bed. "All for you, honey; if I told my family we were in town we'd have to go there right away. Then we couldn't go out to dinner, we couldn't go to the theater, and we couldn't sleep together tonight. Not in my father's house, not when we're not married." He put his arms around her and kissed her gently on the lips. Her mouth was sweet and he gently pulled her down on the bed. She closed her eyes, waiting for him to

make love to her and Michael felt an enormous happiness. He had spent the war years fighting in the Pacific, and on those bloody islands he had dreamed of a girl like Kay Adams. Of a beauty like hers. A fair and fragile body, milky-skinned and electrified by passion. She opened her eyes and then pulled his head down to kiss him. They made love until it was time for dinner and the theater.

After dinner they walked past the brightly lit department stores full of holiday shoppers and Michael said to her, "What shall I get you for Christmas?"

She pressed against him. "Just you," she said. "Do you think your father will approve of me?"

Michael said gently, "That's not really the question. Will your parents approve of me?" Kay shrugged. "I don't care," she said.

Michael said, "I even thought of changing my name, legally, but if something happened, that wouldn't really help. You sure you want to be a Corleone?" He said it only half-jokingly.

"Yes," she said without smiling. They pressed against each other. They had decided to get married during Christmas week, a quiet civil ceremony at City Hall with just two friends as witnesses. But Michael had insisted he must tell his father. He had explained that his father would not object in any way as long as it was not done in secrecy. Kay was doubtful. She said she could not tell her parents until after the marriage. "Of course they'll think I'm pregnant," she said. Michael grinned. "So will my parents," he said.

What neither of them mentioned was the fact that Michael would have to cut his close ties with his family. They both understood that Michael had already done so to some extent and yet they both felt guilty about this fact. They planned to finish college, seeing each other weekends and living together during summer vacations. It seemed like a happy life.

The play was a musical called *Carousel* and its sentimental story of a braggart thief made them smile at each other with amusement. When they came out of the theater it had turned cold. Kay snuggled up to him and said, "After we're married, will you beat me and then steal a star for a present?"

Michael laughed. "I'm going to be a mathematics professor," he said. Then he asked, "Do you want something to eat before we go to the hotel?"

Kay shook her head. She looked up at him meaningfully. As always he was touched by her eagerness to make love. He smiled down at her, and they kissed in the cold street. Michael felt hungry, and he decided to order sandwiches sent up to the room.

In the hotel lobby Michael pushed Kay toward the newsstand and said, "Get the papers while I get the key." He had to wait in a small line; the hotel was still short of help despite the end of the war. Michael got his room key and looked around impatiently for Kay. She

was standing by the newsstand, staring down at a newspaper she held in her hand. He walked toward her. She looked up at him. Her eyes were filled with tears. "Oh, Mike," she said, "oh, Mike." He took the paper from her hands. The first thing he saw was a photo of his father lying in the street, his head in a pool of blood. A man was sitting on the curb weeping like a child. It was his brother Freddie. Michael Corleone felt his body turning to ice. There was no grief, no fear, just cold rage. He said to Kay, "Go up to the room." But he had to take her by the arm and lead her into the elevator. They rode up together in silence. In their room, Michael sat down on the bed and opened the paper. The headlines said, VITO CORLEONE SHOT. ALLEGED RACKET CHIEF CRITICALLY WOUNDED. OPERATED ON UNDER HEAVY POLICE GUARD. BLOODY MOB WAR FEARED.

Michael felt the weakness in his legs. He said to Kay, "He's not dead, the bastards didn't kill him." He read the story again. His father had been shot at five in the afternoon. That meant that while he had been making love to Kay, having dinner, enjoying the theater, his father was near death. Michael felt sick with guilt.

Kay said, "Shall we go down to the hospital now?"

Michael shook his head. "Let me call the house first. The people who did this are crazy and now that the old man's still alive they'll be desperate. Who the hell knows what they'll pull next."

Both phones in the Long Beach house were busy and it was almost twenty minutes before Michael could get through. He heard Sonny's voice saying, "Yeah."

"Sonny, it's me," Michael said.

He could hear the relief in Sonny's voice. "Jesus, kid, you had us worried. Where the hell are you? I've sent people to that hick town of yours to see what happened."

"How's the old man?" Michael said. "How bad is he hurt?"

"Pretty bad," Sonny said. "They shot him five times. But he's tough." Sonny's voice was proud. "The doctors said he'll pull through. Listen, kid, I'm busy, I can't talk, where are you?"

"In New York," Michael said. "Didn't Tom tell you I was coming down?"

Sonny's voice dropped a little. "They've snatched Tom. That's why I was worried about you. His wife is here. She don't know and neither do the cops. I don't want them to know. The bastards who pulled this must be crazy. I want you to get out here right away and keep your mouth shut. OK?"

"OK," Mike said, "do you know who did it?"

"Sure," Sonny said. "And as soon as Luca Brasi checks in they're gonna be dead meat. We still have all the horses."

"I'll be out in a hour," Mike said. "In a cab." He hung up. The papers had been on the streets for over three hours. There must have been radio news reports. It was almost impossible that Luca hadn't heard the news. Thoughtfully Michael pondered the question. Where was Luca Brasi? It was the same question that Hagen was asking himself at that moment. It was the same question that was worrying Sonny Corleone out in Long Beach.

**************

At a quarter to five that afternoon, Don Corleone had finished checking the papers the office manager of his olive oil company had prepared for him. He put on his jacket and rapped his knuckles on his son Freddie's head to make him take his nose out of the afternoon newspaper. "Tell Gatto to get the car from the lot," he said. "I'll be ready to go home in a few minutes."

Freddie grunted. "I'll have to get it myself. Paulie called in sick this morning. Got a cold again."

Don Corleone looked thoughtful for a moment. "That's the third time this month. I think maybe you'd better get a healthier fellow for this job. Tell Tom."

Fred protested. "Paulie's a good kid. If he says he's sick, he's sick. I don't mind getting the car." He left the office. Don Corleone watched out the window as his son crossed Ninth Avenue to the parking lot. He stopped to call Hagen's office but there was no answer. He called the house at Long Beach but again there was no answer. Irritated, he looked out the window. His car was parked at the curb in front of his building. Freddie was leaning against the fender, arms folded, watching the throng of Christmas shoppers. Don Corleone put on his jacket. The office manager helped him with his overcoat. Don Corleone grunted his thanks and went out the door and started down the two flights of steps.

Out in the street the early winter light was failing. Freddie leaned casually against the fender of the heavy Buick. When he saw his father come out of the building Freddie went out into the street to the driver's side of the car and got in. Don Corleone was about to get in on the sidewalk side of the car when he hesitated and then turned back to the long open fruit stand near the corner. This had been his habit lately, he loved the big out-of-season fruits, yellow peaches and oranges, that glowed in their green boxes. The proprietor sprang to serve him. Don Corleone did not handle the fruit. He pointed. The fruit man disputed his decisions only once, to show him that one of his choices had a rotten underside. Don Corleone took the paper bag in his left hand and paid the man with a five-dollar bill. He took his change and, as he turned to go back to the waiting car, two men stepped from around the corner. Don Corleone knew immediately what was to happen.

The two men wore black overcoats and black hats pulled low to prevent identification by witnesses. They had not expected Don Corleone's alert reaction. He dropped the bag of fruit and darted toward the parked car with startling quickness for a man of his bulk. At the same time he shouted, "Fredo, Fredo." It was only then that the two men drew their guns and fired.

The first bullet caught Don Corleone in the back. He felt the hammer shock of its impact but made his body move toward the car. The next two bullets hit him in the buttocks and sent him sprawling in the middle of the street. Meanwhile the two gunmen, careful not to slip on the rolling fruit, started to follow in order to finish him off. At that moment, perhaps no more than five seconds after the Don's call to his son, Frederico Corleone appeared out of his car, looming over it. The gunmen fired two more hasty shots at the Don lying in the gutter. One hit him in the fleshy part of his arm and the second hit him in the calf of his right leg. Though these wounds were the least serious they bled profusely, forming small pools of blood beside his body. But by this time Don Corleone had lost consciousness.

Freddie had heard his father shout, calling him by his childhood name, and then he had heard the first two loud reports. By the time he got out of the car he was in shock, he had not even drawn his gun. The two assassins could easily have shot him down. But they too panicked. They must have known the son was armed, and besides too much time had passed. They disappeared around the corner, leaving Freddie alone in the street with his father's bleeding body. Many of the people thronging the avenue had flung themselves into doorways or on the ground, others had huddled together in small groups.

Freddie still had not drawn his weapon. He seemed stunned. He stared down at his father's body lying face down on the tarred street, lying now in what seemed to him a blackish lake of blood. Freddie went into physical shock. People eddied out again and someone, seeing him start to sag, led him to the curbstone and made him sit down on it. A crowd gathered around Don Corleone's body, a circle that shattered when the first police car sirened a path through them. Directly behind the police was the *Daily News* radio car and even before it stopped a photographer jumped out to snap pictures of the bleeding Don Corleone. A few moments later an ambulance arrived. The photographer turned his attention to Freddie Corleone, who was now weeping openly, and this was a curiously comical sight, because of his tough, Cupid-featured face, heavy nose and thick mouth smeared with snot. Detectives were spreading through the crowd and more police cars were coming up. One detective knelt beside Freddie, questioning him, but Freddie was too deep in shock to answer. The detective reached inside Freddie's coat and lifted his wallet. He looked at the identification inside and whistled to his partner. In just a few seconds Freddie had been cut off from the crowd by a flock of plainclothesmen. The first detective found Freddie's gun in its shoulder holster and took it. Then they lifted Freddie off his feet and shoved him into an unmarked car. As that car pulled away it was followed by the *Daily News* radio car. The photographer was still snapping pictures of everybody and everything.

**************

In the half hour after the shooting of his father, Sonny Corleone received five phone calls in rapid succession. The first was from Detective John Phillips, who was on the family payroll and had been in the lead car of plainclothesmen at the scene of the shooting. The first thing he said to Sonny over the phone was, "Do you recognize my voice?"

"Yeah," Sonny said. He was fresh from a nap, called to the phone by his wife.

Phillips said quickly without preamble, "Somebody shot your father outside his place.

Fifteen minutes ago. He's alive but hurt bad. They've taken him to French Hospital. They got your brother Freddie down at the Chelsea precinct. You better get him a doctor when they turn him loose. I'm going down to the hospital now to help question your old man, if he can talk. I'll keep you posted."

Across the table, Sonny's wife Sandra noticed that her husband's face had gone red with flushing blood. His eyes were glazed over. She whispered, "What's the matter?" He waved at her impatiently to shut up, swung his body away so that his back was toward her and said into the phone, "You sure he's alive?"

"Yeah, I'm sure," the detective said. "A lot of blood but I think maybe he's not as bad as he looks."

"Thanks," Sonny said. "Be home tomorrow morning eight sharp. You got a grand coming."

Sonny cradled the phone. He forced himself to sit still. He knew that his greatest weakness was his anger and this was one time when anger could be fatal. The first thing to do was get Tom Hagen. But before he could pick up the phone, it rang. The call was from the bookmaker licensed by the Family to operate in the district of the Don's office. The bookmaker had called to tell him that the Don had been killed, shot dead in the street. After a few questions to make sure that the bookmaker's informant had not been close to the body, Sonny dismissed the information as incorrect. Phillips' dope would be more accurate. The phone rang almost immediately a third time. It was a reporter from the *Daily News*. As soon as he identified himself, Sonny Corleone hung up.

He dialed Hagen's house and asked Hagen's wife, "Did Tom come home yet?" She said, "No," that he was not due for another twenty minutes but she expected him home for supper. "Have him call me," Sonny said.

He tried to think things out. He tried to imagine how his father would react in a like situation. He had known immediately that this was an attack by Sollozzo, but Sollozzo would never have dared to eliminate so high-ranking a leader as the Don unless he was backed by other powerful people. The phone, ringing for the fourth time, interrupted his thoughts. The voice on the other end was very soft, very gentle. "Santino Corleone?" it asked.

"Yeah," Sonny said.

"We have Tom Hagen," the voice said. "In about three hours he'll be released with our proposition. Don't do anything rash until you've heard what he has to say. You can only cause a lot of trouble. What's done is done. Everybody has to be sensible now. Don't lose that famous temper of yours." The voice was slightly mocking. Sonny couldn't be sure, but it sounded like Sollozzo. He made his voice sound muted, depressed. "I'll wait," he said. He heard the receiver on the other end click. He looked at his heavy gold-banded wristwatch and noted the exact time of the call and jotted it down on the tablecloth.

He sat at the kitchen table, frowning. His wife asked, "Sonny, what is it?" He told her calmly, "They shot the old man." When he saw the shock on her face he said roughly, "Don't worry; he's not dead. And nothing else is going to happen." He did not tell her about Hagen. And then the phone rang for the fifth time.

It was Clemenza. The fat man's voice came wheezing over the phone in gruntlike gasps. "You hear about your father?" he asked.

"Yeah." Sonny said. "But he's not dead." There was a long pause over the phone and then Clemenza's voice came packed with emotion, "Thank God, thank God." Then anxiously, "You sure? I got word he was dead in the street."

"He's alive," Sonny said. He was listening intently to every intonation in Clemenza's voice. The emotion had seemed genuine but it was part of the fat man's profession to be a good actor.

"You'll have to carry the ball, Sonny," Clemenza said "What do you want me to do?" "Get over to my father's house," Sonny said. "Bring Paulie Gatto."

"That's all?" Clemenza asked. "Don't you want me to send some people to the hospital and your place?"

"No, I just want you and Paulie Gatto," Sonny said. There was a long pause. Clemenza was getting the message. To make it a little more natural, Sonny asked, "Where the hell was Paulie anyway? What the hell was he doing?"

There was no longer any wheezing on the other end of the line. Clemenza's voice was guarded. "Paulie was sick, he had a cold, so he stayed home. He's been a little sick all winter."

Sonny was instantly alert. "How many times did he stay home the last couple of months?"

"Maybe three or four times," Clemenza said. "I always asked Freddie if he wanted another guy but he said no. There's been no cause, the last ten years things been smooth, you know."

"Yeah," Sonny said. "I'll see you at my father's house. Be sure you bring Paulie. Pick him up on your way over. I don't care how sick he is. You got that?" He slammed down the phone without waiting for an answer.

His wife was weeping silently. He stared at her for a moment, then said in a harsh voice, "Any of our people call, tell them to get me in my father's house on his special phone. Anybody else call, you don't know nothing. If Tom's wife calls, tell her that Tom won't be home for a while, he's on business."

He pondered for a moment. "A couple of our people will come to stay here." He saw her look of fright and said impatiently, "You don't have to be scared, I just want them here. Do

whatever they tell you to do. If you wanta talk to me, get me on Pop's special phone but don't call me unless it's really important. And don't worry." He went out of the house.

Darkness had fallen and the December wind whipped through the mall. Sonny had no fear about stepping out into the night. All eight houses were owned by Don Corleone. At the mouth of the mall the two houses on either side were rented by family retainers with their own families and star boarders, single men who lived in the basement apartments. Of the remaining six houses that formed the rest of the half circle; one was inhabited by Tom Hagen and his family, his own, and the smallest and least ostentatious by the Don himself. The other three houses were given rent-free to retired friends of the Don with the understanding that they would be vacated whenever he requested. The harmless-looking mall was an impregnable fortress.

All eight houses were equipped with floodlights which bathed the grounds around them and made the mall impossible to lurk in. Sonny went across the street to his father's house and let himself inside with his own key. He yelled out, "Ma, where are you?" and his mother came out of the kitchen. Behind her rose the smell of frying peppers. Before she could say anything, Sonny took her by the arm and made her sit down. "I just got a call," he said. "Now don't get worried. Pop's in the hospital, he's hurt. Get dressed and get ready to get down there. I'll have a car and a driver for you in a little while. OK?"

His mother looked at him steadily for a moment and then asked in Italian, "Have they shot him?"

Sonny nodded. His mother bowed her head for a moment. Then she went back into the kitchen. Sonny followed her. He watched her turn off the gas under the panful of peppers and then go out and up to the bedroom. He took peppers from the pan and bread from the basket on the table and made a sloppy sandwich with hot olive oil dripping from his fingers. He went into the huge corner room that was his father's office and took the special phone from a locked cabinet box. The phone had been especially installed and was listed under a phony name and a phony address. The first person he called was Luca Brasi. There was no answer. Then he called the safety-valve *caporegime* in Brooklyn, a man of unquestioned loyalty to the Don. This man's name was Tessio. Sonny told him what had happened and what he wanted. Tessio was to recruit fifty absolutely reliable men. He was to send guards to the hospital, he was to send men out to Long Beach to work here. Tessio asked, "Did they get Clemenza too?" Sonny said, "I don't want to use Clemenza's people right now." Tessio understood immediately, there was a pause, and then he said, "Excuse me, Sonny, I say this as your father would say it. Don't move too fast. I can't believe Clemenza would betray us."

"Thanks," Sonny said. "I don't think so but I have to be careful. Right?" "Right," Tessio said.

"Another thing," Sonny said. "My kid brother Mike goes to college in Hanover, New Hampshire. Get some people we know in Boston to go up and get him and bring him down here to the house until this blows over. I'll call him up so he'll expect them. Again I'm just playing the percentages, just to make sure."

"OK," Tessio said, "I'll be over your father's house as soon as I get things rolling. OK? You know my boys, right?"

"Yeah," Sonny said. He hung up. He went over to a small wall safe and unlocked it. From it he took an indexed book bound in blue leather. He opened it to the T's until he found the entry he was looking for. It read, "Ray Farrell $5,000 Christmas Eve." This was followed by a telephone number. Sonny dialed the number and said, "Farrell?" The man on the other end answered, "Yes." Sonny said, "This is Santino Corleone. I want you to do me a favor and I want you to do it right away. I want you to check two phone numbers and give me all the calls they got and all the calls they made for the last three months." He gave Farrell the number of Paulie Gatto's home and Clemenza's home. Then he said, "This is important. Get it to me before midnight and you'll have an extra very Merry Christmas."

Before he settled back to think things out he gave Luca Brasi's number one more call. Again there was no answer. This worried him but he put it out of his mind. Luca would come to the house as soon as he heard the news. Sonny leaned back in the swivel chair. In an hour the house would be swarming with Family people and he would have to tell them all what to do, and now that he finally had time to think he realized how serious the situation was. It was the first challenge to the Corleone Family and their power in ten years. There was no doubt that Sollozzo was behind it, but he would never have dared attempt such a stroke unless he had support from at least one of the five great New York families. And that support must have come from the Tattaglias. Which meant a full-scale war or an immediate settlement on Sollozzo's terms. Sonny smiled grimly. The wily Turk had planned well but he had been unlucky. The old man was alive and so it was war. With Luca Brasi and the resources of the Corleone Family there could be but one outcome. But again the nagging worry. Where was Luca Brasi?

# Chapter 03

Counting the driver, there were four men in the car with Hagen. They put him in the back seat, in the middle of the two men who had come up behind him in the street. Sollozzo sat up front. The man on Hagen's right reached over across his body and tilted Hagen's hat over his eyes so that he could not see. "Don't even move your pinkie," he said.

It was a short ride, not more than twenty minutes and when they got out of the car Hagen could not recognize the neighborhood because darkness had fallen. They led him into a basement apartment and made him sit on a straightbacked kitchen chair. Sollozzo sat across the kitchen table from him. His dark face had a peculiarly vulturine look.

"I don't want you to be afraid," he said. "I know you're not in the muscle end of the Family. I want you to help the Corleones and I want you to help me."

Hagen's hands were shaking as he put a cigarette in his mouth. One of the men brought a bottle of rye to the table and gave him a slug of it in a china coffee cup. Hagen drank the fiery liquid gratefully. It steadied his hand and took the weakness out of his legs.

"Your boss is dead," Sollozzo said. He paused, surprised at the tears that sprang to Hagen's eyes. Then he went on. "We got him outside his office, in the street. As soon as I got the word, I picked you up. You have to make the peace between me and Sonny."

Hagen didn't answer. He was surprised at his own grief. And the feeling of desolation mixed with his fear of death. Sollozzo was speaking again. "Sonny was hot for my deal. Right? You know it's the smart thing to do too. Narcotics is the coming thing. There's so much money in it that everybody can get rich just in a couple of years. The Don was an old 'Moustache Pete,' his day was over but he didn't know it. Now he's dead, nothing can bring him back. I'm ready to make a new deal, I want you to talk Sonny into taking it."

Hagen said, "You haven't got a chance. Sonny will come after you with everything he's got."

Sollozzo said impatiently, "That's gonna be his first reaction. You have to talk some sense to him. The Tattaglia Family stands behind me with all their people. The other New York families will go along with anything that will stop a full-scale war between us. Our war has to hurt them and their businesses. If Sonny goes along with the deal, the other Families in the country will consider it none of their affair, even the Don's oldest friends."

Hagen stared down at his hands, not answering. Sollozzo went on persuasively. "The Don was slipping. In the old days I could never have gotten to him. The other Families distrust him because he made you his *Consigliere* and you're not even Italian, much less Sicilian. If it goes to all-out war the Corleone Family will be smashed and everybody loses, me included. I need the Family political contacts more than I need the money even. So talk to Sonny, talk to the *caporegimes*; you'll save a lot of bloodshed."

Hagen held out his china cup for more whiskey. "I'll try," he said. "But Sonny is strong-headed. And even Sonny won't be able to call off Luca. You have to worry about Luca. *I'll* have to worry about Luca if I go for your deal."

Sollozzo said quietly, "I'll take care of Luca. You take care of Sonny and the other two kids. Listen, you can tell them that Freddie would have gotten it today with his old man but my people had strict orders not to gun him. I didn't want any more hard feelings than necessary. You can tell them that, Freddie is alive because of me."

Finally Hagen's mind was working. For the first time he really believed that Sollozzo did not mean to kill him or hold him as a hostage. The sudden relief from fear that flooded his body made him flush with shame. Sollozzo watched him with a quiet understanding smile. Hagen began to think things out. If he did not agree to argue Sollozzo's case, he might be killed. But then he realized that Sollozzo expected him only to present it and present it properly, as he was bound to do as a responsible *Consigliere*. And now, thinking about it, he also realized that Sollozzo was right. An unlimited war between the Tattaglias and the Corleones must be avoided at all costs. The Corleones must bury their dead and forget, make a deal. And then when the time was right they could move against Sollozzo.

But glancing up, he realized that Sollozzo knew exactly what he was thinking. The Turk

was smiling. And then it struck Hagen. What had happened to Luca Brasi that Sollozzo was so unconcerned? Had Luca made a deal? He remembered that on the night Don Corleone had refused Sollozzo, Luca had been summoned into the office for a private conference with the Don. But now was not the time to worry about such details. He had to get back to the safety of the Corleone Family fortress in Long Beach. "I'll do my best," he said to Sollozzo. "I believe you're right, it's even what the Don would want us to do."

Sollozzo nodded gravely. "Fine," he said. "I don't like bloodshed, I'm a businessman and blood costs too much money." At that moment the phone rang and one of the men sitting behind Hagen went to answer it. He listened and then said curtly, "OK, I'll tell him." He hung up the phone, went to Sollozzo's side and whispered in the Turk's ear. Hagen saw Sollozzo's face go pale, his eyes glitter with rage. He himself felt a thrill of fear. Sollozzo was looking at him speculatively and suddenly Hagen knew that he was no longer going to be set free. That something had happened that might mean his death. Sollozzo said, "The old marl is still alive. Five bullets in his Sicilian hide and he's still alive." He gave a fatalistic shrug. "Bad luck," he said to Hagen. "Bad luck for me. Bad luck for you."

# Chapter 04

When Michael Corleone arrived at his father's house in Long Beach he found the narrow entrance mouth of the mall blocked off with a link chain. The mall itself was bright with the floodlights of all eight houses, outlining at least ten cars parked along the curving cement walk.

Two men he didn't know were leaning against the chain. One of them asked in a Brooklyn accent, "Who're you?"

He told them. Another man came out of the nearest house and peered at his face. "That's the Don's kid," he said. "I'll bring him inside." Mike followed this man to his father's house, where two men at the door let him and his escort pass inside.

The house seemed to be full of men he didn't know, until he went into the living room. There Michael saw Tom Hagen's wife, Theresa, sitting stiffly on the sofa, smoking a cigarette. On the coffee table in front of her was a glass of whiskey. On the other side of the sofa sat the bulky Clemenza. The *caporegime's* face was impassive, but he was sweating and the cigar in his hand glistened slickly black with his saliva.

Clemenza came to wring his hand in a consoling way, muttering, "Your mother is at the hospital with your father, he's going to be all right." Paulie Gatto stood up to shake hands. Michael looked at him curiously. He knew Paulie was his father's bodyguard but did not know that Paulie had stayed home sick that day. But he sensed tension in the thin dark face. He knew Gatto's reputation as an up-and-coming man, a very quick man who knew how to get delicate jobs done without complications, and today he had failed in his duty. He noticed several other men in the corners of the room but he did not recognize them. They were not of Clemenza's people. Michael put these facts together and understood. Clemenza and Gatto were suspect. Thinking that Paulie had been at the scene, he asked the ferret-faced young man, "How is Freddie? He OK?"

"The doctor gave him a shot," Clemenza said. "He's sleeping."

Michael went to Hagen's wife and bent down to kiss her cheek. They had always liked each other. He whispered, "Don't worry, Tom will be OK. Have you talked to Sonny yet?"

Theresa clung to him for a moment and shook her head. She was a delicate, very pretty woman, more American than Italian, and very scared. He took her hand and lifted her off the sofa. Then he led her into his father's corner room office.

Sonny was sprawled out in his chair behind the desk holding a yellow pad in one hand and a pencil in the other. The only other man in the room with him was the *caporegime* Tessio, whom Michael recognized and immediately realized that it must be his men who were in the house and forming the new palace guard. He too had a pencil and pad in his hands.

When Sonny saw them he came from behind his desk and took Hagen's wife in his arms. "Don't worry, Theresa," he said. "Tom's OK. They just wanta give him the proposition, they said they'd turn him loose. He's not on the operating end, he's just our lawyer. There's no reason for anybody to do him harm."

He released Theresa and then to Michael's surprise he too, got a hug and a kiss on the cheek. He pushed Sonny away and said grinning, "After I get used to you beating me up I gotta put up with this?" They had often fought when they were younger.

Sonny shrugged. "Listen, kid, I was worried when I couldn't get ahold of you in that hick town. Not that I gave a crap if they knocked you off, but I didn't like the idea of bringing the news to the old lady. I had to tell her about Pop."

"How'd she take it?" Michael asked.

"Good," Sonny said. "She's been through it before. Me too. You were too young to know about it and then things got pretty smith while you were growing up." He paused and then said, "She's down at the hospital with the old man. He's gonna pull through."

"How about us going down?" Michael asked.

Sonny shook his head and said dryly, "I can't leave this house until it's all over." The phone rang. Sonny picked it up and listened intently. While he was listening Michael sauntered over to the desk and glanced down at the yellow pad Sonny had been writing on. There was a list of seven names. The first three were Sollozzo, Phillip Tattaglia, and John Tattaglia. It struck Michael with full force that he had interrupted Sonny and Tessio as they were making up a list of men to be killed.

When Sonny hung up the phone he said to Theresa Hagen and Michael, "Can you two wait outside? I got some business with Tessio we have to finish."

Hagen's wife said, "Was that call about Tom?" She said it almost truculently but she was

weeping with fright. Sonny put his arm around her and led her to the door. "I swear he's going to be OK," he said. "Wait in the living room. I'll come out as soon as I hear something." He shut the door behind her. Michael had sat down in one of the big leather armchairs. Sonny gave him a quick sharp look and then went to sit down behind the desk.

"You hang around me, Mike," he said, "you're gonna hear things you don't wanta hear." Michael lit a cigarette. "I can help out," he said.

"No, you can't," Sonny said. "The old man would be sore as hell if I let you get mixed up in this."

Michael stood up and yelled. "You lousy bastard, he's my father. I'm not supposed to help him? I can help. I don't have to go out and kill people but I can help. Stop treating me like a kid brother. I was in the war. I got shot, remember? I killed some Japs. What the hell do you think I'll do when you knock somebody off? Faint?"

Sonny grinned at him. "Pretty soon you'll want me to put up my dukes. OK, stick around, you can handle the phone." He turned to Tessio. "That call I just got gave me dope we needed." Hd turned to Michael. "Somebody had to finger the old man. It could have been Clemenza, it could have been Paulie Gatto, who was very conveniently sick today. I know the answer now, let's see how smart you are, Mike, you're the college boy. Who sold out to Sollozzo?"

Michael sat down again and relaxed back into the leather armchair. He thought everything over very carefully. Clemenza was a *caporegime* in the Corleone Family structure. Don Corleone had made him a millionaire and they had been intimate friends for over twenty years. He held one of the most powerful posts in the organization. What could Clemenza gain for betraying his Don? More money? He was rich enough but then men are always greedy. More power? Revenge for some fancied insult or slight? That Hagen had been made the *Consigliere*? Or perhaps a businessman's conviction that Sollozzo would win out? No, it was impossible for Clemenza to be a traitor, and then Michael thought sadly it was only impossible because he didn't want Clemenza to die. The fat man had always brought him gifts when he was growing up, had sometimes taken him on outings when the Don had been too busy. He could not believe that Clemenza was guilty of treachery.

But, on the other hand, Sollozzo would want Clemenza in his pocket more than any other man in the Corleone Family.

Michael thought about Paulie Gatto. Paulie as yet had not become rich. He was well thought of, his rise in the organization was certain but he would have to put in his time like everybody else. Also he would have wilder dreams of power, as the young always do. It had to be Paulie. And then Michael remembered that in the sixth grade he and Paulie had been in the same class in school and he didn't want it to be Paulie either.

He shook his head. "Neither one of them," he said. But he said it only because Sonny had said he had the answer. If it had been a vote, he would have voted Paulie guilty.

Sonny was smiling at him. "Don't worry," he said. "Clemenza is OK. It's Paulie."

Michael could see that Tessio was relieved. As a fellow *caporegime* his sympathy would be with Clemenza. Also the present situation was not so serious if treachery did not reach so high. Tessio said cautiously, "Then I can send my people home tomorrow?"

Sonny said, "The day after tomorrow. I don't want anybody to know about this until then. Listen, I want to talk some family business with my brother, personal. Wait out in the living room, eh? We can finish our list later. You and Ctemenza will work together on it."

"Sure," Tessio said. He went out.

"How do you know for sure it's Paulie?" Michael asked.

Sonny said, "We have people in the telephone company and they tracked down all of Paulie's phone calls in and out. Clemenza's too. On the three days Paulie was sick this month he got a call from a street booth across from the old man's building. Today too. They were checking to see if Paulie was coming down or somebody was being sent down to take his place. Or for some other reason. It doesn't matter." Sonny shrugged. "Thank God it was Paulie. We'll need Clemenza bad."

Michael asked hesitantly, "Is it going to be an all-out war?"

Sonny's eyes were hard. "That's how I'm going to play it as soon as Tom checks in. Until the old man tells me different."

Michael asked, "So why don't you wait until the old man can tell you?"

Sonny looked at him curiously. "How the hell did you win those combat medals? We are under the gun, man, we gotta fight. I'm just afraid they won't let Tom go."

Michael was surprised at this. "Why not?"

Again Sonny's voice was patient. "They snatched Tom because they figured the old man was finished and they could make a deal with me and Tom would be the sit-down guy in the preliminary stages, carry the proposition. Now with the old man alive they know I can't make a deal so Tom's no good to them. They can turn him loose or dump him, depending how Sollozzo feels. If they dump him, it would be just to show us they really mean business, trying to bulldoze us."

Michael said quietly, "What made Sollozzo think he could get a deal with you?"

Sonny flushed and he didn't answer for a moment. Then he said, "We had a meeting a few months ago, Sollozzo came to us with a proposition on drugs. The old man turned him down. But during the meeting I shot off my mouth a little, I showed I wanted the deal. Which is absolutely the wrong thing to do; if there's one thing the old man hammered into me it's

never, to do a thing like that, to let other people know there's a split of opinion in the Family. So Sollozzo figures he gets rid of the old man, I have to go in with him on the drugs. With the old man gone, the Family power is cut at least in half. I would be fighting for my life anyway to keep all the businesses the old man got together. Drugs are the coming thing, we should get into it. And his knocking off the old man is purely business, nothing personal. As a matter of business I would go in with him. Of course he would never let me get too close, he'd make sure I'd never get a clean shot at him, just in case. But he also knows that once I accepted the deal the other Families would never let me start a war a couple of years later just for revenge. Also, the Tattaglia Family is behind him."

"If they had gotten the old man, what would you have done?" Michael asked.

Sonny said very simply, "Sollozzo is dead meat. I don't care what it costs. I don't care if we have to fight all the five families in New York. The Tattaglia Family is going to be wiped out. I don't care if we all go down together."

Michael said softly, "That's not how Pop would have played it."

Sonny made a violent gesture. "I know I'm not the man he was. But I'll tell you this and he'll tell you too. When it comes to real action I can operate as good as anybody, short-range. Sollozzo knows that and so do Clemenza and Tessio, I 'made my bones' when I was nineteen, the last time the Family had a war, and I was a big help to the old man. So I'm not worried now. And our Family has all the horses in a deal like this. I just wish we could get contact with Luca."

Michael asked curiously, "Is Luca that tough, like they say? Is he that good?"

Sonny nodded. "He's in a class by himself. I'm going to send him after the three Tattaglias. I'll get Sollozzo myself."

Michael shifted uneasily in his chair. He looked at his older brother. He remembered Sonny as being sometimes casually brutal but essentially warmhearted. A nice guy. It seemed unnatural to hear him talking this way, it was chilling to see the list of names he had scribbled down, men to be executed, as if he were some newly crowned Roman Emperor. He was glad that he was not truly part of all this, that now his father lived he did not have to involve himself in vengeance. He'd help out, answering the phone, running errands and messages. Sonny and the old man could take care of themselves, especially with Luca behind them.

At that moment they heard a woman scream in the living room. Oh, Christ, Michael thought, it sounded like Tom's wife. He rushed to the door and opened it. Everybody in the living room was standing. And by the sofa Tom Hagen was holding Theresa close to him, his face embarrassed. Theresa was weeping and sobbing, and Michael realized that the scream he had heard had been her calling out her husband's name with joy. As he watched, Tom Hagen disentangled himself from his wife's arms and lowered her back onto the sofa. He smiled at Michael grimly. "Glad to see you, Mike, really glad." He strode into the office without another look at his still-sobbing wife. He hadn't lived with the Corleone Family ten

years for nothing, Michael thought with a queer flush of pride. Some of the old man had rubbed off on him, as it had on Sonny, and he thought, with surprise, even on himself.

# Chapter 05

It was nearly four o'clock in the morning as they all sat in the corner room office--- Sonny, Michael, Tom Hagen, Clemenza and Tessio. Theresa Hagen had been persuaded to go to her own home next door. Paulie Gatto was still waiting in the living room, not knowing that Tessio's men had been instructed not to let him leave or let him out of their sight.

Tom Hagen relayed the deal Sollozzo offered. He told how after Sollozzo had learned the Don still lived, it was obvious that he meant to kill Hagen. Hagen grinned. "If I ever plead before the Supreme Court, I'll never plead better than I did with that goddamn Turk tonight. I told him I'd talk the Family into the deal even though the Don was alive. I told him I could wrap you around my finger, Sonny. How we were buddies as kids; and don't get sore, but I let him get the idea that maybe you weren't too sorry about getting the old man's job, God forgive me." He smiled apologetically at Sonny, who made a gesture signifying that he understood, that it was of no consequence.

Michael, leaning back in his armchair with the phone at his right hand, studied both men. When Hagen had entered the room Sonny had come rushing to embrace him. Michael realized with a faint twinge of jealousy that in many ways Sonny and Tom Hagen were closer than he himself could ever be to his own brother.

"Let's get down to business," Sonny said. "We have to make plans. Take a look at this list me and Tessio made up. Tessio, give Clemenza your copy."

"If we make plans," Michael said, "Freddie should be here."

Sonny said grimly, "Freddie is no use to us. The doctor says he's in shock so bad he has to have complete rest. I don't understand that. Freddie was always a pretty tough guy. I guess seeing the old man gunned down was hard on him, he always thought the Don was God. He wasn't like you and me, Mike."

Hagen said quickly, "OK, leave Freddie out. Leave him out of everything, absolutely everything. Now, Sonny, until this is all over I think you should stay in the house. I mean sever leave it. You're safe here. Don't underrate Sollozzo, he's got to be a *pezzonovante*, a real .90 caliber. Is the hospital covered?"

Sonny nodded. "The cops have it locked in and I got my people there visiting Pop all the time. What do you think of that list, Tom?"

Hagen frowned down at the fist of names: "Jesus Christ, Sonny, you're really taking this personal. The Don would consider it a purely business dispute. Sollozzo is the key. Get rid of Sollozzo and everything falls in line. You don't have to go after the Tattaglias."

Sonny looked at his two *caporegimes*. Tessio shrugged. "It's tricky," he said. Clemenza

didn't answer at all.

Sonny said to Clemenza, "One thing we can take care of without discussion. I don't want Paulie around here anymore. Make that first on your list." The fat *caporegime* nodded.

Hagen said, "What about Luca? Sollozzo didn't seem worried about Luca. That *worries* me. If Luca sold us out, we're in real trouble. That's the first thing we have to know. Has anybody been able to get in touch with him?"

"No," Sonny said. "I've been calling him all night. Maybe he's shacked up."

"No," Hagen said. "He never sleeps over with a broad. He always goes home when he's through. Mike, keep ringing his number until you get an answer." Michael dutifully picked up the phone and dialed. He could hear the phone ringing on the other end but no one answered. Finally he hung up. "Keep trying every fifteen minutes," Hagen said.

Sonny said impatiently, "OK, Tom you're the *Consigliere*, how about some advice? What the hell do you think we should do?"

Hagen helped himself to the whiskey bottle on the desk. "We negotiate with Sollozzo until your father is in shape to take charge. We might even make a deal if we have to. When your father gets out of bed he can settle the whole business without a fuss and all the Families will go along with him."

Sonny said angrily, "You think I can't handle this guy Sollozzo?"

Tom Hagen looked him directly in the eye. "Sonny, sure you can outfight him. The Corleone Family has the power. You have Clemenza and Tessio here and they can muster a thousand men if it comes to an all-out war. But at the end there will be a shambles over the whole East Coast and all the other Families will blame the Corleones. We'll make a lot of enemies. And that's something your father never believed in."

Michael, watching Sonny, thought he took this well. But then Sonny said to Hagen, "What if the old man dies, what do you advise then, *Consigliere?*"

Hagen said quietly, "I know you won't do it, but I would advise you to make a real deal with Sollozzo on the drugs. Without your father's political contacts and personal influence the Corleone Family loses half its strength. Without your father, the other New York Families might wind up supporting the Tattaglias and Sollozzo just to make sure there isn't a long destructive war. If your father dies, make the deal. Then wait and see."

Sonny was white-faced with anger. "That's easy for you to say, it's not your father they killed."

Hagen said quickly and proudly, "I was as good a son to him as you or Mike, maybe better. I'm giving you a professional opinion. Personally I want to kill all those bastards." The emotion in his voice shamed Sonny, who said, "Oh, Christ, Tom, I didn't mean it that way."

But he had, really. Blood was blood and nothing else was its equal.

Sonny brooded for a moment as the others waited in embarrassed silence. Then he sighed and spoke quietly. "OK, we'll sit tight until the old man can give us the lead. But, Tom, I want you to stay inside the mall, too. Don't take any chances. Mike, you be careful, though I don't think. even Sollozzo would bring personal family into the war. Everybody would be against him then. But be careful. Tessio, you hold your people in reserve but have them nosing around the city. Clemenza, after you settle the Paulie Gatto thing, you move your men into the house and the mall to replace Tessio's people. Tessio, you keep your men at the hospital, though. Tom, start negotiation over the phone or by messenger with Sollozzo and the Tattaglias the first thing in the morning. Mike, tomorrow you take a couple of Clemenza's people and go to Luca's house and wait for him to show up or find out where the hell he is. That crazy bastard might be going after Sollozzo right now if he's heard the news. I can't believe he'd ever go against his Don, no matter what the Turk offered him."

Hagen said reluctantly, "Maybe Mike shouldn't get mixed up in this so directly."

"Right," Sonny said. "Forget that, Mike. Anyway I need you on the phone here in the house, that's more important."

Michael didn't say anything. He felt awkward, almost ashamed, and he noticed Clemenza and Tessio with faces so carefully impassive that he was sure that they were hiding their contempt. He picked up the phone and dialed Luca Brasi's number and kept the receiver to his ear as it rang and rang.

# Chapter 06

Peter Clemenza slept badly that night. In the morning he got up early and made his own breakfast of a glass of *grappa*, a thick slice of Genoa salami with a chunk of fresh Italian bread that was still delivered to his door as in the old days. Then he drank a great, plain china mug filled with hot coffee that had been lashed with anisette. But as he padded about the house in his old bathrobe and red felt slippers he pondered on the day's work that lay ahead of him. Last night Sonny Corleone had made it very clear that Paulie Gatto was to be taken care of immediately. It had to be today.

Clemenza was troubled. Not because Gatto had been his protégé and had turned traitor. This did not reflect on the *caporegime's* judgment. After all, Paulie's background had been perfect. He came from a Sicilian family, he had grown up in the same neighborhood as the Corleone children, had indeed even gone to school with one of the sons. He had been brought up through each level in the proper manner. He had been tested and not found wanting. And then after he had "made his bones" he had received a good living from the Family, a percentage of an East Side "book" and a union payroll slot. Clemenza had not been unaware that Paulie Gatto 'supplemented his income with free-lance stickups, strictly against the Family rules, but even this was a sign of the man's worth. The breaking of such regulations was considered a sign of high-spiritedness, like that shown by a fine racing horse fighting the reins.

And Paulie had never caused trouble with his stickups. They had always been meticulously planned and carried out with the minimum of fuss and trouble, with no one ever getting hurt: a three-thousand-dollar Manhattan garment center payroll, a small chinaware factory payroll in the slums of Brooklyn. After all, a young man could always use some extra pocket money. It was all in the pattern. Who could ever foretell that Paulie Gatto would turn traitor?

What was troubling Peter Clemenza this morning was an administrative problem. The actual execution of Gatto was a cut-and-dried chore. The problem was, who should the *caporegime* bring up from the ranks to replace Gatto in the Family? It was an important promotion, that to "button" man, one not to be handed out lightly. The man had to be tough and he had to be smart. He had to be safe, not a person who would talk to the police if he got in trouble, one well saturated in the Sicilians' law of *omerta*, the law of silence. And then, what kind of a living would he receive for his new duties? Clemenza had several times spoken to the Don about better rewards for the all-important button man who was first in the front line when trouble arose, but the Don had put him off. If Paulie had been making more money, he might have been able to resist the blandishments of the wily Turk, Sollozzo.

Clemenza finally narrowed down the list of candidates to three men. The first was an enforcer who worked with the colored policy bankers in Harlem, a big brawny brute of a man of great physical strength, a man with a great deal of personal charm who could get along with people and yet when necessary make them go in fear of him. But Clemenza scratched him off the list after considering his name for a half hour. This man got along too well with the black people, which hinted at some flaw of character. Also he would be too hard to replace in the position he now held.

The second name Clemenza considered and almost settled on was a hard-working chap who served faithfully and well in the organization. This man was the collector of delinquent accounts for Family-licensed shylocks in Manhattan. He had started off as a bookmaker's runner. But he was not quite yet ready for such an important promotion.

Finally he settled on Rocco Lampone. Lampone had served a short but impressive apprenticeship in the Family. During the war he had been wounded in Africa and been discharged in 1943. Because of the shortage of young men, Clemenza had taken him on even though Lampone was partially incapacitated by his injuries and walked with a pronounced limp. Clemenza had used him as a black-market contact in the garment center and with government employees controlling OPA food stamps. From that, Lampone had graduated to trouble-shooter for the whole operation. What Clemenza liked about him was his good judgment. He knew that there was no percentage in being tough about something that would only cost a heavy fine or six months in jail, small prices to pay for the enormous profits earned. He had the good sense to know that it was not an area for heavy threats but light ones. He kept the whole operation in a minor key, which was exactly what was needed.

Clemenza felt the relief of a conscientious administrator who has solved a knotty personnel problem. Yes, it would be Rocco Lampone who would assist. For Clemenza planned to handle this job himself, not only to help a new, inexperienced man "make his bones," but to settle a personal score with Paulie Gatto. Paulie had been his protégé, he had

advanced Paulie over the heads of more deserving and more loyal people, he had helped Paulie "make his bones" and furthered his career in every way. Paulie had not only betrayed the Family, he had betrayed his *padrone*, Peter Clemenza. This lack of respect had to be repaid.

Everything else was arranged. Paulie Gatto had been instructed to pick him up at three in the afternoon, and to pick him up with his own car, nothing hot. Now Clemenza took up the telephone and dialed Rocco Lampone's number. He did not identify himself. He simply said, "Come to my house, I have an errand for you." He was pleased to note that despite the early hour, Lampone's voice was not surprised or dazed with sleep and he simply said, "OK." Good man. Clemenza added, "No rush, have your breakfast and lunch first before you come see me. But not later than two in the afternoon."

There was another laconic OK on the other end and Clemenza hung up the phone. He had already alerted his people about replacing *caporegime* Tessio's people in the Corleone mall so that was done. He had capable subordinates and never interfered in a mechanical operation of that kind.

He decided to wash his Cadillac. He loved the car. It gave him such a quiet peaceful ride, and its upholstery was so rich that he sometimes sat in it for an hour when the weather was good because it was more pleasant than sitting in the house. And it always helped him think when he was grooming the car. He remembered his father in Italy doing the same thing with donkeys.

Clemenza worked inside the heated garage, he hated cold. He ran over his plans. You had to be careful with Paulie, the man was like a rat, he could smell danger. And now of course despite being so tough he must be shitting in his pants because the old man was still alive. He'd be as skittish as a donkey with ants up his ass. But Clemenza was accustomed to these circumstances, usual in his work. First, he had to have a good excuse for Rocco to accompany them. Second, he had to have a plausible mission for the three of them to go on.

Of course, strictly speaking, this was not necessary. Paulie Gatto could be killed without any of these frills. He was locked in, he could not run away. But Clemenza felt strongly that it was important to keep good working habits and never give away a fraction of a percentage point. You never could tell what might happen and these matters were, after all, questions of life and death.

As he washed his baby-blue Cadillac, Peter Clemenza pondered and rehearsed his lines, the expressions of his face. He would be curt with Paulie, as if displeased with him. With a man so sensitive and suspicious as Gatto this would throw him off the track or at least leave him uncertain. Undue friendliness would make him wary. But of course the curtness must not be too angry. It had to be rather an absentminded sort of irritation. And why Lampone? Paulie would find that most alarming, especially since Lampone had to be in the rear seat. Paulie wouldn't like being helpless at the wheel with Lampone behind his head. Clemenza rubbed and polished the metal of his Cadillac furiously. It was going to be tricky. Very tricky. For a moment he debated whether to recruit another man but decided against it. Here he followed basic reasoning. In years to come a situation might arise where it might be

profitable for one of his partners to testify against him. If there were just one accomplice it was one's word against the other. But the word of a second accomplice could swing the balance. No, they would stick to procedure.

What annoyed Clemenza was that the execution had to be "public." That is, the body was to be found. He would have much preferred having it disappear. (Usual burying grounds were the nearby ocean or the swamplands of New Jersey on land owned by friends of the Family or by other more complicated methods.) But it had to be public so that embryo traitors would be frightened and the enemy warned that the Corleone Family had by no means gone stupid or soft. Sollozzo would be made wary by this quick discovery of his spy. The Corleone Family would win back some of its prestige. It had been made to look foolish by the shooting of the old man.

Clemenza sighed. The Cadillac gleamed like a huge blue steel egg, and he was nowhere near the solving of his problem. Then the solution hit him, logical and to the point. It would explain Rocco Lampone, himself and Paulie being together and give them a mission of sufficient secrecy and importance.

He would tell Paulie that their job today was to find an apartment in case the Family decided to "go to the mattresses."

Whenever a war between the Families became bitterly intense, the opponents would set up headquarters in secret apartments where the "soldiers" could sleep on mattresses scattered through the rooms. This was not so much to keep their families out of danger, their wives and little children, since any attack on noncombatants was undreamed of. All parties were too vulnerable to similar retaliation. But it was always smarter to live in some secret place where your everyday movements could not be charted either by your opponents or by some police who might arbitrarily decide to meddle.

And so usually a trusted *caporegime* would be sent out to rent a secret apartment and fill it with mattresses. That apartment would be used as a sally port into the city when an offensive was mounted. It was natural for Clemenza to be sent on such an errand. It was natural for him to take Gatto and Lampone with him to arrange all the details, including the furnishing of the apartment. Also, Clemenza thought with a grin, Paulie Gatto had proved he was greedy and the first thought that would pop into his head was how much he could get from Sollozzo for this valuable intelligence.

Rocco Lampone arrived early and Clemenza explained what had to be done and what their roles would be. Lampone's face lit up with surprised gratitude and he thanked Clemenza respectfully for the promotion allowing him to serve the Family. Clemenza was sure he had done well. He clapped Lampone on the shoulder and said, "You'll get something better for your living after today. We'll talk about that later. You understand the Family now is occupied with more critical matters, more important things to do." Lampone made a gesture that said he would be patient, knowing his reward was certain.

Clemenza went to his den's safe and opened it. He took out a gun and gave it to Lampone. "Use this one," he said.. "They can never trace it. Leave it in the car with Paulie. When this

job is finished I want you to take your wife and children on a vacation to Florida. Use your own money now and I'll pay you back later. Relax, get the sun. Use the Family hotel in Miami Beach so I'll know where I can get you when I want."

Clemenza's wife knocked on the door of the den to tell them that Paulie Gatto had arrived. He was parked in the driveway. Clemenza led the way through the garage and Lampone followed him. When Clemenza got into the front seat with Gatto he merely grunted in greeting, an exasperated look on his face. He looked at his wristwatch as if he expected to find that Gatto was late.

The ferret-faced button man was watching him intently, looking for a clue. He flinched a little when Lampone got into the rear seat behind him and said, "Rocco, sit on the other site. A big guy like you blocks up my rear-view mirror." Lampone shifted dutifully, so that he was sitting behind Clemenza, as if such a request was the most natural thing in the world.

Clemenza said sourly to Gatto, "Damn that Sonny, he's running scared. He's already thinking of going to the mattresses. We have to find a place on the West Side. Paulie, you and Rocco gotta staff and supply it until the word comes down for the rest of the soldiers to use it. You know a good location?"

As he had expected, Gatto's eyes became greedily interested. Paulie had swallowed the bait and because he was thinking how much the information was worth to Sollozzo, he was forgetting to think about whether he was in danger. Also, Lampone was acting his part perfectly, staring out the window in a disinterested, relaxed way. Clemenza congratulated himself on his choice.

Gatto shrugged. "I'd have to think about it," he said.

Clemenza grunted. "Drive while you think, I want to get. to New York today."

Paulie was an expert driver and traffic going into the city was light at this time in the afternoon, so the early winter darkness was just beginning to fall when they arrived. There was no small talk in the car. Clemenza directed Paulie to drive up to the Washington Heights section. He checked a few apartment buildings and told him to park near Arthur Avenue and wait. He also left Rocco Lampone in the car. He went into the Vera Mario Restaurant and had a light dinner of veal and salad, nodding his hellos to some acquaintances. After an hour had gone by he walked the several blocks to where the car was parked and entered it. Gatto and Lampone were still waiting. "Shit," Clemenza said, "they want us back in Long Beach. They got some other job for us now. Sonny says we can let this one go until later. Rocco, you live in the city, can we drop you off?"

Rocco said quietly, "I have my car out at your place and my old lady needs it first thing in the morning."

"That's right," Clemenza said. "Then you have to come back with us, after all."

Again on the ride back to Long Beach nothing was said. On the stretch of road that led into

the city, Clemenza said suddenly, "Paulie, pull over, I gotta take a leak." From working together so long, Gatto knew the fat *caporegime* had a weak bladder. He had often made such a request. Gatto pulled the car off the highway onto the soft earth that led to the swamp. Clemenza climbed out of the car and took a few steps into the bushes. He actually relieved himself. Then as he opened the door to get back into the car he took a quick look up and down the highway. There were no lights, the road was completely dark. "Go ahead," Clemenza said. A second later the interior of the car reverberated with the report of a gun. Paulie Gatto seemed to jump forward, his body flinging against the steering wheel and then slumping over to the seat. Clemenza had stepped back hastily to avoid being hit with fragments of skull bone and blood.

Rocco Lampone scrambled out of the back seat. He still held the gun and he threw it into the swamp. He and Clemenza walked hastily to a car parked nearby and got in. Lampone reached underneath the seat and found the key that had been left for them. He started the car and drove Clemenza to his home. Then instead of going back by the same route, he took the Jones Beach Causeway right on through to the town of Merrick and onto the Meadowbrook Parkway until he reached the Northern State Parkway. He rode that to the Long Island Expressway and then continued on to the Whitestone Bridge and through the Bronx to his home in Manhattan.

# Chapter 07

On the night before the shooting of Don Corleone, his strongest and most loyal and most feared retainer prepared to meet with the enemy. Luca Brasi had made contact with the forces of Sollozzo several months before. He had done so on the orders of Don Corleone himself. He had done so by frequenting the nightclubs controlled by the Tattaglia Family and by taking up with one of their top call girls. In bed with this call girl he grumbled about how he was held down in the Corleone Family, how his worth was not recognized. After a week of this affair with the call girl, Luca was approached by Bruno Tattaglia, manager of the nightclub. Bruno was the youngest son, and ostensibly not connected with the Family business of prostitution. But his famous nightclub with its dancing line of long-stemmed beauties was the finishing school for many of the city hookers.

The first meeting was all above-board, Tattaglia offering him a job to work in the Family business as enforcer. The flirtation went on for nearly a month. Luca played his role of man infatuated with a young beautiful girl, Bruno Tattaglia the role of a businessman trying to recruit an able executive from a rival. At one such meeting, Luca pretended to be swayed, then said, "But one thing must be understood. I will never go against the Godfather. Don Corleone is a man I respect. I understand that he must put his sons before me in the Family business."

Bruno Tattaglia was one of the new generation with a barely hidden contempt for the old Moustache Petes like Luca Brasi, Don Corleone and even his own father. He was just a little too respectful. Now he said, "My father wouldn't expect you to do anything against the Corleones. Why should he? Everybody gets along with everybody else now, it's not like the old days. It's just that if you're looking for a new job, I can pass along the word to my father. There's always need for a man like you in our business. It's a hard business and it needs hard

men to keep it running smooth. Let me know if you ever make up your mind." Luca shrugged. "It's not so bad where I'm at." And so they left it.

The general idea had been to lead the Tattaglias to believe that he knew about the lucrative narcotics operation and that he wanted a piece of it free-lance. In that fashion he might hear something about Sollozzo's plans if the Turk had any, or whether he was getting ready to step on the toes of Don Corleone. After waiting for two months with nothing else happening, Luca reported to the Don that obviously Sollozzo was taking his defeat graciously. The Don had told him to keep trying but merely as a sideline, not to press it.

Luca had dropped into the nightclub the evening before Don Corleone's being shot. Almost immediately Bruno Tattaglia had come to his table and sat down.

"I have a friend who wants to talk to you," he said.

"Bring him over," Luca said. "I'll talk to any friend of yours." "No," Bruno said. "He wants to see you in private."

"Who is he?" Luca asked.

"Just a friend of mine," Bruno Tattaglia said. "He wants to put a proposition to you. Can you meet him later on tonight?"

"Sure," Luca said. "What time and where?"

Tattaglia said softly, "The club closes at four in the morning. Why don't you meet in here while the waiters are cleaning ups.

They knew his habits, Luca thought, they must have been checking him out. He usually got up about three or four in the afternoon and had breakfast, then amused himself by gambling with cronies in the Family or had a girl. Sometimes he saw one of the midnight movies and then would drop in for a drink at one of the clubs. He never went to bed before dawn. So the suggestion of a four A.M. meeting was not as outlandish as it seemed.

"Sure, sure," he said. "I'll be back at four." He left the club and caught a cab to his furnished room on Tenth Avenue. He boarded with an Italian family to which he was distantly related. His two rooms were separated from the rest of their railroad flat by a special door. He liked the arrangement because it gave him some family life and also protection against surprise where he was most vulnerable.

The sly Turkish fox was going to show his bushy tail, Luca thought. If things went far enough, if Sollozzo committed himself tonight, maybe the whole thing could be wound up as a Christmas present for the Don. In his room, Luca unlocked the trunk beneath the bed and took out a bulletproof vest. It was heavy. He undressed and put it on over his woolen underwear, then put his shirt and jacket over it. He thought for a moment of calling the Don's

house at Long Beach to tell him of this new development but he knew the Don never talked over the phone, to anyone, and the Don had given him this assignment in secret and so did not want anyone, not even Hagen or his eldest son, to know about it.

Luca always carried a gun. He had a license to carry a gun, probably the most expensive gun license ever issued anyplace, anytime. It had cost a total of ten thousand dollars but it would keep him out of jail if he was frisked by the cops. As a top executive operating official of the Family he rated the license. But tonight, just in case he could finish off the job, he wanted a "safe" gun. One that could not possibly be traced. But then thinking the matter over, he decided that he would just listen to the proposition tonight and report back to the Godfather, Don Corleone.

He made his way back to the club but he did not drink any more. Instead he wandered out to 48th Street, where he had a leisurely late supper at Patsy's, his favorite Italian restaurant. When it was time for his appointment he drifted uptown to the club entrance. The doorman was no longer there when he went in. The hatcheck girl was gone. Only Bruno Tattaglia waited to greet him and lead him to the deserted bar at the side of the room. Before him he could see the desert of small tables with the polished yellow wood dance floor gleaming like a small diamond in the middle of them. In the shadows was the empty bandstand, out of it grew the skeleton metal stalk of a microphone.

Luca sat at the bar and Bruno Tattaglia went behind it. Luca refused the drink offered to him and lit a cigarette. It was possible that this would turn out to be something else, not the Turk. But then he saw Soltozzo emerge out of the shadows at the far end of the room.

Sollozzo shook his hand and sat at the bar next to him. Tattaglia put a glass in front of the Turk, who nodded his thanks. "Do you know who I am?" asked Sollozzo.

Luca nodded. He smiled grimly. The rats were being flushed out of their holes. It would be his pleasure to take care of this renegade Sicilian.

"Do you know what I am going to ask of you?" Sollozzo asked. Luca shook his head.

"There's big business to be made," Sollozzo said. "I mean millions for everybody at the top level. On the first shipment I can guarantee you fifty thousand dollars. I'm talking about drugs. It's the coming thing."

Luca said, "Why come to me? You want me to talk to my Don?"

Sollozzo grimaced. "I've already talked to the Don. He wants no part of it. All right, I can do without him. But I need somebody strong to protect the operation physically. I understand you're not happy with your Family, you might make a switch."

Luca shrugged. "If the offer is good enough."

Sollozzo had been watching him intently and seemed to have come to a decision. "Think

about my offer for a few days and then we'll talk again," he said. He put out his hand but Luca pretended not to see it and busied himself putting a cigarette in his mouth. Behind the bar, Bruno Tattaglia made a lighter appear magically and held it to Luca's cigarette. And then he did a strange thing. He dropped the lighter on the bar and grabbed Lucas right hand, holding it tight.

Luca reacted instantly, his body slipping off the bar stool and trying to twist away. But Sollozzo had grabbed his other hand at the wrist. Still, Luca was too strong for both of them and would have broken free except that a man stepped out of the shadows behind him and threw a thin silken cord around his neck. The cord pulled tight, choking off Lucas breath. His face became purple, the strength in his arms drained away. Tattaglia and Sollozzo held his hands easily now, and they stood there curiously childlike as the man behind Luca pulled the cord around Lucas neck tighter and tighter. Suddenly the floor was wet and slippery. Luca's sphincter, no longer under control, opened, the waste of his body spilled out. There was no strength in him anymore and his legs folded, his body sagged. Sollozzo and Tattaglia let his hands go and only the strangler stayed with the victim, sinking to his knees to follow Lucas falling body, drawing the cord so tight that it cut into the flesh of the neck and disappeared. Lucas eyes were bulging out of his head as if in the utmost surprise and this surprise was the only humanity remaining to him. He was dead.

"I don't want him found," Sollozzo said. "It's important that he not be found right now." He turned on his heel and left, disappearing back into the shadows.

# Chapter 08

The day after the shooting of Don Corleone was a busy time for the Family. Michael stayed by the phone relaying messages to Sonny. Tom Hagen was busy trying to find a mediator satisfactory to both parties so that a conference could be arranged with Sollozzo. The Turk had suddenly become cagey, perhaps he knew that the Family button men of Clemenza and Tessio were ranging far and wide over the city in an attempt to pick up his trail. But Sollozzo was sticking close to his hideout, as were all top members of the Tattaglia Family. This was expected by Sonny, an elementary precaution he knew the enemy was bound to take.

Clemenza was tied up with Paulie Gatto. Tessio had been given the assignment of trying to track down the whereabouts of Luca Brasi. Luca had not been home since the night before the shooting, a bad sign. But Sonny could not believe that Brasi had either turned traitor or had been taken by surprise.

Mama Corleone was staying in the city with friends of the Family so that she could be near the hospital. Carlo Rizzi, the son-in-law, had offered his services but had been told to take care of his own business that Don Corleone had set him up in, a lucrative bookmaking territory in the Italian section of Manhattan. Connie was staying with her mother in town so that she too could visit her father in the hospital.

Freddie was still under sedation in his own room of his parents' house. Sonny and Michael had paid him a visit and had been astonished at his paleness, his obvious illness. "Christ,"

Sonny said to Michael when they left Freddie's room, "he looks like he got plugged worse than the old man."

Michael shrugged. He had seen soldiers in the same condition on the battlefield. But he had never expected it to happen to Freddie. He remembered the middle brother as being physically the toughest one in the family when all of them were kids. But he had also been the most obedient son to his father. And yet everyone knew that the Don had given up on this middle son ever being important to the business. He wasn't quite smart enough, and failing that, not quite ruthless enough. He was too retiring a person, did not have enough force.

Late in the afternoon, Michael got a call from Johnny Fontane in Hollywood. Sonny took the phone. "Nah, Johnny, no use coming back here to see the old man. He's too sick and it would give you a lot of bad publicity, and I know the old man wouldn't like that. Wait until he's better and we can move him home, then come see him. OK, I'll give him your regards." Sonny hung up the phone. He turned to Michael and said. "That'll make Pop happy, that Johnny wanted to fly from California to see how he was."

Late that afternoon, Michael was called to the listed phone in the kitchen by one of Clemenza's men. It was Kay.

"Is your father all right?" she asked. Her voice was a little strained, a little unnatural. Michael knew that she couldn't quite believe what had happened, that his father really was what the newspapers called a gangster.

"He'll be OK," Michael said.

"Can I come with you when you visit him in the hospital?" Kay asked.

Michael laughed. She had remembered him telling her how important it was to do such things if you wanted to get along with the old Italians. "This is a special case," he said. "If the newspaper guys get ahold of your name and background you'll be on page three of the *Daily News*. Girl from old Yankee family mixed up with son of big Mafia chief. How would your parents like that?"

Kay said dryly, "My parents never read the *Daily News*." Again there was an awkward pause and then she said, "You're OK, aren't you, Mike, you're not in any danger?"

Mike laughed again. "I'm known as the sissy of the Corleone family. No threat. So they don't have to bother coming after me. No, it's all over, Kay, there won't be any more trouble. It was all sort of an accident anyway. I'll explain when I see you."

"When will that be?" she asked.

Michael pondered. "How about late tonight? We'll have a drink and supper in your hotel and then I'll go to the hospital and see my old man. I'm getting tired of hanging around here answering phones. OK? But don't tell anybody. I don't want newspaper photographers

snapping pictures of us together. No kidding, Kay, it's damned embarrassing, especially for your parents."

"All right," Kay said. "I'll be waiting. Can I do any Christmas shopping for you? Or anything else?"

"No," Michael said. "Just be ready."

She gave a little excited laugh. "I'll be ready," she said. "Aren't I always?" "Yes, you are," he said. "That's why you're my best girl."

"I love you," she said. "Can you say it?"

Michael looked at the four hood sitting in the kitchen. "No," he said. "Tonight, OK?" "OK," she said. He hung up.

Clemenza had finally come back from his day's work and was bustling around the kitchen cooking up a huge pot of tomato sauce. Michael nodded to him and went to the corner office where he found Hagen and Sonny waiting for him impatiently. "Is Clemenza out there?" Sonny asked.

Michael grinned. "He's cooking up spaghetti for the troops, just like the army."

Sonny said impatiently, "Tell him to cut out that crap and come on in here. I have more important things for him to do. Get Tessio in here with him."

In a few minutes they were all gathered in the office. Sonny said curtly to Clemenza, "You take care of him?"

Clemenza nodded. "You won't see him anymore."

With a slight electric shock, Michael realized they were talking about Paulie Gatto and that little Paulie was dead, murdered by that jolly wedding dancer, Clemenza.

Sonny asked Hagen, "You have any luck with Sollozzo?"

Hagen shook his head. "He seems to have cooled off on the negotiation idea. Anyway he doesn't seem to be too anxious. Or maybe he's just being very careful so that our button men won't nail him. Anyway I haven't been able to set up a top-notch go-between he'll trust. But he must know he has to negotiate now. He missed his chance when he let the old man get away from him."

Sonny said, "He's a smart guy, the smartest our Family ever came up against. Maybe he figured we're just stalling until the old man gets better or we can get a line on him."

Hagen shrugged. "Sure, he figures that. But he still has to negotiate. He has no choice. I'll get it set up tomorrow. That's certain."

One of Clemenza's men knocked on the office door and then came in. He said to Clemenza, "It just came over the radio, the cops found Paulie Gatto. Dead in his car."

Clemenza nodded and said to the man, "Don't worry about it." The button man gave his *caporegime* an astonished look, which was followed by a look of comprehension, before he went back to the kitchen.

The conference went on as if there had been no interruption. Sonny asked Hagen, "Any change in the Don's condition?"

Hagen shook his head. "He's OK but he won't be able to talk for another couple of days. He's all knocked out. Still recovering from the operation. Your mother spends most of the day with him, Connie too. There's cops all over the hospital and Tessio's men hang around too, just in case. In a couple of days he'll be all right and then we can see what he wants us to do. Meanwhile we have to keep Sollozzo from doing anything rash. That's why I want to start you talking deals with him."

Sonny grunted. "Until he does, I've got Clemenza and Tessio looking for him. Maybe we'll get lucky and solve the whole business."

"You won't get lucky," Hagen said. "Sollozzo is too smart." Hagen paused. "He knows once he comes to the table he'll have to go our way mostly. That's why he's stalling. I'm guessing he's trying to line up support from the other New York Families so that we won't go after him when the old man gives us the word."

Sonny frowned. "Why the hell should they do that?"

Hagen said patiently, "To avert a big war which hurts everybody and brings the papers and government into the act. Also, Sollozzo will give them a piece of the action. And you know how much dough there is in drugs. The Corleone Family doesn't need it, we have the gambling, which is the best business to have. But the other Families are hungry. Sollozzo is a proven man, they know he can make the operation go on a big scale. Alive he's money in their pockets, dead he's trouble."

Sonny's face was as Michael had never seen it. The heavy Cupid mouth and bronzed skin seemed gray. "I don't give a fuck what they want. They better not mess in this fight."

Clemenza and Tessio shifted uneasily in their chairs, infantry leaders who hear their general rave about storming an impregnable hill no matter what the cost. Hagen said a little impatiently, "Come on, Sonny, your father wouldn't like you thinking that way. You know what he always says, 'That's a waste.' Sure, we're not going to let anybody stop us if the old man says we go after Sollozzo. But this is not a personal thing, this is business. If we go after the Turk and the Families interfere, we'll negotiate the issue. If the Families see that we're determined to have Sollozzo, they'll let us. The Don will make concessions in other areas to

square things. But don't go blood crazy on a thing like this. It's business. Even the shooting of your father was business, not personal. You should know that by now."

Sonny's eyes were still hard. "OK. I understand all that. Just so long as you understand that nobody stands in our way when we want Sollozzo."

Sonny turned to Tessio. "Any leads on Luca?"

Tessio shook his head. "None at all. Sollozzo must have snatched him."

Hagen said quietly, "Sollozzo wasn't worried about Luca, which struck me as funny. He's too smart not to worry about a guy like Luca. I think he maybe got him out of the picture, one way or the other."

Sonny muttered, "Christ, I hope Luca isn't fighting against us. That's the one thing I'd be afraid of. Clemenza, Tessio, how do you two guys figure it?"

Clemenza said slowly, "Anybody could go wrong, look at Paulie. But with Luca, he was a man who could only go one way. The Godfather was the only thing he believed in, the only man he feared. But not only that, Sonny, he respected your father as no one else respected him and the Godfather has earned respect from everyone. No, Luca would never betray us. And I find it hard to believe that a man like Sollozzo, no matter how cunning, could surprise Luca. He was a man who suspected everyone and everything. He was always ready for the worst. I think maybe he just went off someplace for a few days. We'll be hearing from him anytime now."

Sonny turned to Tessio. The Brooklyn *caporegime* shrugged. "Any man can turn traitor. Luca was very touchy. Maybe the Don offended him some way. That could be. I think though that Sollozzo gave him a little surprise. That fits in with what the *Consigliere* says. We should expect the worst."

Sonny said to all of them, "Sollozzo should get the word soon about Paulie Gatto. How will that affect him?"

Clemenza said grimly, "It will make him think. He will know the Corleone Family are not fools. He will realize that he was very lucky yesterday."

Sonny said sharply, "That wasn't luck. Sollozzo was planning that for weeks. They must have tailed the old man to his office every day and watched his routine. Then they bought Paulie off and maybe Luca. They snatched Tom right on the button. They did everything they wanted to do. They were unlucky, not lucky. Those button men they hired weren't good enough and the old man moved too quick. If they had killed him, I would have had to make a deal and Sollozzo would have won. For now. I would have waited maybe and got him five, ten years from now. But don't call him lucky, Pete, that's underrating him. And we've done that too much lately."

One of the button men brought a bowl of spaghetti in from the kitchen and then some

plates, forks and wine. They ate as they talked. Michael watched in amazement. He didn't eat and neither did Tom, but Sonny, Clemenza and Tessio dug in, mopping up sauce with crusts of bread. It was almost comical. They continued their discussion.

Tessio didn't think that the loss of Paulie Gatto would upset Sollozzo, in fact he thought that the Turk might have anticipated it, indeed might have welcomed it. A useless mouth off the payroll. And he would not be frightened by it; after all, would they be in such a situation?

Michael spoke up diffidently. "I know I'm an amateur in this, but from everything you guys have said about Sollozzo, plus the fact that all of a sudden he's out of touch with Tom, I'd guess he has an ace up his sleeve. He might be ready to pull off something real tricky that would put him back on top. If we could figure out what that would be, we'd be in the driver's seat."

Sonny said reluctantly, "Yeah, I thought of that and the only thing I can figure is Luca. The word is already out that he's to be brought here before he's allowed any of his old rights in the Family. The only other thing I can think of is that Sollozzo has made his deal with the Families in New York and we'll get the word tomorrow that they will be against us in a war. That we'll have to give the Turk his deal. Right, Tom?"

Hagen nodded. "That's what it looks like to me. And we can't move against that kind of opposition without your father. He's the only one who can stand against the Families. He has the political connections they always need and he can use them for trading. If he wants to badly enough."

Clemenza said, a little arrogantly for a man whose top button man had recently betrayed him, "Sollozzo will never get near this house, Boss, you don't have to worry about that."

Sonny looked at him thoughtfully for a moment. Then he said to Tessio, "How about the hospital, your men got it covered?"

For the first time during the conference Tessio seemed to be absolutely sure of his ground. "Outside and inside," he said. "Right around the clock. The cops have it covered pretty good too. Detectives at the bedroom door waiting to question the old man. That's a laugh. The Don is still getting that stuff in the tubes, no food, so we don't have to worry about the kitchen, which would be something to worry about with those Turks, they believe in poison. They can't get at the Don, not in any way."

Sonny tilted back in his chair. "It wouldn't be me, they have to do business with me, they need the Family machine." He grinned at Michael. "I wonder if it's you? Maybe Sollozzo figures to snatch you and hold you for a hostage to make a deal."

Michael thought ruefully, there goes my date with Kay. Sonny wouldn't let him out of the house. But Hagen said impatiently, "No, he could have snatched Mike anytime if he wanted insurance. But everybody knows that Mike is not in the Family business. He's a civilian and if Sollozzo snatches him, then he loses all the other New York Families. Even the Tattaglias would have to help hunt him down. No, it's simple enough. Tomorrow we'll get a

representative from all the Families who'll tell us we have to do business with the Turk. That's what he's waiting for. That's his ace in the hole."

Michael heaved a sigh of relief. "Good," he said. "I have to go into town tonight." "Why?" Sonny asked sharply.

Michael grinned. "I figure I'll drop in to the hospital and visit the old man, see Mom and Connie. And I got some other things to do." Like the Don, Michael never told his real business and now he didn't want to tell Sonny he was seeing Kay Adams. There was no reason not to tell him, it was just habit.

There was a loud murmur of voices in the kitchen. Clemenza went out to see what was happening. When he came back he was holding Luca Brasi's bulletproof vest in his hands. Wrapped in the vest was a huge dead fish.

Clemenza said dryly, "The Turk has heard about his spy Paulie Gatto." Tessio said just as dryly, "And now we know about Luca Brasi."

Sonny lit a cigar and took a shot of whiskey. Michael, bewildered, said. "What the hell does that fish mean?" It was Hagen the Irisher, the *Consigliere*, who answered him. "The fish means that Luca Brasi is sleeping on the bottom of the ocean," he said. "It's an old Sicilian message."

# Chapter 09

When Michael Corleone went into the city that night it was with a depressed spirit. He felt that he was being enmeshed in the Family business against his will and he resented Sonny using him even to answer the phone. He felt uncomfortable being on the inside of the Family councils as if he could be absolutely trusted with such secrets as murder. And now, going to see Kay, he felt guilty about her also. He had never been completely honest with her about his family. He had told her about them but always with little jokes and colorful anecdotes that made them seem more like adventurers in a Technicolor movie than what they really were. And now his father had been shot down in the street and his eldest brother was making plans for murder. That was putting it plainly and simply but that was never how he would tell it to Kay. He had already said his father being shot was more like an "accident" and that all the trouble was over. Hell, it looked like it was just beginning. Sonny and Tom were off-center on this guy Sollozzo, they were still underrating him, even though Sonny was smart enough to see the danger. Michael tried to think what the Turk might have up his sleeve. He was obviously a bold man, a clever man, a man of extraordinary force. You had to figure him to come up with a real surprise. But then Sonny and Tom and Clemenza and Tessio were all agreed that everything was under control and they all had more experience than he did. He was the "civilian" in this war, Michael thought wryly. And they'd have to give him a hell of a lot better medals than he'd gotten in World War II to make him join this one.

Thinking this made him feel guilty about not feeling more sympathy for his father. His own father shot fall of holes and yet in a curious way Michael, better than anyone else, understood when Tom had said it was just business, not personal. That his father had paid for the power he had wielded all his life, the respect he had extorted from all those around him.

What Michael wanted was out, out of all this, to lead his own life. But he couldn't cut loose from the family until the crisis was over. He had to help in a civilian capacity. With sudden clarity he realized that he was annoyed with the role assigned to him, that of the privileged noncombatant, the excused conscientious objector. That was why the word "civilian" kept popping into his skull in such an irritating way.

When he got to the hotel, Kay was waiting for him in the lobby. (A couple of Clemenza's people had driven him into town and dropped him off on a nearby corner after making sure they were not followed.)

They had dinner together and some drinks. "What time are you going to visit your father?" Kay asked.

Michael looked at his watch. "Visiting hours end at eight-thirty. I think I'll go after everybody has left. They'll let me up. He has a private room and his own nurses so I can just sit with him for a while. I don't think he can talk yet or even know if I'm there. But I have to show respect."

Kay said quietly, "I feel so sorry for your father, he seemed like such a nice man at the wedding. I can't believe the things the papers are printing about him. I'm sure most of it's not true."

Michael said politely, "I don't think so either." He was surprised to find himself so secretive with Kay. He loved her, he trusted her, but he would never tell her anything about his father or the Family. She was an outsider.

"What about you?" Kay asked. "Are you going to get mixed up in this gang war the papers are talking about so gleefully?"

Michael grinned, unbuttoned his jacket and held it wide open. "Look, no guns," he said. Kay laughed.

It was getting late and they went up to their room. She mixed a drink for both of them and sat on his lap as they drank. Beneath her dress she was all silk until his hand touched the glowing skin of her thigh. They fell back on the bed together and made love with all their clothes on, their mouths glued together. When they were finished they lay very still, feeling the heat of their bodies burning through their garments. Kay murmured, "Is that what you soldiers call a quickie?"

"Yeah," Michael said.

"It's not bad," Kay said in a judicious voice.

They dozed off until Michael suddenly started up anxiously and looked at his watch. "Damn," he said. "It's nearly ten. I have to get down to the hospital." He went to the bathroom to wash up and comb his hair. Kay came in after him and put her arms around his waist from behind. "When are we going to get married?" she asked.

"Whenever you say," Michael said. "As soon as this family thing quiets down and my old man gets better. I think you'd better explain things to your parents though."

"What should I explain?" Kay said quietly.

Michael ran the comb through his hair. "Just say that you've met a brave, handsome guy of Italian descent. Top marks at Dartmouth. Distinguished Service Cross during the war plus the Purple Heart. Honest. Hard-working. But his father is a Mafia chief who has to kill bad people, sometimes bribe high government officials and in his line of work gets shot full of holes himself. But that has nothing to do with his honest hardworking son. Do you think you can remember all that?"

Kay let go his body and leaned against the door of the bathroom. "Is he really?" she said. "Does he really?" She paused. "Kill people?"

Michael finished combing his hair. "I don't really know," he said. "Nobody really knows. But I wouldn't be surprised."

Before he went out the door she asked, "When will I see you again?"

Michael kissed her. "I want you to go home and think things over in that little hick town of yours," he said. "I don't want you to get mixed up in this business in any way. After the Christmas holidays I'll be back at school and we'll get together up in Hanover. OK?"

"OK," she said. She watched him go out the door, saw him wave before he stepped into the elevator. She had never felt so close to him, never so much in love and if someone had told her she would not see Michael again until three years passed, she would not have been able to bear the anguish of it.

**************

When Michael got out of the cab in front of the French Hospital he was surprised to see that the street was completely deserted. When he entered the hospital he was even more surprised to find the lobby empty. Damn it, what the hell were Clemenza and Tessio doing? Sure, they never went to West Point but they knew enough about tactic to have outposts. A couple of their men should have been in the lobby at least.

Even the latest visitors had departed, it was almost ten-thirty at night. Michael was tense and alert now. He didn't bother to stop at the information desk, he already knew his father's room number up on the fourth floor. He took the self-service elevator. Oddly enough

nobody stopped him until he reached the nurses' station on the fourth floor. But he strode right past her query and on to his father's room. There was no one outside the door. Where the hell were the two detectives who were supposed to be waiting around to guard and question the old man? Where the hell were Tessio and Clemenza's people? Could there be someone inside the room? But the door was open. Michael went in. There was a figure in the bed and by the December moonlight straining through the window Michael could see his father's face. Even now it was impassive, the chest heaved shallowly with his uneven breath. Tubes hung from steel gallows beside the bed and ran into his nose. On the floor was a glass jar receiving the poisons emptied from his stomach by other tubes. Michael stayed there for a few moments to make sure his father was all right, then backed out of the room.

He told the nurse, "My name is Michael Corleone, I just want to sit with my father. What happened to the detectives who were supposed to be guarding him?"

The nurse was a pretty young thing with a great deal of confidence in the power of her office. "Oh, your father just had too many visitors, it interfered with the hospital service," she said. "The police came and made them all leave about ten minutes ago. And then just five minutes ago I had to call the detectives to the phone for an emergency alarm from their headquarters, and then they left too. But don't worry, I look in on your father often and I can hear any sound from his room. That's why we leave the doors open."

"Thank you," Michael said. "I'll sit with him for a little while. OK?"

She smiled at him. "Just for a little bit and then I'm afraid you'll have to leave. It's the rules, you know."

Michael went back into his father's room. He took the phone from its cradle and got the hospital operator to give him the house in Long Beach, the phone in the corner office room. Sonny answered. Michael whispered, "Sonny, I'm down at the hospital, I came down late. Sonny, there's nobody here. None of Tessio's people. No detectives at the door. The old man was completely unprotected." His voice was trembling.

There was a long silence and then Sonny's voice came, low and impressed, "This is Sollozzo's move you were talking about."

Michael said, "That's what I figured too. But how did he get the cops to clear everybody out and where did they go? What happened to Tessio's men? Jesus Christ, has that bastard Sollozzo got the New York Police Department in his pocket too?"

"Take it easy, kid." Sonny's voice was soothing. "We got lucky again with you going to visit the hospital so late. Stay in the old man's room. Lock the door from the inside. I'll have some men there inside of fifteen minutes, soon as I make some calls. Just sit tight and don't panic. OK, kid?"

"I won't panic," Michael said. For the first time since it had all started he felt a furious anger rising in him, a cold hatred for his father's enemies.

He hung up the phone and rang the buzzer for the nurse. He decided to use his own judgment and disregard Sonny's orders. When the nurse came in he said, "I don't want you to get frightened, but we have to move my father right away. To another room or another floor. Can you disconnect all these tubes so we can wheel the bed out?"

The nurse said, "That's ridiculous. We have to get permission from the doctor."

Michael spoke very quickly. "You've read about my father in the papers. You've seen that there's no one here tonight to guard him. Now I've just gotten word some men will come into the hospital to kill him. Please believe me and help me." He-could be extraordinarily persuasive when he wanted to be.

The nurse said, "We don't have to disconnect the tubes. We can wheel the stand with the bed."

"Do you have an empty room?" Michael whispered. "At the end of the hall," the nurse said.

It was done in a matter of moments, very quickly and very efficiently. Then Michael said to the nurse, "Stay here with him until help comes. If you're outside at your station you might get hurt."

At that moment he heard his father's voice from the bed, hoarse but full of strength, "Michael, is it you? What happened, what is it?"

Michael leaned over the bed. He took his father's hand in his. "It's Mike," he said. "Don't be afraid. Now listen, don't make any noise at all, especially if somebody calls out your name. Some people want to kill you, understand? But I'm here so don't be afraid."

Don Corleone, still not fully conscious of what had happened to him the day before, in terrible pain, yet smiled benevolently on his youngest son, wanting to tell him, but it was too much effort, "Why should I be afraid now? Strange men have come to kill me ever since I was twelve years old."

# Chapter 10

The hospital was small and private with just one entrance. Michael looked through the window down into the street. There was a curved courtyard that had steps leading down into the street and the street was empty of cars. But whoever came into the hospital would have to come through that entrance. He knew he didn't have much time so he ran out of the room and down the four flights and through the wide doors of the ground floor entrance. Off to the side he saw the ambulance yard and there was no car there, no ambulances either.

Michael stood on the sidewalk outside the hospital and lit a cigarette. He unbuttoned his coat and stood in the light of a lamppost so that his features could be seen. A young man was walking swiftly down from Ninth Avenue, a package under his arm. The young man wore a

combat jacket and had a heavy shock of black hair. His face was familiar when he came under the lamplight but Michael could not place it. But the young man stopped in front of him and put out his hand, saying in a heavy Italian accent, "Don Michael, do you remember me? Enzo, the baker's helper to Nazorine the Paniterra; his son-in-law. Your father saved my life by getting the government to let me stay in America."

Michael shook his hand. He remembered him now.

Enzo went on, "I've come to pay my respects to your father. Will they let me into the hospital so late?"

Michael smiled and shook his head. "No, but thanks anyway. I'll tell the Don you came." A car came roaring down the street and Michael was instantly alert. He said to Enzo, "Leave here quickly. There may be trouble. You don't want to get involved with the police."

He saw the look of fear on the young Italian's face. Trouble with the police might mean being deported or refusal of citizenship. But the young man stood fast. He whispered in Italian. "If there's trouble I'll stay to help. I owe it to the Godfather."

Michael was touched. He was about to tell the young man to go away again, but then he thought, why not let him stay? Two men in front of the hospital might scare off any of Sollozzo's crew sent to do a job. One man almost certainly would not. He gave Enzo a cigarette and lit it for him. They both stood under the lamppost is the cold December night. The yellow panes of the hospital, bisected by the greens of Christmas decorations, twinkled down on them. They had almost finished their cigarettes when a long low black car turned into 30th Street from Ninth Avenue and cruised toward them, very close to the curb. It almost stopped. Michael peered to see their faces inside, his body flinching involuntarily. The car seemed about to stop, then speeded forward. Somebody had recognized him. Michael gave Enzo another cigarette and noticed that the baker's hands were shaking. To his surprise his own hands were steady.

They stayed in the street smoking for what was no more than ten minutes when suddenly the night air was split by a police siren. A patrol car made a screaming turn from Ninth Avenue and pulled up in front of the hospital. Two more squad cars followed right behind it. Suddenly the hospital entranceway was flooded with uniformed police and detectives. Michael heaved a sigh of relief. Good old Sonny must have gotten through right away. He moved forward to meet them.

Two huge, burly policemen grabbed his arms. Another frisked him. A massive police captain, gold braid on his cap, came up the steps, his men parting respectfully to leave a path. He was a vigorous man for his girth and despite the white hair that peeked out of his cap. His face was beefy red. He came up to Michael and said harshly, "I thought I got all you guinea hoods locked up. Who the hell are you and what are you doing here?"

One of the cops standing beside Michael said, "He's clean, Captain."

Michael didn't answer. He was studying this police captain, coldly searching his face, the

metallic blue eyes. A detective in plain clothes said, "That's Michael Corleone, the Don's son."

Michael said quietly, "What happened to the detectives who were supposed to be guarding my father? Who pulled them off that detail?"

The police captain was choleric with rage. "You fucking hood, who the hell are you to tell me my business? I pulled them off. I don't give a shit how many dago gangsters kill each other. If it was up to me, I wouldn't lift a finger to keep your old man from getting knocked off. Now get the hell out of here. Get out of this street, you punk, and stay out of this hospital when it's not visiting hours."

Michael was still studying him intently. He was not angry at what this police captain was saying. His mind was racing furiously. Was it possible that Sollozzo had been in that first car and had seen him standing in front of the hospital? Was it possible that Sollozzo had then called this captain and said, "How come the Corleones' men are still around the hospital when I paid you to lock them up?" Was it possible that all had been carefully planned as Sonny had said? Everything fitted in. Still cool, he said to the captain, "I'm not leaving this hospital until you put guards around my father's room."

The captain didn't bother answering. He said to the detective standing beside him, "Phil, lock this punk up."

The detective said hesitantly, "The kid is clean, Captain. He's a war hero and he's never been mixed up in the rackets. The papers could make a stink."

The captain started to turn on the detective, his face red with fury. He roared out, "Goddamn it, I said lock him up."

Michael, still thinking clearly, not angry, said with deliberate malice, "How much is the Turk paying you to set my father up, Captain?"

The police captain turned to him. He said to the two burly patrolmen, "Hold him." Michael felt his arms pinned to his sides. He saw the captain's massive fist arching toward his face. He tried to weave away but the fist caught him high on the cheekbone. A grenade exploded in his skull. His mouth filled with blood and small hard bones that he realized were his teeth. He could feel the side of his head puff up as if it were filling with air. His legs were weightless and he would have fallen if the two policemen had not held him up. But he was still conscious. The plainclothes detective had stepped in front of him to keep the captain from hitting him again and was saying, "Jesus Christ, Captain, you really hurt him."

The captain said loudly, "I didn't touch him. He attacked me and he fell. Do you understand that? He resisted arrest."

Through a red haze Michael could see more cars pulling up to the curb. Men were getting out. One of them he recognized as Clemenza's lawyer, who was now speaking to the police captain, suavely and surely. "The Corleone Family has hired a firm of private detectives to

guard Mr. Corleone. These men with me are licensed to carry firearms, Captain. If you arrest them, you'll have to appear before a judge in the morning and tell him why."

The lawyer glanced at Michael. "Do you want to prefer charges against whoever did this to you?" he asked.

Michael had trouble talking. His jaws wouldn't come together but he managed to mumble. "I slipped," he said. "I slipped and fell." He saw the captain give him a triumphant glance and he tried to answer that glance with a smile. At all costs he wanted to hide the delicious icy chilliness that controlled his brain, the surge of wintry cold hatred that pervaded his body. He wanted to give no warning to anyone in this world as to how he felt at this moment. As the Don would not. Then he felt himself carried into the hospital and he lost consciousness.

When he woke up in the morning he found that his jaw had been wired together and that four of his teeth along the left side of his mouth were missing. Hagen was sitting beside his bed.

"Did they drug me up?" Michael asked.

"Yeah," Hagen said. "They had to dig some bone fragments out of your gums and they figured it would be too painful. Besides you were practically out anyway."

"Is there anything else wrong with me?" Michael asked.

"No," Hagen said. "Sonny wants you out at the Long Beach house. Think you can make it?"

"Sure," Michael said. "Is the Don all right?"

Hagen flushed. "I think we've solved the problem now. We have a firm of private detectives and we have the whole area loaded. I'll tell you more when we get in the car."

Clemenza was driving, Michael and Hagen sat in the back. Michael's head throbbed. "So what the hell really happened last night, did you guys ever find out?"

Hagen spoke quietly. "Sonny has an inside man, that Detective Phillips who tried to protect you. He gave us the scoop. The police captain, McCluskey, is a guy who's been on the take very heavy ever since he's been a patrolman. Our Family has paid him quite a bit. And he's greedy and untrustworthy to do business with. But Sollozzo must have paid him a big price. McCluskey had all Tessio's men around and in the hospital arrested right after visiting hours. It didn't help that some of them were carrying guns. Then McCluskey pulled the official guard detectives off the Don's door. Claimed he needed them and that some other cops were supposed to go over and take their place but they got their assignments bollixed. Baloney. He was paid off to set the Don up. And Phillips said he's the kind of guy who'll try it again. Sollozzo must have given him a fortune for openers and promised him the moon to come."

"Was my getting hurt in the papers?"

"No," Hagen said. "We kept that quiet. Nobody wants that known. Not the cops. Not us." "Good," Michael said. "Did that boy Enzo get away?"

"Yeah," Hagen said. "He was smarter than you. When the cops came he disappeared. He claims he stuck with you while Sollozzo's car went by. Is that true?"

"Yeah," Michael said. "He's a good kid."

"He'll be taken care of," Hagen said. "You feeling OK?" His face was concerned. "You look lousy."

"I'm OK," Michael said. "What was that police captain's name?"

"McCluskey," Hagen said. "By the way, it might make you feel better to know that the Corleone Family finally got up on the scoreboard. Bruno Tattaglia, four o'clock this morning."

Michael sat up. "How come? I thought we were supposed to sit tight."

Hagen shrugged. "After what happened at the hospital Sonny got hard. The button men are out all over New York and New Jersey. We made the list last night. I'm trying to hold Sonny in, Mike. Maybe you can talk to him. This whole business can still be settled without a major war."

"I'll talk to him," Michael said. "Is there a conference this morning?"

"Yeah," Hagen said. "Sollozzo finally got in touch and wants to sit down with us. A negotiator is arranging the details. That means we win. Sollozzo knows he's lost and he wants to get out with his life." Hagen paused. "Maybe he thought we were soft, ready to be taken, because we didn't strike back. Now with one of the Tattaglia sons dead he knows we mean business. He really took an awful gamble bucking the Don. By the way, we got the confirmation on Luca. They killed him the night before they shot your father. In Bruno's nightclub. Imagine that?"

Michael said, "No wonder they caught him off guard."

**************

At the houses in Long Beach the entrance to the mall was blocked by a long black car parked across its mouth. Two men leaned against the hood of the car. The two houses on each side, Michael noticed, had opened windows on their upper floors. Christ, Sonny must really mean business.

Clemenza parked the car outside the mall and they walked inside it. The two guards were

Clemenza's men and he gave them a frown of greeting that served as a salute. The men nodded their heads in acknowledgment. There were no smiles, no greetings. Clemenza led Hagen and Michael Corleone into the house.

The door was opened by another guard before they rang. He had obviously been watching from a window. They went to the corner office and found Sonny and Tessio waiting for them. Sonny came to Michael, took his younger brother's head in his hands and said kiddingly, "Beautiful. Beautiful." Michael knocked his hands away, and went to the desk and poured himself some scotch, hoping it would dull the ache in his wired jaw.

The five of them sat around the room but the atmosphere was different from their earlier meetings. Sonny was gayer, more cheerful, and Michael realized what that gaiety meant. There were no longer any doubts in his older brother's mind. He was committed and nothing would sway him. The attempt by Sollozzo the night before was the final straw. There could no longer be any question of a truce.

"We got a call from the negotiator while you were gone," Sonny said to Hagen. "The Turk wants a meeting now." Sonny laughed. "The balls on that son of a bitch," he said admiringly. "After he craps out last night he wants a meeting today or the next day. Meanwhile we're supposed just to lay back and take everything he dishes out. What fucking nerve."

Tom asked cautiously, "What did you answer?"

Sonny grinned. "I said sure, why not? Anytime he says, I'm in no hurry. I've got a hundred button men out on the street twenty-four hours a day. If Sollozzo shows one hair on his asshole he's dead. Let them take all the time they want."

Hagen said, "Was there a definite proposal?"

"Yeah," Sonny said. "He wants us to send Mike to meet him to hear his proposition. The negotiator guarantees Mike's safety. Sollozzo doesn't ask us to guarantee his safety, he knows he can't ask that. No point. So the meeting will be arranged on his side. His people will pick Mike up and take Mike to the meeting place. Mike will listen to Sollozzo and then they'll turn him loose. But the meeting place is secret. The promise is the deal will be so good we can't turn it down."

Hagen asked, "What about the Tattaglias? What will they do about Bruno?"

"That's part of the deal. The negotiator says the Tattaglia Family has agreed to go along with Sollozzo. They'll forget about Bruno Tattaglia. He pays for what they did to my father. One cancels out the other." Sonny laughed again. "The nervy bastards."

Hagen said cautiously, "We should hear what they have to say."

Sonny shook his head from side to side. "No, no, *Consigliere*, not this time." His voice held a faint trace of Italian accent. He was consciously mocking his father just to kid around. "No more meetings. No more discussions. No more Sollozzo tricks. When the negotiator

gets in touch with us again for our answer I want you to give him one message. I want Sollozzo. If not, it's all-out war. We'll go to the mattresses and we'll put all the button men out on the street. Business will just have to suffer."

"The other Families won't stand for an all-out war," Hagen said. "It puts too much heat on everybody."

Sonny shrugged. "They have a simple solution. Give me Sollozzo. Or fight the Corleone Family." Sonny paused, then said roughly, "No more advice on how to patch it up, Tom. The decision is made. Your job is to help me win. Understand?"

Hagen bowed his head. He was deep in thought for a moment. Then he said, "I spoke to your contact in the police station. He says that Captain McCluskey is definitely on Sollozzo's payroll and for big money. Not only that, but McCluskey is going to get a piece of the drug operation. McCluskey has agreed to be Sollozzo's bodyguard. The Turk doesn't poke his nose out of his hole without McCluskey. When he meets Mike for the conference, McCluskey will be sitting beside him. In civilian clothes but carrying his gun. Now what you have to understand, Sonny, is that while Sollozzo is guarded like this, he's invulnerable. Nobody has ever gunned down a New York police captain and gotten away with it. The heat in this town would be unbearable what with the newspapers, the whole police department, the churches, everything. That would be disastrous. The Families would be after you. The Corleone Family would become outcasts. Even the old man's political protection would run for cover. So take that into consideration."

Sonny shrugged. "McCluskey can't stay with the Turk forever. We'll wait."

Tessio and Clemenza were puffing on their cigars uneasily, not daring to speak, but sweating. It would be their skins that would go on the line if the wrong decision was made.

Michael spoke for the first time. He asked Hagen, "Can the old man be moved out of the hospital onto the mall here?"

Hagen shook his head. "That's the first thing I asked. Impossible. He's in very bad shape. He'll pull through but he needs all kinds of attention, maybe some more surgery. Impossible."

"Then you have to get Sollozzo right away," Michael said. "We can't wait. The guy is too dangerous. He'll come up with some new idea. Remember, the key is still that he gets rid of the old man. He knows that. OK, he knows that now it's very tough so he's willing to take defeat for his life. But if he's going to get killed anyway, he'll have another crack at the Don. And with that polite captain helping him who knows what the hell might happen. We can't take that chance. We have to get Sollozzo right away."

Sonny was scratching his chin thoughtfully. "You're right, kid," he said. "You got right to the old nuts. We can't let Sollozzo get another crack at the old man."

Hagen said quietly, "What about Captain McCluskey?"

Sonny turned to Michael with an odd little smile. "Yeah, kid, what about that tough police captain?"

Michael said slowly, "OK, it's an extreme. But there are times when the most extreme measures are justified. Let's think now that we have to kill McCluskey. The way to do it would be to have him heavily implicated so that it's not an honest police captain doing his duty but a crooked police official mixed up in the rackets who got what was coming to him, like any crook. We have newspaper people on our payroll we can give that story to with enough proof so that they can back it up. That should take some of the heat off. How does that sound?" Michael looked around deferentially to the others. Tessio and Clemenza had gloomy faces and refused to speak. Sonny said with the same odd smile, "Go on, kid, you're doing great. Out of the mouths of infants, as the Don always used to say. Go ahead, Mike, tell us more."

Hagen was smiling too a little and averting his head. Michael flushed. "Well, they want me to go to a conference with Sollozzo. It will be me, Sollozzo and McCluskey all on our own. Set up the meeting for two days from now, then get our informers to find out where the meeting will be held. Insist that it has to be a public place, that I'm not going to let them take me into any apartments or houses. Let it be a restaurant or a bar at the height of the dinner hour, something like that, so that I'll feel safe. They'll feel safe too. Even Sollozzo won't figure that we'll dare to gun the captain. They'll frisk me when I meet them so I'll have to be clean then, but figure out a way you can get a weapon to me while I'm meeting them. Then I'll take both of them."

All four heads turned and stared at him. Clemenza and Tessio were gravely astonished. Hagen looked a little sad but not surprised. He started to speak and thought better of it. But Sonny, his heavy Cupid's face twitching with mirth, suddenly broke out in loud roars of laughter. It was deep belly laughter, not faking. He was really breaking up. He pointed a finger at Michael, trying to speak through gasps of mirth. "You, the high-class college kid, you never wanted to get mixed up in the Family business. Now you wanta kill a police captain and the Turk just because you got your face smashed by McCluskey. You're taking it personal, it's just business and you're taking it personal. You wanta kill these two guys just because you got slapped in the face. It was all a lot of crap. All these years it was just a lot of crap."

Clemenza and Tessio, completely misunderstanding, thinking that Sonny was laughing at his young brother's bravado for making such an offer, were also smiling broadly and a little patronizingly at Michael. Only Hagen warily kept his face impassive.

Michael looked around at all of them, then stared at Sonny, who still couldn't stop laughing*. "You'll* take both of them?" Sonny said. "Hey, kid, they won't give you medals, they put you in the electric chair. You know that? This is no hero business, kid, you don't shoot people from a mile away. You shoot when you see the whites of their eyes like we got taught in school, remember? You gotta stand right next to them and blow their heads off and their brains get all over your nice Ivy League suit. How about that, kid, you wanta do that just because some dumb cop slapped you around?" He was still laughing.

Michael stood up. "You'd better stop laughing," he said. The change in him was so extraordinary that the smiles vanished from the faces of Clemenza and Tessio. Michael was not tall or heavily built but his presence seemed to radiate danger. In that moment he was a reincarnation of Don Corleone himself. His eyes had gone a pale tan and his face was bleached of color. He seemed at any moment about to fling himself on his older and stronger brother. There was no doubt that if he had had a weapon in his hands Sonny would have been in danger. Sonny stopped laughing, and Michael said to him in a cold deadly voice, "Don't you think I can do it, you son of a bitch?"

Sonny had got over his laughing fit. "I know you can do it," he said. "I wasn't laughing at what you said. I was just laughing at how funny things turn out. I always said you were the toughest one in the Family, tougher than the Don himself. You were the only one who could stand off the old man. I remember you when you were a kid. What a temper you had then. Hell, you even used to fight me and I was a lot older than you. And Freddie had to beat the shit out of you at least once a week. And now Sollozzo has you figured for the soft touch in the Family because you let McCluskey hit you without fighting back and you wouldn't get mixed up in the Family fights. He figures he got nothing to worry about if he meets you head to head. And McCluskey too, he's got you figured for a yellow guinea." Sonny paused and then said softly, "But you're a Corleone after all, you son of a bitch. And I was the only one who knew it. I've been sitting here waiting for the last three days, ever since the old man got shot, waiting for you to crack out of that Ivy League, war hero bullshit character you've been wearing. I've been waiting for you to become my right arm so we can kill those fucks that are trying to destroy our father and our Family. And all it took was a sock on the jaw. How do you like that?" Sonny made a comical gesture, a punch, and repeated, "How do you like that?"

The tension had relaxed in the room. Mike shook his head. "Sonny, I'm doing it because it's the only thing to do. I can't give Sollozzo another crack at the old man. I seem to be the only one who can get close enough to him. And I figured it out. I don't think you can get anybody else to knock off a police captain. Maybe you would do it, Sonny, but you have a wife and kids and you have to run the Family business until the old man is in shape. So that leaves me and Freddie. Freddie is in shock and out of action. Finally that leaves just me. It's all logic. The sock on the jaw had nothing to do with it."

Sonny came over and embraced him. "I don't give a damn what your reasons are, just so long as you're with us now. And I'll tell you another thing, you're right all the way. Tom, what's your say?"

Hagen shrugged. "The reasoning is solid. What makes it so is that I don't think the Turk is sincere about a deal. I think he'll still try to get at the Don. Anyway on his past performance that's how we have to figure him. So we try to get Sollozzo. We get him even if we have to get the police captain. But whoever does the job is going to get an awful lot of heat. Does it have to be Mike?"

Sonny said softly, "I could do it."

Hagen shook his head impatiently. "Sollozzo wouldn't let you get within a mile of him if he had ten police captains. And besides you're the acting head of the Family. You can't be risked." Hagen paused and said to Clemenza and Tessio, "Do either one of you have a top button man, someone really special, who would take on this job? He wouldn't have to worry about money for the rest of his life."

Clemenza spoke first. "Nobody that Sollozzo wouldn't know, he'd catch on right away. He'd catch on if me or Tessio went too."

Hagen said, "What about somebody really tough who hasn't made his rep yet, a good rookie?"

Both *caporegimes* shook their heads. Tessio smiled to take the sting out of his words and said, "That's like bringing a guy up from the minors to pitch the World Series."

Sonny broke in curtly, "It has to be Mike. For a million different reasons. Most important they got him down as faggy. And he can do the job, I guarantee that, and that's important because this is the only shot we'll get at that sneaky bastard Turk. So now we have to figure out the best way to back him up. Tom, Clemenza, Tessio, find out where Sollozzo will take him for the conference, I don't care how much it costs. When we find that out we can figure out how we can get a weapon into his hands. Clemenza, I want you to get him a really 'safe' gun out of your collection, the 'coldest' one you got. Impossible to trace. Try to make it short barrel with a lot of blasting power. It doesn't have to be accurate. He'll be right on top of them when he uses it. Mike, as soon as you've used the gun, drop it on the floor. Don't be caught with it on you. Clemenza, tape the barrel and the trigger with that special stuff you got so he won't leave prints. Remember, Mike, we can square everything, witnesses, and so forth, but if they catch you with the gun on you we can't square that. We'll have transportation and protection and then we'll make you disappear for a nice long vacation until the heat wears off. You'll be gone a long time, Mike, but I don't want you saying good-bye to your girl friend or even calling her. After it's all over and you're out of the country I'll send her word that you're OK. Those are orders." Sonny smiled at his brother. "Now stick with Clemenza and get used to handling the gun he picks out for you. Maybe even practice a little. We'll take care of everything else. Everything. OK, kid?"

Again Michael Corleone felt that delicious refreshing chilliness all over his body. He said to his brother, "You didn't have to give me that crap about not talking to my girl friend about something like this. What the hell did you think I was going to do, call her up to say good-bye?"

Sonny said hastily, "OK, but you're still a rookie so I spell things out. Forget it."

Michael said with a grin, "What the hell do you mean, a rookie? I listened to the old man just as hard as you did. How do you think I got so smart?" They both laughed.

Hagen poured drinks for everyone. He looked a little glum. The statesman forced to go to war, the lawyer forced to go to law. "Well, anyway, now we know what we're going to do," he said.

# Chapter 11

Captain Mark McCluskey sat in his office fingering three envelopes bulging with betting slips. He was frowning and wishing he could decode the notations on the slips. It was very important that he do so. The envelopes were the betting slips that his raiding parties had picked up when they had hit one of the Corleone Family bookmakers the night before. Now the bookmaker would have to buy back the slips so that players couldn't claim winners and wipe him out.

It was very important for Captain McCluskey to decode the slips because he didn't want to get cheated when he sold the slips back to the bookmaker. If there was fifty grand worth of action, then maybe he could sell it back for five grand. But if there were a lot of heavy bets and the slips represented a hundred grand or maybe even two hundred grand, then the price should be considerably higher. McCluskey fiddled with the envelopes and then decided to let the bookie sweat a little bit and make the first offer. That might tip off what the real price should be.

McCluskey looked at the station house clock on the wall of his office. It was time for him to pick up that greasy Turk, Sollozzo,and take him to wherever he was going to meet the Corleone Family. McCluskey went over to his wall locker and started to change into his civilian clothes. When he was finished he called his wife and told her he would not be home for supper that night, that he would be out on the job. He never confided in his wife on anything. She thought they lived the way they did on his policeman's salary. McCluskey grunted with amusement. His mother had thought the same thing but he had learned early. His father had shown him the ropes.

His father had been a police sergeant, and every week father and son had walked through the precinct and McCluskey Senior had introduced his six-year-old son to the storekeepers, saying, "And this is my little boy."

The storekeepers would shake his hand and compliment him extravagantly and ring open their cash registers to give the little boy a gift of five or ten dollars. At the end of the day, little Mark McCluskey would have all the pockets of his suit stuffed with paper money, would feel so proud that his father's friends liked him well enough to give him a present every month they saw him. Of course his father put the money in the bank for him, for his college education, and little Mark got at most a fifty-cent piece for himself.

Then when Mark got home and his policemen uncles asked him what he wanted to be when he grew up and he would lisp childishly, "A policeman," they would all laugh uproariously. And of course later on, though his father wanted him to go to college first, he went right from high school to studying for the police force.

He had been a good cop, a brave cop. The tough young punks terrorizing street corners fled when he approached and finally vanished from his beat altogether. He was a very tough cop and a very fair one. He never took his son around to the storekeepers to collect his money presents for ignoring garbage violations and parking violations; he took the money

directly into his own hand, direct because he felt he earned it. He never ducked into a movie house or goofed off into restaurants when he was on foot patrol as some of the other cops did, especially on winter nights. He always made his rounds. He gave his stores a lot of protection, a lot of service. When winos and drunks filtered up from the Bowery to panhandle on his beat he got rid of them so roughly that they never came back. The tradespeople in his precinct appreciated it. And they showed their appreciation.

He also obeyed the system. The bookies in his precinct knew he would never make trouble to get an extra payoff for himself, that he was content with his share of the station house bag. His name was on the list with the others and he never tried to make extras. He was a fair cop who took only clean graft and his rise in the police department was steady if not spectacular.

During the time he was raising a large family of four sons, none of whom became policemen. They all went to Fordham University and since by that time Mark McCluskey was rising from sergeant to lieutenant and finally to captain, they lacked for nothing. It was at this time that McCluskey got the reputation for being a hard bargainer. The bookmakers in his district paid more protection money than the bookmakers in any other part of the city, but maybe that was because of the expense of putting four boys through college.

McCluskey himself felt there was nothing wrong with clean graft. Why the hell should his kids go to CCNY or a cheap Southern college just because the Police Department didn't pay its people enough money to live on and take care of their families properly? He protected all these people with his life and his record showed his citations for gun duels with stickup men on his beat, strong-arm protection guys, would-be pimps. He had hammered them into the ground. He had kept his little corner of the city safe for ordinary people and he sure as hell was entitled to more than his lousy one C note a week. But he wasn't indignant about his low pay, he understood that everybody had to take care of themselves.

Bruno Tattaglia was an old friend of his. Bruno had gone to Fordham with one of his sons and then Bruno had opened his nightclub and whenever the McCluskey family spent an infrequent night on the town, they could enjoy the cabaret with liquor and dinner--- on the house. On New Year's Eve they received engraved invitations to be guests of the management and always received one of the best tables. Bruno always made sure they were introduced to the celebrities who performed in his club, some of them famous singers and Hollywood stars. Of course sometimes he asked a little favor, like getting an employee with a record cleared for a cabaret work license, usually a pretty girl with a police dossier as a hustler or roller. McCluskey would be glad to oblige.

McCluskey made it a policy never to show that he understood what other people were up to. When Sollozzo had approached him with the proposition to leave old man Corleone uncovered in the hospital, McCluskey didn't ask why. He asked price. When Sollozzo said ten grand, McCluskey knew why. He did not hesitate. Corleone was one of the biggest Mafia men in the country with more political connections than Capone had ever had. Whoever knocked him off would be doing the country a big favor. McCluskey took the money in advance and did the job. When he received a call from Sollozzo that there were still two of Corleone's men in front of the hospital he had flown into a rage. He had locked up all of Tessio's men, he had pulled the detective guards off the door of Corleone's hospital

room. And now, being a man of principle, he would have to give back the ten grand, money he had already earmarked to insure the education of his grandchildren. It was in that rage that he had gone to the hospital and struck Michael Corleone.

But it had all worked out for the best. He had met with Sollozzo in the Tattaglia nightclub and they had made an even better deal. Again McCluskey didn't ask questions, since he knew all the answers. He just made sure of his price. It never occurred to him that he himself could be in any danger. That anyone would consider even for a moment killing a New York City police captain was too fantastic. The toughest hood in the Mafia had to stand still if the lowliest patrolman decided to slap him around. There was absolutely no percentage in killing cops. Because then all of a sudden a lot of hoods were killed resisting arrest or escaping the scene of a crime, and who the hell was going to do anything about that?

McCluskey sighed and got ready to leave the station house. Problems, always problems. His wife's sister in Ireland had just died after many years of fighting cancer and that cancer had cost him a pretty penny. Now the funeral would cost him more. His own uncles and aunts in the old country needed a little help now and then to keep their potato farms and he sent the money to do the trick. He didn't begrudge it. And when he and his wife visited the old country they were treated like a king and queen. Maybe they would go again this summer now that the war was over and with all this extra money coming in. McCluskey told his patrolman clerk where he would be if he was needed. He did not feel it necessary to take any precautions. He could always claim Sollozzo was an informer he was meeting. Outside the station house he walked a few blocks and then caught a cab to the house where he would meet with Sollozzo.

**************

It was Tom Hagen who had to make all the arrangements for Michael's leaving the country, his false passport, his seaman's card, his berth on an Italian freighter that would dock in a Sicilian port. Emissaries were sent that very day by plane to Sicily to prepare a hiding plate with the Mafia chief in the hill country.

Sonny arranged for a car and an absolutely trustworthy driver to be waiting for Michael when he stepped out of the restaurant where the meeting would be held with Sollozzo. The driver would be Tessio himself, who had volunteered for the job. It would be a beat-up-looking car but with a fine motor. It would have phony license plates and the car itself would be untraceable. It had been saved for a special job requiring the best.

Michael spent the day with Clemenza, practicing with the small gun that would be gotten to him. It was a .22 filled with soft-nosed bullets that made pinpricks going in and left insulting gaping holes when they exited from the human body. He found that it was accurate up to five of his steps away from a target. After that the bullets might go anywhere. The trigger was tight but Clemenza worked on this with some tools so that it pulled easier. They decided to leave it noisy. They didn't want an innocent bystander misunderstanding the situation and interfering out of ignorant courage. The report of the gun would keep them away from Michael.

Clemenza kept instructing him during the training session. "Drop the gun as soon as you've finished using it. Just let your hand drop to your side and the gun slip out. Nobody will notice. Everybody will think you're still armed. They'll be staring at your face. Walk out of the place very quickly but don't run. Don't look anybody directly in the eye but don't look away from them either. Remember, they'll be scared of you, believe me, they'll be scared of you. Nobody will interfere. As soon as you're outside Tessio will be in the car waiting for you. Get in and leave the rest to him. Don't be worried about accidents. You'd be surprised how well these affairs go. Now put this hat on and let's see how you look." He clapped a gray fedora on Michael's head. Michael, who never wore a hat, grimaced. Clemenza reassured him. "It helps against identification, just in case. Mostly it gives witnesses an excuse to change their identification when we make them see the light. Remember, Mike, don't worry about prints. The butt and trigger are fixed with special tape. Don't touch any other part of the gun, remember that."

Michael said, "Has Sonny found out where Soliozzo is taking me?"

Clemenza shrugged. "Not yet. Sollozzo is being very careful. But don't worry about him harming you. The negotiator stays in our hands until you come back safe. If anything happens to you, the negotiator pays."

"Why the hell should he stick his neck out?" Michael asked.

"He gets a big fee," Clemenza said. "A small fortune. Also he is an important man in the Families. He knows Sollozzo can't let anything happen to him. Your life is not worth the negotiator's life to Sollozzo. Very simple. You'll be safe all right. We're the ones who catch hell afterwards."

"How bad will it be?" Michael asked.

"Very bad," Clemenza said. "It means an all-out war with the Tattaglia Family against the Corleone Family. Most of the others will line up with the Tattaglias. The Sanitation Department will be sweeping up a lot of dead bodies this winter." He shrugged. "These things have to happen once every ten years or so. It gets rid of the bad blood. And then if we let them push us around on the little things they wanta take over everything. You gotta stop them at the beginning. Like they shoulda stopped Hitler at Munich, they should never let him get away with that, they were just asking for big trouble when they let him get away with that."

Michael had heard his father say this same thing before, only in 1939 before the war actually started. If the Families had been running the State Department there would never have been World War II, he thought with a grin.

They drove back to the mall and to the Don's house, where Sonny still made his headquarters. Michael wondered how long Sonny could stay cooped up in the safe territory of the mall. Eventually he would have to venture out. They found Sonny taking a nap on the couch. On the coffee table was the remains of his late lunch, scraps of steak and bread crumbs and a half-empty bottle of whiskey.

His father's usually neat office was taking on the look of a badly kept furnished room. Michael shook his brother awake and said, "Why don't you stop living like. a bum and get this place cleaned up?"

Sonny yawned. "What the hell are you, inspecting the barracks? Mike, we haven't got the word yet where they plan to take you, those bastards Sollozzo and McCluskey. If we don't find that out, how the hell are we going to get the gun to you?"

"Can't I carry it on me?" Michael asked. "Maybe they won't frisk me and even if they do maybe they'll miss it if we're smart enough. And even if they find it--- so what. They'll just take it off me and no harm done."

Sonny shook his head. "Nah," he said. "We have to make this a sure hit on that bastard Sollozzo. Remember, get him first if you possibly can. McCluskey is slower and dumber. You should have plenty of time to take him. Did Clemenza tell you to be sure to drop the gun?"

"A million times," Michael said.

Sonny got up from the sofa and stretched. "How does your jaw feel, kid?"

"Lousy," Michael said. The left side of his face ached except those parts that felt numb because of the drugged wire holding it together. He took the bottle of whiskey from the table and swigged directly from it. The pain eased.

Sonny said, "Easy, Mike, now is no time to get slowed up by booze."

Michael said, "Oh, Christ, Sonny, stop playing the big brother. I've been in combat against tougher guys than Sollozzo and under worse conditions. Where the hell are his mortars? Has he got air cover? Heavy artillery? Land mines? He's just a wise son of a bitch with a big-wheel cop sidekick. Once anybody makes up their mind to kill them there's no other problem. That's the hard part, making up your mind. They'll never know what hit them."

Tom Hagen came into the room. He greeted them with a nod and went directly to the falsely listed telephone. He called a few times and then shook his head at Sonny. "Not a whisper," he said. "Sollozzo is keeping it to himself as long as he can."

The phone rang. Sonny answered it and he held up a hand as if to signal for quiet though no one had spoken. He jotted some notes down on a pad, then said, "OK, he'll be there," and hung up the phone.

Sonny was laughing. "That son of a bitch Sollozzo, he really is something. Here's the deal. At eight tonight he and Captain McCluskey pick up Mike in front of Jack Dempsey's bar on Broadway. They go someplace to talk, and get this. Mike and Sollozzo talk in Italian so that the Irish cop don't know what the hell they are talking about. He even tells me, don't worry, he knows McCluskey doesn't know one word in Italian unless it's *'soldi'* and he's checked

you out, Mike, and knows you can understand Sicilian dialect." Michael said dryly, "I'm pretty rusty but we won't talk long."

Tom Hagen said, "We don't let Mike go until we have the negotiator. Is that arranged?"

Clemenza nodded. "The negotiator is at my house playing pinochle with three of my men. They wait for a call from me before they let him go."

Sonny sank back in the leather armchair. "Now how the hell do we find out the meeting place? Tom, we've got informers with the Tattaglia Family, how come they haven't given us the word?"

Hagen shrugged. "Sollozzo is really damn smart. He's playing this close to the vest, so close that he's not using any men as a cover. He figures the captain will be enough and that security is more important than guns. He's right too. We'll have to put a tail on Mike and hope for the best."

Sonny shook his head. "Nah, anybody can lose a tail when they really want to. That's the first thing they'll check out."

By this time it was five in the afternoon. Sonny, with a worried look on his face, said, "Maybe we should just let Mike blast whoever is in the car when it tries to pick him up."

Hagen shook his head. "What if Sollozzo is not in the car? We've tipped our hand for nothing. Damn it, we have to find out where Sollozzo is taking him."

Clemenza put in, "Maybe we should start trying to figure why lie's making it such a big secret."

Michael said impatiently, "Because it's the percentage. Why should he let us know anything if he can prevent it? Besides, he smells danger. He must be leery as hell even with that police captain for his shadow."

Hagen snapped his fingers. "That detective, that guy Phillips. Why don't you give him a ring, Sonny? Maybe he can find out where the hell the captain can be reached. It's worth a try. McCluskey won't give a damn who knows where he's going."

Sonny picked up the phone and dialed a number. He spoke softly into the phone, then hung up. "He'll call us back," Sonny said.

They waited for nearly another thirty minutes and then the phone rang. It was Phillips. Sonny jotted something down on his pad and then hung up. His face was taut. "I think we've got it," he said. "Captain McCluskey always has to leave word on where he can be reached. From eight to ten tonight he'll be at the Luna Azure up in the Bronx. Anybody know it?"

Tessio spoke confidently. "I do. It's perfect for us. A small family place with big booths

where people can talk in private. Good food. Everybody minds their own business. Perfect." He leaned over Sonny's desk and arranged stubbed-out cigarettes into map figures. "This is the entrance. Mike, when you finish just walk out and turn left, then turn the corner. I'll spot you and put on my headlights and catch you on the fly. If you have any trouble, yell and I'll try to come in and get you out. Clemenza, you gotta work fast. Send somebody up there to plant the gun. They got an old-fashioned toilet with a space between the water container and the wall. Have your man tape the gun behind there. Mike, after they frisk you in the car and find you're clean, they won't be too worried about you. In the restaurant, wait a bit before you excuse yourself. No, better still, ask permission to go. Act a little in trouble first, very natural. They can't figure anything. But when you come out again, don't waste any time. Don't sit down again at the table, start blasting. And don't take chances. In the head, two shots apiece, and out as fast as your legs can travel."

Sonny had been listening judiciously. "I want somebody very good, very safe, to plant that gun," he told Clemenza. "I don't want my brother coming out of that toilet with just his dick in his hand."

Clemenza said emphatically, "The gun will be there." "OK," Sonny said. "Everybody get rolling."

Tessio and Clemenza left. Tom Hagen said, "Sonny, should I drive Mike down to New York?"

"No," Sonny said. "I want you here. When Mike finishes, then our work begins and I'll need you. Have you got those newspaper guys lined up?"

Hagen nodded. "I'll be feeding them info as soon as things break."

Sonny got up and came to stand in front of Michael. He shook his hand. "OK, kid," he said, "you're on. I'll square it with Mom your not seeing her before you left. And I'll get a message to your girl friend when I think the time is right. OK?"

"OK," Mike said. "How long do you think before I can come back?" "At least a year," Sonny said.

Tom Hagen put in, "The Don might be able to work faster than that, Mike, but don't count on it. The time element hinges on a lot of factors. How well we can plant stories with the newsmen. How much the Police Department wants to cover up. How violently the other Families react. There's going to be a hell of a lot of heat and trouble. That's the only thing we can be sure of."

Michael shook Hagen's hand. "Do your best," he said. "I don't want to do another three-year stretch away from home."

Hagen said gently, "It's not too late to back out, Mike, we can get somebody else, we can

go back over our alternatives. Maybe it's not necessary to get rid of Sollozzo."

Michael laughed. "We can talk ourselves into any viewpoint," he said. "But we figured it right the first time. I've been riding the gravy train all my life, it's about time I paid my dues."

"You shouldn't let that broken jaw influence you," Hagen said. "McCluskey is a stupid man and it was business, not personal."

For the second time he saw Michael Corleone's face freeze into a mask that resembled uncannily the Don's. "Tom, don't let anybody kid you. It's all personal, every bit of business. Every piece of shit every man has to eat every day of his life is personal. They call it business. OK. But it's personal as hell. You know where I learned that from? The Don. My old man. The Godfather. If a bolt of lightning hit a friend of his the old man would take it personal. He took my going into the Marines personal. That's what makes him great. The Great Don. He takes everything personal. Like God. He knows every feather that falls from the tail of a sparrow or however the hell it goes. Right? And you know something? Accidents don't happen to people who take accidents as a personal insult. So I came late, OK, but I'm coming all the way. Damn right, I take that broken jaw personal; damn right, I take Sollozzo trying to kill my father personal." He laughed. "Tell the old man I learned it all from him and that I'm glad I had this chance to pay him back for all he did for me. He was a good father." He paused and then he said thoughtfully to Hagen, "You know, I can never remember him hitting me. Or Sonny. Or Freddie. And of course Connie, he wouldn't even yell at her. And tell me the truth, Tom, how many men do you figure the Don killed or had killed."

Tom Hagen turned away. "I'll tell you one thing you didn't learn from him: talking the way you're talking now. There are things that have to be done and you do them and you never talk about them. You don't try to justify them. They can't be justified. You just do them. Then you forget it."

Michael Corleone frowned. He said quietly, "As the *Consigliere*, you agree that it's dangerous to the Don and our Family to let Sollozzo live?"

"Yes," Hagen said.

"OK," Michael said. "Then I have to kill him."

Michael Corleone stood in front of Jack Dempsey's restaurant on Broadway and waited for his pickup. He looked at his watch. It said five minutes to eight. Sollozzo was going to be punctual. Michael had made sure he was there in plenty of time. He had been waiting fifteen minutes.

All during the ride from Long Beach into the city he had been trying to forget what he had said to Hagen. For if he believed what he said, then his life was set on an irrevocable course. And yet, could it be otherwise after tonight? He might be dead after tonight if he didn't stop all this crap, Michael thought grimly. He had to keep his mind on the business at hand. Sollozzo was no dummy and McCluskey was a very tough egg. He felt the ache in his wired

jaw and welcomed the pain, it would keep him alert.

Broadway wasn't that crowded on this cold winter night, even though it was near theater time. Michael flinched as a long black car pulled up to the curb and the driver, leaning over, opened the front door and said, "Get in, Mike." He didn't know the driver, a young punk with slick black hair and an open shirt, but he got in. In the back seat were Captain McCluskey and Sollozzo.

Sollozzo reached a hand over the back of the seat and Michael shook it. The hand was firm, warm and dry. Sollozzo said, "I'm glad you came, Mike. I hope we can straighten everything out. All this is terrible, it's not the way I wanted things to happen at all. It should never have happened."

Michael Corleone said quietly, "I hope we can settle things tonight, I don't want my father bothered any more."

"He won't be," Sollozzo said sincerely. "I swear to you by my children he won't be. Just keep an open mind when we talk. I hope you're not a hothead like your brother Sonny. It's impossible to talk business with him."

Captain McCluskey grunted. "He's a good kid, he's all right." He leaned over to give Michael an affectionate pat on the shoulder. "I'm sorry about the other night, Mike. I'm getting too old for my job, too grouchy. I guess I'll have to retire pretty soon. Can't stand the aggravation, all day I get aggravation. You know how it is." Then with a doleful sigh, he gave Michael a thorough frisk for a weapon.

Michael saw a slight smile on the driver's lips. The car was going west with no apparent attempt to elude any trailers. It went up on to the West Side Highway, speeding in and out of traffic. Anyone following would have had to do the same. Then to Michael's dismay it took the exit for the George Washington Bridge, they were going over to New Jersey. Whoever had given Sonny the info on where the meeting was to be held had given him the wrong dope.

The car threaded through the bridge approaches and then was on it, leaving the blazing city behind. Michael kept his face impassive. Were they going to dump him into the swamps or was it just a last-minute change in meeting place by the wily Sollozzo? But when they were nearly all the way across, the driver gave the wheel a violent twist. The heavy automobile jumped into the air when it hit the divider and bounced over into the lanes going back to New York City. Both McCluskey and Sollozzo were looking back to see if anyone had tried doing the same thing. The driver was really hitting it back to New York and then they were off the bridge and going toward the East Bronx. They went through the side streets with no cars behind them. By this time it was nearly nine o'clock. They had made sure there was no one on their tail. Sollozzo lit up a cigarette after offering his pack to McCluskey and Michael, both of whom refused. Sollozzo said to the driver, "Nice work. I'll remember it."

Ten minutes later the car pulled up in front of a restaurant in a small Italian neighborhood. There was no one on the streets and because of the lateness of the hour only a few people

were still at dinner. Michael had been worried that the driver would come in with them, but he stayed outside with his car. The negotiator had not mentioned a driver, nobody had. Technically Sollozzo had broken the agreement by bringing him along. But, Michael decided not to mention it, knowing they would think he would be afraid to mention it, afraid of ruining the chances for the success of the parley.

The three of them sat at the only round table, Sollozzo refusing a booth. There were only two other people in the restaurant. Michael wondered whether they were Sollozzo plants. But it didn't matter. Before they could interfere it would be all over.

McCluskey asked with real interest, "Is the Italian food good here?"

Sollozzo reassured him. "Try the veal, it's the finest in New York." The solitary waiter had brought a bottle of wine to the table and uncorked it. He poured three glasses full. Surprisingly McCluskey did not drink. "I must be the only Irishman who don't take the booze," he said. "I seen too many good people get in trouble because of the booze."

Sollozzo said placatingly to the captain, "I am going to talk Italian to Mike, not because I don't trust you but because I can't explain myself properly in English and I want to convince Mike that I mean well, that it's to everybody's advantage for us to come to an agreement tonight. Don't be insulted by this, it's not that I don't trust you."

Captain McCluskey gave them both an ironic grin.."Sure, you two go right ahead," he said. "I'll concentrate on my veal and spaghetti."

Sollozzo began speaking to Michael in rapid Sicilian. He said, "You must understand that what happened between me and your father was strictly a business matter. I have a great respect for Don Corleone and would beg for the opportunity to enter his service. But you must understand that your father is an old-fashioned man. He stands in the way of progress. The business I am in is the coming thing, the wave of the future, there are untold millions of dollars for everyone to make. But your father stands in the way because of certain unrealistic scruples. By doing this he imposes his will on men like myself. Yes, yes, I know, he says to me, 'Go ahead, it's your business,' but we both know that is unrealistic. We must tread on each other's corns. What he is really telling me is that I cannot operate my business. I am a man who respects himself and cannot let another man impose his will on me so what had to happen did happen. Let me say that I had the support, the silent support of all the New York Families. And the Tattaglia Family became my partners. If this quarrel continues, then the Corleone Family will stand alone against everyone. Perhaps if your father were well, it could be done. But the eldest son is not the man the Godfather is, no disrespect intended. And the Irish *Consigliere*, Hagen, is not the man Genco Abbandando was, God rest his soul. So I propose a peace, a truce. Let us cease all hostilities until your father is well again and can take part in these bargainings. The Tattaglia Family agrees, upon my persuasions and my indemnities, to forgo justice for their son Bruno. We will have peace. Meanwhile, I have to make a living and will do a little trading in my business. I do not ask your cooperation but I ask you, the Corleone Family, not to interfere. These are my proposals. I assume you have the authority to agree, to make a deal."

Michael said in Sicilian, "Tell me more about how you propose to start your business, exactly what part my Family has to play in it and what profit we can take from this business."

"You want the whole proposition in detail then?" Sollozzo asked.

Michael said gravely, "Most important of all I must have sure guarantees that no more attempts will be made on my father's life."

Sollozzo raised his hand expressively. "What guarantees can I give you? I'm the hunted one. I've missed my chance. You think too highly of me, my friend. I am not that clever."

Michael was sure now that the conference was only to gain a few days' time. That Sollozzo would make another attempt to kill the Don. What was beautiful was that the Turk was underrating him as a punk kid. Michael felt that strange delicious chill filling his body. He made his face look distressed. Sollozzo asked sharply, "What is it?"

Michael said with an embarrassed air, "The wine went right to my bladder. I've been holding it in. Is it all right if I go to the bathroom?"

Sollozzo was searching his face intently with his dark eyes. He reached over and roughly thrust his hand in Michael's crotch, under it and around, searching for a weapon. Michael looked offended. McCluskey said curtly, "I frisked him. I've frisked thousands of young punks. He's clean."

Sollozzo didn't like it. For no reason at all he didn't like it. He glanced at the man sitting at a table opposite them and raised his eyebrows toward the door of the bathroom. The man gave a slight nod that he had checked it, that there was nobody inside. Sollozzo said reluctantly, "Don't take too long." He had marvelous antenna, he was nervous.

Michael got up and went into the bathroom. The urinal had a pink bar of soap in it secured by a wire net. He went into the booth. He really had to go, his bowels were loose. He did it very quickly, then reached behind the enamel water cabinet until his hand touched the small, blunt-nosed gun fastened with tape. He ripped the gun loose, remembering that Clemenza had said not to worry about leaving prints on the tape. He shoved the gun into his waistband and buttoned his jacket over it. He washed his hands and wet his hair. He wiped his prints off the faucet with his handkerchief. Then he left the toilet.

Sollozzo was sitting directly facing the door of the toilet, his dark eyes blazing with alertness. Michael gave a smile. "Now I can talk," he said with a sigh of relief.

Captain McCluskey was eating the plate of veal and spaghetti that had arrived. The man on the far wall had been stiff with attention, now he too relaxed visibly.

Michael sat down again. He remembered Clemenza had told him not to do this, to come out of the toilet and blaze away. But either out of some warning instinct or sheer funk he had not done so. He had felt that if he had made one swift move he would have been cut down.

Now he felt safe and he must have been scared because he was glad he was no longer standing on his legs. They had gone weak with trembling.

Sollozzo was leaning toward him. Michael, his belly covered by the table, unbuttoned his jacket and listened intently. He could not understand a word the man was saying. It was literally gibberish to him. His mind was so filled with pounding blood that no word registered. Underneath the table his right hand moved to the gun tucked into his waistband and he drew it free. At that moment the waiter came to take their order and Sollozzo turned his head to speak to the waiter. Michael thrust the table away from him with his left hand and his right hand shoved the gun almost against Sollozzo's head. The man's coordination was so acute that he had already begun to fling himself away at Michael's motion. But Michael, younger, his reflexes sharper, pulled the trigger. The bullet caught Sollozzo squarely between his eye and his ear and when it exited on the other side blasted out a huge gout of blood and skull fragments onto the petrified waiter's jacket. Instinctively Michael knew that one bullet was enough. Sollozzo had turned his head in that last moment and he had seen the light of life die in the man's eyes as clearly as a candle goes out.

Only one second had gone by as Michael pivoted to bring the gun to bear on McCluskey. The police captain was staring at Sollozzo with phlegmatic surprise, as if this had nothing to do with him. He did not seem to be aware of his own danger. His veal-covered fork was suspended in his hand and his eyes were just turning on Michael. And the expression on his face, in his eyes, held such confident outrage, as if now he expected Michael to surrender or to run away, that Michael smiled at him as he pulled the trigger. This shot was bad, not mortal. It caught MeCluskey in his thick bull-like throat and he started to choke loudly as if he had swallowed too large a bite of the veal. Then the air seemed to fill with a fine mist of sprayed blood as he coughed it out of his shattered lungs. Very coolly, very deliberately, Michael fired the next shot through the top of his white-haired skull.

The air seemed to be full of pink mist. Michael swung toward the man sitting against the wall. This man had not made a move. He seemed paralyzed. Now he carefully showed his hands on top of the table and looked away. The waiter was staggering back toward the kitchen, an expression of horror on his face, staring at Michael in disbelief. Sollozzo was still in his chair, the side of his body propped up by the table. McCluskey, his heavy body pulling downward, had fallen off his chair onto the floor. Michael let the gun slip out of his hand so that it bound off his body and made no noise. He saw that neither the man against the wall nor the waiter had noticed him dropping the gun. He strode the few steps toward the door and opened it. Sollozzo's car was parked at the curb still, but there was no sign of the driver. Michael turned left and around the corner. Headlights flashed on and a battered sedan pulled up to him, the door swinging open. He jumped in and the car roared away. He saw that it was Tessio at the wheel, his trim features hard as marble.

"Did you do the job on Sollozzo?" Tessio asked.

For that moment Michael was struck by the idiom Tessio had used. It was always used in a sexual sense, to do the job on a woman meant seducing her. It was curious that Tessio used it now. "Both of them," Michael said.

"Sure?" Tessio asked.

"I saw their brains," Michael said.

There was a change of clothes for Michael in the car. Twenty minutes later he was on an Italian freighter slated for Sicily. Two hours later the freighter put out to sea and from his cabin Michael could see the lights of New York City burning like the fires of hell. He felt an enormous sense of relief. He was out of it now. The feeling was familiar and he remembered being taken off the beach of an island his Marine division had invaded. The battle had been still going on but he had received a slight wound and was being ferried back to a hospital ship. He had felt the same overpowering relief then that he felt now. All hell would break loose but he wouldn't be there.

**************

On the day after the murder of Sollozzo and Captain McCluskey, the police captains and lieutenants in every station house in New York City sent out the word: there would be no more gambling, no more prostitution, no more deals of any kind until the murderer of Captain McCluskey was caught. Massive raids began all over the city. All unlawful business activities came to a standstill.

Later that day an emissary from the Families asked the Corleone Family if they were prepared to give up the murderer. They were told that the affair did not concern them. That night a bomb exploded in the Corleone Family mall in Long Beach, thrown from a car that pulled up to the chain, then roared away. That night also two button men of the Corleone Family were killed as they peaceably ate their dinner in a small Italian restaurant in Greenwich Village. The Five Families War of 1946 had begun.

# Book Two Chapter 12

Johnny Fontane waved a casual dismissal to the manservant and said, "See you in the morning, Billy." The colored butler bowed his way out of the huge dining room-living room with its view of the Pacific Ocean. It was a friendly-goodbye sort of bow, not a servant's bow, and given only because Johnny Fontane had company for dinner.

Johnny's company was a girl named Sharon Moore, a New York City Greenwich Village girl in Hollywood to try for a small part in a movie being produced by an old flame who had made the big time. She had visited the set while Johnny was acting in the Woltz movie. Johnny had found her young and fresh and charming and witty, and had asked her to come to his place for dinner that evening. His invitations to dinner were always famous and had the force of royalty and of course she said yes.

Sharon Moore obviously, expected him to come on very strong because of his reputation, but Johnny hated the Hollywood "piece of meat" approach. He never slept with any girl unless there was something about her he really liked. Except, of course, sometimes when he

was very drunk and found himself in bed with a girl he didn't even remember meeting or seeing before. And now that he was thirty-five years old, divorced once, estranged from his second wife, with maybe a thousand pubic scalps dangling from his belt, he simply wasn't that eager. But there was something about Sharon Moore that aroused affection in him and so he had invited her to dinner.

He never ate much but he knew young pretty girls ambitiously starved themselves for pretty clothes and were usually big eaters on a date so there was plenty of food on the table. There was also plenty of liquor; champagne in a bucket, scotch, rye, brandy and liqueurs on the sideboard. Johnny served the drinks and the plates of food already prepared. When they had finished eating he led her into the huge living room with its glass wall that looked out onto the Pacific. He put a stack of Ella Fitzgerald records on the hifi and settled on the couch with Sharon. He made a little small talk with her, found out about what she had been like as a kid, whether she had been a tomboy or boy crazy, whether she had been homely or pretty, lonely or gay. He always found these details touching, it always evoked the tenderness he needed to make love.

They nestled together on the sofa, very friendly, very comfortable. He kissed her on the lips, a cool friendly kiss, and when she kept it that way he left it that way. Outside the huge picture window he could see the dark blue sheet of the Pacific lying flat beneath the moonlight.

"How come you're not playing any of your records?" Sharon asked him. Her voice was teasing. Johnny smiled at her. He was amused by her teasing him. "I'm not that Hollywood," he said.

"Play some for me," she said. "Or sing for me. You know, like the movies. I'll bubble up and melt all over you just like those girls do on the screen."

Johnny laughed outright. When he had been younger, he had done just such things and the result had always been stagy, the girls trying to look sexy and melting, making their eyes swim with desire for an imagined fantasy camera. He would never dream of singing to a girl now; for one thing, he hadn't sung for months, he didn't trust his voice. For another thing, amateurs didn't realize how much professionals depended on technical help to sound as good as they did. He could have played his records but he felt the same shyness about hearing his youthful passionate voice as an aging, balding man running to fat feels about showing pictures of himself as a youth in the full bloom of manhood.

"My voice is out of shape," he said. "And honestly, I'm sick of hearing myself sing."

They both sipped their drinks. "I hear you're great in this picture," she said. "Is it true you did it for nothing?"

"Just a token payment," Johnny said.

He got up to give her a refill on her brandy glass, gave her a gold-monogrammed cigarette and flashed his lighter out to hold the light for her. She puffed on the cigarette and sipped her

drink and he sat down beside her again. His glass had considerably more brandy in it than hers, he needed it to warm himself, to cheer himself, to charge himself up. His situation was the reverse of the lover's usual one. He had to get himself drunk instead of the girl. The girl was usually too willing where he was not. The last two years had been hell on his ego, and he used this simple way to restore it, sleeping with a young fresh girl for one night, taking her to dinner a few times, giving her an expensive present and then brushing her off in the nicest way possible so that her feelings wouldn't be hurt. And then they could always say they had had a thing with the great Johnny Fontane. It wasn't true love, but you couldn't knock it if the girl was beautiful and genuinely nice. He hated the hard, bitchy ones, the ones who screwed for him and then rushed off to tell their friends that they'd screwed the great Johnny Fontane, always adding that they'd had better. What amazed him more than anything else in his career were the complaisant husbands who almost told him to his face that they forgave their wives since it was allowed for even the most virtuous matron to be unfaithful with a great singing and movie star like Johnny Fontane. That really floored him.

He loved Ella Fitzgerald on records. He loved that kind of clean singing, that kind of clean phrasing. It was the only thing in life he really understood and he knew he understood it better than anyone else on earth. Now lying back on the couch, the brandy warming his throat, he felt a desire to sing, not music, but to phrase with the records, yet it was something impossible to do in front of a stranger. He put his free hand in Sharon's lap, sipping his drink from his other hand. Without any slyness but with the sensualness of a child seeking warmth, his hand in her lap pulled up the silk of her dress to show milky white thigh above the sheer netted gold of her stockings and as always, despite all the women, all the years, all the familiarity, Johnny felt the fluid sticky warmness flooding through his body at that sight. The miracle still happened, and what would he do when that failed him as his voice had?

He was ready now. He put his drink down on the long inlaid cocktail table and turned his body toward her. He was very sure, very deliberate, and yet tender. There was nothing sly or lecherously lascivious in his caresses. He kissed her on the lips while his hands rose to her breasts. His hand fell to her warm thighs, the skin so silky to his touch. Her returning kiss was warm but not passionate and he preferred it that way right now. He hated girls who turned on all of a sudden as if their bodies were motors galvanized into erotic pumpings by the touching of a hairy switch.

Then he did something he always did, something that had never yet failed to arouse him. Delicately and as lightly as it was possible to do so and still feel something, he brushed the tip of his middle finger deep down between her thighs. Some girls never even felt that initial move toward lovemaking. Some were distracted by it, not sure it was a physical touch because at the same time he always kissed them deeply on the mouth. Still others seemed to suck in his finger or gobble it up with a pelvic thrust. And of course before he became famous, some girls had slapped his face. It was his whole technique and usually it served him well enough.

Sharon's reaction was unusual. She accepted it all, the touch, the kiss, then shifted her mouth off his, shifted her body ever so slightly back along the couch and picked up her drink. It was a cool but definite refusal. It happened sometimes. Rarely; but it happened. Johnny picked up his drink and lit a cigarette.

She was saying something very sweetly, very lightly. "It's not that I don't like you, Johnny, you're much nicer than I thought you'd be. And it's not because I'm not that kind of a girl. It's just that I have to be turned on to do it with a guy, you know what I mean?"

Johnny Fontane smiled at her. He still liked her. "And I don't turn you on?"

She was a little embarrassed. "Well, you know, when you were so great singing and all, I was still a little kid. I sort of just missed you, I was the next generation. Honest, it's not that I'm goody-goody. If you were a movie star I grew up on, I'd have my panties off in a second."

He didn't like her quite so much now. She was sweet, she was witty, she was intelligent. She hadn't fallen all over herself to screw for him or try to hustle him because his connections would help her in show biz. She was really a straight kid. But there was something else he recognized. It had happened a few times before. The girl who went on a date with her mind all made up not to go to bed with him, no matter how much she liked him, just so that she could tell her friends, and even more, herself, that she had turned down a chance to screw for the great Johnny Fontane. It was something he understood now that he was older and he wasn't angry. He just didn't like her quite that much and he had really liked her a lot.

And now that he didn't like her quite so much, he relaxed more. He sipped his drink and watched the Pacific Ocean. She said, "I hope you're not sore, Johnny. I guess I'm being square, I guess in Hollywood a girl's supposed to put out just as casually as kissing a beau good night. I just haven't been around long enough."

Johnny smiled at her and patted her cheek. His hand fell down to pull her skirt discreetly over her rounded silken knees. "I'm not sore," he said. "It's nice having an old-fashioned date." Not telling what he felt: the relief at not having to prove himself a great lover, not having to live up to his screened, godlike image. Not having to listen to the girl trying to react as if he really had lived up to that image, making more out of a very simple, routine piece of ass than it really was.

They had another drink, shared a few more cool kisses and then she decided to go. Johnny said politely, "Can I call you for dinner some night?"

She played it frank and honest to the end. "I know you don't want to waste your time and then get disappointed," she said. "Thanks for a wonderful evening. Someday I'll tell my children I had supper with the great Johnny Fontane all alone in his apartment."

He smiled at her. "And that you didn't give in," he said. They both laughed. "They'll never believe that," she said. And then Johnny, being a little phony in his turn, said, "I'll give it to you in writing, want me to?" She shook her head. He continued on. "Anybody doubts you, give me a buzz on the phone, I'll straighten them right out. I'll tell them how I chased you all around the apartment but you kept your honor. OK?"

He had, finally, been a little too cruel and he felt stricken at the hurt on her young face. She understood that he was telling her that he hadn't tried too hard. He had taken the sweetness of her victory away from her. Now she would feel that it had been her lack of charm or attractiveness that had made her the victor this night. And being the girl she was, when she told the story of how she resisted the great Johnny Fontane, she would always have to add with a wry little smile, "Of course, he didn't try very hard." So now taking pity on her, he said, "If you ever feel real down, give me a ring. OK? I don't have to shack up every girl I know."

"I will," she said. She went out the door.

He was left with a long evening before him. He could have used what Jack Woltz called the "meat factory," the stable of willing starlets, but he wanted human companionship. He wanted to talk like a human being. He thought of his first wife, Virginia. Now that the work on the picture was finished he would have more time for the kids. He wanted to become part of their life again. And he worried about Virginia too. She wasn't equipped to handle the Hollywood sharpies who might come after her just so that they could brag about having screwed Johnny Fontane's first wife. As far as he knew, nobody could say that yet. Everybody could say it about his second wife though, he thought wryly. He picked up the phone.

He recognized her voice immediately and that was not surprising. He had heard it the first time when he was ten years old and they had been in 4B together. "Hi, Ginny," he said, "you busy tonight? Can I come over for a little while?"

"All right," she said. "The kids are sleeping though; I don't want to wake them up." "That's OK," he said. "I just wanted to talk to you."

Her voice hesitated slightly, then carefully controlled not to show any concern, she asked, "Is it anything serious, anything important?"

"No," Johnny said. "I finished the picture today and I thought maybe I could just see you and talk to you. Maybe I could take a look at the kids if you're sure they won't wake up."

"OK," she said. "I'm glad you got that part you wanted." "Thanks," he said. "I'll see you in about a half hour."

When he got to what had been his home in Beverly Hills, Johnny Fontane sat in the car for a moment staring at the house. He remembered what his Godfather had said, that he could make his own life what he wanted. Great chance if you knew what you wanted. But what did he want?

His first wife was waiting for him at the door. She was pretty, petite and brunette, a nice Italian girl, the girl next door who would never fool around with another man and that had been important to him. Did he still want her, he asked himself, and the answer was no. For

one thing, he could no longer make love to her, their affection had grown too old. And there were some things, nothing to do with sex, she could never forgive him. But they were no longer enemies.

She made him coffee and served him homemade cookies in the living room. "Stretch out on the sofa," she said, "you look tired." He took off his jacket and his shoes and loosened his tie while she sat in the chair opposite him with a grave little smile on her face. "It's funny," she said.

"What's funny?" he asked her, sipping coffee and spilling some of it on his shirt. "The great Johnny Fontane stuck without a date," she said.

"The great Johnny Fontane is lucky if he can even get it up anymore," he said.

It was unusual for him to be so direct. Ginny asked, "Is there something really the matter?" Johnny grinned at her. "I had a date with a girl in my apartment and she brushed me off.

And you know, I was relieved."

To his surprise he saw a look of anger pass over Ginny's face. "Don't worry about those little tramps," she said. "She must have thought that was the way to get you interested in her." And Johnny realized with amusement that Ginny was actually angry with the girl who had turned him down.

"Ah, what the hell," he said. "I'm tired of that stuff. I have to grow up sometime. And now that I can't sing anymore I guess I'll have a tough time with dames. I never got in on my looks, you know."

She said loyally, "You were always better looking than you photographed."

Johnny shook his head. "I'm getting fat and I'm getting bald. Hell, if this picture doesn't make me big again I better learn how to bake pizzas. Or maybe we'll put you in the movies, you look great."

She looked thirty-five. A good thirty-five, but thirty-five. And out here in Hollywood that might as well be a hundred. The young beautiful girls thronged through the city like lemmings, lasting one year, some two. Some of them so beautiful they could make a man's heart almost stop beating until they opened their mouths, until the greedy hopes for success clouded the loveliness of their eyes. Ordinary women could never hope to compete with them on a physical level. And you could talk all you wanted to about charm, about intelligence, about chic, about poise, the raw beauty of these girls overpowered everything else. Perhaps if there were not so many of them there might be a chance for an ordinary, nice-looking woman. And since Johnny Fontane could have all of them, or nearly all of them, Ginny knew that he was saying all this just to flatter her. He had always been nice that way. He had always been polite to women even at the height of his fame, paying them compliments, holding lights for their cigarettes, opening doors. And since an this was

usually done for *him*, it made it even more impressive to the girls he went out with. And he did it with all girls, even the one-night stands, I-don't-know-your-name girls.

She smiled at him, a friendly smile. "You already made me, Johnny, remember? For twelve years. You don't have to give me your line."

He sighed and stretched out on the sofa. "No kidding, Ginny, you look good. I wish I looked that good."

She didn't answer him. She could see he was depressed. "Do you think the picture is OK? Will it do you some good?" she asked.

Johnny nodded. "Yeah. It could bring me all the way back. If I get the Academy thing and play my cards right, I can make it big again even without the singing. Then maybe I can give you and the kids more dough."

"We have more than enough," Ginny said.

"I wants see more of the kids too," Johnny said. "I want to settle down a little bit. Why can't I come every Friday night for dinner here? I swear I'll never miss one Friday, I don't care how far away I am or how busy I am. And then whenever I can I'll spend weekends or maybe the kids can spend some part of their vacations with me."

Ginny put an ashtray on his chest. "It's OK with me," she said. "I never got married because I wanted you to keep being their father." She said this without any kind of emotion, but Johnny Fontane, staring up at the ceiling, knew she said it as an atonement for those other things, the cruel things she had once said to him when their marriage had broken up, when his career had started going down the drain.

"By the way, guess who called me," she said.

Johnny wouldn't play that game, he never did. "Who?" he asked.

Ginny said, "You could take at least one lousy guess." Johnny didn't answer. "Your Godfather," she said.

Johnny was really surprised. "He never talks to anybody on the phone. What did he say to you?"

"He told me to help you," Ginny said. "He said you could be as big as you ever were, that you were on your way back, but that you needed people to believe in you. I asked him why should I? And he said because you're the father of my children. He's such a sweet old guy and they tell such horrible stories about him."

Virginia hated phones and she had had all the extensions taken out except for the one in her bedroom and one in the kitchen. Now they could hear the kitchen phone ringing. She went to answer it. When she came back into the living room there was a look of surprise on her face.

"It's for you, Johnny," she said. "It's Tom Hagen. He says it's important." Johnny went into the kitchen and picked up the phone. "Yeah, Tom," he said.

Tom Hagen's voice was cool. "Johnny, the Godfather wants me to come out and see you and set some things up that can help you out now that the picture is finished. He wants me to catch the morning plane. Can you meet it in Los Angeles? I have to fly back to New York the same night so you won't have to worry about keeping your night free for me."

"Sure, Tom," Johnny said. "And don't worry about me losing a night. Stay over and relax a bit. I'll throw a party and you can meet some movie people." He always made that offer, he didn't want the folks from his old neighborhood to think he was ashamed of them.

"Thanks," Hagen said, "but I really have to catch the early morning plane back. OK, you'll meet the eleven-thirty A.M. out of New York?"

"Sure," Johnny said.

"Stay in your car," Hagen said. "Send one of your people to meet me when I get off the plane and bring me to you."

"Right," Johnny said.

He went back to the living room and Ginny looked at him inquiringly. "My Godfather has some plan for me, to help me out," Johnny said. "He got me the part in the movie, I don't know how. But I wish he'd stay out of the rest of it."

He went back onto the sofa. He felt very tired. Ginny said, "Why don't you sleep in the guest bedroom tonight instead of going home? You can have breakfast with the kids and you won't have to drive home so late. I hate to think of you all alone in that house of yours anyway. Don't you get lonely?"

"I don't stay home much," Johnny said.

She laughed and said, "Then you haven't changed much." She paused and then said, "Shall I fix up the other bedroom?"

Johnny said, "Why can't I sleep in your bedroom?"

She flushed. "No," she said. She smiled at him and he smiled back. They were still friends.

When Johnny woke up the next morning it was late, he could tell by the sun coming in through the drawn blinds. It never came in that way unless it was in the afternoon. He yelled, "Hey, Ginny, do I still rate breakfast?" And far away he heard her voice call, "Just a second."

And it was just a second. She must have had everything ready, hot in the oven, the tray waiting to be loaded, because as Johnny lit his fast cigarette of the day, the door of the

bedroom opened and his two small daughters came in wheeling the breakfast cart.

They were so beautiful it broke his heart. Their faces were shining and clear, their eyes alive with curiosity and the eager desire to run to him. They wore their hair braid old-fashioned in long pigtails and they wore old-fashioned frocks and white patent-leather shoes. They stood by the breakfast cart watching him as he stubbed out his cigarette and waited for him to call and hold his arms wide. Then they came running to him. He pressed his face between their two fresh fragrant cheeks and scraped them with his beard so that they shrieked. Ginny appeared in the bedroom door and wheeled the breakfast cart the rest of the way so that he could eat in bed. She sat beside him on the edge of the bed, pouring his coffee, buttering his toast. The two young daughters sat on the bedroom couch watching him. They were too old now for pillow fights or to be tossed around. They were already smoothing their mussed hair. Oh, Christ, he thought, pretty soon they'll be all grown up, Hollywood punks will be out after them.

He shared his toast and bacon with them as he ate, gave them sips of coffee. It was a habit left over from when he had been singing with the band and rarely ate with them so they liked to share his food when he had his odd-hour meals like afternoon breakfasts or morning suppers. The change-around in food delighted them--- to eat steak and french fries at seven in the morning, bacon and eggs in the afternoon.

Only Ginny and a few of his close friends knew how much he idolized his daughters. That had been the worst thing about the divorce and leaving home. The one thing he had fought about, and for, was his position as a father to them. In a very sly way he had made Ginny understand he would not be pleased by her remarrying, not because he was jealous of her, but because he was jealous of his position as a father. He had arranged the money to be paid to her so it would be enormously to her advantage financially not to remarry. It was understood that she could have lovers as long as they were not introduced into her home life. But on this score he had absolute faith in her. She had always been amazingly shy and old-fashioned in sex. The Hollywood gigolos had batted zero when they started swarming around her, sniffing for the financial settlement and the favors they could get from her famous husband.

He had no fear that she expected a reconciliation because he had wanted to sleep with her the night before. Neither one of them wanted to renew their old marriage. She understood his hunger for beauty, his irresistible impulse toward young women far more beautiful than she. It was known that he always slept with his movie co-stars at least once. His boyish charm was irresistible to them, as their beauty was to him.

"You'll have to start getting dressed pretty soon," Ginny said. "Tom's plane will be getting in." She shooed the daughters out of the room.

"Yeah," Johnny said. "By the way, Ginny, you know I'm getting divorced? I'm gonna be a free man again."

She watched him getting dressed. He always kept fresh clothes at her house ever since they had come to their new arrangement after the wedding of Don Corleone's daughter.

"Christmas is only two weeks away," she said. "Shall I plan on you being here?"

It was the first time he had even thought about the holidays. When his voice was in shape, holidays were lucrative singing dates but even then Christmas was sacred. If he missed this one, it would be the second one. Last year he had been courting his second wife in Spain, trying to get her to marry him.

"Yeah," he said. "Christmas Eve and Christmas." He didn't mention New Year's Eve. That would be one of the wild nights he needed every once in a while, to get drunk with his friends, and he didn't want a wife along then. He didn't feel guilty about it.

She helped him put on his jacket and brushed it off. He was always fastidiously neat. She could see him frowning because the shirt he had put on was not laundered to his taste, the cuff links, a pair he had not worn for some time, were a little too loud for the way he liked to dress now. She laughed softly and said, "Tom won't notice the difference."

The three women of the family walked him to the door and out on the driveway to his car. The two little girls held his hands, one on each side. His wife walked a little behind him. She was getting pleasure out of how happy he looked. When he reached his car he turned around and swung each girl in turn high up in the air and kissed her on the way down. Then he kissed his wife and got into the car. He never liked drawn-out good-byes.

**************

Arrangements had been made by his PR man and aide. At his house a chauffeured car was waiting, a rented car. In it were the PR man and another member of his entourage. Johnny parked his car and hopped in and they were on their way to the airport. He waited inside the car while the PR man went out to meet Tom Hagen's plane. When Tom got into the car they shook hands and drove back to his house.

Finally he and Tom were alone in the living room. There was a coolness between them. Johnny had never forgiven Hagen for acting as a barrier to his getting in touch with the Don when the Don was angry with him, in those bad days before Connie's wedding. Hagen never made excuses for his actions. He could not. It was part of his job to ad as a lightning rod for resentments which people were too awed to feel toward the Don himseif though he had earned them.

"Your Godfather sent me out here to give you a hand on some things," Hagen said. "I wanted to get it out of the way before Christmas."

Johnny Fontane shrugged. "The picture is finished. The director was a square guy and treated me right. My scenes are too important to be left on the cutting-room floor just for Woltz to pay me off. He can't ruin a ten-million-dollar picture. So now everything depends on how good people think I am in the movie."

Hagen said cautiously, "Is winning this Academy Award so terribly important to an actor's career, or is it just the usual publicity crap that really doesn't mean anything one way or the

other?" He paused and added hastily, "Except of course the glory, everybody likes glory."

Johnny Fontane grinned at him. "Except my Godfather. And you. No, Tom, it's not a lot of crap. An Academy Award can make an actor for ten years. He can get his pick of roles. The public goes to see him. It's not everything, but for an actor it's the most important thing in the business. I'm counting on winning it. Not because I'm such a great actor but because I'm known primarily as a singer and the part is foolproof. And I'm pretty good too, no kidding."

Tom Hagen shrugged and said, "Your Godfather tells me that the way things stand now, you don't have a chance of winning the award."

Johnny Fontane was angry. "What the hell are you talking about? The picture hasn't even been cut yet, much less shown. And the Don isn't even in the movie business. Why the hell did you fly the three thousand miles just to tell me that shit?" He was so shaken he was almost in tears.

Hagen said worriedly, "Johnny, I don't know a damn thing about all this movie stuff. Remember, I'm just a messenger boy for the Don. But we have discussed this whole business of yours many times. He worries about you, about your future. He feels you still need his help and he wants to settle your problem once and for all. That's why I'm here now, to get things rolling. But you have to start growing up, Johnny. You have to stop thinking about yourself as a singer or an actor. You've got to start thinking about yourself as a prime mover, as a guy with muscle."

Johnny Fontane laughed and filled his glass. "If I don't win that Oscar I'll have as much muscle as one of my daughters. My voice is gone; if I had that back I could make some moves. Oh, hell. How does my Godfather know I won't win it? OK, I believe he knows. He's never been wrong."

Hagen lit a thin cigar. "We got the word that Jack Woltz won't spend studio money to support your candidacy. In fact he's sent the word out to everybody who votes that he does not want you to win. But holding back the money for ads and all that may do it. He's also arranging to have one other guy get as much of the opposition votes as he can swing. He's using all sorts of bribes--- jobs, money, broads, everything. And he's trying to do it without hurting the picture or hurting it as little as possible."

Johnny Fontane shrugged. He filled his glass with whiskey and downed it. "Then I'm dead."

Hagen was watching him with his mouth curled up with distaste. "Drinking won't help your voice," he said.

"Fuck you," Johnny said.

Hagen's face suddenly became smoothly impassive. Then he said, "OK, I'll keep this purely business."

Johnny Fontane put his drink down and went over to stand in front of Hagen. "I'm sorry I said that, Tom," he said. "Christ, I'm sorry. I'm taking it out on you because I wanta kill that bastard Jack Woltz and I'm afraid to tell off my Godfather. So I get sore at you." There were tears in his eyes. He threw the empty whiskey glass against the wall but so weakly that the heavy shot glass did not even shatter and rolled along the floor back to him so that he looked down at it in baffled fury. Then he laughed. "Jesus Christ," he said.

He walked over to the other side of the room and sat opposite Hagen. "You know, I had everything my own way for a long time. Then I divorced Ginny and everything started going sour. I lost my voice. My records stopped selling. I didn't get any more movie work. And then my Godfather got sore at me and wouldn't talk to me on the phone or see me when I came into New York. You were always the guy barring the path and I blamed you, but I knew you wouldn't do it without orders from the Don. But you can't get sore at him. It's like getting sore at God. So I curse you. But you've been right all along the line. And to show you I mean my apology I'm taking your advice. No more booze until I get my voice back. OK?"

The apology was sincere. Hagen forgot his anger. There must be something to this thirty-five-year-old boy or the Don would not be so fond of him. He said, "Forget it, Johnny." He was embarrassed at the depth of Johnny's feeling and embarrassed by the suspicion that it might have been inspired by fear, fear that he might turn the Don against him. And of course the Don could never be turned by anyone for any reason. His affection was mutable only by himself.

"Things aren't so bad," he told Johnny. "The Don says he can cancel out everything Woltz does against you. That you will almost certainly win the Award. But he feels that won't solve your problem. He wants to know if you have the brains and balls to become a producer on your own, make your own movies from top to bottom."

"How the hell is he going to get me the Award?" Johnny asked incredulously.

Hagen said sharply, "How do you find it so easy to believe that Woltz can finagle it and your Godfather can't? Now since it's necessary to get your faith for the other part of our deal I must tell you this. Just keep it to yourself. Your Godfather is a much more powerful man than Jack Woltz. And he is much more powerful in areas far more critical. How can he swing the Award? He controls, or controls the people who control, all the labor unions in the industry, all the people or nearly all the people who vote. Of course you have to be good, you have to be in contention on your own merits. And your Godfather has more brains than Jack Woltz. He doesn't go up to these people and put a gun to their heads and say, 'Vote for Johnny Fontane or you are out of a job.' He doesn't strong-arm where strong-arm doesn't work or leaves too many hard feelings. He'll make those people vote for you because they want to. But they won't want to unless he takes an interest. Now just take my word for it that he can get you the Award. And that if he doesn't do it, you won't get it."

"OK," Johnny said. "I believe you. And I have the balls and brains to be a producer but I don't have the money. No bank would finance me. It takes millions to support a movie."

Hagen said dryly, "When you get the Award, start making plans to produce three of your own movies. Hire the best people in the business, the best technicians, the best stars, whoever you need. Plan on three to five movies."

"You're crazy," Johnny said. "That many movies could mean twenty million bucks." "When you need the money," Hagen said, "get in touch with me. I'll give you the name of

the bank out here in California to ask for financing. Don't worry, they finance movies all the time. Just ask them for the money in the ordinary way, with the proper justifications, like a regular business deal. They will approve. But first you have to see me and tell me the figures and the plans. OK?"

Johnny was silent for a long time. Then he said quietly, "Is there anything else?"

Hagen smiled. "You mean, do you have to do any favors in return for a loan of twenty million dollars? Sure you will." He waited for Johnny to say something. "Nothing you wouldn't do anyway if the Don asked you to do it for him."

Johnny said, "The Don has to ask me himself if it's something serious, you know what I mean? I won't take your word or Sonny's for it."

Hagen was surprised by this good sense. Fontane had some brains after all. He had sense to know that the Don was too fond of him, and too smart, to ask him to do something foolishly dangerous, whereas Sonny might. He said to Johnny, "Let me reassure you on one thing. Your Godfather has given me and Sonny strict instructions not to involve you in any way in anything that might get you bad publicity, through our fault. And he will never do that himself. I guarantee you that any favor he asks of you, you will offer to do before he requests it. OK?"

Johnny smiled."OK," he said.

Hagen said, "Also he has faith in you. He thinks you have brains and so he figures the bank will make money on the investment; which means he will make money on it. So it's really a business deal, never forget that. Don't go screwing around with the money. You may be his favorite godson but twenty million bucks is a lot of dough. He has to stick his neck out to make sure you get it."

"Tell him not to worry," Johnny said. "If a guy like Jack Woltz can be a big movie genius, anybody can."

"That's what your Godfather figures," Hagen said. "Can you have me driven back to the airport? I've said all I have to say. When you do start signing contracts for everything, hire your own lawyers, I won't be in on it. But I'd like to see everything before you sign, if that's OK with you. Also, you'll never have any labor troubles. That will cut costs on your pictures to some extent, so when the accountants lump some of that in, disregard those figures."

Johnny said cautiously, "Do I have to get your OK on anything else, scripts, slats, any of

that?"

Hagen shook his head. "No," he aid. "It may happen that the Don would object to something but he'll object to you direct if he does. But I can't imagine what that would be. Movies don't affect him at all, in any way, so he has no interest. And he doesn't believe in meddling, that I can tell you from experience."

"Good," Johnny said. "I'll drive you to the airport myself. And thank the Godfather for me. I'd call him up and thank him but he never comes to the phone. Why is that, by the way?"

Hagen shrugged. "He hardly ever talks on the phone. He doesn't want his voice recorded, even saying something perfectly innocent. He's afraid that they can splice the words together so that it sounds as if he says something else. I think that's what it is. Anyway his only worry is that someday he'll be framed by the authorities. So he doesn't want to give them an edge."

They got into Johnny's car and drove to the airport. Hagen was thinking that Johnny was a better guy than he figured. He'd already learned something, just his driving him personally to the airport proved that. The personal courtesy, something the Don himself always believed in. And the apology. That had been sincere. He had known Johnny a long time and he knew the apology would never be made out of fear. Johnny had always had guts. That's why he had always been in trouble, with his movie bosses and with his women. He was also one of the few people who was not afraid of the Don. Fontane and Michael were maybe the only two men Hagen knew of whom this could be said. So the apology was sincere, he would accept it as such. He and Johnny would have to see a lot of each other in the next few years. And Johnny would have to pass the next test, which would prove how smart he was. He would have to do something for the Don that the Don would never ask him to do or insist that he do as part of the agreement. Hagen wondered if Johnny Fontane was smart enough to figure out that part of the bargain.

**************

After Johnny dropped Hagen off at the airport (Hagen insisted that Johnny not hang around for his plane with him) he drove back to Ginny's house. She was surprised to see him. But he wanted to stay at her place so that he would have time to think things out, to make his plans. He knew that what Hagen had told him was extremely important, that his whole life was being changed. He had once been a big star but now at the young age of thirty-five he was washed up. He didn't kid himself about that. Even if he won the Award as best actor, what the hell could it mean at the most? Nothing, if his voice didn't come back. He'd be just second-rate, with no real power, no real juice. Even that girl turning him down, she had been nice and smart and acting sort of hip, but would she have been so cool if he had really been at the top? Now with the Don backing him with dough he could be as big as anybody in Hollywood. He could be a king. Johnny smiled. Hell. He could even be a Don.

It would be nice living with Ginny again for a few weeks, maybe longer. He'd take the kids out every day, maybe have a few friends over. He'd stop drinking and smoking, really take care of himself. Maybe his voice would get strong again. If that happened and with the Don's

money, he'd be unbeatable. He'd really be as close to an oldtime king or emperor as it was possible to be in America. And it wouldn't depend on his voice holding up or how long the public cared about him as an actor. It would be an empire rooted in money and the most special, the most coveted kind of power.

Ginny had the guest bedroom made up for him. It was understood that he would not share her room, that they would not live as man and wife. They could never have that relationship again. And though the outside world of gossip columnists and movie fans gave the blame for the failure of their marriage solely to him, yet in a curious way, between the two of them, they both knew that she was even more to blame for their divorce.

When Johnny Fontane because the most popular singer and movie musical comedy star in motion pictures, it had never occurred to him to desert his wife and children. He was too Italian, still too old-style. Naturally he had been unfaithful. That had been impossible to avoid in his business and the temptations to which he was continually exposed. And despite being a skinny, delicate-looking guy, he had the wiry horniness of many small-boned Latin types. And women delighted him in their surprises. He loved going out with a demure sweet-faced virginal-looking girl and then uncapping her breasts to find them so unexpectedly slopingly full and rich, lewdly heavy in contrast to the cameo face. He loved to find sexual shyness and timidity in the sexy-looking girls who were all fake motion like a shifty basketball player, vamping as if they had slept with a hundred guys, and then when he got them alone having to battle for hours to get in and do the job and finding out they were virgins.

And all these Hollywood guys laughed at his fondness for virgins. They called it an old guinea taste, square, and look how long it took to make a virgin give you a blow job with all the aggravation and then they usually turned out to be a lousy piece of ass. But Johnny knew that it was how you handled a young girl. You had to come on to her the right way and then what could be greater than a girl who was tasting her first dick and loving it? Ah, it was so great breaking them in. It was so great having them wrap their legs around you. Their thighs were all different shapes, their asses were different, their skins were all different colors and shades of white and brown and tan and when he had slept with that young colored girl in Detroit, a good girl, not a hustler, the young daughter of a jazz singer on the same nightclub bill with him, she had been one of the sweetest things he had ever had. Her lips had really tasted like warm honey with pepper mixed in it, her dark brown skin was rich, creamy, and she had been as sweet as God had ever made any woman and she had been a virgin.

And the other guys were always talking about blow jobs, this and other variations, and he really didn't enjoy that stuff so much. He never liked a girl that much after they tried it that way, it just didn't satisfy him right. He and his second wife had finally not got along, because she preferred the old sixty-nine too much to a point where she didn't want anything else and he had to fight to stick it in. She began making fun of him and calling him a square and the word got around that he made love like a kid. Maybe that was why that girl last night had turned him down. Well, the hell with it, she wouldn't be too great in the sack anyway. You could tell a girl who really liked to fuck and they were always the best. Especially the ones who hadn't been at it too long. What he really hated were the ones who had started screwing at twelve and were all fucked out by the time they were twenty and just going through the

motions and some of them were the prettiest of all and could fake you out.

Ginny brought coffee and cake into his bedroom and put it on the long table in the sitting room part. He told her simply that Hagen was helping him put together the money credit for a producing package and she was excited about that. He would be important again. But she had no idea of how powerful Don Corleone really was so she didn't understand the significance of Hagen coming from New York. He told her Hagen was also helping with legal details.

When they had finished the coffee be told her he was going to work that night, and make phone calls and plans for the future. "Half of all this will be in the kids' names," he told her. She gave him a grateful smile and kissed him good night before she left his room.

There was a glass dish full of his favorite monogrammed cigarettes, a humidor with pencil-thin black Cuban cigars on his writing desk. Johnny tilted back and started making calls. His brain was really whirring along. He called the author of the book, the best-selling novel, on which his new film was based. The author was a guy his own age who had come up the hard way and was now a celebrity in the literary world. He had come out to Hollywood expecting to be treated like a wheel and, like most authors, had been treated like shit. Johnny had seen the humiliation of the author one night at the Brown Derby. The writer had been fixed up with a well-known bosomy starlet for a date on the town and a sure shack-up later. But while they were at dinner the starlet had deserted the famous author because a ratty-looking movie comic had waggled his finger at her. That had given the writer the right slant on just who was who in the Hollywood pecking order. It didn't matter that his book had made him world famous. A starlet would prefer the crummiest, the rattiest, the phoniest movie wheel.

Now Johnny called the author at his New York home to thank him for the great part he had written in his book for him. He flattered the shit out of the guy. Then casually he asked him how he was doing on his next novel and what it was all about. He lit a cigar while the author told him about a specially interesting chapter and then finally said, "Gee, I'd like to read it when you're finished. How about sending me a copy? Maybe I can get you a good deal for it, better than you got with Woltz."

The eagerness in the author's voice told him that he had guessed right. Woltz had chiseled the guy, given him peanuts for the book. Johnny mentioned that he might be in New York right after the holidays and would the author want to come and have dinner with some of his friends. "I know a few good-looking broads," Johnny said jokingly. The author laughed and said OK.

Next Johnny called up the director and cameraman on the film he had just finished to thank them for having helped him in the film. He told them confidentially that he knew Woltz had been against him and he doubly appreciated their help and that if there was ever anything he could do for them they should just call.

Then he made the hardest call of all, the one to Jack Woltz. He thanked him for the part in the picture and told him how happy he would be to work for him anytime. He did this merely

to throw Woltz off the track. He had always been very square, very straight. In a few days Woltz would find out about his maneuvering and be astounded by the treachery of this call, which was exactly what Johnny Fontane wanted him to feel.

After that he sat at the desk and puffed at his cigar. There was whiskey on a side table but he had made some sort of promise to himself and Hagen that he wouldn't drink. He shouldn't even be smoking. It was foolish; whatever was wrong with his voice probably wouldn't be helped by knocking off drinking and smoking. Not too much, but what the hell, it might help and he wanted all the percentages with him, now that he had a fighting chance.

Now with the house quiet, his divorced wife sleeping, his beloved daughters sleeping, he could think back to that terrible time in his life when he had deserted them. Deserted them for a whore tramp of a bitch who was his second wife. But even now he smiled at the thought of her, she was such a lovely broad in so many ways and, besides, the only thing that saved his life was the day that he had made up his mind never to hate a woman or, more specifically, the day he had decided he could not afford to hate his first wife and his daughters, his girl friends, his second wife, and the girl friends after that, right up to Sharon Moore brushing him off so that she could brag about refusing to screw for the great Johnny Fontane.

**************

He had traveled with the band singing and then he had become a radio star and a star of the movie stage shows and then he had finally made it in the movies. And in all that time he had lived the way he wanted to, screwed the women he wanted to, but he had never let it affect his personal life. Then he had fallen for his soon to be second wife, Margot Ashton; he had gone absolutely crazy for her. His career had gone to hell, his voice had gone to hell, his family life had gone to hell. And there had come the day when he was left without anything.

The thing was, he had always been generous and fair. He had given his first wife everything he owned when he divorced her. He had made sure his two daughters would get a piece of everything he made, every record, every movie, every club date. And when he had been rich and famous he had refused his first wife nothing. He had helped out all her brothers and sisters, her father and mother, the girl friends she had gone to school with and their families. He had never been a stuck-up celebrity. He had sung at the weddings of his wife's two younger sisters, something he hated to do. He had never refused her anything except the complete surrender of his own personality.

And then when he had touched bottom, when he could no longer get movie work, when he could no longer sing, when his second wife had betrayed him, he had gone to spend a few days with Ginny and his daughters. He had more or less flung himself on her mercy one night because he felt so lousy. That day he had heard one of his recordings and he had sounded so terrible that he accused the song technicians of sabotaging the record. Until finally he had become convinced that that was what his voice really sounded like. He had smashed the master record and refused to sing anymore. He was so ashamed that he had not sung a note except with Nino at Connie Corleone's wedding.

He had never forgotten the look on Ginny's face when she found out about all his misfortunes. It had passed over her face only for a second but that was enough for him never to forget it. It was a look of savage and joyful satisfaction. It was a look that could only make him believe that she had contemptuously hated him all these years. She quickly recovered and offered him cool but polite sympathy. He had pretended to accept it. During the next few days he had gone to see three of the girls he had liked the most over the years, girls he had remained friends with and sometimes still slept with in a comradely way, girls that he had done everything in his power to help, girls to whom he had given the equivalent of hundreds of thousands of dollars in gifts or job opportunities. On their faces he had caught that same fleeting look of savage satisfaction.

It was during that time that he knew he had to make a decision. He could become like a great many other men in Hollywood, successful producers, writers, directors, actors, who preyed on beautiful women with lustful hatred. He could use power and monetary favors grudgingly, always alert for treason, always believing that women would betray and desert him, adversaries to be bested. Or he could refuse to hate women and continue to believe in them.

He knew he could not afford *not* to love them, that something of his spirit would die if he did not continue to love women no matter how treacherous and unfaithful they were. It didn't matter that the women he loved most in the world were secretly glad to see him crushed, humiliated, by a wayward fortune; it did not matter that in the most awful way, not sexually, they had been unfaithful to him. He had no choice. He had to accept them. And so he made love to all of them, gave them presents, hid the hurt their enjoyment of his misfortunes gave him. He forgave them knowing he was being paid back for having lived in the utmost freedom from women and in the fullest flush of their favor. But now he never felt guilty about being untrue to them. He never felt guilty about how he treated Ginny, insisting on remaining the sole father of his children, yet never even considering remarrying her, and letting her know that too. That was one thing he had salvaged out of his fall from the top. He had grown a thick skin about the hurts he gave women.

He was tired and ready for bed but one note of memory stuck with him: singing with Nino Valenti. And suddenly he knew what would please Don Corleone more than anything else. He picked up the phone and told the operator to get him New York. He called Sonny Corleone and asked him for Nino Valenti's number. Then he called Nino. Nino sounded a little drunk as usual.

"Hey, Nino, how'd you like to come out here and work for me," Johnny said. "I need a guy I can trust."

Nino, kidding around, said, "Gee, I don't know, Johnny, I got a good job on the truck, boffing housewives along my route, picking up a clear hundred-fifty every week. What you got to offer?"

"I can start you at five hundred and get you blind dates with movie stars, how's that?" Johnny said. "And maybe I'll let you sing at my parties."

"Yeah, OK, let me think about it." Nino said. "Let me talk it over with my lawyer and my accountant and my helper on the truck."

"Hey, no kidding around, Nino," Johnny said. "I need you out here. I want you to fly out tomorrow morning and sign a personal contract for five hundred a week for a year. Then if you steal one of my broads and I fire you, you pick up at least a year's salary. OK?"

There was a long pause. Nino's voice was sober. "Hey, Johnny, you kidding?"

Johnny said, "I'm serious, kid. Go to my agent's office in New York. They'll have your plane ticket and some cash. I'm gonna call them first thing in the morning. So you go up there in the afternoon. OK? Then I'll have somebody meet you at the plane and bring you out to the house."

Again there was a long pause and then Nino's voice, very subdued, uncertain, said, "OK, Johnny." He didn't sound drunk anymore.

Johnny hung up the phone and got ready for bed. He felt better than any time since he had smashed that master record.

# Chapter 13

Johnny Fontane sat in the huge recording studio and figured costs on a yellow pad. Musicians were filing in, all of them friends he had known since he was a kid singer with the bands. The conductor, top man in the business of pop accompaniment and a man who had been kind to him when things went sour, was giving each musician bundles of music and verbal instructions. His name was Eddie Neils. He had taken on this recording as a favor to Johnny, though his schedule was crowded.

Nino Valenti was sitting at a piano fooling around nervously with the keys. He was also sipping from a huge glass of rye. Johnny didn't mind that. He knew Nino sang just as well drunk as sober and what they were doing today wouldn't require any real musicianship on Nino's part.

Eddie Neils had made special arrangements of some old Italian and Sicilian songs; and a special job on the duel-duet song that Nino and Johnny had sung at Connie Corleone's wedding. Johnny was making the record primarily because he knew that the Don loved such songs and it would be a perfect Christmas gift for him. He also had a hunch that the record would sell in the high numbers, not a million, of course. And he had figured out that helping Nino was how the Don wanted his payoff. Nino was, after all, another one of the Don's godchildren.

Johnny put his clipboard and yellow pad on the folding chair beside him and got up to stand beside the piano. He said, "Hey, *paisan*," and Nino glanced up and tried to smile. He looked a little sick. Johnny leaned over and rubbed his shoulder blades. "Relax, kid," he said. "Do a good job today and I'll fix you up with the best and most famous piece of ass in Hollywood."

Nino took a gulp of whiskey."Who's that, Lassie?"

Johnny laughed. "No, Deanna Dunn. I guarantee the goods."

Nino was impressed but couldn't help saying with pseudo-hopefulness, "You can't get me Lassie?"

The orchestra swung into the opening song of the medley. Johnny Fontane listened intently. Eddie Neils would play all the songs through in their special arrangements. Then would come the first take for the record. As Johnny listened he made mental notes on exactly how he would handle each phrase, how he would come into each song. He knew his voice wouldn't last long, but Nino would be doing most of the singing, Johnny would be singing under him. Except of course in the duet-duel song. He would have to save himself for that.

He pulled Nino to his feet and they both stood by their microphones. Nino flubbed the opening, flubbed it again. His face was beginning to get red with embarrassment. Johnny kidded him, "Hey, you stalling for overtime?"

"I don't feel natural without my mandolin," Nino said.

Johnny thought that over for a moment. "Hold that glass of booze in your hand," he said.

It seemed to do the trick. Nino kept drinking from the glass as he sang but he was doing fine. Johnny sang easily, not straining, his voice merely dancing around Nino's main melody. There was no emotional satisfaction in this kind of singing but he was amazed at his own technical skill. Ten years of vocalizing had taught him something.

When they came to the duet-duel song that ended the record, Johnny let his voice go and when they finished his vocal cords ached. The musicians had been carried away by the last song, a rare thing for these calloused veterans. They hammered down their instruments and stamped their feet in approval as applause. The drummer gave them a ruffle of drums.

With stops and conferences they worked nearly four hours before they quit. Eddie Neils came over to Johnny and said quietly, "You sounded pretty good, kid. Maybe you're ready to do a record. I have a new song that's perfect for you."

Johnny shook his head. "Come on, Eddie, don't kid me. Besides, in a couple of hours I'll be too hoarse to even talk. Do you think we'll have to fix up much of the stuff we did today?"

Eddie said thoughtfully, "Nino will have to come into the studio tomorrow. He made some mistakes. But he's much better than I thought he would be. As for your stuff, I'll have the sound engineers fix anything I don't like. OK?"

"OK," Johnny said. "When can I hear the pressing?"

"Tomorrow night," Eddie Neils said. "Your place?"

"Yeah," Johnny said. "Thanks, Eddie. See you tomorrow." He took Nino by the arm and walked out of the studio. They went to his house instead of Ginny's.

By this time it was late afternoon. Nino was still more than half-drunk. Johnny told him to get under the shower and then take a snooze. They had to be at a big party at eleven that night.

When Nino woke up, Johnny briefed him. "This party is a movie star Lonely Hearts Club," he said. "These broads tonight are dames you've seen in the movies as glamour queens millions of guys would give their right arms to screw. And the only reason they'll be at the party tonight is to find somebody to shack them up. Do yov know why? Because they are hungry for it, they are just a little old. And just like every dame, they want it with a little bit of class."

"What's the matter with your voice?" Nino asked.

Johnny had been speaking almost in a whisper. "Every time after I sing a little bit that happens. I won't be able to sing for a month now. But I'll get over the hoarseness in a couple of days."

Nino said thoughtfully, "Tough, huh?"

Johnny shrugged. "Listen, Nino, don't get too drunk tonight. You have to show these Hollywood broads that my *paisan* buddy ain't weak in the poop. You gotta come across. Remember, some of these dames are very powerful in movies, they can get you work. It doesn't hurt to be charming after you knock off a piece."

Nino was already pouring himself a drink. "I'm always charming," he said. He drained the glass. Grinning, he asked, "No kidding, can you really get me close to Deanna Dunn?"

"Don't be so anxious," Johnny said. "It's not going to be like you think."

**************

The Hollywood Movie Star Lonely Hearts Club (so called by the young juvenile leads whose attendance was mandatory) met every Friday night at the palatial, studio-owned home of Roy McElroy, press agent or rather public relations counsel for the Woltz International Film Corporation. Actually, though it was McElroy's open house party, the idea had come from the practical brain of Jack Woltz himself. Some of his money-making movie stars were getting older now. Without the help of special lights and genius makeup men they looked their age. They were having problems. They had also become, to some extent, desensitized physically and mentally. They could no longer "fall in love." They could no longer assume the role of hunted women. They had been made too imperious; by money, by fame, by their former beauty. Woltz gave his parties so that it would be easier for them to pick up lovers, one-night stands, who, if they had the stuff, could graduate into

full-time bed partners and so work their way upward. Since the action sometimes degenerated into brawls or sexual excess that led to trouble with the police, Woltz decided to hold the parties in the house of the public relation counselor, who would be right there to fix things up, pay off newsmen and police officers and keep everything quiet.

For certain virile young male actors on the studio payroll who had not yet achieved stardom or featured roles, attendance at the Friday night parties was not always pleasant duty. This was explained by the fact that a new film yet to be released by the studio would be shown at the party. In fact that was the excuse for the party itself. People would say, "Let's go over to see what the new picture so and so made is like." And so it was put in a professional context.

Young female starlets were forbidden to attend the Friday night parties. Or rather discouraged. Most of them took the hint.

Screenings of the new movies took place at midnight and Johnny and Nino arrived at eleven. Roy McElroy proved to be, at first sight, an enormously likable man, well-groomed, beautifully dressed. He greeted Johnny Fontane with a surprised cry of delight. "What the hell are you doing here?" he said with genuine astonishment.

Johnny shook his hand. "I'm showing my country cousin the sights. Meet Nino." McElroy shook hands with Nino and gazed at him appraisingly. "They'll eat him up alive,"

he said to Johnny. He led them to the rear patio.

The rear patio was really a series of huge rooms whose glass doors had been opened to a garden and pool. There were almost a hundred people milling around, all with drinks in their hands. The patio lighting was artfully arranged to flatter feminine faces and skin. These were women Nino had seen on the darkened movie screens when he had been a teenager. They had played their part in his erotic dreams of adolescence. But seeing them now in the flesh was like seeing them in some horrible makeup. Nothing could hide the tiredness of their spirit and their flesh; time had eroded their godhead. They posed and moved as charmingly as he remembered but they were like wax fruit, they could not lubricate his glands. Nino took two drinks, wandered to a table where he could stand next to a nest of bottles. Johnny moved with him. They drank together until behind them came the magic voice of Deanna Dunn.

Nino, like millions of other men, had that voice imprinted on his brain forever. Deanna Dunn had won two Academy Awards, had been in the biggest movie grosser made in Hollywood. On the screen she had a feline feminine charm that made her irresistible to all men. But the words she was saying had never been heard on the silver screen. "Johnny, you bastard, I had to go to my psychiatrist again because you gave me a one-night stand. How come you never came back for seconds?"

Johnny kissed her on her proffered cheek. "You wore me out for a month," he said. "I want you to meet my cousin Nino. A nice strong Italian boy. Maybe he can keep up with you."

Deanna Dunn turned to give Nino a cool look. "Does he like to watch previews?" Johnny laughed. "I don't think he's ever had the chance. Why don't you break him in?"

Nino had to take a big drink when he was alone with Deanna Dunn. He was trying to be nonchalant but it was hard. Deanna Dunn had the upturned nose, the clean-cut classical features of the Anglo-Saxon beauty. And he knew her so well. He had seen her alone in a bedroom, heartbroken, weeping over her dead flier husband who had left her with fatherless children. He had seen her angry, hurt, humiliated, yet with a shining dignity when a caddish Clark Gable had taken advantage of her, then left her for a sexpot. (Deanna Dunn never played sexpots in the movies.) He had seen her flushed with requited love, writhing in the embrace of the man she adored and he had seen her die beautifully at least a half dozen times. He had seen her and heard her and dreamed about her and yet he was not prepared for the first thing she said to him alone.

"Johnny is one of the few men with balls in this town," she said. "The rest are all fags and sick morons who couldn't get it up with a broad if you pumped a truckload of Spanish fly into their scrotums." She took Nino by the hand and led him into a corner of the room, out of traffic and out of competition.

Then still coolly charming, she asked him about himself. He saw through her. He saw that she was playing the role of the rich society girl who is being kind to the stableboy or the chauffeur, but who in the movie would either discourage his amatory interest (if the part were played by Spencer Tracy), or throw up everything in her mad desire for him (if the part were played by Clark Gable). But it didn't matter. He found himself telling her about how he and Johnny had grown up together in New York, about how he and Johnny had sung together on little club dates. He found her marvelously sympathetic and interested. Once she asked casually, "Do you know how Johnny made that bastard Jack Woltz give him the part?" Nino froze and shook his head. She didn't pursue it.

The time had come to see the preview of a new Woltz movie. Deanna Dunn led Nino, her warm hand imprisoning his, to an interior room of the mansion that had no windows but was furnished with about fifty small two-person couches scattered around in such a way as to give each one a little island of semiprivacy.

Nino saw there was a small table beside the couch and on the table were an ice bowl, glasses and bottles of liquor plus a tray of cigarettes. He gave Deanna Dunn a cigarette, lit it and then mixed them both drinks. They didn't speak to each other. After a few minutes the lights went out.

He had been expecting something outrageous. After all, he had heard the legends of Hollywood depravity. But he was not quite prepared for Deanna Dunn's voracious plummet on his sexual organ without even a courteous and friendly word of preparation. He kept sipping his drink and watching the movie, but not tasting, not seeing. He was excited in a way he had never been before but part of it was because this woman servicing him in the dark had been the object of his adolescent dreams.

Yet in a way his masculinity was insulted. So when the world-famous Deanna Dunn was sated and had tidied him up, he very coolly fixed her a fresh drink in the darkness and lit her a fresh cigarette and said in the most relaxed voice imaginable, "This looks like a pretty good movie."

He felt her stiffen beside him on the couch. Could it be she was waiting for some sort of compliment? Nino poured his glass full from the nearest bottle his hand touched in the darkness. The hell with that. She'd treated him like a goddamn male whore. For some reason now he felt a cold anger at all these women. They watched the picture for another fifteen minutes. He leaned away from her so their bodies did not touch.

Finally she said in a low harsh whisper, "Don't be such a snotty punk, you liked it. You were as big as a house."

Nino sipped his drink and said in his natural off-hand manner, "That's the way it *always* is. You should see it when I get excited."

She laughed a little and kept quiet for the rest of the picture. Finally it was over and the lights went on. Nino took a look around. He could see there had been a ball here in the darkness though oddly enough he hadn't heard a thing. But some of the dames had that hard, shiny, brighteyed look of women who had just been worked over real good. They sauntered out of the projection room. Deanna Dunn left him immediately to go over and talk to an older man Nino recognized as a famous featured player, only now, seeing the guy in person, he realized that he was a fag. He sipped his drink thoughtfully.

Johnny Fontane came up beside him and said, "Hi, old buddy, having a good time?"

Nino grinned. "I don't know. It's different. Now when I go back to the old neighborhood I can say Deanna Dunn had me."

Johnny laughed. "She can be better than that if she-invites you home with her. Did she?"

Nino shook his head. "I got too interested in the movie," he said. But this time Johnny didn't laugh.

"Get serious, kid," he said. "A dame like that cn do you a lot of good. And you used to boff anything. Man, sometimes I still get nightmares when I remember those ugly broads you used to bang."

Nino waved his glass drunkenly and said very loud, "Yeah, they were ugly but they were *women*." Deanna Dunn, in the corner, turned her head to look at them. Nino waved his glass at her in greeting.

Johnny Fontane sighed. "OK, you're just a guinea peasant."

"And I ain't gonna change," Nino said with his charmingly drunken smile.

Johnny understood him perfectly. He knew Nino was not as drunk as he pretended. He knew that Nino was only pretending so that he could say things which he felt were too rude to say to his new Hollywood *padrone* when sober. He put his arm around Nino's neck and said affectionately, "You wise guy bum, you know you got an ironclad contract for a year and you can say and do anything you want and I can't fire you."

"You can't fire me?" Nino said with drunken cunning. "No," Johnny said.

"Then fuck you," Nino said.

For a moment Johnny was surprised into anger. He saw the careless grin on Nino's face. But in the past few years he must have gotten smarter, or his own descent from stardom had made him more sensitive. In that moment he understood Nino, why his boyhood singing partner had never become successful, why he was trying to destroy any chance of success now. That Nino was reacting away from all the prices of success, that in some way he felt insulted by everything that was being done for him.

Johnny took Nino by the arm and led him out of the house. Nino could barely walk now. Johnny was talking to him soothingly. "OK, kid, you just sing for me, I wants make dough on you. I won't try to run your life. You do whatever you wants do. OK, *paisan*? All you gotta do is sing for me and earn me money now that I can't sing anymore. You got that, old buddy?"

Nino straightened up. "I'll sing for you, Johnny," he said, his voice slurring so that he could barely be understood. "I'm a better singer than you now. I was always a better singer than you, you know that?"

Johnny stood there thinking; so that was it. He knew that when his voice was healthy Nino simply wasn't in the same league with him, never had been in those years they had sung together as kids. He saw Nino was waiting for an answer, weaving drunkenly in the California moonlight. "Fuck you," he said gently, and they both laughed together like the old days when they had both been equally young.

**************

When Johnny Fontane got word about the shooting of Don Corleone he not only worried about his Godfather, but also wondered whether the financing for his movie was still alive. He had wanted to go to New York to pay his respects to his Godfather in the hospital but he had been told not to get any bad publicity, that was the last thing Don Corleone would want. So he waited. A week later a messenger came from Tom Hagen. The financing was still on but for only one picture at a time.

Meanwhile Johnny let Nino go his own way in Hollywood and California, and Nino was doing all right with the young starlets. Sometimes Johnny called him up for a night out together but never leaned on him. When they talked about the Don getting shot, Nino said to

Johnny, "You know, once I asked the Don for a job in his organization and he wouldn't give it to me. I was tired of driving a truck and I wanted to make a lot of dough. You know what he told me? He says every man has only one destiny and that my destiny was to be an artist. Meaning that I couldn't be a racket guy."

Johnny thought that one over. The Godfather must be just about the smartest guy in the world. He'd known immediately that Nino could never make a racket guy, would only get himself in trouble or get killed. Get killed with just one of his wisecracks. But how did the Don know that he would be an artist? Because, goddamn it, he figured that someday I'd help Nino. And how did he figure that? Because he would drop the word to me and I would try to show my gratitude. Of course he never asked me to do it. He just let me know it would make him happy if I did it. Johnny Fontane sighed. Now the Godfather was hurt, in trouble, and he could kiss the Academy Award good-bye with Woltz working against him and no help on his side. Only the Don had the personal contacts that could apply pressure and the Corleone Family had other things to think about. Johnny had offered to help, Hagen had given him a curt no.

Johnny was busy getting his own picture going. The author of the book he had starred in had finished his new novel and came west on Johnny's invitation, to talk it over without agents or studios getting into the act. The second book was perfect for what Johnny wanted. He wouldn't have to sing, it had a good gutsy story with plenty of dames and sex and it had a part that Johnny instantly recognized as tailor-made for Nino. The character talked like Nino, acted like him, even looked like him. It was uncanny. All Nino would have to do would be to get up on the screen and be himself.

Johnny worked fast. He found that he knew a lot more about production than he thought he did, but he hired an executive producer, a man who knew his stuff but had trouble finding work because of the blacklist. Johnny didn't take advantage but gave the man a fair contract. "I expect you to save me more dough this way," he told the man frankly.

So he was surprised when the executive producer came to him and told him the union rep had to be taken care of to the tune of fifty thousand dollars. There were a lot of problems dealing with overtime and hiring and the fifty thousand dollars would be well spent. Johnny debated whether the executive producer was hustling him and then said, "Send the union guy to me."

The union guy was Billy Goff. Johnny said to him, "I thought the union stuff was fixed by my friends. I was told not to worry about it. At all."

Goff said, "Who told you that?"

Johnny said, "You know goddamn well who told me. I won't say his name but if he tells me something that's it."

Goff said, "Things have changed. Your friend is in trouble and his word don't go this far west anymore."

Johnny shrugged. "See me in a couple of days. OK?"

Goff smiled. "Sure, Johnny," he said. "But calling in New York ain't going to help you."

But calling New York did help. Johnny spoke to Hagen at his office. Hagen told him bluntly not to pay. "Your Godfather will be sore as hell if you pay that bastard a dime," he told Johnny. "It will make the Don lose respect and right now he can't afford that."

"Can I talk to the Don?" Johnny asked. "Will you talk to him? I gotta get the picture rolling."

"Nobody can talk to the Don right now," Hagen said. "He's too sick. I'll talk to Sonny about fixing things up. But I'll make the decision on this. Don't pay that smart bastard a dime. If anything changes, I'll let you know."

Annoyed, Johnny hung up. Union trouble could add a fortune to making the film and screw up the works generally. For a moment he debated slipping Goff the fifty grand on the quiet. After all, the Don telling him something and Hagen telling him something and giving him orders were two different things. But he decided to wait for a few days.

By waiting he saved fifty thousand dollars. Two nights later, Goff was found shot to death in his home in Glendale. There was no more talk of union trouble. Johnny was a little shaken by the killing. It was the first time the long arm of the Don had struck such a lethal blow so close to him.

As the weeks went by and he became busier and busier with getting the script ready, casting the movie and working out production details, Johnny Fontane forgot about his voice, his not being able to sing. Yet when the Academy Award nominations came out and he found himself one of the candidates, he was depressed because he was not asked to sing one of the songs nominated for the Oscar at the ceremony that would be televised nationally. But he shrugged it off and kept working. He had no hope of winning the Academy Award now that his Godfather was no longer able to put pressure on, but getting the nomination had some value.

The record he and Nino had cut, the one of Italian songs, was selling much better than anything he had cut lately, but he knew that it was Nino's success more than his. He resigned himself to never being able to again sing professionally.

Once a week he had dinner with Ginny and the kids. No matter how hectic things got he never skipped that duty. But he didn't sleep with Ginny. Meanwhile his second wife had finagled a Mexican divorce and so he was a bachelor again. Oddly enough he was not that frantic to bang starlets who would have been easy meat. He was too snobbish really. He was hurt that none of the young stars, the actresses who were still on top, ever gave him a tumble. But it was good to work hard. Most nights he would go home alone, put his old records on the player, have a drink and hum along with them for a few bars. He had been good, damn good. He hadn't realized how good he was. Even aside from the special voice, which could have happened to anybody, he was good. He had been a real artist and never knew it, and

never knew how much he loved it. He'd ruined his voice with booze and tobacco and broads just when he really knew what it was all about.

Sometimes Nino came over for a drink and listened with him and Johnny would say to him scornfully, "You guinea bastard, you never sang like that in your life." And Nino would give him that curiously charming smile and shake his head and say, "No, and I never will," in a sympathetic voice, as if he knew what Johnny was thinking.
[truncated: 545,086 more chars]
