# Supplementary material
Source: ML conference proceedings conference paper supplement (https://openreview.net/forum?id=Sxi6gBtJcI)
Supplement: supplementary_material [file the-silence-of-the-lambs-screenplay.docx]

**THE SILENCE OF THE LAMBS**

**by**

**Ted Tally**

**Based on the novel by**

**Thomas Harris**

**This screenplay has been converted to a PDF file by ScreenTalk™** [**http://www.screentalk.org**](http://www.screentalk.org)

**FADE IN:**

**INT. GRUBBY HOTEL CORRIDOR - DAY (DIMLY LIT)**

**A woman's face BACKS INTO SHOT, her head resting against grimy wallpaper. She is tense, sweaty, wide-eyed with concentration. This is CLARICE STARLING, mid-20's, trim, very pretty. She wears Kevlar body armor over a navy windbreaker, khaki pants. Her thick hair is piled under a navy baseball cap. A revolver, clutched in her right hand, hovers by her ear. She raises a speedloader, in her left hand, locks it into her cylinder, twists and reloads.**

**CLOSE ON**

**A guest room door, with a small, wired pack attached to its knob. Suddenly, wish a sharp CRACK!, the knob explodes, and the door bursts open.**

**WITH CLARICE - MOVING SHOT**

**as she runs around a corner, through a cloud of smoke. She shoulders aside the shattered door and rushes inside, gun at the ready in both hands...**

**CUT TO:**

**INT. HOTEL ROOM** - **DAY**

**CLARICE'S POV - MOVING - as she first sees, sitting on the edge of a bed - a FEMALE HOSTAGE. Black, late 20's, gagged, hands behind her back. Then, SWIVELLING... she sees a startled MALE SUSPECT, white, mid-20's, standing by a window with a rifle in his hands. He is turning towards her...**

**Clarice drops into a combat crouch, gun extended, and shouts.**

**CLARICE**

**Freeze! FBI!**

**CLARICE'S POV - SLOW MOTION**

**all natural SOUND suspended - as the Suspect faces her with a strange, pleading expression. The rifle is rising in his hands, but oddly enough, it is held across his chest, not pointing. Then another puzzling detail registers...**

**THE SUSPECT'S HANDS**

**are taped to his gun, away from the trigger; he couldn't use it even if he tried. Suddenly we hear a metallic CLICK, which registers with unnatural amplification, as -**

2.

**Clarice reacts, drops to the floor, rolling sideways, and - THE "HOSTAGE"**

**pulls a revolver out from behind her back, still in SLOW MOTION, raising it in her untied hands. She fires repeatedly, flames leaping from the muzzle; the SOUND is an echoing roar in these close quarters, but -**

**Clarice has come up on one knee, beside an armchair, and is already firing back herself, two quick SHOTS, which send -**

**THE "HOSTAGE"**

**pitching over the bed, backwards, to shudder and lie still in a haze of gunsmoke. Clarice rushes to her, clamping one knee down on her gun hand, still keeping her covered in case of movement. HOLD for a few beats... then we hear the shrill blast of a WHISTLE from somewhere, off screen, as normal ACTION and SOUND are restored.**

**BRIGHAM** (O.S.)

**Okay, people, good exercise...**

**Clarice relaxes, lowering her gun. The lights brighten. PULLING BACK**

**we see that we're in some sort of auditorium, with the "hotel room" and its "corridor" built as a training set. JOHN BRIGHAM walks onto this set, thumbing a stopwatch. Mid-40's, ex-Marine. His T-shirt's lettering says "Firearms Instructor / FBI Academy."**

**BRIGHAM**

**Starling's reaction time was**

**excellent. Let's break. Critique in**

**five.**

**A class of about forty young FBI trainees, of both sexes, begins to rise from their seats, mingling and chatting.**

**Clarice nods amiably to the "Suspect", then gives her "Hostage" a hand up. It's ARDELIA MAPP, her roommate. Her broad, clever face breaks into a big smile, as they both remove ear plugs. Clarice's voice has just a soft trace of southern accent.**

**ARDELIA**

**Damn, Clarice, how'd you make me?**

3.

**CLARICE**

(**indicating her gun**)

**Never cock. Just squeeze.**

**ARDELIA**

(**grins**)

**I love it when you talk dirty.**

**As Brigham joins them, Clarice can't resist a star pupil's little smile of pride. He frowns good-naturedly.**

**BRIGHAM**

**What're you laughin' at, Junior G-Man?**

**She got off four rounds to your two.**

**He takes out a steel-coiled grip flexer, drops it onto her palm.**

**BRIGHAM**

(continuing**)**

**One hundred reps, each hand, every**

**day. Now tidy up, the Section Chief**

**wants to see you.**

**He nods a direction, then moves off. Clarice, with her smile finally fading, looks out into the auditorium.**

**SPECIAL AGENT JACK CRAWFORD**

**sits on the top step of the aisle, looking down at her. He is 53, strongly built. He rises impassively, exits through the back door. He carries a think manila envelope under one arm.**

**Ardelia who is helping Clarice unbuckle her bullet-proof vest, follows her worried gaze.**

**CLARICE**

**What'd I do?**

**ARDELIA**

**Stay cool. Just remember to call him**

**"God."**

**CUT TO:**

**EXT. FBI ACADEMY GROUNDS, QUANTICO, VIRGINIA** - **DAY Crawford is watching a group of trainees on the firing**

**range, as Clarice joins him. He looks tired, haunted. Between master and student, we sense a subtle, muted tug of sexuality.**

4.

**CRAWFORD**

**Starling, Clarice M., good morning.**

**CLARICE**

**Good morning, Mr. Crawford.**

**CRAWFORD**

**Your instructors tell me you're doing**

**well. Top quarter of the class.**

**CLARICE**

**I hope so. They haven't posted**

**anything.**

**CRAWFORD**

**A job's come up and I thought about**

**you. Not really a job, more of - an interesting errand. Walk me to my car, Starling.**

**They begin to cross the academy grounds. A group of trainees jogs by, in matching sweats, following a p.e. coach.**

**CRAWFORD**

(continuing)

**We're trying to interview all of the**

**serial killers now in custody, for a**

**psychobehavioral profile. Could be a**

**big help in unsolved cases. Most of**

**them have been happy to talk to us.**

**They have a compulsion to boast, these people... Do you spook easily,**

**Starling?**

**Not yet.**

**CLARICE**

**CRAWFORD**

**You see, the one we want most refuses to cooperate. I want you to go after him again today, in the asylum.**

**CLARICE**

**Who's the subject?**

**CRAWFORD**

**The psychiatrist - Dr. Hannibal Lecter.**

**Clarice stops walking, goes very still. A beat.**

**CLARICE**

**The cannibal...**

5.

**Crawford doesn't respond, except to study her face.**

**CLARICE**

(continuing)

**Yes, well... Okay, right. I'm glad for**

**the chance, sir, but - why me?**

**CRAWFORD**

**You're qualified and available. And**

**frankly, I can't spare a real agent**

**right now.**

**He walks on again, at a faster clip. She hurried to keep up.**

**CRAWFORD**

(continuing)

**I don't expect him to talk to you, but**

**I have to be able to say we tried...**

**Lecter was a brilliant psychiatrist,**

**and he knows all the dodges.**

(**hands her the manila**

**envelope)**

**Dossier on him, copy of our**

**questionnaire, special ID for you...**

**If he won't talk, then I want straight reporting. How's he look, how's his**

**cell look, what's he writing? The**

**Director himself will see your report,**

**over your own signature - if I decide**

**it's good enough. I want that by 0800**

**Wednesday, and keep this to yourself.**

**They're reached his car. His driver stamps on a cigarette, climbs in behind the wheel. BURROUGHS, his assistant, says something into a walkie-talkie, then opens the back door. But Crawford pulls her aside, a hand on her shoulder. His intensity is scary.**

**CRAWFORD**

(continuing)

**Now. I want your full attention,**

**Starling. Are you listening to me?**

**Yes sir.**

**CLARICE**

**CRAWFORD**

**Be very careful with Hannibal Lecter. Dr. Chilton at the asylum will go over the physical procedures used with him.**

(more)

6.

**CRAWFORD** (cont'd)

**Do not deviate from them, for any**

**reason. You tell him nothing personal, Starling. Believe me, you don't want**

**Hannibal Lecter inside your head...**

**Just do your job, but never forget**

**what he is.**

**CLARICE**

(**a bit unnerved**)

**And what is that, sir?**

**CHILTON** (V.O.)

**Oh, he's a monster. A pure**

**psychopath...**

**CUT TO:**

**INT. CHILTON'S OFFICE - BALTIMORE STATE HOSPITAL FOR THE CRIMINALLY INSANE** - **DAY**

**CLOSE ON an ID card held in a male hand. Clarice's photo, official-looking graphics. It calls her a "Federal Investigator."**

**CHILTON** (O.S.)

**It's so rare to capture one alive.**

**From a research point of view, Dr.**

**Lecter is our most prized asset...**

**DR. FREDERICK CHILTON looks up from her card. A smarmy little peacock, behind a vast desk; he's conceived an instant, hopeless letch for Clarice. He smiles, stroking her card with his beloved gold pen.**

**CHILTON**

**You know, we get a lot of detectives**

**here, but I must say, I can't ever**

**remember one so attractive...**

**NEW ANGLE - REVEALS CLARICE**

**now wearing a more feminine skirt suit. Hair neatly coiled, elegant shoulder bag, briefcase. He has rudely left her standing.**

**CHILTON**

**Will you be in Baltimore overnight...?**

**Because this can be quite a fun town,**

**if you have the right guide.**

**Clarice tires, unsuccessfully, to hide her distaste for him.**

7.

**CLARICE**

**I'm sure it's a great town, Dr.**

**Chilton, but my instructions are to**

**talk to Lecter and report back this**

**afternoon.**

**CHILTON**

(**pause, sourly**)

**I see.**

(**beat)**

**Let's make this quick, then. I'm busy.**

**CUT TO:**

**INT. ASYLUM CORRIDOR - UPPER FLOOR** - **DAY**

**Clarice flinches as a heavy steel gate CLANGS shut behind her, the bolt shooting home. Chilton walks ahead of her.**

**CHILTON**

**Lecter carved up nine people - that**

**we're sure of - and cooked his**

**favorite bits. We've tried to study**

**him, of course - but he's much too**

**sophisticated for the standard tests.**

**And my, does he hate us! Thinks I'm**

**his nemesis... Crawford's very clever,**

**isn't he? Using you.**

**CLARICE**

**How do you mean, Dr. Chilton?**

**CHILTON**

**A pretty young woman, to turn him on?**

**I don't believe Lecter's ever seen a**

**woman in eight years. And oh, are you**

**ever his "taste" - so to speak.**

**CLARICE**

**I graduated magna from UVA, Doctor.**

**It's not a charm school.**

**CHILTON**

**Good. Then you should be able to**

**remember the rules.**

**CUT TO:**

**INT. DIFFERENT CORRIDOR - LOWER FLOOR** - **DAY**

**A darker, even grimmer area. Heavy grids over the lights. Distant SLAMMINGS and faint, hoarse SHOUTS. They walk briskly.**

8.

**CHILTON**

**Do not reach through the bars, do not**

**touch the bars. You pass him nothing**

**but soft paper - no pens or pencils.**

**No staples or paperclips in his paper.**

**Use the sliding food carrier, no**

**exceptions. Do not accept anything he**

**attempts to hold out to you. Do you**

**understand me?**

**CLARICE**

**I understand.**

**CHILTON**

**I'm going to show you why we insist on**

**such precautions... On the afternoon**

**of July 8, 1981, he complained of**

**chest pains and was taken to the**

**dispensary. His mouthpiece and**

**restraints were removed for an EKG.**

**When the nurse bent over him, he did**

**this to her...**

**He hands Clarice a small, dog-eared photo. Looking at it, she is stopped in her tracks. This pleases Chilton.**

**CHILTON**

(continuing)

**The doctors managed to re-set her jaw,**

**more or less, and save one of her**

**eyes. His pulse never got over eighty-**

**five, even when he ate her tongue.**

(**pauses, he smiles**)

**I keep him in here.**

**He turns, pushes a button. A steel door BUZZES slowly open, and BARNEY - a big, impassive orderly - awaits them in an anteroom. On its walls: restraints, mouthpieces, Mace, tranquilizer guns.**

**CLARICE**

(**quickly blocking him**)

**Dr. Chilton - if Lecter feels you're**

**his enemy - as you've said - them**

**maybe I'll have more luck by myself.**

**What do you think?**

**CHILTON**

(**annoyed**)

**You might have suggested that in my**

**office, and saved me the time.**

9.

**CLARICE**

**But then I would've missed the**

**pleasure of your company.**

**She holds out the photo. A beat. He grabs it, jaw twitching.**

**CHILTON**

**When she's finished, bring her out.**

**He turns on his heel, goes. Barney smiles reassuringly.**

**BARNEY**

**Hi, I'm Barney. He told you, don't get**

**near the bars?**

**CLARICE**

(**shaking his hand**)

**Clarice Starling. Yes, he did.**

**BARNEY**

**Okay. Past the others, it's the last**

**cell. Stay to the middle. I put out a**

**chair for you.**

**Sensing her tension, he indicates a nearby security monitor.**

**BARNEY**

(continuing)

**I'm watching. You'll do fine.**

**Clarice nods gratefully. She looks down the long corridor, takes a deep breath, walks into it. He watches her go.**

**CUT TO:**

**INT. DR. LECTER'S CORRIDOR** - **DAY**

**MOVING SHOT - with Clarice, as her footsteps ECHO. High to her right, surveillance cameras. On her left, cells. Some are padded, with narrow observation slits, others are normal, barred... Shadowy occupants pacing, MUTTERING... Suddenly a dark figure in the next-to-last cell hurtles towards her, his face mashing grotesquely against his bars as he hisses.**

**DARK FIGURE**

**I c-can sssmell your cunt!**

**Clarice flinches momentarily, but then walks on.**

10.

**DR. LECTER'S CELL**

**is coming slowly INTO VIEW... Behind its barred front wall is a second barrier of stout nylon net... Sparse, bolted- down furniture, many softcover books and papers. On the walls, extraordinarily detailed, skillful drawings, mostly European cityscapes, in charcoal or crayon.**

**Clarice stops, at a police distance from his bars, clears her throat.**

**CLARICE**

**Dr. Lecter... My name is Clarice**

**Starling. May I talk with you?**

**Dr. Hannibal Lecter is lounging on his bunk, in white pajamas, reading an Italian Vogue. He turns, considers her... A face so long out of the sun, it seems almost leached - except for the glittering eyes, and the wet red mouth. He rises smoothly, crossing to stand before her; the gracious host. His voice is cultured, soft.**

**DR. LECTER**

**Good morning.**

**CUTTING BETWEEN THEM**

**as Clarice comes a measured distance closer.**

**CLARICE**

**Doctor, we have a hard problem in**

**psychological profiling. I want to ask**

**for your help with a questionnaire.**

**DR. LECTER**

**"We" being the Behavioral Science**

**Unit, at Quantico. You're one of Jack Crawford's, I expect.**

**I am, yes.**

**CLARICE**

**DR. LECTER**

**May I see your credentials?**

**Clarice is surprised, but fishes her ID card from her bag, holds it up for his inspection. He smiles, soothingly.**

**DR. LECTER**

(continuing)

**Closer, please... clo-ser...**

11.

**She complies each time, trying to hide her fear. Dr. Lecter's nostrils lift, as he gently, like an animal, tests the air. Then he smiles, glancing at her card.**

**DR. LECTER**

(continuing)

**That expires in one week. You're not**

**real FBI, are you?**

**CLARICE**

**I'm - still in training at the Academy.**

**DR. LECTER**

**Jack Crawford sent a trainee to me?**

**CLARICE**

**We're talking about psychology,**

**Doctor, not the Bureau. Can you decide**

**for yourself whether or not I'm**

**qualified?**

**DR. LECTER**

**Mmmmm... That's rather slippery of**

**you, Officer Starling. Sit. Please.**

**She sits in the folding metal desk-chair. He waits politely till she's settled, then sits down himself, faces her happily.**

**DR. LECTER**

(continuing)

**Now then. What did Miggs say to you?**

(**she is puzzled)**

**"Multiple Miggs," in the next cell. He**

**hissed at you. What did he say?**

**CLARICE**

**He said - "I can smell your cunt."**

**DR. LECTER**

**I see. I myself cannot. You use Evyan**

**skin cream, and sometimes you wear**

**L'Air du Temps, but not today. You**

**brought your best bag, though, didn't**

**you?**

**Yes.**

**CLARICE**

(**beat)**

**DR. LECTER**

**It's much better than your shoes.**

12.

**CLARICE**

**Maybe they'll catch up.**

**DR. LECTER**

**I have no doubt of it.**

**CLARICE**

(**shifting**

**uncomfortably)**

**Did you do those drawings, Doctor?**

**DR. LECTER**

**Yes. That's the Duomo, seen from the Belvedere. Do you know Florence?**

**CLARICE**

**All that detail, just from memory...?**

**DR. LECTER**

**Memory, Officer Starling, is what I**

**have instead of view.**

**A pause, then Clarice takes the questionnaire from her case.**

**CLARICE**

**Dr. Lecter, if you'd please consider -**

**DR. LECTER**

**No, no, no. You were doing fine, you'd**

**been courteous and receptive to**

**courtesy, you'd established trust with**

**the embarrassing truth about Miggs,**

**and now this ham-handed segue into**

**your questionnaire. It won't do. It's stupid and boring.**

**CLARICE**

**I'm only asking you to look at this,**

**Doctor. Either you will or you won't.**

**DR. LECTER**

**Jack Crawford must be very busy indeed**

**if he's recruiting help from the**

**student body. Busy hunting that new**

**one, Buffalo Bill... Such a naughty**

**boy! Did Crawford send you to ask for**

**my advice on him?**

**CLARICE**

**No, I came because we need -**

13.

**DR. LECTER**

**How many women has he used, our Bill?**

**CLARICE**

**Five... so far.**

**DR. LECTER**

**All flayed...?**

**CLARICE**

**Partially, yes. But Doctor, that's an active case, I'm not involved. If -**

**DR. LECTER**

**Do you know why he's called Buffalo Bill? Tell me. The newspapers won't say.**

**CLARICE**

**I'll tell you if you'll look at this form.**

(**he considers, then**

**nods)**

**It started as a bad joke in Kansas City Homicide. They said... this one likes to skin his humps.**

**DR. LECTER**

**Witless and misleading. Why do you think he takes their skins, Officer Starling? Thrill me with your wisdom.**

**CLARICE**

**It excites him. Most serial killers keep some sort of trophies.**

**I didn't.**

**DR. LECTER**

**CLARICE**

**No. You ate yours.**

**A tense beat, then a smile from him, at this small boldness.**

**DR. LECTER**

**Send that through.**

**She rolls him the questionnaire, in his sliding food tray. He rises, glances at it, turning a page or two disdainfully.**

14.

**DR. LECTER**

(continuing)

**Oh, Officer Starling... do you think**

**you can dissect me with this blunt**

**little tool?**

**CLARICE**

**No. I only hoped that your knowledge -**

**Suddenly he whips the tray back at her, with a metallic CLANG that makes her start. His voice remains a pleasant purr.**

**DR. LECTER**

**You're sooo ambitious, aren't you...?**

**You know what you look like to me,**

**with your good bag and your cheap**

**shoes? You look like a rube. A well-**

**scrubbed, hustling rube with a little**

**taste... Good nutrition has given you**

**some length of bone, but you're not**

**more than one generation from poor**

**white trash, are you Officer**

**Starling...? That accent you're trying**

**so desperately to shed - pure West**

1. **irginia. What was your father, dear?**
2. **as he a coal miner? Did he stink of**

**the lamp...? And oh, how quickly the**

**boys found you! All those tedious,**

**sticky fumblings, in the back seats of**

**cars, while you could only dream of**

**getting out. Getting anywhere -yes?**

1. **etting all the way - to the F...B...I.**
2. **is every word has struck her like a tiny, precise dart. But she squares her jaw and won't give ground.**

**CLARICE**

**You see a lot, Dr. Lecter. But are you**

**strong enough to point that high-**

**powered perception at yourself? How**

**about it...? Look at yourself and**

**write down the truth.**

(**she slams the tray**

**back at him)**

**Or maybe you're afraid to.**

**DR. LECTER**

**You're a tough one, aren't you?**

**CLARICE**

**Reasonably so. Yes.**

15.

**DR. LECTER**

**And you'd hate to think you were**

**common. My, wouldn't that sting! Well**

**you're far from common, Officer**

**Starling. All you have is the fear of**

**it.**

(**beat)**

**Now please excuse me. Good day.**

**CLARICE**

**And the questionnaire...?**

**DR. LECTER**

**A census taker once tried to test me.**

**I ate his liver with some fava beans**

**and a nice chianti... Fly back to**

**school, little Starling.**

**He steps backwards, then returns to his cot, becoming as still and remote as a statue. Frustrated, Clarice hesitates, then finally shoulders her bag and goes, leaving the questionnaire in his tray. But after just a few steps, as she passes -**

**MIGG'S CELL**

**She sees that creature at his bars again, hissing at her.**

**MIGGS**

**I b-bit my wrist so I c-can diiiieeee!**

1. **-ee how it bleeeeeeeeds?**
2. **he dark figure suddenly flings his palm towards her, and - CLARICE**

**is spattered on the face and neck - not with blood, but with pale droplets of semen. She gives a little cry, touching her fingers to the wetness. Stunned, near tears, she forces herself to straighten up and walk on, fumbling for a tissue. From behind her, Dr. Lecter calls out, very agitated.**

**DR. LECTER** (O.S.)

**Officer Starling... Officer Starling!**

**Clarice slows, stops. She shudders, but makes the very difficult choice to turn, walk back, stand again in front of -**

16.

**DR. LECTER**

**Who's shivering with rage. For an**

**instant his face opens, and we catch**

**a glimpse into hell itself. Then he's**

**composed again.**

**DR. LECTER**

(continuing)

**I would not have had that happen to**

**you. Discourtesy is - unspeakably ugly**

**to me.**

**CLARICE**

**Then please - do this test for me.**

**DR. LECTER**

**No. But I will make you happy... I'll**

**give you a chance for what you love**

**most, Clarice Starling.**

**CLARICE**

**What's that, Dr. Lecter?**

**DR. LECTER**

**Advancement, of course.**

(**beat)**

**Go to Split City. See Miss Mofet, an**

**old patient of mine. M-O-F-E-T... Now**

**go. Go.**

(**a smile)**

**I don't think Miggs could manage again**

**so soon, even if he is crazy - do you?**

**CUT TO:**

**EXT. THE HOSPITAL - PARKING LOT** - **DAY**

**The grim gothic pile of the asylum looms overhead as Clarice rushes out the front doors. She is badly shaken, almost stumbling, as she rubs at her face. She looks around for, and finally, with some relief, spots -**

**HER CAR**

**an old Pinto, parked nearby. This image begins to BLUR... CLOSE ON**

**her face, fighting tears, as the CAMERA begins to WHIRL AROUND her, almost dizzily. She is seeing, in her mind's eye -**

17.

**IN FLASHBACK**

**a screen door banging open, on a wooden porch, and a 10- year old girl - the young Clarice - rushing outside, down the front steps, and running joyfully across her front yard to -**

**MOVING ANGLE - THE GIRL'S POV**

**a car - late 60's vintage - parked in the dirt road. A MAN, Clarice's father, is just climbing out. He's tall, handsome, and has a marshal's badge pinned on his dark suit. He grins, seeing her, and spreads his arms wide as...**

**THE YOUNG CLARICE**

**rushes into them, and he sweeps her up in a hug, spinning her around, the CAMERA SPINNING with them, and capturing both their laughing faces, before we abruptly return to -**

**THE ADULT CLARICE**

**alone in the parking lot, sagging against her car. Her face is buried in her arms, she shoulders shaking. SOUND UPCUT - a steady, rapid series of GUNSHOTS, as we**

**CUT TO:**

**INT. FBI ACADEMY FIRING RANGE** - **DAY**

**Clarice, in a combat stance, and wearing a sound-muffling headset, is squeezing off ROUND after ROUND at**

**A MOVING TARGET**

**The sillouette of a man, approaching along a track. Her shots, tightly grouped, are all finding the center chest. The target stops, quite close to her, still swaying.**

**Clarice stares at it, deftly working her speedloader. Then she puts a final, emphatic shot right through THE FIGURE'S FOREHEAD.**

**CUT TO:**

**INT. FBI ACADEMY LIBRARY** - **NIGHT**

**CLOSE ON a microfilm monitor - a grainy newsphoto of Dr. Lecter, scrawling past, with an accompanying story ("New Horrors in Cannibal Trial"), dated 1980.**

**Clarice is punching keys on the terminal. Other trainees study at nearby tables.**

18.

**She pauses, jotting a note on her pad, as Ardelia comes by, carrying an armful of books.**

**ARDELIA**

**Phone call, Clarice. It's God.**

**CLARICE**

**Thanks, Ardelia.**

**MOVING ANGLE**

**as Clarice rises, grabbing her notebook, and follows Ardelia past high metal bookstacks.**

**ARDELIA**

**You missed Fourth Amendment law.**

**Unlawful seizure, real juicy stuff.**

**Where were you all afternoon?**

**CLARICE**

**Pleading with a crazy man, with come**

**all over my face.**

**Ardelia stares at her, figures it's a put-on, laughs.**

**ARDELIA**

**Damn. Wish I had time for a social**

**life.**

**Clarice grins, as Ardelia indicates a phone receiver resting on the check-out desk, then moves on. Clarice picks it up.**

**CLARICE**

(**on phone**)

**Mr. Crawford?**

**CUT TO:**

**INT. CRAWFORD'S HOUSE - STUDY** - **NIGHT**

**Crawford, in a cardigan, sits in a wing chair in the book- lined study of his suburban home. He turns the pages of Clarice's memo as they talk. His tone is sharp.**

**CRAWFORD**

**I've read your interim memo on Lecter.**

**You sure you've left nothing out?**

19.

**INTERCUTTING**

**CLARICE**

**It's all there, sir, practically verbatim.**

**CRAWFORD**

**Every word, Starling? Every gesture?**

**CLARICE**

(**a bit heatedly)**

**Right down to the kleenex I used.**

(**he is silent)**

**Sir, why? Is something wrong?**

**CRAWFORD**

**He mentioned a name, at the very end. "Mofet..." Any followup on her?**

**CLARICE**

**I spent all evening on the mainframe. Lecter altered or destroyed most of**

**his patient histories, prior to**

**capture. No record of anyone named**

**Mofet. But "Split City" sounded like**

**it might have have something to do**

**with divorce. I tracked it down in the library's catalogue of national yellow pages.**

(**glancing at her**

**notes)**

**It's a mini-storage facility outside Baltimore, where Lecter had his practice.**

**She pauses, expecting some soft of approval for her cleverness.**

**CRAWFORD**

**Well? Why aren't you there right now?**

**CLARICE**

**Sir, that's a field job. It's outside the scope of my assignment. And I've**

**got a test tomorrow on -**

**CRAWFORD**

**Do you recall my instructions to you, Starling? What were they?**

**CLARICE**

**To complete and file my report by 0800 Wednesday. But sir -**

20.

**CRAWFORD**

**Then do that, Starling. Do just**

**exactly that.**

**CLARICE**

**Sir, what is it? There's something**

**you're not telling me.**

**CRAWFORD**

(**beat)**

**Miggs has been murdered.**

**CLARICE**

(**startled, upset)**

**Murdered...? How?**

**CRAWFORD**

**The orderly heard Lecter whispering to him, all afternoon, and Miggs crying.**

**They found him at bed check. He'd swallowed his own tongue... Chilton is scared stiff the family will file a civil rights lawsuit, and he's trying to blame it on you. I told the little prick your conduct was flawless**.

(**beat)**

**Starling...?**

**CLARICE**

**I'm here, sir, I just - I don't know**

**how to feel about it.**

**CRAWFORD**

**You don't have to feel any way about**

**it. Lecter did it to amuse himself.**

**Why not, what can they do? Take away**

**his books for awhile, and no jello...**

(**a bit softer)**

**I know it got ugly today. But this is**

**your report, Starling - take it as far**

**as you can. On your own time, outside**

**of class. Now carry on.**

**ANGLE ON CLARICE**

**as we hear the loud CLICK of Crawford hanging up. She stares at her receiver, stung by his abruptness.**

**CLARICE**

**Well God damn it! You old creep.**

**Creepo son of a bitch. Let Miggs**

**squirt you and see how you like it.**

21.

**She slams her receiver into its cradle.**

**ANGLE ON CRAWFORD**

**as he flips aside her memo, then rises, wearily. He leaves his study, flicking off the lamp, and pads away in his slippers.**

**CUT TO:**

**INT. CRAWFORD'S BEDROOM** - **NIGHT**

**A private nurse, in white, stands marking a clipboard chart, as Crawford enters his tidy bedroom.**

**CRAWFORD**

**I'll take over, Patricia. You get some**

**rest.**

**The nurse nods, hands him the chart, and goes. He glances at it, then sets it aside. He crosses to -**

**BELLA CRAWFORD**

**who lies in an elevated hospital bed. Nearby are an oxygen tank and mask, floral arrangements. Her breathing is shallow, very labored. Crawford looks down at his comatose wife for a long moment, tenderly brushes a strand of her hair back into place, then bends over to kiss her forehead. SOUND UPCUT - THUNDER and RAIN...**

**DISSOLVE TO:**

**EXT. "SPLIT CITY MINI-STORAGE" - DUSK (RAINING)**

**An orange neon sign, streaked with rain, identifies out location. It looms over a hurricane fence, topped with barbed wire. Inside, row on row of garage-sized, cinderblock sheds.**

**MR. YOW** (V.O.)

**Unit 31 was leased for ten years. Pre-**

**paid in full... The contract is in the**

**name of "Miss Hester Mofet."**

**CUT TO:**

**EXT. STORAGE UNIT NUMBER 31** - **DUSK**

**Clarice, kneeling before a closed, roll-up metal door, takes a FLASH photo of its sealed padlock. EVERETT YOW, a fat, 60ish Chinaman, holds an umbrella over them both. He looks unhappy.**

22.

**CLARICE**

**So no one's been in here since - 1980?**

**She opens the padlock, using a fat ring of tagged keys, then sets aside both keys and lock.**

**MR. YOW**

**Not to my knowledge. Privacy is a**

**great concern to my customers. But, if**

**you say this is an FBI matter...**

**CLARICE**

**I won't disturb anything, Mr. Yow, I**

**promise. Be gone before you know it.**

**Slinging her camera over a shoulder, she tugs at the handle, but the door won't budge. Another tug, harder - no good. Mr. Yow stoops to help, puffing hard, but it's firmly stuck. He sighs.**

**MR. YOW**

**We could return tomorrow, with my son.**

**Or perhaps some workmen...?**

**Clarice crosses to her Pinto, which faces the shed, reaches in to turn on her headlights. Mr. Yow blinks in the sudden brightness. Then she opens her truck, rummaging inside, and returns with a bumper jack, a flashlight, and a rubber floor mat.**

**CLARICE**

**Would you hold these, please?**

**She gives him her flashlight and camera, drops the mat on the ground, then sets the bumper jack in place, under the center of the door. She pumps on the jack handle as the door SQUEALS slowly up, but it won't go higher than about 18 inches, despite all her exertions. She spreads out the rubber mat on the cement, takes the flashlight from Mr. Yow, then lies on the mat.**

**CUT TO:**

**INT. THE STORAGE SHED - DUSK (VERY DARK)**

**Clarice, backlit, peers under the door. She reaches in, makes a sweep with her flashlight. We catch shadowy outlines - boxes, then the flattened tires of a car... SOUND of rain on the tin roof, and other noises, too - small RUSTLINGS. Mr. Yow's chubby face appears down beside Clarice's.**

23.

**MR. YOW**

**It smells like mice... I think I hear**

**them, too - don't you?**

**Clarice turns onto her back, starts squirming under the door.**

**MR. YOW**

(continuing)

**You're going in there?**

**CUT BACK TO:**

**EXT. STORAGE UNIT NUMBER 31** - **DUSK**

**Clarice pulls her head back out again, reaching to take her camera from him. She hands him a card, trying to appear nonchalant.**

**CLARICE**

**Mr. Yow, if this door should fall**

**down -ha ha! - or anything else -**

**would you be kind enough to call this**

**number? It's our Baltimore field**

**office. They know you're here with**

**me... Do you understand?**

**MR. YOW**

**Might I suggest tucking your pants**

**into your socks? To prevent mouse**

**intrusion.**

**CLARICE**

(**beat)**

**Good idea.**

**CUT BACK TO:**

**INT. STORAGE SHED - DUSK (VERY DARK)**

**Clarice squirms, on her back, through the narrow opening. As she squeezes all the way in, she snags one thigh on the metal edge of the door. She curses softly, shining her flashlight on her ripped khakis - there's a small streak of blood.**

**MR. YOW** (O.S.)

**Okay, Miss Starling?**

**CLARICE**

**Okay, Mr. Yow...**

**She shines her light around. In its narrow beam, we see -**

24.

**CLARICE'S POV - UPWARD, SHIFTING**

**spiderwebs, everywhere... high stacks of cardboard boxes... a few dusty pieces of furniture... the big car, oddly long and tall, covered with a tarp... Suddenly there's a scurrying of loud MUSICAL NOTES. Clarice turns, scared, her beam capturing... an old upright piano.**

**MR. YOW** (O.S.)

**You're playing a piano, Miss Starling?**

**CLARICE**

**That wasn't me.**

**Oh.**

**MR. YOW** (O.S.)

**Clarice crawls a bit further. There's hardly room to stand, but she finally manages to wriggle upright, clawing away cobwebs, next to the car. Holding her light under one arm, she takes several FLASH photos of the shed's interior, ending with the car. Then, slinging her camera over the shoulder, she folds back the tarp, resting it on the roof. The resulting clouds of dust make her cough.**

**THE CAR**

**is an antique beauty, a 1931 Packard. It's very dusty, despite the tarp. Curtains close off the back passenger compartment, but there's a narrow gap in them. More mousy RUSTLINGS.**

**CLARICE**

**peers in through the gap, aiming her flashlight.**

**HER POV - SHIFTING**

**as the thin flashlight beam picks out: the broad back seat... as open album of lacy, old-fashioned Valentines... a crumpled lap rug, on the floor... and then a pair of women's shiny, high-heeled pumps... Above these, the hem of a fancy satin evening gown - and a pair of pale, stockinged legs.**

**Clarice recoils, alarmed, then steadies herself.**

**CLARICE**

**Mr. Yow? Oh Mr. Yow...? It looks like**

**somebody is sitting in this car.**

25.

**MR. YOW** (O.S.)

**Oh my! Oh my... Maybe you better come**

**out now, Miss Starling.**

**CLARICE**

**Not yet! - just wait for me.**

(**under the breath)**

**Maybe in about two seconds.**

**She leans down with her camera, takes a FLASH through the gap, then tries the door handle. Locked. So is the front door. She looks around, aiming her light, and locates a tangle of coat-hangers, sticking out of a carton of bric-a- brac. She pulls out one of these, straightens it quickly, bends the tip into a hook.**

**CLOSE ANGLE**

**as she jams this tool inside the join at the top of the back passenger window, then fishes around till she can snag the inside door latch, pulling up. A satisfying CLICK.**

**Clarice opens the door - it hits stacked boxes, and won't open far -then very cautiously leans inside, aiming her flashlight.**

**HER POV - MOVING LIGHT BEAM**

**revealing more of the evening gown... a pair of hands, in white, elbow-length gloves - one rests on the lap, the other atop a large, beaded, drawstring evening bag... thick strands of costume pearls over the breasts... and finally the white neck stub of a female mannequin. No face or head.**

**CLARICE**

**sighs with relief. She takes a couple more FLASHES, then very carefully lifts out the Valentine album, holding it by the corners, and setting it atop the car. Then she eases herself inside, onto the back seat, as the springs SQUEAK loudly.**

**ONE GLOVED HAND slides off the lap, brushing Clarice's thigh.**

**Clarice starts a bit, then pokes at the gloved arm, hard. She peels back a bit of glove, revealing the white, synthetic elbow. She smiles, shaking her head at her own jumpiness, as she reaches over the mannequin's lap to loosen the evening bag's drawstring.**

26.

**A SEVERED HUMAN HEAD stares back at her, as the beaded material slides away.**

**Clarice lurches back, gasping loudly, and several long, heart-pounding moments pass before she can make herself look more closely.**

**The head bobs gently in a pool of alcohol, in a laboratory specimen jar. It is a man's head, but grotesquely transformed, by the addition of heavy makeup, earrings, and a sodden wig, into a woman's face. Over the years the makeup has smeared badly, and the pupils have gone almost milky white.**

**CLARICE**

**staring at this terrible thing, is pleased to find herself quickly regaining control. She murmurs to herself.**

**CLARICE**

**Well, Toto, we're not in Kansas**

**anymore.**

**CUT TO:**

**EXT. QUINN'S HOSPITAL - PARKING LOT - NIGHT (RAINING)**

**A loud clap of THUNDER, as a flash of LIGHTNING illuminates the eerie towers and barred windows of the asylum.**

**MOVING ANGLE on Clarice as she climbs from her car, runs through heavy rain towards the main entrance, where a guard admits her.**

**CUT TO:**

**INT. DR. LECTER'S CELL AND CORRIDOR - NIGHT (DIM LIGHT) On a noiseless TV screen, an evangelist rants, waving his**

**arms. Behind him, a swaying choir in gaudy robes.**

**CLARICE** (O.S.)

**It's an anagram, isn't it, Doctor?**

**PAN TO Clarice, with her wet hair plastered flat, sitting on the corridor floor to one side of this TV, which has been stationed so that Dr. Lecter cannot avoid seeing it.**

**CLARICE**

**Hester Mofet... "The rest of me." Miss The-Rest-of-Me... Meaning, you rented**

**that place.**

27.

**HER POV**

**he's lost in shadows; we can't see him. He doesn't respond. CUTTING BETWEEN THEM**

**Clarice and the darkened call - as she tries again.**

**CLARICE**

**You put those - things in there. Paid**

**for it in advance, ten years ago...**

**Why, Dr. Lecter?**

**The food carrier suddenly SWISHES out of the cell, making her jump up. In its tray is a clean, folded white towel. She hesitates, then crosses, takes this.**

**CLARICE**

(continuing)

**Thank you.**

**She sits again, rubbing her wet hair. When he finally speaks, he's on the floor, too - a deeper, hunching darkness in the shadows, occasionally striped by the flickering TV light.**

**DR. LECTER**

**Your bleeding has stopped.**

**CLARICE**

**How did -**

(**she stops herself)**

**It's nothing. A scratch.**

**DR. LECTER**

**Why don't you ask me about Buffalo**

**Bill?**

**CLARICE**

(**surprised, a beat)**

**Why? Do you know something about him?**

**DR. LECTER**

**I might if I saw the case file. You**

**could get that for me.**

**CLARICE**

**Why don't you tell me about "Miss**

**Mofet?" You wanted me to find him. Or**

**do I have to wait for the lab?**

28.

**DR. LECTER**

(**sighs)**

**His real name is Benjamin Raspail. A former patient of mine, whose romantic attachments ran to, shall we say, the exotic...? I didn't kill him, merely tucked him away. Very much as I found him, in that ridiculous car, in his own garage, after he's missed three appointments. You'd have him under "Missing Person" - which, in poor Raspail's case, could hardly be more true.**

**CLARICE**

**If you didn't kill him, then who did?**

**DR. LECTER**

**Who can say...? Best thing for him, really. His therapy was going nowhere.**

**CLARICE**

**Wouldn't it have been easier to just leave him for the police to find?**

**DR. LECTER**

**And have them clomping about in my life? Oh dear, no... At that time I still had certain private amusements of my own.**

(**beat)**

**How did you feel when you saw him, Clarice? May I call you Clarice?**

**CLARICE**

**Scared, at first. Then - exhilarated.**

**DR. LECTER**

**Ahhh... Why?**

**CLARICE**

**Because you weren't wasting my time.**

**DR. LECTER**

**Do you have something you use, when you need to get up your courage? Memories, tableaux... scenes from your early life?**

**CLARICE**

**I don't know. Next time I'll have to check.**

29.

**DR. LECTER**

**Jack Crawford is helping your career,**

**isn't he? Apparently he likes you. And**

**you like him, too.**

**CLARICE**

**I never thought about it.**

**DR. LECTER**

**Your first lie to me, Clarice. How**

**sad. Tell me -do you think Crawford**

**wants you, sexually? True, he's much**

**older, but - do you think he**

**visualizes... scenarios, exchanges...?**

**Fucking you?**

**CLARICE**

**That doesn't interest me, Doctor. And**

**it's the sort of thing Miggs would ask.**

**DR. LECTER**

**Not anymore.**

(**beat)**

**Surely the odd confluence of events**

**hasn't escaped you, Clarice. Crawford**

**dangles you before me. Then I give you**

**a bit of help. Do you think it's**

**because I like to look at you, and**

**imagine how good you would taste...?**

**CLARICE**

**I don't know. Is it?**

**DR. LECTER**

**Or doesn't this all begin to suggest**

**to you a kind of... negotiation?**

**There's something Crawford can give**

**me, and I want to trade for it. I even**

**wrote to him, offering my help. But he**

**hates me, so he won't deal directly.**

**Dr. Lecter slowly turns up the rheostat in his cell. As his lights rise, we see that the cell's been stripped bare. Gone are his books, drawings, mattress - even his toilet seat. She stands, too, startled. They face each other.**

**DR. LECTER**

(continuing)

**Punishment, you see. For Miggs. Just**

**like that gospel program. When you**

**leave, they'll turn the volume way up.**

**Chilton does enjoy his petty torments.**

30.

**CLARICE**

**Who killed Raspail, Doctor...? You**

**know, don't you?**

**DR. LECTER**

**I've been in this room for eight**

**years, Clarice. I know they will**

**never, ever let me out while I'm**

**alive. What I want is a view. I want**

**a window where I can see a tree, or**

**even water. I want to be in a federal institution, away from Chilton - and**

**I want a view. I'll give good value**

**for it. Crawford could do that for me,**

**but he won't. You persuade him.**

**CLARICE**

(**almost a whisper)**

**Who killed your patient?**

**DR. LECTER**

**Oh, a very naughty boy. Someone you**

**and Jack Crawford are most anxious to**

**meet.**

**CLARICE**

**Buffalo Bill...?**

(**incredulous)**

**Bill killed him, all those years**

**ago...? That's impossible.**

**But Dr. Lecter only smiles, enigmatically.**

**DR. LECTER**

**Who is he stalking right now, Clarice?**

**I wonder, don't you? How many more**

**young women will have to die, before**

**you trade with me...?**

**As Clarice stares at him, unsure how to respond -**

**DISSOLVE TO:**

**INT. CATHERINE MARTIN'S APARTMENT - MEMPHIS, TENNESSEE - NIGHT**

**CATHERINE MARTIN takes a long toke from a bong pipe. She is 21, a tall, big-boned, rather fleshy girl with long brown fair. Her head is on the lap of her boyfriend, CODY; they're sprawled on a couch in the den of her well- furnished apartment. The TV in on, with low SOUND.**

31.

**CATHERINE**

**This stuff's givin' me the munchies.**

**Where's that bag of popcorn?**

**CODY**

**Shit. Left the groceries in the car.**

**He starts to rise, but she pushes him back.**

**CATHERINE**

**'S okay, I'll go.**

**She rises, goes out the front door.**

**CUT TO:**

**EXT. PARKING LOT - THE APARTMENT COMPLEX** - **NIGHT Catherine straightens, with her bag of groceries, shutting**

**her car's back door. She sees, a short distance away -**

**A MAN**

**standing at the open rear door of a brown panel truck. His right forearm is in a cast and sling; he is struggling, unsuccessfully, to hoist an armchair into the truck. Parked nearby, other cars, RVs, a boat on a trailer. A thin, breast-high fog fills the lot; arc lights make yellow pools.**

**Catherine hesitates, then crosses towards the man.**

**CATHERINE**

**Help you with that?**

**MAN**

**Would you? Thanks.**

**His voice is odd, strained, very soft. A fog lamp, set on end on the ground, distorts his features from below. We can't get a good glimpse of his face, but his body is plump, above average height; he's in his mid 30's. She sets down the bag, then together they easily lift the chair into the truck.**

**MAN** (O.S.)

**Let's slide it up, you mind?**

**CUT TO:**

32.

**INT. THE PANEL TRUCK** - **NIGHT**

**He climbs inside the truck, ducking under a small hand winch, and grabs the chair. She hesitates again, but climbs in after him; together they slide the chair forward, behind the seats.**

**MAN**

**Are you about a size 14?**

**What?**

**CATHERINE**

(**surprised)**

**Suddenly, in the shadowy dark, he clubs her over the back of her head with his cast. She moans, slumps unconscious, sliding off the armchair to lie on her stomach. He pulls off his cast and sling, tosses them aside, then hops out of the truck, grabs his lamp, climbs back inside, and pulls the door shut. He bends over her face with the lamp. We hear her shallow BREATHING.**

**Good.**

**MAN**

**He peels back the collar of her blouse, reading the size tag.**

**Good.**

**MAN**

(continuing)

**He carefully slits her blouse up the back, with a pair of bandage scissors, peeling apart the two halves. There's no bra strap. He strokes her bare skin delicately, very happily.**

**MAN**

(continuing)

**Gooood...**

**CUT TO:**

**EXT. THE PARKING LOT** - **NIGHT**

**LOW ANGLE - CLOSE - on Catherine's grocery bag, as her blouse is tossed out beside it. SOUND of the truck's motor starting. The truck backs up, one rear wheel knocking over the bag, partly squashing it. Then is drives away, taillights shrinking, as a lone orange rolls slowly away from the bag...**

**DISSOLVE TO:**

33.

**INT. FBI ACADEMY CLASSROOM - QUANTICO** - **DAY**

**CLOSE ON a large video screen, where a BLURRY image gradually sharpens, resolving into two separate pieces of fabric.**

**INSTRUCTOR** (O.S.)

**Electron microscopy reveals fiber**

**"signatures" that are nearly as**

**distinct as fingerprints...**

**Clarice sits at a long table, with other trainees. Ardelia is beside her. Other tables and students in the background. Each trainee has his own microscope. Clarice is tired, but straightens, hearing -**

**INSTRUCTOR** (O.S.)

(continuing)

**Both of these blouses were worn by**

**victims of Buffalo Bill. They were**

**found in two different states, and**

**four months apart. He always slits**

**them up the back, like a funeral**

**suit...**

**ON THE SCREEN**

**successively CLOSER VIEWS of the cut fabric edges, until we are seeing individual threads, big as tree limbs. The cuts match.**

**INSTRUCTOR** (O.S.)

**The bunching you see - this**

**compression - is characteristic of**

**scissor cuts, rather than a single**

**blade. And, as you see - Bill always**

**uses the same pair...**

**ANGLE ON THE DOOR**

**as John Brigham, the gunnery instructor, sticks his head in.**

**BRIGHAM**

**Clarice Starling! Are you in here?**

**CUT TO:**

**INT. HALLWAY - CLASSROOM BUILDING** - **DAY**

**Clarice and Brigham walk briskly down the hall, passing other trainees. He carries a small canvas bag.**

34.

**BRIGHAM**

**Get your field gear, take stuff for overnight. You're goin' with Crawford.**

**Where?**

**CLARICE**

**BRIGHAM**

**Some fishermen in West Virginia found**

**an unidentified girl's body. It's a**

**Buffalo Bill-type situation. Been in**

**the water about a week, and Jack needs somebody that can print a floater.**

**Think you can handle it?**

**CLARICE**

(**thinking quickly)**

**I'll need the big fingerprint kit...**

**and the one-to-one Polaroid, the CU-5,**

**with film packs and batteries.**

**CUT TO:**

**INT. BRIGHAM'S JEEP CHEROKEE - DAY (DRIVING)**

**Brigham steers as they pass hangars, parked planes, an airstrip. Clarice holds a big fingerprint kit and a weekend bag.**

**BRIGHAM**

**Jack's pretty tough on you, isn't he? Impatient...**

**Sometimes.**

**CLARICE**

**BRIGHAM**

**He's got a lot on his mind besides**

**Buffalo Bill... His wife, Bella, is**

**real sick. Comatose... I'm tellin' you**

**about it now, 'cause he may never.**

**Clarice absorbs this in silence as they stop near an ancient, rather dilapidated Beechcraft. Its door is open, the twin props and beacons already turning. Brigham turns to her, holding out his small canvas bag.**

**BRIGHAM**

(continuing)

**You're goin' in the field, so you**

**gotta have full kit. Take this - it's**

**my own...**

35.

**Clarice opens the bag, stares at the big blue gun nestled in its shoulder holster. She looks up at him, touched.**

**BRIGHAM**

(continuing)

**Wear it, don't ever leave it in your**

**purse. Dry fire it whenever you get**

**the chance. And do your exercises.**

**CLARICE**

**I will... I promise.**

**BRIGHAM**

**Listen, I hope you never need a thing**

**I've taught you. But you've got**

**something... Jack sees it, I do too.**

**If you ever need to, you can shoot.**

**She nods, climbs out. Then she looks back in at him. They're both moved by this rite of passage, but a little embarrassed.**

**BRIGHAM**

(continuing)

**Bless you, Starling...**

**CUT TO:**

**INT. BEECHCRAFT PLANE - DAY (FLYING)**

**CLARICE'S POV - Out the plane's window, at the landscape far below. Wisps of cloud, a quilt of farms.**

**Clarice turns from the window, looks at a think folder in her lap. The cover reads "Case File: / BUFFALO BILL." Clarice is moody, distracted. She hesitates, then opens the file, begins to scan.**

**INSERTS - HER POV**

**Police forms, some handwritten... Typed lab reports; we catch words, phrases: "Autopsy Protocols", "Histamine Analysis"... Grainy enlargements of bullet slugs, showing matched grooves... And then a stack of victim photos. The first one, taken from a good distance away, shows a nude female body, face down on a pebbly riverbank, surrounded by bits of litter.**

**Clarice hesitates again, then flips this photo to look at the next. It makes her flinch, just slightly. Quickly she turns through several more photographs, trying hard to concentrate.**

36.

**CRAWFORD** (O.S.)

**He keeps them alive for three days.**

**NEW ANGLE**

**shows Crawford standing over her, swaying with the plane's motion. Behind him, the open cockpit door, the pilot's back. Crawford sits, removing sunglasses. He rubs his eyes.**

**CRAWFORD**

**Why, we don't yet know... There's no**

**evidence of rape or physical abuse**

**prior to death. All the mutilation you**

**see there is post-mortem.**

(**a beat; he glances**

**at her)**

**I'm hot, are you hot? Bobby, it's too**

**damned hot back here...**

**The pilot adjusts a valve. Crawford turns to her again.**

**CRAWFORD**

(continuing)

**So. Three days. Then he shoots them,**

**skins them -usually just the torsos -**

**and dumps them. Each body in a**

**different river, in a different state, downstream from an interstate**

**highway. The water leaves us no**

**fingerprints, fibers, DNA fluids - no**

**trace evidence at all. That's Fredrica**

**Bimmel, the first one...**

**A COLOR PHOTO - IN CLARICE'S HANDS**

**shows a pretty, plump-cheeked brunette, in her high school graduation cap and gown. She smiles at us with touching optimism.**

**CRAWFORD** (O.S.)

**A big girl, like all the rest. Went**

**about 160... Her corpse was the only**

**one he took the trouble to weight**

**down, so actually, she was the third**

**girl found. After her, he got lazy...**

**NEW ANGLE**

**as Clarice stares at the girl's face, moved. Crawford pulls a map from the file, spreads it out. It shows the central and eastern U.S., with widely-spaced, hand-drawn markings.**

37.

**CRAWFORD**

**Blue square for Belvedere, Ohio, where**

**the Bimmel girl was abducted. Blue**

**triangle where her body was found -**

**down here in Missouri. Same marks for**

**the other four girls, in different**

**colors. This new one, today... washed**

**up here.**

(**he marks with a**

**Flair pen)**

**Elk River, in West Virginia, about six**

**miles below U.S. 79. Real boonies.**

**CLARICE**

**There's no correlation at all between**

**where they're kidnapped and where**

**they're found...?**

(**he shakes his head)**

**What if - what if you trace the**

**heaviest-traffic routes backwards from**

**the dump sites? Do they converge at**

**all?**

**CRAWFORD**

**Good idea, but he thought of it, too.**

**We've run simulations, using different**

**vectors and the best dates we can**

**assign. You put it all in the**

**computer, and smoke comes out. No,**

**this one is different. Then one has**

**seen us coming...**

**CUT TO:**

**INT. RENTAL CAR - DAY (DRIVING)**

**Crawford steers, following a highway patrol car along a winding mountain road. Clarice has the file open on her lap. He glances at her, inscrutable behind his sunglasses.**

**CRAWFORD**

**Talk about him, Starling. Tell me what**

**you see.**

**CLARICE**

(**choosing her words**

**carefully)**

**He's a white male... Serial killers**

**tend to hunt within their own ethnic**

**group. And he's not a drifter - he's**

**got his own house, somewhere. Not an**

**apartment.**

38.

**Why?**

**CRAWFORD**

**CLARICE**

**What he does with them - takes privacy... Time, tools... He's in his 30's or 40's - he's got real physical strength, but combined with an older man's self-control. He's cautious, precise, never impulsive... This won't end in suicide, like they often do.**

**Why not?**

**CRAWFORD**

**CLARICE**

**He's got a real taste for it now. And he's getting better at his work.**

**CRAWFORD**

(**a beat; impressed)**

**Maybe you've got a knack for this...**

**I guess we're about to find out.**

**CLARICE**

(**quietly, evenly)**

**Like I have a "knack" for Dr. Lecter?**

**He studies her a few moments, measuring her anger.**

**CRAWFORD**

**Okay, Starling. Let's have it.**

**CLARICE**

**You haven't said a word today about that garage. Or what I found there.**

**CRAWFORD**

**What should I say? You did fine work. We'll wait on the lab.**

**CLARICE**

**You knew. You knew from the start that Lecter held the key to this... But you weren't up front with me. You sent me in to him naked.**

**CRAWFORD**

(**beat)**

**Are you finished?**

39.

**CLARICE**

**He starts this - buzzing in me, in my**

**head. He makes me feel violated... You**

**used me, Mr. Crawford.**

**A shadow of regret passes over his face, but he answers sternly.**

**CRAWFORD**

**Number One. Maybe there's a**

**connection, maybe not. Lying and**

**breathing are the same thing to**

**Lecter. Number Two. If I'd sent you in**

**there with something to hide from him,**

**he'd have known it, instantly. He'd**

**never have trusted you.**

**She starts to answer, then is silent. He is right. By now the two cars are entering a tidy little town - tree-lined streets, wooden houses, one-story shops, mountains in the background. They slow, turn.**

**CRAWFORD**

(continuing)

**Number Three, I didn't bring you along**

**today just because you can do first-**

**rate forensics. If Lecter is becoming**

**part of this case, you've got the most**

**current read on him. And Number**

**Four - you don't have to like me, or**

**the way I do things. But you do have**

**to keep a cool head. Especially now...**

**Because from here on out, you'll know everything I do. Are we straight on**

**that?**

**Clarice nods, silently; it's as close to an apology as she's likely to get. She stares out the windshield.**

**JUST AHEAD OF THEM**

**the highway patrol cruiser noses into a curb, next to other police cars, facing a big white frame house. Its sign reads "Potter Funeral Home." Two troopers climb from the car.**

**Crawford parks too, then kills the engine. He turns to her, removing his sunglasses, gestures to the case file.**

40.

**CRAWFORD**

(**softly**)

**You think about him long enough, you**

**get a feel for him... Then, if you're**

**lucky, out of all the stuff you know,**

**one little part of it tugs at you,**

**tries to get your attention... You let**

**me know when that happens, Starling.**

**Live right behind your eyes, today.**

**Don't try to impose any patterns on**

**this guy. Just stay open and let him**

**show you...**

**One of the troopers, impassive in his sunglasses and hat, peers in through Crawford's window. Crawford nods to him, then turns back to Clarice.**

**CRAWFORD**

(continuing)

**School's out, Starling.**

CUT TO:

**EXT. SIDEWALK OF THE FUNERAL HOME - POTTER, WEST VA. - DAY SOUND of organ music, as Clarice, carrying her fingerprint**

**kit, mounts some steps to the sidewalk. She stops, seeing - COUNTRY PEOPLE**

**in their somber best, filing into the mortuary for a service. The music - "Shall We Gather At The River?" - is issuing from the open double doors. Several of the mourners glance over at her curiously.**

**ANGLE ON CLARICE**

**staring back at the mourners, hearing the music, as a sense memory is triggered in her...**

**IN FLASHBACK - LOW ANGLE, MOVING**

**as we approach, down the aisle of a country chapel, an open wooden coffin. Sad country faces turn, looking at us from the flanking pews. The b.g. organ hymn is "Shall We Gather...?"**

**THE SAD, 10 YEAR-OLD CLARICE**

**in her best dress, is reluctantly approaching the casket. Her hands are held by the plump hands of unseen matrons.**


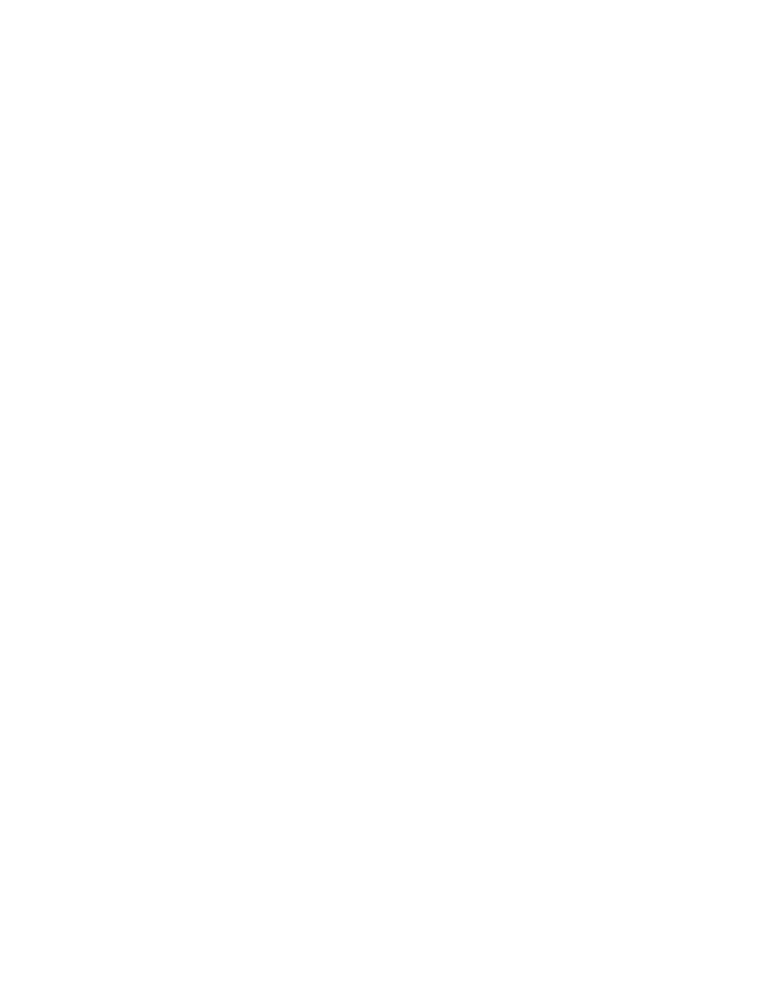


41.

**CHILD'S POV**

**on the looming coffin... closer and closer... until finally she can see, lying inside it... her dead father, arms folded, his marshal's badge still pinned to his lapel.**

**CRAWFORD** (V.O.)

**Starling...?**

**NEW ANGLE (PRESENT DAY)**

**as the grownup Clarice turns towards the impatient Crawford. Like her, he carries a large case.**

**CRAWFORD**

**We're around back.**

**CUT TO:**

**INT. FUNERAL HOME - BACK CORRIDOR** - **DAY**

**A young deputy, several state troopers, and a SHERIFF are all waiting, as Crawford and Clarice enter. The dim, cluttered corridor doubles as storage space - there's a treadle sewing machine, a soft-drink machine, a tricycle. The MUSIC is closer. Crawford shakes hands with the sheriff.**

**CRAWFORD**

1. **heriff Perkins? Jack Crawford, FBI...**
2. **his is Officer Starling. We**

**appreciate your phoning us.**

**SHERIFF**

(**grim, unsociable)**

**I didn't call you. That was somebody**

**from the state attorney's office...**

**'For you do a thing else, I'm gon'**

**find out if this girl's local. It**

**could just be somethin' that outside**

**elements has dumped on us.**

**He casts a sidelong, unhappy glance at Clarice.**

**CRAWFORD**

**Wellsir, that's where we can help. If -**

**SHERIFF**

**I don't even know you, Mister... Now**

**we'll extend you ever courtesy, just**

**soon as we can, but for right now** -

42.

**CRAWFORD**

**Sheriff, this, ah - this type of sex**

**crime has some aspects I'd rather**

**discuss just between the two of us.**

**Know what I mean?**

**He indicates Clarice with his eyes. The sheriff hesitates, nods, then lets Crawford guide him into a small office, closing the door behind them. Muffled WORDS from there.**

**CLARICE**

**burning at this slight, is left alone with the troopers, who peek at her with shy curiosity. She pulls her blazer a bit tighter, self-conscious about her bulging shoulder holster.**

**ANGLE ON THE OFFICE DOOR**

**as, after a few more moments, the sheriff and Crawford emerge. The sheriff, still not very happy, addresses his deputy.**

**SHERIFF**

**Oscar, run fetch Dr. Akin from the**

**chapel. And tell Lamar to come on when**

**he's done playin' that music.**

**CUT TO:**

**INT. EMBALMING ROOM** - **DAY**

**Crawford, in one corner of the room, has set up a Litton Policefax fingerprint transmitter. SOUND of many men's low voices, in background. He is on the phone, and has to speak loudly.**

**CRAWFORD**

**I need a six-way linkup! Chicago,**

**Detroit, Cleveland, St. Louis,**

**Atlanta, and Dallas... What?... Can**

**you hear me...?**

**He looks around, frustrated by the noisy circus atmosphere. CLARICE**

**is pulling on a pair of surgical gloves. She raises her voice, turning up her natural accent by several notches.**

43.

**CLARICE**

**Gentlemen. You officers and gentlemen!**

**Listen here a minute, please. There's**

**things I need to do for her...**

**WIDER ANGLE**

**as we see that the small room is very crowded with deputies and troopers. They gradually fall silent, looking at her.**

**CLARICE** (O.S.)

**Y'all brought her this far, and I know**

**her folks would thank you if they**

**could. Now please - go on out and let**

**me take care of her... Go on, now.**

**The men look at one another, a little bashfully, then begin to to file out, whispering among themselves. As they go, a bright green body bag is REVEALED, tightly zipped, lying on a porcelain embalming table. It is almost the only modern object in this Victorian room, with its glass- paned cabinets and faded wallpaper, decorated with cabbage roses.**

**FAVORING CRAWFORD**

**as he looks at Clarice with a new degree of respect. Men brush by him, till finally only two are left: DR. AKIN, a family g.p., and LAMAR, a lean, whiskey-reddened mortician. SOUND of the door closing. Lamar dabs around his nostrils with Vicks VapoRub.**

**CRAWFORD**

(**on phone)**

**We're starting. Tell everybody to**

**stand by for fingerprint transmission.**

**CLARICE**

**at a side counter, has turned back to her open fingerprint kit. She is lifting out a camera when she hears the ZIPPER of the body bag being slowly opened, behind her... One gloved hand flies to her mouth as she reacts, involuntarily, to the sudden smell. She blinks at her reflection in the cabinet glass, then steels herself to turn, look at the corpse.**

**Bill...**

**CLARICE**

(**pause; softly)**

44.

**She steadies herself by raising her camera, takes a FLASH photo.**

**LOW ANGLE - LOOKING UP, FROM BENEATH TABLE**

**as Dr. Akin gently lifts aside one of the dead girl's arms. A piece of fishing line, with multiple hooks, is still snagged around it, dangling. Crawford leans in for a closer look.**

**DR. AKIN**

**Wrongful death... She'll have to go to**

**the state pathologist at Claxton when**

**you're done.**

(**Crawford nods)**

**I better - get on back for the rest of**

**that service. Lamar'll help you.**

(**shaken)**

**Lord almighty...**

**He leaves, and Clarice leans INTO SHOT, taking another photo.**

**CRAWFORD**

**What do you see, Starling?**

**CLARICE**

**Well, she's not local. Her ears are**

**pierced three times each, and she's**

**wearing green glitter nail polish.**

**Looks like town to me...**

**CLOSE ANGLE**

**on the calf of one of the girl's legs, as Clarice trails the inside of her bare wrist along the skin.**

**CLARICE** (O.S.)

**She waxed her legs, I think... A big**

**girl, just like the others - but she**

**was careful about her appearance...**

**UPWARD ANGLE AGAIN**

**as Lamar joins them for a closer look.**

**CLARICE**

**Two of the fingernails are broken off,**

**and there's - dirt or grit under the**

**others. She tried to claw her way**

**through something... I'll scrape out**

**samples after I've printed her.**

45.

**She takes another FLASH, then quickly reloads film.**

**LAMAR**

**Them fishhooks are set too close**

**together. No wonder the Franklin boys**

**was scared to say they found her.**

**CLARICE**

**Think they were runnin' a trotline?**

**Crawford and Lamar both look at her curiously.**

**CLARICE**

(continuing; **to**

**Crawford)**

**It's a Fish and Game violation. Like**

**poaching. There's a big fine.**

**LAMAR**

**Right... Are you from around here?**

**CLARICE**

**They do it lots of places.**

**CRAWFORD**

**Get photos of her teeth. Then we'll**

**fax her fingerprints to Washington,**

**try to trace her through Missing**

**Persons.**

**SIDE ANGLE - CLOSE ON THE DEAD GIRL'S FACE**

**staring blue eyes, short reddish hair. Clarice sets the Polaroid, with its special attachments, against the face, while Lamar gently retracts the lips. Each time the camera FLASHES, there's a bright glow inside the cheeks.**

**NEW ANGLE - CHEST HIGH**

**as Clarice examines a developing print.**

**CLARICE**

**She's got something in her throat.**

**She hands the print to Crawford; he and Lamar look at it, as she searches in her kit.**

**LAMAR**

**When a body comes out of the water,**

**alots of times there's like, leaves**

**and things in the mouth.**

46.

**Clarice holds up a pair of forceps. She glances at Crawford, who nods. She bends over, partially OUT OF SHOT, and after a few moments reappears, holding up a small, brown cylindrical object. She turns this in the air, as they all stare.**

**CRAWFORD**

**What is it - some kind of seed pod?**

**LAMAR**

**Nawsir, that's a bug cocoon. But how**

**come that to get way down in there?**

**'Less somebody shoved it in...**

**Clarice and Crawford exchange a glance.**

**CRAWFORD**

**She'll be easier to print if we turn**

**her over. Lamar, will you give me a**

**hand?**

**LAMAR**

**Yessir, I will.**

**Clarice takes a jar from her kit, carefully drops the cocoon inside. SOUND of the men's heavy efforts as they turn over the body, off screen. She seals the jar, staring into it at the cocoon.**

**CRAWFORD** (O.S.)

**Starling - what do you make of these?**

**She turns to look.**

**HER POV**

**low on the corpse's back, over the shoulders, two neat, triangular patches of skin are missing.**

**NEW ANGLE - TWO SHOT**

**as Clarice looks at Crawford.**

**CLARICE**

**I don't know. I didn't see those on**

**any of the other girls...**

**CRAWFORD**

**They weren't there. Get close-ups.**

**Clarice raises her camera, leans in for another FLASH.**

**CUT TO:**

47.

**EXT. BACK STEPS OF THE FUNERAL HOME** - **DAY**

**Clarice sits outside, with her head on her knees, drained. She looks up wanly as Lamar appears, offers her a can of Coke.**

**CLARICE**

**Thanks, I'm not thirsty.**

**LAMAR**

**No, hold it under your chin, there,**

**and on your temples. Cold'll make you**

**feel better. It does me.**

**She smiles, touched, and takes the can. When Lamar sees Crawford coming outside, he tactfully departs. Crawford sits beside her; there's a brief silence. She soothes herself with the can.**

**CRAWFORD**

**When I told that sheriff we shouldn't**

**talk in front of a woman, that really**

**burned you, didn't it?**

(**she is silent)**

**That was just smoke, Starling, I had**

**to get rid of him. You did well in**

**there.**

**CLARICE**

**It matters, Mr. Crawford... Other cops**

**know who you are. They look at you to**

**see how to act... It matters.**

**CRAWFORD**

(**beat)**

**Point taken.**

**She looks at him a moment, then offers the can. He opens it.**

**CRAWFORD**

(continuing)

**When we get back, I want you to run**

**that bug by the Smithsonian, see if**

**they can identify it. Maybe it's got**

**some limited range, or it only breeds**

**at certain times of year... You found**

**it, Starling, you deserve the credit.**

48.

**CLARICE**

**I'm wondering if he's done that**

**before - placed a cocoon, or an**

**insect. It would be easy to miss in an**

**autopsy, especially with a floater...**

**Can we check back on that?**

**CRAWFORD**

(**shakes his head)**

**The other girls are in the ground.**

**Exhumations are upsetting for the**

**families. I'll do it if I have to,**

**but -**

**CLARICE**

**Then have the lab check Raspail's head.**

(**he looks at her)**

**Dr. Lecter's patient - have them probe**

**his soft-palette tissues... They'll**

**find another cocoon.**

**CRAWFORD**

**You seem pretty sure of that.**

**CLARICE**

**Raspail was killed by the same man**

**who's killing these girls. And Lecter**

**knows him. Maybe even treated him...**

**You think so, too, don't you? Or you'd**

**never have sent me to that asylum.**

**He looks at her for a moment, then sips again.**

**CRAWFORD**

**Before we caught him, Lecter had a big**

**psychiatric practice in Baltimore. But**

**he travelled all over the country -**

**teaching, consulting... Christ, even**

**testifying in murder trials. Who knows**

**how many potential psychos he turned**

**loose, just for the fun of it...?**

**DISSOLVE TO:**

**INT. MR. GUMB'S CELLAR - DAY (DIM LIGHT)**

**A shadowy male figure looks down at us, leaning over the edge of a deep hole. He holds a little white poodle in his arms, stroking it. This is MR. GUMB, aka "Buffalo Bill."**


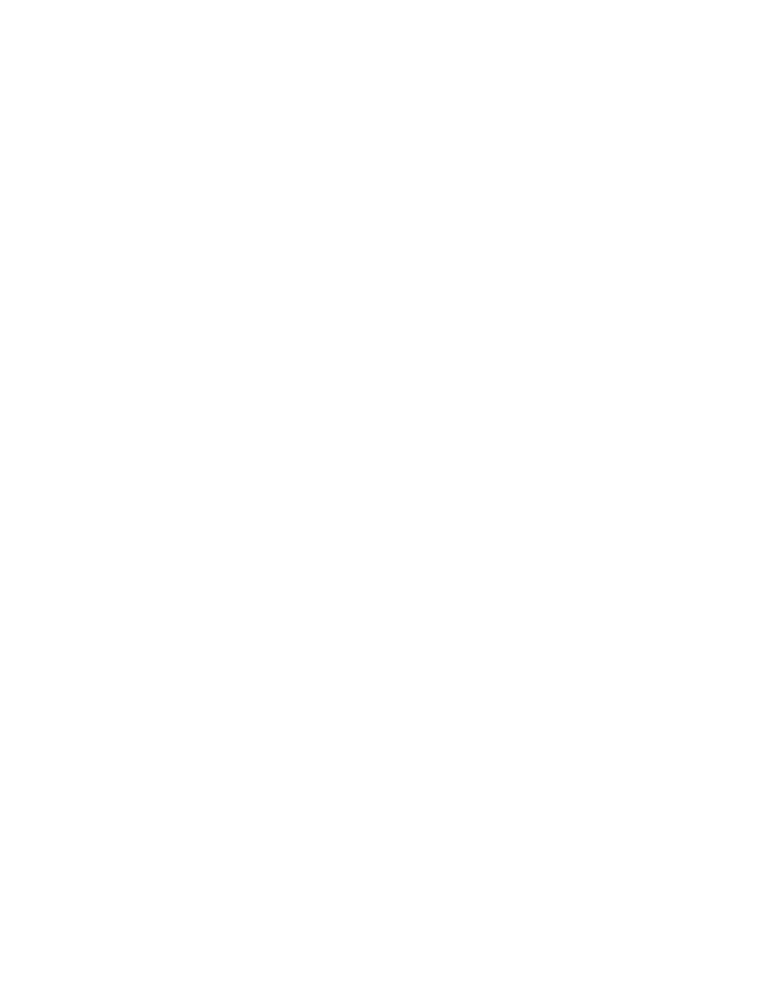


49.

**MR. GUMB**

(**softly)**

**Rub the cream on your skin. Rub it in**

**gooood...**

**CATHERINE MARTIN**

**looks up at him. She is standing on the cement bottom of the pit, or oubliette, about 15 feet below floor level. The pit is bare, except for a futon and a plastic toilet bucket, from which a thin string rises up to the basement. She's soaking wet, in an orange jumpsuit, and holds a squeeze bottle of skin lotion. She struggles to sound calm.**

**CATHERINE**

**Mister... my family will pay cash.**

**Whatever ransom you're askin' for,**

**they -**

**REVERSE ANGLE - UP TOWARDS MR. GUMB**

**MR. GUMB**

**Rub it in! Or you'll get the hose**

**again.**

**The little dog squirms in his arms, BARKING excitedly.**

**MR. GUMB**

(continuing)

**Yes, it will, Precious, won't it? It**

**will get the hose!**

**SIDE ANGLE - AT PIT BOTTOM**

**as Catherine kneels, turning slightly away from him.**

**CATHERINE**

(**under her breath)**

**Oh God... oh God...**

**She unzips her jumpsuit, part-way, then squeezes some of the lotion onto a palm. She reaches inside her suit, rubs it on.**

**CATHERINE**

(continuing)

**Mister, if you let me go, I won't**

**press charges, I promise. You've only**

**has me here a couple days, and -**

**MR. GUMB** (O.S.)

**No. Just one day...**


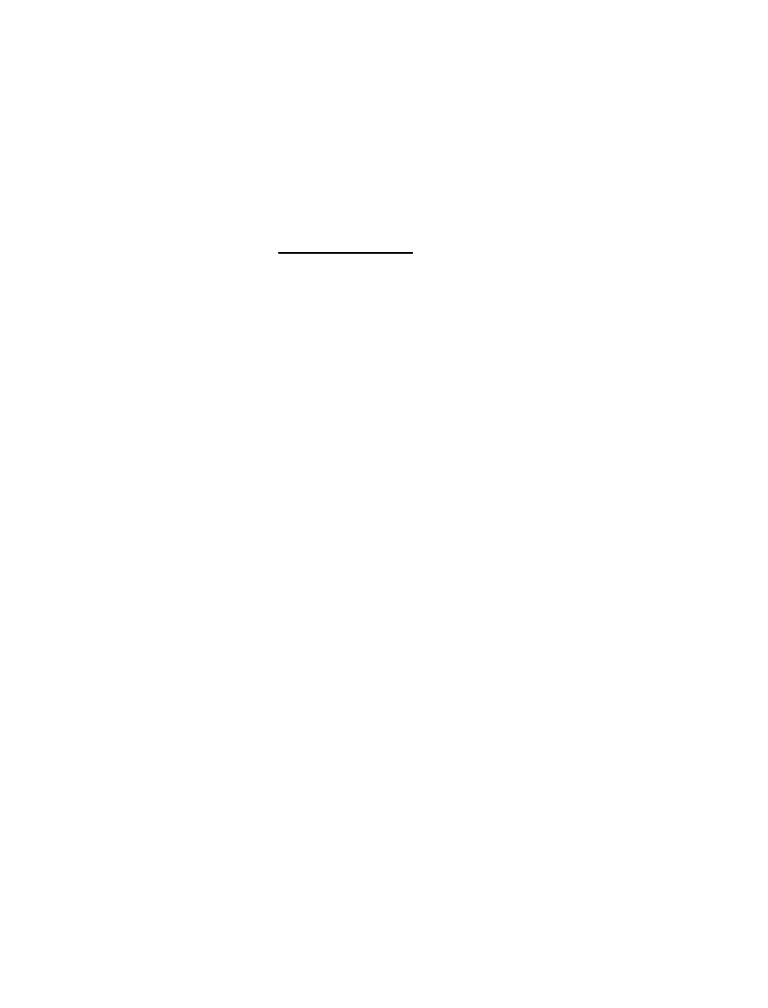


50.

**CATHERINE**

**Is that all...? See - see, my mom is**

**a real important woman... Well, I**

**guess you already know that. She'll**

**pay you, no questions asked. Whatever**

**cause you represent - Iran,**

**Palestine - she'll see that -**

**A sudden blinding glare of light silences her. She looks up, shielding her eyes.**

**HER POV**

**a floodlamp is descending, attached to a small basket.**

**MR. GUMB**

**Put the bottle in the basket. No funny business, or you'll be sorry...**

**NEW ANGLE - CATHERINE**

**as the basket stops, and she steadies it. But as she slips the bottle in, she sees something, O.S., just at the fringe of the light. She hesitates, looks closer... then begins to scream, hysterically, again and again. Her outflung hand hits the lamp, and in its swaying glare, we see - high on the concrete walls, all around her -**

**BLOODY FINGER TRACKS**

**dried now, brownish - left by many pairs of frenzied hands...**

**CUT TO:**

**INT.CLARICE'S DORM ROOM - FBI ACADEMY** - **DAWN**

**Clarice is at her desk, exercising her right hand with the grip flexer, while simultaneously studying a thick law book. Ardelia sticks her head in the door, excited.**

**ARDELIA**

**You better come see this.**

**CUT TO:**

**INT. RECREATION ROOM - FBI ACADEMY** - **DAWN**

**CLOSE ON a TV screen, filled with a photo of Catherine Martin.**

51.

**TV ANCHOR** (V.O.)

**... was listed at first simply as a**

**missing person, but is now believed to**

**have been kidnapped by the serial**

**killer known only as "Buffalo Bill."**

**The photo disappears, replaced by the TV ANCHOR himself.**

**TV ANCHOR**

**Memphis Police sources indicate that**

**the missing girl's blouse has been**

**identified, sliced up the back, in**

**what has become a kind of grim calling**

**card. Young Catherine Martin, as we've**

**said, is the only daughter of U.S.**

**Senator Ruth Martin -**

**CLARICE**

**looks at Ardelia, surprised. Other trainees are drifting into the rec room, some whispering among themselves. Clarice stares back at the TV intently.**

**TV ANCHOR** (O.S.)

**... the Republican junior senator from**

**Tennessee. And while her kidnapping is**

**not at this point considered to be**

**politically motivated, nevertheless it**

**has stirred the government -**

**BACK ON THE TV ANCHOR**

**TV ANCHOR**

**... to its highest levels, the**

**president himself being said to be,**

**and I quote, "intensely concerned."**

**Just moments ago, Senator Martin made**

**this dramatic personal plea...**

**SENATOR MARTIN (TV FOOTAGE)**

**fills the screen, in a halo of lens flare, as she speaks to a jostling crowd of reporters on the front steps of her Georgetown home. A tall woman, late 40's, with a strong, taut face.**

**SEN. MARTIN**

**I'm speaking now to the person who is**

**holding my daughter. Her name is**

**Catherine... You have the power to let Catherine go, unharmed. She's very**

**gentle and kind - talk to her and**

**you'll see. Her name is Catherine...**

52.

**Clarice is moved by what she sees. Other trainees are all around her.**

**CLARICE**

(**whispers)**

**Boy, is that smart...**

**ARDELIA**

**Why does she keep repeating the name?**

**CLARICE**

**Somebody's coaching her... They're**

**trying to make him see Catherine as a**

**person - not just an object.**

**ON THE TV AGAIN**

**SEN. MARTIN**

**You have a chance to show the whole**

**world that you can be merciful, as**

**well as strong. Please - I beg you -**

**release my Catherine...**

**NEW FOOTAGE**

**as we see (NIGHT, TELEPHOTO) - a taped-off section of Catherine's parking lot. Technicians, with instruments, are kneeling by the crushed grocery bag.**

**2ND TV ANCHOR** (V.O.)

**Meanwhile. in Memphis, the**

**investigation continued throughout the**

**night, as state and local authorities**

**were joined at the kidnap scene by**

**agents of the FBI...**

**MOVING ANGLE (STILL TV FOOTAGE)**

**as Jack Crawford is seen striding towards the front door of Catherine's apartment, followed by Burroughs and other agents. One of them moves quickly towards the CAMERA, waving it back.**

**REC ROOM ANGLE - FAVORING ARDELIA**

**as the other trainees send up a brief, ironic cheer. But Ardelia turns sympathetically towards the troubled Clarice.**


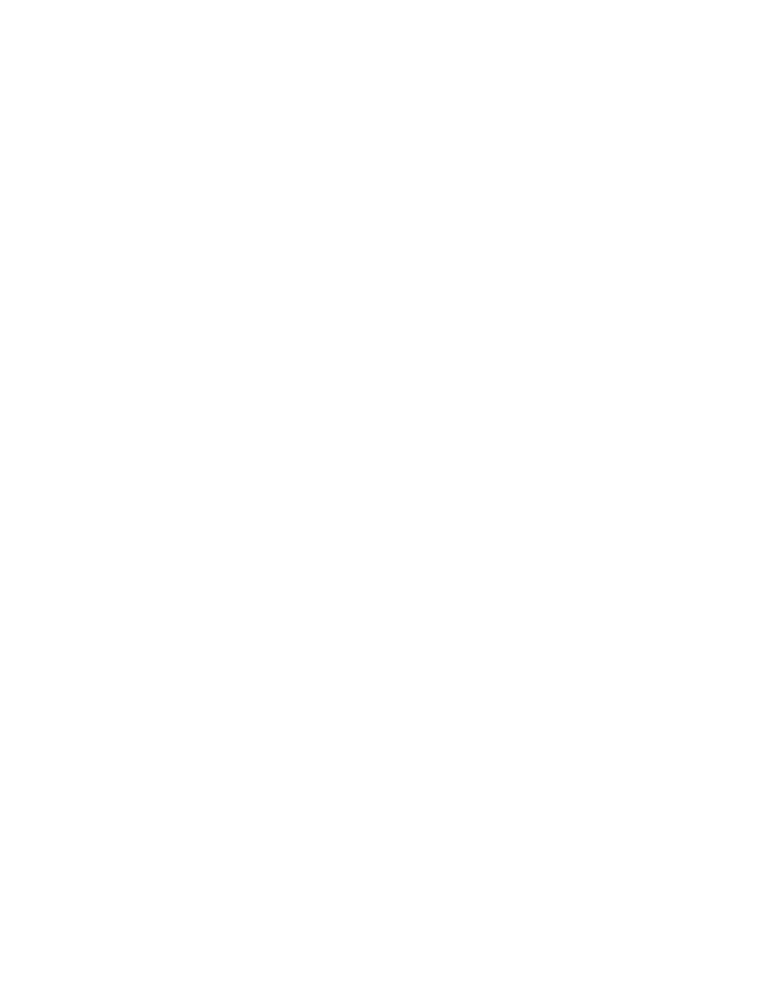


53.

**ARDELIA**

**I don't know whether to say "I'm**

**sorry," or "Congratulations." But**

**girl? - you just went prime time.**

**CUT TO:**

**EXT. SMITHSONIAN - MUSEUM OF NATURAL HISTORY** - **DAY**

**The massive Victorian building looms over Constitution Avenue. Clarice quickly mounts the steps, carrying a small plastic box.**

**CRAWFORD**

**I don't think he knew that she's a**

**Senator's child. She's a big girl,**

**Starling, like all the rest. We're**

**going on the theory she was randomly**

**targeted by size...**

**CUT TO:**

**INT. MUSEUM CORRIDOR** - **DAY**

**Clarice, now accompanied by a museum guard, walks through an eerie landscape of dinosaur bones - crouching skeletons with blank eye sockets, gaping fangs.**

**CRAWFORD** (V.O.)

**By now, Bill's had her for 36 hours.**

**That leaves us just 36 more, before he**

**kills her... But maybe, just maybe,**

**Starling, we caught a real break this**

**time - thanks to you.**

(**beat)**

**We found another bug, in Raspail's**

**head.**

**CUT TO:**

**INT. MUSEUM OFFICE** - **DAY**

**CLOSE ON an live, enormous, rhinoceros beetle, as it weaves its clumsy way among the men on a chessboard, before finally stepping off the edge, onto a lettuce leaf.**

**RODEN** (V.O.)

**Time, Pilch! My move.**

**PILCHER** (V.O.)

**No fair! You lured him with produce.**

54.

**WIDER ANGLE**

**shows two entomologists, both 30ish, hunched over the board. RODEN is a pudgy redhead; PILCHER is lean, quite handsome.**

**RODEN**

**Tough noogies! It's still my turn.**

**CLARICE** (O.S.)

**If the beetle moves one of your men,**

**does that count?**

**They look up, delighted to see Clarice in the doorway. Both men are hopelessly smitten by her.**

**RODEN**

**Of course it counts. How do you play?**

**PILCHER**

(**grins)**

**Officer Starling. Welcome back.**

**CUT TO:**

**INT. ENTOMOLOGY CORRIDOR** - **DAY**

**MOVING ANGLE as Clarice and the two men go briskly down a hall lined with mounted insects, in all shapes and sizes. Roden peers at Clarice's new cocoon, in its box.**

**RODEN**

**Where the hell did this one come from?**

**It's practically mush.**

**CLARICE**

**You really don't want to know.**

**PILCHER**

**Your West Virginia specimen gave us**

**quite a bit of trouble, but I finally**

**managed to narrow his species through**

**chaetaxy - studying the skin.**

**RODEN**

**I'm the one who found his perforating proboscis! Are you wearing a gun,**

**right now?**

(**Clarice nods)**

**Ooh, cool! Can I see it? Can I?**

55.

**PILCHER**

**Just ignore him. He's not a Ph.D.**

**CUT TO:**

**INT. LABORATORY** - **DAY**

**VERY CLOSE (MAGNIFICATION) on the sliced cocoon, as Roden uses tweezers and a dental probe to ease out the sodden chrysalis.**

**RODEN** (O.S.)

**The whole trick is to remove the**

**chrysalis without destroying it... The**

**wings are just like wet tissue paper...**

**THE TWO MEN**

**are hunched over a formica table, peering through square magnifiers into stainless trays. Clarice watches curiously. Of their two specimens, Pilcher's moth is in much better condition - a big brown creature, its wings outspread on towel paper.**

**PILCHER**

(**without looking up)**

**What do you do when you're not**

**detecting, Officer Starling?**

**CLARICE**

**I try to be a student, Dr. Pilcher.**

**PILCHER**

**Ever get out for cheeseburgers and**

**beer? The amusing house wine...?**

**CLARICE**

(**smiles)**

**Not lately. But maybe someday.**

**He looks up at her, shyly. A little moment passes between them, before Roden straightens, exultant.**

**RODEN**

**Positive match!**

**CLARICE**

**You're sure?**


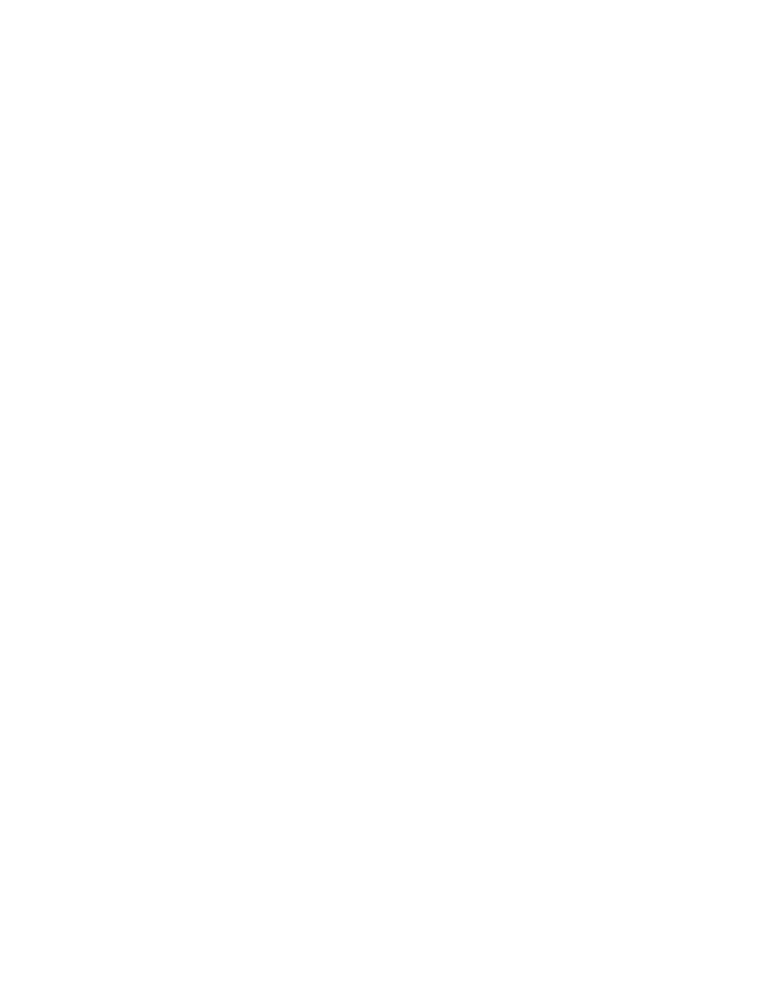


56.

**RODEN**

(**points with his**

**dental probe)**

**West Virginia... Baltimore. Officer**

**Starling, meet Mister Acherontia styx.**

**He moves aside for Clarice to get a closer look at Pilcher's specimen. She leans forward, intently.**

**HER POV (MAGNIFICATION)**

**the wide, furry, brown back of the moth. And there, right between the wing bases - wonderful and terrible to see - is nature's perfect reproduction of a ghostly human skull.**

**RODEN** (O.S.)

**Better known to his friends as the**

**Death's-head Moth...**

**PILCHER** (O.S.)

**The Latin name comes from two rivers**

**in Hell. Your man - he drops these**

**girls into rivers, every time. Didn't**

**I read that?**

**FAVORING CLARICE**

**as she looks up at him, awed, excited, almost trembling.**

**CLARICE**

**And there's no way - no natural way -**

**these could've wound up in the bodies?**

**PILCHER**

(**shakes his head)**

**They live in Malaysia. In this**

**country, they'd have to be specially**

**raised, from imported eggs.**

**CLARICE**

(**pause, then softly)**

**Dr. Lecter...**

**As the two men stare at her, puzzled, we hear a SOUND UPCUT - the wail of police SIRENS - and...**

**CUT TO:**

**EXT. U.S. ROUTE 95 - DAY (AERIAL SHOT)**

**An awesome armada of police vehicles swings through an intersection, while normal traffic is held back by highway patrol cruisers.**

57.

**The lead cars turn off, hit the entrance ramp to the freeway - SIRENS going, tires SQUEALING, red flashers...**

**CLOSER ANGLE**

**on a speeding surveillance van, with long antennas and a small satellite dish, near the head of the motorcade.**

**CRAWFORD** (V.O.)

**Maybe we can trace how he buys the**

**bugs, starting with U.S. Customs...**

**CUT TO:**

**INT. THE SURVEILLANCE VAN - DAY (DRIVING)**

**The van is crammed with an impressive array of hi-tech equipment, all CLICKING and HUMMING. Burroughs is talking quietly on a scrambler phone, while another agent works a computer.**

**CRAWFORD** (O.S.)

**Maybe we can locate some of Raspail's**

**old lovers. Maybe, someday...**

**CLARICE AND CRAWFORD**

**sit in swivel seats at the rear, by a big window. Clarice can't resits an occasional peak at the trailing motorcade, awed and a bit thrilled to be the center of so much attention.**

**CRAWFORD**

**But for Catherine Martin, it all comes**

**down to you and Lecter. You're the one**

**he talks to.**

**CLARICE**

**He's already offered to help... What**

**would happen if we just showed our**

**cards - asked him for Bill?**

**CRAWFORD**

**He offered to help, Starling, not to**

**snitch. That wouldn't give him enough**

**chance to show off. Remember, Lecter**

**looks mainly for fun. Never forget fun.**

**CLARICE**

**But if he knew we have so little time -**

58.

**CRAWFORD**

**If we act too anxious, he'll make us wait. He'll let the Senator keep hoping, day after day, until Catherine finally washes up. That'd be the most fun of all.**

**CLARICE**

**I think he means it, this time. I think he'll deal.**

**CRAWFORD**

**What would it take?**

**CLARICE**

**Transfer to a new prison. With a view of trees, he said, or even water... Can we swing that?**

**CRAWFORD**

(**shakes his head)**

**State to federal jurisdiction... We can do it - eventually - but we'll never get all the clearances in time. Can you convince him a deal's already in place?**

**CLARICE**

**You'll back me up with some paperwork?** (**he nods)**

**Then I'll try. But wouldn't this have more weight coming from the Senator herself?**

**CRAWFORD**

(**hesitates)**

**She doesn't know what we're up to. And we can't afford to let her find out.**

**Clarice looks at him, surprised.**

**CRAWFORD**

(continuing)

**She's the mother, Starling. She can't possibly comprehend what Lecter is. She'd make the mistake of pleading with him. Begging him... He'd feast on her pain till the last second of that girl's life...**

**CUT TO:**


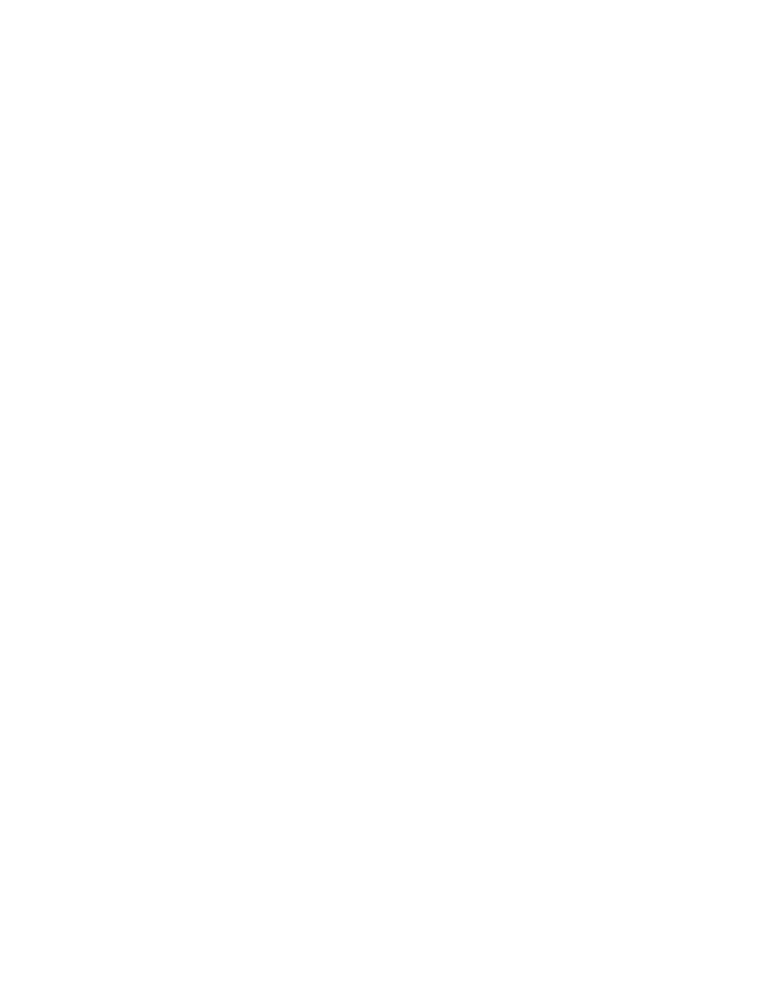


59.

**INT. BALTIMORE STATE HOSP. FOR THE CRIMINALLY INSANE - DAY Chilton approaches, walking briskly down a corridor in the**

**administration wing. He looks quite agitated.**

**CRAWFORD** (V.O.)

**We can't trust Frederick Chilton,**

**either. He's greedy and ambitious. If**

**he knew about Lecter's link to Bill,**

**he's go straight to the newspapers...**

**Chilton falls into step beside Clarice, who has her briefcase. He points his gold pen at her accusingly.**

**CHILTON**

**What you're doing, Miss Starling, is**

**coming into my hospital to conduct an**

**interview, and refusing to share**

**information with me. For the third**

**time!**

**CLARICE**

**Dr. Chilton, I told you - this is just**

**routine follow-up on the Raspail case.**

**CHILTON**

**He's my patient! I have rights!**

(**grabs her arm,**

**stopping her)**

**I'm not just some turnkey, Miss**

**Starling. I shouldn't even be here**

**this afternoon. I had a ticket to**

**Holiday on Ice.**

**She stares at him, with pity and distaste, till he lets go.**

**CLARICE**

**I'm acting on instruction, Dr. Chilton.**

(**handing him a card)**

**This is the U.S. Attorney's number.**

**Now please - either discuss this with**

**him, or let me do my job.**

**She walks away, leaving him speechless with frustration and hostility. He clicks his pen, watching her go.**

**CUT TO:**

**INT. DR. LECTER'S CELL AND CORRIDOR** - **DAY**

**Dr. Lecter sits at his table, languidly sketching with charcoal on butcher paper.**

60.

**He uses his own hand and forearm as a model. His other drawings, books, and bedding have been restored.**

**DR. LECTER**

**Wouldn't you say, Clarice, that for a**

**United States Senator, you're an odd**

**choice of messenger?**

**Clarice, sitting again at the desk-chair, is taking papers from her briefcase.**

**CLARICE**

**I was your choice, Dr. Lecter. You**

**chose to speak to me. Would you prefer**

**someone else now? Or perhaps you don't**

**think you can help us.**

**DR. LECTER**

**That is both impudent and untrue...**

**Tell me, how did you feel when you**

**viewed our Billy's latest effort?**

(**beat; he smiles)**

**Or should I say, his "next-to-latest"?**

**CLARICE**

**By the book, he's a sadist.**

**DR. LECTER**

**Life's too slippery for books,**

**Clarice. Typhoid and swans came from**

**the same God.**

(**beat)**

**Tell me, Miss West Virginia - was she**

**a large girl?**

**Yes.**

**CLARICE**

**DR. LECTER**

**Big through the hips. Roomy.**

**CLARICE**

**They all were.**

**DR. LECTER**

**Mmm. And what else...?**

**CLARICE**

**She had an insect deliberately inserted in her throat. That hasn't been made public yet. We don't know what is means.**

61.

**DR. LECTER**

**Was it a butterfly?**

**CLARICE**

(**pause; staring at**

**him)**

**A moth... How did you predict that?**

**DR. LECTER**

**I'm waiting for your offer, Clarice.**

**Enchant me. Clarice looks down at her**

**papers, taking a moment to collect her thoughts. She looks up at him again,**

**evenly.**

**CLARICE**

**If you help us find Buffalo Bill in**

**time to save Catherine Martin, the**

**Senator promises you a transfer to the**

**V.A. hospital at Oneida Park, New**

**York, with a view of the woods nearby.**

**Maximum security still applies, but**

**you'd have reasonable access to books.**

**He is silent. She rises, moves closer, carrying papers.**

**CLARICE**

(continuing)

**Best of all, though - one week a year**

**you'd get to leave the hospital and go**

**here.**

(**points to a map)**

**Plum Island. Every afternoon of that**

**week you can walk on the beach or swim**

**in the ocean for up to one hour. Under**

**SWAT team surveillance, of course...**

**His face remains neutral. She puts the papers in his food tray.**

**CLARICE**

(continuing)

**Copy of the Buffalo Bill case file,**

**copy of Senator Martin's terms. Her**

**offer is final and non-negotiable. If**

**Catherine dies -**

(**she slides his tray**

**through)**

**You get nothing.**

**A measured beat, before he rises smoothly, crosses, and looks down at the papers, without touching them.**


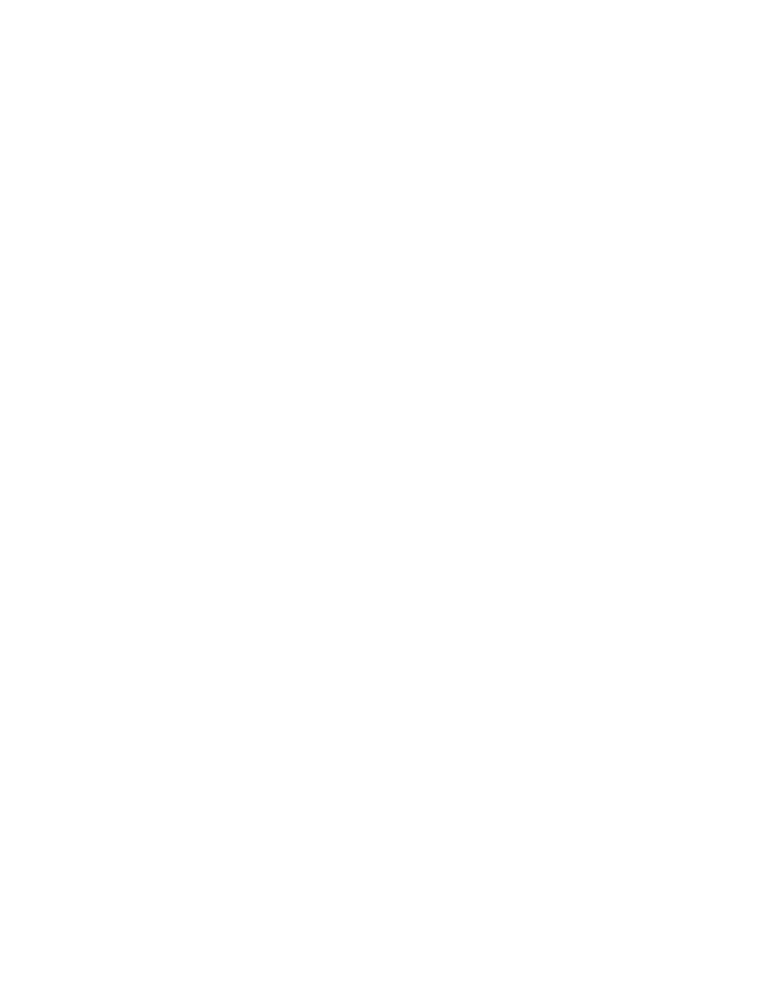


62.

**DR. LECTER**

**"Plum Island Animal Disease Research**

**Center." Sounds charming.**

**CLARICE**

**That's just part of the island. It has**

**a very nice beach. Terns nest there.**

**DR. LECTER**

**Terns... If I help you, Clarice, it**

**will be "turns" with us, too. Quid pro**

**quo. I tell you things, you tell me**

**things. Not about this case, though -**

**about yourself. Yes or no?**

(**she is silent)**

**Yes or no, Clarice. Catherine is**

**waiting. Tick-tock, tick-tock...**

**She looks at him. A beat. They are standing uncomfortably close.**

**CLARICE**

**Go, Doctor.**

**DR. LECTER**

**What's your worst memory of childhood?**

(**she hesitates)**

**Quicker than that. I'm not interested**

**in your worst invention.**

**CLARICE**

**The death of my father.**

**DR. LECTER**

**Tell me. Don't lie, or I'll know.**

**Clarice cannot bear the feverish excitement in his eyes. She looks past him, hesitating again.**

**CLARICE**

**He was a town marshal... one night he**

**surprised two burglars, coming out the**

**back of a drugstore... They shot him.**

**DR. LECTER**

**Killed outright?**

**CLARICE**

**No. He was strong, he lasted almost a**

**month. My mother - dies when I was**

**very young, so my father had become -**

**the whole world to me... After he left**

**me, I had nobody. I was ten years old.**

63.

**DR. LECTER**

**You're very frank, Clarice. I think - it would be quite something to know you in private life.**

**CLARICE**

**Quid pro quo, Doctor.**

**DR. LECTER**

**The significance of the moth is change. Caterpillar into cocoon into beauty... Billy wants to change, too, Clarice. But there's the problem of his size, you see. Even if he were a woman, he'd have to be a big one...**

**CLARICE**

(**puzzled)**

**Dr. Lecter, there's no correlation in the literature between transsexualism and violence. Transsexuals are very passive.**

**DR. LECTER**

**Clever girl. You're so close to the way you're going to catch him - do you**

**realize that?**

**CLARICE**

**No. Tell me why.**

**DR. LECTER**

**After your father's death, you were orphaned. What happened next?**

(**Clarice drops her**

**gaze)**

**I don't imagine the answer's on those second-rate shoes, Clarice.**

**CLARICE**

**I went to live with my mother's cousin and her husband in Montana. They had a ranch.**

**DR. LECTER**

**A cattle ranch?**

**CLARICE**

**Horses - and sheep...**

**DR. LECTER**

**How long did you live there?**

64.

**CLARICE**

**Two months.**

**DR. LECTER**

**Why so briefly?**

**CLARICE**

**I - ran away...**

**DR. LECTER**

**Why, Clarice? Did the rancher fuck you?**

**No.**

**CLARICE**

(**angrily)**

**DR. LECTER**

**Did he try to?**

**CLARICE**

**No...! Quid pro quo, Doctor.**

**DR. LECTER**

**Billy's not a real transsexual, but he thinks he is. He tries to be. He's tried to be a lot of things, I except.**

**CLARICE**

**You said - I was very close to the way we'd catch him.**

**DR. LECTER**

**There are three major centers for transsexual surgery: Johns Hopkins, the University of Minnesota, and Columbus Medical center. I wouldn't be surprised if Billy has applied for sex reassignment at one or all of them, and been rejected.**

**CLARICE**

**On what basis would they reject him?**

**DR. LECTER**

**The personality inventories would trip him up. Rorschach, Wechsler, House- Tree-Person... He wouldn't test like a real transsexual.**

**CLARICE**

**How would he test?**


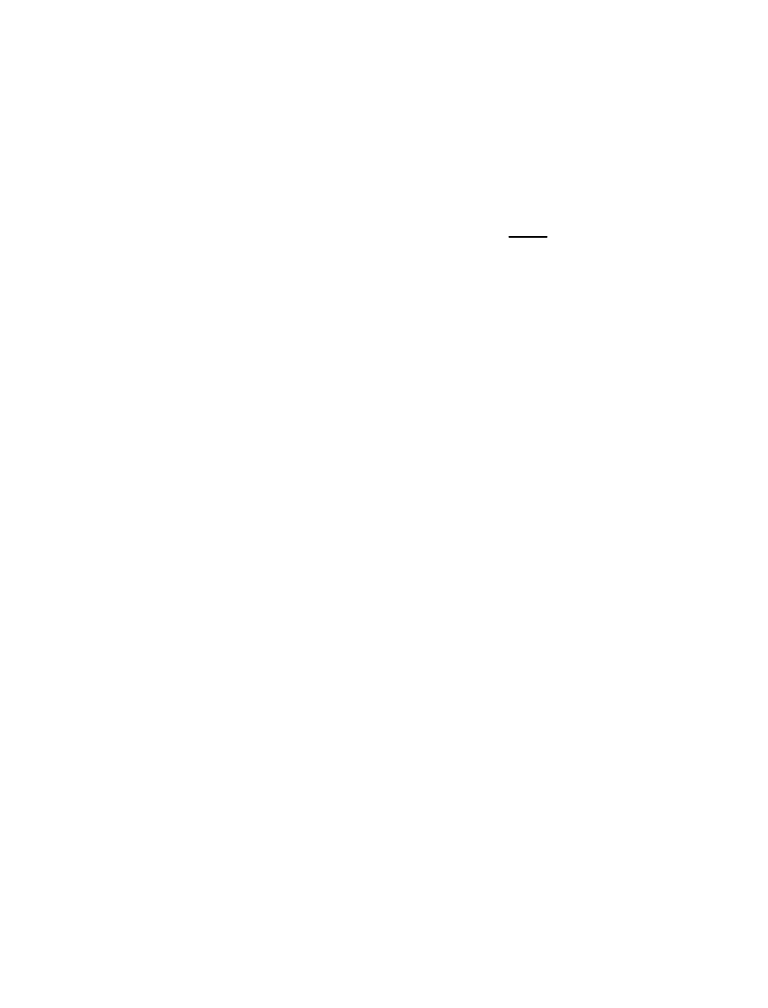


65.

**Suddenly Dr. Lecter snarls, loudly, stretching. Clarice take a sharp step backwards before he smiles, turning his movement into an elaborate yawn. He gathers the papers from his tray.**

**DR. LECTER**

**That's enough, I think. Happy hunting.**

**Oh, and Clarice - next time you will**

**tell me why you ran away. Shall I**

**summarize?**

**CLARICE**

(**shaken)**

**Yes, Doctor. Please.**

**CUT TO:**

**INT. MR. GUMB'S CELLAR** - **DAY**

**VERY CLOSE ON a cocoon, split along its back, as a living Death's-head Moth wriggles torturously free. Trembling and damp, the new creature clings to a sprig of nightshade.**

**DR. LECTER** (V.O.)

**You should try to obtain a list of**

**males rejected from all three gender reassignment centers...**

**PULLING BACK**

**we see a big wire cage, holding several of the moths. They crawl over the humus floor or feed at honeycombs, wings pumping lazily. In the distant background, the incongruous SOUND of show music.**

**DR. LECTER** (V.O.)

**Check first the ones rejected for**

**lying about criminal records...**

**CONTINUOUS MOVING ANGLE**

**at about knee level, as we leave the cage, and begin to TRAVEL through this eerie, dimly-lit warren of a cellar. As we go - occasionally TURNING corners, or skirting the dark openings of unexplored passages - various objects loom briefly INTO VIEW, overhead - a stainless-steel work table... a big sink... jars of chemicals... neat racks of gleaming knives...**


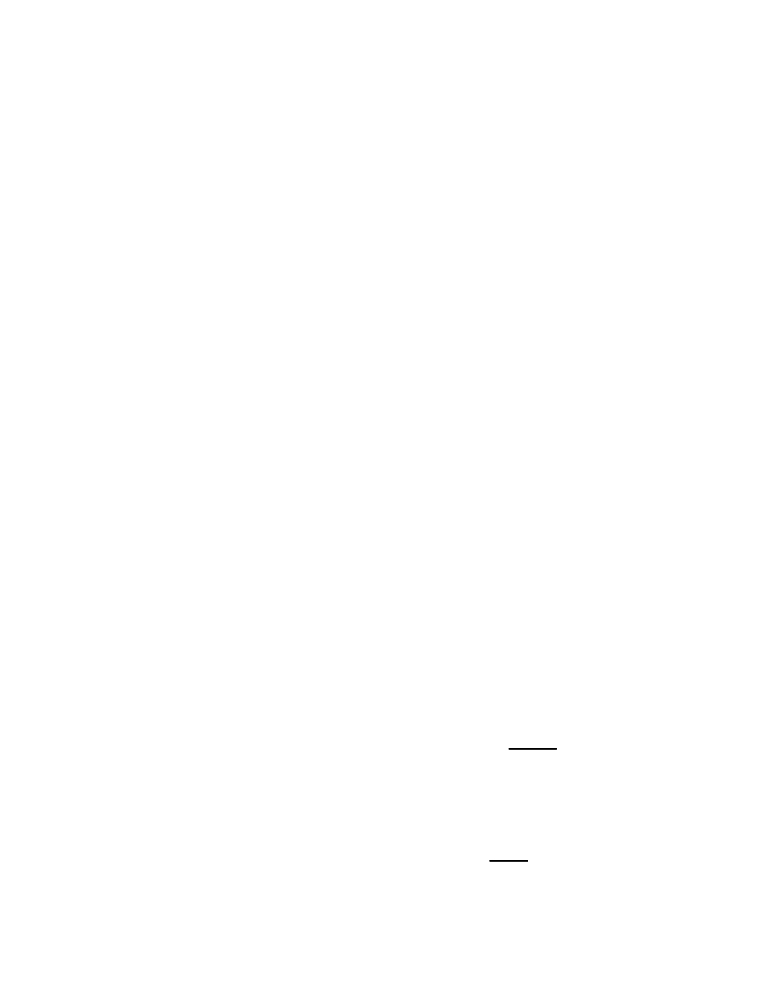


66.

**DR. LECTER** (V.O.)

**Among those who tried to conceal their**

**past, look for severe childhood**

**disturbances, associated with**

**violence... Possibly you'll find a**

**childhood incarceration... Then go to**

**their personality tests...**

**We pass a row of female mannequins, some nude, some wearing colorful leather jackets, designer knockoffs, in various stages of completion... then a huge maroon armoire, in Chinese lacquer; its double doors are slightly ajar... The jaunty background. MUSIC is growing even louder: Fats Waller singing "Bye Bye Baby." And now we hear something else, too - the rapid CLICKING of a sewing machine...**

**DR. LECTER** (V.O.)

(continuing)

**Study their drawings, especially.**

**Billy's house drawings will show no**

**happy future... No baby carriage, out**

**in the yard. No pets, no toys, no**

**flowers, no sun...**

**We TURN another corner, and there is Mr. Gumb himself. As we APPROACH, his wide back is to us; he's hunched over an old-fashioned sewing machine, humming cheerfully, and working a piece of material that we mercifully cannot see. A female wig rests near him on a head form. He wears a hairnet and a beautiful kimono, and pumps the treadle with his bare feet.**

**DR. LECTER** (V.O.)

(continuing)

**His females will be more crudely**

**sketched than him males - but he'll**

**compensate by adding exaggerated**

**adornments... jewelry, big breasts...**

**And his tree drawings - oh, his trees**

**will be frightful...**

**Next to Mr. Gumb is an antique phonograph - source of the MUSIC. His little dog, Precious, perches by his plump ankles. As we PASS Mr. Gumb, Precious scurries away from him, panting happily, and we FOLLOW the little dog down another corridor, the music starting to fade behind us...**


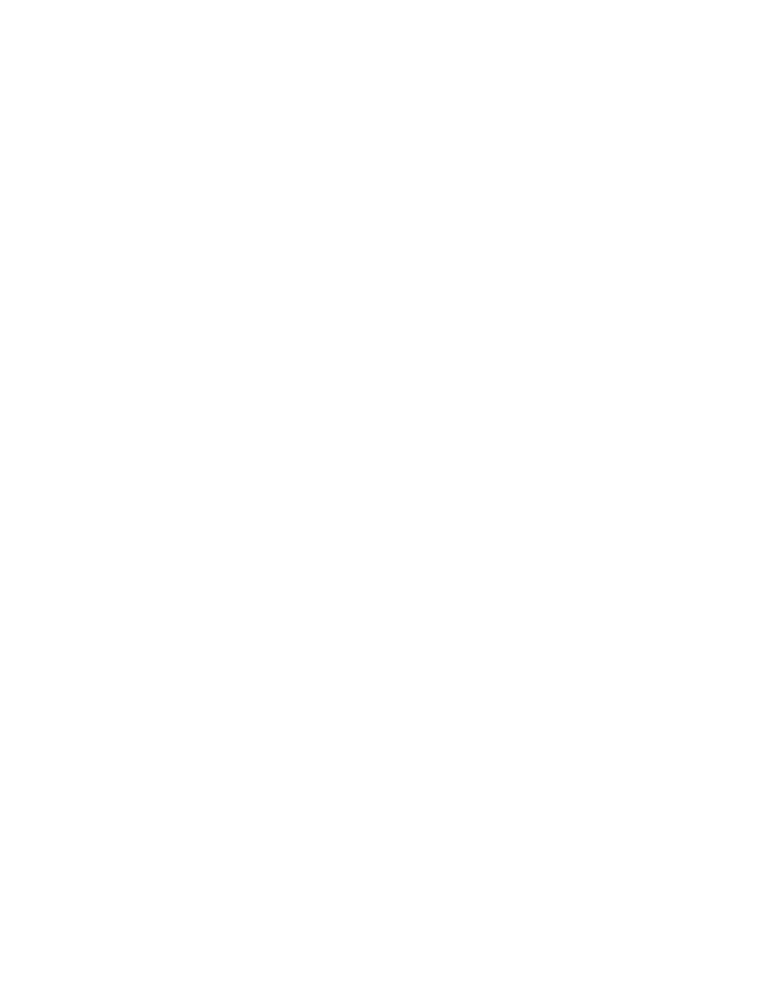


67.

**DR. LECTER** (V.O.)

(continuing)

**Billy hates his own identity, he**

**always has - and he thinks that makes**

**him a transsexual. But his pathology**

**is a thousand times more savage... He**

**wants to be reborn, Clarice. He will**

**be reborn...**

**At the end of this final corridor, the cellar widens into a low-ceilinged chamber, with two additional doorways, and in the center of this is the gaping circle of the oubliette. Precious sniffs her way over to the edge - excited, tail wagging - than BARKS happily as we hear a hoarse, ghostly moan from below.**

CATHERINE (O.S.)

**Pleeeeeeeease.....!**

**DISSOLVE TO:**

**INT. DR. LECTER'S CORRIDOR** - **DAY**

**MOVING ANGLE - CLOSE ON Dr. Lecter's slippered feet, which rest on the shelf of a rolling hand truck. RISING along his tilted form, we see that his ankles are linked by steel restraints... his legs, waist, upper torso, and arms are bound by heavy canvas webbing... beneath the webbing is a strait-jacket... and over his face is a hockey mask.**

**CHILTON** (V.O.)

**Bad news, Hannibal...**

**WIDER ANGLE**

**shows that Dr. Lecter, on the handtruck, is being pushed down his corridor by Barney, and back into his open cell.**

**CHILTON** (V.O.)

**Gourmet magazine has rejected your**

**recipe for braised kidneys...**

**CUT TO:**

**INT. DR. LECTER'S CELL** - **DAY**

**Chilton lounges on Dr. Lecter's cot, casually reading his large stack of private correspondence, and making notations with his gold pen on a little pad. Another orderly mops the floor.**


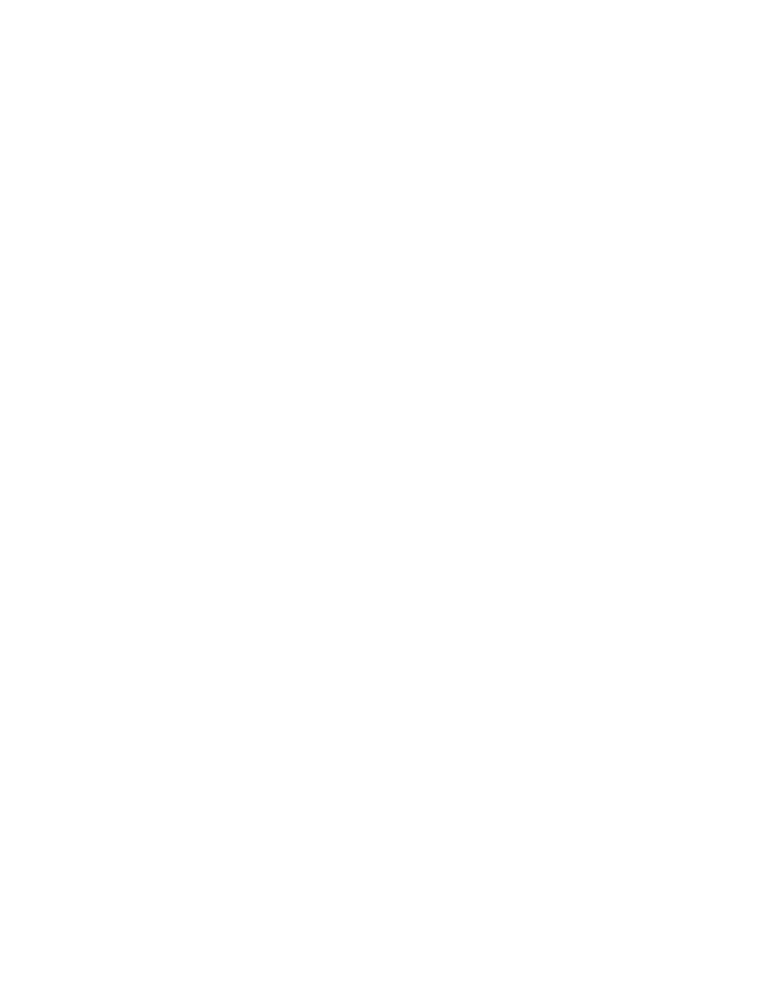


68.

**CHILTON**

**Perhaps you should have been less**

**specific about what kind.**

(**to Barney)**

**Stand him by the toilet. Then leave us.**

**Barney props the hand truck into position, then both orderlies go. Chilton finishes another letter, sighs happily.**

**CHILTON**

(continuing)

**Such a lot of correspondence! I can**

**hardly wait to analyze it in more**

**detail... But first things first.**

**Tossing letters onto the cot, he rises, crosses out into the corridor, and bends to remove a small tape recorder from underneath Clarice's desk. He waggles it triumphantly at Dr. Lecter.**

**CHILTON**

(continuing)

**I thought she might be looking for a**

**civil rights violation in Migg's**

**death, so I bugged you... Not a word**

**to me in all these years, Hannibal.**

**Then Crawford sends his bit of fluff**

**over here, and you just turn to jelly.**

**It's too pathetic.**

**SIDE ANGLE - TWO SHOT**

**as Chilton, back in the cell, leans tauntingly close to the front of Dr. Lecter's mask.**

**CHILTON**

**You still think you're going to walk**

**on some beach, and see the birdies? I**

**don't think so, Hannibal... I called**

**Senator Ruth Martin, and she never**

**heard of any deal with you. She never**

**heard of Clarice Starling, either.**

**They scammed you, Hannibal...**

**CLOSE ON Dr. Lecter's glittering eyes, behind their slits.**

**CHILTON**

(continuing)

**When Crawford gets through milking**

**you, he's giving you to Baltimore**

**Homicide for the Raspail murder.**

(more)


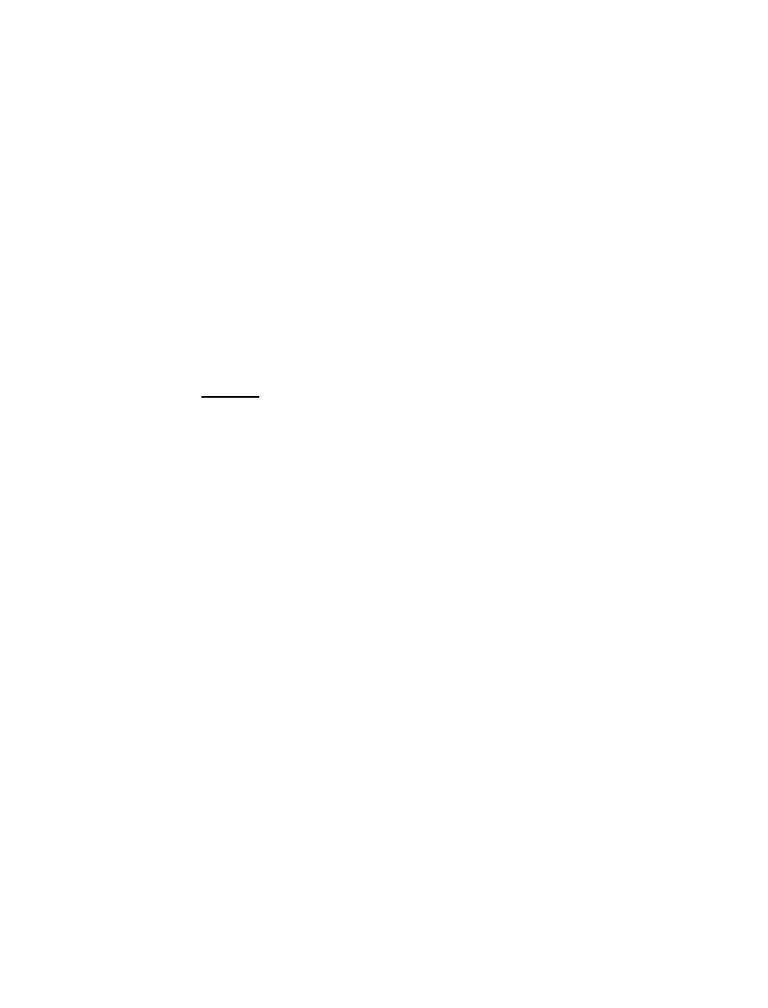


69.

**CHILTON** (cont'd)

**And they're preparing some special**

**surprises for you right now, in my**

**electroshock room.**

**DR. LECTER'S POV (FRAMED BY EYE-SLITS)**

**first looking at Chilton's moving lips... then LOWERING to his soft, white, inviting throat...**

**CHILTON**

**The Starling bitch wants you to rot**

**here, in this little box, till your**

**teeth fall out and you're soiling**

**diapers. You've seen the old ones,**

**Hannibal. They weep when their stewed**

**peaches get cold. That'll be you, too.**

**Unless - you trade with me.**

**FAVORING CHILTON**

**as he sits chummily on the table.**

**CHILTON**

**There never was a deal with Senator**

**Martin - but there is now. I've been**

**on the phone for hours, Hannibal, on**

**your behalf. Here's what you get: if**

**you identify Buffalo Bill, and the**

**girl is found in time, Senator Martin**

**will have you transferred to Brushy**

**Mountain State Prison, in Tennessee...**

**CLOSE AGAIN ONDR. LECTER'S EYES**

**as they shift restlessly, away from Chilton - then suddenly lock onto something. They widen with interest.**

**CHILTON** (O.S.)

**The Governor has already agreed. You**

**get books, a view of the woods, and**

**plenty of exercise time...**

**DR. LECTER'S POV - EXTREME CLOSEUP**

**On the cot, carelessly left there, lying half-hidden under the letters and the rumpled sheet... is Chilton's gold pen.**

**CHILTON** (O.S.)

**And best of all, you'd be out of Jack**

**Crawford's reach, forever. The Senator**

**will verify these terms on the phone,**

**and guarantee them in writing...**


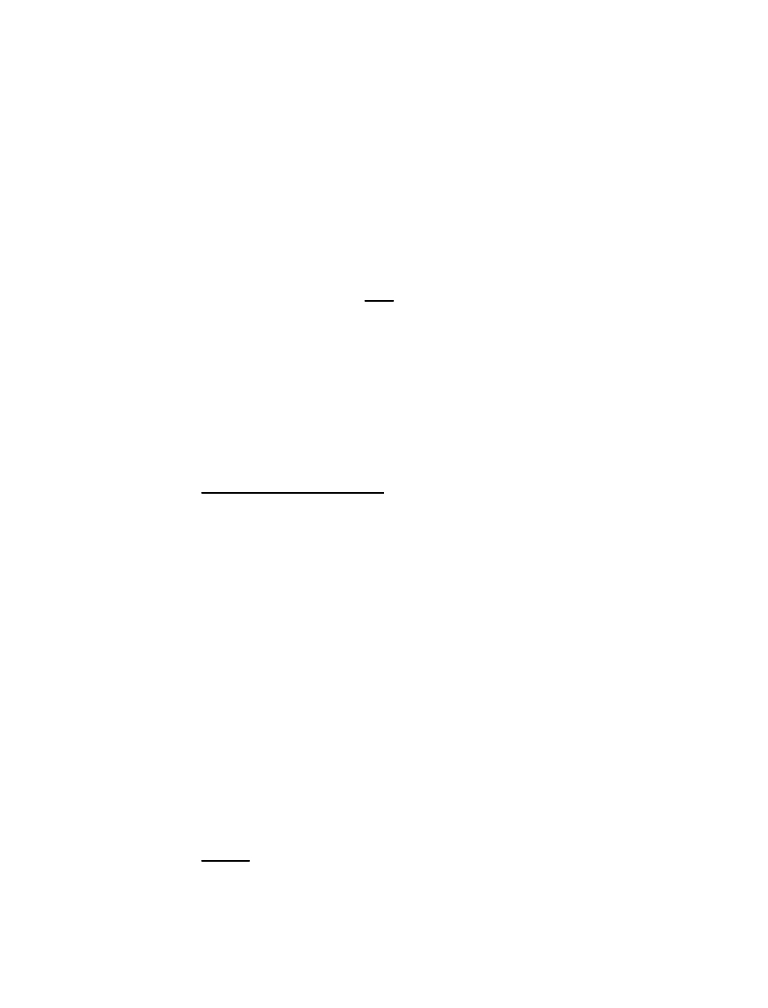


70.

**BACK ON DR. LECTER**

**as he stares a moment longer at the pen, then shifts his eyes towards Chilton. We can almost hear his brain clicking.**

**CHILTON** (O.S.)

**In exchange, I get your full**

**cooperation in publishing a**

**professional account of this - my**

**successful interviews with you. You**

**publish nothing. And I get exclusive**

**access to any material from Catherine**

**Martin... So. Do you accept my demands?**

(**pause)**

**Answer me, Hannibal.**

**A beat. Dr. Lecter is silent. Chilton sticks his face INTO SHOT, almost intimately close to the mask. He is agitated.**

**CHILTON**

**You'll answer me now, or by God,**

**you'll answer to Baltimore Homicide.**

**Who is Buffalo Bill?**

**DR. LECTER**

(**pause; then softly)**

**I'll tell the Senator herself. But**

**only in Tennessee...**

**CUT TO:**

**INT. JOHNS HOPKINS - GENDER IDENTITY CLINIC** - **DAY**

**MOVING ANGLE - as the very impatient Crawford, clutching a folder, strides down a hall beside DR. DANIELSON - early 50's, severe, in a lab coat. Nurses, doctors, glance as they pass.**

**DR. DANIELSON**

**I'm not having a witch hunt here, Mr.**

**Crawford! Our patients are decent, non-**

**violent people with a real problem.**

**CRAWFORD**

**Dr. Danielson, the man we want was**

**never your patient. It would be**

**someone you refused because he tries**

**to conceal a record of criminal**

**violence. Please, Doctor - time is**

**eating us up. Just show me the ones**

**you've turned away.**


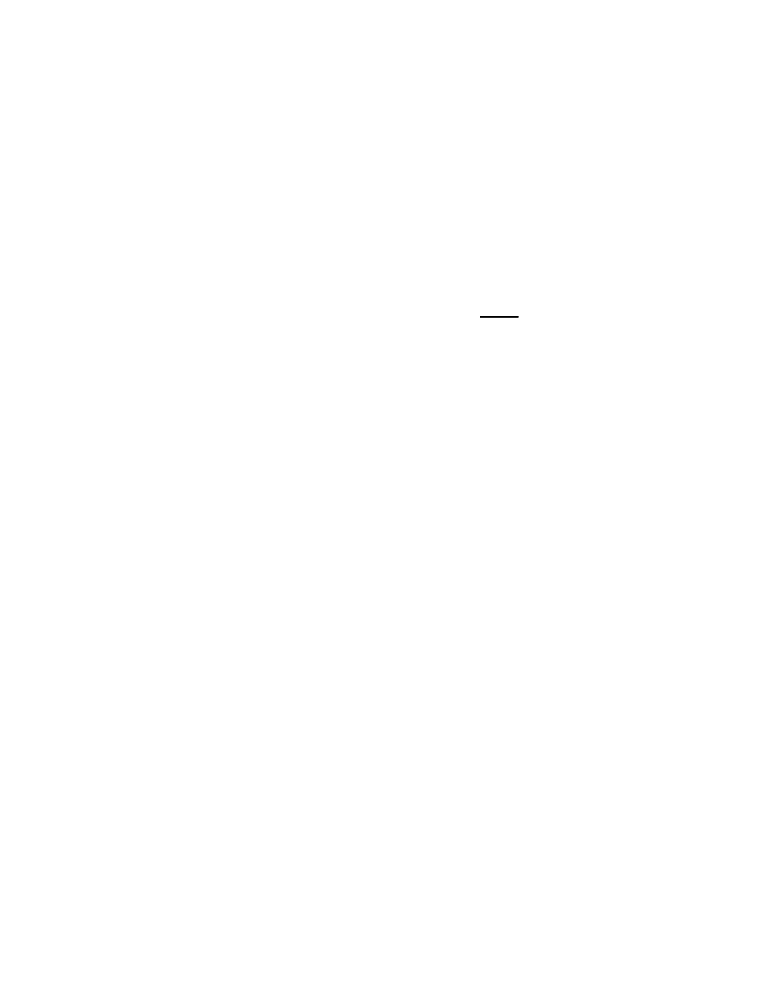


71.

**Danielson enters a cramped, stainless steel nurse's gallery, with Crawford following, and pours himself a cup of coffee.**

**DR. DANIELSON**

(**adamantly)**

**Examination and interview materials**

**are confidential. We've never violated**

**an applicant's trust, and we never**

**will.**

**CRAWFORD**

**You want to see a violation? This is**

**a violation...**

**He takes a black & white photo from his folder, slaps it down in front of Danielson. From our angle, we can't see it clearly.**

**CRAWFORD**

(continuing)

**Her name is Kimberly Jane Emberg, she**

**was just ID'd. I met her on a slab in**

**West Virginia. And sometime tomorrow,**

**or tomorrow night, he's going to do**

**the same thing to Catherine Martin.**

**DR. DANIELSON**

**That's a childish, bullying stunt, Mr.**

**Crawford. I was a battlefield surgeon,**

**so you can put away your picture.**

**Burroughs sticks his head in, looking for Crawford.**

**BURROUGHS**

**Phone, Jack. Director Burke.**

**CRAWFORD**

(**snaps)**

**In a minute!**

**Burroughs hurriedly retreats. Crawford strains for patience.**

**CRAWFORD**

(continuing)

**Look... search your own records, if**

**you prefer. You can do it a lot faster**

**than us, anyway. If we find Buffalo**

**Bill through your information, I'll**

**suppress it. Nobody has to know this**

**hospital cooperated.**


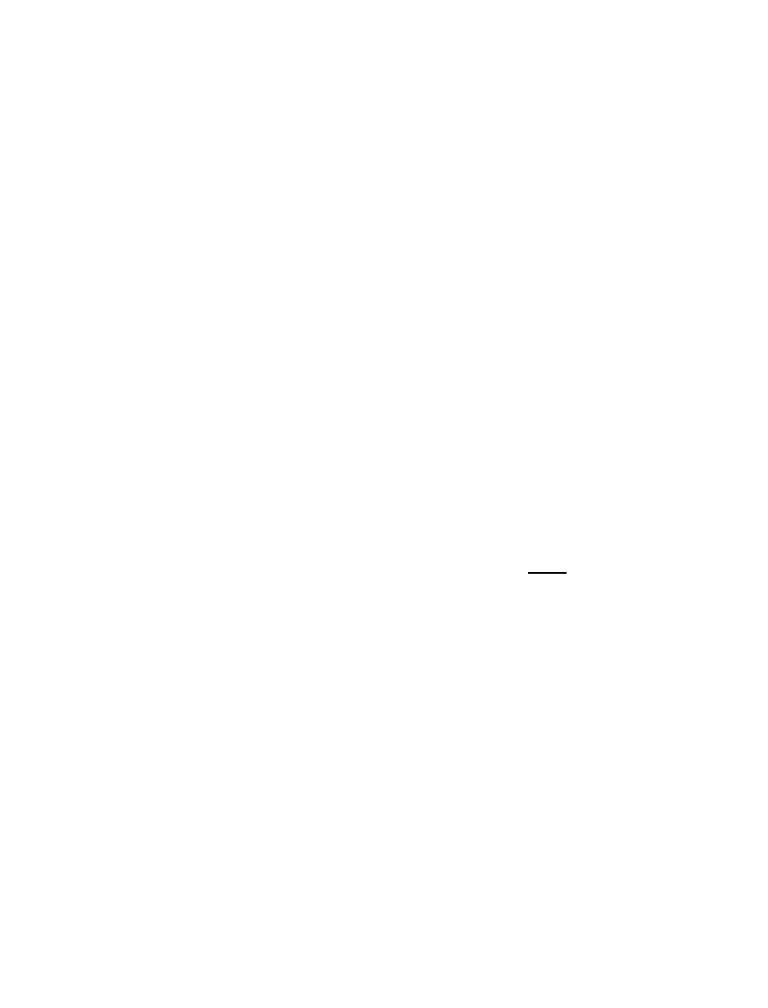


72.

**DR. DANIELSON**

**I doubt very much that the FBI or any other government agency can keep a**

**secret, Mr. Crawford. Truth will**

**out... And then what? Will you give**

**Johns Hopkins a new identity? Put a**

**big pair of sunglasses on this**

**building, and a funny nose?**

**CRAWFORD**

**Oh, that's clever, Dr. Danielson. Very**

**humorous. You like the truth? Try this.**

(**right in his face,**

**enraged)**

**He kidnaps young women and kills them**

**and rips their skins off. We don't**

**want him to do that anymore. If you**

**don't help me, just as fast as you**

**can, then the Justice Department is**

**going to ask publicly for a court**

**order, We'll ask twice a day, just in**

**time for the morning and evening news.**

**And each one of our press conferences**

**will focus on Dr. Danielson, over at**

**Johns Hopkins, and how we're still**

**hoping for his cooperation. And every**

**time there's any news on the**

**case -when Catherine Martin floats,**

**when the next one floats, and the next**

**one - why, we'll just issue another**

**press release about good ol' Dr. Danielson, over at Johns Hopkins - complete with all his humorous fucking remarks.**

**DR. DANIELSON**

(**pause; stiffly)**

**It may be that - I could confer with**

**my colleagues on this. And get back to you.**

**CRAWFORD**

**Would you, Doctor? That would be so**

**kind.**

**CUT TO:**

**INT. THE SURVEILLANCE VAN** - **DAY**

**Crawford is on the scrambler phone. Burroughs watches silently.**


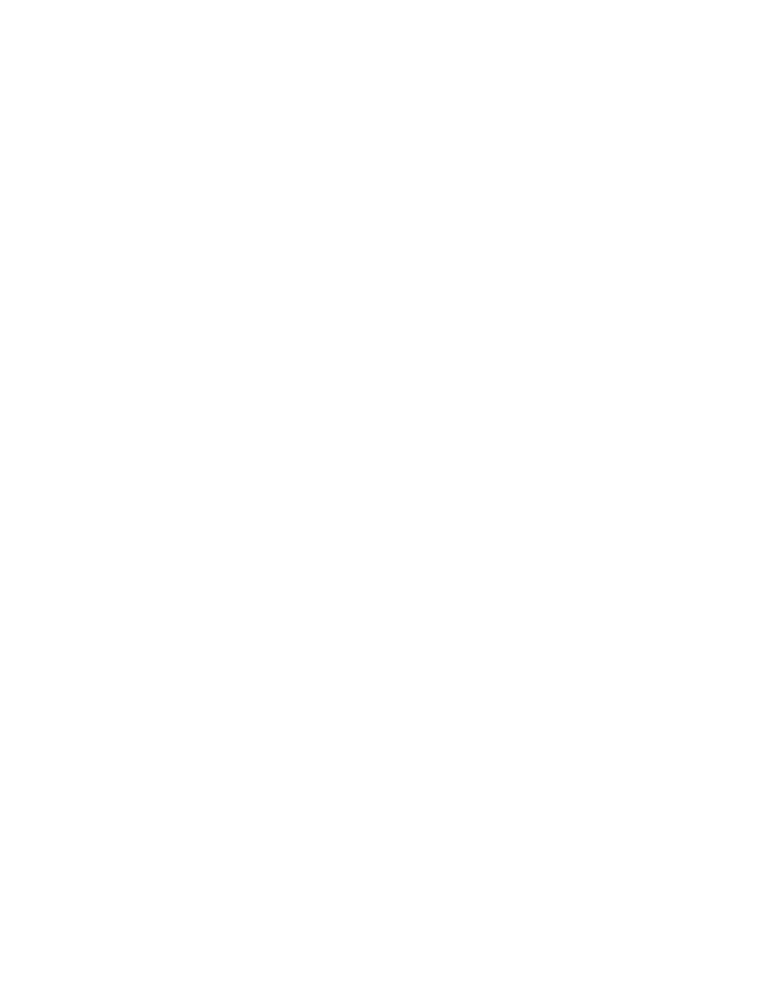


73.

**CRAWFORD**

(**on phone; stunned)**

**Transferred...?**

**CUT TO:**

**INT. FBI BUILDING - OFFICE OF THE DIRECTOR** - **DAY**

**HAYDEN BURKE, the FBI Director, swivels in his big chair. Lean, late 40's, very distinguished. His desk is flanked by flags.**

**DIRECTOR BURKE**

(**on phone)**

**Already airborne for Memphis. Senator**

**Martin's meeting him at the airport.**

(**uneasily)**

**Jack - did you make some soft of**

**promise to Lecter, in the Senator's**

**name?**

**Listening to the answer, he looks uncomfortably across his desk at PAUL KRENDLER, the Deputy Attorney General - 40, very tanned, modish haircut. Krendler is irritable, impatient.**

**DIRECTOR BURKE**

(continuing; **on phone)**

**We're going to have to talk about**

**this, Jack. The Senator's mad as hell.**

**Paul Krendler's over here from**

**Justice, she's asking him to take**

**charge in Memphis... I know that...**

**But you're still in command of the**

**task force, and Lecter's plane can**

**still be ordered back. It's your call,**

**Jack - but I want it now.**

**CUT BACK TO:**

**INT. THE SURVEILLANCE VAN** - **DAY**

**Burroughs starts to make an objection, but Crawford stills him with a hand motion. He is taut, frustrated. Long pause.**

**CRAWFORD**

(**into phone)**

**Let him land.**

**CUT TO:**


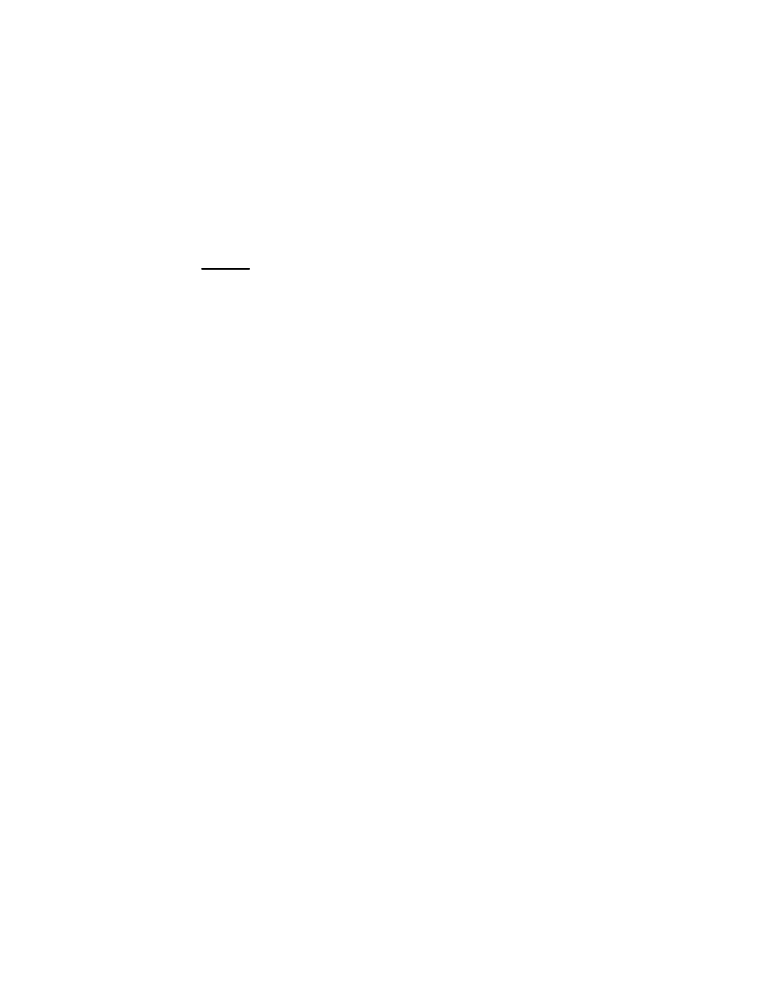


74.

**INT.CLARICE'S DORM ROOM - DOORWAY** - **DAY**

**Clarice opens her door, stares out at Crawford. She's just slipping on her blazer, over her shoulder holster. She's furious.**

**CLARICE**

**Chilton has killed her, hasn't he?**

**That slimy little bastard! We were so**

**close with Lecter - and now her last**

**chance is gone.**

**CRAWFORD**

**Let's get some coffee and talk.**

**CUT TO:**

**EXT. FBI ACADEMY GROUNDS - QUANTICO** - **DAY**

**MOVING ANGLE on Clarice and Crawford, as they walk along a sidewalk, sipping from paper cups. The surveillance van trails them slowly, radios CRACKLING.**

**CLARICE**

**Are you in trouble over this, Mr.**

**Crawford? Can Senator Martin do**

**something to you?**

**CRAWFORD**

**I'm 53, Starling. If I found Jimmy**

**Hoffa on national TV, I'd still have**

**to retire in two years. It's not a consideration. But you are...**

(**beat)**

**You've done enough. If I keep you out**

**of school any longer, you'll be**

**recycled. Cost you six months, at**

**least. I can guarantee you readmission**

**here, but that's about it.**

(**he stops,**

**looks at her)**

**Now's your chance, Starling. Go back to**

**class. Leave Bill to me.**

**CLARICE**

**If you didn't want me chasing him, you shouldn't have taken me to that**

**funeral home.**

**He looks at her steadily, then nods. They walk on.**


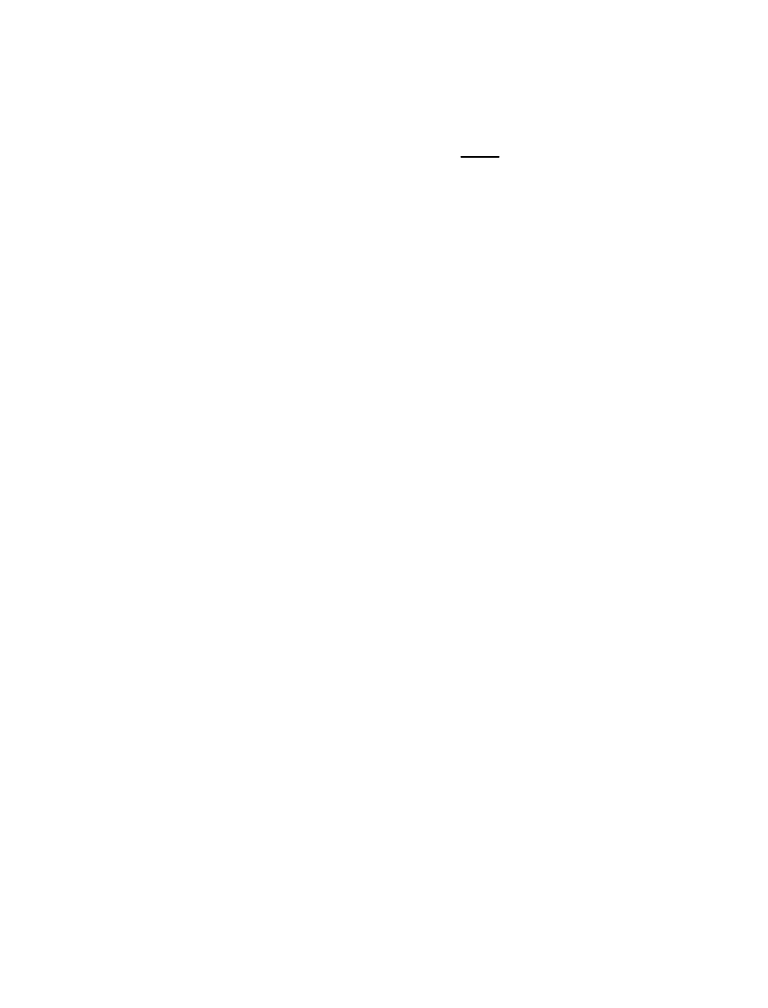


75.

**CLARICE**

(continuing)

**Lecter is still the key, I know he is.**

**Whatever he told me about Bill is just**

**as good now as it was before.**

**CRAWFORD**

**Or just as worthless. But I want you**

**in Memphis, close to him. Maybe when**

**he gets tired of toying with Senator**

**Martin, he'll talk to you again.**

**There's a plane waiting for you now at**

**the airstrip.**

**She smiles at this acknowledgment; he never thought she's quit.**

**CLARICE**

**I lied to Lecter. I'll need some kind**

**of peace offering... Can I get the**

**drawings from his cell?**

**CRAWFORD**

**Good idea. Meantime, try to get a feel**

**for Catherine Martin. Her apartment,**

**her friends... how he might've stalked**

**her. I'm going to the other two**

**clinics, Minnesota and Ohio.**

(**he crumples his cup,**

**tosses it)**

**Now's the hardest part, Starling. Use**

**your anger, don't let it keep you from thinking. Just keep your eyes on**

**Catherine. We've got less than 30**

**hours.**

**CLARICE**

(**hesitates)**

**Mr. Crawford... can those cops down**

**there handle Dr. Lecter?**

**CRAWFORD**

(**grimly)**

**They'll use their best men. But they**

**better by paying attention...**

**CUT TO:**

**INT. AIR NATIONAL GUARD HANGER - MEMPHIS, TENNESSEE - DAY CLOSE ON Dr. Lecter. Behind his mask, the alert, searching**

**eyes.**


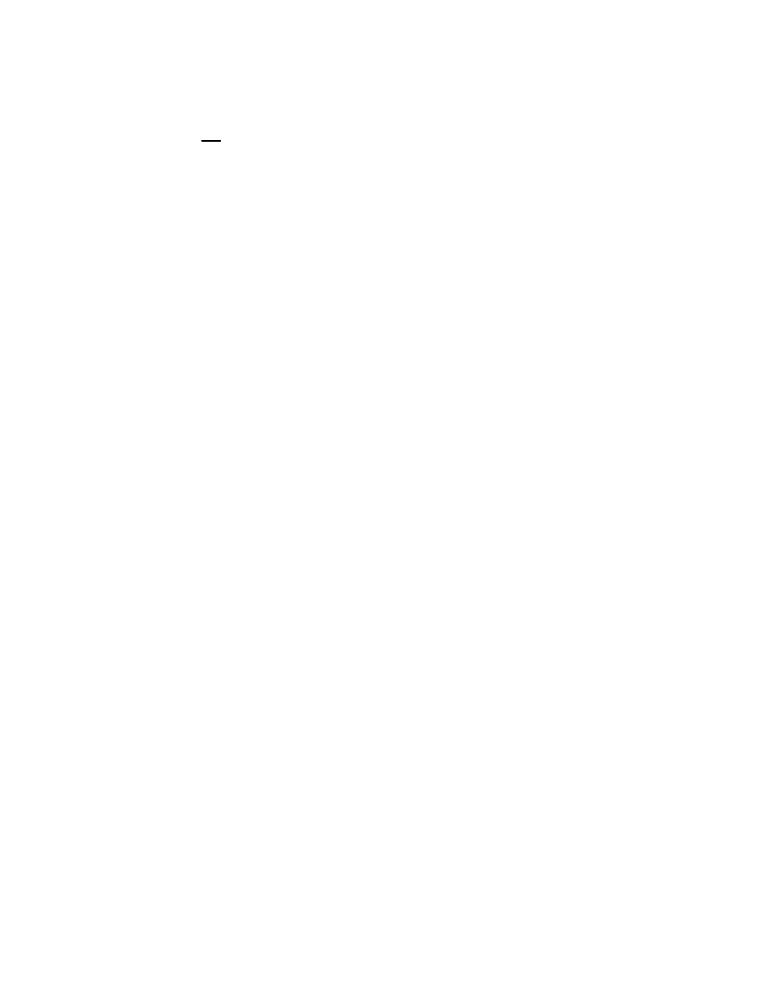


76.

**He will...**

**CRAWFORD** (V.O.)

**OFFICERS PEMBRY AND BOYLE**

**two sturdy, well-armed, veteran prison guards - are checking Dr. Lecter's restraints with clever, careful fingers.**

**BOYLE**

**Welcome to Memphis, Dr. Lecter. I'm**

**Officer Boyle, this is Officer Pembry.**

**We aim to treat you just as nice as**

**you treat us. Act like a gentlemen,**

**you'll get three hots and a cot.**

**PEMBRY**

**But we ain't pussy-footin' with you,**

**buddy ruff. You get cute, try to bite**

**somebody? - we'll tie your asshole in**

**a knot. You savvy?**

**DR. LECTER**

**Oh yes, Officer Pembry. I certainly do.**

**The officers turn away, Boyle signing a clipboarded form.**

**PEMBRY**

(**under his breath)**

**Shit, he's just an ol' broke-dick.**

**Won't be no trouble as all if he don't**

**flip out.**

**BOYLE**

**Dr. Chilton...?**

**NEW ANGLE - WIDER**

**as we see that we're in a vast, dusty hangar. Parked to one side: an EMS ambulance and four highway patrol cruisers; a dozen troopers stand quietly chatting and smoking over there. Prentiss is pacing impatiently, casting anxious glances towards the open hanger doorway.**

**BOYLE**

**If you'll please sign right here, sir,**

**we'll have us a legal transfer.**

**Chilton instinctively pats his shirt pocket for his gold pen; it's gone. He searches other pockets, with growing unhappiness.**

77.

**BOYLE**

(continuing)

**Use mine.**

**PEMBRY**

**Here they come.**

**TWO BLACK STRETCH LIMOSINES**

**glide smoothly into the hangar, stop. Secret Service agents pour out of the lead car, form a cordon. A driver opens the rear door of the second car, and Krendler steps out, followed by the Senator's assistant, with a briefcase, followed, as last, by the Senator herself. Barely glancing around, she strides towards Lecter.**

**NEW ANGLE -DR. LECTER AND SEN. MARTIN**

**as she stops, struck by the bizarre spectacle of his restraints. The others instinctively keep a distance, but Chilton, with theatrical relish, unstraps and removes Dr. Lecter's mask.**

**CHILTON**

**Senator Martin, meet Dr. Hannibal**

**Lecter.**

**They stare at one another for a long moment: the Senator tense, almost haggard, the madman with his unearthly poise.**

**SEN. MARTIN**

**Dr. Lecter, I've brought an affidavit**

**guaranteeing your new rights... You'll**

**want to read it before I sign.**

**He assistant unsnaps his briefcase, reaches for the form.**

**DR. LECTER**

**I won't waste your time and**

**Catherine's time bargaining for petty**

**privileges. Clarice Starling and that**

**awful Jack Crawford have wasted far**

**too much already. I only pray they**

**haven't doomed the poor girl... Let me**

**help you now, and I'll trust you when**

**it's all over.**

**SEN. MARTIN**

**You have my word. Paul?**

**Krendler raises a pad, poised to take notes.**

78.

**DR. LECTER**

**Buffalo Bill's real name is William**

**Rubin. I met him just once. He was**

**referred to me in April or May, 1980,**

**by my patient Benjamin Raspail. They**

**were lovers, but Raspail had become**

**very frightened. Apparently Rubin had**

**murdered a transient, and - done**

**things with the skin. He thought if I**

**could cure Billy, then Billy'd be safe**

**from the police, and he's be safe from**

**Billy... Obviously, he was wrong.**

**KRENDLER**

**We need his address, a physical descr-**

**DR. LECTER**

**Did you nurse Catherine?**

**SEN. MARTIN**

(**pause; startled)**

**What...?**

**DR. LECTER**

**Did you breast-feed her?**

**He flicks his tongue obscenely.**

**KRENDLER**

**You son-of-a -**

**The Senator stills him with a hand. She is trembling.**

**SEN. MARTIN**

**Yes... I did.**

**DR. LECTER**

**Toughened your nipples, didn't it...?**

(**a beat; then**

**rapidly, bored)**

**Six foot one, strongly built, about**

**190 pounds. Hair brown, eyes pale**

**blue. He'd be about 35 now. He said he**

**lived in Philadelphia, but may have**

**lied. That's really all I can**

**remember, Senator - but if I think of**

**any more, I'll let you know.**

**SEN. MARTIN**

(**to the others)**

**Let's go with it.**

**They start towards the car, but he calls out, stopping her.**


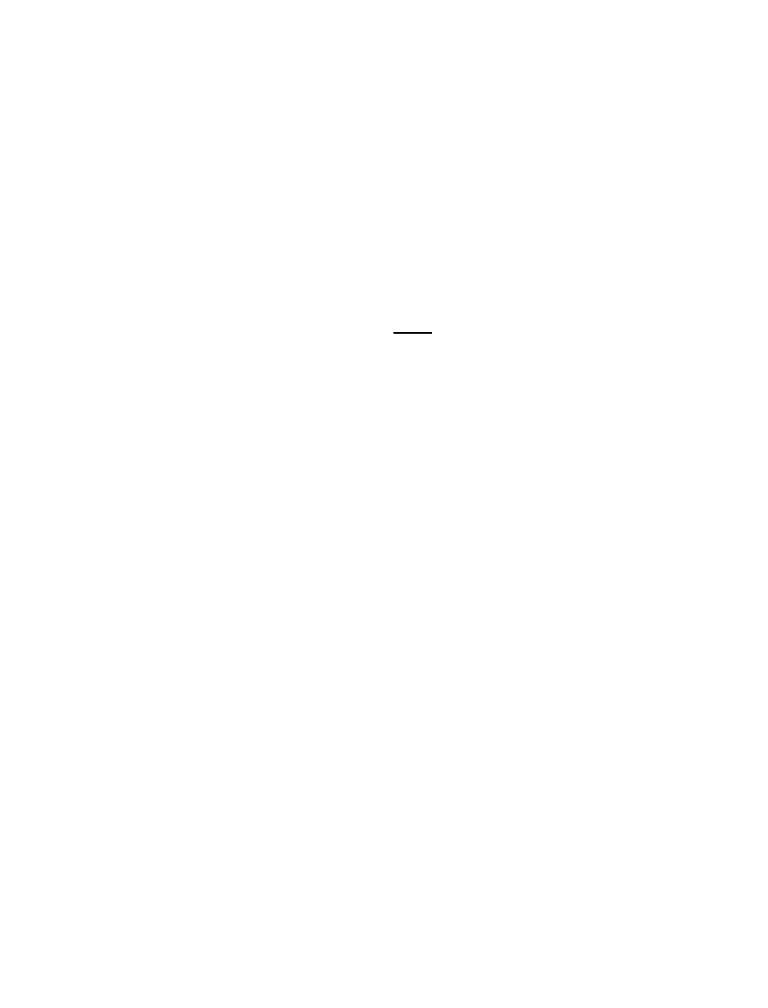


79.

**DR. LECTER**

**Senator Martin...! You can't trust**

**Jack Crawford or Clarice Starling.**

**It's such a game with these people.**

**They're determined to get the arrest**

**for themselves. The "collar," I think**

**they say.**

**SEN. MARTIN**

**Thank you, Doctor. I'll keep it in**

**mind.**

**DR. LECTER**

**Oh, and Senator...? Love you suit.**

**DISSOLVE TO:**

**INT. MR. GUMB'S BASEMENT - DAY (DIMLY LIT)**

**CLOSE ON scraps of food - peas, chicken bones - lying on the cement floor of the pit, near the foil tray of a TV dinner.**

**CATHERINE** (O.S.)

(**muttering, feisty)**

**Close enough to fuck is close enough**

**to fight...**

**CATHERINE**

**is hunched over in concentration. The plastic toilet bucket is on her lap, and she has yanked down its cotton string.**

**CATHERINE**

**Get my legs round your neck, you**

**goddamn creep, I'll send you home to**

**Jesus...**

**HER FINGERS**

**are tying a chicken bone to the bucket's handle, where it meets the string. The other end of the string is tied to her wrist.**

**SHE STANDS**

**gathers the coiled string in one hand, and swings the bucket by its handle, calculating this distance up to the basement floor.**

**CATHERINE**

**Okay, Precious. Time for a treat...**

80.

**She hurls the bucket upwards.**

**AT THE LIP OF THE OUBLIETTE**

**the bucket sails out, bounces LOUDLY, then falls back inside.**

**ANGLE ON THE DOG, PRECIOUS**

**who is elsewhere in the basement, worrying a toy. She cocks an ear, making a low GROWL, then sets off to investigate.**

**DOWN IN THE PIT**

**Catherine swings the bucket again, trying another cast. THE BUCKET LANDS**

**two feet beyond the pit's edge, rolls a bit, stops. PRECIOUS TROTS UP**

**then pauses, staring curiously towards...**

**VERY LOW ANGLE (DOG'S POV)**

**the enticing chicken bone, six feet away. It twitches as Catherine tugs on the string, edging the bucket back towards the pit.**

**Precious with her tail wagging, BARKS - greedy but suspicious.**

**CATHERINE**

**staring upwards, pulls again, even so gently, at the string.**

**CATHERINE**

(**softly)**

**Preeeeecious...! C'mon, boy, nice**

**yummy bone... c'mon, you little shit...**

**PRECIOUS**

**edges reluctantly closer... then suddenly rushes in, seizing the bone in her teeth. She tries to run away with it, but Catherine is pulling her towards the hole, working her like a hooked fish. Her toenails scrabble as she tries to stop.**

81.

**CATHERINE**

**stares desperately, unable to see how she's doing.**

**CATHERINE**

**Hang on, boy... hang on...**

**PRECIOUS**

**still fights for the bone, GROWLING, as the bucket rocks precariously on the edge of the pit. A long, seesaw battle... until finally, when one of her forelegs slips momentarily into the hole, she panics and lets go. The bucket flops over the edge.**

**CATHERINE**

**crouches, covering her head as the bucket bounces off her.**

**Nooooo...!**

**CATHERINE**

**THE LITTLE DOG**

**furious, BARKS down at her, then trots away in disgust. CLOSE ON CATHERINE**

**as she sinks to the cold cement. She slaps aside the foil tray, the scraps of food, sobbing in utter despair.**..

**DISSOLVE TO:**

**INT. CATHERINE MARTIN'S APARTMENT - LIVING ROOM** - **DAY CLOSE ON a framed photo of Sen. Martin and Catherine, held**

**in Clarice's cotton-gloved hands. Powdered fingerprints on the glass.**

**Clarice glances up from the photo, smiles disarmingly at - A young STATE TROOPER sitting in Catherine's easy chair.**

**He smiles back at her, then relaxes, returns to his newspaper. He also wears gloves.**

**CUT TO:**

**INT. KITCHEN**

**Clarice closes the refrigerator door, glances around.**

82.

**A big REEL-TO-REEL TAPE RECORDER has been set up on the breakfast counter, attached to Catherine's phone. Two new red phones are hooked up as well.**

**CUT TO:**

**INT. BATHROOM**

**Clarice slides open the medicine cabinet's mirror, looks inside. She reaches in, pokes carefully amongst the lotions.**

**CUT TO:**

**INT. ATTIC CRAWL-SPACE**

**A ceiling hatch bangs open, sending up dust clouds. Clarice, lit from underneath, pokes her head through, looking around.**

**CUT TO:**

**INT. BEDROOM**

**Flat on her back, Clarice wriggles out from under Catherine's bed. She sits up, brushing dust from her face and hair.**

**CUT TO:**

**INT. BEDROOM**

**CLOSE ON an open, multi-tiered jewelry box, resting atop a bureau, as Clarice's fingers pick through costume jewelry.**

**Clarice closes the box, and is just turning away when a figure suddenly looms INTO SHOT, giving her a bad start; she cries out softly.**

**Senator Martin is revealed, staring at her suspiciously.**

**SEN. MARTIN**

**Who are you, please? I thought the**

**police were through in here.**

**CLARICE**

**I'm Clarice Starling, Senator. FBI.**

83.

**SEN. MARTIN**

(**softly, very angry)**

**Clarice Starling...**

(**calls out)**

**Paul? Would you come in here,**

**please...?**

**Krendler enters from the hallway, looks at Clarice.**

**SEN. MARTIN**

(continuing)

**Miss Starling, you may know the Deputy**

**Attorney General, Mr. Krendler. Paul,**

**this is the trainee that Jack Crawford**

**sent to Lecter... She lied to him,**

**pretending to have my authority, and**

**thus jeopardized this entire**

**investigation. Now she has the further**

**gall to invade my daughter's privacy,**

**again without permission. If her**

**little games have killed my baby...**

**Overcome, she hurries from the room. Krendler shuts the door behind her, points sternly at Clarice.**

**KRENDLER**

**You're out of line, Starling, and**

**you're off this case. Back to Quantico.**

**CLARICE**

**Sir, Mr. Crawford instructed me -**

**KRENDLER**

**Your instructions are what I'm giving**

**you now. Jack Crawford answers to the**

**Director, and the Director answers to**

**me. My God, Crawford's losing it...!**

**He shouldn't even be on this, with his**

**wife sick as she is... How the hell**

**did you get in here, anyway? He gave**

**you -what? Some kind of special ID?**

**Let's have it.**

**CLARICE**

(**stubbornly)**

**I need the ID to fly with my gun. The**

**gun belongs in Quantico.**

**KRENDLER**

**Gun. Jesus. Turn in the ID as soon as**

**you get back. The gun, too. Be on the**

**next plane, Starling, there's one in**

**90 minutes.**

84.

**Clarice, burning, starts for the door, then turns back.**

**CLARICE**

**Mr. Krendler... Dr. Lecter trusts me.**

**Or at least, he used to. If I could**

**just -**

**KRENDLER**

**Lecter has already named Buffalo Bill.**

**Clarice reacts, surprised. Krendler takes a folded computer sheet from his pocket, shoves it at her. She takes it, reads.**

**KRENDLER**

(continuing)

**He gave us a perfectly good**

**description, and we're on it now, so**

**we won't be needing your little**

**novelty act any longer - or his,**

**either. He's under close guard at the**

**courthouse, pending a prison transfer.**

**The next plane, Officer.**

**CLARICE**

**Sir, doesn't this "William Rubin"**

**strike you as - I don't know - kind of**

**vague?**

**Krendler moves in very close to her, pale with anger.**

**KRENDLER**

**Do you need a police escort, Starling?**

**Or do you think you can find the**

**airport by yourself?**

**CLARICE**

**Yes sir. I can find it by myself.**

**CUT TO:**

**EXT. SHELBY COUNTY COURTHOUSE** - **DAY**

**The old courthouse is a massive Gothic stronghold, with an armada of police cruisers parked at the curb.**

1. **larice climbs from her rented car, SLAMMING the door angrily. Holding a rolled-up pile of papers - Dr. Lecter's drawings - she starts determinedly up the steps. A nearby commotion makes her pause.**
2. **r. Frederick Chilton in a sea of interviewers and mini- cams, is preening grandly.**


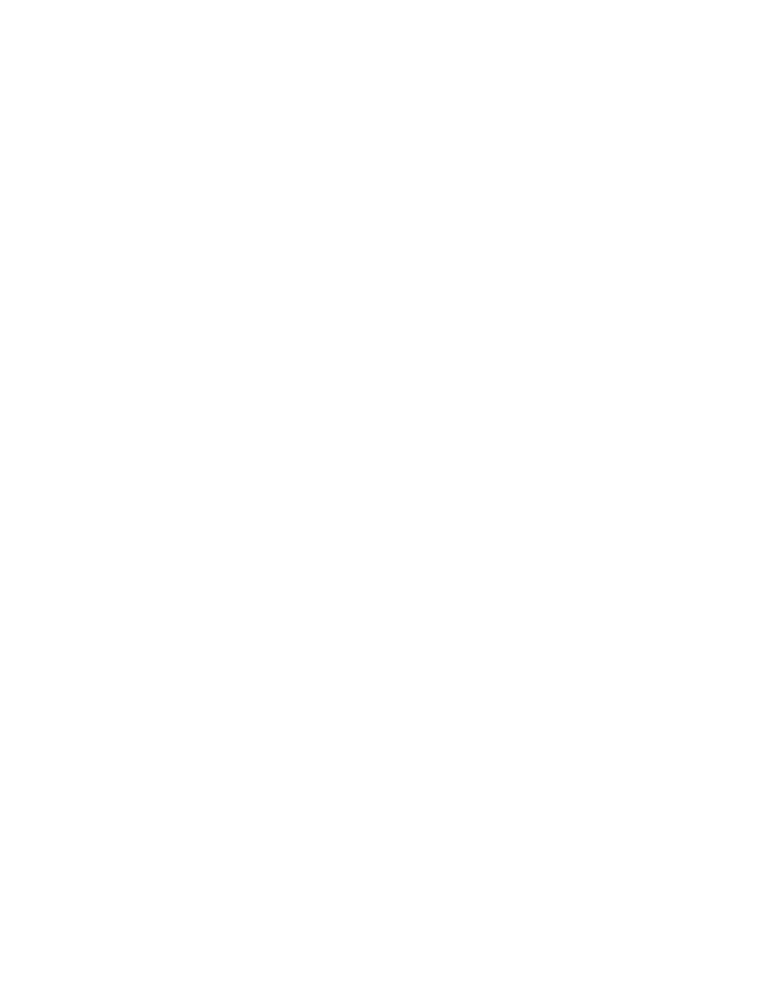


85.

**Clarice carefully avoiding his gaze, slips up the steps and inside.**

**CUT TO:**

**INT. COURTHOUSE - GROUND FLOOR** - **DAY**

**SGT. TATE, a Memphis policeman, is studying Clarice's ID. He looks up at her from his command desk, a bit doubtfully.**

**SGT. TATE**

**Are you with Mr. Krendler's people?**

**CLARICE**

**I just left him.**

**SGT. TATE**

**Access to Lecter is strictly limited.**

**We've been getting death threats.**

(**hesitates again)**

**Log in, and check your weapon.**

**He picks up a phone, murmurs into it. As he does so,**

**Clarice glances around this main ground floor lobby.**

**HER POV**

**The building looks like an armed fort. Cops with shotguns guard the front door, both ends of the hall, the foot of the stairs, the single elevator. More of them are coming and going.**

**MURRAY** (V.O.)

**Shoot, we haven't had this kinda**

**security since the President came**

**through town...**

**CUT TO:**

**INT. ELEVATOR** - **MOVING**

**Clarice and OFFICER MURRAY, a young patrolman, ride up in an old-fashioned, CREAKING, metal-cage elevator. He is excited.**

**MURRAY**

**Every cop in Tennessee wants a look at**

**this guy. 'Sit true what they're**

**sayin' - he's some kinda vampire?**

86.

**CLARICE**

(**beat)**

**I don't have a name for what he is.**

**CUT TO:**

**INT. HISTORICAL SOCIETY ROOM - 5TH FLOOR**

**Pembry, at a desk by the door, looks up from examining the unrolled pile of Dr. Lecter's drawings.**

**PEMBRY**

**You know the rules, ma'am?**

**CLARICE**

**Yes, Officer Pembry. I've questioned**

**him before.**

**He waves her on her way, but retains the drawings for now. MOVING ANGLE - WITH CLARICE**

**as she crosses the big, spare, white octagonal room. A massive, temporary iron cage has been installed; Officer Boyle sits facing its barred door. He rises, nods, moving away to allow her privacy.**

**INSIDE THE CAGE**

**a cot and a small table, each bolted to the floor, and a limsy paper screen, hiding a toilet. Dr. Lecter sits at the table, his back to her, studying the Buffalo Bill case file. He now wears a green prison jumpsuit. A small cassette player is chained to the steel table.**

**DR. LECTER**

(**without turning)**

**Good afternoon, Clarice.**

**She stops at a striped police barricade, before his bars.**

**CLARICE**

**I thought you might want your drawings**

**back... Just until you get your view.**

**DR. LECTER**

**How very thoughtful... Or did Crawford**

**send you here for one last wheedle -**

**before you're both booted off the case?**

**CLARICE**

**Nobody sent me. I came on my own.**


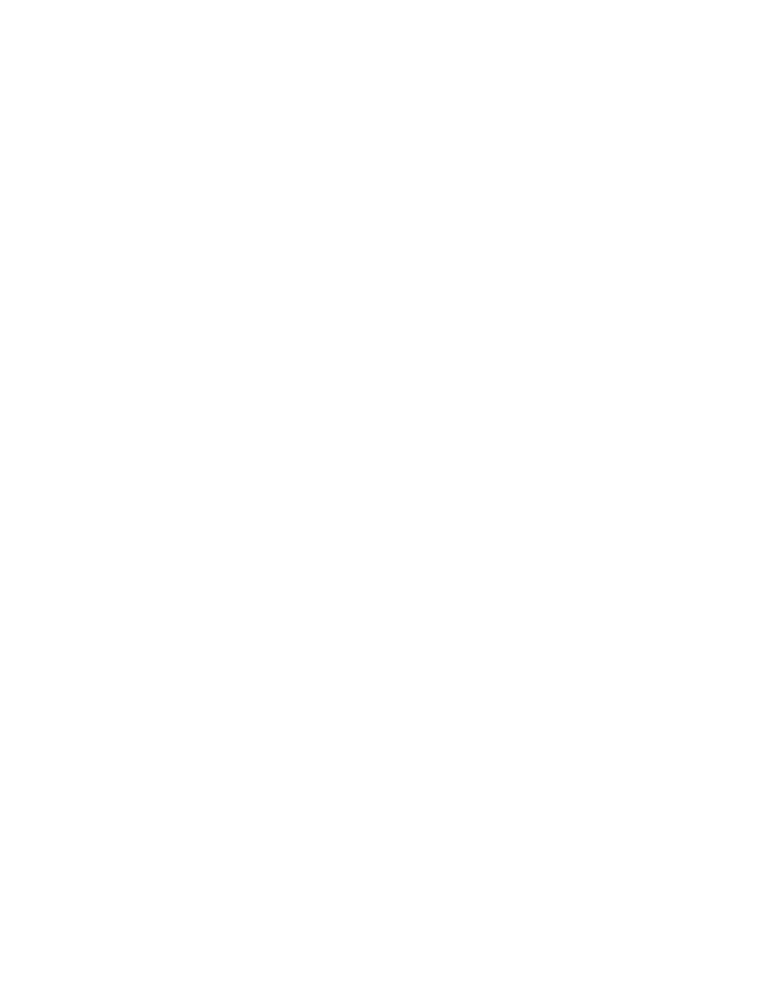


87.

**He spins in his swivel chair, stops neatly. A coy smile.**

**DR. LECTER**

**People will say we're in love.**

(**beat)**

**Pity you tried to fool me, isn't it?**

**Pity for poor Catherine. Tick-tock...**

**He spins again in his chair, playfully.**

**MOVING ANGLE - FAVORING CLARICE**

**as she circles the cage, trying to keep his face in sight.**

**CLARICE**

**Dr. Lecter, you find out everything.**

**You couldn't have talked with this**

**"William Rubin", even once, and come**

**out knowing so little about him... You**

**made him up, didn't you?**

**DR. LECTER**

**Clarice... you're hardly in a position**

**to accuse me of lying.**

**CLARICE**

**I think you were telling me the truth**

**in Baltimore - or starting to. Tell me**

**the rest now.**

**DR. LECTER**

**I've studied the case file, have**

**you...? Everything you need to find**

**him is right in these pages. Whatever**

**his name is.**

**CLARICE**

**Then tell me how.**

**DR. LECTER**

**First principles, Clarice. Simplicity.**

**Read Marcus Aurelius. Of each**

**particular thing, ask: What is it, in**

**itself, what is its nature...? What**

**does he do, this man you seek?**

**CLARICE**

**He kills w-**

**DR. LECTER**

(**sharply, as he stops)**

**No! That's incidental.**


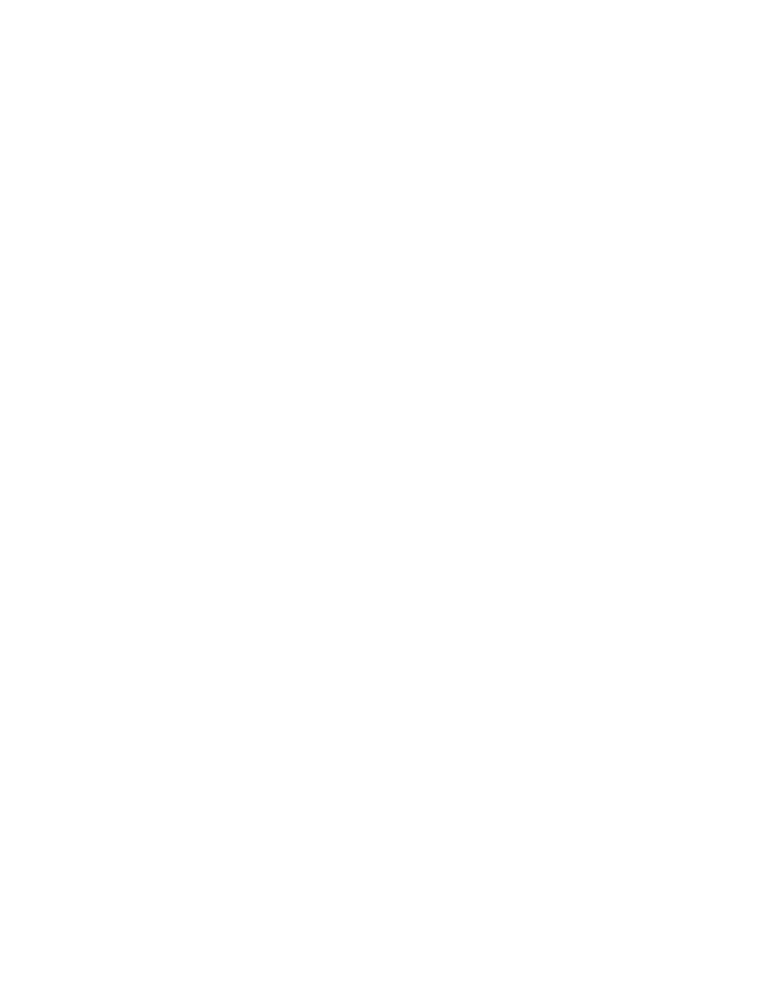


88.

**CLOSE ANGLE - TWO SHOT**

**as he rises, pained by her ignorance, and crosses to the bars.**

**DR. LECTER**

**What is the first and principal thing**

**he does, what need does he serve by**

**killing?**

**CLARICE**

**Anger, social resentment, sexual frus-**

**DR. LECTER**

**No, he covets. That's his nature. And**

**how do we begin to covet, Clarice? Do**

**we seek out things to covet? Make an**

**effort to answer.**

**CLARICE**

**No. We just -**

**DR. LECTER**

**No. Precisely. We begin by coveting**

**what we see every day. Don't you feel**

**eyes moving over your body, Clarice?**

**I hardly see how you couldn't. And**

**don't your eyes move over the things**

**you want?**

**CLARICE**

**All right, then tell me how -**

**DR. LECTER**

**No. It's your turn to tell me,**

**Clarice. You don't have any more**

**vacations to sell, on Anthrax Island.**

**Why did you run away from that ranch?**

**CLARICE**

**Dr. Lecter, when there's time I'll -**

**DR. LECTER**

**We don't reckon time the same way,**

**Clarice. This is all the time you'll**

**ever have.**

**CLARICE**

**Later, listen, I'll -**


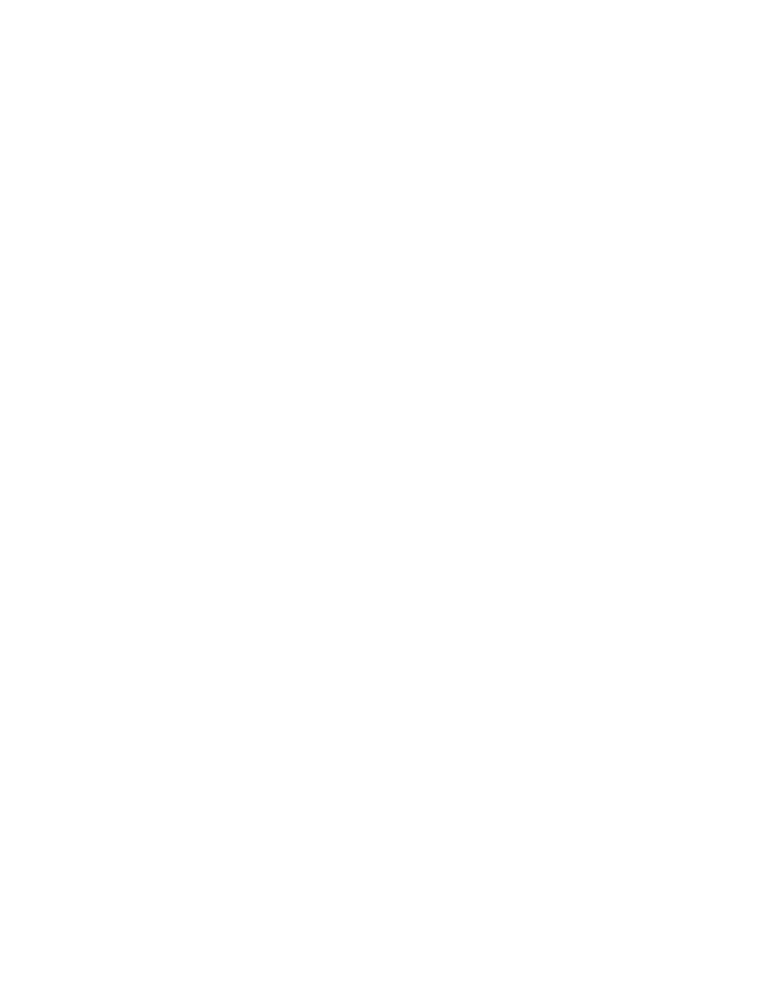


89.

**DR. LECTER**

**I'll listen now. After your father's**

**murder, you were orphaned. You were**

**ten years old. You went to live with**

**cousins, on a sheep and horse ranch in**

**Montana. And - ?**

**CLARICE**

**And - one morning I just - ran away...**

**She turns from him. He presses closer, gripping the bars.**

**DR. LECTER**

**Not "just," Clarice. What set you off?**

**You started what time?**

**CLARICE**

**Early. Still dark.**

**DR. LECTER**

**Then something woke you. What? Did you dream...? What was it?**

**IN FLASHBACK**

**The 10-year old Clarice sits up abruptly in her bed, frightened. She is in a Montana ranch house; it almost dawn. Strange, fearful shadows on her ceiling and walls... a window, partly fogged by the cold; eerie brightness outside.**

**CLARICE** (V.O.)

**I heard a strange sound...**

**DR. LECTER** (V.O.)

**What was it?**

**THE CHILD RISES**

**crosses to the window in her nightgown, rubs the glass.**

**CLARICE** (V.O.)

**I didn't know. I went to look...**

**HIGH ANGLES (2ND STORY) - THE CHILD'S POV**

**Shadowy men, ranch hands, are moving in and out of a nearby barn, carrying mysterious bundles. The mens' breath is steaming... A refrigerated truck idles nearby, its engine adding more steam. A strange, almost surrealistic scene...**


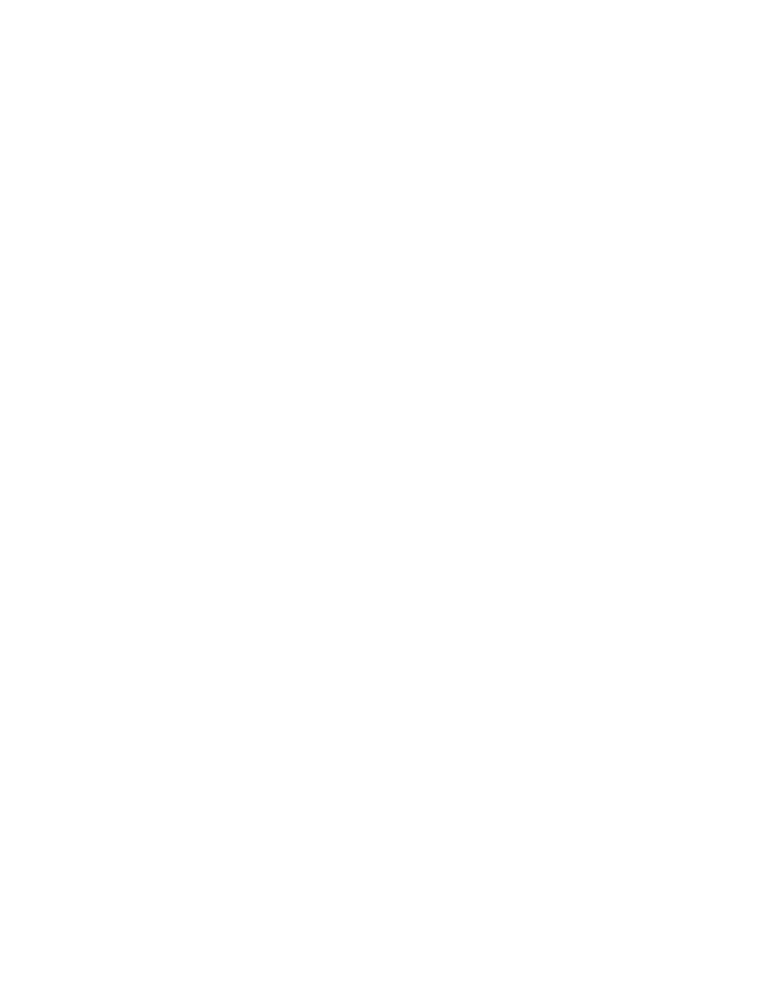


90.

**CLARICE** (V.O.)

**Screaming! Some kind of - screaming.**

**Like a child's voice...**

**THE LITTLE GIRL**

**is terrified; she covers her ears.**

**DR. LECTER** (V.O.)

**What did you do?**

**CLARICE** (V.O.)

**Got dressed without turning on the**

**light. I went downstairs... outside...**

**THE LITTLE GIRL**

**in her winter coat, slips noiselessly towards the open barn door. She ducks into the shadows to avoid a ranch hand, who passes her with a squirming bundle of some kind. He goes into the barn, and she edges after him reluctantly.**

**CLARICE** (V.O.)

**I crept up to the barn... I was so**

**scared to look inside - but I had to...**

**THE LITTLE GIRL'S POV**

**as the open doorway LOOMS CLOSER... Bright lights inside, straw bales, the edges of stalls, then moving figures...**

**DR. LECTER** (**V.O.)**

**And what did you see, Clarice?**

**A SQUIRMING LAMB**

**is held down on a table by two ranch hands.**

**CLARICE** (**V.O.)**

**Lambs. The lambs were screaming...**

**A third cowboy stretches out the lamb's neck, raises a bloody knife. Just as he's about to slice its throat -**

**BACK TO THE ADULT CLARICE**

**staring into the distance, shaken, still trembling from the child's shock. We see Dr. Lecter, over her shoulder, studying her intently.**

**DR. LECTER**

**They were slaughtering the spring**

**lambs?**


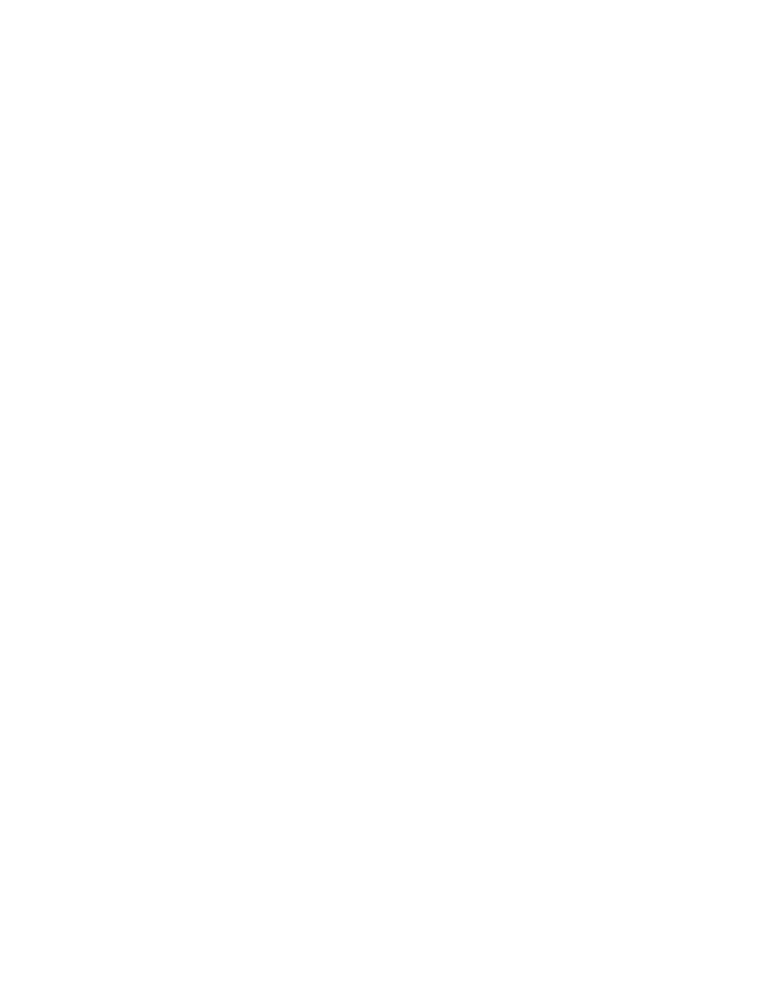


91.

**CLARICE**

**Yes...! They were screaming.**

**DR. LECTER**

**So you ran away...**

**CLARICE**

**No. First I tried to free them... I**

**opened the gate of their pen - but**

**they wouldn't run. They just stood**

**there, confused. They wouldn't run...**

**DR. LECTER**

**But you could. You did.**

**CLARICE**

**I took one lamb. And I ran away, as**

**fast as I could...**

**IN FLASHBACK**

**a vast Montana plain, and crossing this, a tiny figure - the little Clarice, holding a lamb in her arms.**

**DR. LECTER** (V.O.)

**Where were you going?**

**CLARICE** (**V.O.)**

**I don't know. I had no food or water.**

**It was very cold. I thought - if I can**

**even save just one... but he got so**

**heavy. So heavy...**

**The tiny figure stops, and after a few moments sinks to the ground, hunched over in dispair.**

**CLARICE** (**V.O.)**

(continuing)

**I didn't get more than a few miles**

**before the sheriff's car found me. The**

**rancher was so angry he sent me to**

**live at the Lutheran orphanage in**

**Bozeman. I never saw the ranch again...**

**DR. LECTER** (**V.O.)**

**But what became of your lamb?**

(**no response)**

**Clarice...?**


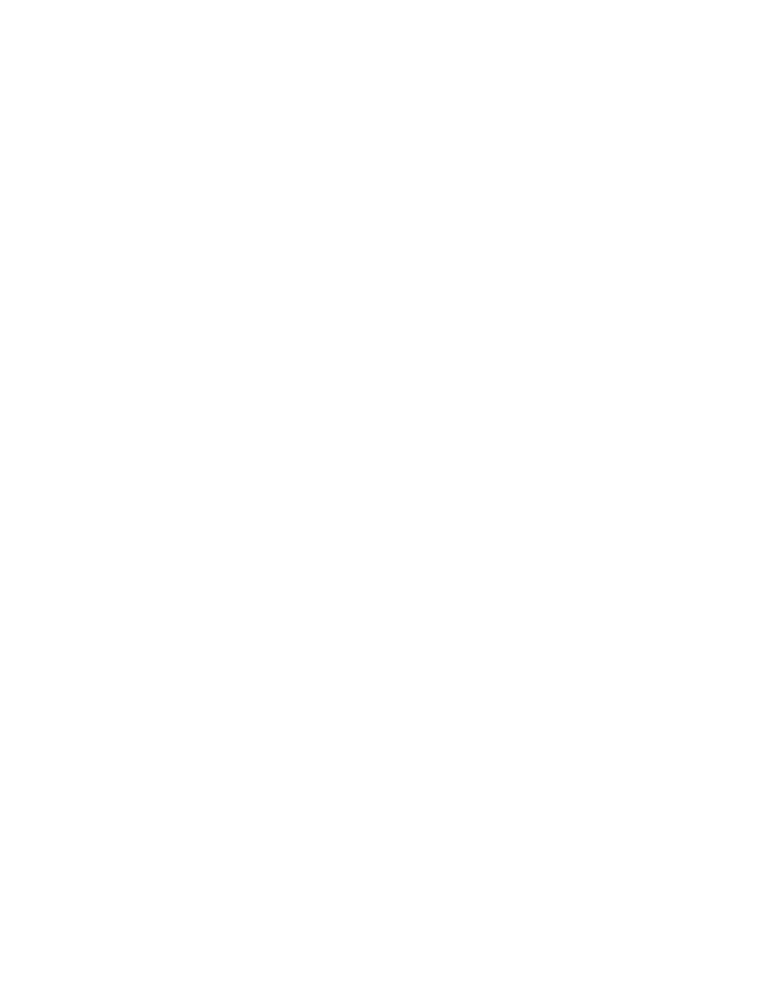


92.

**BACK TO SCENE**

**as the adult Clarice turns, staring into his feverish eyes. She shakes her head, unwilling - or unable - to say more.**

**DR. LECTER**

**You still wake up sometimes, don't**

**you? Wake up in the dark, with the**

**lambs screaming?**

**Yes...**

**CLARICE**

**DR. LECTER**

**Do you think if you saved Catherine,**

**you could make them stop...? Do you**

**think, if Catherine lives, you won't**

**wake up in the dark, ever again, to**

**the screaming of the lambs? Do you...?**

**CLARICE**

**Yes! I don't know...! I don't know.**

**DR. LECTER**

(**a pause; then, oddly**

**at peace)**

**Thank you, Clarice.**

**CLARICE**

(**a whisper)**

**Tell me his name, Dr. Lecter.**

**DR. LECTER**

**Dr. Chilton... I believe you know each**

**other?**

**NEW ANGLE**

**as Clarice turns, startled, and the fuming Chilton seizes her elbow. Pembry and Boyle are beside him, looking grim.**

**CHILTON**

**Out. Let's go.**

**PEMBRY**

**Sorry, ma'a m - we've got orders**

**tohave you put on a place.**

**Clarice struggles, pulling free of them for a moment.**

93.

**DR. LECTER**

**Brave Clarice. Will you let me know if**

**ever the lambs stop screaming?**

**CLARICE**

(**moving closer to the**

**bars)**

**Yes. I'll tell you.**

**DR. LECTER**

**Promise...?**

(**she nods. He smiles)**

**Then why not take your case file? I**

**won't be needing it anymore.**

**He holds out the file, arm extended between the bars. She hesitates, then reaches to take it.**

**VERY CLOSE ANGLE - SLOW MOTION**

**as the exchange is made, his index finger touches her hand, and lingers there, just for a moment.**

**DR. LECTER'S EYES**

**widen, crackling at this touch, like sparks in a cave.**

**DR. LECTER**

**Good-bye, Clarice.**

**CLARICE**

**hugging the case file to her chest, stares back at him as the men crowd in on her, pushing her away.**

**HER POV - MOVING**

**as Dr. Lecter, head cocked in a smile, slowly recedes...**

**DISSOLVE TO:**

**INT. GARMENT SWEATSHOP** - **DAY**

**MOVING ANGLE - MR. GUMB'S POV as he pushes a rolling rack of completed leather garments, each wrapped in plastic, down as aisle. SOUND of many sewing machines, all clattering at once, as he passes row on row of work tables. The seamstresses, mostly black or Hispanic, glance up as he passes, then quickly avert their eyes, his presence disturbing them in some nameless way.**

94.

**A thin FOREMAN in a flowery shirt, sees him approaching. He rises from his desk and comes over cheerfully, as the rack rolls to a stop.**

**FOREMAN**

**Hello, dear! Punctual as always. And**

**what have you brought us today?**

**He seizes one of the dangling jackets, pulling up the plastic wrapper. He examines it, stroking the sleeve.**

**FOREMAN**

(continuing)

**Oh, marvelous... You know, I always**

**say you're the Leonardo of leather.**

**Oil.**

**MR. GUMB** (**O.S.)**

(**a harsh whisper)**

**Pardon...?**

**FOREMAN**

**MR. GUMB** (**O.S.)**

**You're leaving oil on the skin.**

**The foreman quickly releases the jacket.**

**FOREMAN**

**Of course... You'll be wanting your -**

**Mr. Gumb's hand reaches INTO SHOT, snatching an envelope from him. The foreman is watching him walk away, as a seamstress comes over to take the rack of garments. The foreman is vaguely troubled, but shakes it off. He strokes the jacket again, admiringly.**

**FOREMAN**

(continuing; **to**

**seamstress)**

**I wish we had a dozen like him...**

**SOUND UPCUT - Glenn Gould playing Bach's Goldberg Variations...**

**CUT TO:**

**INT. MEMPHIS INTERNATIONAL AIRPORT - LOUNGE AREA** - **DUSK Clarice, in a line of other passengers, is moving slowly**

**towards a departure ramp. Through a huge plate glass window, we can see her plane. She glances back over her shoulder at**


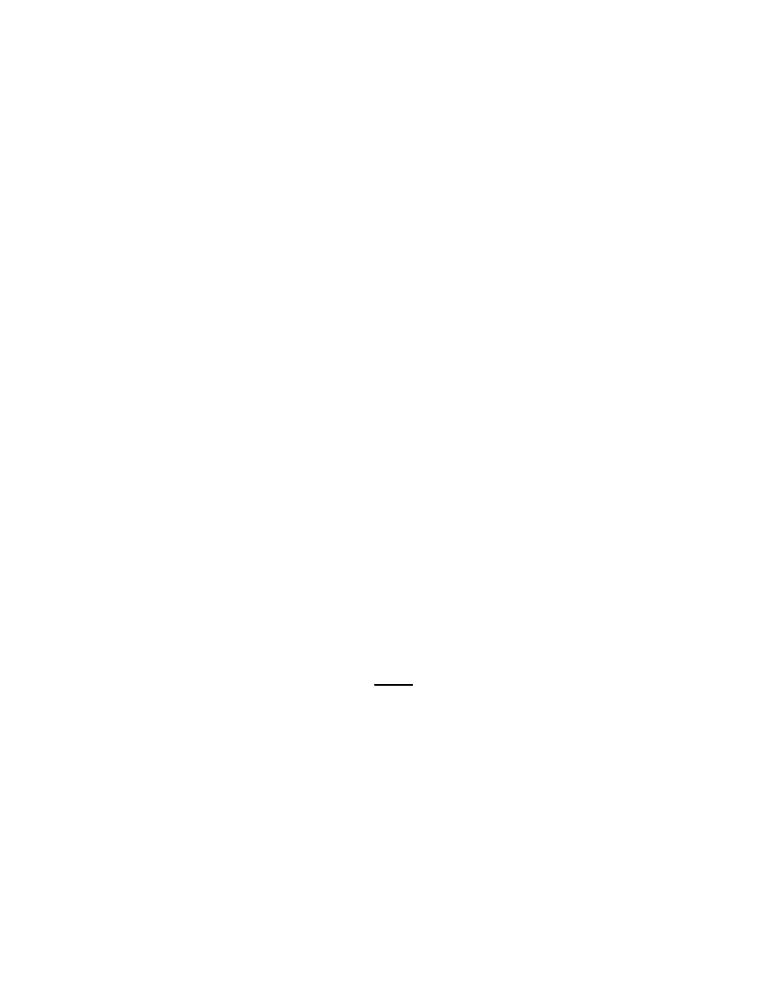


95.

**A pair of UNIFORMED COPS brawny and impassive, their arms folded, waiting to make sure she board the flight.**

**Clarice sighs, turning wearily back towards the jetway. The BACH CONTINUES, as we...**

**CUT TO:**

**INT. SHELBY CO. COURTHOUSE - HISTORICAL SOCIETY ROOM - NIGHT**

**CLOSE ON a steaming, rather elegant dinner tray, being carried by Pembry, as he approaches Dr. Lecter's cell.**

**PEMBRY**

(**shouts)**

**Ready when you are, Doc!**

**IN THE CELL**

**the BACH is issuing from the cassette player. Beside it, on the table, the pile of Dr. Lecter's drawings. The top one is an accurate, sensitive portrait, from memory, of Clarice. Beyond the table, we see Lecter's shadowy form, seated behind the paper screen. He calls out from there.**

**DR. LECTER** (**O.S.)**

**Just another minute, please!**

**Pembry grunts, sets the tray down. Boyle joins him, handing him a riot baton and a Mace cannister, which Pembry fastens to belt clips. Boyle is similarly armed, and carries a ring of keys.**

**PEMBRY**

**Sumbitch demanded lamb chops for**

**dinner, extra rare.**

**BOYLE**

(**laughs)**

**What you reckon he'll want for**

**breakfast - some fuckin' thing from**

**the zoo?**

**INSIDE THE SCREEN**

**Dr. Lecter sits fully clothed on the toilet - swaying slightly, eyes closed, lost in the music, tongue working in his cheek. Suddenly, like magic, a little shiny piece of metal protrudes from his lips. He plucks it out, opens his eyes.**

96.

**IN EXTREME CLOSEUP**

**he is holding the pocket clip from Prentice's disassembled pen - a straight, thin strip of metal, with a circular collar at one end, a square edge at the other.**

**DR. LECTER**

**lines up his thumbnail just shy of the square edge, then braces it against the stainless steel toilet rim. He pushes down, hard, using both hands for leverage. After a moment he smiles, holding up the result, and twirling it before his eyes.**

**IN EXTREME CLOSEUP**

**the straight end of the clip now forms a tiny right angle, and the circular end anchors nicely between his fingers.**

**OUTSIDE THE CELL**

**Pembry and Boyle turn as the toilet FLUSHES, and Dr. Lecter reappears, looking jaunty.**

**PEMBRY**

**Okay, Doc, grab some floor. Same drill**

**as lunchtime.**

**Dr. Lecter sits on the floor, legs straight, then wriggles backwards. He stretches his arms behind him, hands and wrists through the bars, with two bars between them, and clasps his hands.**

**DR. LECTER**

**I'm ready when you are, Officer Pembry.**

**Pembry comes around the cell to squat behind Dr. Lecter. He tugs his hands farther out, rather roughly, handcuffs his wrists. He shakes the cuffs, making sure of them, then nods to Boyle.**

**NEW ANGLE - AT CELL DOOR**

**as Boyle picks up the dinner tray, and Pembry crosses around. Pembry takes the keys from Boyle, unlocks the cell door, and pushes it inward. Boyle goes inside with the tray.**

**DR. LECTER**

**watches as Boyle approaches the table, above five feet from him. Boyle has to set his tray down on the floor to clear off some of the mess of drawings. The MUSIC plays on.**


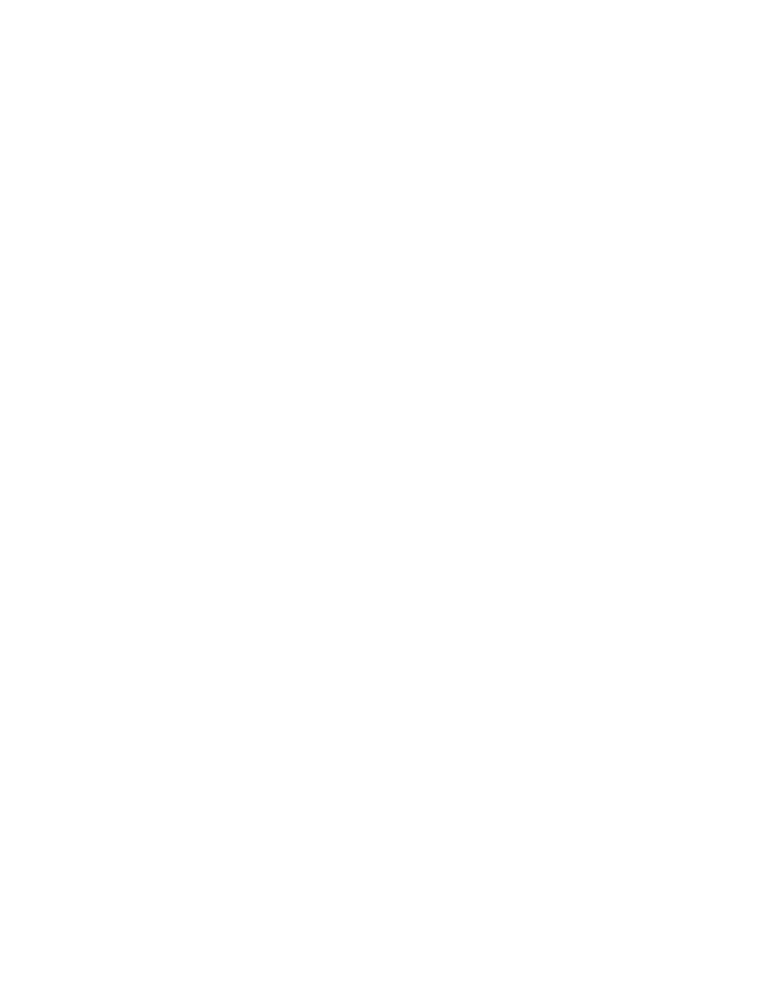


97.

**VERY CLOSE ON**

**... Dr. Lecter's hands, outside the bars, as the makeshift key, held between the tips of his right index and middle fingers, searches for the keyhole of the cuffs. And finds it.**

**NEW ANGLE - FAVORING BOYLE**

**as he finishes clearing the drawings, then turns back towards Dr. Lecter, stooping to pick up the tray.**

**BOYLE'S RIGHT HAND**

**is just inches from the tray when Dr. Lecter's hand darts INTO SHOT, snapping a handcuff onto his wrist.**

**BOYLE**

**looks up, astonished, to find himself right in the grinning face of Dr. Lecter - who just as quickly rolls sideways, and snaps -**

**THE OTHER CUFF**

**around the bolted leg of the table. And suddenly all natural SOUND and MOTION are suspended, as the MUSIC soars much louder, each separate note of it now echoing distinctly, and we see...**

**VARIOUS ANGLES - EACH BLURRING INTO STOP-ACTION**

**Pembry starting into the cell, reaching for his riot baton...**

**Dr. Lecter smashing against the cell door, driving it into Pembry, pinning him across the chest, against the door frame...**

**Boyle, on one knee on the floor, digging desperately in his pants pocket for his handcuff key...**

**Pembry's hand, mashed against his body by the door, as he strains frantically to reach the baton at his waist...**

**Pembry's eyes, widening in horror as he stares at...**

**Dr. Lecter's bared teeth, flashing towards him...**

**Dr. Lecter gripping Pembry's face in his jaws, shaking it like a dog shakes a rat...**

**Boyle finding his key, but in his terror dropping it...**

98.

**Dr. Lecter yanking the mace can and riot baton from the dazed Pembry's belt, spraying him in his bloody face, then clubbing him to his knees...**

**Boyle, mouth open in a silent scream, finding his key again, unlocking the handcuff, but then, as he starts to rise, seeing...**

**Dr. Lecter standing over him, with the riot baton raised high; he swings it viciously down, again and again and again... Then normal SOUND and MOTION are restored as we go to -**

**CLOSE ANGLE ON**

**the cassette player, and the portrait of Clarice, both now flecked with blood. In addition to the Bach, we now hear soft PANTING, close by, and whimpering SOBS in the background.**

**ANGLE ON DR. LECTER**

**eyes closed, lost in a favorite passage of the music. His bloody fingers drift airily with the notes, as his breathing slows to normal. He opens his eyes, sighs contentedly, looks down.**

**HIS POV**

**By the sprawled legs of Boyle lie various objects that spilled from his pants pocket - coins, a comb, a big pocketknife.**

**DR. LECTER**

**picks up the pocketknife, examines it happily. About a four-inch blade. He becomes aware of the WHIMPERING, off screen, turns.**

**LOW ANGLE ON PEMBRY**

**as he crawls, with torturous slowness, towards the command desk, and the phone. He is crying, but frantically determined.**

**PEMBRY'S POV - PARTIALLY BLURRED, THEN CLEARING**

**Above the desk, hanging from pegs, are his and Boyle's holstered revolvers...**

**CUT TO:**


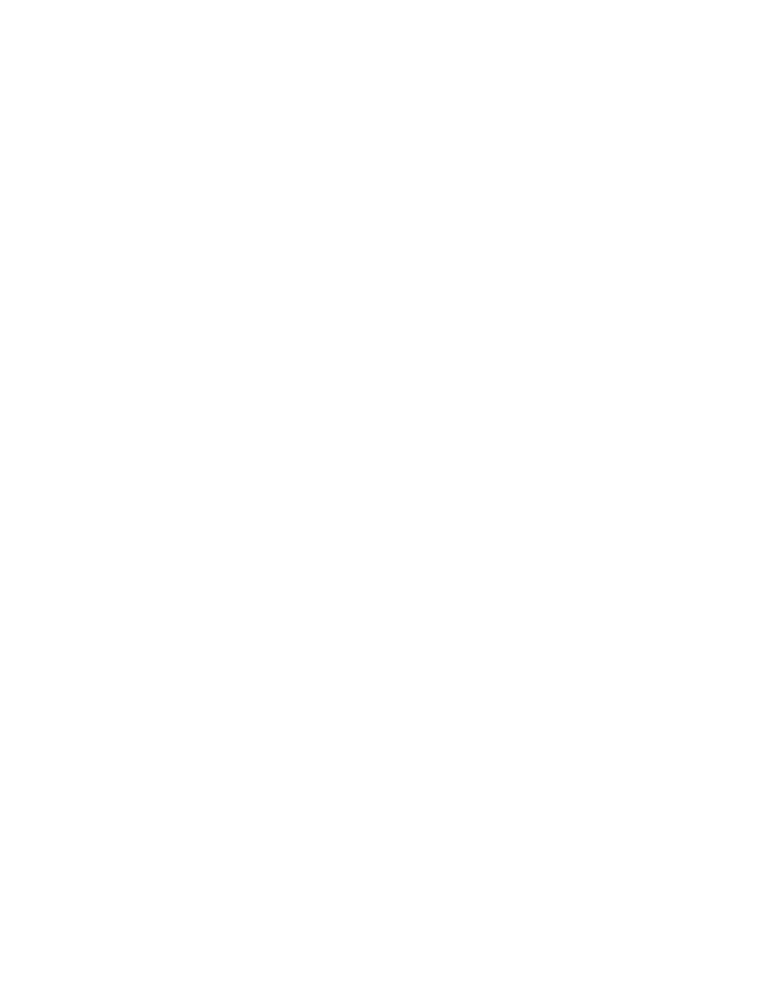


99.

**INT. COURTHOUSE - GROUND FLOOR LOBBY** - **NIGHT**

**The bronze arrow above the elevator swings towards "5," then indicates a stop there, at the top floor.**

**FAVORING SGT. TATE**

**at his command desk, as he stares at the indicator. Another cop, JACOBS, sits on the desk's edge, flipping through a magazine; many more cops can be seen beyond them, idling in the lobby.**

**SGT. TATE**

**What is this shit...? Did somebody go**

**up to five?**

(**Jacobs shakes his**

**head)**

**Call Pembry, ask him what -**

**A GUNSHOT, and then, moments later, TWO MORE quick ones, echo down the nearby stairwell. Sgt. Tate jumps to his feet, grabs a radio mike, as the other cops stir, confused and noisy.**

**SGT. TATE**

(continuing; **into**

**mike)**

**CP, shots fired on five! Repeat, shots**

**fires on five! Outside posts look**

**sharp, we've got a... Ho-ly shit.**

**THE BRONZE ARROW**

**has begun to descend. Down to 4, then past 4...**

**BACK ON SGT. TATE**

**as he reacts. The other cops, behind him, are now in a full uproar, shouting, pulling out guns.**

**SGT. TATE**

(**to the others)**

**SHUT UP...! Guard mount, double up on**

**your outside posts. Bobby, get the**

**vests. Rainey, Howard, cover that**

**fucking elevator if it comes all the**

**way to -**

**A COP** (**O.S.)**

**It stopped!**


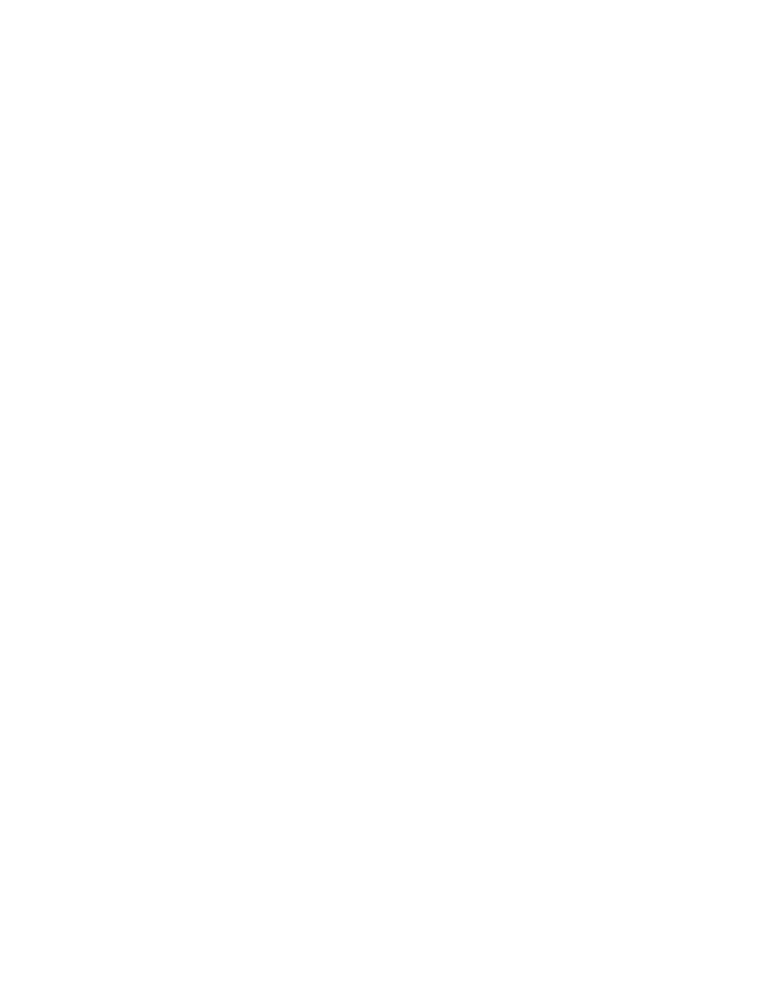


100.

**THE BRONZE ARROW**

**has, indeed, frozen at 3.**

**Sgt. Tate lifts the microphone again.**

**SGT. TATE**

(**into mike)**

**Seal off a ten-block radius. Get me**

**the SWAT team and an ambulance, double**

**quick. We're going up.**

**CUT TO:**

**INT. STAIRWELL - NIGHT (DIMLY LIT)**

**HIGH ANGLE on Sgt. Tate as he leads a five-man squad, all in bulletproof vests, up the stone stairs. They move fast but carefully, covering each other from landing to landing with drawn revolvers, shotguns. The distant Back MUSIC makes a ghostly echo in here...**

**CUT TO:**

**INT. THIRD FLOOR CORRIDOR - NIGHT (DIMLY LIT)**

**A thin rectangle of light on the floor from the open elevator door. We can't see inside. The MUSIC sounds closer.**

**SGT. TATE**

**approaches very cautiously, gun aimed. The other cops, behind him, fan out silently to set up angles of fire, checking the various office doors - all locked - as they creep up.**

**MOVING ANGLE - OVER TATE'S SHOULDER**

**as he reaches the side of the elevator, hesitates, then spins to point his gun inside. It's empty. He backs away.**

**SGT. TATE**

(**shouts at ceiling)**

**Pembry? Boyle...?**

**CUT TO:**

**INT. HISTORICAL SOCIETY ROOM - NIGHT (BRIGHTLY LIT)**

**ANGLE on the door, from inside, its lettering reversed on the frosted glass. The Bach is VERY LOUD.**

101.

**After a moment the door is shouldered open, hard enough for the glass to shatter, Tate following his gun inside, moving low, then other cops appearing behind him in the doorframe. They all freeze, staring in utter horror.**

**SGT. TATE**

**Oh no... no...**

**THEIR POV**

**is a brief snapshot from hell. The two uniformed bodies, one sprawled on its back near the door, the other still in the cell, have been savaged by a knife. Blood and gore everywhere. The faces are unrecognizable.**

**SGT. TATE**

**struggles for control, as the other cops move grimly around him, into the room. He pulls his walkie-talkie from his belt.**

**SGT. TATE**

(**into mike)**

**Command post... Two offi-**

(**a beat; clears his**

**throat)**

**Two officers down. Prisoner is**

**missing. Repeat, Lecter is missing...**

**He's stripped the bed, might be making**

**a rope, check all windows. Where the**

**fuck is my ambulance?**

**IN THE CELL**

**a cop angrily punches OFF the music. Jacobs kneels with his fingers on Boyle's neck.**

**JACOBS**

**Boyle is dead, Sarge. His gun's gone...**

**AT THE OTHER BODY**

**a cop gently removes a revolver from the bloody fist. Murray, the young patrolman, brings his ear reluctantly close to the gory face. A bloody bubble appears there; the wreckage GROANS, very softly.**

**MURRAY**

**This one's alive!**

**Tate crosses, kneels to see for himself. Murray looks green.**


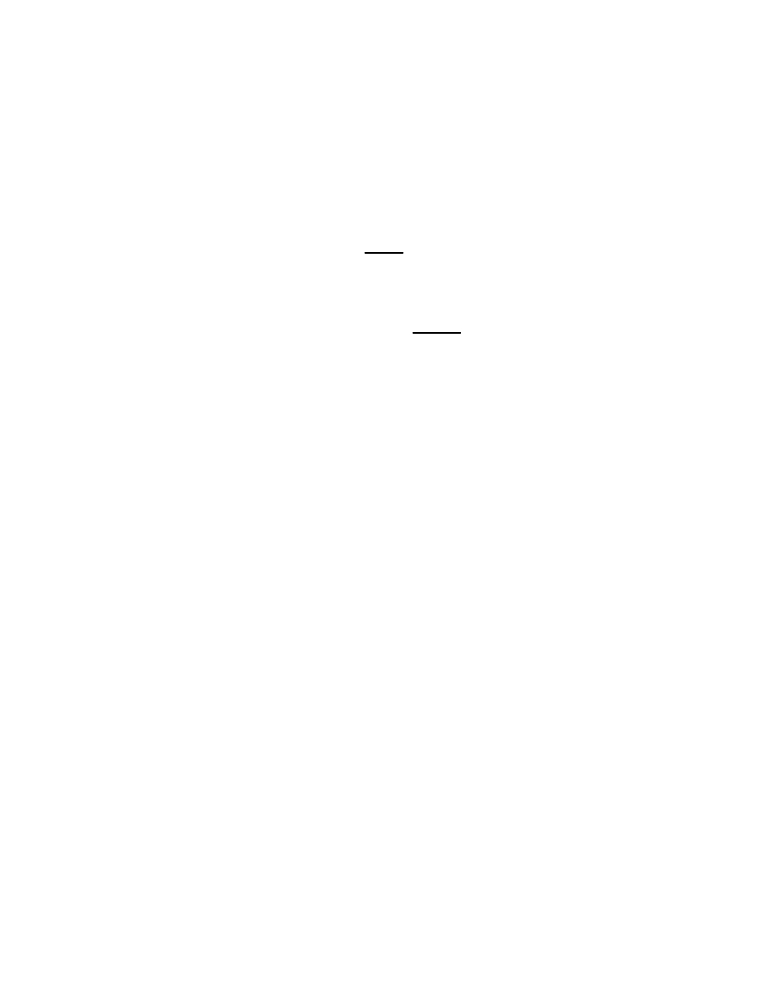


102.

**SGT. TATE**

**Take ahold of him where he can feel**

**your hands, son. Talk to him.**

**MURRAY**

**What's his name, Sarge?**

**SGT. TATE**

**It's Pembry, now talk to him, God**

**dammit.**

(**into radio, looking**

**around)**

**Boyle's dead, Pembry's read bad.**

**Lecter is missing and armed - he took**

**Boyle's gun...**

**The other cop, checking the cylinder of Pembry's gun, holds up one finger to Tate.**

**SGT. TATE**

(continuing; **into**

**radio)**

**Pembry got off one round - there's a**

**chance Lecter was hit. We heard a**

**total of three shots fired, so he's**

**got four left... He's got a knife, too.**

**CUT TO:**

**EXT. STREET IN FRONT OF COURTHOUSE** - **NIGHT**

**VARIOUS ANGLES on a floodlit scene of barely controlled pandemonium. Flashing red lights, men shouting commands, SIRENS in the distance. SWAT members, in full gear, leap from a black van... fan out... swarm up the steps... EMS orderlies unload a gurney from an ambulance... Cops kneel for cover behind cars, aiming guns and rifles up at the windows...**

**CUT TO:**

**INT. HISTORICAL SOCIETY ROOM** - **NIGHT**

**A trio of EMS orderlies work fast over the body, already strapped on its gurney. Then bandage a big plastic airway into place, over the butchered face, checking for a pulse at the neck. Young Murray crouches, sickened, gripping a bloody fist.**

**MURRAY**

**You're just fine, Pembry, lookin'**

**good, buddy, you're gonna make it...**

103.

**One orderly massages the heart. Another is popping a plasma bag, ready to insert the needle, when the body starts convulsing.**

**ORDERLY**

**Downstairs - let's go!**

**Quickly the gurney is elevated, wheeled out of the room, with cops rushing forward to open the doors, help push, SWAT men are running by in the hall, automatic rifles at the ready...**

**CUT TO:**

**INT. THE ELEVATOR - DESCENDING** - **NIGHT**

**Sgt. Tate, riding down with Jacobs, has his radio out.**

**SGT. TATE**

(**into mike)**

**Ten-four, Lieutenant. I'm on the**

**elevator, bringing it down. Pembry and**

**Boyle are both cleared, top three**

**floors secured, main stairwell**

**secured. He's somewhere on -**

**A spot of blood falls on his cheek. He and Jacobs stare at each other. Another spot hits his shoulder. They look up.**

**THEIR POV**

**Blood is dripping slowly from the corner of the service hatch.**

**Sgt. Tate motions for silence, as both men draw their guns.**

**SGT. TATE**

(**into mike)**

**Uh, we're pretty sure he's somewhere**

**on two, sir... That's all for now,**

**over.**

**CUT TO:**

**INT. GROUND FLOOR LOBBY** - **NIGHT**

**The elevator doors open, and Tate and Jacobs hurry out, stepping quickly to the side. Tate reaches back in and -**

**CLOSE ANGLE**

**Locks the elevator into position, with its doors open.**

104.

**OTHER COPS are rushing up to them, curious, as Tate frantically pushes them aside, gesturing for silence.**

**SGT. TATE**

(**whispers)**

**He's on the roof of the elevator!**

**CUT TO:**

**INT. THIRD FLOOR CORRIDOR** - **NIGHT**

**Two SWAT officers, PETERSON and KUBELL, turn a key, unlocking and opening this floor's elevator doorway. The shaft is dark. Lying prone, they inch up to the edge, Peterson extends a mirror, on a long pole, out into the shaft.**

**IN THE MIRROR (DISTORTED BY THE ANGLE)**

**Is a distant figure, in a green prison jumpsuit, lying on his stomach, atop the elevator. A shiny revolver is near one hand.**

**PETERSON**

**whispers into a radio, as Kubell carefully tips an assault rifle, with a flashlight taped to its barrel, over the edge.**

**PETERSON**

**I see him... There's a weapon by his**

**hand. He's not moving...**

**RADIO VOICE**

**Can you get the drop?**

**PETERSON**

**We got the drop.**

**RADIO VOICE**

1. **ne warning. Then take him out.**
2. **eterson nods to Kubell, who switches ON the flashlight, as Peterson shouts down the shaft.**

**PETERSON**

**Quinn!! put your hands on your head!!**

**IN THE MIRROR**

**the green figure shows no movement.**

105.

**ANGLE ON THE COPS AGAIN**

**as Peterson mutters to Kubell.**

**PETERSON**

**Put one in his leg.**

**VERY CLOSE ON**

**The figure below, as Kubell's gunshot ROARS, echoing hugely in the shaft, and a slug rips through the jumpsuited leg. The figure doesn't stir.**

**PETERSON**

**staring down the shaft, raises his mike again.**

**PETERSON**

**No movement.**

**RADIO VOICE**

**Okay, Johnny, hold your fire...**

**CUT TO:**

**INT. GROUND FLOOR LOBBY** - **NIGHT**

**A small army of cops is now covering the elevator doorway, from both sides. Tate crouches next to the SWAT COMMANDER.**

**SWAT COMMANDER**

(**into radio mike)**

**We're coming into the car, we're**

**opening the hatch. Watch his hands.**

**Any fire will come from us. Affirm?**

**Got it.**

**PETERSON'S VOICE**

**The SWAT commander hands his radio to another cop, then looks at Tate. A long, tense moment. Then he waves a signal.**

**MOVING ANGLE**

**as we follow a picked team of four SWAT cops, in full body armor, rushing into the elevator car. Two men move to the corners, aim assault rifles at the ceiling. A third man sets a stepladder in place, and the fourth man, armed with a big Colt, hurries up the ladder and unclips the hatch.**


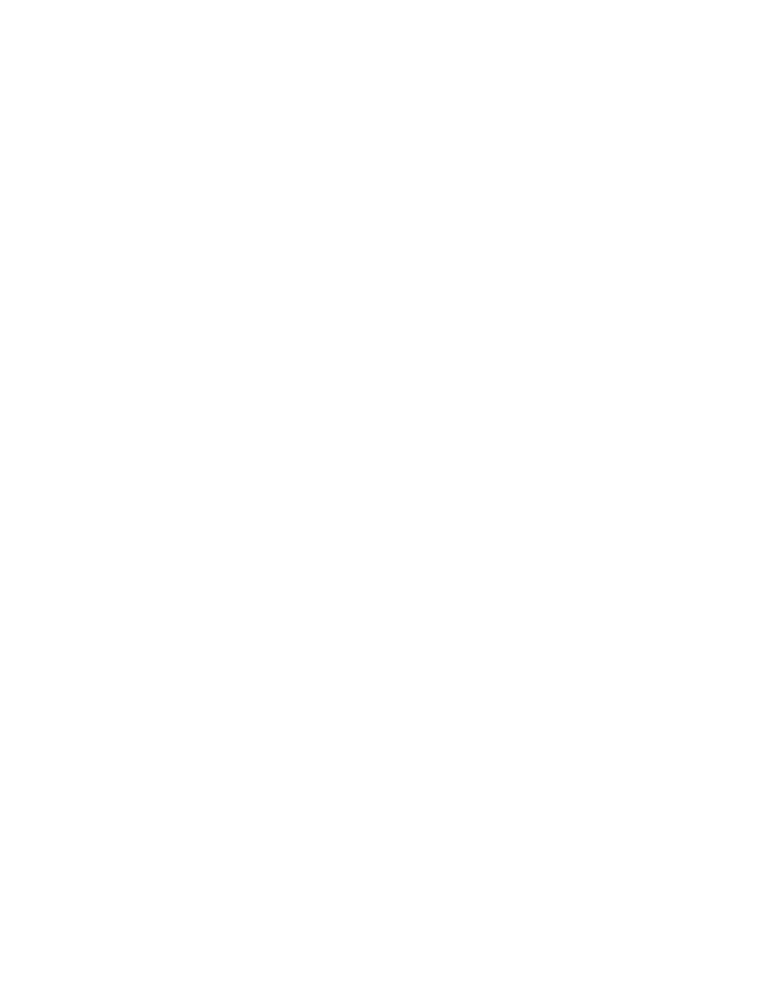


106.

**CLOSE ON**

**... the service hatch, as the hinged cover drops open, and a body tumbles through, dangling head first, until it's caught at the waist. We see the back of the head.**

**SGT. TATE**

**shoulders through the SWAT cops for a closer look. He turns towards the SWAT commander, astonished.**

**SGT. TATE**

**That's Pembry!**

**CUT TO:**

**INT. EMS AMBULANCE** - **MOVING**

**In the rear chamber, a young EMS ATTENDANT is braced against the vehicle's sway. Behind him, the stretchered form of his patient, and, through a curtained opening, the driver. SOUND of the siren.**

**ATTENDANT**

(**into radio mike)**

**He's comatose, but his vital signs are**

**good. Pressure's 130 over 90... Yeah,**

**90! Pulse 85...**

**Behind him, in slightly BLURRED FOCUS, the bloody figure sits slowly upright...**

**ATTENDANT**

(continuing)

**His convulsions have stopped, but he's**

**got so much loose skin on his face,**

**it's hard to tell if -**

**Suddenly he stops, becoming aware of a strange HISSING. He turns, puzzled...**

**THE POCKETKNIFE BLADE**

**in Lecter's fist, flashes high in the air...**

**CUT TO:**

**EXT. SIX-LANE FREEWAY - NIGHT (ARC LIGHTS)**

**MOVING ANGLE on the EMS ambulance, as it races along normally, its SIREN blazing, the heavy flow of traffic parting to make way for it.**

107.

**Then suddenly it begins to weave erratically, changing lanes, before drifting dangerously to a full stop, almost side-ways. Cars swerve to avoid hitting it, HONKING angrily...**

**CLOSER ANGLE**

**on the stopped ambulance. After a long, still moment, the wind-shield wipes come one, incongruously, then stop. Then the SIREN is shut OFF, and the flashers. The ambulance starts rolling again - at first jerkingly, then with increasing speed. We follow it for several more moments, until is passes - and we LINGER on...**

**A BIG GREEN INTERSTATE SIGN**

**... that reads "Memphis International Airport / 2 miles." CLOSE ANGLE - THROUGH AMBULANCE WINDSHIELD**

**Dr. Lecter's face is slowly REVEALED, as he wipes across it with a fistful of gauze, tossing it aside...**

**DISSOLVE TO:**

**EXT. MONTANA PLAIN - DUSK - (IN FLASHBACK)**

**MOVING ANGLE, rushing with dizzy swiftness over the prairie, over waving grasses... a long passage... before we come at last to the girl Clarice, sitting with her lamb, hunched in despair. She rises, her face tear- stained, and turns from us. Holding the lamb, she starts back the way she came...**

**CUT TO:**

**EXT. COUNTRY DIRT ROAD - NIGHT - BRIGHT MOONLIGHT**

**MOVING ANGLE, very rapid, down this road... coming at last to a stopped highway patrol car. Clarice, with her lamb, is standing in the car's headlights. She starts wearily towards the sheriff...**

**CUT TO:**

**EXT. RANCH BARNYARD - NEAR DAWN**

**CRANE ANGLE - sweeping rapidly DOWN into the barnyard towards the arriving highway patrol car, as it stops... RUSHING to the little girl as she steps from the car, holding the lamb.**

108.

**The dark figure of the rancher ENTERS FRAME. As he roughly takes the lamb from her, we HOLD on a CLOSEUP of her**

**face - stunned, blank. She EXITS FRAME...**

**CUT TO:**

**EXT. BARN** - **NIGHT**

**MOVING ANGLE - CLARICE'S POV as she walks towards the open barn doorway... It looms CLOSER... The rancher is revealed, a shadowy figure, pinning the lamb on the killing table. His knife hand sweeps up high, then holds... He turns TO CAMERA, his face breaking into the light - and it is the face of Dr. Lecter. He smiles his terrible smile at the young Clarice...**

**CUT TO:**

**INT. FBI DORM - PAY PHONE IN HALLWAY** - **NIGHT**

**MOVING ANGLE - coming in very CLOSE on the adult Clarice's face -shocked, devastated - as she stands alone by the dangling receiver...**

**CUT TO:**

**INT. SHOWER STALL - FBI DORM** - **NIGHT**

**CLOSE ON a shower head, as water suddenly blasts out. Clarice moves INTO SHOT, as she scrubs her face and hair compulsively, almost desperately, unable to get clean...**

**ARDELIA** (**V.O.)**

**They found the ambulance...**

**CUT TO:**

**INT.CLARICE'S DORM ROOM** - **NIGHT**

**Clarice is hunched on her cot, in a bathrobe, her hair wet. The Buffalo Bill case file, a think bundle, rests by her feet. Ardelia hovers anxiously nearby.**

**ARDELIA**

**In the parking garage at Memphis**

**airport. The crew was dead. He killed**

**a tourist, too. Got his clothes,**

**cash... By now he could be anywhere.**

**Clarice looks up. Her eyes are red-rimmed with exhaustion, and something close to despair. She reads Ardelia's thought.**


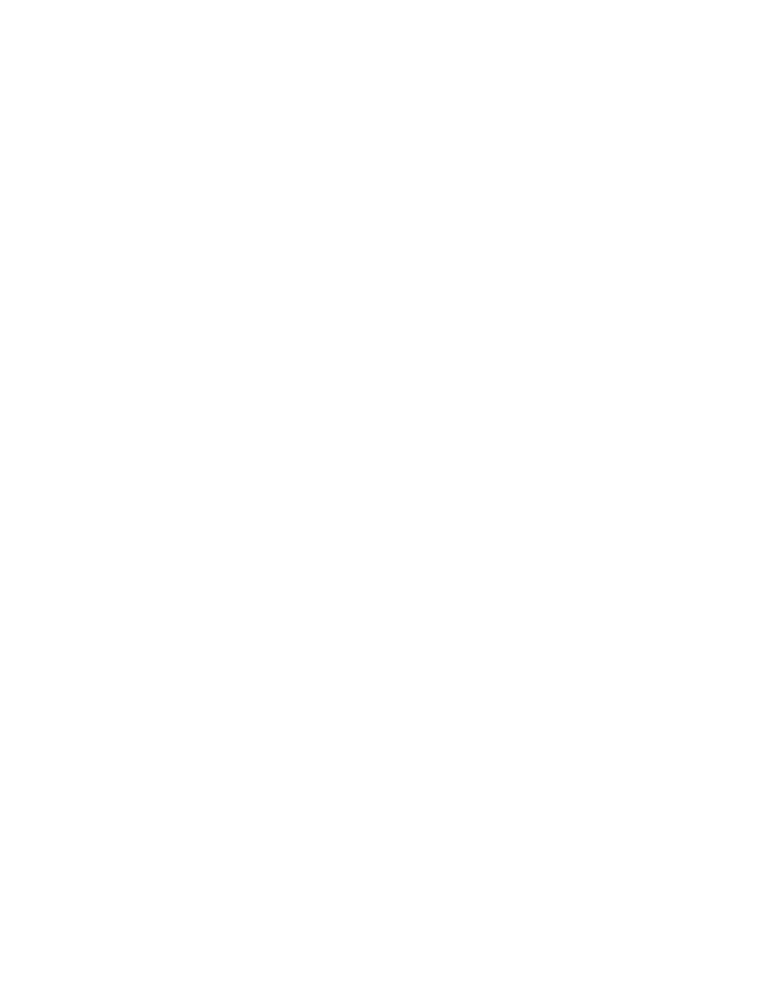


109.

**CLARICE**

**No. He won't come after me.**

**Why not?**

**ARDELIA**

**CLARICE**

(**bitterly)**

**It would be rude. And he wouldn't get**

**to ask any more questions...**

**Ardelia sits beside her, touches her arm.**

**ARDELIA**

**Clarice - you did the best anybody**

**could have for Catherine Martin. You**

**stuck your neck out for her and you**

**got your butt kicked for her and you**

**tried. It's not your fault it ended**

**this way.**

**CLARICE**

**The worst part - the thing that's**

**making me crazy - is that Bill is**

**right in front of me. Only I can't see**

**him...**

(**touching the case**

**file)**

**Lecter said, everything I need to**

**catch him is right here, in these**

**pages...**

**ARDELIA**

**Lecter said a lot of things.**

**CLARICE**

(**shakes her head)**

**He's here, Ardelia.**

**Ardelia stares back at her. SOUND UPCUT - the low throb of a washing machine...**

**CUT TO:**

**INT. LAUNDRY ROOM - ACADEMY DORM - NIGHT (VERY LATE) Clarice has spread out the case file across two washing**

**machines. Ardelia, cross-legged on a dryer, studies another pile of forms. Nearby is their laundry basket, detergent box.**


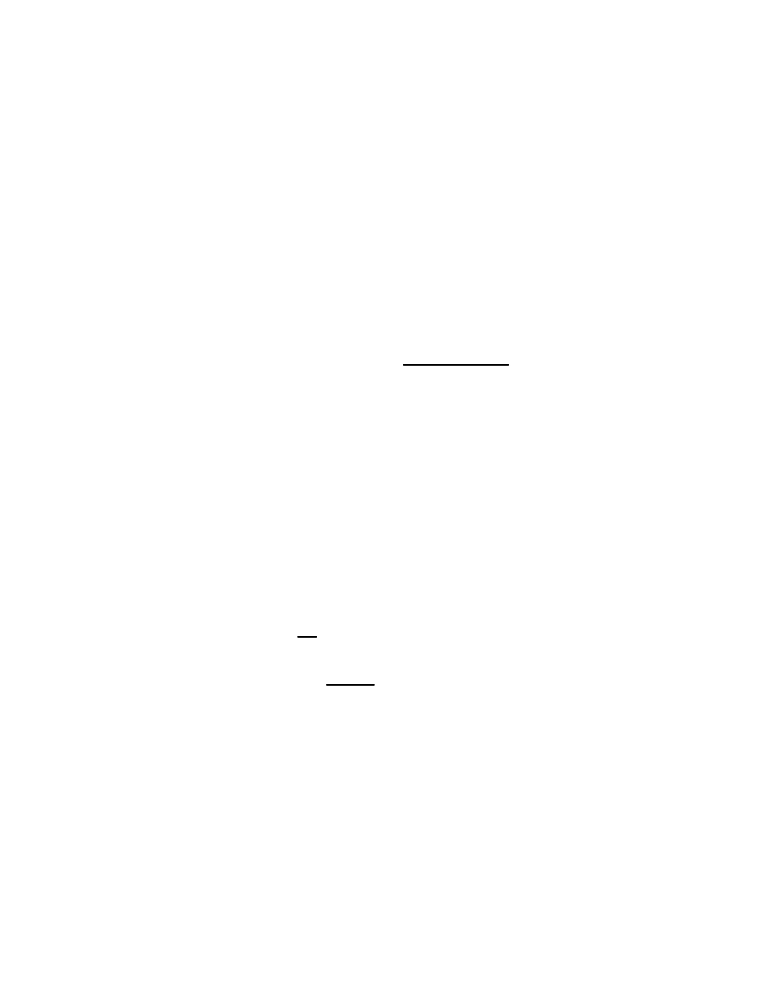


110.

**ARDELIA**

(**surprised)**

**Hey, is this Lecter's handwriting?**

**She holds up the map, with its location markings for the kidnapping and body dump sites. Clarice takes it, looks.**

**INSERT - THE MAP**

**with newly inked words in Dr. Lecter's precise, elegant hand.**

**DR. LECTER** (**V.O.)**

**Clarice, doesn't this random**

**scattering of sites seem overdone to**

**you? Doesn't it seem desperately**

**random - like the elaborations of a**

**bad liar? Ta... Hannibal Lecter.**

**NEW ANGLE - TWO SHOT**

**as Clarice looks up at Ardelia, puzzled but excited.**

**CLARICE**

**"Desperately random." What does he**

**mean?**

**ARDELIA**

**Not random at all, maybe. Like there's**

**some pattern here...?**

**CLARICE**

**But there is no pattern. There's no**

**connection at all among these places,**

**or the computers would've nailed it!**

**They're even found in random order.**

**ARDELIA**

**Well, except for the one girl.**

**CLARICE**

(**beat)**

**What girl?**

**ARDELIA**

**The one that was weighted down. Where**

**is she...? Fred something.**

**They search among the inserts. Clarice finds the graduation photo.**


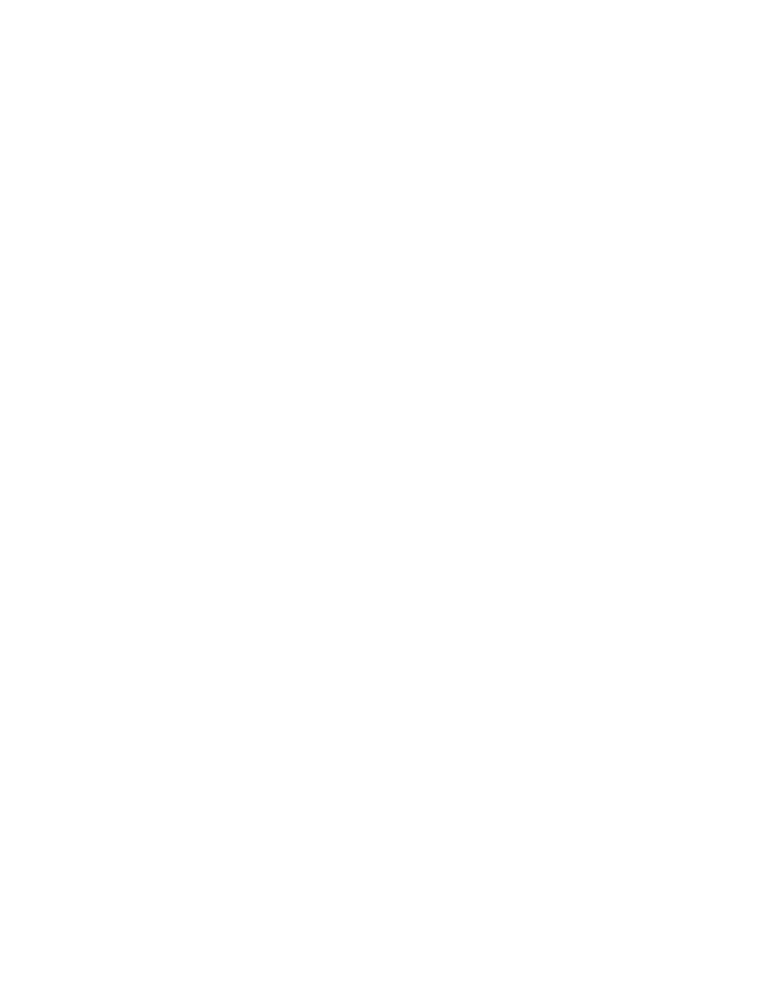


111.

**CLARICE**

**Fredrica Bimmel, from Belvedere, Ohio.**

**The first girl taken, but the third**

**body found... Why?**

**ARDELIA**

**'Cause she didn't drift. He weighted**

**her down.**

**CLARICE**

1. **ut why? He didn't weight the others.**
2. **larice moves, on fire, unable to keep still.**

**CLARICE**

(continuing)

**The first, what the hell did Lecter**

**say about... "First principles," he**

**said. Simplicity... What does this guy**

**do, he "covets." How do we first start**

**to covet? "We covet what we see -"**

**She stops, turns. She grabs the photo of Fredrica from Ardelia, stares at it. She looks up, trembling.**

**CLARICE**

(continuing)

**"- every day."**

**ARDELIA**

(**softly)**

**Hot damn, Clarice.**

**CLARICE** (**V.O.)**

**He knew her...!**

**CUT TO:**

**INT. FBI BUILDING - OFFICE OF THE DIRECTOR** - **DAY**

**Clarice and Crawford are seated in front of Director Burke, who's at his desk. Another chair is empty, because Krendler is pacing. All four are nearing their boiling points.**

**CLARICE**

**Maybe he lives in this, this**

**Belvedere, Ohio, too! Maybe he saw her**

**every day, and killed her sort of**

**spontaneously. Maybe he just meant**

**to... give her a 7-Up and talk about**

**the choir. But then -**


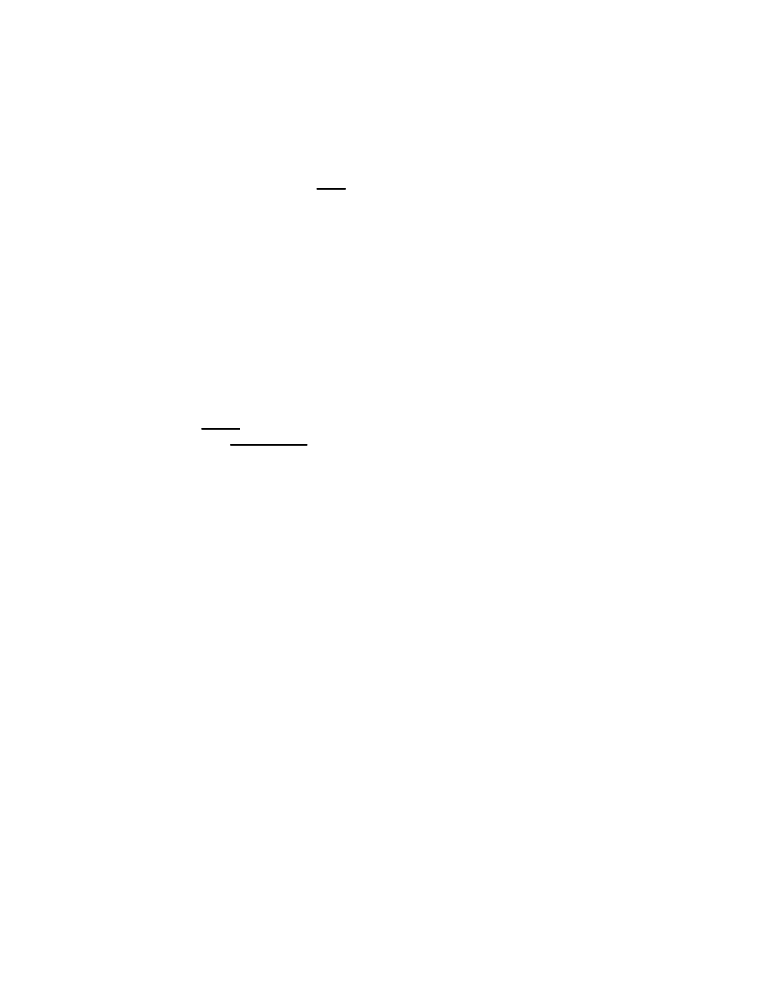


**KRENDLER**

**Starling -**

**CLARICE**

**But then he had to cover up, make her seem just like all the rest of them. That's what Lecter was hinting!**

**KRENDLER**

**The market in Lecter hints is way down, today, okay? I've got two good men dead in Memphis, and three civilians. I've got -**

**CRAWFORD**

**Who the hell's fault is -**

**KRENDLER**

**- a U.S. Senator who's half out of her head because her daughter's going to be murdered today! And all because of your mind games with fucking Lecter!**

**CRAWFORD**

**If you hadn't interfered, he'd still be in custody in Baltimore!**

112.

**Jack -**

**BURKE**

**KRENDLER**

**You sent in a green recruit, with a**

**phony goddamn offer -**

**CRAWFORD**

**You're just trying to cover your ass**

**for letting him escape!**

**BURKE**

**THAT'S ENOUGH! All of you...**

**A long silence, as they all struggle to regain composure. Crawford, who was at the point of striking Krendler, finally retakes his seat. Burke looks sadly at Crawford and Clarice.**

**BURKE**

(continuing; **very**

**reluctantly)**

**Starling, I'm afraid I have no choice.**

**You're suspended from the Academy.**

(more)


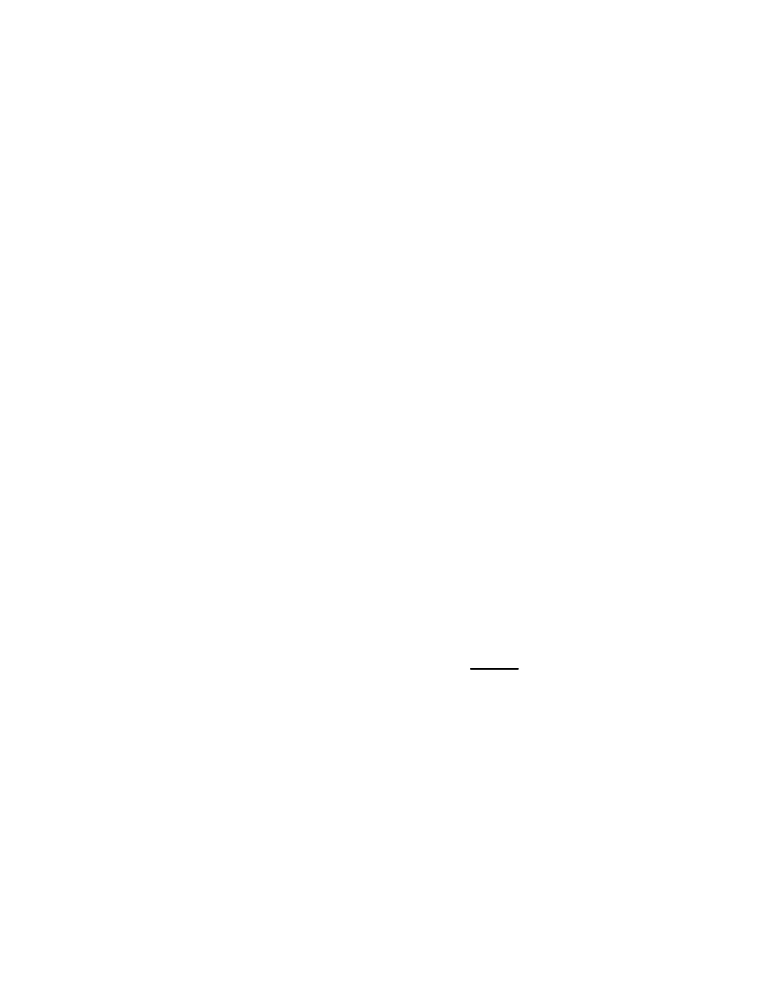


113.

BURKE (cont'd)

(**Crawford starts to**

**interrupt)**

**Not another word!**

(**to Clarice)**

**This is pending a reevaluation of your**

**fitness for the service. I promise**

**you'll get a fair hearing.**

(**pause)**

**Jack... you're ordered to take**

**compassionate leave. You'll spend the**

**rest of the day briefing the AG's**

**office, then transfer command of the**

**task force, effective by 1800 hours.**

(**beat)**

**I'm sorry, Jack... Go home. Take care**

**of Bella.**

**Clarice and Crawford stare back at him, drained. A long and very painful silence. Not even Krendler looks happy.**

**CUT TO:**

**EXT. SIDEWALK OUTSIDE FBI BUILDING** - **DAY**

**Clarice and Crawford walk out slowly, stand there a moment, not knowing what to say, not wanting to face each other.**

**CLARICE**

**All his victims are women... His ob-**

**session is women, he lives to hunt**

**women. But not one women is hunting**

**him - except me. I can walk in a**

**woman's room and know three times as**

**much about her as a man would.**

(**beat)**

**I have to go to Belvedere.**

**CRAWFORD**

**You heard them. I don't have that**

**authority anymore.**

**CLARICE**

**You do until six p.m.**

**He stares at her sadly. He looks, for the first time, defeated, old beyond his years.**

**CRAWFORD**

**Ohio is cold ground. Picked over, ten**

**months ago. Our people worked it, so**

**did the locals.**


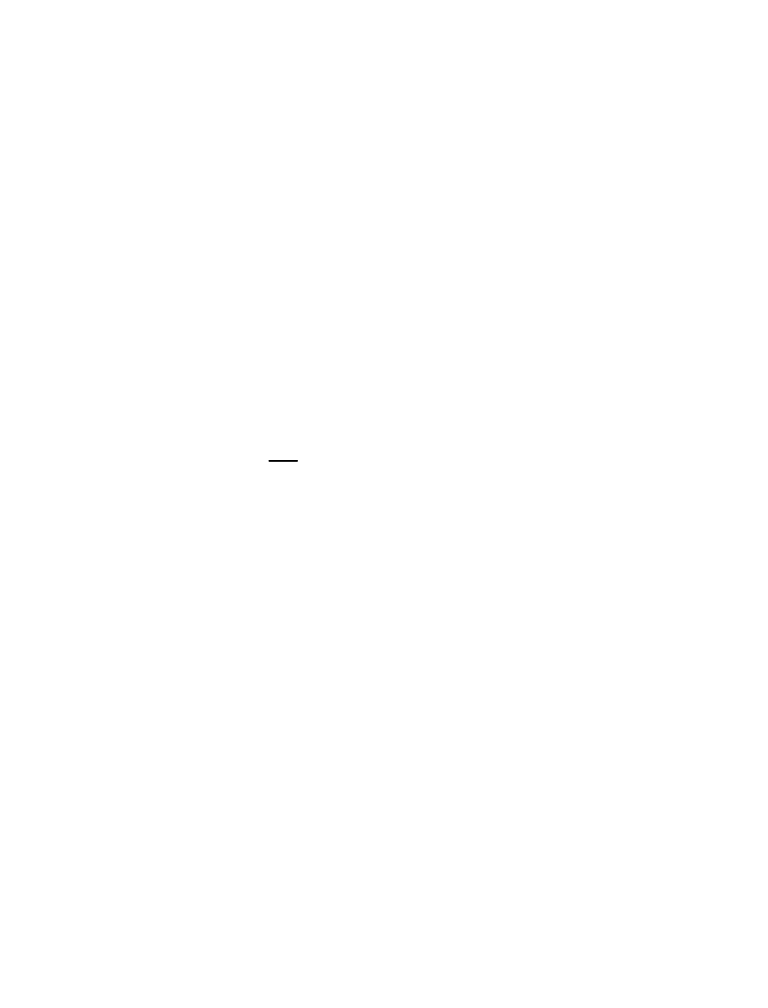


114.

**CLARICE**

**But not from this angle. Not thinking**

**he knew her. You've got to send me!**

**CRAWFORD**

**I'm Bureau for 28 years, Starling. I**

**won't disobey orders, not even now.**

**CLARICE**

**But I just became a private citizen.**

**I can go anywhere I want to.**

**CRAWFORD**

**With ID and a gun...? Impersonating a**

**federal agent is a felony.**

**CLARICE**

**He's going to kill her, Mr. Crawford.**

**This morning, or maybe at noon, but**

**today, and Belvedere's our last**

**chance. I'm flying there, right now,**

**unless you stop me. You want my ID?**

**Here - take it...**

**He stares at her, a long moment. Catherine's life. Clarice's passion, and future. His loyalty to the Bureau. Call it.**

**CRAWFORD**

(**pulls out his wallet)**

**There's about $300 here... And a**

**hotline code number. They'll patch you**

**through to me, wherever I am.**

**She raises her hand to him. She wants to touch him face, or his neck, but can't. Finally she takes his money and card.**

**Thank you.**

**CLARICE**

**He watches, frightened for both of them, as she backs away, smiles, then turns, racing towards the surveillance van.**

**SOUND UPCUT - the scratchy recording of Fats Waller SINGING, as we...**

**CUT TO:**


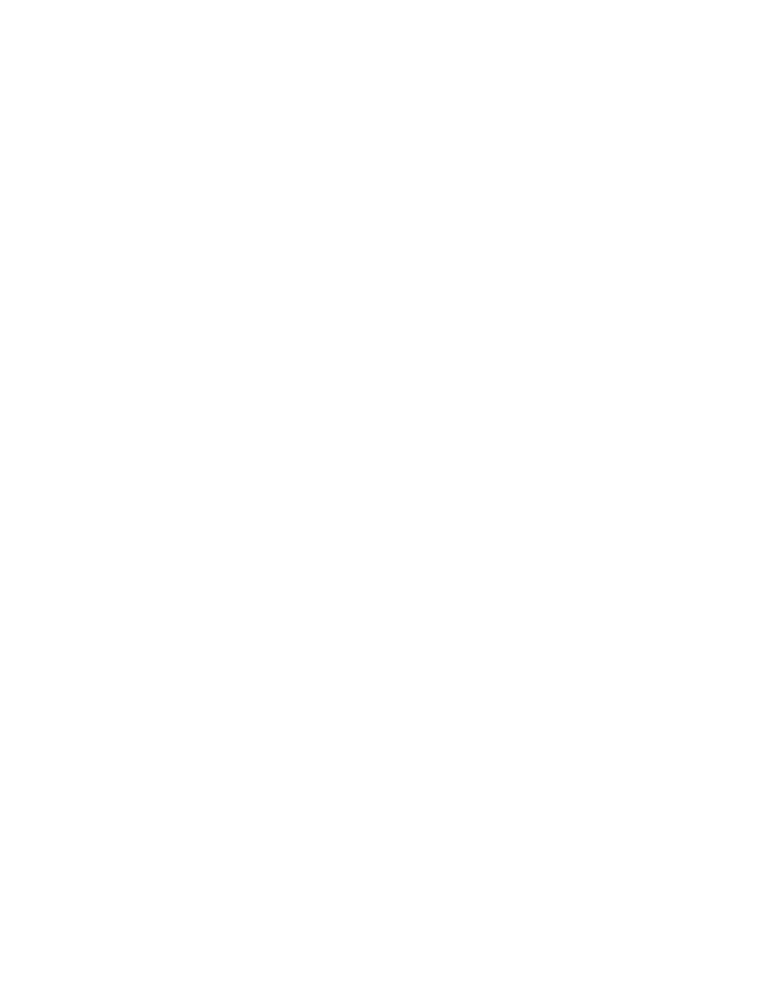


115.

**INT. MR. GUMB'S CELLAR - DAY (DIM LIGHT)**

**CLOSE ON the needle of the Victrola, on the spinning record, as Mr. Gumb's fingers lift away. MUSIC continues in background.**

**MR. GUMB** (**O.S.)**

(**calling out)**

**Preeeeecious...!**

**CLOSE ON the moth cage, as Mr. Gumb's fingers search through the humus, and find a plump new cocoon, lifting it out. The door of the cage is left open, and one or two of the adult moths flutter out.**

**MR. GUMB** (**O.S.)**

(continuing)

**Precious, come on Precious! Busybusy**

**day today...**

**CLOSE ON a clean towel, beside the sink. The cocoon is gently placed in readiness alongside four shiny skinning knives.**

**MR. GUMB** (**O.S.)**

(continuing)

**Momma's gonna be sooo beautiful!**

**CLOSE ON a stainless steel Colt Python, with a six-inch barrel, as the cylinder is spun, and the hammer gets a practice cock. The metallic CLICK is deep and loud. A note of alarm has entered Mr. Gumb's voice.**

**MR. GUMB** (**O.S.)**

(continuing)

**You come here this minute, you little**

**scamp!**

**LOW ANGLE on Mr. Gumb, wearing the kimono, as he walks through his sewing workroom. His back is to us; he is looking anxiously under the furniture. He stops, straightens. Genuinely scared.**

**MR. GUMB**

**Precious...?**

**LOW ANGLE - OVER THE PIT OPENING**

**Towards Mr. Gumb, as he stops at one of the doorways of the oubliette chamber. He stares inside; his face in shadows.**


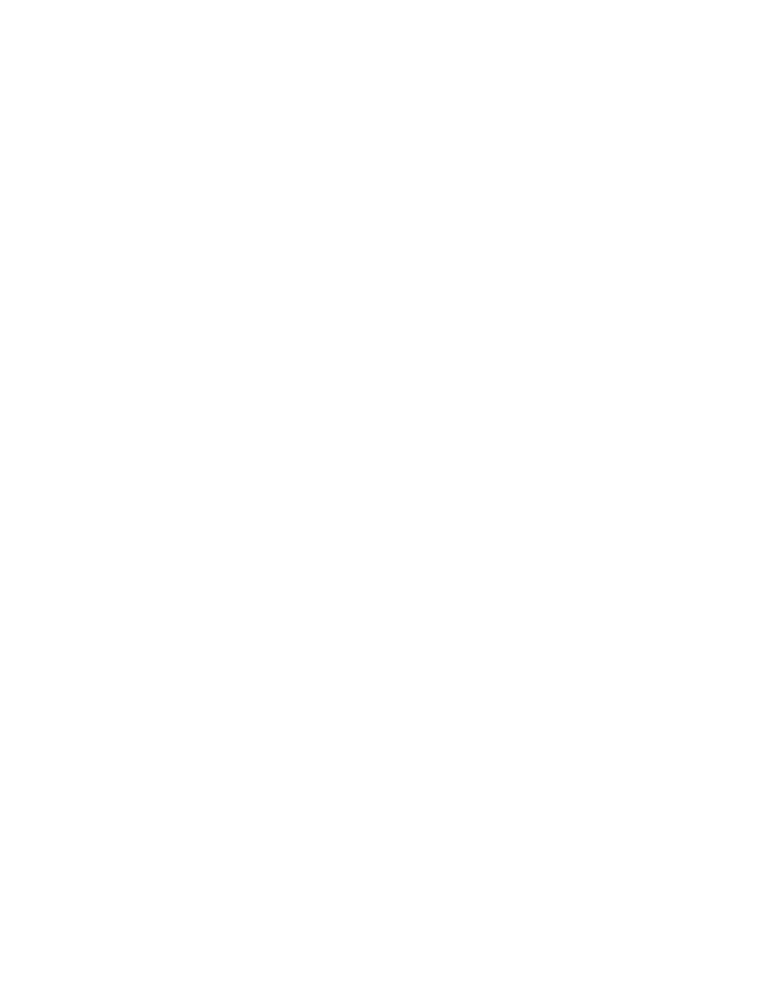


116.

**MR. GUMB**

**Sweetheart...?**

**From the distant bottom of the pit, we hear Catherine's voice.**

**CATHERINE** (**O.S.)**

**She'd down here you sack of shit.**

**Mr. Gumb's fist flies to his mouth, and he sags against the doorframe. A little groan escaped him; the dog answers with a series of YIPS.**

**UPWARD ANGLE, FROM THE PIT BOTTOM**

**as Mr. Gumb's dark shape leans cautiously over the edge.**

**MR. GUMB**

**Precious, are you all right?**

**REVERSE ANGLE ON CATHERINE**

**crouched to one side, clutching the dog to her chest. Seeing Mr. Gumb, the dog squirms frantically, BARKING.**

**CATHERINE**

**Get me a telephone. Lower it down to**

**me. Do it now, mister! I don't want to**

**have to hurt this little dog.**

**UPWARD ANGLE**

**on Mr. Gumb, as, with a cry of fury, he whips the Colt from inside his kimono. The muzzle gleams as he takes aim.**

**Catherine yanks the dog up, into his line of fire, screaming at him,.**

**CATHERINE**

**You shoot motherfucker you better kill**

**me quick or I'll break her fucking**

**neck, I swear to God!**

**MR. GUMB** (**O.S.)**

(**wails)**

**Nooooooo!**

**Tucking the dog under one arm, she grabs its muzzle, twisting the head. The dog WHINES piteously.**

**CATHERINE**

**Back off, you son of a bitch! Back off!**


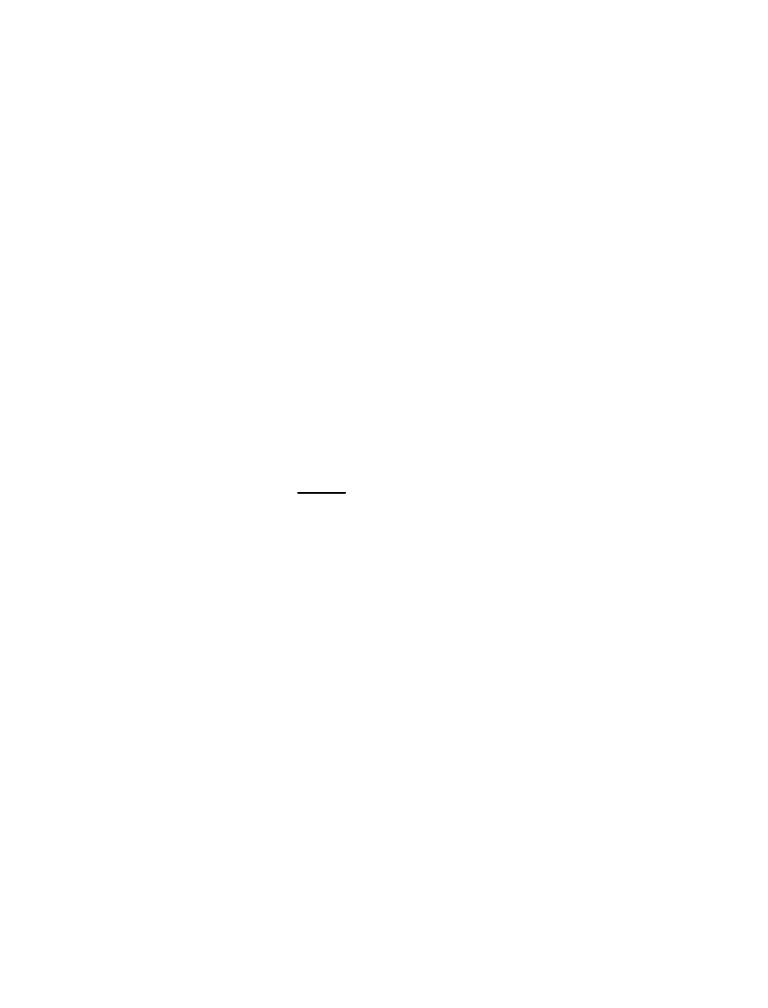


117.

**UPWARD ANGLE**

**as Mr. Gumb cries out again - a terrible, inarticulate scream of rage and anguish. But then he slowly lowers his gun.**

**REVERSE ANGLE**

**On Catherine, as she maintains her grip.**

**CATHERINE**

**That's better... Now get me a live**

**telephone. Get a long extension and**

**lower is down here... And you better**

**do it fast, too, 'cause I think her**

**leg's broken. She's in pain, mister,**

**she need a vest.**

**MR. GUMB**

**stares down at her, a long beat, breathing heavily.**

**MR. GUMB**

**You think she's in pain? You don't**

**know what pain is. But you're going to**

**find out...**

**And abruptly he vanishes. SOUND of his footsteps, rushing off.**

**CATHERINE**

**begins shaking, hands and arms twitching uncontrollably. She hugs the little dog tight to her chest, buries her face in its fur, sobbing...**

**DISSOLVE TO:**

**EXT. RESIDENTIAL STREET - BELVEDERE, OHIO** - **DAY**

**HIGH ANGLE as a rented sedan pulls up to the curb, stops. After a moment Clarice climbs out, a bit stiffly. Double- checking this address, she glances up from a folded street map to -**

**AN OLD, THREE-STORY WOODEN HOUSE**

**in a row of similarly shabby homes, all backing onto a narrow river. A path of boards, laid over mud, leads back along this house towards the brown water. SOUND of hammering from there.**

**CUT TO:**

118.

**EXT. BIMMEL HOUSE - BACK YARD** - **DAY**

**An awesome huddle of pigeon coops sprawls by the brackish water. The birds' COOING mixes with the HAMMERING. A tall, gaunt man in a knit cap is obsessively pounding nails into a new coop.**

**CLARICE**

**approaches him, and the man lowers his hammer. He has red- rimmed eyes of watery blue. His face is deeply seamed.**

**CLARICE**

**Mr. Bimmel...?**

**He stares back at her, warily.**

**CUT TO:**

**INT. BIMMEL HOUSE - STAIRCASE** - **DAY**

**HIGH ANGLE - LOOKING DOWN as Mr. Bimmel leads Clarice up a steep flight of steps. The bannister is worn, sags a bit.**

**MR. BIMMEL**

**I don't know nothin' new to tell ya.**

**The police been back here so many**

**times already... Fredrica went into**

**Columbus on the bus to see about a**

**job. She left the interview OK. She**

**never come home.**

**Clarice pauses, at the landing, to look at a framed photo: the familiar graduation portrait. Others pictures show Fredrica as a young girl, toddler, infant - plump and hopeful at each age.**

**MR. BIMMEL**

(continuing)

**Her room's how she left it. Just shut**

**the door when you're done.**

**CUT TO:**

**INT. FREDRICA'S BEDROOM** - **DAY**

**CLARICE'S POV - MOVING SLOWLY as she takes in flowery chintz curtains... posters of Madonna and Blondie... a twin bed, with worn, stuffed animals on the pillow... . a big sewing machine in the corner.**

119.

**CLARICE**

**turns, absorbing nuances. There is loneliness here, an echo of desperation under this steeply pitches ceiling. A shrill MEOW, and she looks down...**

**A BIG TORTOISESHELL CAT**

**is rubbing against her ankles.**

**CLARICE**

**picks up the cat, scratches behind his ears. She glances up.**

**IN A FULL-LENGTH MIRROR**

**she and the cat stares back at their own reflection...**

**CUT TO:**

**CLARICE**

**sitting at the desk, turns the pages of a high school yearbook. The cat is curled on her lap...**

**CUT TO:**

**CLARICE**

**kneeling by the old Decca record player, flips through LPs and singles. The cat has wandered off...**

**CUT TO:**

**CLARICE**

**pulling a string to light up the closet. She is surprised and intrigued to see an extensive wardrobe, groaning from the rod. A shelf above the rod is stacked high with sewing supplies, in clear plexiboxes. She flips through the hanging clothes, pulls out one dress, on its hanger, for a closer look.**

**THE DRESS**

**is very big, to fit Fredrica, but beautifully cut. Some of the seams still look unfinished. She turns it around, sees a blue tissue dressmaker's pattern still pinned to the back.**


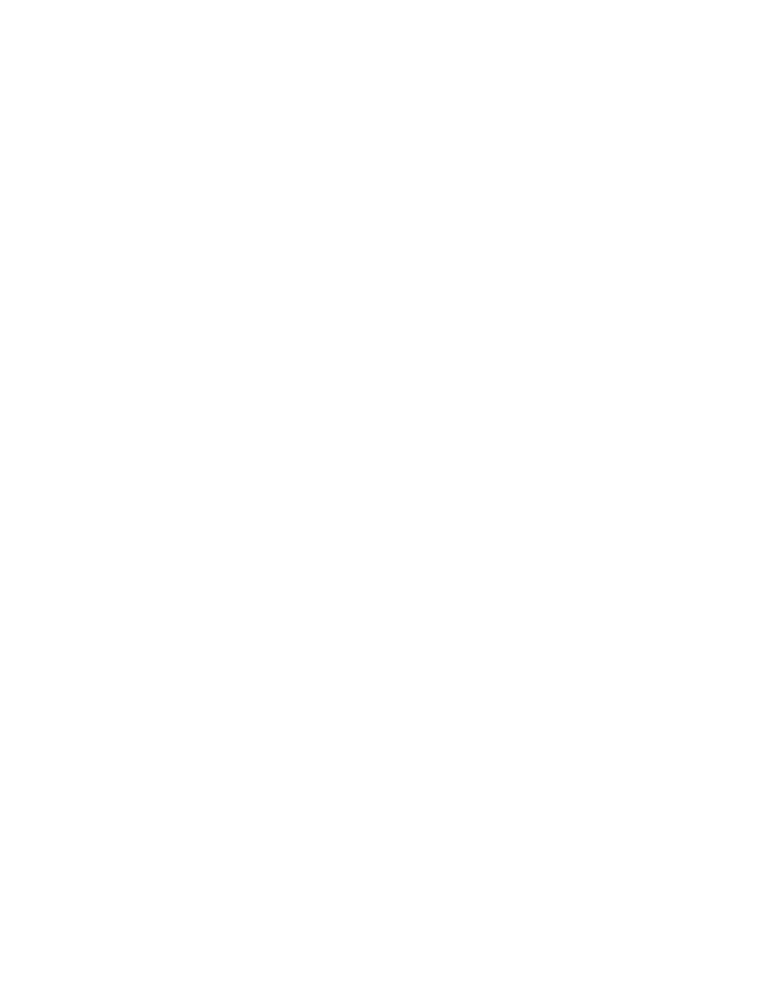


120.

**FAVORING THE SEWING MACHINE**

**as Clarice turns, looks towards it. She hangs the dress on the closet door knob, crosses to sit at the machine. She takes off its dust cover. She runs one hand over the cool metal, as a taunting memory forms in her mind.**

**DR. LECTER** (**V.O.)**

**Billy wants to change, too, Clarice.**

**But there's the problem of his size,**

**you see...**

**She turns, looks again at the unfinished dress. Suddenly she straightens, her attention riveted by something...**

**CLARICE'S POV**

**On the printed pattern, down at the lower back of the outlined dress, are two bold black triangles. We RUSH CLOSER to there shapes, before jumping back to -**

**CLARICE**

**who stares at them, starting to tremble.**

**DR. LECTER** (**V.O.)**

**Even if he were a woman, he'd have to**

**be a big one...**

**IN FLASHBACK**

**those missing triangles of skin on the dead girl's back, in the funeral home in West Virginia...**

**CLOSE ON CLARICE**

**as she jumps to her feet, with a fierce joy.**

**CLARICE**

**Sewing darts. You bastard.**

**CUT TO:**

**INT. BIMMEL PARLOR - DOWNSTAIRS** - **DAY**

**Clarice paces, in an exuberant rush, amidst the worn furniture.**

**CLARICE**

(**into phone)**

**He's making himself a "woman suit,"**

**Mr. Crawford - out of real women!**

(more)


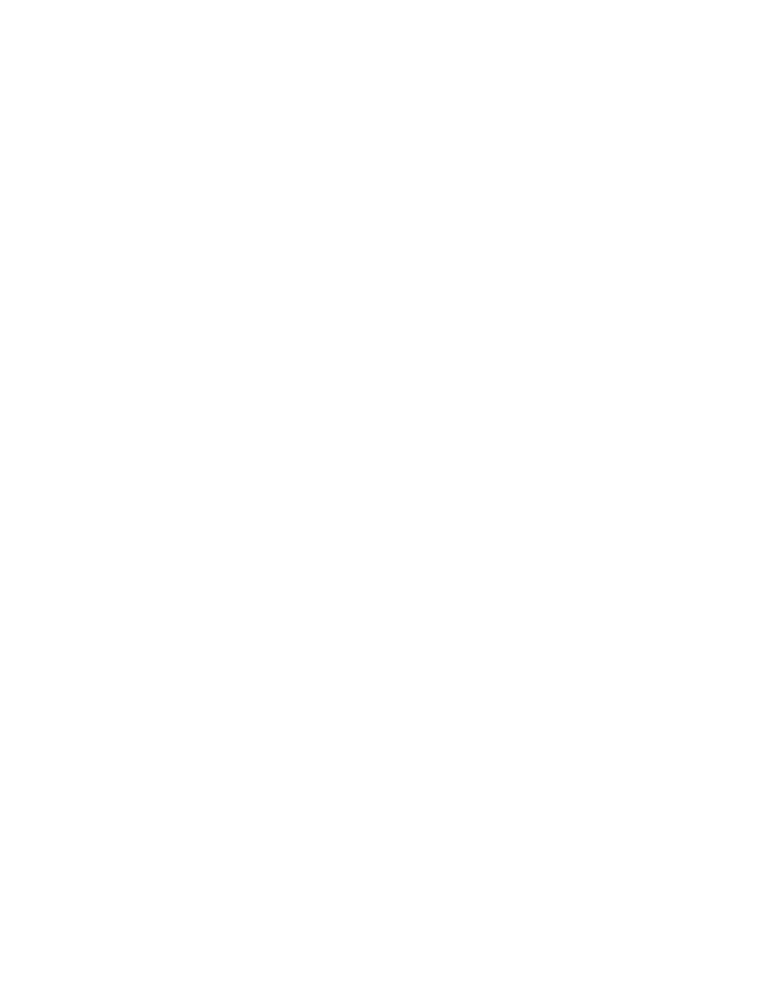


121.

**CLARICE** (cont'd)

**And he can sew, this guy, he's really skilled. A dressmaker, or a tailor -**

**Starling -**

**CRAWFORD** (**V.O.)**

**CLARICE**

**That's why they're all so big - because he needs a lot of skin! He keeps them alive to starve them awhile - to loosen their skin, so that -**

**CRAWFORD** (**V.O.)**

**Starling, we know who he is! And where he is. We're on our way now.**

**Where?**

**CLARICE**

(**pause; surprised)**

**CUT TO:**

**INT. FBI TURBOJET - FLYING** - **DAY**

**Crawford sits at a communications console, with Burroughs, in headphones, by his side. This forward section of the cabin is crammed with hi-tech equipment, all lit up and WHIRRING. Through a window we see clouds, part of the jet's wing.**

**CRAWFORD**

(**into speaker phone)**

**Calumet City, edge of Chicago. I'll be**

**on the ground in 45 minutes with the**

**Hostage Rescue Team. I'm back in**

**charge, Starling. He's mine.**

**INTERCUTTING**

**as Clarice reacts; her happiness for Crawford is tinged with disappointment at being so suddenly out of the hunt.**

**CLARICE**

(**on phone)**

**Sir, that's great news. But how -**

**CRAWFORD**

**Johns Hopkins finally came up with a**

**name for us. We fed him into Known**

**Offenders, and he came up cherries.**

(more)


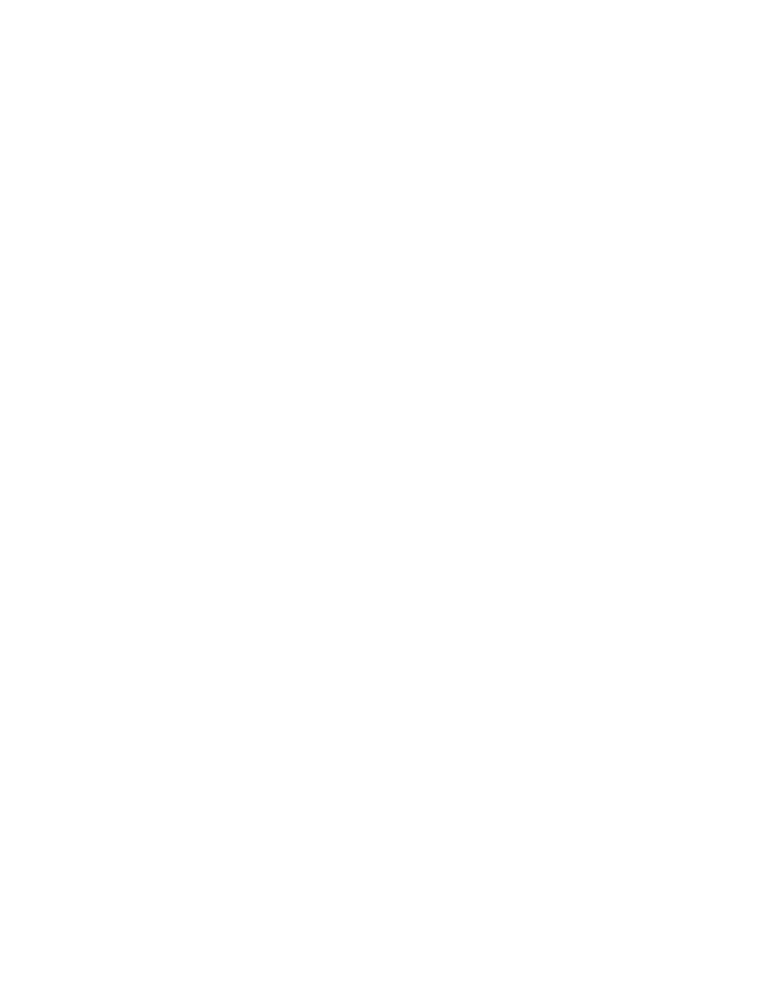


122.

CRAWFORD (cont'd)

(**takes a paper from**

**Burroughs)**

**Subject's name is "Jamie Gumb," AKA**

**"John Grant." Lecter's description was**

**accurate, he just lied about the name.**

**INSIDE THE JET - MOVING ANGLE**

**from the rear of the cabin forward, as we slowly PASS the twelve-man HRT. They're seated in full gear, hardshell armor, quietly checking and rechecking their bulging cases of weapons - silencer automatics, shotguns, stun grenades...**

**CRAWFORD** (**O.S.)**

**This Gumb's a real beauty. Slaughtered**

**both his grandparents when he was**

**twelve, and did nine years in juvenile psychiatric. Where, Starling, he took**

**vocational rehab, and learned a useful**

**trade...**

**INTERCUTTING**

**Sewing...**

**CLARICE**

**CRAWFORD**

**Take a bow. Customs had some paper on his alias. They stopped a carton two years ago at LAX - live caterpillars from Surinam. The addressee was "John Grant." Calumet Power & Light's given us two possible residences under that alias. We're hitting one, Chicago SWAT's taking the other.**

**CLARICE**

(**eagerly)**

**Chicago's only about 400 miles from here. I could be there in -**

**CRAWFORD**

**No, Starling, there isn't time. And you've still got crucial work to do in Ohio. We want him for murder, not kidnapping. I'm counting on you to link him to the Bimmel girl, before he's indicted.**

**Clarice tries hard to swallow her disappointment.**

123.

**CLARICE**

**Yes sir... I'll do my best.**

**CRAWFORD**

(**pause; gently)**

**Starling - you've earned back your**

**place in the Academy. We never**

**would've found him without you, and**

**nobody's ever going to forget that.**

**Least of all me.**

**CLARICE**

**Yes sir. Thank you, sir...**

**CRAWFORD**

**switches off, feeling bad for her. On the console near him, the fax machine starts to CHATTER. He turns, looks.**

**BURROUGHS** (**O.S.)**

**Here he comes, Jack.**

**CLOSE ON**

**an emerging sheet, as Gumb's face is printed out. We see just his hair, then the top of his forehead, before we...**

**CUT TO:**

**EXT. BIMMEL BACK YARD** - **DAY**

**Clarice walks slowly across the yard, absorbing all this news, before suddenly leaping into the air and pumping her fist in triumph, with a happy yelp. Then she sees -**

**MR. BIMMEL**

**staring at her in surprise. He sits by his coops, smoking. CLARICE**

**somewhat embarrassed, crosses over to him.**

**CLARICE**

**Mr. Bimmel... did Fredrica ever**

**mention a man named Jamie Gumb, from**

**Calumet City? Or John Grant?**

(**he shakes his head)**

**Did she know any men that sew?**


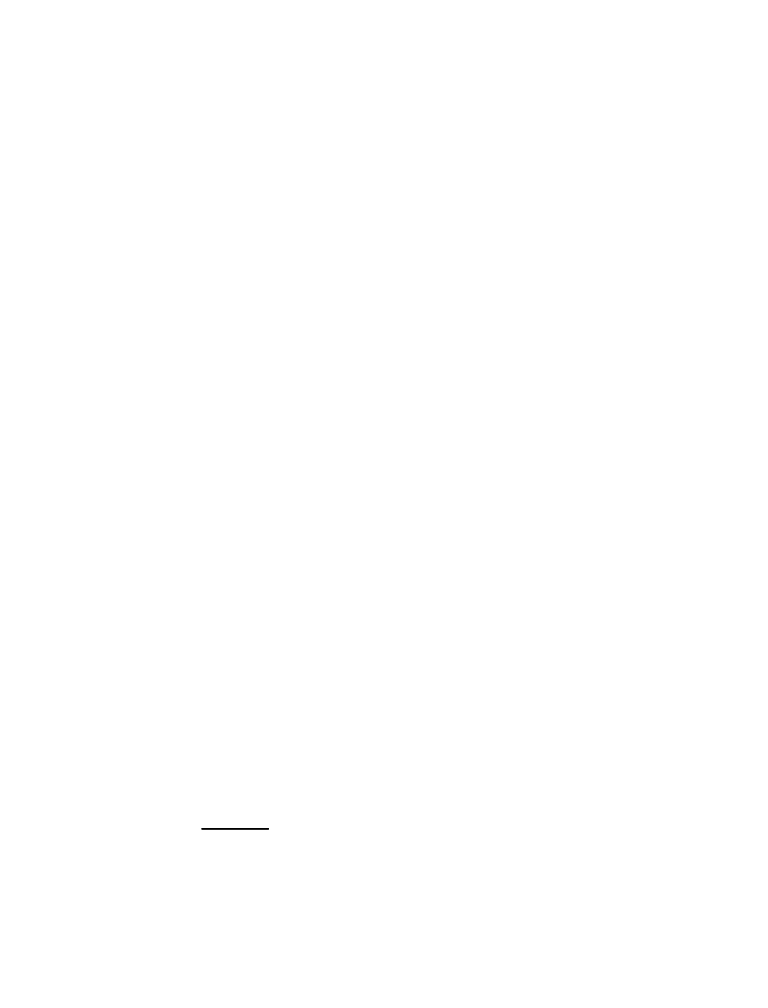


124.

**MR. BIMMEL**

**She sewed for everybody. Stores,**

**ladies, whatever. I don't know about**

**men.**

**CLARICE**

**Who was her best friend, Mr. Bimmel?**

**Who'd she hang out with?**

**CUT TO:**

**EXT. AN ISOLATED RUNWAY - O'HARE AIRPORT** - **DAY**

**The FBI turbojet is parked, its gangway down. Crawford, Burroughs, and the HRT squad, carrying their bags of weapons, CLATTER rapidly down the metal steps...**

**STACY** (**V.O.)**

**Freaked me out. Get your skin peeled**

**off, is that a bummer...?**

**CUT TO:**

**INT. SAVING & LOAN - BELVEDERE** - **DAY**

**STACY HUBKA - short, perky, early 20's - sits nervously at her desk, talking to Clarice, who jots in her notebook. In the background. beyond them, bank tellers, lines of waiting customers, MUZAK.**

**STACY**

**They said she was just rags, like**

**somebody -**

**CLARICE**

**Stacy, did Fredrica ever mention a man**

**named Jamie Gumb? Or John Grant?**

(**Stacy shakes her**

**head)**

**Do you think she could've had a friend**

**you didn't know about?**

**STACY**

**No way. She had a guy, I'da known,**

**believe me. Sewing was her life, she**

**was really great at it. Poor Freddie.**

**CLARICE**

**Did you ever work with her?**


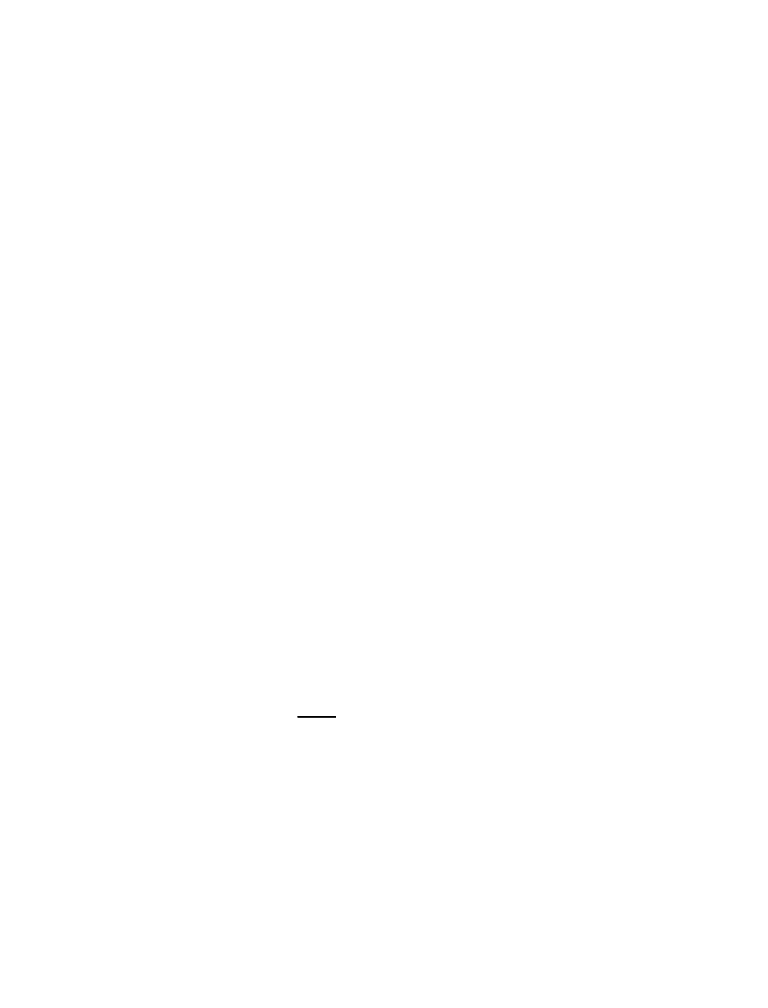


125.

**STACY**

**Oh sure, me'n Pam Malavesi used to**

**help her do alterations for old Mrs.**

**Lippman. Lots of people worked for**

**her, she had the business from all**

**these retail stores? But she was like,**

**totally old, it was more'n she could**

**handle.**

**CLARICE**

**Where does Mrs. Lippman live? I'd like**

**to talk to her.**

**STACY**

**She died. She went to Florida to**

**retire, like two years ago? She dies**

**own there.**

**Clarice reacts, disappointed at the ending of this trail.**

**STACY**

(continuing; **beat;**

**shyly)**

**Is that a pretty good job, FBI agent?**

**CLARICE**

**I think so.**

**STACY**

**You get to travel around and stuff? I**

**mean, better places then this?**

**CLARICE**

**Sometimes you do.**

**STACY**

**Freddie was so happy for me when I got**

**this job. This - toaster giveaways,**

**and Barry Manilow on the speakers all**

**day - she thought this was really hot**

**shit. What did she know, big dummy...**

**Suddenly she's fighting tears. Clarice reaches to hug her.**

**CUT TO:**

**EXT. RESIDENTIAL STREET - CALUMET CITY, ILLINOIS** - **DAY WIDE ANGLE on what appears to be, at first, a calm,**

**ordinary neighborhood of working class two- and three- story houses. But the street is strangely quiet, deserted.**


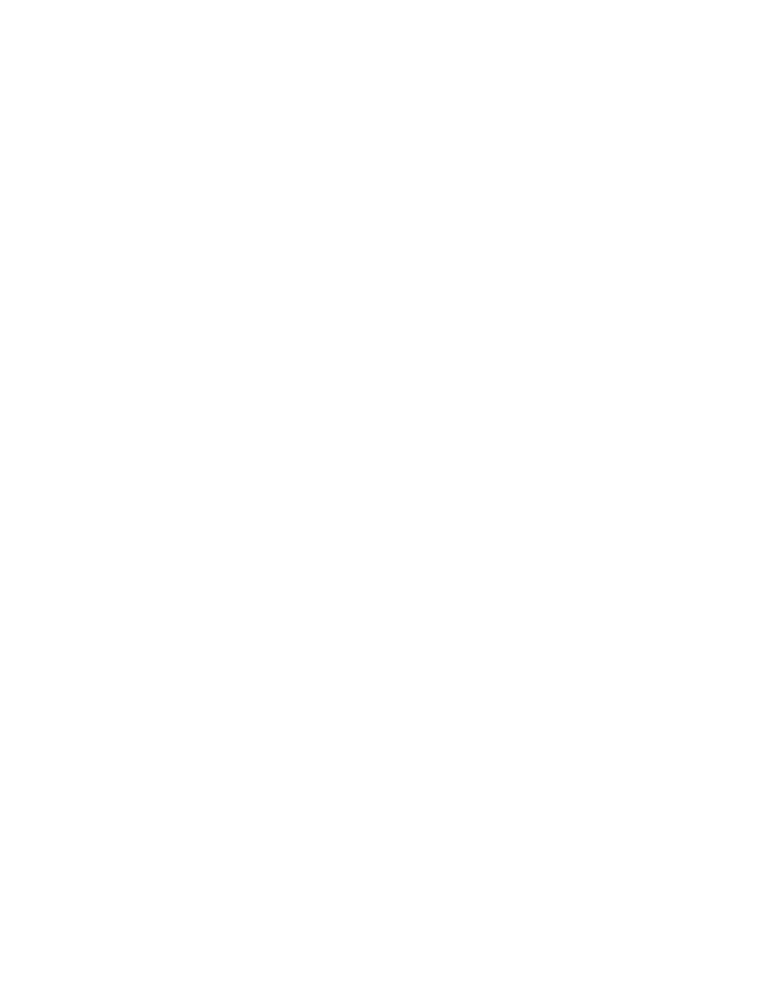


126.

**After a few moments, we become aware of movement - armed, dark-clad figures creeping swiftly and in silence from shrubs to garage corners, from parked cars to porches, appearing and then disappearing...**

**CUT TO:**

**INT. MR. GUMB'S CELLAR - DAY (DIM LIGHT)**

**CLOSE ON Mr. Gumb, as he settles a big pair of infra-red night-vision goggles over his eyes. Moths flutter past his face. His mouth is set in a grim line...**

**CUT TO:**

**EXT. STREET IN CALUMET CITY - FRONT YARD** - **DAY**

**An HRT cop, prone beneath a hedge, is joined by a 2nd HRT Cop, who throws himself to the grass beside him. They both take aim with their scoped rifles at -**

**TELEPHOTO ANGLE (WITH RIFLE CROSSHAIRS)**

**The front door of a big, nearby, split-level house...**

**CUT TO:**

**INT. MR. GUMB'S CELLAR - DAY (DIM LIGHT)**

**CLOSE ON a fuse box, as Mr. Gumb reaches in, flips a switch. The lights go out. SOUND of a second switch, and the cellar is bathed in a green glow...**

**CUT TO:**

**EXT. STREET IN CALUMET CITY - NEIGHBOR'S HOUSE** - **DAY**

**A little boy, riding his tricycle in his driveway, is suddenly startled to find himself staring into the grim face of -**

**A MEMBER OF THE HRT**

**crouched by his garage, armed to the teeth. As the little boy starts to cry, the cop pulls him into the shadows, covering his mouth.**

**CUT TO:**

127.

**INT. MR. GUMB'S CELLAR - DAY (GREEN LIGHT)**

**Mr. Gumb, in his kimono and goggles, creeps silently through his workrooms - knees bent, painted toes places ever so delicately, the Colt held aloft - as more moths flutter past him in the eerie light...**

**CUT TO:**

**EXT. STREET IN CALUMENT CITY** - **DAY**

**A florist's van turns the corner, comes slowly down the street and stops at the curb in front of the split-level. The driver, in a gray deliveryman's uniform and cap, climbs out of the cab, walks briskly to the panel door, on the street side of the van, and slides it open. He leans in, comes out with a long, thin red-ribboned floral box, starts calmly towards the house...**

**CUT TO:**

**INT. MR. GUMB'S CELLAR - DAY (GREEN LIGHT)**

**MR. GUMB'S POV - MOVING ANGLE on the top of the oubliette, a glowing green circle in the dark, as it draws closer and closer... and then Catherine comes INTO VIEW, at the bottom of the pit. She is crouched, exhausted, staring straight up at him - but she can't see him in this infra- red darkness. Precious is curled into her stomach, asleep. The futon is up to Catherine's waist, but there's a clear shot at her head and neck.**

**MR. GUMB**

**Looking down at her, smiles...**

**CUT TO:**

**EXT. STREET IN CALUMET CITY - SUSPECT'S HOUSE** - **DAY MOVING ANGLE on the "deliveryman," seen from behind, as he**

**mounts three steps to the split-level's front porch. Tucked into the small of his back if a 9 mm. automatic.**

**CRAWFORD AND BURROUGHS**

**have slipped out of the van, and are crouched behind it now, with drawn guns, watching tensely as -**

128.

**THE "DELIVERYMAN"**

**settles the floral box in the crook of his left arm,**

**reaches out with his right hand towards the buzzer...**

**CUT TO:**

**INT. MR. GUMB'S CELLAR - DAY (GREEN LIGHT)**

**Slowly, savoring the moment, Mr. Gumb aims the big Colt, which is already cocked, using both hands... He is just about to squeeze the trigger, when we hear his DOOR BUZZER, surprisingly loud and close by. He turns, startled, and sees -**

**A DUSTY BLACK METAL BOX**

**the extension buzzer, mounted high on the wall, which is making the hideous, grating JANGLE. It finally stops, but not before waking Precious, who starts frantically BARKING, off screen., as -**

**MR. GUMB**

**raises his gun again, spinning back towards -**

**HIS POV - THE PIT BOTTOM**

**where Catherine, hearing but still not seeing him, quickly yanks the futon over both herself and the dog. Instantly the two of them become one squirming, indistinguishable mass.**

**MR. GUMB**

**bites his lip, his aim wavering, as he can't decide where to safely place his shot. The maddening BUZZER sounds again, even more insistently, and he cries out with frustration and fury. But as the BUZZER continues, he reluctantly uncocks his gun, looking up angrily towards his front door...**

**CUT TO:**

**INT. MR. GUMB'S FRONT DOOR** - **DAY**

**The door opens, on a chain, and Clarice peers in, smiling.**

**CLARICE**

**Good afternoon... I wonder if you**

**could help me. I'm looking for Mrs.**

**Lippman's family?**

129.

**Mr. Gumb frowns out at Clarice. For the first time ever, we get a well-lit view of his bland, pale-eyed moon of a face.**

**MR. GUMB**

**They don't live here anymore.**

**CUT TO:**

**EXT. FRONT DOOR OF SUSPECT'S HOUSE - CALUMET CITY**

**The "deliveryman" yanks a 12 lb. sledgehammer from the floral box, swings it with all his might against the door knob, blowing it through as -**

**MOVING ANGLE**

**Crawford and Burroughs race towards the door, guns up...**

**CUT TO:**

**EXT. MR. GUMB'S FRONT DOOR** - **DAY**

**Mr. Gumb starts to close the door, only to have Clarice push back against it, politely but firmly. She holds up her ID.**

**CLARICE**

**Excuse me, but I really do need to**

**talk to you. This was Mrs. Lippman's**

**house. Did you know her?**

**MR. GUMB**

(**beat)**

**Just briefly. What's the problem,**

**Officer?**

**CUT TO:**

**INT. SUSPECT'S HOUSE - CALUMENT CITY** - **DAY**

**A bedroom window disintegrates as a flash grenade is shot through it, EXPLODING on the floor. An instant later, a black-clad HRT cop dives through the shattered glass, rolls across the floor, comes up on one knee swivelling his sawed-off shotgun...**

**CUT TO:**

**EXT. MR. GUMB'S FRONT DOOR** - **DAY**

**Clarice and Mr. Gumb, still eyeing each other through the door crack...**

130.

**CLARICE**

**I'm investigating the death of**

**Fredrica Bimmel. Who are you, please?**

**MR. GUMB**

**Jack Gordon.**

**CLARICE**

**Mr. Gordon, did you know Fredrica when**

**she worked for Mrs. Lippman?**

**MR. GUMB**

**No. Wait... Was she a great, far**

**person? I may have seen her, I'm not**

**sure...**

**CUT TO:**

**INT. SUSPECT'S HOUSE - CALUMET CITY** - **DAY**

**MOVING ANGLE as Burroughs moves quickly down a hallway and enters the living room, where Crawford is standing, with his gun held down by his side, surrounded by several other cops. Burroughs shakes his head: Nothing here...**

**CUT TO:**

**INT. MR. GUMB'S FRONT HALLWAY** - **DAY**

**Mr. Gumb glances briefly over his shoulder, towards his kitchen, then turns back to Clarice with a smile.**

**MR. GUMB**

**Mrs. Lippman had a son, maybe he could**

**help you. I have his card somewhere.**

**Do you mind stepping inside, while I**

**looks for it?**

**Thanks.**

**CLARICE**

**ANGLE FAVORING THE COLT PYTHON**

**which rests on a counter, just inside the open kitchen doorway. THROUGH this doorway, we watch as Mr. Gumb, at the end of his front hall, slips the chain. Clarice enters, closing the door behind her.**

**CUT TO:**

131.

**EXT. FRONT YARD OF SUSPECT'S HOUSE - CALUMET CITY** - **DAY MOVING ANGLE - towards the front door, as frustrated HRT**

**cops file out of the empty house, rifles slung across their shoulders.**

**WE PICK OUT CRAWFORD**

**walking across the grass towards the van, when all at once he stops in his tracks, shaken by a sudden flash of intuition.**

**CAMERA RUSHES VERY CLOSE**

**on his stricken face...**

**Clarice.**

**CRAWFORD**

**CUT TO:**

**INT. MR. GUMB'S PARLOR** - **DAY**

**Clarice, pulling her notebook from her shoulder bag, glances around the musty-looking room.**

**MR. GUMB** (O.S.)

**That horrible business, I shiver every**

**time I think about it...**

**Overstuffed furniture, porcelain figurines. One archway onto the front hall, another onto a dining alcove, and through there, the kitchen. Mr. Gumb is crossing to a rolling desk, raising the top. He bends over, begins poking through cubby holes. His tone is casual, neutral.**

**MR. GUMB**

**Are they close to catching somebody,**

**so you think?**

**CLARICE**

**I think we may be, yes.**

**Mr. Gumb stiffens, almost imperceptibly. His back is to her, as he continues opening drawers, rustling papers.**

**CLARICE**

(continuing)

**Mr. Gordon, did you take over this**

**place after Mrs. Lippman died?**

132.

**MR. GUMB**

**Yes. I bought the house from her, two**

**years ago.**

**CLARICE**

**Did she leave any records here? Tax or**

**business records? Maybe a list of**

**employees?**

**CLOSE ON MR. GUMB'S BACK**

**as he continues his rummaging.**

**MR. GUMB**

**No, nothing at all. Has the FBI**

**learned something? Because the police**

**here don't seem to have the first**

**clue...**

**Out of the folds of his kimono crawls a Death's-head Moth. It creeps slowly to the center of his back, raising its wings.**

**MR. GUMB**

(continuing)

**Do you have his description yet, or**

**some fingerprints...?**

**CLARICE**

**unaware, is still glancing around the room. For several agonizing moments, we think she won't see the moth - but then she turns, does see it, and her eyes freeze. A beat of pure fear. A tremendous struggle to keep her voice calm.**

**CLARICE**

**No... no, we don't.**

**Very carefully, she drops her notebook back into her bag, lowers the bag to the floor. With her fingertips she brushes back the edge of her blazer, loosening its drape.**

**MR. GUMB**

**turns back towards her cheerfully, holding out a business card.**

**MR. GUMB**

**Ahhh. Here's that number.**

**CLARICE**

**keeps her distance. They are about ten feet apart.**


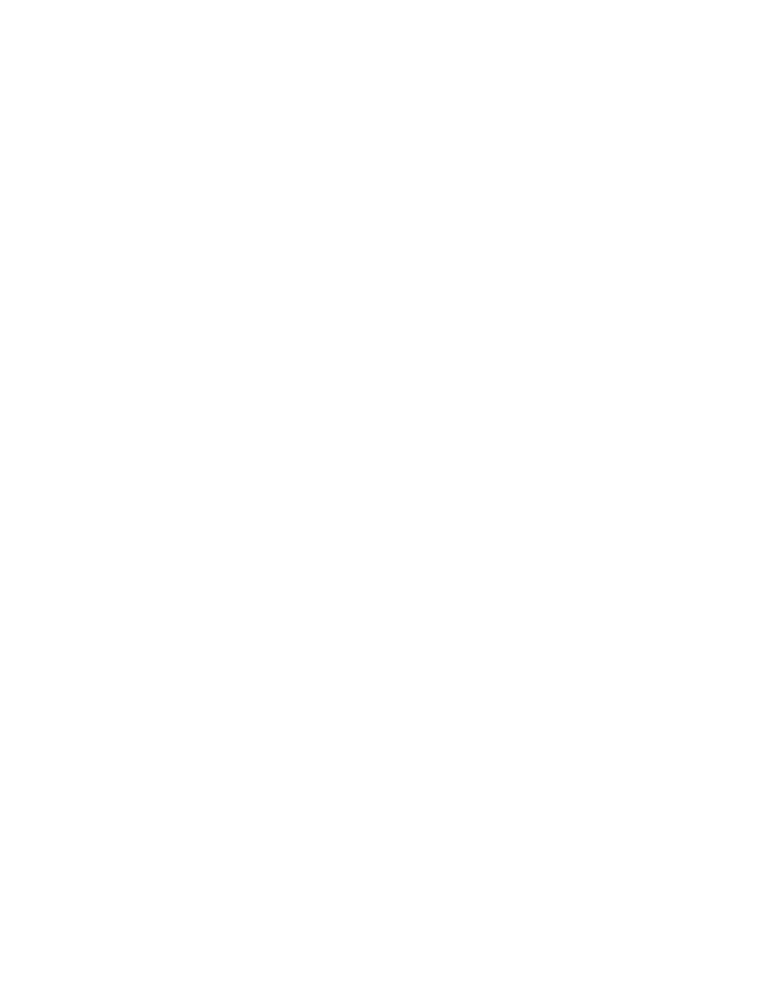


133.

**CLARICE**

**Good, thank you. Mr. Gordon, do you**

**have a phone I can use?**

**MR. GUMB**

**is about to reply when the moth suddenly flies up from behind him, flutters past his face. He turns, looking at it. He looks back at Clarice, his mouth still open.**

**HER EYES**

**are unmoving, locked on his.**

**HIS EYES**

**stare back at her, widen. And they know each other.**

**MR. GUMB**

(**softly)**

**In the kitchen. I'll show you.**

**CLARICE**

**whips her gun out, gripping it in both shaking hands.**

**Freeze!**

**CLARICE**

**MR. GUMB**

**slowly tilts his head to one side, smiles at her. CLARICE**

**tries to force more authority into her voice.**

**CLARICE**

**Okay... Okay, Mr. Gumb, you're under**

**arrest. Down on the floor, hands and**

**legs spread, move it.**

**MR. GUMB**

**turns, then all at once, in two quick steps, he is gone, disappearing into his dining alcove, then kitchen.**

**CLARICE**

**hesitates, just a split second, to shoot him in the back - and then it's too late.**


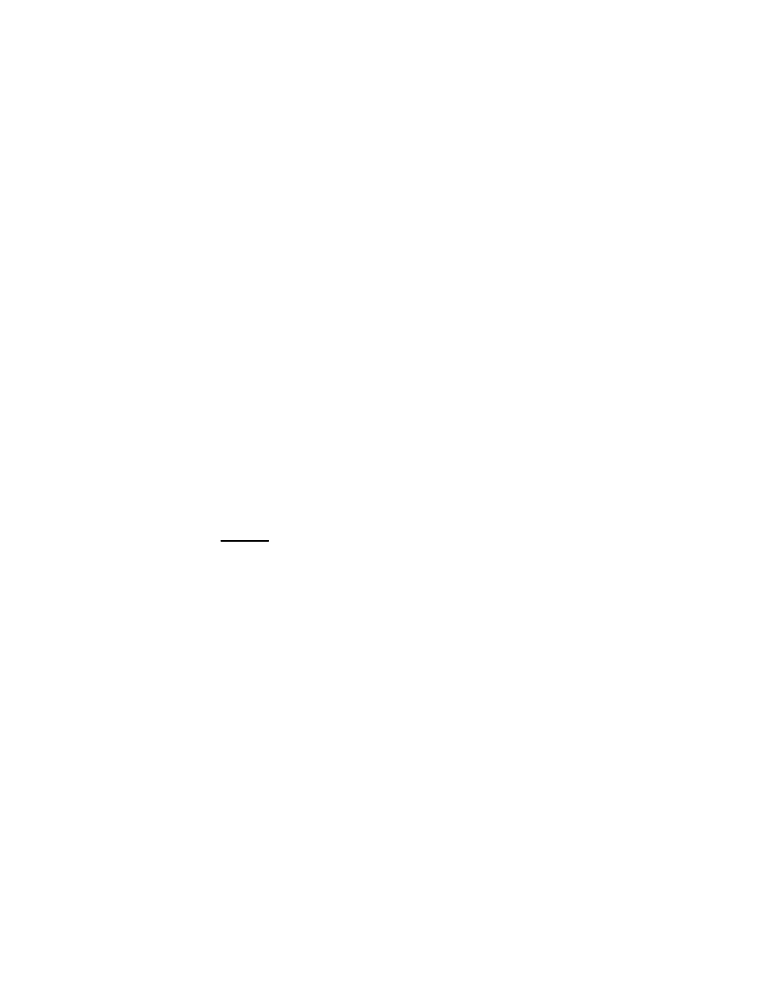


134.

**Shit!**

**CLARICE**

**CUT TO:**

**INT. MR. GUMB'S KITCHEN** - **DAY**

**Clarice hurries inside, moving low, swivelling her gun. HER POV - MOVING**

**The kitchen is empty. To one side, a door still shuddering on its hinges...**

**CLARICE**

**rushes to this - pauses - then elbows the door aside, aiming her gun down -**

**AN EMPTY STAIRWELL**

**brightly lit, leading to the cellar. Two doors facing the bottom, both open. No sign of Mr. Gumb.**

**CLARICE**

**hates this, hates this, which door, it's a trap, what to do: she is very scared, but suddenly hears -**

**The distant SCREAM of Catherine Martin, somewhere down there in that killing maze.**

**CLARICE**

**rushes through the doorway, and down the stairs.**

**BEHIND HER, ON THE KITCHEN COUNTER**

**there's an empty space; the Colt Python is gone.**

**CUT TO:**

**INT. MR. GUMB'S CELLAR** - **DAY**

**MOVING ANGLE - WITH CLARICE - hurrying down the steps. More SCREAMS; they seem to be coming from the left door. Clarice goes that way, entering a brick-walled passage - pipes over-head, naked bulbs. The lighting, though dim, is incandescent; Mr. Gumb has switched off his infra-red system. Clarice comes to a T-shaped intersection, stops. Another SCREAM, again to her left, and the BARKING of a dog...**


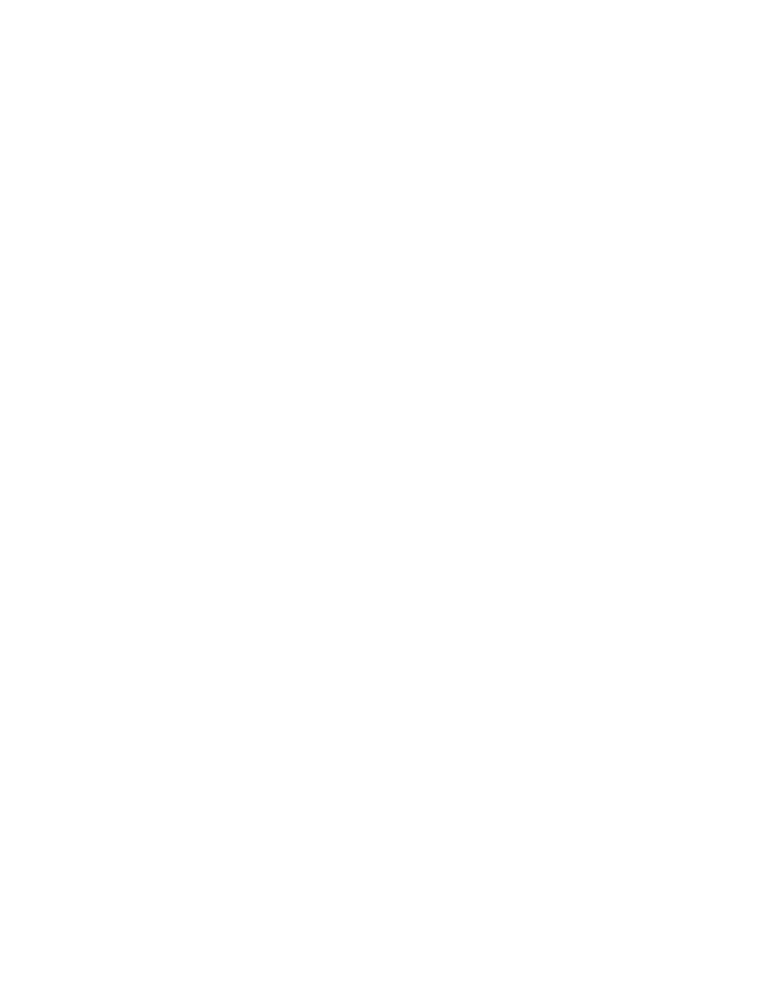


135.

**CLARICE**

**follows her gun around the corner, looking right.**

**EMPTY PASSAGEWAY**

**but doors opening off it - he could be lurking behind any of them. She looks left... sees an opening onto some kind of chamber. The noises are LOUDER, coming from there.**

**CLARICE**

**moves cautiously towards this chamber...**

**CUT TO:**

**INT. OUBLIETTE CHAMBER - DAY (DIMLY LIT)**

**Clarice moves in, hugging the wall, gun swivelling...**

**HER POV - MOVING**

**the open top of the pit... beyond it, the other two doorways, opening onto this room - Jesus, he could come through either one of them, or come up behind her... She moves to the pit, looks down, very briefly, sees Catherine SCREAMING, hysterical, and a little white dog BARKING...**

**CLARICE**

**kneels, staring up from one door to another, she can't cover them all, she's totally exposed - and what's a dog doing there?**

**CLARICE**

**FBI, Catherine, you're safe.**

**CATHERINE**

**Safe, SHIT, he's got a gun! Getmeout.**

**GET ME OUT!**

**CLARICE**

**You're all right! Where is he?**

**CATHERINE**

**Get me out!**

**CLARICE**

**I'll get you out! Just be quiet so I**

**can hear. Shut that dog up.**

(**still swivelling)**

**Is there a ladder? Is there a rope?**

136.

**CATHERINE**

**I don't know! get me out!!**

**CLARICE**

**Catherine. Listen to me. I have to**

**find a rope. I have to leave this**

**room, just for a minute, but -**

**CATHERINE**

**NOOOOO! You fucking bitch don't you**

**LEAVE ME down here, DON'T YOU-**

**CLARICE**

**Shut UP!**

(**then, louder)**

**The other officers will be here any**

**minute! you're perfectly safe now!**

**Ignoring Catherine, whose shouts turn to sobs, she backs away, turns, picks one of the other doorways, moves into it quickly.**

**CUT TO:**

**INT. NEW PASSAGEWAY - DAY (DIMLY LIT)**

**CLARICE'S POV - MOVING down this passageway, towards a new room... pausing at the doorway, straining to hear... no sound except Catherine's CRYING, not in the background., and Clarice's own RAPID BREATHING. Then she crouches - LOWER ANGLE - bursts forward, through the doorframe, sidestepping...**

**CUT TO:**

**INT. WORKROOM - DAY (DIMLY LIT)**

**Clarice weaves back and forth, half-crouched, gun out, back to the wall. Her face glistens with sweat, as she takes in...**

**HER POV - MOVING NERVOUSLY**

**Mr. Gumb's sewing machine... his swivel chair... the old Victrola... Big moths are crashing into the light bulbs, overhead; they're everywhere. Suddenly, from just behind her, a CLICK and a HUM, and -**

**CLARICE**

**spins, almost shoots, before seeing -**

137.

**A SMALL REFRIGERATOR**

**with its thermostat just switching ON.**

**CLARICE**

**gasps for breath, fighting for calm. She turns again, slashing her free hand at the moths, moving quickly on...**

**CUT TO:**

**INT. SKINNING ROOM - DAY (DIMLY LIT)**

**Clarice moves past the mannequins, all of them naked now... then quickly past the huge Chinese armoire, ready to shoot into it. Its doors yawn open; it is empty except for several padded hangers... She moves on, past the big sink, with its DRIPPING faucet... the counter, with its gleaming knives... the rows of chemical jars. At the end of this room is**

**A CLOSED DOOR**

**Clarice starts to open it, then hesitates. Looking around, she seizes a wooden chair, wedges it under the door know, sealing off this section of the cellar. With her back thus defended, she turns, softly retracing her steps.**

**CUT TO:**

**INT. WORKROOM - DAY (DIMLY LIT)**

**Passing again through the workroom, Clarice pauses, seeing a half-curtained door, to one side, that she had previously skirted. She crosses to the door, listens and hears no sound inside, takes a deep breath and reaches for the knob. She twists it, and, as it turns, shoves hard and follows her gun inside, all in one quick move...**

**CUT TO:**

**INT. BATHROOM - DAY (BRIGHTLY LIT)**

**An old-fashioned bathroom: tiled floor, sink, toilet - and a big, free-standing tub. An opaque shower curtain, suspended from an oval ring, hides whatever might be inside.**

**CLARICE**

**centers her gun on the curtain, at chest height, and yanks it aside with her left hand. No one standing there. Something lower down catches her eye.**


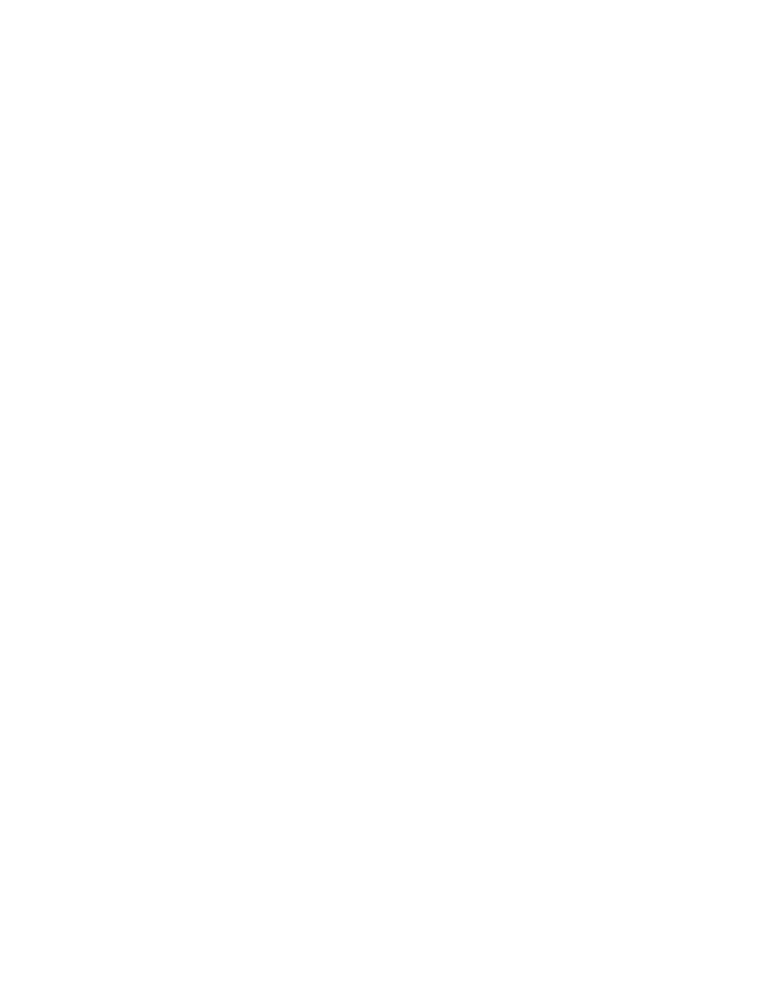


138.

**She leans in, stares more closely, not understanding, at first, that she's seeing -**

**A FEMALE HAND AND WRIST**

**sticking up from the tub, which is filled with hard red- purple plaster. The hand is dark and shrivelled, with pink nail polish and a dainty wristwatch. As -**

**CLARICE**

**is reacting with horror to this sight, the lights go out, to be replaced, a split-second later, by the eerie green glow of Mr. Gumb's infra-red system. Clarice cries out, turns blindly, reaching for the door, can't find it, free hand clawing desperately into what is, for her, utter darkness. SOUND of Catherine KEENING again, in the far distance. Clarice stumbles, goes to her knees, rights herself, finally clutches the door frame...**

**CUT TO:**

**INT. MR. GUMB'S WORKROOM - DAY (GREEN LIGHT)**

**Clarice emerges from the bathroom in a half-crouch, arms out, both hands on the gun, extended just below the level of her unseeing eyes. She stops, listens. In her raw- nerved darkness, every SOUND is unnaturally magnified - the HUM of the refridgerator... the TRICKLE of water... her own terrified BREATHING, and Catherine's faraway, echoing SOBS... Moths smack against her face and arms. She eases forward, then stops again, listens... She eases forward again, following her gun, and creeps directly in front of, and then past -**

**MR. GUMB**

**who has flattened himself against a wall, arms spread like a high priest, Colt in one hand. He wears his goggles and kimono, and under that - draping down over his naked arms, like some hideous mantle - his terrifying, half-completed suit of human skins. This is an exquisite moment for**

**him - a ritual of supreme exhaltation. He smiles at Clarice as, completely unaware, she moves beyond him, exposing her back. Very slowly and quietly he steps out behind her, taking his gun in both hands, aiming...**

**CLOSE ON**

**the Colt Python as - in SLOW MOTION - his thumbs cock the hammer, the SOUND registering as a LOUD METALLIC CLICK, and -**


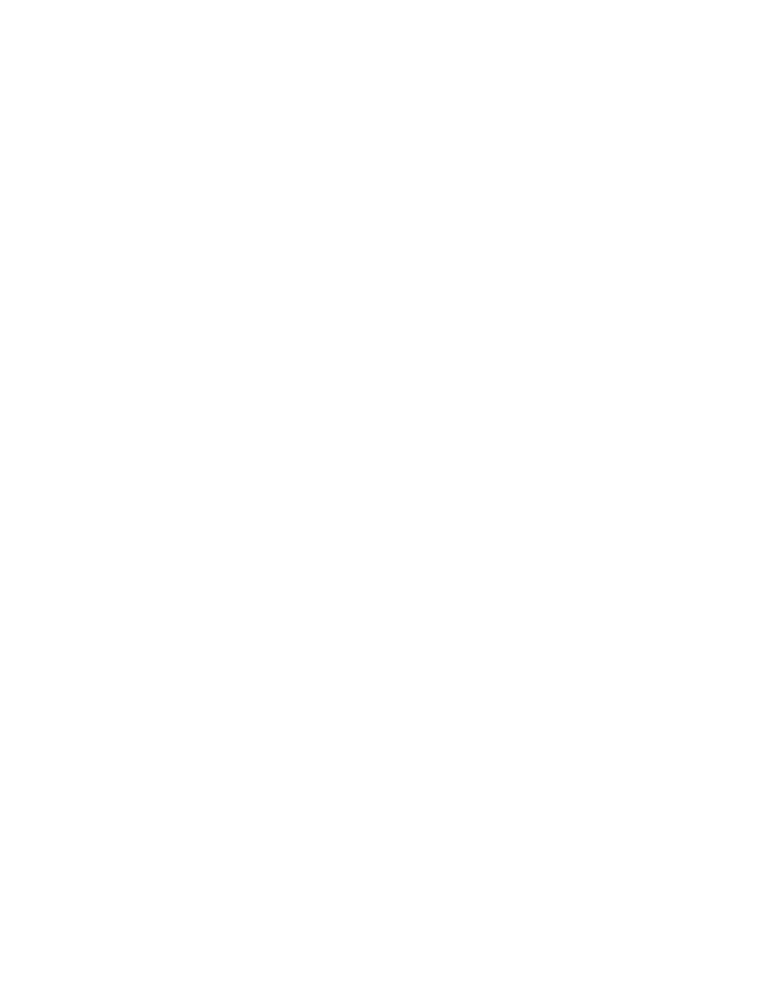


139.

**CLARICE**

**spins, still in SLOW MOTION, flame already leaping from her gun muzzle, as we see -**

**THE TWO FIGURES**

**almost at point-black range, guns ROARING hugely, one FLASH from Mr. Gumb, and onetwothreefour FLASHES from Clarice, overlapping his, and then, as the ECHOES crash deafeningly -**

**CLOSE ONCLARICE - LOW ANGLE -**

**with NORMAL SPEED RESTORED, as the side of her face hits the floor, and she is gasping, stunned by the noise and flames; there is blood on her check, and an ugly powder burn, but she ignores them, twisting to yank her speedloader from her jacket pocket, locking it blindly onto her gun's cylinder, reloading, right in front of her face, then rolling onto her stomach, aiming her gun upward again, blinking her dazzled eyes, straining to locate him in the darkness... Where is he, where...? Then, as the ECHOES finally fade, she hears something else - a tortured, sucking, WHISTLE from perhaps eight feet away...**

**MOVING ANGLE - WITH CLARICE**

**as she crawls forward, on her elbows, following her gun, until it bumps against Mr. Gumb's shoulder. He is lying on his back, chest a bloody mess. She slides her muzzle against his head, hard, but he doesn't move; another shot isn't needed. He stares upwards, through his goggles, bloody lips working. He tries to speak, but cannot. One hand reaches slowly upwards, the fingers twitching, as if to seize something, overhead... Then a final, ghastly groan, his hand drops, he is head. Clarice feels for a pulse at his neck, making sure. Then, and only then, does she permit herself to roll over, collapsing onto her back beside him.**

**OVERHEAD ANGLE**

**down at the two faces - intimately close together, like lovers on their pillow. Then, as we PULL SLOWLY AWAY, we see that her staring eyes, and his dead gaze, are both locked onto -**

140.

**A DEATH'S-HEAD MOTH -**

**perched on an infra-red bulb, overhead, its wings pumping slowly. SOUND UPCUT - wailing SIRENS, many excited VOICES, as we...**

**DISSOLVE TO:**

**EXT. MR. GUMB'S HOUSE** - **DUSK**

**The front porch of the tall Victorian house is bathed in a glare of TV lights, police and ambulance flashers. Cars and vans and even a firetruck choke the street; cops, reporters, EMS workers and curious civilians swarm around the ineffective barricades. The BUZZ of their voices goes even higher as**

**CLARICE**

**dazed, her face bandaged - comes out of the house, walking protectively beside Catherine, who is wheeled on a gurney. They are followed out by uniformed cops, then two firemen with an extension ladder. Catherine, blinking in confusion, is still clutching the little dog, and refuses to give her up even as she's trundled into an ambulance. Clarice sways with exhaustion; everyone seems to be shouting at her at once, pulling her sleeve. She tries to fight free of them, desperate for a familiar face.**

**AN OHIO HIGHWAY PATROL CAR**

**pulls up, stops, and Crawford climbs out of the back seat. He makes his way anxiously through the press of bodies, stopping when he sees Clarice.**

**THEY LOOK AT ONE ANOTHER**

**for a long moment, Crawford choked with pride for her, with sorrow for her ordeal, with love, but unable to find any words. And then he does.**

**CRAWFORD**

**Starling... your father sees you.**

**And then all at once she is sobbing, her knees giving way, but he is there to catch her, he is hugging her fiercely. HOLD ON them for a long beat.**

141.

**DIRECTOR BURKE** (**V.O.)**

(**over loudspeaker)**

**Congratulations! You are now officers**

**of the Federal Bureau of**

**Investigation...**

**DISSOLVE TO:**

**EXT. GROUNDS OF THE FBI ACADEMY - WEEKS LATER** - **DAY**

**The forty members of Clarice's class, resplendent in their best dark suits and dresses, rise, cheering themselves, then turn happily to wave to their audience, as APPLAUSE mounts. Beyond them, on a gaily tented platform, the Director stands behind his podium.**

**CLARICE AND ARDELIA**

**look at one another solemnly. Ardelia holds up both fists, in a power shake, and Clarice taps them with her own. She is radiantly beautiful in a navy dress and pearls, the thin scar on her cheek almost healed. Ardelia turns, waving towards the crowd, the Clarice's thoughts are elsewhere. She turns, searching among the dignitaries on the platform, till she locates**

**CRAWFORD**

**who smiles back at her with quiet pride, and offers a little salute.**

**CLARICE**

**grins - more happy than we've ever seen her - then turns to wave towards the crowd with the others.**

**MOVING ANGLE**

**over the admiring sea of spectators, several hundred of them, still rising from their folding chairs, APPLAUDING in celebration of these special young people, this perfect, sunlit day. SOUND UPCUT - rock music, laughter - as we...**

**DISSOLVE TO:**

**INT. ACADEMY DORM - REC ROOM - THAT NIGHT**

**A LOUD party is underway - food, beer, dancing - as the new grads celebrate ferociously. Ardelia weaves her way through the crowded room, reaches Clarice, who is flanked by her special guests - Pilcher and Roden, the two ardent scientists. Ardelia has to shout at Clarice over the din.**


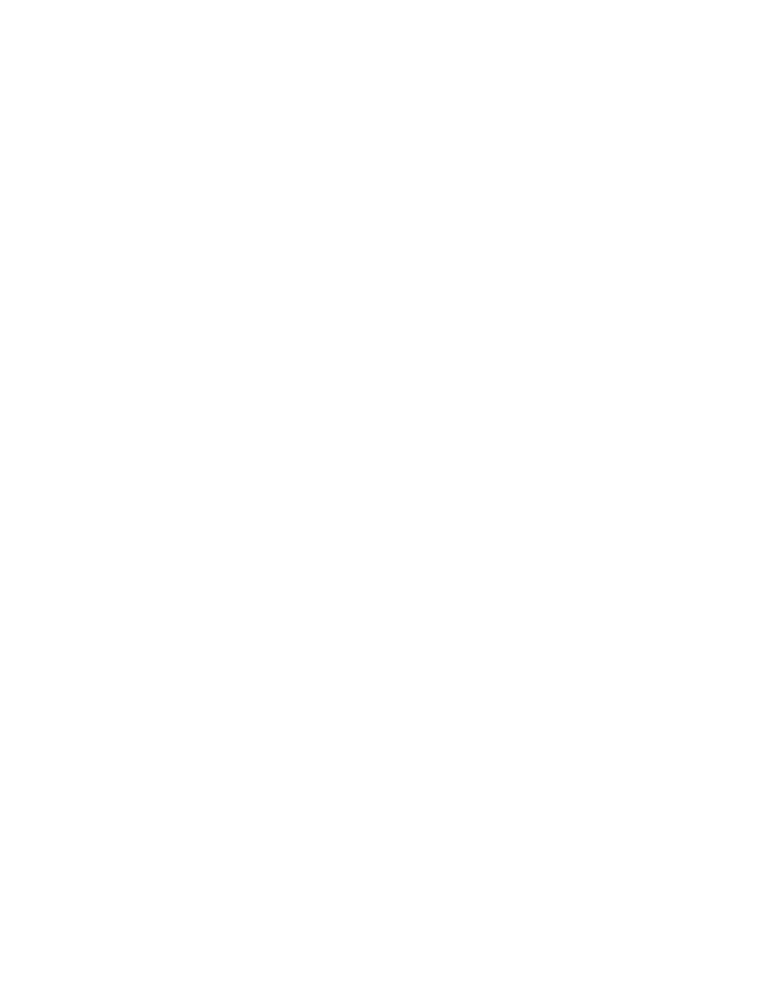


142.

**ARDELIA**

**Agent Starling! Telephone!**

**CLARICE**

(**surprised)**

**Agent Mapp! Thank you!**

**She nods to Pilcher, leaves them. Roden, who is quite happily drunk, grabs the startled Ardelia around the waist.**

**RODEN**

**Hel-lo, gorgeous! Let's get down.**

**Ardelia looks at Pilcher, confused.**

**PILCHER**

**Just ignore him. He's not a Ph.D.**

**CUT TO:**

**INT. DORM HALLWAY** - **NIGHT**

**Clarice picks up the dangling pay phone, speaks happily.**

**Starling.**

**CLARICE**

**DR. LECTER** (**V.O.)**

**Well, Clarice, have the lambs stopped screaming...?**

**She freezes, stunned by the familiar voice. Then she turns, waving frantically towards**

**ARDELIA**

**who is just inside the rec room door, at the end of the hall, lost in conversation with Pilcher and Roden. Ardelia glances at her briefly but misunderstands, waves cheerfully back.**

**DR. LECTER** (**V.O.)**

**Don't bother with a trace, I won't be**

**on long enough.**

**CLARICE**

**turns back, gripping the phone more tightly.**

**CLARICE**

**Where are you, Dr. Lecter?**

**CUT TO:**

143.

**EXT. A CLEAR NIGHT SKY**

**Very beautiful, glittering with countless stars.**

**DR. LECTER** (**O.S.)**

**Where I have a view, Clarice...**

**MOVING DOWN**

**we see a rolling lawn, a curving bay. Boats ride at anchor, lights shimmering...**

**DR. LECTER** (**O.S.)**

**Orion is looking splendid tonight, and Arcturus, the Herdsman, with his**

**flock...**

**DR. LECTER**

**smiles into his mobile phone. He is stretched out on a lounger, on a tiled patio, languidly paring an orange with a penknife. His appearance is quite altered - a beard, glasses, lighter hair. He's has some cosmetic surgery, as well.**

**DR. LECTER**

(**into phone)**

**Your lambs are still for now, Clarice,**

**but not forever... You'll have to earn**

**it again and again, this blessed**

**silence. Because it's the plight that**

**drives you, and the plight will never**

**end.**

**CLARICE**

**Dr. Lecter -**

**DR. LECTER**

**I have no plans to call on you,**

**Clarice, the world being more**

**interesting with you in it. Be sure**

**you extend me the same courtesy.**

**CLARICE** (**V.O.)**

**You know I can't make that promise.**

**DR. LECTER**

**Goodbye, Clarice...**

(**and then, softly)**

**You looked - so very lovely today, in**

**your blue suit.**

**CUT TO:**

144.

**INT. DORM HALLWAY** - **NIGHT**

**As Clarice reacts, the fill weight of his words sinking in.**

**CLARICE**

**Dr. Lecter... Dr. Lecter...!**

**But only a DIAL TONE comes from the phone. She is still staring at her receiver, in shock, as we -**

**CUT BACK TO:**

**EXT. THE MOONLIT PATIO**

**Dr. Lecter sighs, sets his phone down, then rises. Popping an orange section into his mouth, he turns towards the brightly lit house. Stepping delicately over the sprawled body of a uniformed security guard, he walks in through open french doors.**

**CUT TO:**

**INT. A BOOKLINED STUDY**

**In a swivel chair, amidst the wreckage of his papers and books, is the writhing figure of Dr. Frederick Chilton. The extreme intricacy of his bindings recalls Dr. Lecter's own former restraints. His screams are muffled by the tape over his mouth; he stares at Dr. Lecter like a rabbit trapped in headlights.**

**DR. LECTER**

**Considers him for a genial moment, then raises the little pen-knife. His eyes are twinkling.**

**DR. LECTER**

**Well, Dr. Chilton. Shall we begin?**

**FADE OUT**

**THE END**
