# Supplementary material
Source: ML conference proceedings conference paper supplement (https://openreview.net/forum?id=Sxi6gBtJcI)
Supplement: supplementary_material [file The_Green_Mile-screenplay.doc]

THE GREEN MILE

Screenplay by

Frank Darabont

from the novel by

Stephen King

First Draft

11/4/97

We each owe a death, there are no exceptions...

A SONG BEGINS, distant as a faded memory on an old Victrola:

Once I built a railroad, made it run... Made it race against

time...Once I built a railroad, now it's done...Brother, can

you spare a dime...

Opening credit sequence

plays against footage of the Great Depression, images

haunting and sepia-toned, defining an era. The bread

lines...the soup kitchens...the dust bowl refugees heading

west with their possessions on their backs and no hope in

their eyes...the strutting gangster royalty flaunting their

bootleg riches...an entire generation of lost youth riding

the rials...the U.S. army troops raining truncheon blows on

the half-starved and forgotten veterans of World War One as

"Hooverville" is set afire in the very shadow of the nation's

capitol...

All these faces, all these lives, in a world not really so

very long ago...

EXT. FIELD - DAY(SLOW MOTION)

...where cattails sway in the sepia-toned heat. A small scrap

of fabric is snagged in the nettles, fluttering languidly...

COLOR BLEEDS SLOWLY IN as mosquitoes swarm and dragonflies

skitter, showing the fabric scrap to be pale yellow...

Suddenly, a MAN WITH A SHOTGUN comes crashing through the

cattails, wiping through frame and exiting...

...then ANOTHER MAN...and ANOTHER...armed with rifles,

plowing through the brush, exiting frame...

...and now comes KLAUS DETTERICK, a farmer one step above

shirt-tail poor, a double-barrel shotgun in the crook of his

arm. He pauses, horrified, seeing the scrap of cloth. He

pulls it loose, turns back, screaming something in anguish...

...and still more men come crashing into view, flooding by us

with dreamlike, slow-motion grace. ONE MAN is leading a team

of DOGS, trying to untangle the leads. DEPUTY ROB McGEE is

shouting for everybody to stay together...

...and under it all, we hear a sibilant, frightening whisper:

WHISPERING VOICE (V.O.)

You love your sister? You make any

noise, know what happens?

And off that horrible voice, we

CUT TO:

INT. GEORGIA PINES NURSING HOME - MORNING(PRESENT DAY)

A CLOCK RADIO spews the morning weather report, abruptly

pulling us into the present with a prediction of rain. PAUL

EDGECOMB, late 70's/early 80's, wakes to another day...

INT. PAUL'S ROOM - MORNING

Paul stands at his bathroom mirror, meticulously buttoning

his shirt. He picks up a hairbrush, starts tidying his hair...

INT. CORRIDOR - MORNING

THE OLD AND INFIRM haunt these corridors like ghosts. A WOMAN

inches along on a walker. A MAN shuffles by with a rolling

I.V. stand. The floor is a limey, institutional green.

Paul comes into view, spry for his age, murmurs an occasional

greeting.

INT. BREAKFAST ROOM - MORNING

DOZENS OF RETIREES are having breakfast, sipping weak coffee

or tea. Some chat and gossip, other are content to keep their

own company, some just stare slackly into space.

Paul enters, sees ELAINE CONNELLY sitting with a few other

ladies, sipping tea. She's 80, refined and elegant, his best

friend here. She gives him a good-morning smile. He gives her

a rakish wink in return, which makes her smiles all the more.

Paul reaches past the people at the counter and sneaks two

pieces of cold leftover toast off a serving plate. He tosses

Elaine another look--catch ya later--and exits.

INT. HALLWAY PAST KITCHEN - MORNING

Paul slips to the back door unnoticed. Identical red plastic

rain ponchos line the wall on pegs. He helps himself to one

and eases outside, making good his escape.

EXT. NURSING HOME - ESTABLISHING - MORNING

Nestled in a valley of wooded hills, a drizzly mist rolling

over the treetops.

Paul appears f.g., coming up the ridge in his borrowed

poncho. He looks back at the valley below, inhales deeply--

this is a man who loves his walks.

He pulls a piece of toast from his pocket and starts to

nibble as he presses up on the ridge...

Low angle: nursing home and ridge beyond

...and we see Paul from a distance, just a speck trudging up

toward the treeline. A PICKUP TRUCK rumbles into frame and

parks, a bumper sticker looming large: "I Have Seen God and

His Name Is Newt Gingrich".

BRAD DOLAN gets out, an orderly in his late 20's/early 30's,

arriving for work in jeans and cheesy plaid shirt. He gazes

up toward the ridge, scowling and muttering softly:

BRAD

Old fuck.

He slams the door and heads for the nursing home...

EXT. WOODS - MORNING

...as CAMERA BOOMS DOWN through the trees to find Paul

wandering a wooded path, munching a tidbit of toast, looking

for all the world like Red Riding Hood in his plastic poncho.

It's silent here, like a church. The only sounds we hear are

the twittering of the birds and the hammering of the

woodpecker.

A RUSTLING SOUND makes Paul freeze. He turns, becomes

transfixed. Softly:

PAUL

Oh, my...

Reverse angle

reveals a magnificent BUCK, not twenty feet away, misty

breath punching the cold morning air. They watch each other

for an endless moment, both standing stock still...

...and then the animal bounds away, vanishing into the

foliage. Paul lets out a breath, shakes his head in wonder.

He takes another bite of toast, moves on...

...and WE PAN WITH HIM to reveal a pair of old wooden storage

shacks along the path up ahead.

INT. SHACK - MORNING

Dark in here, cobwebby and decrepit. We see Paul approaching

outside the grimy window. He steps up to the glass and shades

his eyes, peering curiously in as we

DISSOLVE TO:

EXT. NURSING HOME - DAY

Paul approaches the back door, returning from his walk. He

reaches for the knob...and a figure in white lunges from

behind the dumpster to grab his wrist. He whirls, gasping in

fright--it's Brad Dolan, wearing his orderly's uniform.

BRAD

Out for a little stroll, Paulie?

PAUL

Let go...

Paul tries to pull away, but Dolan's got him tight.

BRAD

What's with this poncho you got

on, huh? This isn't yours.

PAUL

I got it off the wall there.

There's a whole row of them.

BRAD

But not for you, Paulie, that's

the thing. Those are for the staff.

PAUL

I just borrowed it. Don't see what

harm it does.

BRAD

It's not about harm, it's about

rules. You probably don't think an

old fart like you has to mind

rules anymore, but that's just not

true.

Brad's eyes keep shifting--he obviously doesn't mind abusing

the elderly as long as he doesn't get caught doing it.

PAUL

I'm sorry if I broke the rules.

BRAD

You got no business up in those

woods anyway, especially in the

rain. What if you fall and bust a

hip, huh? Who you think's gonna

have to hoss your sorry old bacon

back down here? Me, that's who.

PAUL

You're hurting me!

BRAD

What do you do up there, anyway?

You're too old to go jerk off, so

what do you do?

PAUL

Nothing. I just walk, that's all,

I like to walk!

Brad lashes out and grabs Paul's other hand, which he's been

holding tightly clenched shut.

BRAD

Come on. Open up. Let Poppa see.

Paul uncurls his fingers, revealing the crushed remnants of

a bit of toast, his palm slick with a greasy oleo smear.

ELAINE (O.S.)

Paul?

They turn. Elaine stands just inside the screen door with a

cup of tea. Brad's eyes become calculated, wondering how much

she's seen. Elaine keeps her tone level, betraying nothing:

ELAINE

I saw you coming back, thought

you'd like some tea.

(beat)

Are you coming in?

PAUL

Mr. Dolan and I were...chatting.

About the weather. I think we're

through now.

Brad lets Paul loose, leans close:

BRAD

Paulie? You tell anyone I squeezed

your po' ol' hand, I'll tell 'em

you're having senile delusions.

Who you think they'll believe?

Brad walks off. Paul turns, watches him go. The screen door

opens and Elaine steps out, her face pale. Paul gives her a

strained, though grateful, smile as we

CUT TO:

INT. TV ROOM - DAY

Jerry Springer's on the tube, whipping his studio audience

into a frenzy. PAN OFF TO REVEAL DOZENS OF OLD FOLKS watching

on couches and folding chairs. An old black fellow named PETE

is grousing to a GROUP OF ELDERLY LADIES...

PETE

Why we always watch this crap?

ELDERLY LADY #1

It's interesting.

PETE

Interesting? Bunch'a inbred

trailer trash, all they ever talk

about is fucking...

...and WE CONTINUE PANNING to Paul and Elaine sitting near

the back, talking quietly as Paul rubs his bruised hand:

ELAINE

We should report him.

PAUL

That might just provoke him all

the more, make things worse for

everybody.

ELAINE

It's not everybody he has it in

for, Paul. It's you.

(off his look)

What did you do to provoke him in

the first place? Nothing. He's

just an abusive bully, and should

be made to stop.

PAUL

Ellie, please...

Pete

is at the TV, switching channels while:

ELDERLY LADIES

...no, the Movie Classic channel

is further down...past the Home

Shopping...keep going...

He finds the Movie Classic channel, which is playing an old

black and white musical--"Top Hat," with Fred Astaire and

Ginger Rogers. A delighted reaction:

ELDERLY LADY #2

Oh! This is wonderful...

Paul

idly shifts his gaze to the TV...and his expression goes

slack with recognition and dismay. Elaine sees the look in

his eyes.

He glances away...even briefly considers walking out...but in

the end, he can't help himself. The past just caught up with

him with a freight-train wallop, and, for one, he decides to

ride the rails...

He looks back at the TV. On screen, Fred and Ginger have

begun their famous "Cheek to Cheek" number, with Astaire

singing in that sublime, easy-go-lucky way of his:

FRED ASTAIRE

Heaven, I'm in heaven...and my

heart beat so that I can hardly

speak...

SLOW PUSH IN on Paul, watching. He'd like to take his eyes

off the screen, but the movie has him in a grip tighter than

Brad Dolan's. Elaine is watching him with puzzled concern:

ELAINE

Paul? What is it?

No response. All he can hear is that music, all he can see

are those dancers. The figures on TV are gliding with

ghostlike grace in their silvery, phosphor-dot world of long

ago...

Paul abruptly bursts into tears.

The room goes quiet, everything comes to a standstill. All

eyes turn, some concerned, others merely curious. Paul just

sits sobbing into his hands, shoulders heaving.

ELAINE

Paul...my God...

ORDERLY

(rushing over)

What is it? What's wrong?

PAUL

It's okay...I'll be okay...

Another orderly appears--Brad Dolan. He puts his hand on

Paul's shoulder and leans close, feigning concern.

BRAD

S'matter, Paulie? Why the boo-hoo-

hoo? Something nasty happen?

Elaine shoves his hand away, eyes flashing with anger.

ELAINE

Mr. Edgecomb will be perfectly

fine without your help, thank you.

Brad back off with a "hey, suit yourself" gesture. Elaine

helps Paul to his feet and leads him out.

CUT TO:

INT. SUN ROOM - DAY

Paul is staring out the windows, pensive and drained. It's

raining now, pattering the glass and the lawn beyond. Elaine

waits across from him, wishing he would speak. Softly:

PAUL

I guess sometimes the past just

catches up with you, whether you

want it to or not. It's silly.

ELAINE

Was it the film?

(off his look)

It was, wasn't it?

PAUL

I haven't spoken of these things

in a long time, Ellie. Over sixty

years.

She reaches out, gently takes his hand.

ELAINE

Paul. I'm your friend.

PAUL

Yes. Yes you are.

Paul wonders if he's even up to talking about it after all

this time...and decides that perhaps he is:

PAUL

I ever tell you I was a prison

guard during the depression?

ELAINE

You've mentioned it.

PAUL

Did I mention I was in charge of

death row? That I supervised all

the executions?

This does come as a surprise. She shakes her head.

PAUL

They usually call death row the

Last Mile, but we called ours the

Green Mile, because the floor was

the color of faded limes. We had

the electric chair then. Old

Sparky, we called it.

(beat)

I've lived a lot of years, Ellie,

but 1935 takes the prize. That was

the year I had the worst urinary

infection of my life. That was

also the year of John Coffey, and

the two dead girls...

FADE TO BLACK

In blackness, a title card appears:

"The Two Dead Girls"

CUT TO:

EXT. GEORGIA COUNTRYSIDE - DAY (1935)

HUNDREDS OF PRISONERS work the fields, pickaxes rising and

falling in waves, a prison song being sung in cadence with

the work. GUARDS patrol on horseback, rifles aimed at the sky.

A late 20's Ford PRISON TRUCK comes chugging into view along

the road, kicking up a long trail of dust in the heat. It

seems to be riding unusually low on its rear suspension.

EXT. COLD MOUNTAIN PENITENTIARY - ESTABLISHING - DAY

A Depression-era prison in the south. The prison truck sways

down the rutted dirt road toward the main gate...

INT. E BLOCK TOILET - DAY

...while Paul Edgecomb, early 40's, stands in a cramped

toilet in his guard's uniform, trying to piss. His face is

pained, his forehead beaded with sweat.

INT. E BLOCK (THE GREEN MILE) - DAY

BRUTUS HOWELL(nicknamed "Brutal" for his intimidating size,

but he's actually rather thoughtful by nature) stands at the

entry door of the cellblock, peering out through a viewing

slot. He sees the prison truck arrive at the main gate.

He turns and nods to fellow guard DEAN STANTON sitting at the

duty desk, then cross the Green Mile--a wide corridor of

faded green linoleum running some sixty paces top to bottom,

with four large cells to a side.

Brutal steps to the bathroom, listen a moment, knocks softly.

BRUTAL

Paul? Prisoner.

PAUL (O.S.)

Christ. Gimme a minute.

Brutal waits patiently, a bit embarrassed. He finally hears

a THIN TRICKLE, accompanied by a stifled groan of pain.

BRUTAL

You all right in there?

PAUL (O.S.)

For a man pissing razor blades.

The door opens, revealing Paul's pale and sweaty face.

BRUTAL

You should'a took the day off,

gone to see the doctor.

PAUL

With a new arrival? You know

better. Besides, it's not as bad

as it was. I think it's clearing

up.

They hear the truck HONKING as it rumbles up outside. Paul

gives them a nod to resume their positions. Paul walks down

the Mile, passing the cells where two inmates reside--the

first is ARLEN BITTERBUCK, a Washita Cherokee; the second is

EDUARD DELACROIX("DEL"), a skinny Cajun.

DEL

New boy coming in, boss?

PAUL

Never you mind, Del, you just keep

your nose quietly on your business.

Paul arrives at the end of the Mile, takes up a position at

an empty cell. (Down at this end, past the cells, is E

Block's version of the "hole" -- a padded room where violent

inmates are sent to cool off. It isn't used very often...in

fact, at the moment, it's doubling as storage space.)

Brutal

peers out the viewing slot as the truck stops outside.

BRUTAL

Damn, they're riding on the axle.

What'd they do, bust the springs?

GUARDS PERCY WETMORE AND HARRY TERWILLIGER OF E BLOCK emerge

from the back of the truck and step down, turn back...

Tighter angle on back of truck

We get our first glimpse of the new inmate as a pair of

GIGANTIC BLACK FEET step down into the yard...and the rear of

the truck bounces back up on its springs where it belongs.

Brutal

sees what's coming, eyes widening slightly.

BRUTAL

Paul? You might wanna reconsider

getting in the cell with this guy?

PAUL

Why's that?

BRUTAL

He's enormous.

PAUL

Can't be bigger than you.

Brutal tosses him a look--just wait. He swings the door open

in a hot flood of daylight, giving us our first good look at:

John coffey

is a huge black man, nearly 7 feet tall and 300 pounds, his

massive head shiny and bald, his skin a tapestry of old

scars, his prison overalls (the biggest size they had) ending

at mid-calf. He looks dull and confused, as if wondering

where he is and how he got there. Percy and Harry lead him

toward E Block in shackles. Percy's got his hickory baton out

of it custom-made holster, hollering:

PERCY

Dead man walking! Dead man walking

here!

Inside the cellblock

Paul can't see them approach from where he stands, but he can

certainly hear Percy:

PAUL

Jeezus, pleeze-us, what the hell's

he yelling about?

Up by the door, Brutal just rolls his eyes. Percy is the

first one through the door, still hollering...

PERCY

Dead man walking!

...then Coffey enters, ducking low to get through, his shadow

blotting out Brutal and Dean as his massive frame fills the

door. Everything hangs suspended for a moment, a look of

"hold shit" written on everybody's faces. Percy keeps yanking

on the big man's cuffs, leading him along with a cry of:

PERCY

Dead man walking! Dead man--

PAUL

Percy, that's enough.

Percy falls reproachfully silent. Paul doesn't dignify it,

just motions for them to come on. The procession comes down

the Mile, with Brutal and Dean bringing up rear.

BRUTAL

You sure you wanna be in there

with him?

PAUL

(looks to Coffey)

Am I gonna have trouble with you,

big boy?

Coffey shakes his head slowly. Paul takes the clipboard

transfer papers from Harry, turns and enters the cell.

Coffey just stands outside the cell and waits, as if he

doesn't understand the concept. Paul motions him to come on

in. Coffey starts to comply, but Percy raps him smartly with

the tip of his hickory baton to get him moving faster.

Coffey flinches, enters the cell. Paul stares angrily at

Percy, who stands slapping his hickory baton against the palm

of his hand like a man with a toy he's itching to use.

PAUL

Percy. They're moving house over

in the infirmary. Why don't you go

see if they could use some help?

PERCY

They got all the men they need.

PAUL

Why don't you just go make sure?

(off his look)

I don't care where you go, Percy,

as long as it's not here at this

very moment.

Percy flushes red, the baton hovering near his palm. He looks

like he's about to say something, but thinks better of it and

stalks angrily up the Mile instead...

...and sees Del at his bars, smiling. Infuriated, Percy

swings his baton and smashes Del's fingers with a LOUD CRACK.

Del jerks back, howling in pain:

DEL

OWW, GOD, HE BUS' MY FINGERS!

PERCY

Wiped that grin off your shitpoke

face, didn't I

PAUL

Goddamn it, Percy! Get the hell

off my block!

Percy throws Paul a look of disdain--your block, huh? He

swaggers out. Del's on his knees, weeping from the pain:

DEL

Oww, damn, boss, he done bus' my

fingers for true...

PAUL

We'll get it looked at, Del, now

keep yourself quiet like I said!

Del falls silent, moaning over his hand. Paul turns to

Coffey, who looks unsettled by all the commotion.

PAUL

If I let Harry take those chains

off you, you gonna be nice?

Coffey nods. Harry enters to remove Coffey's shackles.

PAUL

Your name is John Coffey.

COFFEY

(deep and quiet)

Yes, sir, boss, like the drink,

only not spelt the same.

PAUL

So you can spell, can you?

Coffey shakes his head. Harry steps out.

PAUL

My name is Paul Edgecomb. If I'm

not here, you can ask for Mr.

Terwilliger, Mr. Howell, or Mr.

Stanton...those gentlemen there.

(beat)

This isn't like the rest of the

prison. It's a quiet place, we

like to keep it that way.

Coffey considers this carefully, puzzled.

COFFEY

It weren't me making all the

noise, boss.

PAUL

(eyes narrowing)

You having a joke on me, John

Coffey?

COFFEY

No, sir.

Paul sees he isn't joking, continues:

PAUL

Your time here can be easy or

hard, depends on you. If you

behave, you get to walk in the

exercise yard every day.

We might even play some music on

the radio from time to time.

Questions?

Coffey doesn't miss a beat, as if he's been waiting to ask:

COFFEY

Do you leave a light on after

bedtime?

Paul blinks. It's the last thing he expected. Coffey smiles

uneasily, as if they might think him foolish for asking.

COFFEY

Because I get a little scared in

the dark sometimes. If it's a

strange place.

Paul looks to his men. The guards are trading glances.

PAUL

It's pretty bright in here all

night long. We keep half the

lights burning in the corridor.

COFFEY

Cor'der.

Coffey looks confused. Paul points to the lights lining the

ceiling of the Green Mile in wire mesh cages.

PAUL

Right out there.

Coffey nods, relieved. Then he surprises everybody by

offering Paul his hand, as if to show proper manners. Paul

hesitates, oddly touched, then surprised his men even more by

accepting. Coffey's hand swallows his. Coffey shakes gently,

lets go.

Paul steps from the cell. Brutal slides the door shut, locks

it. Coffey stands a moment as if unsure what to do, then

sinks onto the cot with his hands clasped between his knees.

He looks up at Paul, his voice soft as a whisper:

COFFEY

Couldn't help it, boss. I tried to

take it back, but it was too late.

Paul turns, leads his men up the Mile...

PAUL'S INNER OFFICE

...and they enter a few moments later. Paul is furious, but

keeping a lid on his temper:

PAUL

Dean, run Delacroix up to the

infirmary and see if his fingers

are broken.

BRUTAL

Course they're broken, I heard the

damn bones crack. Goddamn Percy.

HARRY

You hear what he was yelling when

we brought the big dummy in?

PAUL

How could I miss it, Harry? The

whole prison heard.

This makes Brutal snort, breaking the tension--the others

can't help smiling.

BRUTAL

You'll probably have to answer for

sending him off the Mile. He's

gonna cause you trouble over this,

you mark me.

PAUL

I'll chew that food when I have

to. Right now I wanna hear about

the new inmate...aside from how

big he is, okay?

BRUTAL

(smiles)

Monstrous big. Damn.

PAUL

Seems meek enough. Looks like they

sent us an imbecile to execute.

HARRY

Imbecile or not, he deserves to

fry for what he done. Here...

Harry tosses a pair of manila envelopes bound with rubber

bands on the desk before Paul--Coffey's file.

HARRY

...make your blood curdle.

CUT TO:

EXT. E BLOCK PRISON YARD - DAY

A small are reserved for inmates of the Mile, fenced-off from

the main prison yard. Arlen Bitterbuck walks the perimeter

under the watchful eyes of guard BILL DODGE.

We find Paul sitting by himself on the bleachers with

Coffey's file on his knees, thoughtfully unwrapping his brown-

bagged sandwich. PUSH SLOWLY IN as he begins to read...

EXT. DETTERICK FARM - DAWN (FLASHBACK)

...and we see Klaus Detterick walk from his house to the barn

with a milking pail, a solitary figure against a brightening

horizon. He disappears into the barn...

...and we hold for a long moment, the house silent

b.g.,chickens clucking and scratching in the front yard...

...until a WOMAN'S SCREAM shatters the silence. Klaus

reappears, dropping the pail, running toward the house...

PAUL ON BLEACHERS

...as Paul turns the page, keeps reading...

INT. DETTERICK HOUSE - DAWN (FLASHBACK)

...and Klaus bursts in to find his wife MARJORIE absolutely

frantic with terror:

KLAUS

WHAT? GOD SAKES, WHAT?

MARJORIE

THE GIRLS! THE GIRLS ARE GONE!

She drags him through the house to a screened-off porch area

where their 12 year old son HOWIE is pointing and shouting--

HOWIE

Papa! Papa, look! The blood!

--and Klaus freezes there, stunned to see blood spattered on

the floor and the screen door hanging off its hinges...

KLAUS

Oh my God.

PAUL ON BLEACHERS

...as Paul absently takes another bite of his sandwich, not

really tasting it, keeps reading...

INT. DETTERICK HOUSE - DAWN (FLASHBACK)

...plunging us back into the screaming chaos: Klaus grabbing

up shotgun shells, Howie loading the .22 rifle he got for

Christmas, Marjorie sobbing incoherently...

KLAUS

GODDAMN IT, WOMAN, GET ON THE

PHONE NOW! YOU TELL 'EM WE HEADED

WEST! MIND WHAT I'M SAYING! WEST,

Y'HEAR?

...and she goes stumbling through the house, grabbing for the

phone as her men disappear toward the porch b.g.:

MARJORIE

Central! Central, are you on the

line? Oh, God, please, somebody

took my little girls...

OUTSIDE THE HOUSE

Klaus and his son race from the house, following spatters of

blood across the yard...

PAUL ON THE BLEACHERS

...as Paul lets out a long breath, turns the page...

EXT. COUNTRY ROAD/FIELD - DAY (FLASHBACK)

---and we see CARS AND TRUCKS pulling up, MEN jumping out

with rifles, pouring down the incline toward the field where

Klaus is hollering and waving his arms. Deputy McGee comes

sliding down from the road, taking charge at the top of his

lungs--

McGEE

I WANT ALL THE WEAPONS UNLOADED,

Y'HEAR? TAKE OUT YOUR SHELLS, I

WON'T HAVE A MAN SHOT BY ACCIDENT

TODAY! BOBO, WHERE THEM DOGS?

--and the dogs come bounding out of the back of a truck,

howling down the incline to lead the chase...

VARIOUS ANGLES

...which takes us through the cattails and bulrushes...to the

spot where Klaus finds the little scrap of pale yellow

fabric, turns and screams...

KLAUS

Oh, Lord, this belongs to my

Katie...

...and they keep going, stopping abruptly as they find: A

blood-drenched area of tramped grass. A little girl's bloody

nightgown hangs in the low branches of a tree. Some of these

strong men look like they might throw up or faint at the

sight of it. Their blood freezes in their veins as an INHUMAN

HOWLING commences up ahead. It's like nothing they've ever

heard before, raising the hackles of men and dogs alike.

PAUL ON BLEACHERS

...as Paul quietly turns another page, shaking his head...

PAUL

Jesus.

EXT. FIELD - DAY (FLASHBACK)

The men reload their weapons. Everybody's terrified. McGee

starts off, the other following his lead toward--

THE RIVER

--where they emerge from the treeline, drawing ever closer to

the source of that INHUMAN HOWLING...

...and they stop, gazing in horror:

John Coffey sits on the riverbank in bloody overalls, his

huge feet splayed out before him. He's making that inhuman

howling sound, face twisted in monstrous grief, pausing

occasionally to take in a great hitching breath of air.

Curled in his massive arms are the naked bodies of

Detterick's 9 year-old twin girls, their once-blonde hair now

matted to their heads with blood.

A tableau. The men staring. John Coffey howling. A train

puffing smoke across the landscape.

Klaus Detterick breaks the moment, lunging down the riverbank

in a headlong rush. The others try to grab him, but he shrugs

them off and throws himself on Coffey with a scream of

inarticulate rage, kicking and punching, fists flying. Coffey

barely seems to notice.

The others catch up with Klaus, drag him off. He falls to his

knees on the riverbank, sobbing into his hands. Howie runs to

him, throws himself into his father's arm. They hug each

other tightly, overwhelmed with grief.

A semblance of quiet descends, except for Coffey's

heartbroken wailing. A ring of rifle toting men forms around

him, though he hardly seems aware of it. McGee steps forward,

uncertain:

McGEE

Mister.

Coffey goes quiet at once, eyes still streaming tears.

McGEE

Mister? Can you hear me?

(Coffey nods)

You have a name?

COFFEY

John Coffey. Like the drink, only

not spelt the same.

McGee hunkers carefully down, watching for any sudden moves.

McGEE

What happened here, John Coffey?

You want to tell me that?

COFFEY

I couldn't help it. I tried to

take it back, but it was too late.

McGEE

(pause)

Boy, you are under arrest for

murder.

McGee spits in Coffey's face...

PAUL ON BLEACHERS

...as Paul looks up with a slight start, jarred from his

reading to find WARDEN HAL MOORES standing before him.

HAL

I interrupt?

PAUL

I'm just about done.

Paul stows the file as Hal settles onto the bleachers.

PAUL

How's that pretty gal of yours?

HAL

Melinda's not so well, Paul. Not

so well at all. Got laid up with

another headache yesterday. Worst

one yet. She's also developed this

weakness in her right hand.

PAUL

Doctor still think it's migraines?

Hal gives a slight shake of his head.

HAL

I'll be taking her up to Indianola

next day or so for some tests. Had

X-rays and the like. She is scared

to death. Truth to tell, so am I.

PAUL

If it's something they can see

with an X-ray, maybe it's

something they can fix.

HAL

Maybe.

He pulls a letter, hands it to Paul.

HAL

This just came in. D.O.E. on

Bitterbuck.

Paul glances toward Bitterbuck, scans the letter, nods.

PAUL

You didn't come all the way down

here just to hand me a D.O.E.

HAL

No. I had an angry call from the

state capital about twenty minutes

ago. Is it true you ordered Percy

Wetmore off the block.

PAUL

It is.

HAL

I'm sure you had reason, but like

it or not, the wife of the

governor of this state has only

one nephew, and his name happens

to be Percy Wetmore. I need to

tell you how this lays out?

PAUL

Little Percy called his aunt and

squealed like a schoolroom sissy.

(Hal nods)

He also mention he assaulted a

prisoner this morning out of sheer

petulance? Broke three fingers on

Eduard Delacroix's left hand.

HAL

I didn't hear that part. I'm sure

she didn't either.

PAUL

The man is mean, careless, and

stupid. Bad combination in a place

like this. Sooner or later, he's

gonna get somebody hurt. Or worse.

HAL

You and Brutus Howell will make

sure that doesn't happen.

PAUL

Easy enough to say. We can't watch

him every minute, Hal.

HAL

Stick with it. May not be much

longer. I have it on good

authority that Percy has an

application in at Briar Ridge.

PAUL

The mental hospital?

HAL

(nods)

Administration job. Better pay.

PAUL

Then why's he still here? He could

get that application pushed

through...hell, with his

connections, he could have any

state job he wants.

Hal has no answer. Paul look off toward Bitterbuck.

PAUL

Tell you what I think. I think he

just wants to see one cook up

close.

Hal follows Paul's gaze, takes his meaning.

HAL

Well, he'll get his chance then,

won't he? Maybe then he'll be

satisfied and move on. In the

meantime, you'll keep the peace.

PAUL

Of course.

HAL

Thank you, Paul.

Hal rises, slapping yard dust off his trousers.

PAUL

You give Melinda my love, okay? I

bet that X-ray turns out to be

nothing at all.

Hal walks off looking like he's got the weight of the world

on his shoulders. Paul looks at the letter again...

TIGHT ON LETTER

...which is head: Date Of Execution."

DISSOLVE TO:

INT. PAUL'S HOUSE - NIGHT

Paul is at the kitchen table in the wee hours of the morning,

drinking buttermilk and listening to SOFT MUSIC on the radio.

JANICE EDGECOMB appears, shuffling sleepily downstairs.

JAN

Paul?

PAUL

Hey, you. Music too loud?

JAN

No. There's just this big empty

spot in the bed where my husband

usually sleeps.

PAUL

He said to tell you he's having a

little trouble with that tonight.

She comes into the kitchen, strokes his hair. There's an easy

familiarity and a deep love between these two.

JAN

Worried about Melinda and Hal? Is

that what's got you up?

PAUL

Yeah, that. Things.

JAN

Things.

She sits on his lap and gives him a crooked smile--you're not

getting off that easily.

PAUL

Got a new inmate today. Big,

simple-minded fella.

JAN

Do I want to hear what he did?

PAUL

No. One sleepless member of this

family's enough.

(softly)

The things that happen in this

world. It's a wonder God allows it.

She gives him a tiny kiss above his left eyebrow, in that

special spot that makes him prickle.

JAN

Why don't you come to bed? I've

got something to help you sleep,

and you can have all you want.

PAUL

Don't I wish. I've still got

something wrong with my

waterworks, I don't want to pass

it on.

JAN

You see Doc Sadler yet?

PAUL

No, because he'll want me to take

sulfa tablets and I'll spend the

rest of the week puking in every

corner of my office. It'll run its

course all by itself, thank you

very much for your concern.

She kisses that spot above his eyebrow again. He smiles.

JAN

Poor old guy...

DISSOLVE TO:

IN TIGHT ANGLES: Copper plugs are cleaned, switches are

oiled, circuits are tested...

INT. EXECUTION CHAMBER - NIGHT

...as maintenance is performed on Old Sparky by JACK VAN HAY

and a small crew. Paul is carefully sanding a connector plug.

Dean is waxing Old Sparky's wooden arms to a gleam.

Paul and Dean pause, thinking they hear a LAUGH drifting in

from E Block...and then Brutal calls softly to them:

BRUTAL (O.S.)

Paul? Dean?

INT. E BLOCK - NIGHT

Paul and Dean enter to find Brutal trying not to wake the

cons in their cells by laughing too loudly. They follows his

gaze down the Mile, see nothing, turn to him like he's crazy.

BRUTAL

I guess the legislature loosened

those purse-strings enough to hire

on a new guard.

(off their looks)

Look again. He's right there.

Paul and Dean look again and this time they see it:

A tiny brown mouse is coming up the Mile. It trots a short

distance, peers right and left as if checking the snoring

inmates in their cells, then makes another forward spurt.

PAUL

He's doing a cell check.

This gets them all trying not to laugh. The mouse draws ever

closer. Dean starts to look worried.

DEAN

It ain't normal for a mouse to

come up on people that way. Maybe

it's rabid.

BRUTAL

Oh, my Christ. The big mouse

expert. The Mouse Man. You see it

foaming at the mouth, Mouse Man?

DEAN

(dubious)

I don't see its mouth at all.

That does it--Paul and Brutal burst out laughing. The mouse

stops before them and peers up, curling its tail primly

around its paws as if to wait. The guards fall silent,

fascinated. Bitterbuck stirs in his cell, sits up to watch.

Brutal tears off a piece of his half-eaten corned beef

sandwich, holds it delicately out with two fingers. The mouse

rises up, appraising the morsel with shiny black eyes.

DEAN

Aw, Brutal, no! We'll be hip-deep

in mice around here...

BRUTAL

(to Paul)

I just wanna see what he'll do. In

the interests of science, like.

Paul shrugs. Brutal drops the scrap. The mouse grabs it and

eats, sitting up like a dog doing a trick.

The mouse turns and scurries back down the Mile, vanishing

under the restraint room door at the far end. Dean throws

Paul an "I told you so" look.

DEAN

He's in the damn restraint room.

You know he's gonna be chewing the

padding out of walls and making

himself a nice little nest.

Brutal give Paul a sheepish look--well? Paul sighs.

PAUL

All right. Let's get the damn

mouse.

They stride grimly down the Mile to the restraint room door,

men on a mission. Coffey's awake now, peering from his cot.

COFFEY

Saw me a mouse go by.

PAUL

It was a dream. Go back to sleep.

COFFEY

Weren't no dream. It was a mouse

all right.

PAUL

Can't put anything over on you.

Paul unlocks the door, revealing a padded room filled with

storage: cleaning supplies, buckets of paint, mops and

ladders, you name it. Brutal shrugs off his jacket. Paul

grabs a mop from a steel bucket, hands it to Dean.

PAUL

Dean, watch the door. He tries to

get past you, whack him.

DEAN

Brutal or the mouse?

BRUTAL

Har har, Mouse Man.

Brutal and Paul start doing the heavy lifting, muscling an

unused filing cabinet out the door...

DISSOLVE:

...and they finally relay the last few heavy buckets of paint

onto the Mile. Paul and Brutal catch their breath, scanning

the empty restraint room. Their eyes go glaringly to Dean.

PAUL

You let him get past you.

DEAN

No I didn't, I was here all the

time!

BRUTAL

Then where the hell is he?

They move slowly into the room, peering into every nook and

cranny, utterly mystified. Brutal shakes his head.

BRUTAL

Three grown men. Outsmarted by a

mouse.

DEAN

Well, bright side is, all this

commotion probably scared him off

for good.

PAUL

Yeah, that's right. That's the

last we'll see of him...

FADE TO BLACK

IN BLACKNESS, A TITLE CARD APPEARS:

"The Mouse on the Mile"

CUT TO:

INT. E BLOCK - DAY

A low, static shot. Green floor stretching before us. Harry

and Bill Dodge are at the desk b.g., doing paperwork and

filing chores. Percy is idling nearby, whistling softly and

combing his hair...

...and into this quiet shot, deep in foreground, creeps the

mouse. He starts walking the Mile as before...

...right toward Percy.

COFFEY

stares through his bars as the mouse goes by...

PERCY

keeps combing his hair, unaware...

DEL

sits quietly picking his nose in his cell. The mouse appears

outside the bars, cruising inexorably up the Mile. Del turns

slowly, watches the mouse go by...

PERCY

still grooming himself, still unaware...

THE MOUSE

keeps coming closer. ANGLE UP to Bitterbuck peering through

his bars, watching him go by...

PERCY

keeps working that comb--and freezes at the sound of a TINY

SQUEAK. His head swivels slowly...

...and there's the mouse. Staring at him.

That moment of eye contact reveals an enmity older than time

itself. If mice have a natural enemy, Percy is it.

PAUL

You little son of a bitch.

Harry and Bill glance up from their work.

HARRY

Well, I'll be damned. There he is,

big as Billy-be-frigged. I thought

Brutal was pulling my leg.

BILL

That's a goddamn mouse.

HARRY

Yeah. Brute said he was in here

last night begging for food, came

right up to the desk.

BILL

My ass. Give him some room, Percy,

see what he does.

Percy takes a few careful steps back, eyes never leaving the

mouse. (Percy's hand starts easing toward the handle of his

baton.) The mouse comes up to the desk as before.

HARRY

Brave little bastard, gotta give

him that.

Harry breaks off a small piece of cracker and drops it. The

mouse picks it up, starts to eat. (Percy's hand inches ever

closer to his baton).

BILL

Here, lemme try.

Bill drops a piece of cracker. The mouse ignores it

completely, keeping its beady little eyes on Harry. (Percy's

hand starts easing his baton from its holster.)

BILL

Maybe he's full.

HARRY

(grins)

Maybe he knows you're just a

floater. Gotta be an E Block

regular to feed the E Block mouse,

don'cha know...

Harry drops another piece--and sure enough, the mouse starts

to eat. Harry's smile fades. He and Bill trade a look.

HARRY

I was just kidding ab--

Percy lets rip a BELLOWING WAR CRY ("Yaaaahhh!") and launches

his baton like a spear, scaring the crap out of everyone.

The mouse ducks (yes, actually ducks) and the baton sail over

his head close enough to ruffle its fur, bouncing off the

floor. Apparently remembering a pressing engagement

elsewhere, the mouse takes off in a flash toward the

restraint room.

Percy roars with frustration and takes off after it, trying

to squash it with his heavy work shoes, leaping and stomping

with great big galloping strides, missing the mouse by

inches...

...and thus is the Green Mile traversed, with Percy stomping

and hollering like a spastic flamenco dancer, the convicts

yelling at their bars, the mouse zigging and zagging like Jim

Thorpe heading for the endzone...

The mouse wins, zipping to safety under the restraint room

door. Percy pounds his fist against the door in frustration:

PERCY

FUCK!

He fumbles with his keys, unlocks the door, yelling all the

while:

PERCY

I'M GONNA RIP YOUR DISEASED HEAD

OFF, YOU LITTLE PIECE OF SHIT!

OUTSIDE E BLOCK

Paul and Brutal are arriving for work--they pause, hearing

PERCY'S YELLS drifting from the windows. The regular CONS in

the yard are drifting curiously to the fence, wondering if a

riot's brewing. Paul and Brutal take off running--

INSIDE E BLOCK

--and rush in to find:

HARRY

Percy met your mouse.

Harry points. Percy's down at the far end, rummaging wildly

in the restraint room, tossing shit out onto the Mile.

PERCY

It's in here somewhere! I'm gonna

squish the little son of a bitch!

He starts muscling the filing cabinet out the door, kicking

buckets out of his way. Brutal calls out to him:

BRUTAL

Percy, we already tried that--

PERCY

What? Whad'ja say?

BRUTAL

I said--

Paul stops Brutal with a look--don't you dare stop him.

BRUTAL

--uh, knock yourself out. Hope you

nail the bastard.

Paul crosses his arms and smiles, leans back against the desk

to wait...

DISSOLVE:

...and Percy hauls the last of the stuff out, exhausted. He

steps back in and looks around, unable to believe there's no

mouse cowering in the corner. Paul and the men approach,

keeping straight faces, navigating the crap in the corridor.

BRUTAL

Gosh. Ain't in there, huh? Don't

that beat the mousie band?

Percy keeps scanning the restraint room. The others all look

to Paul, waiting for him to speak--you're the boss.

PAUL

Percy. You want to think about

what you were doing just now.

PERCY

(turns, glaring)

I know what I was doing. Trying to

get the mouse. You blind?

HARRY

You also scared the living crap

out of me and Bill. And them.

He cocks a thumb at the inmates in their cells.

PERCY

So what? They aren't in cradle-

school, case you didn't notice...

(directed at Paul)

...although you treat them that

way half the time.

BRUTAL

We don't scare 'em any more than

we have to, Percy. They're under

enough strain as it is.

PAUL

Men under strain can snap. Hurt

themselves. Hurt others. That's

why our job is talking, not

yelling. You'll do better to think

of this place like an intensive

care ward in a hospital--

PERCY

I think of it as a bucket of piss

to drown rats in. That's all.

(scans their faces)

Anybody doesn't like it can kiss

my ass. How's that sit?

Brutal steps forward, wanting to slug the little bastard.

Percy shies back, but keeps his bravado up:

PERCY

Try it. You'll be on the bread

lines before the week is out.

PAUL

We all know who your connections

are, Percy...

(steps close)

...but you ever threaten a man on

this block again, we're all gonna

have a go. Job be damned.

PERCY

Big talk. You done?

PAUL

Get all this shit back in the

restraint room. You're cluttering

up my Mile.

They turn and walk away, leaving Percy as we

DISSOLVE TO:

INT. E BLOCK - NIGHT

A SLOW TRACKING SHOT OF THE GREEN FLOOR takes us past a tiny

scrap of break...and then another...and then past a mousetrap

primed with a scrap of bacon...

...and we keep following a long trail of bread scraps and

mousetraps until we come to Percy, alone on the Mile,

carefully laying the last mousetrap down...

...and he scoots back against the desk to wait, crouched and

holding his breath, eyes riveted to the restraint room door

for any sign of his furry nemesis...

...and CAMERA BOOMS SLOWLY DOWN off his face, dipping down to

floor level...

...where the mouse is revealed under the desk, peering in the

same direction as Percy, wondering what the hell's so

interesting down there. It hops further out to see...

ANGLE OF PERCY FROM FLOOR LEVEL

...and the mouse enters frame, hopping out a few more steps,

mouse and man staring in the same direction.

A long beat. Percy turns, looks down at the mouse. The mouse

turns, looks up at Percy...

...and all hell breaks loose again. They race the Mile as

before, Percy hollering and stomping all the way, mousetraps

snapping and flying up into frame as they go charging wildly

past the cells.

The mouse wins again. Percy pauses, furious...and sees Coffey

staring at him from his cell.

COFFEY

Saw me a mouse go by.

Percy loses it, kicking and punching the restraint room door

in a screaming rage as we

FADE TO:

INT. E BLOCK - DAY

Paul appears at Bitterbuck's bars with a group of guards.

PAUL

Arlen? Your daughter and her

family are here.

Bitterbuck steps from his cell. Bill Dodge escorts him off

the block. The moment they're gone:

PAUL

Let's move. I want at least two

rehearsals before he gets back.

INT. VISITOR'S ROOM - DAY

Bitterbuck is led in. His DAUGHTER rises...an awkward

hesitation...and she touches his face, kisses him. He takes

her hands, kisses them, tries not to cry. The rest of the

family is there: SON-IN-LAW, GRANDCHILDREN, COUSINS. They

form around him, murmuring hellos, shaking hands...

INT. E BLOCK - DAY

...while TOOT-TOOT takes Bitterbuck's place in the cell. He's

a wiry and toothless old trusty, crazy as a tick. He sits:

TOOT

Sittin' down, sittin' down,

rehearsing now! Everybody settle!

He glances to Paul--okay, hit it.

PAUL

Arlen Bitterbuck, step forward.

Toot springs to his feet and steps from the cell.

TOOT

I'm steppin' forward, I'm steppin'

forward, I'm steppin' forward...

Toot turns, shows the top of his head to Dean.

PAUL

Is his head properly shaved?

DEAN

No, it's dandruffy and it smells.

PAUL

I'll take that for a yes. All

right, Arlen, let's go.

Toot starts up the corridor, ringed by guards.

TOOT

I'm walkin' the Mile, I'm walkin'

the Mile, I'm walkin' the Mile...

PAUL'S INNER OFFICE

Toot throws himself to his knees as soon as they enter:

TOOT

I'm prayin', I'm prayin', I'm

prayin'. The Lord is my shepherd,

so on an' so forth...

PAUL

Toot, you have to wait till I tell

you to pray.

(Toot waits)

Okay, pray.

TOOT

Still prayin', still prayin'...

HARRY

Paul, we're not gonna have some

Cherokee medicine man in here

whoopin' and hollerin' and shaking

his dick, are we?

PAUL

Well, actually--

TOOT

Still prayin', prayin', gettin'

right with Jesus...

HARRY

Do it quietly, you old gink!

Harry slaps Toot upside the head to shut him up.

PAUL

As I was saying, I don't believe

they actually shake their dicks,

Harry. Be that as it may, Mr.

Bitterbuck is a Christian, so we

got Reverend Schuster coming in.

DEAN

Oh, he's good. Fast, too. Doesn't

get 'em worked up.

PAUL

On your feet, Toot. You've prayed

enough for one day.

TOOT

Gettin' to my feet, walkin' again,

walkin' on the Green Mile...

EXECUTION CHAMBER

They enter. Brutal is waiting for them, gun drawn. Percy

peers out from behind the partition wall from the switch room.

PERCY

What do I do?

PAUL

Watch and learn.

Paul motions Percy behind the wall. Percy sighs, takes his

spot next to Jack Van Hay, peers through the wire mesh as

Toot plops into Old Sparky, wriggling his skinny ass to get

comfy.

TOOT

Sittin' down, sittin' down, takin'

a seat in Old Sparky's lap...

Paul and Dean kneel to apply the ankle clamps. Brutal steps

in from the side, pressing down on the condemned man's left

arm to keep him in place until the ankle clamps are secure.

Harry moves in from the other side, securing the right arm

clamp.

TOOT

Gettin' clamped, gettin' clamped,

gettin'--ow, shit, watch the skin!

Paul signals "ankles secure." Brutal holsters his pistol,

applies the final clamp to the left arm.

BRUTAL

Roll on one.

BEHIND THE PARTITION

Van Hay mimes turning the generator knob up, whispering:

VAN HAY

"Roll on one" means I turn the

generator up full. You'll see the

lights go brighter in half the

prison...

RESUME MAIN CHAMBER

as Brutal steps before the "condemned" and pronounces:

BRUTAL

Arlen Bitterbuck, you have been

condemned to die by a jury of your

peers, sentence imposed by a judge

in good standing in this state.

Do you have anything to say before

the sentence is carried out?

TOOT

(gleefully)

Yeah! I want a fried chicken

dinner with gravy on the taters,

I want to shit in your hat, and I

got to have Mae West sit on my

face, because I am one horny

motherfucker!

Brutal tries to hold on, but it's impossible--he cracks up.

Everybody falls apart, howling helplessly with laughter. Even

Jack Van Hay is guffawing behind his partition.

Only Paul is reining it in--he's a little too pissed to go

with it. He waits until the laughing fit starts to pass, then:

PAUL

Shut up, Brutal. That goes for

everybody. I want quiet in here.

(turns)

Toot, another remark like that,

I'll have Van Hay roll on two for

real.

BRUTAL

(beat, gently)

It was pretty funny.

PAUL

That's why I don't like it.

Tomorrow night we're doing this

for real. I don't want somebody

remembering a stupid joke like

that and getting going again.

(off their looks)

Ever try not laughing in church

once something funny gets stuck in

your head. Same goddamn thing.

BRUTAL

Sorry, Paul. You're right. Let's

keep going. Harry...

Harry takes a black mask and snugs it down over Toot's head,

leaving only the crown of his head exposed. Brutal takes a

large sponge, dips it in a steel bucket, mimes soaking it...

BEHIND THE PARTITION

PERCY

What's with the sponge?

VAN HAY

You soak it in brine, get it good

and wet. Conducts the electricity

directly to the brain, fast like

a bullet. You don't ever want to

throw the switch on a man without

that.

RESUME MAIN CHAMBER

as the sponge is placed atop Toot's head. Harry now lowers

the steel cap and Brutal secures the straps.

BRUTAL

Arlen Bitterbuck, electricity

shall now be passed through your

body until you are dead, in

accordance with the state law. God

have mercy on your soul.

(to Van Hay)

Roll on two.

BEHIND THE PARTITION

Van Hay mimes flipping the switch, looks to Percy:

VAN HAY

And that's that.

RESUME MAIN CHAMBER

Toot can't resist--he starts bucking and flailing:

TOOT

Now I'm fryin'! Fryin'! Geeaaah!

Fryin' like a done tom turkey!

Paul rolls his eyes at Brutal. Brutal shifts his gaze past

him and nods--look behind you.

BRUTAL

One of the witnesses showed up a

day early.

Paul turns. Sitting on the door sill, watching them with

beady eyes, is the mouse. Paul turns back, addresses the room:

PAUL

All right, let's go again and do

it right this time! Get that idiot

out of the chair...

HIGH WIDE ANGLE OF EXECUTION CHAMBER

Brutal and Harry start undoing Toot's clamps. Everybody

relaxes, drifting from their positions...

DISSOLVE TO:

SAME ANGLE AS ABOVE - NEXT NIGHT

...and the room is now quietly filling up with WITNESSES

trickling in. People speak in whispers, if at all.

INT. BITTERBUCK'S CELL - NIGHT

Bitterbuck, the top of his head now shaved, is speaking

quietly as Paul listens:

BITTERBUCK

You think if a man sincerely

repents on what he done wrong, he

might get to go back to the time

that was happiest for him and live

there forever? Could that be what

heaven is like?

Paul doesn't think so--but that's not what Bitterbuck needs

to hear, so the lie comes easy:

PAUL

I just about believe that very

thing.

Pause. Bitterbuck smiles.

BITTERBUCK

Had me a young wife when I was

eighteen. Spent our first summer

in the mountains. Made love every

night. She'd just lie there after,

bare-breasted in the firelight,

and we'd talk sometimes till the

sun come up.

(beat)

That was my best time.

Brutal appears at the door, checks his pocketwatch, nods to

Paul. Bitterbuck takes a deep breath, getting himself ready.

PAUL

It'll be fine. You'll do fine.

INT. EXECUTION CHAMBER - NIGHT

THE SPONGE is pulled sopping wet from the bucket of brine,

dripping a trail of water across the floor. Brutal places it

atop Bitterbuck's head. Water courses down the sides of the

condemned man's mask and neck, pooling on the floor.

The cap is lowered, the straps secured. All we hear now is

the sound of Bitterbuck's BREATHING growing louder and faster

under the mask...until, softly:

BRUTAL

Roll on two.

WHAM! The switch is thrown. Bitterbuck surges forward against

the straps, riding the powerful current.

Some witnesses turn away. Paul and Brutal maintain grim eye

contact with each other, waiting.

Behind the partition, Percy watches through the mesh with

gleaming eyes, wishing he could see better.

Van Hay kills the current. Bitterbuck goes limp. A DOCTOR

steps forward, checks for a heartbeat, shakes his head.

BRUTAL

Again.

The switch is thrown a second time. Bitterbuck surges forward

again, riding the current all the way...

CUT TO:

INT. E BLOCK ACCESS TUNNEL - NIGHT

Bitterbuck's dead face stares up at us from a gurney. A hand

reaches down, gives his cheek a squeeze. TILT UP to:

PERCY

Adios, Chief. Drop us a card from

hell, let us know if it's hot

enough.

Brutal knocks Percy's hand away, shoves him aside.

BRUTAL

He's paid what he's owed. He's

square with the house again, so

keep your goddamn hands off him.

He draws the sheet over Bitterbuck's face, wheels the gurney

down the tunnel. Percy throws a look to Paul.

PERCY

What's up his ass?

PAUL

You, Percy. Always you.

Paul brushes past him, but:

PERCY

You gotta hate the new boy? That

the way it is around here?

PAUL

(turns back)

Why not just move on? Go to Briar

Ridge.

(off his look)

Yeah, I know about it. Sounds like

a good job.

PERCY

I might take it, too. Soon as you

put me out front.

Paul cocks his head--excuse me?

PERCY

You heard me. I want Brutal's spot

for the next execution.

PAUL

(beat)

What's with you? Seeing a man die

isn't enough? You gotta be close

enough to smell his nuts cook?

PERCY

I wanna be out front, is all. Just

one time. Then you'll be rid of me.

PAUL

If I say no?

PERCY

I might just stick around for

good, make me a career of this.

Paul just shakes his head in wonder and walks away.

FADE TO:

INT. COFFEY'S CELL - DAY

Coffey's lying on his bunk, weeping quiet tears. He stirs at

the sound of GIGGLING. He sits up, peers curiously through

the bars. Softly:

COFFEY

Del?

AT THE GUARD STATION

Paul glances up from writing in the daily log. Silence now.

He goes back to writing--and the GIGGLING comes again.

PAUL

Delacroix? That you?

No answer. Just more giggling. Paul rises, walks down the

Mile to Delacroix's cell--and stops, staring in through the

bars.

PAUL'S INNER OFFICE

Brutal and Dean are having lunch. Paul pokes his head in.

PAUL

You are not gonna believe this.

RESUME E BLOCK

The men follow Paul onto the Mile. By now, Del is CACKLING

WILDLY in his cell. Brutal shoots Paul a look--has he gone

insane? Paul gestures "see for yourself."

They arrive at the bars...and find the mouse sitting on Del's

shoulder. Del looks up, giggling like a kid at Christmas.

DEL

Look! I done tame me dat mouse!

PAUL

We see that.

DEL

Watch dis! Watch what he do!

He stretches out his left arm. The mouse crawls over the top

of his head, scampers along his arm to the wrist, turns

around and scampers back. The guards just stand there,

staring.

DEL

Ain't he sumpthin now? Ain't Mr.

Jingles smart?

PAUL

Mr. Jingles?

DEL

Dat his name. He whisper it in my

ear. Cap'n, can I have a box for

my mouse so he can sleep in here

wi' me?

PAUL

I notice your English gets better

when you want something.

DEL

Wanna see what else he can do?

Watch, watch, watch...

He puts the mouse on the floor, grabs a small wooden spool.

The mouse sees it, poises like a man getting ready for a race.

DEL

We play fetch, Mr. Jingles? We

play fetch?

He tosses the spool across the floor, bounces it against the

wall. The mouse goes after it like a dog after a stick--and

proceeds to push it back to the bunk, rolling it with its

front paws all the way to Delacroix's feet.

By now, the guard's jaws are hanging open. Paul's got a funny

little chill running up his spine.

DEL

He fetch it ever' time. Smart as

hell, ain't he? We do da trick

again, watch, watch, watch...

Again he throws the spool. Again the mouse goes after it,

starts rolling it back. Del howls with laughter, claps his

hands like a kid. Brutal murmurs to the others:

BRUTAL

Who's training who here?

COFFEY

That's some smart mouse, Del. Like

he's a circus mouse or something.

DEL

A circus mouse! Dat jus' what he

is, too! A circus mouse! I get

outta here, he make me rich, see

if he don't!

He picks up the spool again, makes a drumroll sound, tosses

it. The mouse does its thing, rolling the spool back...

...as Percy enters the scene. Del catches sight of him and

scoops up his mouse, drawing fearfully back on his bunk. He

tries to hide Mr. Jingles in his hands--but the mouse

wriggles from his grasp and scampers up on top of his head,

where he regards Percy with mistrustful, beady mouse eyes.

PERCY

Well, well. Looks like you found

yourself a new friend, Eddie.

Del tries to offer some defiance--but all he can manage is:

DEL

Don' hurt him, 'kay? 'kay?

Percy shrugs as if to say "no skin off me", looks to Paul.

PERCY

That the one I chased?

PAUL

(level)

Yes, that's the one. Only Del says

his name is Mr. Jingles.

PERCY

Is that so?

Paul trades a look with the others, everybody wondering just

what the hell's going through Percy's mind.

PAUL

Del was just asking for a box. He

thinks the mouse will sleep in it,

I guess. That he might keep it for

a pet. What do you think?

PERCY

I think it'll shit up his nose

some night and run away, but I

guess that's Del's lookout.

(beat)

We oughtta find a cigar box. Get

some cotton batting from he

dispensary to line it with. That

should do real nice.

Percy walks away, leaving them dumbstruck. Paul turns to the

others. Of all the things they've seen in the last few

minutes, Percy being nice is the most amazing of all.

PAUL

Man said get a cigar box.

CUT TO:

INT. PRISON ADMINISTRATION BUILDING - DAY

Paul comes up the stairs to the warden's office...

INT. WARDEN MOORES' OFFICE - DAY

...and enters to find Hal staring out the window.

PAUL

Hal? You wanted to see me?

HAL

Yeah. Paul. Close the door.

Hal's speech is halting, his thoughts disjointed and slow:

HAL

Uh. So you know. You got a new

prisoner coming in tomorrow.

William Wharton. Young kid. Wild

as hell, judging from this...

He picks up the report, trying to focus his thoughts:

HAL

...been rambling all over the

state last few years, causing all

kinds of trouble. Finally hit big

time. Killed three people in a

holdup, including a pregnant

woman. Got "Billy the Kid"

tattooed on his left arm...bad

news all around...

He trails off, no longer able to focus on the words. Paul is

shocked to see tears spill silently down his cheeks.

PAUL

Hal?

HAL

It's a tumor, Paul. A brain tumor.

Paul doesn't know what to say. Hal looks at him.

HAL

They got X-ray pictures of it.

It's the size of a lemon, they

said, and way down deep inside

where they can't operate. They say

she'll be dead by Christmas. I

haven't told her. I can't think

how. For the life of me, Paul, I

can't think how to tell my wife

she's going to die.

Hal Moores, one of the toughest and steadiest men you'd ever

meets, starts to cry. He dissolves into great big gasping

sobs, losing all control.

CUT TO:

INT. PAUL'S BEDROOM - NIGHT

Paul lies awake, watching Jan sleep. He looks troubled--not

to mention feverish. It occurs to him how badly he has to

pee. He sits up, clutching at a queasy stab of pain in his

groin...

LIVING ROOM STAIRS

...and comes hurrying down the steps, clutching himself...

EXT. HOUSE - NIGHT

...and he's moving even faster as he exits the kitchen,

racing for the outhouse. He realizes he's not going to make

it, stops to piss near the woodpile at the corner of the

house...

...and as he does, he's hit with the most stunning pain of

his life. He buckles to his knees--it's only his flailing

hand against the woodpile that prevents him from going face-

first into his own piss. He crams his other hand to his mouth

in an enormous effort not to scream and wake his wife.

He manages to ride it out until his bladder empties. He falls

onto his side, rolls over on the grass, and stares up at the

sky with both hands pressed to his groin.

PAUL

...oh God...oh God...

FADE TO BLACK

IN BLACKNESS, A TITLE CARD APPEARS:

"Coffey's Hands"

CUT TO:

INT. PAUL'S KITCHEN - MORNING

Paul looks feverish and clammy as he buttons up his uniform

jacket. Jan is packing his lunch, throwing him looks, knowing

how sick he is.

PAUL

I'm going.

JAN

What?

PAUL

To the doctor. I'm going.

(off her look)

Today. Just as soon as we get the

new inmate squares away.

JAN

That bad?

PAUL

Oh yeah.

She hands him his brown-bagged lunch, kisses his face.

CUT TO:

INT. BRIAR RIDGE MENTAL HOSPITAL - MORNING

We see a tattoo: "Billy the Kid." TILT UP to WILLIAM WHARTON

staring out the window, wearing a hospital gown, his face

utterly blank. He looks heavily medicated.

Harry, Dean, and Percy enter. Billy doesn't react, just keeps

staring out. Harry waves his fingers in Billy's face.

HARRY

Boy's doped to the gills. Dean,

hand me them clothes...

Dean relays some folded prison clothes to Harry.

HARRY

William Wharton! Hey! I'm talking

to you! Put these clothes on!

Billy turns with a vacant look, takes the clothes. He fumbles

with the shirt, drops the pants. Harry and Dean sigh.

They strip Billy's hospital gown off and proceed to put the

shirt on him, guiding his limp arms through the sleeves.

PERCY

Hellraiser, huh? Looks more like

a limp noodle to me. Hey! Hey, you!

Billy looks up, meets Percy's eyes.

PERCY

You been declared competent! Know

what that means? Mean's you're

gonna ride the lightning, son!

Percy does a quick impression of a man jittering and jerking

in the electric chair.

PERCY

Bzzzzzzzzt-zap! Just like that!

How's it feel to know you're gonna

die with your knees bent?

DEAN

C'mon, Percy, give us a hand.

Laughing, Percy picks up the pants. They proceed to help

Billy into them one leg at a time...

CUT TO:

INT. E BLOCK TOILET - DAY

Paul is trying to piss. Except for a few drops hitting the

bowl, excruciating pain seems to be the only result. He gives

up, grabs a towel, wipes the sweat from his feverish face...

INT. E BLOCK - DAY

...and steps gingerly from the toilet. Del's watching.

DEL

Don' look so good, boss. Look like

you runnin' you a fever.

Paul shoots him a baleful look--no kidding. Another voice

calls softly from further down the Mile:

COFFEY (O.S.)

Boss Edgecomb? Needs ta see you

down here, boss.

PAUL

Got things to tend to just now,

John Coffey. You be still in your

cell now, y'hear?

Coffey falls silent. Paul goes to the entrance door and peers

through the viewing slot, anxious to have this over with...

EXT. COLD MOUNTAIN PENITENTIARY - DAY

The prison truck appears, swaying along the rutted road...

IN THE TRUCK

...while Billy Wharton stares at nothing, drool dripping from

his slack mouth in long strings.

INT. E BLOCK - DAY

Paul watches the truck pull in. He draws away from the slot,

proceeds toward the empty cell which used to be

Bitterbuck's...

ANGLE ON TRUCK

The rear doors are swung open. Harry emerges. Dean and Percy

are guiding Billy by the arm, helping him down...

INSIDE E BLOCK

Paul waits at the empty cell. ANGLE PANS TIGHT to Coffey at

his bars, eyes widening in a blossoming of some nameless fear

or dread. Something bad's coming. A whisper:

COFFEY

Careful.

OUTSIDE E BLOCK

Billy is brought to the door. Dean pulls his keys, starts to

unlock it. We PUSH IN on Billy's face, where the tiniest

trace of a smile is starting to grow...

INSIDE E BLOCK

...and Coffey's unease grows with it. he presses his face to

the bars, his whispering becoming more urgent:

COFFEY

Careful. Careful.

Paul hears him, glances back with a puzzled look. Coffey's

gaze is directed at the door, which is being unlocked...

THE DOOR

...and opened. In that moment, the slack look on Billy's face

gives way to a wild grin. A CRAZED SCREECH leaps from his

throat, a cross between a rebel yell and a dog being

tortured, freezing everybody's blood in their veins--

BILLY

Yeeeeeeehaaaawwwwwwrooooo!

--and he drops his wrist-chain down over Dean's head, jerks

it tight, begins to strangle him. Dean lurches forward, Billy

riding/propelling him through the door onto the Mile.

Percy stands frozen in the doorway, stunned. Harry shoves him

aside and jumps on Billy from behind, trying to get him off

Dean. Dean is choking, turning purple.

Paul rushes from the cell to join the fray. Billy whirls,

delivering a stunning kick to Paul's groin. Paul's bladder

pain goes nuclear--he falls back in agony, clutching himself

and sucking air through his teeth, unable even to scream.

Billy rams an elbow into Harry's face, knocks him sprawling

on the desk, screaming and laughing and howling all the while:

BILLY

WHOOOEE, BOYS! AIN'T THIS A PARTY,

NOW? IS IT, OR WHAT?

Paul forces himself to his feet, pulls his revolver, draws

down on Billy...

PAUL

LET HIM GO!

...but Billy jerks Dean around, using him as a shield...

BILLY

G'WAN, SHOOT! SEE WHO YA HIT!

Dean is choking, dying. Paul is shifting his aim, trying for

a clear shot, not getting one. Percy's still just inside the

doorway, pressed against the wall with fear...

PAUL

HIT HIM, PERCY! GODDAMN IT, HIT

HIM!

BILLY

C'MON, PERCY, HIT ME! HIT ME, YOU

LIMP NOODLE, HIT ME! YEEHAWWW!

...and suddenly a hand comes in, grabs the hickory stick out

of Percy's grasp, raises it high--

--it's Brutal coming through the door. He swings the baton

and lands an awesome blow to Billy's head--THUMP! The force

of it spins Billy off his feet and slams him flat on his back.

Dean crawls away, gulping ragged breaths of air. Amazingly,

Billy's still conscious--he looks up at Brutal and laughs:

BILLY

Big fucker. Snuck up on me. No

fair.

Still laughing, he makes another grab at Dean. Brutal whacks

him again, turning his lights out for good. Brutal drops to

Dean's side, helping him hack air back into his lungs:

BRUTAL

Breathe...breathe...that's it...

Everybody's reining in their adrenaline. Paul glares at Harry.

HARRY

We thought he was doped.

(to Percy)

Didn't we? Didn't we all of us

think he was doped?

Percy nods, still numb. Paul is furious:

PAUL

You didn't ask? I guess that's not

a mistake you'll be need to make

again anytime soon, is it?

Harry shakes his head miserably. Paul grabs Billy by the feet.

PAUL

Grab his arms! You too, Percy!

(off Percy's

hesitation)

Percy, goddamn it, get your feet

out of cement and help us out here!

Percy finally unfreezes. The three of them hoist Billy up in

a dead-lift, get him in his cell, toss him on the cot. They

step out, slam the door, lock it. Paul looks to Harry and

Brutal.

PAUL

Get Dean looked at right away,

make sure he's all right.

Percy, you go make a report to the

warden for me. Start off by saying

the situation is under control--

it's not a story, he won't

appreciate you drawing out the

suspense.

BRUTAL

What about you? You look about

ready to collapse.

PAUL

I've got the Mile till you all get

back. Go on now.

They all exit. As soon as he's alone, Paul gives in to the

pain, holding his crotch and sinking to his knees with a

moan. It's so bad he actually lays down on the Mile, face

pressed against the cool linoleum, wishing he were dead. A

stretch of silence...and then:

COFFEY (O.S.)

Boss? Needs ta see ya down here.

PAUL

This is not a good time, John

Coffey. Not a good time at all.

COFFEY (O.S.)

But I needs ta see ya, boss. I

needs ta talk t'ya.

Paul sighs. Things couldn't get much worse than this. He

rises with a supreme effort, walks painfully down the Mile...

COFFEY'S CELL

...and finds Coffey waiting at his bars.

COFFEY

Closer.

PAUL

I'm alone here right now, John.

Figure this is close enough.

COFFEY

Boss, please. I got to whisper in

your ear.

Paul blinks. Maybe it's the fever clouding his brain, or

maybe...hell, is this what being hypnotized is like? He tries

to shake the sensation off, comes a little closer.

DEL

Boss? You know you not s'pose to

do dat.

PAUL

Mind your business, Del. What do

you want, John Coffey?

COFFEY

Just to help.

His hand shoots out, grabs Paul by the collar, jerks him

close. Paul makes a panic-grab for his revolver...

...but Coffey lays his free hand atop Paul's, eases his grip

from the gun--no need for that. Coffey's hand then drifts

slowly down, easing to Paul's crotch...

PAUL

(stunned, frozen)

What are you...doing?

...and something goes WHUMP through Paul's body. He arches

back with his mouth agape and arms outstretched as a rush of

energy seems to pass from Paul through Coffey's hand...

...and then it's over. Paul comes back to the real world,

weak against the bars, realizes Del is hollering in his cell:

DEL

HELP! JOHN COFFEY'S KILLING BOSS

EDGECOMB! HELP!

PAUL

Del, Chrissake, settle down, I'm

fine...

It dawns on him that he really is fine. Fever's gone. So is

the pain in his groin. John Coffey, though, seems to be

having trouble. He sits down on his bunk, bends forward,

gagging like a man with a chicken bone caught in his throat.

PAUL

John? John, what's wrong?

Paul fumbles his keys to the lock, unsure if he should open

the door, watching the big man's contortions grow stronger

like a cat trying to cough up a hairball...

...and then comes an unpleasant, gagging/retching sound as

Coffey's lips draw back from his teeth in a kind of godawful

sneer...and he exhales a cloud of what look like tiny black

insects. They swirl furiously in front of his face, turn

white...and disappear. Paul just stares, stunned. Softly:

PAUL

What did you do, big boy? What did

you do to me?

COFFEY

I helped it. Didn't I help it?

PAUL

Yes, but...how?

Coffey shrugs--it's something that just is.

COFFEY

Just took it back, is all. Awful

tired now, boss. Dog tired.

He rolls onto his bunk, faces the wall. Paul just stares at

him, stunned. He turns and walks up the Mile, his stiffness

and pain now gone. Del watches him go by, also stunned:

DEL

What dat man do to you? He throw

some gris-gris on you?

(off Paul's look)

You look diff'int! Even walk

diff'int. Like y'all better!

PAUL

You're imagining thing. Lie down,

Del. Get you some rest.

Paul continues up the Mile...

E BLOCK TOILET

...and steps back into the toilet. Not trusting this

situation for even a moment, Paul opens his fly, takes a deep

breath to prepare himself for the pain, starts to pee...

...and we hear a healthy stream of water hitting the bowl.

The look on Paul's face says it all--blessed relief.

CUT TO:

INT. PAUL'S HOUSE - DUSK

Paul comes home from work, still looking numb about the whole

thing. He drifts to the kitchen door. Jan's at the counter,

slicing vegetables for dinner. She glances at him.

JAN

Hi, honey. How are you feeling?

PAUL

Um...not too bad.

She turns back. Paul's eyes drift down to admire her ass.

JAN

What did the doctor say?

No response. He's too busy staring. She turns again--he

glances hastily up.

PAUL

Oh, you know doctors. Gobble-de-

gook mostly.

She turns back, keeps working. He crosses the room, eyeing

her ass all the way...and surprised her by pressing up

against her from behind, running his hands along her hips.

JAN

Paul? What are you doing?

He starts laying kisses on the back of her neck, giving her

pleasant shivers, murmuring:

PAUL

What's it feel like?

JAN

I know what it feels like...it

feels great...but...Paul...

He's getting her breathless. She turns into his arms and they

get into some passionate kissing. It's not too long before

they're frantically peeling each other's clothes off...

INT. BEDROOM - NIGHT

...and we find them having a wild tumble in the sheets, both

moaning and groaning, sweating and panting. She pushes him

flat on the bed, pauses to catch her breath...

JAN

Those must've been some pills.

...and they keep going, rutting like crazed weasels...

EXT. HOUSE - NIGHT

...as their moans go drifting into the night...

FADE TO:

SAME ANGLE AS ABOVE - DAWN

...and they're still moaning up there as the sun creeps up.

INT. BEDROOM - MORNING

Jan falls back, exhausted after the latest go-round. She

catches her breath, looks over at Paul, and finally:

JAN

Paul? Not that I'm complaining.

But we haven't gone four times in

one night since we were nineteen.

(off his look)

You wanna tell me just what the

hell's going on?

PAUL

Well...thing is...I never actually

got to the doctor yesterday...

She gives him a look--oh?

CUT TO:

INT. LIVING ROOM - MORNING

Paul is on the phone:

PAUL

Brutal? Listen...I'm thinking of

taking the morning off sick. You

cover the fort for me?

(beat)

That's swell. Thanks. Yeah, I'm

sure I'll feel better. Okay.

He hangs up, turns to Jan.

JAN

You sure you ought to do this?

PAUL

I'm not sure what I'm sure of.

CUT TO:

EXT. ROAD TO TEFTON - DAY

Paul's model T comes putt-putting up the road past a sign:

"Trapingus County Welcomes You."

EXT. HOUSE IN TEFTON - BACK PORCH - DAY

BURT HAMMERSMITH, public defender for Trapingus County, sits

with a cold soda and a magazine, watching his TWO CHILDREN

playing on a swing at the far end of the backyard. The screen

door opens and CYNTHIA HAMMERSMITH ushers Paul out.

CYNTHIA

I offer you a cold drink?

PAUL

Yes, ma'am, a cold drink would be

fine. Thank you.

She goes back inside. Burt rises.

PAUL

Mr. Hammersmith. Your office said

I'd find you at home today. I hope

I'm not troubling you.

BURT

That depends, Mr.--?

PAUL

Paul Edgecomb. I'm the E Block

superintendant at Cold Mountain.

BURT

The Green Mile. I've heard of it.

Lost a few clients your way.

PAUL

That's why I'm here. I'd like to

ask you about one of them.

Burt settles back down, motions "please sit".

BURT

Which client? Now you got my

curiosity aroused.

PAUL

John Coffey.

BURT

Ah, Coffey. He causing you

problems?

PAUL

No, can't say he is. He doesn't

like the dark. He cries on

occasion. Other than that...

BURT

Cries, does he? Well, he's got a

lot to cry about, I'd say. You

know what he did.

PAUL

(nods)

I read the court transcripts.

Cynthia reappears, hands Paul a cold root beer.

PAUL

Thank you, Missus.

CYNTHIA

My pleasure. Kids! Lunch is about

ready! Y'all come on up!

She goes back inside, but the kids aren't quite able to tear

themselves away from their play.

BURT

What exactly are you trying to

find out? Satisfy my curiosity,

I'll see if I can satisfy yours.

PAUL

I've wondered if he ever did

anything like that before.

BURT

Why? Has he said anything?

PAUL

No. But a man who does a thing

like that has often developed a

taste for it over time. Occurred

to me it might be easy enough to

follow his backtrail and find out.

A man his size, and colored to

boot, can't be that hard to trace.

BURT

You'd think so, but you'd be

wrong. Believe me, we tried. It's

like he dropped out of the sky.

PAUL

How do you explain that?

BURT

We're in a Depression. A third of

the country's out of work.

People are drifting by the

thousands, looking for work,

looking for that greener grass.

Even a giant like Coffey wouldn't

get noticed everywhere he goes...

not until he kills a couple of

little girls.

PAUL

He's...strange, I admit. But there

doesn't seem to be any real

violence in him. I know violent

men, Mr. Hammersmith. I deal with

'em day in and day out.

Burt smiles, realizing:

BURT

You didn't come up here to ask me

whether he might have killed

before. You came up here to see if

I think he did it at all. That's

it, isn't it?

PAUL

Do you?

BURT

One seldom sees a less ambiguous

case. He was found with the

victims in his arms. Blurted out

a confession right then and there.

PAUL

Yet you defended him.

BURT

Everyone is entitled to a defense.

Cynthia hollers from an open window:

CYNTHIA

Kids! Lunch!

BURT

Y'all listen to your Momma, now!

The kids start this way. Burt turns back to Paul.

BURT

Tell you something. You listen

close, too, because it might be

something you need to know.

PAUL

I'm listening.

BURT

We had us a dog. No particular

breed, but gentle. Ready to lick

your hand or fetch a stick. Just

a sweet mongrel, you know the kind.

(Paul nods)

In many way, a good mongrel dog is

like you negro. You get to know

it, and often you get to love it.

It is of no particular use, but

you keep it around because you

think it loves you. If you're

lucky, Mr. Edgecomb, you never

have to find out any different. My

wife and I were not so lucky.

Caleb. Come here for a second.

The little boy comes to him, staring at his feet. Burt tires

to raise the boy's chin. The boy resists for a moment...

BURT

Please, son.

...and then his face comes around. He's horribly scarred on

that side, the eye missing.

BURT

He has the one eye. I suppose he's

lucky not to be blind. We get down

on our knees and thank God for

that much at least. Right Caleb?

(the boy nods shyly)

Okay, go on in now.

The boy races inside after his sister. Paul follows Burt's

gaze off toward the rear of the property, where an unoccupied

doghouse stands weathered and sad in the weeds.

BURT

That dog attacked my boy for no

reason. Just got it into his mind

one day. Same with John Coffey. He

was sorry afterwards, of that I

have no doubt...but those little

girls stayed raped and murdered

nonetheless. Maybe he's never done

it before--my dog never bit

before, but I didn't concern

myself with that. I went out there

with my rifle and grabbed his

collar and blew his brains out.

PAUL

I'm sorry for your trouble.

Burt acknowledges the condolence with a gracious nod.

BURT

I'm as enlightened as the next

man, Mr. Edgecomb. I would not

bring back slavery for all the tea

in China. I believe we have to be

humane and generous in our efforts

to solve the race problem. But we

have to remember that the negro

will bite if he gets the chance,

just like a mongrel dog will bite

if it crosses its mind to do so.

(beat)

Is Coffey guilty? Yes, he is.

Don't you doubt it, and don't you

turn your back on him. You might

get away with it once or even a

hundred times...but in the end...

He raises his hand, making biting motions with his fingers.

BURT

You understand?

Paul says nothing. Burt gazes out again. Softly:

BURT

I'm gonna have to tear that old

doghouse down one of these days.

CUT TO:

INT. PAUL'S MODEL T - DAY

Paul drives back to Cold Mountain, his heart conflicted...

INT. E BLOCK - DAY

...and he walks onto the Mile with a bundle wrapped in a dish

towel. Brutal glances up from the desk, sniffing the air.

PAUL

No, it's not for you.

Paul continues down the Mile. Whatever he's carrying, the

smell of it brings Del to his bars. Even Mr.Jingles comes

skittering out of his cigar box, sniffing.

DEL

Oh. Oh my.

Paul arrives at Coffey's cell. Coffey's on his bunk facing

the wall. His head comes around, drawn by the aroma. He sits

up, wipes the tears leaking from his eyes, looks at Paul.

COFFEY

I'm smelling me some cornbread.

Paul speaks softly so the others can't hear:

PAUL

It's from my missus. She wanted to

thank you.

Coffey nods thoughtfully, absorbing this notion. Then:

COFFEY

Thank me for what?

PAUL

You know. For helping me.

COFFEY

Helping you with what?

Paul motions discreetly to his crotch.

COFFEY

Ohhh.

(beat)

Was your missus pleased?

PAUL

Several times.

Paul hands him the bundle through the bars. Coffey takes it,

uncovers the cornbread reverently, gazes back up.

COFFEY

This all for me?

Paul nods. Across the way, Del is pressing his face longingly

through the bars while Mr. Jingles crawls on his shoulder.

DEL

Oh my. John, I can smell it from

here. I surely can.

COFFEY

(looks to Paul)

Can I give some to Del?

PAUL

It's yours, John. You do with it

as you please.

John carefully scoops a big chunk of cornbread out with his

enormous hand, holds it through the bars to Paul.

COFFEY

Here's for Del and Mr. Jingles

then.

BILLY

Hey! What about me? I'm'a get some

too, ain't I

Coffey looks to Paul--do I have to?

PAUL

It's yours, John. As you please.

COFFEY

Well. Fine. I think I'll keep the

rest, then.

He smiles like a big kid, digging in with his fingers. Paul

crosses the Mile to Del's cell, hands him his share.

PAUL

Courtesy of the gentleman across

the way.

DEL

Oh, John. So very fine of you. So

very kind. Mr. Jingles t'ank you.

COFFEY

(mouth full)

...wel'cm...

BILLY

Hey! What about me? Don't you hold

out on me, ya big dummy nigger!

Paul's temper flares--he steps to Billy's cell.

PAUL

You'll keep a civil tongue on my

block.

Beat. Billy spits in Paul's face and follows it up with a big

grin--what are you gonna do about that? Paul is seething as

he wipes the spit off, but keeps his temper where it belongs.

PAUL

You get that one for free. But

that's the last one.

Paul walks away. Billy laughs, hollering after him:

BILLY

That's it? Just that little bitty

one? Guess I'll have to pay out

for the rest, huh?

DISSOLVE TO:

INT. E BLOCK - DAY

Harry is walking the Mile, doing a cell check and jotting on

a clipboard. He pauses, making a notation...

...and a long stream of piss hits his leg. Billy's at his

bars, peeing on him. Harry jumps back, stunned. Billy howls

with laughter, hosing his aim wildly from side to side.

BILLY

Yeehaaw! Good shot, weren't it?

Oh, the look on your face!

Paul and Brutal come running. Harry's just flabbergasted:

HARRY

You believe this? Son of a bitch

pissed on me!

BILLY

Hey, d'jall like that? I'm

currently cooking some turds t'go

with it! Nice soft ones! I'll have

'em out t'yall tomorrow!

Paul stays calm, turns to Brutal, nods at the restraint room.

PAUL

We've been looking to clear that

room out anyway.

TIMECUT:

A STREAM OF GUARDS comes toting the last of the restraint

room stuff past Billy's cell while he heckles them from the

bars...

BILLY

Hey! Whassit now, movin' day?

Y'all wanna come in and dust a

little? Y'can shine my knob for me

while yer at it!

...and he pauses as Paul and Brutal step to the bars. Paul

has a canvas straitjacket. Brutal pulls his nightstick.

BILLY

You can come in here on your legs,

but you'll go out on your backs,

Billy the Kid guarantee ya that.

(motions to Brutal)

C'mon, fuckstick. No sneakin' up

on me this time. We'll go man to

man, see who's the better fel--

Brutal unlocks the cell--and sidesteps, revealing Harry

pointing a fire hose. The hose erupts, driving Billy across

the cell with bone-jarring force. They batter him half-

senseless, then cut the water. Billy collapses in a heap.

Paul and Brutal drag him semi-conscious from his cell and get

the straitjacket on him. He comes around as they draw the

straps tight and pull him to his feet.

PAUL

C'mon, Wild Bill. Little walky

walky.

BILLY

Don't you call me that! Wild Bill

Hickock wasn't no range rider! He

was just a bushwackin' John Law!

Dumb sonovabitch sat with his back

to the door and kilt by a drunk!

BRUTAL

Oh, my suds and body! A history

lesson! You just never know what

you're gonna get when you come to

work everyday on the Green Mile.

Thank you, Wild Bill.

Billy lets out a scream of rage and throws himself at Brutal.

Brutal, bored, shoves him back toward Paul, who then propels

him down the Mile toward the open restraint room door. Billy

sees where they intend to put him, resorts to pleading:

BILLY

Oh, not in there! C'mon now, I'll

be good! Honest Injun I will! No!

No! Ummmmhhhh...urg...ah!

He suddenly drops to the floor, bucking and jerking wildly,

spewing drool. Harry's eyes go wide.

HARRY

Holy Christ, he's pitchin' a fit!

Paul reaches down and unceremoniously starts dragging Billy

kicking and writhing the rest of the way.

PAUL

He'll be fine, boys. Trust me on

this one.

Brutal helps Paul toss Billy headlong into the padded room.

They slam the door...

RESTRAINT ROOM

...and Billy staggers to his feet in the straitjacket,

inarticulate with rage, starts throwing himself against the

door, screaming at the top of his lungs.

BILLY

ALL I WANTED ME WAS A LITTLE

CORNBREAD, YOU MUTHERFUCKERS!

FADE TO:

INT. E BLOCK - NEXT DAY

Paul and Brutal unlock the restraint room. Billy looks up

from the corner, pale and drained. Softly:

BILLY

I learnt my lesson. I'll be good.

CUT TO:

INT. E BLOCK - DAY

Billy's back in his cell, quiet for a change. Toot-Toot is

outside the bars, mopping the floor. Billy notices a

chocolate Moon Pie in Toot's shirt pocket.

BILLY

Pssss. Hey. Give'ya nickel for

that Moon Pie.

Toot looks around. Nobody's watching, and a nickel's a

nickel. He steps to Billy's bars, swaps the Moon Pie for the

money.

Toot hurries away. Billy unwraps the Moon Pie, makes sure

he's not being watched...and crams the entire thing into his

mouth...

DISSOLVE:

...and here comes Brutal strolling down the Mile, doing a

cell check and jotting on a clipboard. He pauses, seeing:

Billy at his bars. Just standing there staring. His cheeks

bulging way out.

Brutal steps closer, fascinated...what the fuck is that.

Billy waits until he's just a bit closer--

--and he slams his fists against his own cheeks, propelling

a disgusting spew of liquefied chocolate sludge into Brutal's

face. Billy falls back onto his bunk, shrieking with laughter:

BILLY

Li'l Black Sambo, yassuh, boss,

yassuh, howdoo you do?

BRUTAL

(beat, calmly)

Hope your bags are packed.

TIMECUT:

...and once again, Billy gets dragged to the restraint room,

kicking and screaming all the way. They toss him in, slam the

door. Brutal turns, still wiping traces of sludge off.

PAUL

The Moon Pie thing was pretty

original. Gotta give him that.

Brutal nods. They walk away as we

FADE TO:

INT. E BLOCK - DAY

Paul and Brutal appear at Del's bars with Harry and Dean.

PAUL

Del, grab your things. Big day for

you and Mr. Jingles.

DEL

Whatchoo talkin' bout?

PAUL

Important folks heard about your

mouse, wanna see him perform. Not

just guards, either. One of them's

a politician all the way from the

state capital, I believe.

Del swells with pride upon hearing this. He scrounges up Mr.

Jingles props, steps from his cell, looks to Harry and Dean.

DEL

You fellas comin'?

HARRY

We got other fish to fry just now,

Del, but you knock 'em for a loop.

Del nods, beaming happily, looks to Coffey in his cell.

COFFEY

You knock 'em for a loop like Mr.

Harry says, Del.

Brutal leads Del up the Mile, Paul and the others at their

heels. Percy's at the duty desk. He smirks and rolls his eyes

as Del goes by. The moment Brutal and Del are out the door...

...Toot emerges from Paul's office where he's been hiding.

PAUL

Let's move along briskly, folks.

There's not much time.

Toot hurries down to take his place in Del's cell.

TOOT

I'm sittin' down, I'm sittin'

down, I'm sittin' down.

INT. OFFICE/ADMINISTRATION BUILDING - DAY

A HALF DOZEN GUARDS are waiting. We find Bill Dodge fixing

the tie of a fat good ol' boy named EARL.

EARL

Been sweepin' floors here ten

years, never had to wear no damn

tie before.

BILL

You're a V.I.P. today, Earl, so

just shut up.

A KNOCK at the door. Everybody takes a seat. Del is ushered

in by Brutal. Del faces his audience, puts his hands to his

chest in a "thank you" gesture worthy of Lillie Langtry

before her adoring public, then announces grandly:

DEL

Messieurs et mesdames! Bienvenue

au cirque de mousie!

INT. EXECUTION CHAMBER - DAY

The steel cap is lowered over Toot's head, the straps

tightened. TILT UP to Percy as:

PERCY

Roll on two.

Behind his partition, Van Hay mimes flipping the switch.

VAN HAY

That's that.

A pause. Percy looks anxiously to Paul, who's trading glances

with the other guards. Finally:

PAUL

Very good. Very professional.

Percy smiles. Harry and Dean step up, slapping his back and

shaking his hand...

INT. E BLOCK - DAY

...and they're still chatting a short time later, waiting for

Del's return. Percy actually looks happy for a change,

feeling genuinely accepted for the first time...

Billy is watching from his cell. Just watching.

The door opens. Del returns with Mr. Jingles on his shoulder,

escorted by Brutal. Brutal is toting the cigar box and spool

like a magician's assistant carrying the boss' props.

PAUL

Well?

DEL

They love Mr. Jingles! They laugh

and cheer and clap they hands!

PERCY

Well, that's just aces. Pop back

in your cell, old-timer.

The generosity of Percy's tone catches Del completely off

guard. Del gives him a look of almost comical mistrust...

...and the old Percy comes back. He bares his teeth in a mock

snarl and curls his fingers as if to grab Del. It's a joke,

but Del doesn't know that--he jerks back in fear and trips

over Brutal's big feet. Del goes down hard, hitting the

linoleum with the back of his head. Mr. Jingles jumps clear,

goes squeaking down the Mile. Del sits up, painfully

clutching his head. Brutal helps him up...

BRUTAL

Percy, you shit.

...and moves him toward his cell. Percy is actually moved to

apologize--he starts after them with a half-laugh, drifting

much too close to Wild Bill's side of the Mile...

PERCY

Del! Hey, you numb wit, I didn't

mean nothin' by it! You all ri--

...and Wild Bill's arms thrust out, grabbing Percy and

slamming him back against the bars with an arm around his

throat. Percy squeals like a pig in a slaughter-chute,

thinking he's gonna die. The guards scramble, drawing their

clubs--as Billy strokes Percy's hair and whispers in his ear:

BILLY

Ain't you sweet. Soft. Like a

girl. I druther fuck your asshole

than your sister's pussy, I think.

Billy kisses Percy's ear--and his hand drops down to squeeze

Percy's crotch. Paul pulls his sidearm, taking aim...

PAUL

Wharton!

...and Billy lets go, stepping back with his hands raised,

laughing. Percy darts across the Mile in terror and cringes

against the cell opposite, breathing so loud and fast it

almost sounds like sobbing.

BILLY

I let 'im go, I'us just playin'

and I let 'im go! Never hurt a

hair on his purty head!

(grins at Percy)

Your noodle ain't limp at all,

loverboy! I think you sweet on ol'

Billy the Kid...

(sniffs his fingers)

...oooh, but smell you.

Down at his cell, Del starts laughing shrilly. Everybody else

starts to realize it, including Percy himself...he looks

down, sees the huge dark stain spreading at his crotch.

DEL

Lookit, he done piss his pants!

Look what the big man done! He

bus' other people wid 'is stick,

mais oui some mauvais homme, but

someone touch him, he make water

in his pants jus' like a baby!

Percy just stares. Brutal shoves Delacroix into his cell.

BRUTAL

Shut up, Del.

Paul steps to Percy, puts a hand on his shoulder. Percy

shakes his hand off, looks around at their faces, whispers:

PERCY

You talk about this to anyone,

I'll get you all fired. I swear

that to God.

PAUL

What happens on the Mile, stays on

the Mile. Always has.

The men nod solemnly. Nobody's going to talk about this.

Percy looks at Delacroix still snorting in his cell, points

at him.

PERCY

You keep laughing, you French-

fried faggot. You just keep

laughing.

Del falls silent. Percy turns and storms away as we

FADE TO BLACK

IN BLACKNESS, A TITLE CARD APPEARS:

"The Bad Death of Eduard Delacroix"

CUT TO:

INT. DEL'S CELL - DAY

Paul is sitting with Delacroix. Brutal is leaning against the

bars. Del is throwing the spool. Mr. Jingles is fetching it.

The silence is thick. Just the clack-clatter of the spool,

and the skitter skitter of tiny mouse paws on concrete. It's

getting on Paul's nerves in a big way. Softly:

PAUL

What about Dean? He's got a little

boy would love a pet mouse, I bet.

Del looks horrified at the thought.

DEL

How could a boy be trust wid Mr.

Jingles? Maybe forget to feed him.

And how he keep up wid his

trainin', just a boy, n'est-ce pas?

Del tosses the spool again--clack-clatter, skitter-skitter.

PAUL

All right, I'll take him.

DEL

T'ank you kindly, merci beaucoup,

but you live out in the woods, and

Mr. Jingles, he be scared to live

out dans la foret.

PAUL

He whisper that in your ear?

Del nods, tosses the spool again--clack-clatter, skitter

skitter. Paul is completely out of ideas. But then:

BRUTAL

How about Mouseville?

DEL

Mouseville?

BRUTAL

Tourist attraction down in

Florida. Tallahassee, I think. Is

that right, Paul? Tallahassee?

PAUL

(level)

Yeah, that's right. Tallahassee.

Just down the road apiece from the

dog university.

Brutal's mouth twitches, but he manages to keep a straight

face. He gives Paul a look--don't blow this.

BRUTAL

You think they'd take Mr. Jingles?

You think he's got the stuff?

PAUL

Might. He's pretty smart.

DEL

Hey! What dis Mouseville?

BRUTAL

Tourist attraction, I said. They

got this big tent you go into--

DEL

Like a cirque? You have to pay?

BRUTAL

You shittin' me? Course you pay.

Dime a piece, two cents for the

kids. And inside the tent there's

this mouse city made out of boxes

and toilet paper rolls...

Percy is drifting up the block, listening too, but nobody's

really paying him much mind.

BRUTAL

...plus they got the Mouseville

All-Star Circus. There's mice that

swing on trapeze, mice that roll

barrels, mice that stack coins...

DEL

Dat's it! Dat's da place for Mr.

Jingles! You gonna be a circus

mouse after all! Gonna live in a

mouse city down in Florida!

Del tosses the spool extra hard--it takes a bad bounce off

the wall and goes clattering through the bars onto the Mile.

The mouse goes after it like a shot, too intent to notice:

His old enemy Percy.

BRUTAL

Percy, no!

Percy stomps the heel of his heavy work shoe down on Mr.

Jingles. There's a SOFT SNAP as the mouse's back breaks.

Del screams in horror and throws himself at the bars, sobbing

the mouse's name. Percy looks to Brutal and Paul, smiles.

PERCY

Knew I'd get him sooner or later.

Just a matter of time, really.

He turns and strolls up the Mile, leaving Mr. Jingles dying

in a tiny pool of blood. Up at the duty desk, Dean and Harry

get up from a cribbage game, stunned and furious.

Percy strolls past, exits to the execution chamber. Del is

still screaming, all his pent-up terror and grief pouring out

at the dying mouse. And then comes a soft, urgent voice:

COFFEY

Give'm to me.

They turn. Coffey's got his arms out through his bars, one

massive hand spread open.

COFFEY

Give'm to me. Might still be time.

Paul hesitates, scoops the mouse up off the floor, wincing at

the feel of it. Splintered bones are poking at the hide.

BRUTAL

What are you doing?

Paul doesn't answer, just lays Mr. Jingles into Coffey's

hand. Coffey pulls the mouse in through his bars and lays his

other hand gently over it, cupping the creature. All we see

now is the tail hanging out the side, twitching weakly.

BRUTAL

Paul, what the hell--

Paul motions him quiet. Del is pleading softly at his bars:

DEL

Please, John. Oh Johnny, help him,

please help him, s'il vous plait.

Harry and Dean join the group. Everybody watching now.

Coffey puts his mouth to his cupped hands, inhales sharply.

The world hangs suspended for a moment. Coffey raises his

face, contorting as if desperately ill, starts making those

horrendous choking sounds in his throat...

BRUTAL

(softly)

Oh, dear Jesus. The tail. Look at

the tail.

They do. The tail is no longer weak and dying. It's snapping

briskly back and forth, as if ready to play.

Coffey makes that retching/gagging sound...and again exhales

a cloud of swirling black "insects" from his nose and mouth.

The men watch, speechless, as the bugs turn white and

disappear.

Coffey bends down, opens his hand. Mr. Jingles bounds off his

fingers through the bars, racing past the guards' feet. They

turn to see Del gather the mouse up, laughing and crying.

Dean turns back to Coffey with a stunned whisper:

DEAN

What did you do?

COFFEY

I helped Del's mouse. He a circus

mouse. Goan live in a mouse city

down in...down in...

BRUTAL

(numb)

Florida?

Coffey nods, remembering.

COFFEY

Boss Percy's bad. He mean. He step

on Del's mouse.

(softly)

I took it back, though.

And with that, he lies back on his bunk and faces the wall.

The others look to Paul, don't even know what to say.

PAUL

Brute, come along with me.

(to Harry and Dean)

You fellas go on back to you

cribbage game.

Harry nods numbly. Paul leads Brutal up the Mile...

EXECUTION CHAMBER

...and they enter to find Percy polishing Old Sparky's arms.

PERCY

Don't start in on me. It was just

a mouse. Never belonged here in

the first place.

PAUL

The mouse is fine. Just fine.

You're no better at mouse-killing

than anything else around here.

PERCY

You expect me to believe that? I

heard the goddamn thing crunch.

Paul steps closer, angry as we've ever seen him:

PAUL

Aren't you glad Mr. Jingles is

okay? After all our talks about

how we should keep the prisoners

calm? Aren't you relieved?

PERCY

What kind of game is this?

PAUL

No game. See for yourself.

Beat. Percy stalks past them, heads out onto the Mile. Paul

and Brutal just wait, saying nothing. Brutal picks up the rag

left by Percy, resumes polishing chores on Old Sparky. Paul

stretches, cracks his neck. The silence heavy...

...until Percy reappears.

PERCY

You switched them! You switched

them somehow, you bastards!

BRUTAL

I always keep a spare mouse in my

wallet for occasions such as this.

PERCY

You're playing with me, the both

of you! Just who the hell do you

think you are--

Brutal grabs him , slams him bodily into the electric chair.

Paul bends close, gets right in Percy's face.

PAUL

We're the people you work with,

Percy, but not for long. I want

your word.

PERCY

My word?

PAUL

I put you out front for Del, you

put in your transfer to Briar

Ridge the very next day.

PERCY

What if I just call up certain

people and tell them you're

harassing me? Bullying me?

PAUL

Go ahead. I promise you'll leave

your share of blood on the floor.

PERCY

Over a mouse? You think anyone's

gonna give two shits?

PAUL

No. But four men will swear you

stood by while Wild Bill tried to

strangle Dean to death. About that

people will care, Percy. Even your

uncle the governor will care.

BRUTAL

Thing like that goes in your work

record. Work record can follow a

man around a long, long time.

Percy looks from one man to another, knowing he's trapped.

PAUL

I put you out front, you put in

your transfer. That's the deal.

Percy thinks it over, nods. He tries to get up, but Paul keep

him pinned...and pointedly offer his hand.

PAUL

You make a promise to a man, you

shake his hand.

Percy hesitates, shakes Paul's hand...

HIGH WIDE ANGLE OF EXECUTION CHAMBER

...and Paul pulls him out of the electric chair as we

DISSOLVE TO:

SAME ANGLE AS ABOVE - NEXT NIGHT

Witnesses are trickling in, filling the seats. A storm is

brewing, sending FLASHES OF LIGHTNING across the floors.

INT. DEL'S CELL - NIGHT

Del sits with Mr. Jingles in his lap, stroking the mouse

between the ears. Paul, Brutal, and Harry appear at the bars.

DEL

Hey, boys. Say hi, Mr. Jingles.

PAUL

Eduard Delacroix, will you step

forward?

DEL

Boss Edgecomb?

PAUL

Yes, Del?

DEL

Don' let nothin' happen to Mr.

Jingles, okay?

Paul nods--I promise. Del rises, steps to Paul.

DEL

Here, take him.

Del lifts his hand. Mr. Jingles steps off onto Paul's

shoulder with no hesitation. Gently:

PAUL

Del. I can't have a mouse on my

shoulder while...you know.

COFFEY

I'll take him, boss. Jus' for now.

If Del don' mind.

DEL

Yeah, you take 'im, John. Take him

til' dis foolishment done--bien!

(to Paul and Brutal)

After, you take him down to

Florida? To dat Mouseville?

BRUTAL

We'll do it together, most likely.

Maybe take a little vacation time.

Paul moves to Coffey's cell. The mouse skitters off Paul's

shoulder onto Coffey's hand.

DEL

People pay a dime apiece to see

him. Two cents for the kiddies.

Ain't dat right, Boss Howell?

BRUTAL

That's right, Del.

DEL

You a good man, Boss Howell. You

too, Boss Edgecomb. Wish I could'a

met you bot' someplace else.

Del gives Mr. Jingles one last look, starts to cry.

DEL

Au revoir, mon ami. Je t'aime, mon

petit.

And they start to walk the Mile...

EXECUTION CHAMBER

Sweltering in the damp heat. Rain is pissing down, drumming

the tin roof. People glance up uneasily as THUNDER BOOMS. A

FAT LADY is staring grimly at the electric chair.

FAT LADY

Hope he's good and scared. Hope he

knows the fires are stoked, and

that Satan's imps are waiting.

ANGLE ON DOOR

Del enters, horrified to see Percy waiting at Old Sparky.

Paul gives Del's arm a reassuring squeeze, leads him

forward...

IN A TIGHT SERIES OF SHOTS:

The clamps are applied. The straps are drawn tight.

PERCY

Roll on one.

The lights brighten on a RISING HUM. Witnesses look up.

ON THE MILE

Coffey looks up as the overheads flare hotter and hotter,

whispers to the mouse in his hands:

COFFEY

You be still, Mr. Jingles. You be

so quiet and so still.

RESUME EXECUTION CHAMBER

PERCY

Eduard Delacroix, you have been

condemned to die by a jury of your

peers, sentence imposed by a judge

in good standing in this state.

You have anything to say before

sentence is carried out?

Del tries to speak. Doesn't quite manage the first time.

Licks his lips and tries again.

DEL

I sorry for what I do. I give

anything to take it back, but I

can't. God have mercy on me.

(whispers to Paul)

Don' forget 'bout Mouseville.

Paul and Brutal nod--and are stunned as:

PERCY

No such place. That's just a fairy

tale these guys told you to keep

you quiet. Just thought you should

know, faggot.

The stricken look in Del's eyes tells us a part of him had

known all along. Paul and Brutal would both like to deck

Percy right about now, and he knows it--he gives them a "what

are you gonna do about it" smile.

Nothing they can do. Paul nods to Harry, who takes the black

mask from the back of the chair and rolls it down over Del's

head, leaving the top of his shaved head exposed.

PERCY

takes the sponge and bends down to the bucket of brine. The

other don't see it, but we do:

Percy only pretends to dip the sponge and soak it. It never

touches the water. He straightens up and places the sponge

atop Delacroix's head, hiding it with his hands.

The cap is lowered. Paul and the others haven't yet realized

what's happened. THUNDER BOOMS and LIGHTNING CRASHES as Percy

hides a smile, steps back to address the condemned:

PERCY

Electricity shall now be passed

through your body until you are

dead, in accordance with state

law. God have mercy on your soul.

TIGHT ON PAUL

as realization starts to dawn. He stares at the bucket, then

across the floor to Delacroix, coming to terms with the

evidence of his eyes--there's no water on the floor or

dripping down the sides of Del's neck.

Paul's eyes widen. A stunned beat of horror. He starts to

open his mouth to scream "NO!", but Percy beats him to it

with:

PERCY

Roll on two.

Van Hay flicks the switch. WHAM. The electricity hits home

and Del rocks forward, riding the current.

Then things start to go horribly wrong.

The HUMMING loses its steadiness and starts to waver with a

CRACKLING SOUND. Tendrils of smoke begin curling from under

the cap, a mixture of burning hair and sponge. Brutal shoots

Paul a horrified look. Paul responds with a harsh whisper:

PAUL

It's dry!

Delacroix begins twisting and jittering in the chair, his

masked face snapping violently from side to side, his legs

pistoning up and down in his restraints.

There's a MUFFLED POP from under the cap, like a pine knot

exploding in a hot fire. Smoke starts coming through the

fabric of the mask, puffing upward. Del is being cooked

alive. Paul spins to the partition, hollering--

PAUL

JACK!

--but Brutal grabs his arm, whispers fiercely:

BRUTAL

Don't you tell him to stop. Don't

you do it. It's too late for that.

Paul turns back, helpless. The other guards are trading wild

looks, unable to believe what's happening. Even Percy looks

aghast--he was expecting something, but not this.

Del begins SCREAMING--the wild, hysterical sound of an animal

being shredded alive in a hay baler. The HUMMING goes uneven

and ragged, the lights rising and falling...

ON THE MILE

...as Del's screams rise and fall with them, echoing up the

corridor. Coffey's shaking and screaming too, as if feeling

Del's pain. Mr. Jingles squirms out of his grasp and goes

squeaking in terror toward the restraint room door...

BILLY

HE'S COOKIN' NOW! THEY COOKIN' HIM

GOOD! NEAR ABOUT DONE, I RECKON!

RESUME EXECUTION CHAMBER

Wrong. Del's nowhere near about done. He's slamming back and

forth in the chair hard enough to shake the platform,

twisting hard against the leather restraints. We hear BONES

BREAKING. A WOMAN'S SCREAMS. Witnesses start rising to their

feet:

WITNESSES

What the hell's happening to

him?...Are those clamps going to

hold?...Christ, the smell!...Is

this normal?

The mask bursts into flame on Delacroix's face. Van Hay

hollers through the wire mesh, horrified:

VAN HAY

SHOULD I KILL THE JUICE?

PAUL

NO! ROLL, FOR CHRIST'S SAKE, ROLL!

Harry scoops up the bucket of water to throw it.

PAUL

No water! No water! You crazy?

Harry backs off with a look of dazed understanding--you don't

throw water on a man getting juiced. Right. He drops the

bucket, races to get the chemical fire extinguisher instead.

The flaming mask peels away, revealing Del's charring face.

His eyeballs are misshapen globs of burning white jelly blown

out of their sockets. The ATTENDING DOCTOR faints dead away.

Pandemonium now in the room. People shouting and hurrying to

exit, chairs falling over, women screaming:

FAT LADY

Stop it, stop it, oh can't you see

he's had enough?

Hal grabs Paul by the shoulder, spins him around.

HAL

Why don't you shut it down?

PAUL

He's still alive! You want me to

shut down while he's still alive?

Hal is horrified at the thought. Del is jittering and

screaming, rocking from side to side, smoke pouring from his

nostrils and mouth, his tongue sizzling purple-black.

The witnesses are crowding and shoving to get out, but the

back door is locked. All they can do is cluster there.

Paul sees Percy with his head turned away. He grabs him,

forces his head around.

PAUL

You watch, you son of a bitch!

Harry steps up, the extinguisher in his hands. Waiting. Del

finally slumps over. He still vibrating, but now it's just

the effect of current flowing through his body.

PAUL

Kill it!

Van Hay kills the current. The HUMMING DIES. Brutal grabs the

extinguisher from Harry, shoves it into Percy's hands.

BRUTAL

You do it. You're running the

show, ain't you?

Percy, sick and dazed, aims the extinguisher and hoses the

smoking corpse. Hal is near the back, calming the crowd:

HAL

It's all right, folks, it's all

under control. Just a power surge

from the storm, that's all,

nothing to worry about...

PAUL

Dean, get doc's stethoscope.

Dean drops to the doctor's bag, digs through it, hands up the

stethoscope. Paul plugs them into his ears. People are

moaning and sobbing at the back of the room:

MAN

Oh my God! Is it always like this?

Why didn't somebody tell me? I

never would have come!

Paul wipes some foam away from Delacroix's chest, places the

stethoscope pad to the raw flesh. He nods to Brutal--it's

over.

CUT TO:

INT. ACCESS TUNNEL - NIGHT

Paul and the others bring the stretcher down, lay the corpse

on the gurney. Percy starts stammering excuses:

PERCY

I didn't know the sponge was

supposed to be wet--

Brutal hauls off and slugs him. A scuffle ensues as the

others grab Brutal and pull him off.

PAUL

Brutal, no!

BRUTAL

What do you mean, no? How can you

say no? You saw what he did!

PAUL

Delacroix's dead, nothing can

change that, and Percy's not worth

it!

BRUTAL

So he just gets away with it? Is

that how it works?

Hal comes lunging down the stairs, furious:

HAL

What the fuck was that? Jesus

Christ, three witnesses puked all

over the floor up there! And the

smell! I got Van Hay to open both

doors, but that smell won't come

out for five damn years, that's

what I'm betting! And that asshole

Wharton is singing about it! I can

hear him!

PAUL

(quietly)

Can he carry a tune, Hal?

This pulls the plug on the moment--Hal snorts, triggering

laughter among the men, a wild release of tension and fear.

Everybody starts feeling a bit saner again as it dies down:

HAL

Okay, boys. Okay. Now what the

hell happened?

All eyes go to Percy. Hal turns, sees Percy's bloody lip.

HAL

Percy? Something to say?

PERCY

I didn't know the sponge was

supposed to be wet.

Beat. A look of utter contempt from Hal.

HAL

How many years you spend pissing

on the toilet seat before somebody

told you to put it up?

PAUL

Percy fucked up, Hal. Pure and

simple.

HAL

Is that your official position?

PAUL

Don't you think it should be?

Hal considers it, nods.

PAUL

He'll be putting in a transfer

request to Briar Ridge tomorrow.

Moving on to bigger and better

things. Isn't that right, Percy?

Percy nods. Hal steps close, gives him a tight, icy smile.

HAL

You're a little asshole, and I

don't like you a bit.

(off Percy's look)

Have that transfer request on my

desk first thing.

Hal heads back up the stairs. Brutal shoves Percy aside and

wheels Delacroix's body down the tunnel.

INT. E BLOCK - NIGHT

Paul returns to find Wild Bill making up a song in his cell:

BILLY

(singing)

Barbecue! Me and you! Stinky,

pinky, phew-phew-phew! Weren't

Billy or Jilly or Hilly or Roy--it

was a French-fried faggot named

Delacroix!

PAUL

You're about ten seconds away from

spending the rest of your life in

the padded room.

Billy falls silent. Paul continues down the Mile to Coffey's

cell. Coffey's on his bunk, face streaked with tears. He

wipes his eyes with the heels of his hands like an exhausted

child.

COFFEY

Poor Del. Poor old Del.

PAUL

Yes. Poor old Del. John, are you

okay?

COFFEY

I could feel it from here.

PAUL

What do you mean? You could hear

it? Is that what you mean?

COFFEY

He's out of it now, though. He's

the lucky one. No matter how it

happened, Del's the lucky one.

Paul realizes he won't get a coherent answer.

PAUL

Where's Mr. Jingles?

COFFEY

(points vaguely)

Ran down there. Don't think he'll

be back.

(beat)

Awful tired now, boss. Dog tired.

Coffey lays down, turns to face the wall.

PAUL

Me too, John. Me too.

CUT TO:

INT. PAUL'S HOUSE - NIGHT

Paul enters in darkness, hangs his hat. He drifts into the

kitchen, clicks on the radio. SOFT MUSIC BEGINS: Gene Austin

singing "Did You Ever See A Dream Walking?"

He pours a drink at the kitchen table, takes a sip, lays the

glass down. Jan sleepily appears from the darkness behind

him, entering the kitchen. He realizes she's there, glances

back.

She can sense the weight on his soul. She comes to him, folds

his head into her arms. They stand that way, he drawing

strength and she giving it, as the music plays on...

DISSOLVE TO:

SEQUENCE WITH MUSIC:

INT. CHURCH - MORNING

CAMERA TRACKS the pews to find Paul and Jan seated together

in the congregation, voices raised in hymn...

EXT. COUNTRY ROAD - MORNING

Paul's Model T comes sputtering up the road. He and Jan are

taking a drive, still in their Sunday best...

EXT. HAL'S HOUSE - MORNING

Paul and Jan wait at the front door. Jan holds a baking dish.

PAUL

I hate this.

JAN

I know.

The door opens. Hal, looking tired, ushers them inside...

EXT. BACKYARD - MORNING

...and they walk outside to find MELINDA MOORES sitting in

the sun, frail and wasted, a blanket on her knees. She'd be

beautiful if not for the cancer killing her.

Paul is shocked at her appearance, hides it as best as he

can. Jan covers this for him--she drops to Melinda's side

with a warm smile and a kiss, takes the woman's frail hands

in hers.

Paul catches Jan's eye. The look he gives her says it all--I

don't know what I'd do without you...

DISSOLVE:

...and we find Paul and Hal talking quietly over beers while

the women visit b.g.:

HAL

She's having one of her good days.

I thank God for that.

PAUL

What a bad day?

HAL

(beat)

Sometimes she's...not herself

anymore. She swears.

PAUL

Swears.

HAL

It just pops out, the most awful

language you can imagine. She

doesn't even know she's doing it.

I didn't know she'd ever heard

words like that...and to hear her

say them in her sweet voice...

(gazes off)

I'm glad she's having a good day,

Paul. I'm glad for you and Jan.

DISSOLVE TO:

INT. PAUL'S BEDROOM - NIGHT

Paul is wide awake, staring at the dark. Jan can sense him

brooding. She rolls over sleepily.

JAN

Honey? If you don't say what's on

your mind, I'm afraid I'll have to

smother you with a pillow.

PAUL

I'm thinking I love you. I'm

thinking I don't know what I'd do

if you were gone.

JAN

Oh.

PAUL

(beat)

I'm also thinking I'd like to have

the boys over tomorrow.

Off Jan's look, we

CUT TO:

INT. DINING ROOM- DAY

Brutal, Harry, and Dean are seated at the table with Paul and

Jan. Serving plates are being passes, everybody digging in:

THE MEN

(various, ad-lib)

Ma'am, you sure know how to fry up

some fine chicken...Brutal, don't

hog the taters now...Try that corn

yet? It's something special...

Paul softly interjects:

PAUL

You saw what he did with the mouse.

This stops everybody cold. Dean puts his chicken down, wipes

his hands. Looks are traded in the silence.

BRUTAL

I could'a gone the rest of the day

without you bringing that up.

DEAN

I could'a gone the rest of the

year.

PAUL

He did it to me too. He put his

hands on me and took my bladder

infection away.

The men absorb this. Brutal glances to Jan.

JAN

When he came home, he was...all

better.

DEAN

You're talking about an authentic

healing. A praise-Jesus miracle.

PAUL

I am.

BRUTAL

If you say it, I accept it. But

what's it got to do with us?

Jan looks to Paul, realization starting to dawn:

JAN

Melinda? Oh, Paul...

BRUTAL

Melinda? Melinda Moores?

Paul nods--that's who we're talking about.

JAN

You really think you can help her?

PAUL

It's not a bladder infection, or

even a busted-up mouse. But there

might be a chance.

HARRY

Hold on now. You're talking about

our jobs. Sneak a sick woman onto

a cellblock?

PAUL

Hal would never allow that. You

know him, he wouldn't believe

something unless it fell on him.

BRUTAL

So you're talking about taking

John Coffey to her. That's more

than just our jobs, Paul.

DEAN

Damn right. That's prison time if

we get caught.

HARRY

Let's not discuss this like it's

even an option. Brutal, help me

out here...

Brutal lets out a deep breath, considering. He looks to Paul.

BRUTAL

I'm sure she's a fine woman...

JAN

The finest.

PAUL

What's happening to her is an

offense, Brutal. To the eyes and

the ears and the heart.

BRUTAL

I have no doubt. But we don't know

her like you and Jan do...do we?

PAUL

That's why it's a lot to ask.

HARRY

It is. Let's not forget Coffey's

a murderer. What if he escapes?

I'd hate losing my job or going to

prison, but I'd hate having a dead

child on my conscience even more.

PAUL

I don't think that'll happen...

(beat, softly)

...in fact, I don't think he did

it at all.

The men are stunned by this. Off their looks:

PAUL

I just can't see God putting a

gift like that in the hands of a

man who would kill a child.

DEAN

Well, that's a tender notion, but

the man's on death row for the

crime. Plus, he's huge. If he

tried to get away, it'd take a lot

of bullets to stop him.

BRUTAL

We'd all have shotguns in addition

to sidearms. I'd insist on that.

(to Paul)

He tried anything, we'd have to

take him down. You understand.

PAUL

I understand.

BRUTAL

(beat)

So. Tell us what you had in mind.

FADE TO BLACK

IN BLACKNESS, A TITLE CARD APPEARS:

"Night Journey"

CUT TO:

INT. INFIRMARY BUILDING/DISPENSARY - NIGHT

A FLASHLIGHT BEAM plays across a glass cabinet, scanning the

contents. The beam pauses. A hand enters frame, unlocks the

cabinet, pulls out a bottle of morphine tablets...

...and WE ANGLE TO Brutal as he shakes half a dozen pills

onto his palm, pockets them, replaces the bottle on the

shelf. He turns and slips five bucks to a NIGHTSHIFT ORDERLY.

BRUTAL

I was never here.

ORDERLY

Shit, for five bucks, you was

never nowhere.

INT. E BLOCK ACCESS TUNNEL - NIGHT

A MORPHINE PILL is being crushed to powder on the stainless

steel gurney. TILT UP to Paul crushing the pills. Brutal

carefully scrapes the powder onto a small sheet of paper...

INT. PAUL'S INNER OFFICE - NIGHT

Percy is parked in Paul's chair with his feet up, reading a

book titled: "CARING FOR MENTAL PATIENTS."

INT. E BLOCK - NIGHT

Harry and Dean are playing cards at the duty desk, tension

thick, cards slapping softly as the seconds tick by. Paul and

Brutal finally show up toting bottles of RC cola:

BRUTAL

Fellas thirsty? Fresh out of the

icebox.

DEAN

Oh, thanks. That's swell.

HARRY

Yeah, hot in here.

They begin popping the caps off, swigging cola. The sound of

it brings Billy to his bars.

BILLY

Hey. Hey, I'm'a get some too.

BRUTAL

My ass you get some too.

PAUL

You think you deserve any?

HARRY

(checks a clipboard)

Day report says he's been okay.

BILLY

Hell, yes, I been behaved. C'mon,

now, don't be stingy hogs.

Paul shrugs to Brutal--why not? Brutal pops the top off a

bottle, passes it to Paul. Paul grabs a tin cup, sets it on

the desk...and we see it contains the morphine powder. He

pours the cola, swirls it around...

ANGLE THROUGH COFFEY'S BARS

...as Coffey looks up, sensing something happening. He peers

up the Mile as Paul walks to:

BILLY'S CELL

Billy reaches for the cup, but Paul keeps it out of reach.

PAUL

You gonna stay behaved?

BILLY

C'mon, you clunk, gimme that.

PAUL

You promise me, or I'll drink it

myself right here in front of you.

BILLY

C'mon now, don't be that way. I be

good.

Paul lets him take the cup. Billy knocks it back, draining it

in three huge swallows. He lets out an awesome belch.

PAUL

Cup.

BILLY

We'll break out the fire hose and

take it anyway. And you will have

drunk your last R.C. cola. Unless

they serve 'em down in hell.

Billy's smile fades. He hands the cup through the bars. Paul

takes it, turns and heads back to--

THE DUTY DESK

--where Brutal, Harry, and Dean have been watching the entire

exchange with their hearts in their throats...

DISSOLVE:

...and we find Billy staring glassy-eyed at the ceiling. He

keels over on his bunk. ANGLE to Paul and Brutal stepping to

the bars with Harry and Dean.

PAUL

Anybody wants to back out, now's

the time. After this, there's no

turning back.

(off their looks)

So? We gonna do this?

A voice comes softly from down the way:

COFFEY

Sure. I'd like to take a ride.

Their heads come slowly around, staring at Coffey in shock.

BRUTAL

(to Paul)

Guess were all in.

INT. PAUL'S OFFICE - NIGHT

Percy looks up from his book as the door opens. Paul enters

with Brutal and Harry, ominously hemming the desk.

PERCY

What is this?

Paul pulls the canvas straitjacket from behind his back.

PAUL

Payback.

Percy jumps up and tries to the execution chamber, but Harry

grabs him, spins him back. A wild scuffle ensues as:

PERCY

Let go of me! Let go!

PAUL

Settle down, Percy!

Percy tries to jerk away, crashes into the desk. The book he

was reading falls to the floor--

--and a "Tijuana Bible" is revealed within the pages. It's a

pornographic cartoon book of the type popular in the '30's,

featuring crude drawings of famous cartoon characters or

movie stars engaged in outlandish sexual acts. This one has

Olive Oyl getting it doggy-style from Popeye. The word

balloon over his head features his famous laugh: "Uk-uk-uk-

uk!"

BRUTAL

Oooo, Poicy! What would your

mother say?

PERCY

Let go, you ignoramus! I know

people! Big people!

PAUL

So you've said. C'mon, stick out

your arms like a good boy.

PERCY

I won't. And you can't make me.

BRUTAL

You're dead wrong about that, you

know.

Brutal grabs Percy by the ears, twisting hard. Percy lets out

a shriek--not just of pain, but a dismayed understanding that

he's not going to bluster his way out of this one.

BRUTAL

You gonna put your arms up? I'll

rip your ears off. Use 'em for tea

caddies. You know I will.

PAUL

The man's ripping your ears off,

Percy. I'd do as he says.

Percy jerks his arms up before him. They get the straitjacket

on him within seconds. Percy turns to Paul on the verge of

tears. Softly:

PERCY

Please, Paul. Don't put me in with

Wild Bill. Please.

PAUL

You would think that.

Paul gives him a hard, angry shove...

INT. E BLOCK - NIGHT

...and they bring him down the Mile to the restraint room

door. Brutal takes Percy's holster and baton.

BRUTAL

You'll get 'em back, don't worry.

PERCY

That's more than I can say about

your jobs. All your jobs! You

can't do this to me! You can't!

Paul steps forward with a roll of strapping tape.

PAUL

Let you in on a little secret. We

can and we are.

He slaps the tape over Percy's mouth and shoves him back into

the restraint room. Percy stands breathing heavily through

his nose, making muffled mmmmph-mmmph! sounds under the tape.

PAUL

You're going to have a few hours

of quiet time now, so you can

reflect on what you did to Del.

BRUTAL

(grins)

If you get lonely, think about

Olive Oyl...

(thrusting his hips)

...uk-uk-uk-uk!

And they slam the door, shutting Percy into darkness.

A WALL-MOUNTED GUN SAFE

is unlocked, shotguns pulled out. The men load up, heading

down the Mile as:

PAUL

One more time--what do you say if

somebody comes by?

DEAN

Coffey got upset, so we put him in

the restraint room. They hear any

noise, they'll think it's him.

They come to Coffey's cell.

COFFEY

We goan for the ride now?

PAUL

That's right.

The cell is unlocked. Coffey emerges. Paul motions them

along, still grilling Dean:

PAUL

What about us?

DEAN

You're over in Admin, going over

Del's file. Brutal and Harry are

in the laundry doing their wash--

A skinny white arm suddenly shoots out from Wild Bill's cell

and grabs Coffey by the wrist. The men gasp, shocked to see

Billy on his feet, grinning and weaving like a punch-drunk.

Coffey's reaction is beyond simple surprise; he's actually

trembling at Billy's touch as if some electrical circuit were

engaged. His eyes are wide and horrified, as if he'd just put

his hand in a basket full of snakes. He tries to pull away,

but Billy has him tight, that mysterious circuit blazing.

BILLY

(slurring wildly)

Where you fink you're goin'?

Coffey responds softly, with utmost horror:

COFFEY

You're a bad man.

BILLY

S'right, nigger. Bad as you'd want.

Paul plucks Billy's hand off Coffey's arm--and Coffey

flinches back as the circuit is broken.

BILLY

Whooeee. Whole room's spinning.

Like I'm shit-ass drunk. I have me

some shine or what?

He turns and staggers back to his bunk, muttering all the way:

BILLY

Niggers oughtta have they own

'lectric chair. White man oughtn't

havta sit in no nigger 'lectric

chair, nossir...

He goes face-first onto his bunk. Coffey is still staring.

COFFEY

He's a bad man.

INT. EXECUTION CHAMBER - NIGHT

Coffey is brought in...and freezes in horror at the sight of

Old Sparky. A whisper:

COFFEY

They're still in there. Pieces of

them, still in there. I hear them

screaming.

All eyes go to the electric chair. It sits shrouded in shadow

like an ominous throne. Never before has this place felt so

haunted to the men. It makes the hairs on the neck stand up.

PAUL

John, come along! Right now,

y'hear? C'mon! Toward that door!

Coffey finally responds, pulling away...

INT. E BLOCK ACCESS TUNNEL - NIGHT

...and they come down the steps. They realize Coffey will

have to stoop all the way down the tunnel. Paul pats the

gurney.

PAUL

Lie down on this.

(off Coffey's look)

It'll be easier for you and no

harder for us.

Coffey eases carefully onto the gurney, lying on his back.

His knees hang over the edge and his toes touch the ground,

but it works. They push him along, traversing the pools of

light.

Coffey actually starts to smile. He reaches out his arms,

fingertips touching the tunnel walls as they go by.

COFFEY

Say. This is fun.

EXT. PRISON WALL - NIGHT

A massive iron door SQUEALS open onto a little-used fenced

enclosure. Paul and the others bring Coffey up from the

tunnel below, emerging into the night. Coffey's breath

catches as he gazes wondrously up at the stars, pointing:

COFFEY

Look, boss! It's Cassie, the lady

in the rocking chair!

PAUL

Shhh. John, you have to be quiet

now.

COFFEY

(whispering)

You see her? You see the lady?

BRUTAL

We see her, John.

Harry goes first, hugging the shadows as he pulls his keys to

unlock the gate...

WIDE SHOT OF PRISON

...while TOWER GUARDS huddle in their enclosure atop the

walls. An occasional SPOTLIGHT cuts the darkness. FIREFLIES

dance in the fields and trees as far as the eye can see.

Four dark figures detach from the shadows, hurrying across

the lonely country road into the fields on the far side...

EXT. WOODS - NIGHT

Coffey's hand scoops up some fallen leaves. TILT UP to his

face as he crunches them under his nose, inhaling their smell.

He see the guards throwing him anxious looks. He misreads

this, holds out his hand so they can smell too. They do it,

just to make him happy.

PAUL

C'mon, big boy, keep moving.

A FEW FIREFLIES come winking through frame as the group

presses on...

ANOTHER AREA/WOODS

The trees are growing sparser, opening onto fields. MORE

FIREFLIES are flitting into view, trailing in their wake...

BRUTAL

How far is it?

HARRY

Just up ahead...

Harry brings them to a thicket of trees. They start removing

branches and boughs, uncovering a battered old FARMALL TRUCK

hidden in the brush.

The men pause. Even more fireflies are swirling around them,

growing in number. It's getting downright weird.

Coffey laughs softly, drawing their attention. A childlike

smile has utterly transformed his face. He raises his hand,

letting a firefly weave playfully in and out of his fingers.

COFFEY

Hey there, little firefly. Where's

Mrs. Firefly this evening?

Another firefly joins the first, both now dancing and

blinking around his fingers. Coffey laughs again.

COFFEY

Oh, there you is. You come out to

play too?

The men stand gaping. The fireflies are flitting to Coffey as

if to a beacon. He waves his hands slowly, fireflies blinking

and trailing from his fingertips like magic dust.

They begin orbiting his shiny bald head like tiny glowing

planet orbiting a sun, their light kicking a mellow sheen off

his ebony skin. Coffey's eyes meet Paul's.

PAUL

They seem...drawn to you.

COFFEY

I love 'em, is why. They don't

think no hurtful thoughts. They's

just happy to be. Happy little

lightning bugs...

The men don't know whether to be enchanted or terrified.

Harry gives Paul a look--can we go? Please?

PAUL

C'mon, big boy. Upsy-daisy.

Coffey clambers up on the stakebed. Paul and Brutal join him.

Harry gets in behind the wheel, jabs the starter button...

ON THE STAKEBED

...while Coffey sits with his back to the cab.

PAUL

John? Do you know where we're

taking you?

COFFEY

Help a lady?

PAUL

That's right. Help a lady. But how

did you know?

COFFEY

Dunno. Tell the truth, boss, I

don't know much'a anything. Never

have.

The truck pulls out. Coffey waves as the fireflies get left

behind, dwindling away like stars.

COFFEY

Bye, fireflies. Bye.

WIDE ANGLE OF COUNTRYSIDE

The truck rumbles from the fields onto a dirt road, countless

fireflies swirling in its wake...

DISSOLVE TO:

EXT. MOORES HOUSE - NIGHT

Headlights come over the rise. The truck appears, rumbling

down toward the house. The world is isolated and still.

IN THE TRUCK CAB

Harry stops and cuts the engine, leaving the headlights on.

Silence now, save for the trilling of crickets.

IN THE STAKEBED

Paul and Brutal both look terrified now that they're actually

here. An urgent whisper:

BRUTAL

We can still turn back.

Paul hesitates, wanting to do just that, but:

COFFEY

Boss, look. Someone's up.

Lights are coming on inside the house. Coffey rises and steps

down from the truck, pulling Paul along. Brutal follows them.

BRUTAL

This is a mistake. Christ, Paul,

what were we thinking?

PAUL

Too late now. Harry, keep John

here until we call you.

Paul and Brutal walk to the front door as the lights inside

the house keep clicking on. The last one finally comes on

over the stoop, the front door opens a crack...and the twin

barrels of a shotgun poke out into the night.

HAL

Who the hell goes there at two-

thirty in the goddamn morning?

PAUL

Hal, it's us! It's Paul and

Brutal--it's us!

The door swings wider, revealing Hal's face gaunt and haggard

in the yellow porch light, stunned to see them:

HAL

Paul, what are you doing here at

this hour? Jesus, it's not a

lockdown, is it? Or a riot?

PAUL

Hal, God's sakes, take your finger

off the trigger...

Hal doesn't, aiming past them at the truck in the yard.

HAL

Are you hostages? Who's out there?

Who's by that truck?

Coffey steps into the glare of headlights with Harry tugging

on his arm, trying to hold him back. Hal cocks both hammers.

HAL

John Coffey! Halt! Halt right

there or I shoot!

His aim wavers as a woman's voice comes from upstairs:

MELINDA (O.S.)

Hal? Who are you talking to, you

fucking cocksucker?

A frozen moment. Hal mortified. Paul gives him a look--is

that Melinda?

Hal's shotgun shifts back to Coffey--but Paul steps in front

of the muzzle.

PAUL

No one's hurt. We're here to help.

HAL

Help what? I don't understand. Is

this a prison break?

PAUL

I can't explain what it is. You

just have to trust me.

Coffey comes up the steps, brushes Paul aside, stops before

the warden. Hal blinks, his thoughts suddenly fuzzy--it's

that benign hypnotic effect Coffey has.

HAL

What do you...want?

MELINDA

Hal! Make them go away! No

salesmen in the middle of the

night! No Fuller brushes! No

French knickers with come in the

crotch! Tell them to take a flying

fuck in a rolling d...d...

We hear the sound of GLASS BREAKING, then she begins to sob.

COFFEY

(a whisper)

Just to help. Just to help, boss,

that's all.

HAL

You can't. No one can.

Coffey pulls the shotgun gently from Hal's grasp, hands it to

Paul. Coffey moves past Hal into the house...

INT. HOUSE - NIGHT

...and comes up the hallway toward the stairs.

HAL

Don't you go up there! Don't you

do it!

COFFEY

Boss, you just be quiet now and

let me be.

Coffey mounts the stairs with the others at his heels,

heading up toward that quavering voice:

MELINDA (O.S.)

Stay out of here! Whoever you are,

just stay out! I'm not dressed for

visitors, you rat's asshole!

INT. BEDROOM - NIGHT

Coffey enters, trailed by the others. Paul pauses, horrified.

The woman propped in bed barely resembles Melinda Moores

anymore--she looks made up like a Halloween witch, her livid

skin hanging in a loose trail of wrinkles, one corner of her

mouth twisted. Yellowish bile stains her chin and the front

of her nightgown. Her hair has gone white and straw-like, her

eyes glowering at Coffey with lively, irrational interest:

MELINDA

Oh, so big! Pull down your pants!

Let's have a look!

Hal groans with despair. Coffey just stands there for a

moment, watching her from a distance, then approaches the

bed...

MELINDA

Don't come near me, pigfucker.

...but as he draws closer, a change occurs. Her features

soften, her eyes become more sane and aware.

MELINDA

Why do you have so many scars? Who

hurt you so badly?

COFFEY

Don't hardly remember, ma'am.

Coffey sits on the edge of the bed. The lights seem to flare

hotter and brighter. Tears are forming in Melinda's eyes.

MELINDA

What's your name?

COFFEY

John Coffey, ma'am. Like the

drink, only not spelt the same.

She lays back, staring at him with shining fascination. The

world seems to be slowing down, growing very still indeed...

...and he starts bending slowly toward her.

COFFEY

Ma'am?

MELINDA

Yes, John Coffey?

COFFEY

I see it. I see it.

He comes closer...closer still...

COFFEY

You be still now. You be so quiet

and so still.

He brushes her forehead with his lips...the gentlest whisper

of a kiss...then moves his mouth down to hers. For a moment

we can see one of her eyes staring past him, filling with an

expression of surprise...

...and then her face is lost to view as Coffey puts his lips

on hers. We hear a soft whistling sound as he begins inhaling

the air deeply from her lungs. Something hot and glowing

starts passing between them, drawn on his breath...

The men watch. The house seems to shudder in that moment, as

if the entire world has shifted an inch to the right...

DOWNSTAIRS PARLOR

...and the grandfather clock stops ticking, the pendulum

stopping dead, the glass face cracking neatly up the center...

BEDROOM

...and a windowpane cracks. Then another. A picture falls off

the wall. A lightbulb bursts, showering glass.

Paul smells smoke, realizes the fringed coverlet of the bed

has caught fire. Moving like a man in a dream, he reaches for

the waterglass on the nightstand, douses the flames.

Coffey keeps kissing Melinda in that deep and mysterious way,

inhaling and inhaling, her hand held in his like a tiny white

bird. For a moment we actually hear something screaming, as

if some willful imp were being extracted by force...

...and then it's over. Coffey raises his head, revealing:

Melinda's beautiful face. Her mouth no longer droops. Color

is coming back to her hair. Her skin is shining with life.

Coffey regards her raptly for a moment or two, then starts

coughing violently.

He turns away and drops to his knees, hacking like a man in

the last stages of tuberculosis.

Paul and his men are expecting Coffey to spit out the "bugs",

but he doesn't--he just keeps coughing, deep and hard, barely

finding time to snatch in the next breath of air.

Hal goes to his wife, beyond stunned, sits at her side. She

looks back at him with amazement, her face like a dirty

mirror that's been suddenly wiped clean.

John's coughing grows even worse. Brutal drops to his side

and slaps his broad, spasming back.

BRUTAL

John! Sick it up! Cough 'em out

like you done before!

Coffey just keeps retching, eyes watering from the strain,

spit flying from his mouth.

BRUTAL

He's choking! Whatever he sucked

out of her, he's choking on it!

Paul starts toward them. Coffey crawls away, pressing himself

into a corner with his face against the wallpaper. He's still

making gruesome deep hacking sounds, but getting it under

control. He weakly waves Paul off--let me be.

Paul looks to the bed. Hal sits with Melinda, stroking her

brow. Color is blooming in her cheeks even as we watch.

MELINDA

How did I get here? We were going

to the hospital in Indianola,

weren't we? We stopped and you

bought me a packet of posies...

HAL

Shhh. It doesn't matter. It

doesn't matter anymore.

MELINDA

Did I have the X-ray? Did I

PAUL

Yes.

They both look at him.

PAUL

It was clear. There was no tumor.

Hal bursts into tears. Melinda sits up, comforting him. Her

eyes are drawn to the corner.

MELINDA

Who is that man?

Coffey is struggling to rise. Brutal does his best to help.

PAUL

John? Can you turn around? Can you

turn around and see this lady?

Coffey turns. His face is ashen gray, seriously ill.

MELINDA

What's your name?

COFFEY

John Coffey, ma'am.

MELINDA

Like the drink, only not spelled

the same.

COFFEY

No, ma'am. Not spelt the same at

all.

She pushes the covers aside to rise. Hal tries to stop her...

HAL

Melly, no...

...but she pushes his hand gently aside. Hal watches in

wonder as she stands, takes a first tentative step...and

walks to Coffey. She gazes up and touches his face.

MELINDA

I dreamed of you. I dreamed you

were wandering in the dark, and so

was I. We found each other. We

found each other in the dark.

She undoes her necklace, holds it up for him. He hesitates,

glances to Paul. Paul nods--it's all right. Coffey lowers his

head. Melinda affixes the delicate chain around his neck.

MELINDA

It's St. Christopher. I want you

to have it, Mr. Coffey, and wear

it. He'll keep you safe. Please

wear it for me.

COFFEY

Thank you, ma'am.

MELINDA

Thank you, John.

Her arms go around his neck, hugging him tightly as if she

might never let go.

EXT. MOORES HOUSE - NIGHT

Paul and the men hustle Coffey out the front door toward the

truck, helping him as best they can. He's weak as a baby,

knees threatening to give out at any moment.

PAUL

C'mon, John, stay on your feet.

HARRY

Christ, he goes down, we'll need

three mules and a crane to pick

him up again...

They get Coffey to the truck and throw their backs into it,

helping him crawl up onto the stakebed. He rolls over on his

back. Harry hops up, covers him with an old blanket. Brutal

pulls aside, speaking low:

BRUTAL

He'll never sit in Old Sparky. You

know that, don't you?

(off Paul's look)

He swallowed that stuff for a

reason. I give him a few days. One

of us'll be doing a cell check and

there he'll be. Dead on his bunk.

PAUL

If that's his choice, he's earned

it.

(beat)

Let's get him back on the Mile.

FADE TO BLACK

IN BLACKNESS, A TITLE CARD APPEARS:

"Coffey on the Mile"

CUT TO:

INT. E BLOCK - NIGHT

Dean starts babbling with relief as they return:

DEAN

Am I glad to see you! You were

gone so long! Wild Bill's making

noises like he's gonna wake up...

(notices Coffey)

What the hell's wrong with him?

BRUTAL

He's hurting, Dean. Hurting bad.

Dean jumps in, helps them steer Coffey into his cell.

PAUL

John, we're gonna set you on your

bunk now. Ready?

Coffey nods, sits heavily on the bunk. He lowers his head,

breath rasping like a rusted hinge. The guards step out.

DEAN

What about Mrs. Moores? Was it

like the mouse? Was it a...you

know...a miracle?

PAUL

Yes. Yes it was.

Paul scans their faces. Smiles are traded. An exultant beat.

HARRY

Damn. I think we got away with it.

BRUTAL

We still gotta convince a certain

somebody to keep his trap shut.

PAUL

Get his stuff.

Dean hurries off to retrieve Percy's holster and baton.

Brutal unlocks the restraint room door, swings it open. Percy

is revealed sitting against the wall, glaring, his mouth

still taped. Paul crouches down. Brutal joins him.

PAUL

I want to talk, not shout. I take

the tape off, you gonna be calm.

Percy nods. Paul takes hold of the tape, preparing to yank.

BRUTAL

My mother always said if you do it

fast, it won't hurt so much.

Paul rips the tape off. Percy's eyes water with pain.

BRUTAL

I guess she was wrong.

PERCY

Get me out of this nut-coat.

PAUL

In a minute.

PERCY

Now! Now! Right n--

Paul slaps him hard, knocks him sideways. Percy looks up,

blinking in surprise. Paul grabs him, yanks him back up.

PAUL

You shut up and listen. You

deserved to be punished for what

you did to Del. You'll accept it

like a man, or we'll make you

sorry you were ever born. We'll

tell people how you sabotaged

Del's execution--

PERCY

Sabotaged!

PAUL

--and how you pissed yourself like

a frightened little girl. Yes,

we'll talk, that's a given--but,

Percy, mind me now...we'll also

see you beaten within an inch of

your life.

Percy blinks, unable to grasp that.

PAUL

We know people, too, are you so

foolish you don't realize that?

People with friends and loved ones

doing time in this prison. People

who'd be happy to amputate you

nose or your penis just so someone

they care about could get an extra

three hours in the exercise yard

every week.

(off Percy's look)

Let bygones be bygones. Nothing's

hurt so far but your pride...and

nobody need ever know about that

except the people in this room.

BRUTAL

What happens on the Mile, stays on

the Mile. Always has.

A long pause. Softly:

PERCY

May I be let out of this coat now?

They pull him to his feet, undo the straps. He shrugs out of

the straitjacket and adjusts his clothes, trying to maintain

a shred of dignity.

PERCY

My things?

Dean hands them over. Percy smooths his hair and puts his hat

on, starts strapping on his holster belt.

PAUL

Think it over, Percy.

PERCY

Oh, I intend to. I intend to think

about it very hard. Starting right

now.

Percy exits the restraint room. Brutal whispers to Paul:

BRUTAL

He'll talk. Sooner or later.

Paul nods with weary resignation--yeah, I know.

ON THE MILE

Percy pauses near Coffey's cell, careless as always, getting

his holster buckled--and a massive black arm grabs him

through the bars. His SCREAM brings Paul and the others from

the restraint room.

Coffey's face is pressed so tight between his bars it looks

like he's trying to push his head through. He draws his lips

back, baring his teeth in an awful sneer...

Percy whacks him with his baton. Coffey barely seems to feel

it. He curls his free hand around the back of Percy's head,

pulling him ever closer...

...and Percy's screams are muffled as their mouths come

together. Coffey begins exhaling as if he'd held his breath

for hours. Percy jerks like a fish on a hook, but can't get

away. The men jump in, try to pry Percy loose, hollering for

Coffey to let him go.

The black "insects" are flowing from Coffey to Percy,

swirling into his mouth, up his nose, down his throat.

Several lightbulbs explode in their steel cages up and down

the Mile. Percy's baton drops from his nerveless fingers and

clatters to the floor, never to be picked up again.

And then Coffey steps back, rubbing his mouth as if he's

tasted something bad. The color has returned to his skin.

Percy, however, is ashen gray. His expression is blank as a

sheet of paper, not a trace of awareness in his eyes.

The men are stunned. Paul raises his hand to Percy's face,

snaps his fingers. Nothing. He tries again, clapping loudly.

Percy reacts slightly, eyes fluttering, swaying a bit.

PAUL

Easy, easy. You all right?

Percy says nothing. He turns and walks slowly up the Mile,

his movements vacant and disjointed. He comes to a swaying

stop at Wild Bill's cell...and turns slowly to look in.

Wild Bill is coming painfully around, groggily clutching his

head. He looks up, see Percy.

BILLY

What'a you looking at, you limp

noodle? You wanna kiss my ass or

suck my dick?

Nothing for the longest moment. Percy just staring...

...and then he pulls his gun and empties it into Wild Bill as

fast as he can pull the trigger. BAM!BAM!BAM!BAM!BAM!BAM!

Bill takes all six rounds in the chest, reeling back across

the cell. He hits the wall and slides down, leaving a smear,

his face registering a final look of stunned surprise.

Paul and the other tackle Percy and bring him down, wrestling

the gun out of his hand. Dean is almost weeping:

DEAN

Oh God, oh God, no...

Percy is flat on his back, staring up at nothing. The black

"bugs" come drifting out of nose and mouth, swirling in the

air over his head. They turn white and disappear.

The men are speechless. Paul turns, sees Coffey sitting on

the floor at his bars, watching.

COFFEY

Punished them bad men.

PAUL

Why Wild Bill? Why?

COFFEY

I saw in his heart. When he grab

my arm, I saw what Wild Billy

done. Saw plain as day. Can't hide

what's in your heart.

PAUL

What? Saw what?

Coffey reaches toward him, straining through the bars.

COFFEY

Take my hand, boss. You see for

yourself.

BRUTAL

Paul, no!

Paul hesitates, torn between reason and Coffey's pleading

eyes. A whisper:

COFFEY

My hand.

Paul can't help it. He has to. Their hands come together.

Paul lurches wildly as that circuit starts blazing between

them...

PAUL

No...please...

COFFEY

Gots to, boss. Gots to give you a

little bit of myself. A gift,

like. A gift of what's in me so

you can see...

...and Paul sees:

The Detterick twins. Kathe and Cora. Laughing and playing

hopscotch in the dust under a later afternoon sun...

A dinner table. Family having supper late in the day, basket

of biscuits being passed. Twelve year old Howie Detterick

taking it, passing it on...

An hand with a paint brush slopping bright red paint on the

side of a barn...

Kathe skipping to the head of the hopscotch squares, turning

and starting back, laughing in the sun...

The paint brush slopping more paint, dripping like blood...

Paul jerks and twists, trying to pull away, trying to break

the circuit, but he can't, not till all is seen and done:

Marjorie Detterick calling from the porch for everybody to

come eat, supper's ready...

A hammer pausing. Klaus looking down from atop the barn...

The Detterick twins finishing their hopscotch, gathering

their jump ropes from the dust, running across the yard...

The basket of biscuits being passed to little Cora, who takes

a biscuit and passes it on...

Klaus coming down the ladder, calling to his daughters. The

little girls running past the man with the paint brush, who

turns and smile as they go by...it's Wild Bill.

The basket of biscuits is passed one last time. A hand pulls

one out, raises it for a bite. It's Wild Bill, smiling at the

little girls as conversation flows around the table...

Paul screams, trying to pull away, but:

The porch door is kicked off its hinges just before dawn, a

figure looming in the doorway. Kathe wakes, her scream cut

short as the man's fist punches her hard in the face...

Paul trembles violently as if riding the lightning himself,

pleading for it to stop, but there's one last thing:

Wild Bill looms over the terrified little girls like a

horrendous boogeyman, whispers to Kathe:

BILLY

You lover your sister? You make

any noise, know what happens? I'll

kill her instead of you.

(to Cora)

And if you make any noise, I'll

kill her.

And he drags them out into the coming dawn...

...as Coffey lets Paul go. Paul is gasping, back in the real

world where his men are staring at him with wide eyes.

COFFEY

He kill 'em with they love. They

love for each other. You see how

it is?

Paul nods, numb. Tears are flowing down Coffey's face. Softly:

COFFEY

That's how it is ever' day. That's

how it is all over the worl'...

CUT TO:

WILD BILL

lies dead, staring with glassy eyes. A FLASHBULB POPS,

rimming him with harsh blue light...

INT. E BLOCK - DAWN

...as Hal arrives, wearing his pajama top under his overcoat.

He sees the POLICE PHOTOGRAPHER taking pictures. The guards

are giving statements to GROUPS OF COPS, everybody murmuring:

DEAN

...well, I dunno, he just snapped,

I guess...

HARRY

...s'right, one minute he's fine,

the next--blammo...

BRUTAL

...bastard grabbed him through the

bars a few days back, scared the

boy so bad he wet himself...

Hal turns, sees:

PERCY

sits handcuffed on the floor of the Mile, eyes glassier than

Wild Bill's. TWO COPS are trying to snap him out of it:

COP #1

Son! Son! Can you hear me?

COP #2

Speak up if you can hear us! We

gotta ask you some questions!

A MEDIC is raising Percy's eyelid with his thumb, shining a

penlight, getting no reaction.

MEDIC

I think this boy's cheese slid off

his cracker.

HAL

sees Paul, motions him aside to talk privately:

HAL

I'll cover you as much as I can,

even if it mean my job, but I have

to know. Does this have anything

to do with what happened at my

house? Does it, Paul?

Paul looks Hal in the eye. As with Bitterbuck, the lie comes

easy:

PAUL

No.

DISSOLVE TO:

INT. HOSPITAL ROOM - DAY

TRACKING A PAIR OF FEET shuffling into the room in hospital

slippers, escorted by TWO ORDERLIES. The patient is brought

to a window. The orderlies turn to leave...

...and we BOOM UP to reveal Percy, catatonic, staring out the

same window where we met Wild Bill...

EXT. HOSPITAL - DAY

...and we WIDEN SLOWLY from Percy at the window to reveal his

last stop in life. It's emblazoned on the gate: BRIAR RIDGE

MENTAL HOSPITAL. He finally got that transfer.

CUT TO:

EXT. PAUL'S HOUSE - DUSK

TIGHT ON PAUL as softly:

PAUL

It makes sense. I read the file.

Hal even said it himself. Wharton

rambled all over the state last

few years, causing trouble. Hell,

longer than that. Been at it since

he was ten. Vandalism. Petty

theft. Setting fires.

ANGLE SHIFTS to include Jan, Brutal, Harry and Dean. They're

in the brambly patch that borders the woods behind the house.

The sun is setting, turning the horizon fiery.

JAN

You saw him. You actually saw this

Wild Bill person take those girls.

PAUL

Their father hired him on for a

few days last spring, help repair

the barn. Cheap labor, just

another drifter...

BRUTAL

Only not.

PAUL

Sick bastard came back a month

later, just before dawn. Took the

girls...did what he did. Coffey

found them afterwards and tried to

help. It was too late.

JAN

(absorbs this)

Then you can stop it. The

execution, I mean. Get Coffey a

new trial.

PAUL

Based on what, honey? Some kind of

magical vision I had?

JAN

Show this farmer--what's his name,

Detterick?--show him a picture of

Wild Bill.

(off their looks)

Why not? If Wharton was there...if

the farmer can identify his

picture and they know he was

there...

BRUTAL

Him being there in May doesn't

mean he came back and killed those

girls in June. Even if he was

committing other crimes.

PAUL

They got their killer as far as

they're concerned.

Hell, Coffey's own lawyer would

come throw the switch if we let

him.

JAN

Then lie.

PAUL

Lie? About what?

JAN

Tell them Wharton confessed to the

crime. Brutus, you can back him

up, say you heard it too. You can

say that's what set Percy off. He

shot Wharton because he couldn't

stand thinking of what happened to

those two little girls, it snapped

his mind...

(seeing their looks)

...what? What now?

DEAN

We never reported anything like

that. We would've, too, everybody

knows it. It's part of our job.

BRUTAL

Besides, confessing don't make it

so. Slugs like Wild Bill lie about

everything. Crimes they committed,

women they had, even the weather.

JAN

But he was there! He painted their

barn! He ate dinner with them!

PAUL

All the more reason he might take

credit for the crime. He's gonna

fry anyway, so why not boast?

Jan stands thinking for a moment, then:

JAN

All right. Then you've got to get

John Coffey out on your own.

HARRY

Ma'am?

JAN

You did it once, didn't you? Only

this time, don't bring him back.

Dean blinks, stunned by this notion. Gently:

DEAN

Ma'am, your son's grown up and

moved away. My kids are just

starting kindergarten. Will you be

the one to explain to them why

their daddy's in prison?

JAN

Work out a plan. Make it look like

a real escape.

HARRY

Better be a plan an imbecile could

dream up. Nobody'd believe it

otherwise.

BRUTAL

Even if we did think of something,

it wouldn't do any good.

JAN

Why not? Just why the hell not?

PAUL

Because he's a six-foot-eight-inch

baldheaded black man with barely

enough brains to feed himself. How

long you think it'd be before he

was recaptured? Two hours? Six?

Jan swipes a tear away with the heel of her hand. Softly:

JAN

Do you mean to kill him, you

cowards? Do you?

Paul tries to take her hand. She wrenches away, furious.

JAN

Don't touch me! Next week this

time you'll be a murderer, no

better than that man Wharton, so

don't touch me!

She runs off toward the house, starting to sob as we

DISSOLVE TO:

INT PAUL'S KITCHEN - NIGHT

Paul is at the kitchen table in the wee hours, at his regular

place, sipping his beer. Irving Berlin's "Remember" PLAYS

SOFTLY on the radio. Jan comes down, looking miserable and

exhausted.

JAN

I'm so sorry I called you a

coward. I feel worse about that

than anything I've ever said to

you in our whole marriage.

PAUL

Even that time we went camping and

you called me Old Stinky Sam?

She can't help smiling at that. He returns the smile, offers

her a sip of beer. She takes it, sits.

JAN

Does Hal know? That Coffey's

innocent, I mean?

(Paul shakes his head)

Can he help? Does he have the

influence to do something about

this?

PAUL

No.

JAN

Then don't tell him. If he can't

help, don't tell him. Ever.

PAUL

I won't.

JAN

(beat)

There's no way out of this for

you, is there?

PAUL

No. I've been thinking about it,

too, believe me.

(beat)

Tell you the truth, honey. I've

done some things in my life I'm

not proud of, but this is the

first time I've ever felt in real

danger of hell.

JAN

Hell? Oh Paul...

(touches his face)

Talk to him. Talk to John. Find

out what he wants.

CUT TO:

INT. E BLOCK - NIGHT

Coffey sits quietly in his cell, a solitary firefly flitting

in circles around his finger. Paul and the men appear. The

firefly flits away, vanishing through Coffey's tiny window.

COFFEY

Hello, boss.

PAUL

Hello, John.

Brutal unlocks his cell. Paul enters.

PAUL

I guess you know we're coming down

to it now. Another couple of days.

(beat)

Is there anything special you'd

like for dinner that night? We can

rustle you up most anything.

Coffey gives it some careful thought.

COFFEY

Meatloaf be nice. Mashed taters

with gravy. Okra, maybe. I's not

picky.

PAUL

What about a preacher? Someone you

could say a little prayer with?

COFFEY

Don't want no preacher. You can

say a prayer, if you want. I could

get kneebound with you, I guess.

PAUL

Me?

Coffey gives him a look--please.

PAUL

S'pose I could, if it came to that.

Paul sits, working himself up to it:

PAUL

John, I have to ask you something

very important right now.

COFFEY

I know what you gonna say. You

don' have to say it.

PAUL

I do. I do have to.

(beat)

John, tell me what you want me to

do. You want me to take you out of

here? Just let you run away? See

how far you can get?

COFFEY

Why would you do such a foolish

thing?

Paul hesitates, emotions swirling, trying to find the right

words.

PAUL

On the day of my judgement, when

I stand before God, and He asks me

why did I kill one of his true

miracles, what am I gonna say?

That is was my job? My job?

COFFEY

You tell God the Father it was a

kindness you done.

(takes his hand)

I know you hurtin' and worryin',

I can feel it on you, but you

oughtta quit on it now. Because I

want it over and done. I do.

Coffey hesitates--now he's the one trying to find the right

words, trying to make Paul understand:

COFFEY

I'm tired, boss. Tired of bein' on

the road, lonely as a sparrow in

the rain. Tired of not ever having

me a buddy to be with, or tell me

where we's coming from or going

to, or why. Mostly I'm tired of

people being ugly to each other.

I'm tired of all the pain I feel

and hear in the world ever' day.

There's too much of it. It's like

pieces of glass in my head all the

time. Can you understand?

By now, Paul is blinking back tears. Softly:

PAUL

Yes, John. I think I can.

BRUTAL

There must be something we can do

for you, John. There must be

something you want.

Coffey thinks about this long and hard, finally looks up.

COFFEY

I ain't never seen me a flicker

show.

CUT TO:

TIGHT ON COFFEY'S FACE

gazing with wide-eyed, open-mouthed wonder, the light of a

motion picture projector flickering on his skin...

INT PRISON AUDITORIUM - NIGHT

...while Fred Astaire and Ginger Rogers dance up there on the

big screen, images flowing in magical black and silver tone.

FRED ASTAIRE

(singing)

Heaven, I'm in heaven...and my

heart beats so that I can hardly

speak...

Paul and the men are scattered about in the otherwise empty

auditorium, also watching.

PROJECTION BOOTH

Toot operates the projector, peering through the tiny window

into the theater. He yawns, glances at his watch. Late.

IN THE AUDITORIUM

Fred and Ginger are now in the most passionate and graceful

part of the dance. Irving Berlin's music swells.

COFFEY

can't believe what he's seeing. He's so excited his breath is

caught in his throat. Softly:

COFFEY

Why, they's angels. Angels. Just

like up in heaven...

DISSOLVE TO:

INT. E BLOCK - NIGHT

FOUR PAIRS OF FEET come marching up the Green Mile.

ANGLE ON COFFEY

Paul appears at the bars with Brutal, Harry, and Dean.

Nothing is said. Coffey knows why they're here. He rises as

Brutal unlocks the cell, slides the door open. Coffey steps

out, looks around at their dazed and sad faces.

COFFEY

I be all right, fellas. This

here's the hard part. I be all

right in a little while.

Paul indicates St. Christopher medal around John's neck:

PAUL

John, I should have that just for

now. I'll give it back after.

John lets him take the necklace. Paul pockets it. They start

to walk the Mile as:

COFFEY

You know, I fell asleep this

afternoon and had me a dream. I

dreamed about Del's mouse.

PAUL

Did you, John?

COFFEY

I dreamed he got down to that

place Boss Howell talked about,

that Mouseville place. I dreamed

there was kids, and how they

laughed at his tricks! My!

He laughs at the memory of it, then grows more serious:

COFFEY

I dreamed those two little blonde-

headed girls were there. They 'us

laughing, too. I put my arms

around 'em and sat 'em on my

knees, and there 'us no blood

comin' outta their hair and they

'us fine. We all watch Mr. Jingles

roll that spool, and how we did

laugh. Fit to bus', we was.

Behind them, Dean stifles a sob.

PAUL'S INNER OFFICE

Coffey kneels. Paul joins him, self-conscious and uncertain.

PAUL

What should we pray for, John?

COFFEY

Strength?

Paul nods--strength it is. Dean surprises Brutal and Harry by

also kneeling. Brutal and Harry hesitate...then join them.

PAUL

God, please help us finish what

we've started, and please welcome

this man, John Coffey--like the

drink, but not spelled the same--

into heaven and give him peace.

Please help us to see him off the

best we can and let nothing go

wrong. Amen.

Paul starts to rise, but Coffey takes his hand.

COFFEY

I know a prayer I once heard. Can

I say it?

PAUL

You go right ahead, John. Take all

the time you need.

Coffey closes his eyes, frowning in deep concentration.

COFFEY

Baby Jesus, meek and mild, pray

for me...

And Paul sees:

Kathe and Cora Detterick kneeling together in the enclosed

porch that night, just before their bedtime:

KATHE AND CORA

...and every child. Be my

strength, be my friend...

And then the vision is gone as:

COFFEY

...be with me until the end. Amen.

Coffey rises, offers Paul his hand, helps him up.

EXECUTION CHAMBER

Full house tonight. Bill Dodge is waiting at Old Sparky.

Silence as Coffey is led in, all eyes on him. Klaus and

Marjorie Detterick are in the front row. She mutters:

MARJORIE

Die slow, you bastard.

COFFEY

is faltering as Paul and Brutal bring him to the chair.

COFFEY

They's a lot of folks here hate

me. A lot. I can feel it. Like

bees stinging me. It hurts.

BRUTAL

Feel how we feel, then. We don't

hate you--can you feel that?

Coffey tries to take comfort in it, but flinches as:

MARJORIE

Kill him twice, you boys! You go

on and kill that raping baby-

killer twice, that'd be fine!

She dissolves into tears. Klaus pulls her against his

shoulder, looking dazed by the whole thing.

Paul and Brutal turn John around, sit him down. Paul notices

Dean crying again, his back to the witnesses. They kneel to

apply the leg clamps, while Brutal and Harry secure the arms.

PAUL

Wipe you face before you stand up,

Dean.

Dean nods, wiping his face with the sleeve of his coat. They

rise, stepping back. This time, Paul's out front:

PAUL

Roll on one.

Van Hay cranks the generator. The lights flare hotter and

brighter. It's just like in Melinda's bedroom the night

Coffey cured her with a kiss. Airless and bright, dreamlike.

MARJORIE

Does it hurt yet? I hope it does!

I hope it hurts like hell!

PAUL

John Coffey...you have been

condemned to die in the electric

chair by a jury of your

peers...sentence imposed by a

judge in good standing in this

state. Do you have anything to say

before sentence is carried out?

John hesitates, nods.

COFFEY

I'm sorry for what I am.

MARJORIE

You ought to be! Oh, you monster,

you damn well ought to be!

Brutal takes the mask from the hook to draw it over Coffey's

head. Coffey looks to Paul with terrified, pleading eyes.

COFFEY

Please, boss, don't put that thing

over my face. Don't put me in the

dark, I's afraid of the dark.

PAUL

All right, John.

Brutal puts the mask back, proceeds with the sponge.

IN TIGHT ANGLES

The cap is lowered, the straps drawn. Coffey is breathing

fast, terrified, muttering under his breath:

COFFEY

...heaven...I'm in heaven...

heaven...heaven...heaven...

THE WITNESSES

sit and wait, barely breathing.

JACK VAN HAY

is poised at the switch, wondering why the order won't come.

PAUL

is staring at Coffey, unable to say the words.

BRUTAL

(whispers)

Paul. You have to say it. You have

to give the order.

Paul can't. He reaches out and touches Coffey's hand. Their

fingers clasp. In that moment, staring into his eyes, Paul

hears the last thought that ever goes through Coffey's head:

COFFEY

(whispered V.O.)

He kill 'em with they love. That's

how it is ever' day. All over the

worl'...

Their fingers disengage. Paul steps back, eyes still locked

with Coffey's, and says the hardest words he's ever spoken:

PAUL

Roll on two.

Van Hay throws the switch. Coffey surges forward, fingers

splayed and jittering past Old Sparky's arms.

Lights begin blowing out all over the Mile, raining shattered

glass and sparks. Some of the witnesses scream.

A thin line of blood comes trickling out of Klaus Detterick's

nose. He reaches up, absently wipes it away.

Coffey's eyes are locked on Paul's, riding the lightning all

the way. He finally slumps. Van Hay kills the current.

Coffey's expression is peaceful, as if sleeping. A final pair

of tears drift gently down his cheeks.

CUT TO:

INT. ACCESS TUNNEL - NIGHT

Paul ever so carefully replaces the St. Christopher's medal

around Coffey's neck. They wheel him down the tunnel.

CUT TO:

INT. PAUL'S MODEL T - NIGHT

Paul drives home, his heart numb.

EXT. PAUL'S HOUSE - NIGHT

Paul pulls in, cuts the engine. He sits for a moment, then

gets out and heads for the house.

The door opens. Jan steps out in her nightgown and robe to

meet him on the stairs. She takes him in her arms.

Paul can't hold it back anymore. He breaks down sobbing

against her as we

DISSOLVE TO:

INT. NURSING HOME SUNROOM - PRESENT DAY

It's late in the day as:

PAUL

That was the last execution I ever

took part in. Just couldn't do it

anymore after that. Brutal either.

We both transferred out, took jobs

with Boys' Correctional.

(beat, nods)

That was all right. Catch 'em

young, that became my motto. Might

even have done some good.

ANGLE SHIFTS TO Elaine listening. Uncertain.

PAUL

You don't believe me.

ELAINE

I don't imagine you would lie to

me, Paul. It's just that...

PAUL

...It's quite a story.

ELAINE

Yes. Quite a story.

(pause)

One thing I don't understand. You

said you and Jan had a grownup son

in 1935. Is that right?

(Paul nods)

But if that's true...

PAUL

The math doesn't work, does it?

She shakes her head. Paul thinks for a moment, comes to a

decision.

PAUL

You feel up to a walk?

CUT TO:

EXT. GEORGIA PINES - DAY

The rain has mostly stopped. Brad Dolan, back in street

clothes, gets in his pickup truck and drives away...

INT. NURSING HOME - DAY

...while Paul and Elaine watch from a window.

EXT. GEORGIA PINES - DAY

This time, we see two red specks trudging slowly up the ridge

toward the treeline.

CUT TO:

EXT. WOODS - DAY

Paul brings Elaine along the wooded path into view of the

storage shacks. They're both wearing ponchos.

PAUL

There. It's in there.

ELAINE

Paul? This thing you want to show

me. Is it scary?

PAUL

Scary? No. Not really.

He gives her a smile, offers his hand. She takes it.

INT. SHACK - DAY

We see Paul approach through the grimy window as before, this

time bringing Elaine. ANGLE SHIFTS to the door as they

arrive, creaking open on rusty hinges to reveal them.

They enter. Elaine looks around at the musty nooks and

crannies, wondering what they're doing here. Paul touchers

arm, directs her attention:

PAUL

There.

Elaine moves closer, sees it on the dusty floorboards:

An old cigar box.

For a moment, she doesn't know what to make of it.

PAUL

Hey. Wake up, old boy. Wake up.

Elaine's breath catches in her throat...

...as a pair of bright oilspot eyes peer over the edge of the

cigar box. It's a mouse. His fur, once brown, is now all gray.

ELAINE

Paul? It isn't...it can't be...

Paul gets down on the floor, holds out his hand.

PAUL

Come over here, boy. Come on over

her and see this lady.

The mouse tries several times to get over the side of the

cigar box before he finally makes it. He comes to them,

hobbling and crippled with arthritis. Paul pulls a slice of

toast from his pocket, breaks off a small piece for the mouse.

ELAINE

That can't be Mr. Jingles.

Paul says nothing, just pulls a spool from his pocket. Mr.

Jingles might be old, but he's as obsessed as ever. He gets

ready to fetch, eyes riveted to the spool. Softly:

PAUL

Messieurs et mesdames. Beinvenue

au cirque du mousie.

Paul tosses the spool. The mouse limps painfully after it. He

reaches it, goes around...and has to lay down to catch his

breath. Elaine starts forward, but Paul holds her back.

After a moment, Mr. Jingles finds his feet again. He rises

and starts nosing the spool back to Paul.

ELAINE

Oh, Paul. Don't make him do it

again. I can't bear to watch.

PAUL

(softly)

But he loves it so much.

He glances around at the shack with a sad smile.

PAUL

This isn't exactly the Mouseville

we had in mind...but we make do,

don't we, old fella?

BRAD (O.S.)

As I live and breathe!

They gasp and spin. Brad Dolan stands in the doorway.

BRAD

Fooled you, didn't I Got yourself

a little love nest here, I see...

He pauses, seeing Mr. Jingles.

BRAD

...what the fuck? Is that a mouse?

PAUL

Don't hurt him, okay? Okay?

BRAD

It's a goddamn mouse, y'old fool,

they carry all kind'a disease...

Brad grabs an old garden hoe--the blade's rusted, but still

sharp enough to cut a mouse in two.

BRAD

...now step aside.

Paul rushes in front of Brad, fists clenched, yelling:

PAUL

You leave him alone, Percy! You

leave him alone, or by God I'll--

Brad gives Paul a hard shove, pins him against the wall.

BRAD

Who you calling Percy? Name's

Brad, you senile fucker. And I'm

gonna nail that mouse, you can

take that to the everfucking bank.

Elaine is suddenly at Brad's elbow, seething with fury:

ELAINE

How dare you? Get out!

BRAD

Piss off, you wrinkeldy old bitch.

Me and Paulie are talking.

ELAINE

His name is Mr. Edgecomb. If you

ever call him Paulie again, your

days of employment at Georgia

Pines will end.

BRAD

Who the hell you think you are?

ELAINE

I am the grandmother of the man

who is currently Speaker of the

Georgia House of Representatives.

A man who loves his relatives, Mr.

Dolan. All it would take is a

phone call.

Brad's smile falters. Elaine steps closer.

ELAINE

At first I thought I'd let you be.

I'm old, and that seemed easiest.

But when my friends are threatened

and abused, I do not let it be.

(icy beat)

Now get out, or you won't work

another day here. Not another

hour. I swear it.

Brad eases his grip on Paul...and backs off.

BRAD

Don't know what you're getting so

het up about. Just a damn mouse.

ELAINE

Get out, you ignorant man. What

little mind you have is ugly and

misdirected.

Brad flushes red, heads for the door. He pauses.

BRAD

Don't bother coming back here

tomorrow...Mr. Edgecomb Gonna be

a new lock on this door. This is

off-limits to residents, no matter

what Mrs. My Shit Don't Stink has

to say about it.

And off he goes. Paul tries to control the shaking in his

hands, looks to Elaine.

ELAINE

Little trick I learned from Percy

Wetmore.

PAUL

Is your grandson really Speaker of

the House?

ELAINE

He is.

Paul bends down, picks Mr. Jingles up.

PAUL

You gonna thank the lady? She just

saved your old mousie hide.

The mouse stretches his neck forward, nose twitching,

smelling Paul's breath. Paul looks to Elaine. Softly:

PAUL

I think Mr. Jingles happened by

accident. I think when we

electrocuted Del, and it all went

so badly...well, John could feel

it, you know...and I think a tiny

part of whatever was inside of him

just leapt out...

(beat)

Me, I was no accident. John had to

give me a little part of

himself...a gift, like...so I

could see for myself what Wild

Bill had done. When John did that,

a part of whatever power worked

through him spilled into me.

ELAINE

He...what? Infected you with life?

Paul looks at the mouse, strokes him gently between the ears.

PAUL

That's as good a word as any. He

infected us both, didn't he, Mr.

Jingles. With life.

(beat)

I'm a hundred and five years old,

Elaine. I was forty the year John

Coffey walked the Green Mile.

ELAINE

...oh my God...

CAMERA PUSHES SLOWLY IN on Paul as:

PAUL

I haven't even had a cold since

1935. I've had to watch my friends

and loved ones die off through the

years...Hal and Melinda...Brutus

Howell...my wife...my son...

(beat)

...and you, Elaine. You'd die,

too, and my curse is knowing I'll

be there to see it...

DISSOLVE TO:

INT. FUNERAL HOME - DAY

Paul, dressed in a dark suit, comes up the aisle. ANGLE

SHIFTS to reveal Elaine Connelly lying in the open casket.

PAUL (V.O.)

...that's my punishment, you see?

My punishment for letting John

Coffey ride the lightning...for

killing a miracle of God...

Paul lays a rose atop the casket.

PAUL (V.O.)

...you'll be gone, like all the

others, and I'll have to stay...

EXT. CEMETERY - DAY

Paul stands at the graveside as the casket is lowered.

PAUL (V.O.)

I'll die eventually, I imagine. I

have no illusions of immortality.

But I will have wished for death

long before death finds me.

He turns and walks away.

PAUL (V.O.)

In truth, I wish for it already.

INT. E BLOCK - NIGHT(1935)

Empty and silent. Young Paul walks the Mile alone, listening

to the quiet. He pauses, seeing something. A whisper:

PAUL

Mr. Jingles?

It is Mr. Jingles. The little mouse is peering from under the

restraint room door. He's come home, looking bedraggled. Paul

bends down, gently picks him up.

PAUL

Where you been, boy? I've been

worried about you. You hungry?

Paul turns and head back up the Green Mile, carrying the

mouse cupped in his hands as we

MATCH DISSOLVE TO:

INT. NURSING HOME - DAY

Young Paul transforms into Old Paul in the dissolve, the

corridor of the Green Mile becoming the corridor of the

nursing home. He's walking along, holding the little mouse

the same way he did over sixty years ago.

PAUL (V.O.)

I lie in bed most nights, thinking

about it. And I wait...

DISSOLVE TO:

INT. PAUL'S BEDROOM - NIGHT

Paul lies awake, staring at the moon outside his window.

PAUL (V.O.)

I think about all the people I've

loved, now long gone.

I think about my beautiful Jan,

and how I lost her so many years

ago. I think about all of us

walking our own Green Mile, each

in our own time. But one thought,

more than any other, keeps me

awake most nights...

(beat)

...if he could make a mouse live

so long, how much longer do I have?

He looks over at the nightstand...

PAUL (V.O.)

We each owe a death, there are no

exceptions, but sometimes, oh God,

the Green Mile is so long...

...and WE PAN to reveal Mr. Jingles sleeping fitfully in his

cigar box, chasing that spool in his dreams as we

FADE OUT:
